# Supplementary material for: Widespread discrepancy in Nnt genotypes and genetic backgrounds complicates granzyme A and other knockout mouse studies
Source: eLife journal article supplement (doi:10.7554/elife.70207), 2022-01-11

# Nnt (C57BL/6J)

Gene: Nnt ENSMUSG00000025453

Description

nicotinamide nucleotide transhydrogenase [Source:MGI Symbol;Acc:MGI:109279 [↗](#)]

Gene Synonyms

4930423F13Rik

Location

Chromosome 13: [119,335,448-119,408,997](#) reverse strand.  
GRCm38:CM001006.2

About this gene

This gene has 5 transcripts ([splice variants](#)), [270 orthologues](#), [1 paralogue](#), is a member of [1 Ensembl protein family](#) and is associated with [6 phenotypes](#).

Transcripts

Hide transcript table

| Show/hide columns (1 hidden) |                                       |      |                       |                                       |                           |                        |                                 |
|------------------------------|---------------------------------------|------|-----------------------|---------------------------------------|---------------------------|------------------------|---------------------------------|
| Name                         | Transcript ID                         | bp   | Protein               | Biotype                               | CCDS                      | UniProt                | Flags                           |
| Nnt-202                      | <a href="#">ENSMUST00000099149.9</a>  | 3464 | <a href="#">835aa</a> | <div><div></div>Protein coding</div>  | <a href="#">CCDS84067</a> | <a href="#">Q8BGK0</a> | TSL:1 GENCODE basic APPRIS P2   |
| Nnt-203                      | <a href="#">ENSMUST000000109204.7</a> | 3198 | <a href="#">713aa</a> | <div><div></div>Protein coding</div>  | -                         | <a href="#">E9Q8F4</a> | TSL:5 GENCODE basic             |
| Nnt-201                      | <a href="#">ENSMUST00000069902.12</a> | 3122 | <a href="#">721aa</a> | <div><div></div>Protein coding</div>  | -                         | <a href="#">Q8C9V5</a> | TSL:1 GENCODE basic APPRIS ALT2 |
| Nnt-204                      | <a href="#">ENSMUST000000133627.7</a> | 2340 | No protein            | <div><div></div>Retained intron</div> | -                         | -                      | TSL:1                           |
| Nnt-205                      | <a href="#">ENSMUST000000144599.1</a> | 1885 | No protein            | <div><div></div>Retained intron</div> | -                         | -                      | TSL:1                           |

## Summary

Name

[Nnt](#) (MGI Symbol)

CCDS

This gene is a member of the Mouse CCDS set: [CCDS84067.1](#)

Ensembl version

ENSMUSG00000025453.18

Gene type

Protein coding

Annotation method

Annotation for this gene includes both automatic annotation from Ensembl and Havana manual curation, see [article](#).

Alternative genes

This gene corresponds to the following database identifiers:

Havana gene: [OTTMUSG00000021068](#)

Nnt transcripts

C57BL/6J

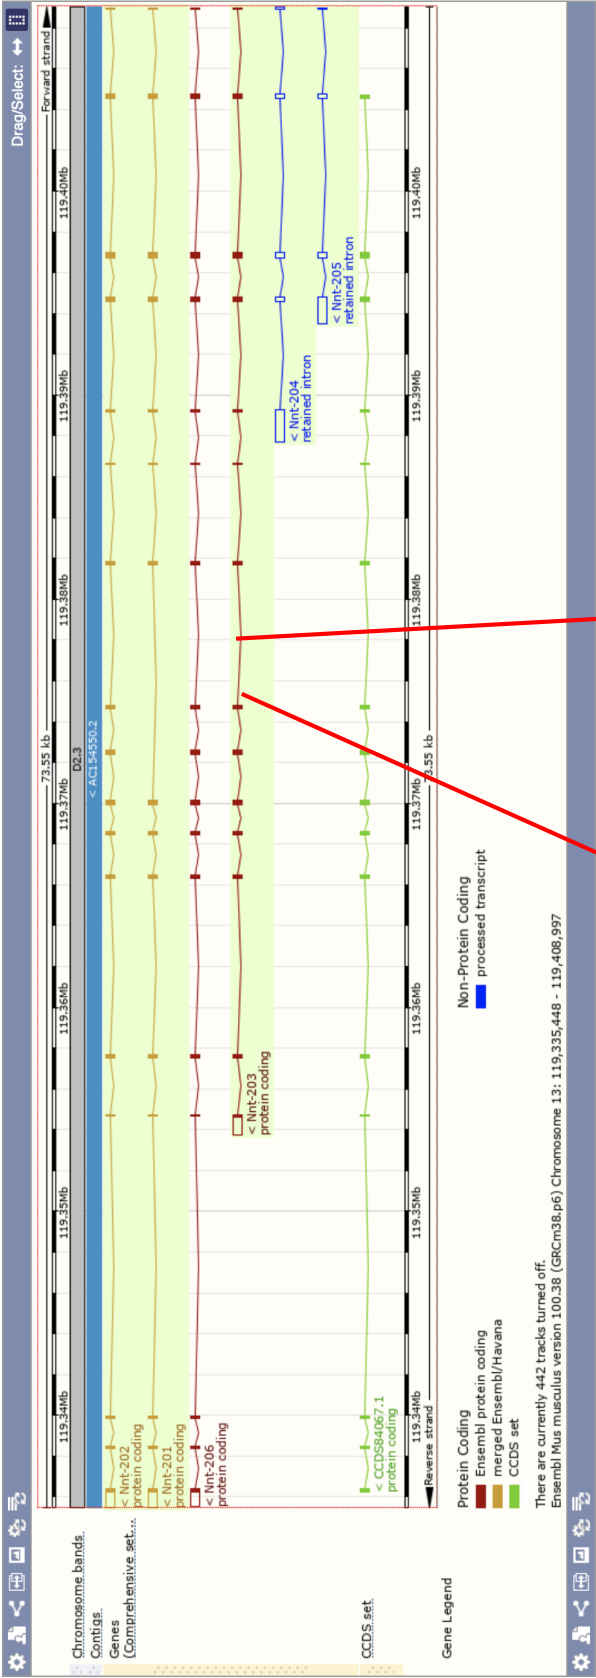

129  
C57BL/6N

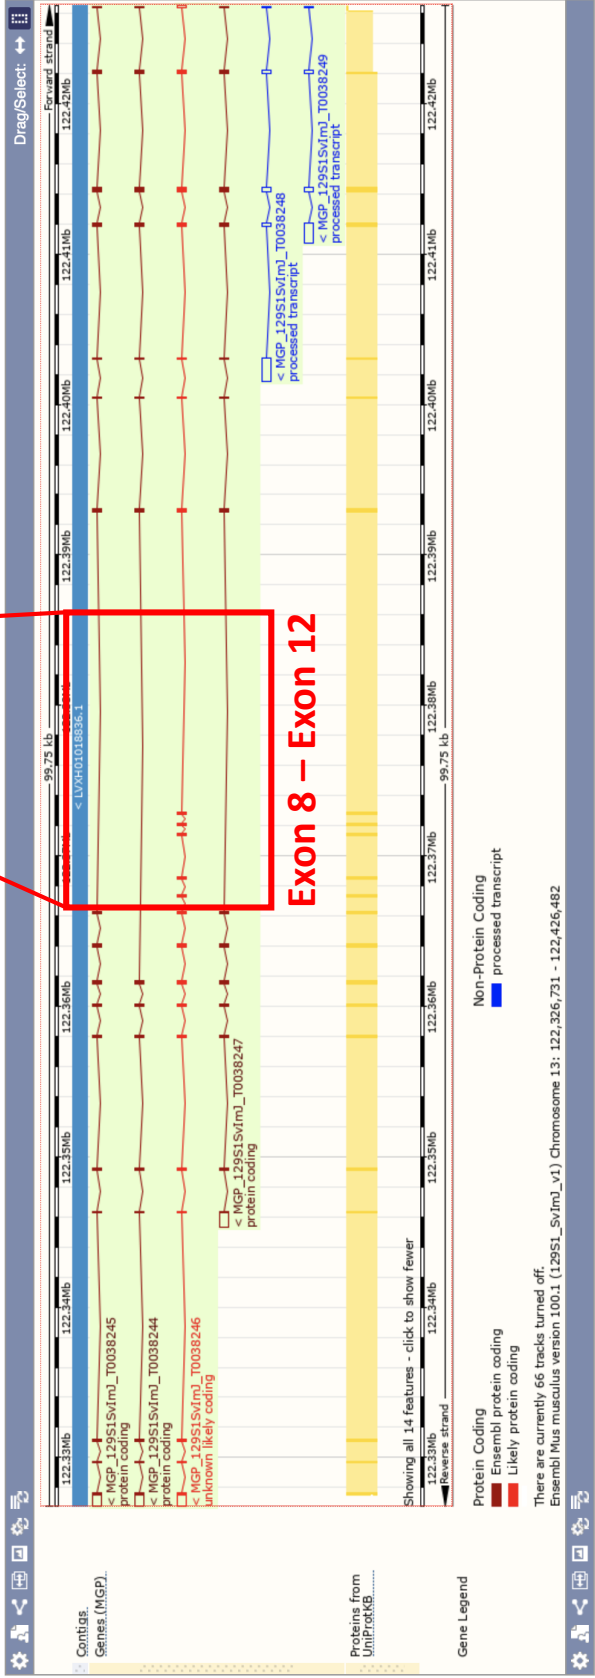

Exon 8 – Exon 12

Nnt gene structures

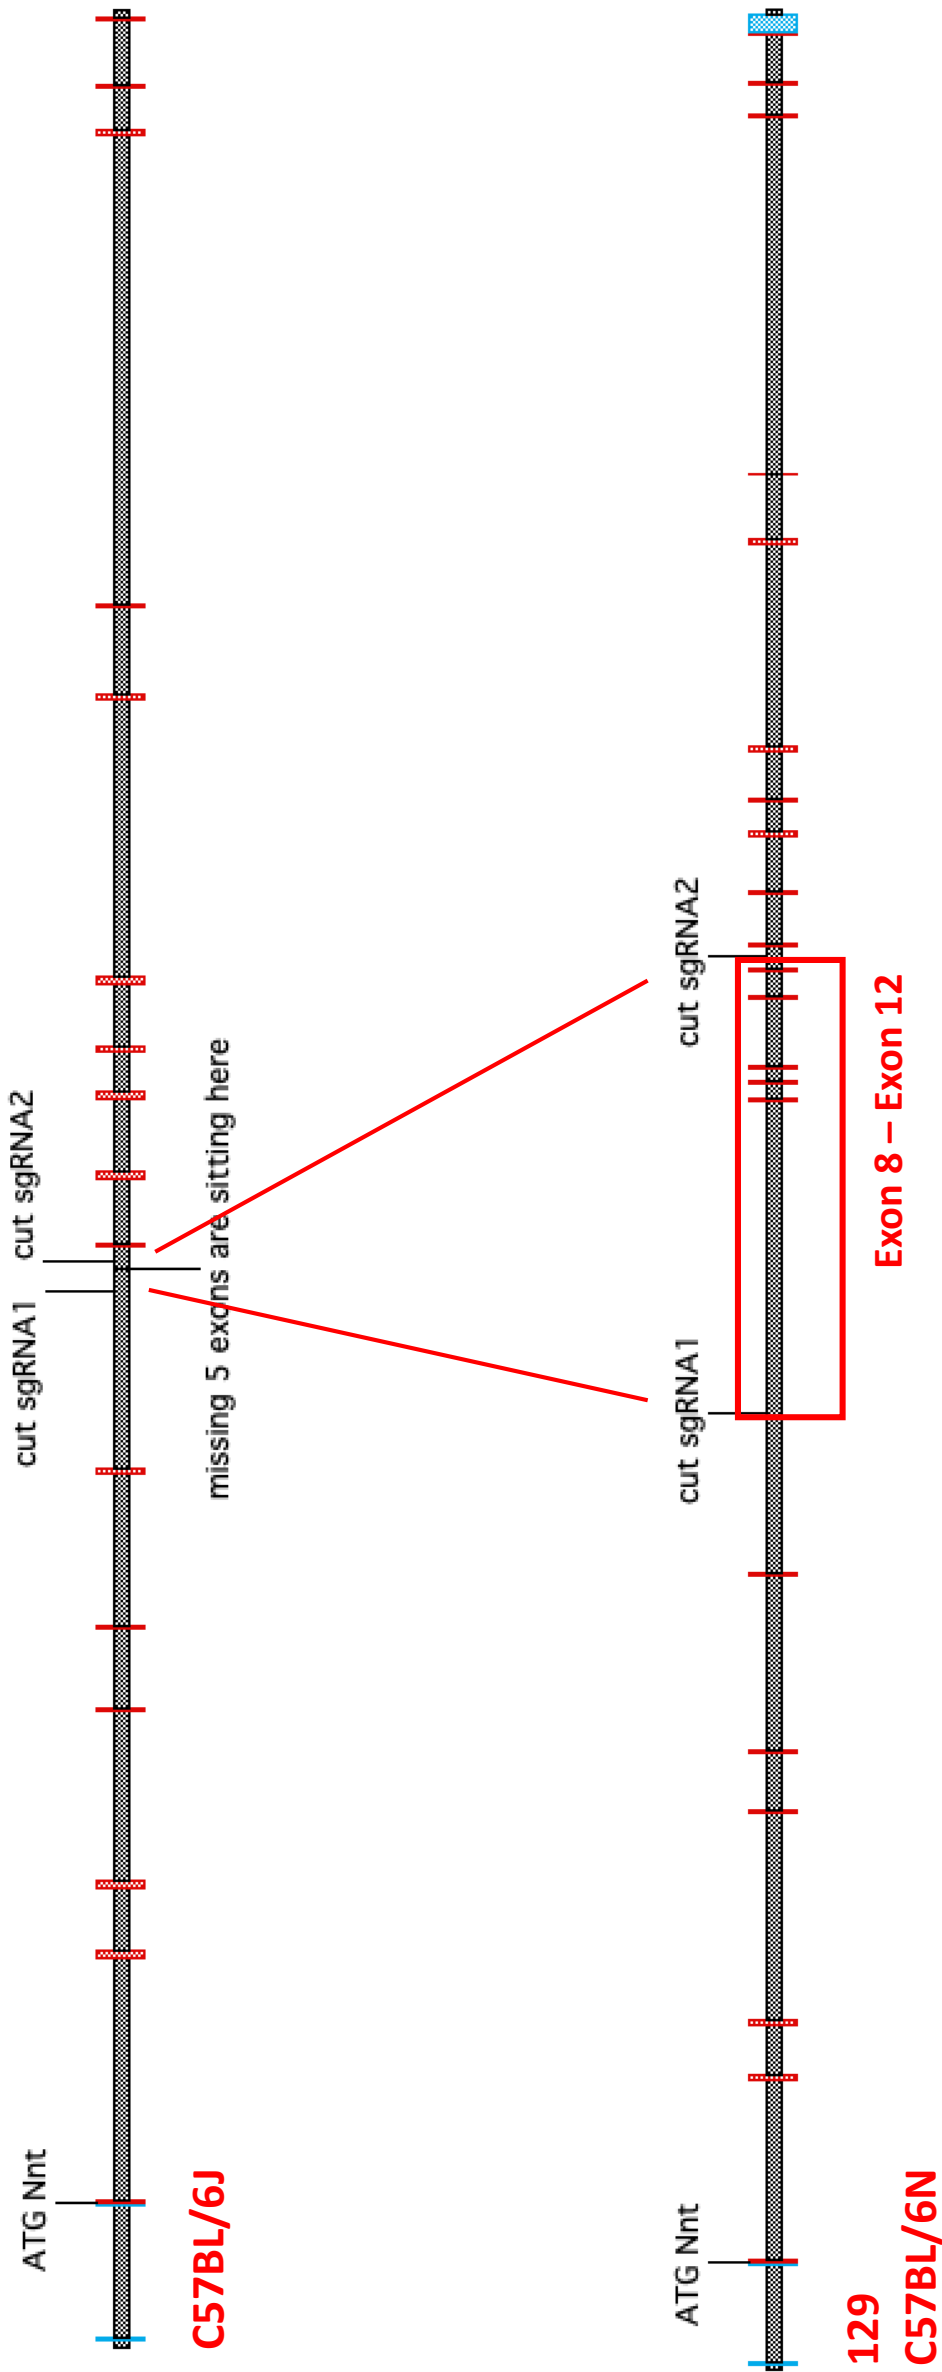

Positions of sgRNAs Nnt (shown on 6J genomic DNA)

|                                  |             |            |             |             |             |             |             |
|----------------------------------|-------------|------------|-------------|-------------|-------------|-------------|-------------|
| 1                                | ATAGTCACTT  | TTATTCTTTA | AAGGCTATCT  | AAAGAAAGCT  | GGACAGAACA  | CTCTGTTGGC  | TTTTTTTTTT  |
| 71                               | TTTTTTTTAA  | ATAGGATCAT | TGTAAAAGCT  | AACTTAAGAC  | TGGAAACTTA  | GCTCTCTTAA  | ATTATCCAAA  |
| 141                              | AACTAAAACA  | CATGCCCCGT | CTGCAATTTG  | AGGTGGCTAG  | CTTGACCCTT  | CAGGCACTGG  | AATTAGGAAG  |
| 211                              | TAGTGGAGGA  | TATTCAGGAA | TTGTAAAGTG  | TCTTGTGGG   | AAGGAAGATA  | TTCCTCGATT  | GTA AATTATA |
| 281                              | ACATCTTAAT  | CCCGGTTAGA | GAGCAGTATG  | TTTTGTGTTT  | ATCCTAGTTA  | GGGTCTATAA  | AATATCCCTG  |
| 351                              | TCACCGGACA  | CTTAAATCCT | CCACAACCTGG | GGAAGAGTTG  | GGAAGGAGGT  | GTTTTCCTCT  | GATGGGACTC  |
| 421                              | AGCCTAAGAT  | GTTGCAGTCA | CATAGAGCCA  | TAAATGATTC  | TGCCCTCTGAT | GCTGCCCCATT | TTTTCTTGAA  |
| 491                              | TGTATCTTCA  | TAGGATAGGA | TGACAGTCTT  | GAAAAGATGG  | CATTGCAGAC  | AGGAGACTAG  | TCCAGCGGTA  |
| 561                              | ACTGGCACTT  | GCTGGTGGAA | TTCCGCTGAG  | AGAACTCTTG  | CTCTGGCAAC  | TGTACAAAAG  | CCAGAAGAGT  |
| 631                              | TTATCATTCA  | GAGGGTTAGT | TTCTTCTCTG  | TGCACATTAT  | GATTTTAGAA  | GTCAAAAC TA | CATTGTGTAG  |
| 701                              | GTCAGCAACT  | CCCAATGTTT | TGGAAGTTGT  | ACTTCTTTTT  | TATTTTGAGT  | GCTGATACG   | TCCTTCATGG  |
| 771                              | TCCCCCTCCCT | TCCATTTAGT | TTATGACGCT  | ATCGAATTCT  | AAAATATTGC  | TTCCACACGA  | CCACTTATT C |
| missing 5 exons are sitting here |             |            |             |             |             |             |             |
| 841                              | TGAGAATTCT  | GAAAGACAGC | AAGAAATGCT  | TCGATGTTAC  | AACACTGCTT  | TGAGTGCAGA  | ACCAATCCTT  |
| 911                              | CCATACCCCC  | AGCCACACAG | TAATGTTCTG  | CTAGAAGCTA  | ACTGGGAAGT  | CATGGAATGC  | ATAGTTTTGG  |
| 981                              | ATAACATTGA  | CTTCCACTGT | CACCATGACA  | TTTGTA AATG | AGTACAAC TG | CAGATAAGAT  | TTTAGTTTAT  |
| 1051                             | TGCCTTATCA  | CAATGTTGTA | TGTTCCCTGAA | AACTGAAAGG  | CTAGCACATC  | ACTCATGTAT  | GACACTCATC  |
| 1121                             | TGATGCTATT  | TTATAGCTTA | AAATTCTTTA  | GTGGGTCCAA  | GGTAACTGTT  | GATACAGTAT  | GTGTTCTTTA  |
| 1191                             | TCATTTGCAA  | CAGAGTTTGA | TAAACAGAGT  | AACCTATCAG  | AGAAAAAATG  | CTGATTTT TG | ACCC        |

## Guides to delete exon 8 – exon 12 of Nnt (in 6N strain)

Nnt sgRNA1

CATGCCCCCGT CTGCAATTG

This guide cuts 6761 bp downstream of Exon 7 and 13210 bp upstream of Exon 8 of Nnt on C57BL/6N

Nnt sgRNA2

CAGTTACCTT GGACCCACTA

This guide cuts 527 bp downstream of Exon 12 of Nnt and 420 bp upstream of Exon 12 of Nnt on C57BL/6N

# Nnt KO genotyping strategy

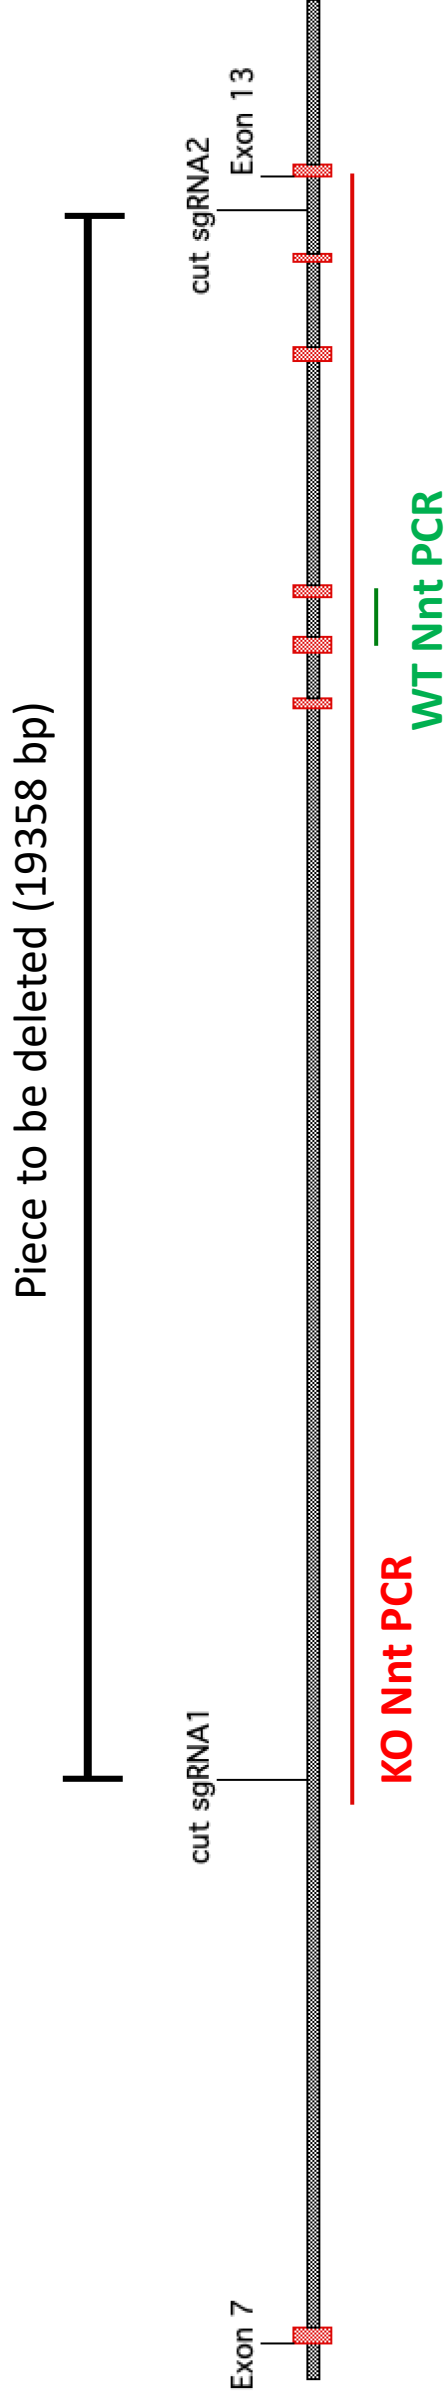

- |                    |                                    |
|--------------------|------------------------------------|
| WT MICE:           | WT PCR works / KO PCR doesn't work |
| HETEROZYGOUS MICE: | WT PCR works / KO PCR works        |
| HOMOZYGOUS MICE:   | WT PCR doesn't work / KO PCR works |

# WT genotyping PCR Nnt

PCR = 702 bp

part of exon 9

```
1 AG GCC ATC AGC CCT GAC AAG GAC AAT TTT CAC TTT GAA GTG AAG GAT GAC TTT GAC TTT GGT
P1
63 ACA ATG AGT CAC GTC ATT CGA GGG ACC GTG ATG AAG GTAGAGGTCC CCCTTTTTTGT GTTCTTCCTG
132 TGACCCCTGGA CTTAGGACTT CTGTCCCTTGA AGAATTCCAT TATGGAATAG AGATGTGTTT GAATAAAGTA
202 TTGGCATGTC AGTGGAATTT GTGTTAAAT GGAGAGTGAC TTAAGGAAAG CATTTCAAAG ACTCAAGTAT
272 GTATGAGTCA TTGAAAACAC ACCTCACTTT TGAAAACCAG GGCAGAAAT TTAATAAAGT AAAAATGAAT
342 TGTTCCTCCC ATGTACATAC TTTTCAGGGT TTGAACAGTA TTCCTCTATA TGTGTCCCAG ACATACAAAA
412 ATTACATGTG TGCAGCACAA ACATTATTCA CTTATATACC CATTTTGTA ATTATATGAA TTTATATGCA
482 TTAAAATTAT AGTTACAGTT TTTTTCCTCAG CATGCACTCT CTTCTGTCAG TCATTTTGAA ATGCTAATTT
Exon 10
552 GACTTTAAAA AACATTATTT CCTAATATTG GTTAG GAT GGC AAA GTG ATT TTC CCA GCT CCC ACA CCA
620 AAA AAT ATT CCC GAA GAA GCC CCA GTC AAA CCG AAG ACC GTG GCT GAG CTG GAA GCC GAG AAA
683 GCA GGC ACC GTC TCC ATG TA
P2
```

→ = genotyping oligo

Red sequence shown is part of exon 9 and Exon 10 of Nnt, sequence in back is intronic sequence



Genotyping strategy - wild type PCR

Primers P1 (5’ AGGCCATCAGCCCTGACAAG 3’) and P2 (5’ TACATGGAGACGGTGCTGC 3’) will amplify a product of 702bp from the wild type allele. Sequence analysis was used to determine the exact nature of modification events.

The assay was performed using AccuStart II GelTrack PCR SuperMix (Quantabio)

| Reagents              |        | Cycling parameters |      |       |            |
|-----------------------|--------|--------------------|------|-------|------------|
| 2X reaction buffer    | 15.0µl | Denature           | 94°C | 2min  | x1 cycle   |
| Forward primer (10µM) | 1.2µl  | Denature           | 94°C | 20sec | x35 cycles |
| Reverse primer (10µM) | 1.2µl  | Annealing          | 64°C | 20sec |            |
| Template              | 2.0µl  | Extension          | 72°C | 60sec |            |
| Water                 | 10.6µl | Extension          | 72°C | 5min  | x1 cycle   |
| Total                 | 30.0µl |                    |      |       |            |

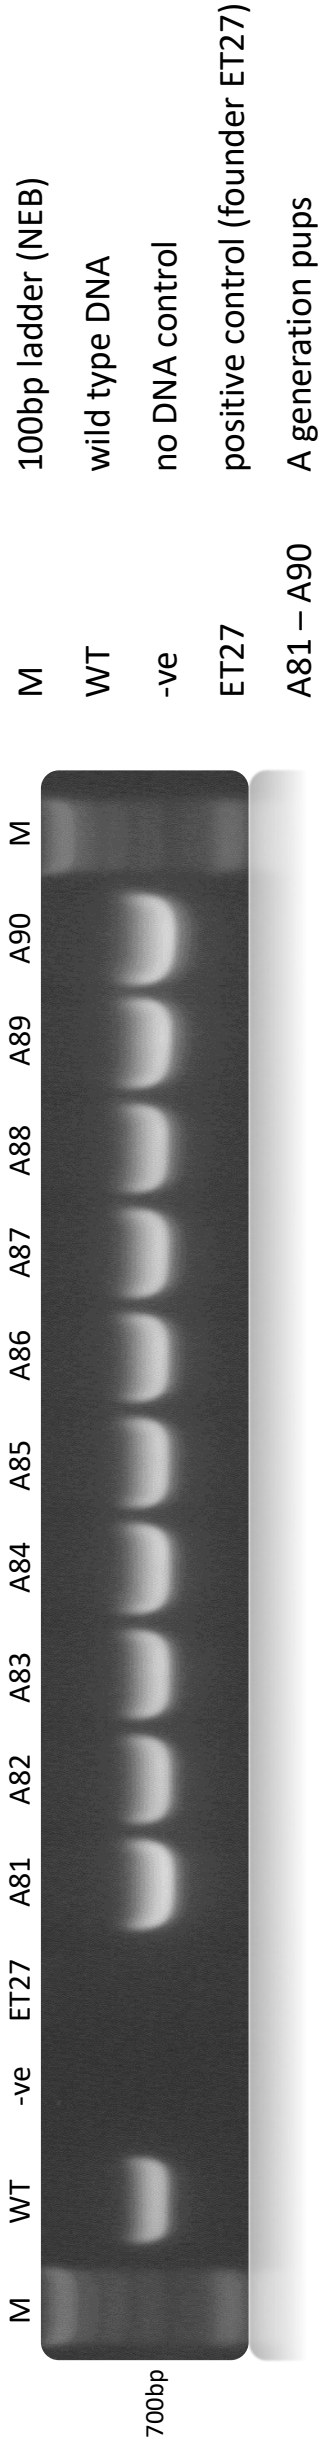



KO genotyping for Nnt

PCR = around 764 bp

(WT PCR band with these oligos is 20122 bp, this PCR won't work)

1

ACAGGCTAAT

CTGGGTGAGG

CACTACCTCA

TCTGAGATT

CCTCGTACTT

CAAACACAGT

AGTGGCTCAG

71

CAAAATATTGT

TCAACTCATA

ATCCTGTA

TGTTCCCTTAG

GTCTTGGTTG

GCATAGTCAC

TTTTATTCTT

141

TAAAGGCTAT

CTAAGAAAG

CTGGACAGAA

CACTCTGTTG

GCCTTTTTTT

TTTTTTTTTT

TTAAATAGGA

211

TCATTGTAGA

AGCTAACTTA

AGACTGGAAA

CTTAGCTCTC

TTAAATTATC

CAAAAACATA

AACACATGCC

281

CCGTCTGCAA

TTGGGTCCAA

GGTAACTGTT

GATACAGTAT

GTGTTCTTTA

TCATTTGCAA

CAGAGTTTGA

351

TAAACAGAGT

AACCTATCAG

AGAAAAAATG

CTGATTTTGT

ACCTTTTGTA

TTTCAAGCC

TTTAAATGGC

421

TATTTACTTT

TAGTCATGCA

GAAACAGTTG

GCCCTACGTT

CTGATAGCAA

GTTTTCTTCC

TAACTGTATC

491

TAGGGTTCCC

CGTATACTTC

ATCCACCCTTA

AGGGAACCTG

CTTTAATAAT

AGAGTGGCTT

TTGCTTTTGA

561

GGTTCAAACT

GTTACTTGAA

ATAATAGCAT

CACCTTGTA

TACTTAGTGA

TAAAGTATA

CTTAAAATAA

631

ATATGCTGTA

GCAGACGGAA

AAAAGTCATG

CTGTCTGACG

TGACACCTCT

TGCCGTGTTG

TGCTTCTCTT

701

GCTTCGGTAA

GGT GGT TTT CTG GTG ACT CAG AGA ATG CTG GAC ATG TTC AAG CGA CCC ACG GAC

Exon 13

P3

P4

= genotyping oligo

## Genotyping strategy - knockout PCR

Primers P3 (5' ACAGGCTAATCTGGTGAGGC 3') and P4 (5' GTCCGTGGTCTGCTGAACA 3') will amplify a product of 764bp from the correctly modified allele. Sequence analysis was used to determine the exact nature of modification events.

The assay was performed using AccuStart II GelTrack PCR SuperMix (Quantabio)

| Reagents              |               | Cycling parameters |      |       |
|-----------------------|---------------|--------------------|------|-------|
| 2X reaction buffer    | 15.0µl        | Denature           | 94°C | 2min  |
| Forward primer (10µM) | 1.2µl         | Denature           | 94°C | 20sec |
| Reverse primer (10µM) | 1.2µl         | Annealing          | 64°C | 20sec |
| Template              | 2.0µl         | Extension          | 72°C | 60sec |
| Water                 | 10.6µl        | Extension          | 72°C | 5min  |
| <b>Total</b>          | <b>30.0µl</b> |                    |      |       |

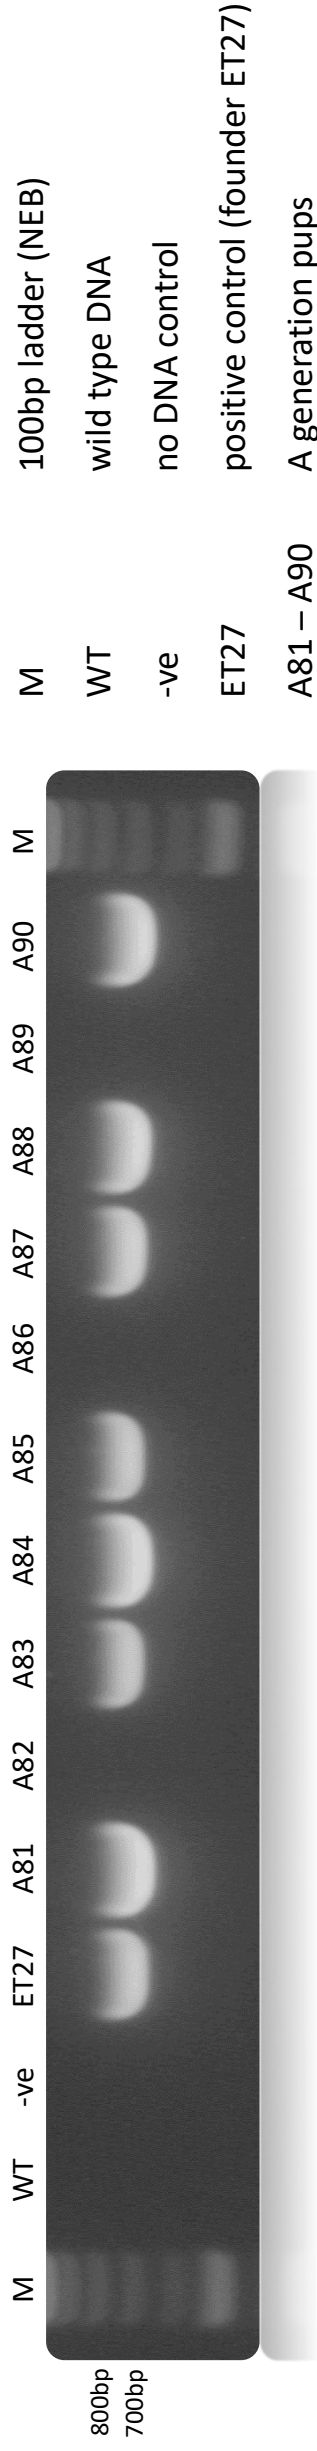

## Genotyping strategy

Primer P4 (5' GTCCGTGGTCTGCTGAACA 3') is used to sequence the knock out PCR product amplified using primers P3 and P4

## Sequencing chromatogram for animal ET27

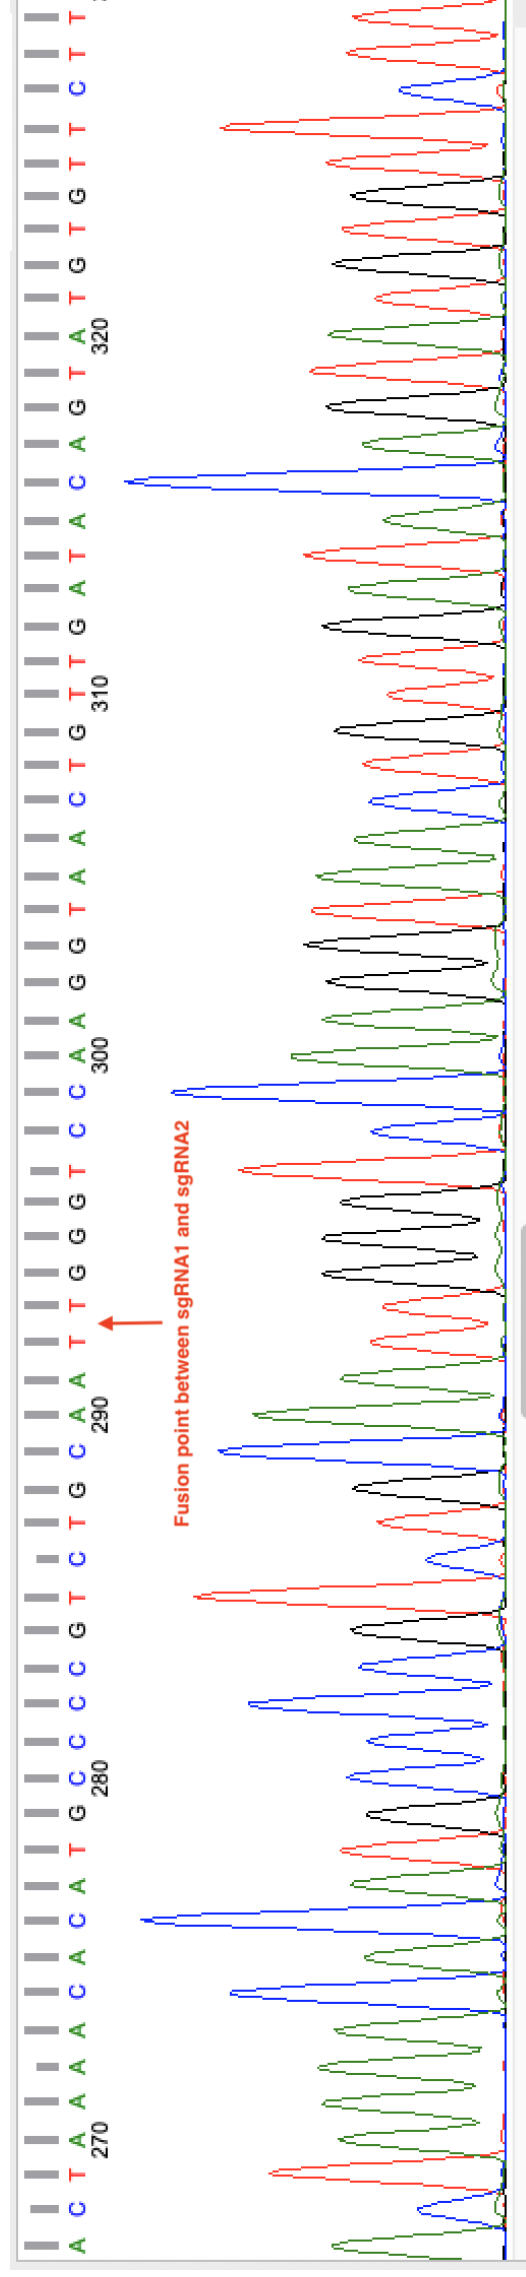

Supplement: supp9 [file Australian Phenomics Network report-source data for Figure 4 - figure supplement 1.pdf › Source_data_File_1/Australian Phenomics Network report-source data for Figure 4 - figure supplement 1.pdf]
