# Supplementary material for: Widespread discrepancy in Nnt genotypes and genetic backgrounds complicates granzyme A and other knockout mouse studies
Source: eLife journal article supplement (doi:10.7554/elife.70207), 2022-01-11
Supplement: supp9 [file Australian Phenomics Network report-source data for Figure 1 - figure supplement 1.pdf › Source_data_File_1/Australian Phenomics Network report-source data for Figure 1 - figure supplement 1.pdf]

## Gzma Cas9/CRISPR genome editing

### Genotyping strategy

The forward (5' TCAGCTGCTTTTGCCTGTTTCA 3') and reverse (5' GAGAAAGTCCCCTGTCCTCGG 3') genotyping primers will amplify a product of 628bp from the wild type modified alleles. BsaHI digestion of the PCR product amplified from the correctly modified allele will generate fragments of 290bp and 338bp. Sequence analysis was used to determine the exact nature of modification events.

The assay was performed using AccuStart II GelTrack PCR SuperMix (Quantabio)

### Wild type allele

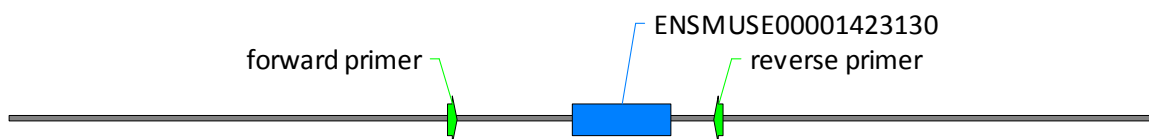

### Reagents

|                       |               |
|-----------------------|---------------|
| 2X reaction buffer    | 15.0μl        |
| Forward primer (10μM) | 1.2μl         |
| Reverse primer (10μM) | 1.2μl         |
| Template              | 2.0μl         |
| H <sub>2</sub> O      | 9.4μl         |
| <b>Total</b>          | <b>30.0μl</b> |

### Cycling parameters

|           |      |       |            |
|-----------|------|-------|------------|
| Denature  | 94°C | 2min  | x1 cycle   |
| Denature  | 94°C | 20sec | x35 cycles |
| Annealing | 62°C | 20sec |            |
| Extension | 72°C | 45sec |            |
| Extension | 72°C | 5min  | x1 cycle   |

## PCR result – progeny of ET44

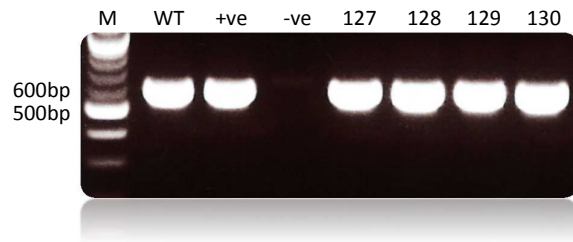

## Restriction digest - BsaHI

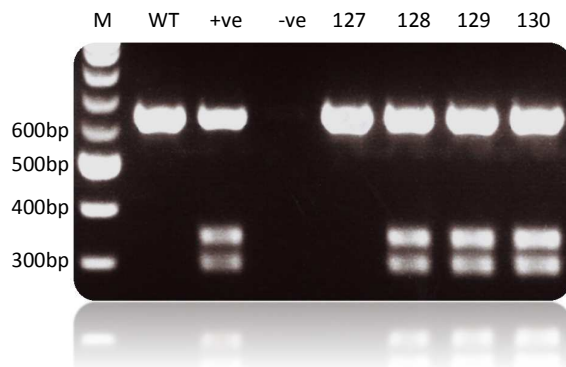

|           |                             |
|-----------|-----------------------------|
| M         | 100bp ladder (NEB)          |
| WT        | wild type                   |
| +ve       | positive control            |
| -ve       | no DNA control              |
| 127 – 130 | A generation pups 127 – 130 |
