# Supplementary material for: Widespread discrepancy in Nnt genotypes and genetic backgrounds complicates granzyme A and other knockout mouse studies
Source: eLife. 2022 Feb 4;11:e70207. doi: 10.7554/eLife.70207 (PMC8816380; doi:10.7554/eLife.70207)
Supplement: Supplementary file 2. — Datasets for RNA-Seq and Ingenuity Pathway Analysis (IPA) of mice feet day 6 post infection from CHIKV-infected Gzma-/- mice vs. CHIKV-infected 6J mice and of mice feet day 7 post infection from 6J + CHIKV vs. 6J mock infection. [file elife-70207-supp2.xlsx]

## Sheet: a All genesGzma+CHIKVvs6J+CHIKV
RNA-Seq of day 6 feet post infection from CHIKV-infected Gzma-/- mice versus CHIKV-infected 6J mice (Gzma-/-+CHIKV vs 6J+CHIKV; NCBI Bioproject PRJNA664644)	Ensembl Gene ID	gene_id	logFC	logCPM	F	PValue	FDR	C57_1	C57_2	C57_3	GrzA_1	GrzA_2	GrzA_3
	ENSMUSG00000090015.8	Gm15446	-6.5941	3.04763	512.217	2.18201e-18	1.20929e-13	259.26	272.06	239.06	1.13	1.14	4.67
	ENSMUSG00000020893.17	Per1	-1.71008	6.49626	304.675	2.42783e-14	4.4851e-10	2624	2337	1757	569	685	629
	ENSMUSG00000068073.2	1110025L11Rik	4.11893	3.28813	352.999	2.07738e-14	4.4851e-10	17.58	19.01	13.5	201.28	260.58	364.39
	ENSMUSG00000068078.4	2310034C09Rik	3.92698	2.40256	223.68	4.02195e-14	5.57251e-10	13	8	10	143	108.81	186.53
	ENSMUSG00000035299.16	Mid1	2.6268	7.74486	506.384	2.03602e-13	1.72277e-09	1110.75	1012.99	782.64	4604.31	6545.96	5370.98
	ENSMUSG00000050224.3	Krtap13	4.41952	1.84965	195.211	1.8984e-13	1.72277e-09	6.99	5	2.5	86.84	81.93	134.09
	ENSMUSG00000098975.7	Gm27177	-2.70833	3.0279	192.869	2.17596e-13	1.72277e-09	176.97	251.51	235.18	29.28	32.37	33.21
	ENSMUSG00000074489.9	Bglap3	1.63153	4.64329	188.654	2.79243e-13	1.90179e-09	236.15	204.86	150.56	485.64	579.7	620.18
	ENSMUSG00000118434.1	AL824709.1	-6.60297	1.47718	186.975	3.08838e-13	1.90179e-09	85.21	91.28	72.96	1.83	0	0
	ENSMUSG00000096780.7	Tmem181b-ps	1.41139	4.72824	183.866	3.72962e-13	2.06699e-09	232.35	233.74	231.7	512.59	592.06	611.9
	ENSMUSG00000009047.4	Gm5965	4.28102	1.53217	170.043	8.94105e-13	4.12935e-09	3.01	5	5.09	75.75	67.22	96.51
	ENSMUSG00000054905.2	Stfa3	1.37324	4.73787	170.759	8.53225e-13	4.12935e-09	278	217	224	528	610	577
	ENSMUSG00000022066.16	Entpd4b	-1.21168	5.2283	166.114	1.1595e-12	4.94312e-09	901.33	840.68	782.16	296.89	331.27	376.82
	ENSMUSG00000028544.14	Slc5a9	1.22642	4.8672	152.568	2.96557e-12	1.0957e-08	304	289	252	540	637	646
	ENSMUSG00000033579.16	Fa2h	-0.994288	6.53656	152.827	2.91091e-12	1.0957e-08	2121	1947	1904	849	966	950
	ENSMUSG00000018907.10	Alox12e	1.10569	7.0976	148.185	4.0811e-12	1.41362e-08	1653	1435	1139	2648	2855	2837
	ENSMUSG00000095463.8	Entpd4	-1.09889	5.40914	146.622	4.58238e-12	1.49388e-08	986.27	943.8	864.24	343.88	426.63	433.29
	ENSMUSG00000057855.2	Krtap6-3	4.25376	1.27901	135.391	1.08824e-11	3.35062e-08	5	3	3	57	51	92
	ENSMUSG00000045331.3	2310079G19Rik	2.75992	2.5524	142.703	1.21325e-11	3.53894e-08	23	26	23	144	109	199
	ENSMUSG00000048830.3	2310057N15Rik	5.98212	1.21402	147.05	2.38443e-11	6.47915e-08	0	1	2.41	55.42	50.04	92.88
	ENSMUSG00000070868.11	Skint3	1.28036	4.71727	125.502	2.45506e-11	6.47915e-08	297	242	205	497	521	643
	ENSMUSG00000024846.6	Cst6	0.927571	6.72554	124.836	2.59832e-11	6.54553e-08	1316	1202	1020	1920	2161	2107
	ENSMUSG00000076613.4	Ighg2b	3.41403	2.99957	214.172	2.89524e-11	6.97641e-08	25	24	17	259	154	234
	ENSMUSG00000091618.3	H60c	0.97616	5.64776	122.239	3.24938e-11	7.50349e-08	611.78	503.77	518.81	907.81	971.78	1083.77
	ENSMUSG00000023132.8	Gzma	-5.58517	4.86047	690.231	7.63201e-11	1.69189e-07	838	901	977	22	10	20
	ENSMUSG00000012350.15	Ehf	1.14851	5.13549	114.361	1.21341e-10	2.58648e-07	383	392	284	652	676	832
	ENSMUSG00000016024.9	Lbp	-0.938012	6.56037	106.673	1.35689e-10	2.78519e-07	2275	2125	1620	925	922	1035
	ENSMUSG00000029675.12	Eln	-1.09258	6.8414	126.253	1.49641e-10	2.96187e-07	2526.93	2372	2623	906	1111.9	1252.91
	ENSMUSG00000072674.10	Plac9b	-1.10504	4.86903	104.295	1.71333e-10	3.27429e-07	695.34	571.62	650.87	235.12	273.97	315.44
	ENSMUSG00000025813.14	Homer2	0.956186	5.76287	102.421	2.06523e-10	3.81524e-07	663.61	625.45	502.3	909.19	1063.27	1229.31
	ENSMUSG00000116710.1	Gm6557	1.72625	3.17995	100.485	2.51247e-10	4.49173e-07	85.16	68.36	50.3	172.5	199.11	246.35
	ENSMUSG00000037263.13	Aldh3b3	1.99882	2.69406	98.1003	3.21193e-10	5.56276e-07	45.63	44.17	34.02	111.82	149.78	196.78
	ENSMUSG00000027073.5	Prg2	-2.45436	2.19612	97.2621	3.50555e-10	5.71416e-07	149	126	87	24	13	23
	ENSMUSG00000042451.12	Mybph	-1.20933	5.49559	129.737	3.50366e-10	5.71416e-07	1120.44	1133.34	796.85	343.28	429.99	440.2
	ENSMUSG00000028716.15	Pdzk1ip1	0.924794	5.23507	96.7813	3.68693e-10	5.83809e-07	467	438	354	708	714	774
	ENSMUSG00000041660.8	Bbox1	0.935535	5.15267	96.339	3.86276e-10	5.9466e-07	422	405	354	672	646	761
	ENSMUSG00000020607.7	Lratd1	0.842052	6.23912	93.8511	5.0363e-10	7.34518e-07	989	844	789	1259	1438	1634
	ENSMUSG00000041120.6	Nbl1	-0.806684	6.68452	93.9701	4.97215e-10	7.34518e-07	2381	2106	1857	1003	1170	1164
	ENSMUSG00000105263.1	Gm42427	2.24293	2.25934	92.4477	5.86378e-10	8.33273e-07	18.12	34.35	27.15	103.03	110.2	134.67
	ENSMUSG00000110386.1	Gm42031	1.75552	5.25703	199.901	6.13768e-10	8.5039e-07	264.86	250.97	324.03	870.35	945.26	810.56
	ENSMUSG00000034159.12	Mab21l4	1.17101	4.50141	92.0948	6.85386e-10	9.26457e-07	265	208	201	389	445	565
	ENSMUSG00000050578.10	Mmp13	-0.814775	7.39564	90.24	7.47721e-10	9.63708e-07	3931	3405	3077	1796	1755	1884
	ENSMUSG00000054662.8	Ano9	0.891118	6.63464	92.158	7.33595e-10	9.63708e-07	1258	1161	959	1584	2016	2175
	ENSMUSG00000036951.2	C130079G13Rik	1.11771	4.61103	89.6423	7.99216e-10	1.00667e-06	263.42	228.02	252.2	432.68	456.19	602.08
	ENSMUSG00000030693.10	Klk10	1.24664	3.94145	88.009	9.60512e-10	1.16915e-06	162	139	138	257	328	378
	ENSMUSG00000038751.5	Ptk6	1.35587	3.79552	87.9186	9.70406e-10	1.16915e-06	143	136	98	260	270	358
	ENSMUSG00000069441.3	Dsg1a	0.942831	9.62465	86.1263	1.19121e-09	1.40464e-06	9502.93	8709.43	7975.09	13091.9	14766.3	18610.2
	ENSMUSG00000096255.2	Dynlt1b	0.952195	5.87343	97.1158	1.25607e-09	1.45027e-06	704.84	661.37	569.01	1254.41	1162.01	1016.18
	ENSMUSG00000028111.4	Ctsk	-0.871246	6.47322	87.466	1.65007e-09	1.8663e-06	1927	1668	1941	975	874	941
	ENSMUSG00000020357.3	Flt4	-0.921641	5.08291	82.7676	1.76522e-09	1.9312e-06	777	738	626	335	393	311
	ENSMUSG00000020646.17	Mboat2	1.08338	4.8504	89.4389	1.77715e-09	1.9312e-06	322	321	252	477	573	700
	ENSMUSG00000063458.13	Lrmda	-3.91664	0.566634	81.8623	1.96681e-09	2.0962e-06	39	46	35	1	2	4
	ENSMUSG00000019312.10	Grb7	1.1044	3.99218	81.3523	2.09119e-09	2.18671e-06	182	152	153	282	340	344
	ENSMUSG00000049972.4	Skint9	1.47052	4.17563	106.063	2.37742e-09	2.43998e-06	205	133	127	348	376	459
	ENSMUSG00000022229.3	Atp12a	1.94122	2.16235	78.9828	2.79156e-09	2.77244e-06	34	32	21.93	89.87	97.91	123.91
	ENSMUSG00000050808.13	Muc15	1.12797	4.34795	79.704	2.8014e-09	2.77244e-06	226	199	192	369	360	515
	ENSMUSG00000053475.5	Tnfaip6	-1.23779	3.68481	78.4459	2.98315e-09	2.89204e-06	287	312	263	104	101	132
	ENSMUSG00000069718.4	Gm11563	4.30547	1.06557	97.8775	3.02662e-09	2.89204e-06	3	4	2	31	54	87
	ENSMUSG00000055561.9	Spink5	1.19956	7.19215	126.622	3.09971e-09	2.91168e-06	1594	1457	1253	2425	3039	3660
	ENSMUSG00000025582.4	Nptx1	1.25091	3.49277	75.7638	4.17816e-09	3.85929e-06	126	101	94	232	216	254
	ENSMUSG00000037872.5	Ackr1	-0.838547	4.96306	75.3862	4.3843e-09	3.98332e-06	714.68	600.11	613.2	324.95	331.85	334.8
	ENSMUSG00000023036.14	Pcdhgc4	-0.937697	4.83892	74.9177	4.65541e-09	4.16141e-06	678.57	635.04	502.08	266.82	333.72	269.68
	ENSMUSG00000032334.10	Loxl1	-0.731205	6.36009	74.6794	4.80024e-09	4.22276e-06	1823	1740	1405	856	990	905
	ENSMUSG00000028195.4	Ccn1	-0.865063	5.55903	77.0164	4.87766e-09	4.22382e-06	1165	1013	775	480	476	529
	ENSMUSG00000001555.10	Fkbp10	-0.716685	5.65845	73.6603	5.47663e-09	4.54772e-06	1046.31	1044.79	938.68	542.95	581.46	575.36
	ENSMUSG00000039462.4	Col10a1	-1.25527	3.56652	73.6305	5.49787e-09	4.54772e-06	262	273	260	104	86	117
	ENSMUSG00000054619.7	Mettl7a1	0.688595	6.58328	73.7449	5.41671e-09	4.54772e-06	1304.9	1190.74	1061.95	1677.87	1786.78	1809.95
	ENSMUSG00000116659.1	Gm6551	1.53656	3.09142	73.2293	5.79302e-09	4.7214e-06	76.58	77.63	55.24	141.05	183.77	237.83
	ENSMUSG00000024511.15	Rab27b	0.885932	5.10888	72.5155	6.36129e-09	5.1094e-06	409	392	369	569	628	801
	ENSMUSG00000101257.1	2310015K22Rik	2.15463	1.54121	71.7475	7.0406e-09	5.57424e-06	20	15	15	66	67	73
	ENSMUSG00000020681.14	Ace	-0.734604	5.99655	71.4817	7.2936e-09	5.69322e-06	1276.7	1218	1342.85	674.62	725	732.84
	ENSMUSG00000008461.6	Fut1	1.19131	3.77237	71.2893	7.48281e-09	5.75979e-06	145	139	117	225	278	343
	ENSMUSG00000012017.4	Scarf2	-0.926096	4.62706	70.9644	7.81454e-09	5.93274e-06	571	495	492	206	284	267
	ENSMUSG00000022865.14	Cxadr	0.742762	5.83809	70.4751	8.3443e-09	6.153e-06	743.89	616.97	704.74	1054.82	1035.71	1096.11
	ENSMUSG00000037157.8	Il22ra1	1.10975	3.66949	70.3923	8.43774e-09	6.153e-06	141	133	114	228	272	272
	ENSMUSG00000056498.13	Tmem154	0.696056	6.23634	70.5574	8.25257e-09	6.153e-06	1004	939	843	1254	1364	1542
	ENSMUSG00000019997.11	Ccn2	-0.741713	7.02702	70.0545	8.83088e-09	6.35605e-06	2899.09	2516.68	2483.21	1246.18	1454.53	1658.93
	ENSMUSG00000032092.5	Mpzl2	0.768969	5.78611	68.627	1.0724e-08	7.61965e-06	768.44	610.25	600.06	909.93	1003.05	1191.02
	ENSMUSG00000021702.7	Thbs4	-0.74958	8.44125	67.0999	1.32449e-08	9.13263e-06	7083	6798	7154	3473	3844	4261
	ENSMUSG00000022440.9	C1qtnf6	-0.843311	4.67198	67.0444	1.33477e-08	9.13263e-06	539	546	489	251	262	296
	ENSMUSG00000029372.7	Ppbp	-2.23823	2.08678	74.1788	1.33086e-08	9.13263e-06	126	110	90	25	11	27
	ENSMUSG00000073602.10	Serpinb3b	0.756153	5.82002	66.5539	1.42957e-08	9.66197e-06	774.83	650	611	907.99	1027.75	1233
	ENSMUSG00000004655.5	Aqp1	-0.687165	8.02389	65.9062	1.56602e-08	1.04567e-05	5368	5328	4836	2859	3072	2958
	ENSMUSG00000048489.12	Depp1	-1.95719	1.72586	65.7846	1.59318e-08	1.05114e-05	86	85	71	21	18	18
	ENSMUSG00000091575.2	2010016I18Rik	1.04444	3.88168	65.3178	1.70223e-08	1.10987e-05	150.44	174.67	137.51	276.64	318.27	286.05
	ENSMUSG00000003469.9	Phyhip	0.846336	5.3292	68.1304	1.77372e-08	1.14304e-05	578	432	386	671	822	812
	ENSMUSG00000037188.7	Grhl3	0.745294	5.66811	64.7174	1.85446e-08	1.18134e-05	673	592	573	780	992	1074
	ENSMUSG00000037129.7	Tmprss13	0.925877	5.61787	80.5459	1.88313e-08	1.18597e-05	591	591	459	811	922	1141
	ENSMUSG00000056078.6	Lipm	1.27027	6.03509	128.701	2.01386e-08	1.25405e-05	656.86	634.92	567.94	1115.92	1324.13	1708.31
	ENSMUSG00000022123.9	Scel	0.724266	5.9136	62.1647	2.68699e-08	1.65462e-05	765	726	705	941	1099	1315
	ENSMUSG00000058454.15	Dhcr7	0.712763	6.23304	61.954	2.77187e-08	1.68813e-05	1051	926	789	1178	1412	1585
	ENSMUSG00000031502.11	Col4a1	-0.686421	7.95015	61.453	2.98551e-08	1.7753e-05	5437	5002	4353	2617	3095	2744
	ENSMUSG00000038453.17	Srcin1	0.836828	5.28944	65.0647	2.97822e-08	1.7753e-05	460.52	464.58	428.7	589.67	778.34	873.34
	ENSMUSG00000064023.4	Klk8	0.89668	5.69872	76.8955	3.0111e-08	1.7753e-05	638.51	660.6	461.01	871.71	1026.6	1117.86
	ENSMUSG00000020840.10	Blmh	0.684492	6.71845	61.2184	3.09161e-08	1.80358e-05	1403	1328	1181	1696	1876	2227
	ENSMUSG00000039217.13	Il18	0.905245	4.67112	61.0946	3.14921e-08	1.81805e-05	341	291	228	448	460	571
	ENSMUSG00000028989.3	Angptl7	-0.691272	7.27119	60.7352	3.32319e-08	1.89871e-05	3516	3183	2566	1579	1837	1857
	ENSMUSG00000023046.6	Igfbp6	-0.760053	5.20038	60.5979	3.39233e-08	1.91843e-05	855	739	642	348	415	452
	ENSMUSG00000031503.13	Col4a2	-0.692269	7.55573	60.2874	3.55454e-08	1.96996e-05	4167	3864	3244	2084	2327	1997
	ENSMUSG00000053765.4	Oas1f	0.717016	5.22044	60.335	3.52914e-08	1.96996e-05	503	464	398	633	748	684
	ENSMUSG00000038094.15	Atp13a4	1.83415	1.94618	60.1433	3.63267e-08	1.99333e-05	31	30	19	81	74	108
	ENSMUSG00000014303.13	Glis2	-0.735349	4.97106	59.6163	3.93445e-08	2.13776e-05	663.58	624.48	599.27	311.34	367.32	368.22
	ENSMUSG00000112963.1	Gm6093	-1.81474	2.58506	67.0156	4.06925e-08	2.18954e-05	165.13	130.37	144	53	32.48	29
	ENSMUSG00000020689.4	Itgb3	-0.695192	5.51543	58.6704	4.54626e-08	2.42267e-05	996	895	840	545	519	485
	ENSMUSG00000026107.11	Nabp1	0.721584	5.4802	58.5574	4.62592e-08	2.44165e-05	517	544	561	842	821	807
	ENSMUSG00000093996.2	Fam205a3	-7.19844	-0.43898	62.2294	4.7353e-08	2.4758e-05	21.84	16.58	17.72	0	0	0
	ENSMUSG00000006574.15	Slc4a1	-2.2209	1.53972	57.9178	5.10634e-08	2.57271e-05	78	89	52	8	16	19
	ENSMUSG00000028262.13	Clca3a2	0.751007	5.57834	59.0993	5.04137e-08	2.57271e-05	673.29	480.63	568.53	865.68	940.01	861.92
	ENSMUSG00000028749.7	Pla2g2f	0.833934	7.37103	69.2138	5.07059e-08	2.57271e-05	2176	2084	1525	2735	3174	3571
	ENSMUSG00000078202.3	Nrarp	0.667822	5.69914	58.0113	5.03286e-08	2.57271e-05	749	597	598	944	930	963
	ENSMUSG00000029070.9	Mxra8	-0.680915	6.54143	57.7557	5.23644e-08	2.59115e-05	1841.8	1842.71	1845.98	937	1026	1229.51
	ENSMUSG00000048721.2	Fndc9	1.03524	4.81149	72.8087	5.21636e-08	2.59115e-05	321	339	232	456	598	631
	ENSMUSG00000046623.8	Gjb4	0.809064	5.58605	64.6431	5.38943e-08	2.64326e-05	650	580	464	763	915	1054
	ENSMUSG00000004865.16	Srpk1	0.68961	7.58101	57.351	5.57717e-08	2.70702e-05	2547	2370	2181	2901	3749	3927
	ENSMUSG00000020363.6	Gfpt2	-0.623573	5.78654	57.3053	5.61713e-08	2.70702e-05	1166	1082	987	584	667	684
	ENSMUSG00000030218.2	Mgp	-0.831863	6.31404	71.6695	5.81823e-08	2.76263e-05	1787	1504	1629	706	836	1014
	ENSMUSG00000076617.9	Ighm	-0.701043	6.52776	57.8338	5.83222e-08	2.76263e-05	2084	1834	1619	1138	1017	964
	ENSMUSG00000026315.13	Serpinb8	0.67008	6.33982	56.9226	5.96413e-08	2.80117e-05	1125	1041	866	1273	1483	1688
	ENSMUSG00000029178.14	Klf3	0.684837	7.80421	56.8019	6.07835e-08	2.83082e-05	3165.88	2745.92	2411.8	3734.95	3934.85	4634.87
	ENSMUSG00000027848.12	Olfml3	-0.601567	6.78761	56.6582	6.21734e-08	2.87143e-05	2282	2150	2008	1243	1354	1313
	ENSMUSG00000053886.4	Sh2d4a	0.732475	5.12572	56.2503	6.63095e-08	3.03714e-05	449	440	379	574	626	743
	ENSMUSG00000044649.4	Krtap4-2	4.72966	0.423763	68.932	7.05826e-08	3.20636e-05	1	1	2	18	30	60
	ENSMUSG00000006342.15	Susd2	0.763328	6.33788	63.9594	7.25487e-08	3.26888e-05	1031	910	957	1236	1537	1780
	ENSMUSG00000025207.16	Sema4g	0.638396	6.0676	55.5178	7.45032e-08	3.30323e-05	911	855	773	1035	1262	1351
	ENSMUSG00000090338.2	Gm17081	-7.23696	-0.415302	59.0569	7.42025e-08	3.30323e-05	14.48	20	24.34	0	0	0
	ENSMUSG00000091376.1	Aadacl2	1.0941	3.83217	56.7428	7.62098e-08	3.35208e-05	182	149	109	271	257	333
	ENSMUSG00000040428.19	Plekha4	-0.782226	4.67444	55.1932	7.84771e-08	3.42463e-05	555	550	451	253	270	310
	ENSMUSG00000044244.18	Il20rb	0.612543	7.39661	54.4017	8.91604e-08	3.86044e-05	2302	2197	1955	2756	3219	3120
	ENSMUSG00000026034.17	Clk1	0.655585	7.59355	53.9057	9.66486e-08	4.15222e-05	2510	2301	2434	3061	3595	3904
	ENSMUSG00000001348.15	Acp5	-0.712511	5.61694	54.2325	9.77645e-08	4.16616e-05	1122.88	885	936.94	593.92	545.93	508.82
	ENSMUSG00000003665.7	Has1	-1.05743	3.32415	53.7909	9.84766e-08	4.16616e-05	238	212	195	90	100	95
	ENSMUSG00000053198.14	Prx	-0.775704	4.93532	53.5396	1.0261e-07	4.30812e-05	719	580.95	565	274	379	351
	ENSMUSG00000017969.13	Ptgis	-0.833363	4.33063	53.4577	1.03996e-07	4.33352e-05	456.5	379.13	401.62	203.39	201	236
	ENSMUSG00000035239.6	Neu3	1.09784	3.24226	53.3277	1.06242e-07	4.39404e-05	107	88	94	170	189	212
	ENSMUSG00000078899.9	Gm4631	0.830614	4.6222	53.2064	1.08381e-07	4.44934e-05	298.77	269.94	284.76	381.7	472.99	550.51
	ENSMUSG00000044345.9	Marveld1	-0.60183	6.91775	53.1327	1.09705e-07	4.47057e-05	2595	2305	2158	1273	1492	1521
	ENSMUSG00000029718.14	Pcolce	-0.63097	7.42638	53.0771	1.10714e-07	4.47873e-05	3706	3342	3078	1770	2008	2250
	ENSMUSG00000031284.16	Pak3	0.862823	4.16729	53.0128	1.11895e-07	4.4937e-05	213	211	190	303	333	395
	ENSMUSG00000027901.12	Dennd2d	0.641996	5.48236	52.8554	1.14842e-07	4.54619e-05	628.04	553.3	508.86	716.09	876.74	836.55
	ENSMUSG00000029096.15	Htra3	-0.67327	6.11523	53.2385	1.14298e-07	4.54619e-05	1449	1396	1272	666	772	947
	ENSMUSG00000048399.4	Tprg	0.848327	4.42412	52.3309	1.25284e-07	4.88968e-05	279	267	196	356	420	453
	ENSMUSG00000069808.13	Fam57a	0.599732	6.64885	52.3532	1.2482e-07	4.88968e-05	1412.04	1272.17	1179.85	1616.13	1791.13	1990.19
	ENSMUSG00000026837.16	Col5a1	-0.815056	7.79213	63.0327	1.29009e-07	4.99986e-05	4644.95	4545.88	4459.89	1991.97	2273.97	2918.97
	ENSMUSG00000004098.7	Col5a3	-0.652288	6.45592	51.9884	1.32652e-07	5.10533e-05	1824	1845	1523	836	1074	1140
	ENSMUSG00000028572.13	Hook1	0.815645	4.47536	51.8296	1.36227e-07	5.18513e-05	266.73	271	239	368	401	493.95
	ENSMUSG00000066677.12	Ifi208	-4.63277	5.04971	414.659	1.36596e-07	5.18513e-05	1151.76	1187.17	736.67	46.39	30.52	36.15
	ENSMUSG00000048583.16	Igf2	-1.1216	4.63191	72.5437	1.39981e-07	5.27747e-05	573	477.05	579	196	209.92	287
	ENSMUSG00000048251.15	Bcl11b	0.586177	6.23087	51.5509	1.42751e-07	5.34556e-05	1057	944	905	1230	1320	1471
	ENSMUSG00000034463.4	Scara3	-0.635024	6.71495	51.1112	1.53742e-07	5.71848e-05	2177	1933	2060	1061	1217	1396
	ENSMUSG00000056569.11	Mpz	-1.17939	6.29338	106.158	1.57056e-07	5.76436e-05	1970	1513	1772	604	684	856
	ENSMUSG00000102813.1	Gm37795	0.751065	4.53291	50.9999	1.56669e-07	5.76436e-05	291	263	277	404	433	454
	ENSMUSG00000036062.13	Phf24	0.968758	3.79457	50.7471	1.63536e-07	5.96273e-05	175	154	124	236	262	318
	ENSMUSG00000036545.9	Adamts2	-0.903088	6.39361	75.3767	1.66597e-07	6.03461e-05	1812	1648	1820	699	895	1024
	ENSMUSG00000069717.7	Gm11568	7.02717	0.974128	98.4378	1.74482e-07	6.27919e-05	0	1.38	0	31.68	44.54	91.37
	ENSMUSG00000026478.14	Lamc1	-0.594217	7.91718	50.114	1.82209e-07	6.51499e-05	4919	4672	4472	2631	2971	2994
	ENSMUSG00000039349.5	C130074G19Rik	-0.683406	5.09821	50.0759	1.83402e-07	6.5156e-05	681	655	693	360	384	424
	ENSMUSG00000008601.12	Rab25	0.648045	6.42395	50.251	1.8491e-07	6.52731e-05	1256	1122	873	1372	1594	1715
	ENSMUSG00000022512.3	Cldn1	0.69793	6.96187	53.3145	2.00509e-07	7.03315e-05	1775	1503	1338	2012	2161	2718
	ENSMUSG00000056481.7	Cd248	-0.596201	6.10074	49.5018	2.02466e-07	7.05716e-05	1420	1300	1270	710	813	914
	ENSMUSG00000067006.12	Serpinb5	0.700484	8.34505	50.1344	2.06637e-07	7.15751e-05	4740	3907	3400	5227	5801	6969
	ENSMUSG00000064165.8	Krt39	4.15499	0.411769	60.1937	2.16375e-07	7.44826e-05	3	2	1	21	24	60
	ENSMUSG00000026822.14	Lcn2	-1.08243	4.427	63.9499	2.20427e-07	7.54093e-05	553	483	374	232	202	174
	ENSMUSG00000005148.8	Klf5	0.639633	6.75479	48.9603	2.22419e-07	7.56237e-05	1558	1262	1272	1676	1938	2265
	ENSMUSG00000104350.1	Gm38244	1.65837	2.03895	48.8877	2.2525e-07	7.61195e-05	29	24	40	83	80	110
	ENSMUSG00000035783.9	Acta2	-0.589575	5.94598	48.7169	2.32068e-07	7.79482e-05	1251	1115	1205	687	724	780
	ENSMUSG00000000248.16	Clec2g	1.10046	3.35036	48.657	2.34515e-07	7.79598e-05	106	107	98	154	218	246
	ENSMUSG00000025885.18	Myo5b	0.959958	3.91596	48.6157	2.36215e-07	7.79598e-05	178	173	143	229	300	359
	ENSMUSG00000070305.10	Mpzl3	0.84996	5.1254	57.7802	2.36323e-07	7.79598e-05	440	444	323	562	655.96	786
	ENSMUSG00000087263.1	Gm15726	2.02142	1.19965	48.54	2.39368e-07	7.84972e-05	13.56	18.89	9.08	47.5	54.56	55.17
	ENSMUSG00000018166.8	Erbb3	0.596655	6.89477	48.4373	2.43718e-07	7.94535e-05	1735	1452	1405	1855	2240	2305
	ENSMUSG00000025907.14	Rb1cc1	0.632513	5.82664	48.0511	2.60853e-07	8.31114e-05	736	724	689.39	930.44	945.84	1201
	ENSMUSG00000028211.11	Trp53inp1	0.662575	5.3418	48.1186	2.57766e-07	8.31114e-05	579	462	478	728	678	805
	ENSMUSG00000072601.4	Ear1	-2.87385	0.271503	48.0606	2.6042e-07	8.31114e-05	30.62	31	28.22	4.08	2.13	5
	ENSMUSG00000079013.2	Serpina3j	-0.589233	7.90455	48.0493	2.60937e-07	8.31114e-05	4691	4712	4502	2646	2989	2901
	ENSMUSG00000043068.6	Fam89a	1.07874	3.36625	47.9704	2.64598e-07	8.3796e-05	117	120	82	170	217	234
	ENSMUSG00000110537.1	Gm4316	0.89892	3.75727	47.807	2.72356e-07	8.57626e-05	155.26	163.12	136	250.75	282.24	246.52
	ENSMUSG00000001119.7	Col6a1	-0.670249	8.1923	47.6418	2.80449e-07	8.73283e-05	5913	5887	5562	2822	3273	4002
	ENSMUSG00000021696.9	Elovl7	0.781818	6.72513	60.5859	2.82055e-07	8.73283e-05	1489	1225	1067	1684	1951	2346
	ENSMUSG00000023918.12	Adgrf4	0.751002	6.14541	57.9961	2.82046e-07	8.73283e-05	1001	869	694	1137	1303	1527
	ENSMUSG00000061928.6	Dsg1b	0.95484	6.73701	77.451	2.8427e-07	8.75252e-05	1194.67	1166.05	1146.42	1723.71	1987.51	2583.74
	ENSMUSG00000037469.10	Acp7	1.66367	3.04504	65.9513	2.98638e-07	9.14409e-05	78.78	70.32	41.83	146	170.95	240.39
	ENSMUSG00000028236.3	Sdr16c5	0.585231	6.50716	47.0911	3.09353e-07	9.42013e-05	1329	1107	1089	1447	1611	1815
	ENSMUSG00000059898.9	Dsc3	0.65449	9.34614	46.9452	3.17539e-07	9.61657e-05	8902	7693	7886	10619	11313	13632
	ENSMUSG00000020241.13	Col6a2	-0.653725	7.88734	46.8481	3.2312e-07	9.68534e-05	4877	4686	4437	2359	2590	3276
	ENSMUSG00000024206.15	Rfx2	-0.761048	4.8156	46.8449	3.23305e-07	9.68534e-05	665	606	443	277	340	311
	ENSMUSG00000020473.13	Aebp1	-0.576804	7.17093	46.5358	3.41783e-07	9.96945e-05	2984	2887	2484	1644	1860	1650
	ENSMUSG00000027397.14	Slc20a1	-0.561886	6.31365	46.5637	3.40069e-07	9.96945e-05	1593.67	1596.55	1393.43	912.96	1032.76	914.37
	ENSMUSG00000031757.7	Mt4	0.67872	7.13299	49.8544	3.39062e-07	9.96945e-05	1863	1939	1435	2248	2536	2936
	ENSMUSG00000042254.14	Cilp	-0.954455	7.81766	72.7428	3.36969e-07	9.96945e-05	5150	4744	4509	1905	2098	2866
	ENSMUSG00000051251.3	Nhlh1	1.65483	1.6508	46.6467	3.35025e-07	9.96945e-05	27	24	20	55	74	78
	ENSMUSG00000005339.10	Fcer1a	1.42373	2.043	46.4658	3.46129e-07	0.000100434	41	34	31	85	90	87
	ENSMUSG00000032232.14	Cgnl1	-0.591665	6.63077	46.3499	3.53447e-07	0.000102023	1953	1977	1823	1006	1193	1331
	ENSMUSG00000034317.14	Trim59	0.735003	4.7021	46.2563	3.59481e-07	0.000102695	333	285	323	457	450	539
	ENSMUSG00000116953.1	9030025P20Rik	0.709387	4.79378	46.2668	3.58798e-07	0.000102695	344.96	313.73	353.91	463.59	556.92	510.68
	ENSMUSG00000022548.14	Apod	-0.655457	8.94016	46.1905	3.63788e-07	0.000103166	10665	10107	8386	4879	5628	6551
	ENSMUSG00000030116.14	Mfap5	-0.639514	5.51062	46.1744	3.64854e-07	0.000103166	905	865	903	457	524	607
	ENSMUSG00000049848.7	Ceacam19	0.731204	5.17943	47.9562	3.72472e-07	0.000104397	464	480	374	558	668	793
	ENSMUSG00000066704.6	Cyp2b19	0.732195	8.57998	50.7372	3.74858e-07	0.000104397	4821	4853.9	4247.88	5611.96	7434.98	8356.93
	ENSMUSG00000079018.10	Ly6c1	-0.605719	8.51523	46.0307	3.74487e-07	0.000104397	7946.05	7378.16	6110.79	4253.37	4382.53	4293.18
	ENSMUSG00000027408.7	Cpxm1	-0.783873	4.37788	45.6782	3.99301e-07	0.000109553	428	483	354	216	235	225
	ENSMUSG00000032462.14	Pik3cb	0.577255	5.53121	45.7227	3.96072e-07	0.000109553	637.87	604.62	550.62	761.6	816.93	888.17
	ENSMUSG00000052234.2	Epx	-2.32077	0.786758	45.6863	3.98712e-07	0.000109553	55	37	35	8	5	10
	ENSMUSG00000018593.13	Sparc	-0.998703	10.3128	69.1502	4.03412e-07	0.000110135	26579	24933	30105	11168	11766	14987
	ENSMUSG00000048766.6	Skint10	1.40327	2.54071	45.5456	4.09091e-07	0.000111139	63	56	34	107	110	155
	ENSMUSG00000022483.17	Col2a1	-1.15523	3.03475	45.4975	4.12709e-07	0.000111574	186	176	174	86	59	76
	ENSMUSG00000028654.13	Mycl	0.582715	6.26801	45.4657	4.15117e-07	0.000111681	1093	953	940	1169	1411	1549
	ENSMUSG00000017679.16	Ttpal	0.609108	6.54572	45.3828	4.21467e-07	0.000112841	1255	1249	1077	1423	1656	1965
	ENSMUSG00000071281.12	Zfp65	0.856152	3.90406	45.2562	4.31365e-07	0.000114936	171	158	182	260	301	295
	ENSMUSG00000022297.15	Fzd6	0.597834	5.80399	45.1116	4.4299e-07	0.000117469	754.65	678	713	895	965	1141
	ENSMUSG00000032261.16	Sh3bgrl2	0.62543	5.3413	45.0457	4.48389e-07	0.000118334	573	507	463	638	726	830
	ENSMUSG00000046410.10	Kcnk6	0.587094	5.76446	44.9804	4.53817e-07	0.000119199	769	754	583	910	1010	988
	ENSMUSG00000018217.12	Pmp22	-0.62084	7.3426	44.891	4.61367e-07	0.00012061	3395	2974	3137	1679	1806	2227
	ENSMUSG00000078598.11	Skint5	1.36189	2.3635	44.4981	4.96176e-07	0.000129101	49	47	41	84	105	137
	ENSMUSG00000043029.2	Trpv3	0.709899	5.3341	47.281	5.20273e-07	0.000134739	549	484	448	598	751	888
	ENSMUSG00000026043.18	Col3a1	-0.735173	10.4782	47.0915	5.36993e-07	0.000138422	27167	28876	29833.1	14353	14712	18768
	ENSMUSG00000004562.16	Arhgef40	-0.594953	5.50182	43.8914	5.55611e-07	0.000142558	890.06	854.47	881.03	478.62	538.07	590.34
	ENSMUSG00000025665.16	Rps6ka6	1.22283	2.91901	43.7449	5.71086e-07	0.000145853	73	82	62	117	149	203
	ENSMUSG00000032315.6	Cyp1a1	-1.13575	2.80885	43.7069	5.75179e-07	0.00014607	151	163	141	56	74	61
	ENSMUSG00000038463.8	Olfml2b	-0.593032	5.99485	43.6882	5.77205e-07	0.00014607	1236	1188	1269	703	710	851
	ENSMUSG00000031740.8	Mmp2	-0.79278	7.8271	56.2069	5.84243e-07	0.000147179	4632	4433	4818	2020	2476	2941
	ENSMUSG00000031431.13	Tsc22d3	-0.562451	6.87092	43.5043	5.97526e-07	0.000149844	2535	2061	2159	1273	1422	1521
	ENSMUSG00000041995.8	Zbed3	-0.892426	3.54252	43.0229	6.54464e-07	0.000163383	272	228	224	109	125	125
	ENSMUSG00000033191.14	Tie1	-0.683853	5.04866	42.9435	6.64411e-07	0.000165122	686	643	635	377	426	323
	ENSMUSG00000026097.9	Ormdl1	0.843389	3.82036	42.863	6.74654e-07	0.00016692	170	160	156	260	244	300
	ENSMUSG00000020902.12	Ntn1	-0.578015	6.87609	42.7176	6.93603e-07	0.000169706	2486	2357	1975	1191	1453	1566
	ENSMUSG00000021054.6	Sgpp1	0.636308	7.018	44.7581	6.95102e-07	0.000169706	1834	1661	1428	2020	2233	2797
	ENSMUSG00000026989.5	Dapl1	0.716827	6.34624	52.7979	6.89311e-07	0.000169706	1081	1038	864	1196	1587	1744
	ENSMUSG00000022836.11	Mylk	-0.604214	5.73834	42.5471	7.16549e-07	0.000174175	1027.63	1002.76	1067.72	548.85	621.84	716.67
	ENSMUSG00000028517.8	Plpp3	-0.552893	7.60894	42.4935	7.23932e-07	0.000175201	3974	3875	3392	2156	2338	2568
	ENSMUSG00000029869.7	Ephb6	0.56488	6.9071	42.4156	7.34806e-07	0.000176293	1795	1589	1318	1920	2278	2195
	ENSMUSG00000078262.5	Krtap4-9	5.66119	0.448054	66.8757	7.31804e-07	0.000176293	0	1	1	22	25	65
	ENSMUSG00000000157.16	Itgb2l	-2.0913	0.867348	42.369	7.41399e-07	0.000177108	53	33	45	10	9	9
	ENSMUSG00000024620.11	Pdgfrb	-0.535873	6.19023	42.3458	7.447e-07	0.000177133	1482	1449	1249	786	951	921
	ENSMUSG00000071531.3	Gprin2	0.711044	4.80059	42.2544	7.57873e-07	0.000179496	325	355	337	440	502	600
	ENSMUSG00000028488.15	Sh3gl2	0.998655	3.54357	42.1891	7.67438e-07	0.000180988	127	144	103	175	251	265
	ENSMUSG00000024486.6	Hbegf	-0.678301	4.78628	41.9915	7.97191e-07	0.000187208	625	525	489	272	356	315
	ENSMUSG00000045109.6	Krtap4-7	4.9056	1.76411	105.377	8.08915e-07	0.000188973	2	3	5	49	102	139
	ENSMUSG00000046259.2	Sprr2h	2.74551	2.66633	92.9105	8.11526e-07	0.000188973	31	30	18	119	133	239
	ENSMUSG00000100975.2	Gm28875	-0.721824	4.77335	41.8209	8.23881e-07	0.000191047	582	615	446	297	339	279
	ENSMUSG00000033174.17	Mgll	-0.561789	7.93435	41.7832	8.299e-07	0.000191641	4901	4766	4438	2591	3234	3000
	ENSMUSG00000002797.9	Ggct	1.11084	6.11024	87.5021	8.53601e-07	0.000195638	774	742	604	1124	1377	1725
	ENSMUSG00000027074.14	Slc43a3	-0.551104	5.60447	41.6125	8.57796e-07	0.000195638	949	965	875	560	622	573
	ENSMUSG00000034574.10	Daam1	0.567605	6.80073	41.6165	8.57129e-07	0.000195638	1527	1454	1364	1682	1994	2275
	ENSMUSG00000028073.15	Pear1	-0.684086	4.71441	41.5205	8.73242e-07	0.000198281	537.39	555.02	466.24	268.27	341	285
	ENSMUSG00000045193.13	Cirbp	-0.593507	6.28557	41.9261	8.76544e-07	0.000198281	1817	1526	1217	848	988	935
	ENSMUSG00000022555.12	Dgat1	-0.629608	5.42882	41.3455	9.03461e-07	0.000203539	921	882	727	451	590	464
	ENSMUSG00000075567.4	Krtap1-4	4.59791	-0.0257395	49.5001	9.26377e-07	0.000207857	1	1	1	10	22	44.16
	ENSMUSG00000034675.17	Dbn1	-0.739431	4.1625	41.127	9.42805e-07	0.00021069	377	367	331	173	214	207
	ENSMUSG00000041734.15	Kirrel	-0.529386	6.36962	41.0568	9.55831e-07	0.000212158	1649	1674	1402	919	1003	1095
	ENSMUSG00000108022.1	Gm7298	-0.591816	5.79249	41.0504	9.57027e-07	0.000212158	1076.98	1184.99	955	634	730	602
	ENSMUSG00000032018.14	Sc5d	0.802455	5.43653	53.5172	9.82029e-07	0.000216779	532	484	507	674	779	1006
	ENSMUSG00000039221.10	Rpl22l1	0.546891	6.04435	40.8996	9.85697e-07	0.000216779	961.88	828	806.13	1124.42	1082.24	1284.46
	ENSMUSG00000030510.11	Cers3	1.01937	4.45467	55.3017	9.96739e-07	0.000218341	283	208	210	337	441	533
	ENSMUSG00000001918.17	Slc1a5	-0.520734	6.54983	40.8221	1.0008e-06	0.000218368	1888	1770	1679	1032	1251	1149
	ENSMUSG00000028467.15	Gba2	0.631559	5.17911	40.7309	1.01889e-06	0.000220671	480.22	512.42	383	589.77	652.42	719.89
	ENSMUSG00000104559.1	Gm43118	-0.901439	3.55933	40.7288	1.01932e-06	0.000220671	255.85	246.48	231.48	105.77	144.16	112.04
	ENSMUSG00000113450.1	Gm49359	0.770658	4.06175	40.5964	1.04621e-06	0.000225612	195.7	201.93	194.94	315.82	289.95	326.91
	ENSMUSG00000031145.15	Prickle3	0.54101	5.77269	40.5018	1.06592e-06	0.000228087	755.18	702.79	692.85	845.79	1052.76	992.33
	ENSMUSG00000103523.1	2210017I01Rik	2.09972	2.9347	76.1259	1.06448e-06	0.000228087	44	66	29	157	165	228
	ENSMUSG00000067924.4	Rtl8b	-0.690541	4.39894	40.4229	1.08264e-06	0.000230773	455.2	395.65	400.67	220.57	234.83	259.14
	ENSMUSG00000044551.13	9930012K11Rik	0.951936	3.46408	40.3539	1.09751e-06	0.000233046	136	126	100	171	224	251
	ENSMUSG00000044252.18	Osbpl1a	0.572824	6.14722	40.3183	1.10526e-06	0.000233795	953	952.02	849.99	1051.82	1270.63	1464.89
	ENSMUSG00000021867.16	Tmem254b	-0.623332	5.50289	40.4036	1.12294e-06	0.000236633	941.67	936.7	778.39	444.76	627.86	518.12
	ENSMUSG00000052914.4	Cyp2j6	0.597427	5.35337	40.213	1.12855e-06	0.000236915	584	531	460	674	685	834
	ENSMUSG00000032561.15	Acpp	0.586087	7.06064	40.1879	1.13418e-06	0.000237198	1928	1676	1570	2013	2347	2805
	ENSMUSG00000045411.16	2410002F23Rik	-0.515318	6.50749	40.0986	1.15444e-06	0.000240528	1859.94	1750	1569.93	994	1140.65	1206.16
	ENSMUSG00000027171.10	Prrg4	1.02117	3.2436	39.9674	1.18494e-06	0.000245957	102	92	105	161	169	232
	ENSMUSG00000071076.6	Jund	-0.581181	6.22834	40.1547	1.19861e-06	0.000247866	1545.1	1581.84	1225.09	749.14	936.22	996.79
	ENSMUSG00000054889.10	Dsp	0.638387	11.4765	39.8793	1.20591e-06	0.000248449	38671	36274	33063	42420.9	54241.9	58689
	ENSMUSG00000110404.1	Rnf223	1.43473	2.53609	43.3835	1.21389e-06	0.000249168	61	56	33	88	133	153
	ENSMUSG00000029134.14	Plb1	1.508	2.87824	51.2901	1.26289e-06	0.000257319	62	69	52	106	161	216
	ENSMUSG00000116207.1	Nnt	1.17732	3.94644	55.174	1.26286e-06	0.000257319	160.51	127.29	166.09	241.64	317.07	393.78
	ENSMUSG00000029026.16	Trp73	0.636904	4.74559	39.5135	1.29734e-06	0.00026337	371	313	329	469	511	471
	ENSMUSG00000085786.1	Gm15987	0.687868	4.32719	39.4316	1.31881e-06	0.000266752	256	242	242	362	363	374
	ENSMUSG00000031877.9	Ces2g	0.862547	6.91587	61.6561	1.34488e-06	0.000271035	1504	1421	1228	1910	2188.8	2872
	ENSMUSG00000031351.15	Zfp185	0.758481	6.97254	52.7136	1.37306e-06	0.000275711	1620	1477	1419	1862	2357	2849
	ENSMUSG00000022468.12	Endou	0.572506	5.78055	39.052	1.42352e-06	0.000284812	807	709	626	863	934	1136
	ENSMUSG00000033102.15	Cdc14b	0.635478	5.15664	39.0051	1.43707e-06	0.000286348	479	499	374	578	622	734
	ENSMUSG00000117011.1	E130008D07Rik	1.15518	2.54072	38.9898	1.44153e-06	0.000286348	67	53	52	107	135	111
	ENSMUSG00000032194.9	Kank2	-0.508755	6.31232	38.9503	1.45307e-06	0.000287223	1561	1609	1343	900	1018	1005
	ENSMUSG00000071005.7	Ccl19	-1.19704	2.41273	38.9393	1.4563e-06	0.000287223	122.6	113.9	111.03	38.25	53.39	48.91
	ENSMUSG00000020953.17	Coch	-0.874554	8.04356	59.092	1.4673e-06	0.000288367	5688	5002	5781	2494	2474	3348
	ENSMUSG00000031538.6	Plat	-0.549383	5.31288	38.8088	1.4953e-06	0.00029283	791	790	697	442	490	503
	ENSMUSG00000024975.13	Pdcd4	0.656349	6.48904	45.2739	1.51109e-06	0.00029488	1211	1154	1012	1311	1665	1942
	ENSMUSG00000002057.4	Foxn1	0.903724	4.61356	48.9752	1.54064e-06	0.000298989	314	273	238	362	479	584
	ENSMUSG00000028039.11	Efna3	0.565214	6.14859	38.6542	1.54293e-06	0.000298989	1079.23	935.37	764.98	1087.41	1302.07	1392.04
	ENSMUSG00000037060.3	Cavin3	-0.508665	5.81717	38.618	1.55434e-06	0.000300149	1166.52	1053.75	979.6	653.72	733.33	683.78
	ENSMUSG00000002233.13	Rhoc	-0.579656	5.66269	38.575	1.56798e-06	0.000301732	1121	987	832	619	635	549
	ENSMUSG00000037058.16	Paip2	0.522604	6.84317	38.5411	1.57882e-06	0.000302768	1599	1461	1494	1857	1957	2226
	ENSMUSG00000074280.6	Gm6166	0.743748	5.06494	43.8593	1.61031e-06	0.000307742	486.41	406.44	322.96	528.54	614.62	726.2
	ENSMUSG00000048482.14	Bdnf	1.35184	1.96615	38.4134	1.62047e-06	0.000308618	42	32	30	69	82	94
	ENSMUSG00000035834.11	Polr3g	0.793928	5.25797	49.2697	1.66867e-06	0.00031671	528	440	389	618	664	884
	ENSMUSG00000057337.13	Chst3	0.645694	5.45111	40.6137	1.7119e-06	0.000323807	580	479	585	674	835	873
	ENSMUSG00000043230.2	Fam124b	1.60219	1.87232	38.8311	1.72384e-06	0.000324955	22	30	33	75	59	106
	ENSMUSG00000039911.13	Spsb1	-0.620944	4.81184	38.0916	1.73067e-06	0.000325137	619	560	465	310	328	344
	ENSMUSG00000023018.5	Smarcd1	-0.614456	5.1425	37.9274	1.79e-06	0.000334019	787.92	697.97	580.9	416	442.95	378.92
	ENSMUSG00000055435.6	Maf	0.507184	7.49425	37.9303	1.78895e-06	0.000334019	2619.56	2363.06	2230.06	3018.2	3141.05	3278.48
	ENSMUSG00000037379.7	Spon2	-0.69662	4.33808	37.8901	1.80378e-06	0.000335461	402	395	402	203	226	255
	ENSMUSG00000023034.7	Nr4a1	-0.747311	5.05123	43.549	1.81308e-06	0.000336063	730	722	556	289	384	430
	ENSMUSG00000034320.14	Slc26a2	0.52925	6.55095	37.8183	1.83064e-06	0.000338186	1333	1159	1218	1452	1641	1853
	ENSMUSG00000023991.16	Foxp4	-0.583491	5.57618	37.6735	1.8861e-06	0.000343848	1106	879	789	526	632	541
	ENSMUSG00000027276.7	Jag1	0.558698	6.59051	37.689	1.88009e-06	0.000343848	1409	1195	1171	1432	1709	1991
	ENSMUSG00000028386.1	Slc46a2	1.23868	4.07377	59.4325	1.87565e-06	0.000343848	186	174	125	258	365	433
	ENSMUSG00000060201.5	Spink7	1.8631	1.21191	37.689	1.88009e-06	0.000343848	12	21	13	39	47	70
	ENSMUSG00000028776.14	Tinagl1	-0.652014	4.843	37.628	1.90391e-06	0.000345956	618	540	532	302	389	300
	ENSMUSG00000057098.14	Ebf1	-0.61101	4.91128	37.5909	1.91858e-06	0.000347483	583	570	594	332	343	382
	ENSMUSG00000011034.6	Slc5a1	0.711092	4.59885	37.5549	1.93292e-06	0.000348939	347	319	225	416	436	486
	ENSMUSG00000020717.19	Pecam1	-0.518622	6.88787	37.3821	2.00333e-06	0.000360476	2319	2201	2214	1442	1527	1364
	ENSMUSG00000019846.11	Lama4	-0.500835	6.46908	37.3205	2.0291e-06	0.000362757	1672	1660	1673	1015	1134	1120
	ENSMUSG00000034607.6	Pof1b	1.35721	7.0536	102.966	2.02795e-06	0.000362757	1323	1247	1048	2428	2509	3609
	ENSMUSG00000087692.1	Gm11940	0.849178	3.50678	37.2301	2.06759e-06	0.000368451	147.54	119.67	121.72	187.55	227.74	231.84
	ENSMUSG00000006360.11	Crip1	-0.525762	7.65618	37.1988	2.08109e-06	0.000369667	3908	3886	3707	2318	2689	2366
	ENSMUSG00000024331.11	Dsc2	1.10245	3.10015	38.1754	2.09226e-06	0.000370463	79	93	88	126	173	220
	ENSMUSG00000019866.15	Crybg1	0.512633	8.08243	37.0307	2.15526e-06	0.000380404	3858	3672.92	3289.97	4414.94	4841.92	4964.96
	ENSMUSG00000007603.9	Dus3l	-0.54468	5.4659	36.9335	2.19948e-06	0.000386976	919	877	739	510	580	508
	ENSMUSG00000057969.15	Sema3b	-0.808773	3.95734	36.8944	2.21752e-06	0.000388915	329	296	321	131	171	198
	ENSMUSG00000020788.15	Atp2a3	-0.611817	5.87546	40.114	2.24201e-06	0.000390677	1205	1226	1000	741	714	605
	ENSMUSG00000032091.15	Tmprss4	0.500451	6.01721	36.8235	2.25066e-06	0.000390677	933.99	859.97	800.67	1052.23	1236.68	1093.24
	ENSMUSG00000045319.13	Proser2	1.21364	2.48317	36.8318	2.24674e-06	0.000390677	50	61	49	91	109	144
	ENSMUSG00000103105.5	Gm18752	-4.90428	-0.714055	36.8127	2.25577e-06	0.000390677	17.3	17.99	8.79	0	1.4	0
	ENSMUSG00000037434.7	Slc30a1	0.547581	5.85167	36.7446	2.28819e-06	0.000395058	872.79	760.21	643.41	885.73	1027.02	1148.44
	ENSMUSG00000023224.12	Serping1	-0.540976	9.2701	36.6774	2.32063e-06	0.000396833	12950	12055	10488	6949	7506	7995
	ENSMUSG00000030303.15	Far2	-0.503403	7.72463	36.6876	2.31569e-06	0.000396833	4216.75	3935.07	3841.81	2426.09	2718.18	2661.2
	ENSMUSG00000042429.8	Adora1	-1.06747	2.78299	36.6641	2.32711e-06	0.000396833	151.56	163.66	125.15	70.72	63.01	58.8
	ENSMUSG00000056427.10	Slit3	-0.631106	5.18731	36.882	2.32024e-06	0.000396833	711	677	740	343	469	462
	ENSMUSG00000032997.16	Chpf	-0.663171	4.40636	36.5865	2.36535e-06	0.000402117	478	397	377	243	238	245
	ENSMUSG00000015619.10	Gata3	0.557552	5.92175	36.5546	2.38128e-06	0.000403587	897	693	782	924	1108	1191
	ENSMUSG00000017493.12	Igfbp4	-0.540849	7.70157	36.4293	2.44496e-06	0.000413116	4404	3908	3643	2343	2348	2875
	ENSMUSG00000040732.20	Erg	-0.69409	4.64163	36.41	2.45493e-06	0.00041354	562	510	417	301	298	244
	ENSMUSG00000005397.8	Nid1	-0.501072	7.50299	36.3831	2.46888e-06	0.00041417	3576.96	3365.99	3329.99	2110.99	2226	2359.99
	ENSMUSG00000044359.1	P2ry4	1.96339	0.658224	36.374	2.47362e-06	0.00041417	12	10	7	32	35	38
	ENSMUSG00000018819.10	Lsp1	-0.648465	7.88202	40.8217	2.5183e-06	0.000420382	4842	4863	4235	2769	3103	2306
	ENSMUSG00000018339.11	Gpx3	-0.61286	7.82082	38.4831	2.55205e-06	0.000424478	4977	4435	3855	2182	2664	3153
	ENSMUSG00000029385.14	Ccng2	0.635907	5.08017	36.2007	2.56582e-06	0.000424478	432	376	466	600	576	654
	ENSMUSG00000039092.9	Sptlc3	0.552965	5.41358	36.2129	2.55922e-06	0.000424478	590	555	524	656	743	862
	ENSMUSG00000048775.10	Serpinb13	1.25767	2.40724	35.9978	2.67858e-06	0.000441814	52	60	37	88	103	138
	ENSMUSG00000019851.8	Perp	0.642802	10.4195	37.0066	2.71711e-06	0.000444203	20535	17470	14059	21862	23970	28812
	ENSMUSG00000037406.7	Htra4	-0.584732	5.33348	35.9525	2.70448e-06	0.000444203	891	691.94	752.75	419	540.45	476.66
	ENSMUSG00000044626.13	Liph	1.18816	2.41869	35.9409	2.71113e-06	0.000444203	53	57	45	83	117	127
	ENSMUSG00000005251.15	Ripk4	0.58514	5.71071	36.9595	2.73015e-06	0.000445022	808	694	534	837	1004	962
	ENSMUSG00000022754.6	Tmem45a	0.561897	7.45755	35.8924	2.73921e-06	0.00044519	2680	2257	1961	2933	2867	3549
	ENSMUSG00000017737.2	Mmp9	-1.3801	5.77887	100.959	2.74787e-06	0.000445292	1558	1030	1248	486	422	443
	ENSMUSG00000028339.17	Col15a1	-0.583579	5.49905	35.82	2.78174e-06	0.000449466	869	785	952	500	569	541
	ENSMUSG00000089715.12	Cbx6	-0.551811	5.37784	35.7911	2.79894e-06	0.00045093	862	762	761	446.97	483	571
	ENSMUSG00000026638.15	Irf6	0.523554	7.23889	35.7501	2.82351e-06	0.00045357	2277	1891.95	1839.94	2385	2597	2972.95
	ENSMUSG00000050954.15	Zfp169	0.949351	3.36547	35.7057	2.85036e-06	0.00045656	113	96	127	168	198	236
	ENSMUSG00000029163.9	Emilin1	-0.524236	5.47716	35.6355	2.89336e-06	0.000460089	928	861	751	521	581	522
	ENSMUSG00000041842.15	Fhdc1	0.566633	5.59483	35.6158	2.9056e-06	0.000460089	706	611	569	697	912	969
	ENSMUSG00000044921.5	Rassf9	0.726764	4.19198	35.6241	2.90041e-06	0.000460089	210	208	242	310	348	354
	ENSMUSG00000062210.13	Tnfaip8	0.521515	6.29705	35.6332	2.89482e-06	0.000460089	1214.99	1054	866.85	1384.99	1349.51	1389.58
	ENSMUSG00000028786.15	Tmem54	0.720728	4.3485	35.5719	2.93299e-06	0.000463104	291	241	212	333	348	447
	ENSMUSG00000032015.16	Pou2f3	0.505477	5.88427	35.4846	2.98828e-06	0.000470493	835	770	754	901	1044	1148
	ENSMUSG00000062400.3	Krtap6-5	5.13541	2.70788	140.651	3.0249e-06	0.000474909	5	7	5	106.01	187.37	274.53
	ENSMUSG00000052974.8	Cyp2f2	-0.586773	4.91958	35.3395	3.08268e-06	0.000479902	618.94	594.87	536.77	322.86	346.9	404.95
	ENSMUSG00000057719.11	Sh3rf2	0.552275	6.57936	35.7914	3.08068e-06	0.000479902	1325	1191	1231	1407	1691	1986
	ENSMUSG00000104213.5	Ighd	-1.04947	2.95272	35.3602	3.06904e-06	0.000479902	221	145	132	68	78	74
	ENSMUSG00000019539.11	Rcn3	-0.561593	5.15487	35.3157	3.0985e-06	0.000481013	693	662	688	380	439	461
	ENSMUSG00000035105.5	Egln3	0.661431	6.42903	43.7263	3.1237e-06	0.000483571	1213	1130	897	1380	1465	1870
	ENSMUSG00000038668.14	Lpar1	-0.562848	5.69681	35.0991	3.24634e-06	0.000499765	1029	1058	900	533	595	739
	ENSMUSG00000045092.8	S1pr1	-0.563886	5.44814	35.1005	3.24534e-06	0.000499765	988	824	711	543	512	508
	ENSMUSG00000015850.11	Adamtsl4	-0.532797	5.41153	35.0494	3.28131e-06	0.000503749	862	813	754	441	550	559
	ENSMUSG00000001240.13	Ramp2	-0.599469	4.64293	35.0192	3.30272e-06	0.000505635	520.14	460.92	467	275.07	301	304.64
	ENSMUSG00000050201.9	Otop2	3.75207	0.434509	48.139	3.36352e-06	0.000513525	2	2	4	16	30	59
	ENSMUSG00000052305.6	Hbb-bs	-1.14878	7.17951	80.0372	3.40078e-06	0.000517787	3144.91	3068.53	3406.37	1072.94	1323.05	1634.75
	ENSMUSG00000020566.19	Atp6v1c2	1.03341	4.76578	56.298	3.46354e-06	0.000524839	302	350	213	465	556	609
	ENSMUSG00000047787.8	Flrt1	1.33305	2.2459	34.7961	3.46603e-06	0.000524839	40	59	29	80	111	107
	ENSMUSG00000034107.10	Ano7	0.847071	3.39426	34.6525	3.57566e-06	0.000539964	141	107	113	184	202	212
	ENSMUSG00000000416.16	Cttnbp2	0.800566	4.26889	37.0719	3.61565e-06	0.000543589	201	232	240.78	294	374.64	422.45
	ENSMUSG00000014592.20	Camta1	0.540248	5.49676	34.5967	3.61928e-06	0.000543589	612	578	585	690	792	905
	ENSMUSG00000045087.8	S1pr5	0.719191	3.97362	34.5127	3.68605e-06	0.000552121	212	186	174	256	325	287
	ENSMUSG00000020062.7	Slc5a8	1.38135	1.81413	34.4742	3.71713e-06	0.000555275	36	33	23	64	66	91
	ENSMUSG00000005968.14	Tuft1	0.591536	7.105	37.2003	3.82865e-06	0.000570397	1991	1830	1510	2082	2400	2918
	ENSMUSG00000045672.15	Col27a1	-0.668222	4.31354	34.3236	3.8413e-06	0.000570747	384	405	381	212	215	253
	ENSMUSG00000021327.19	Zkscan3	0.528917	6.06743	34.278	3.87971e-06	0.00057338	855.71	833.84	951.61	1091.86	1197.31	1241.66
	ENSMUSG00000092021.8	Gbp11	-0.70242	4.43238	34.2867	3.87236e-06	0.00057338	489.83	445.38	354.54	256.89	258.34	210.94
	ENSMUSG00000048027.9	Rgmb	0.532006	6.09783	34.1079	4.02699e-06	0.000593564	1001	791	914	1048	1237	1330
	ENSMUSG00000048636.7	A730049H05Rik	-3.92309	-0.418439	34.082	4.04989e-06	0.000595355	22.23	17.76	15.36	0	0	3.03
	ENSMUSG00000073643.11	Wdfy1	0.709805	5.83269	45.2607	4.11063e-06	0.000602686	807	730	563	1094	1124	926
	ENSMUSG00000032125.20	Robo4	-0.813024	4.1832	36.4263	4.1358e-06	0.000604776	448	338	329	175	240	168
	ENSMUSG00000022098.10	Bmp1	-0.497327	7.15568	33.9467	4.17208e-06	0.000608476	2764	2811	2495	1531	1843	1907
	ENSMUSG00000003955.8	Fam162a	0.529976	5.53206	33.9068	4.20888e-06	0.000612232	660	594	576	709	796.67	933
	ENSMUSG00000047181.12	Samd14	-0.874711	3.2064	33.8687	4.24435e-06	0.000615674	194	195	179	81	103	102
	ENSMUSG00000058093.13	Zfp729b	0.776913	3.63735	33.8575	4.25476e-06	0.000615674	166.15	135.64	139.35	219.14	223.47	254.23
	ENSMUSG00000045094.8	Arhgef37	0.507969	6.21874	33.8239	4.28637e-06	0.000618632	1033	1099	846	1155	1351	1397
	ENSMUSG00000022505.9	Emp2	0.519261	8.47791	33.7258	4.38015e-06	0.000626945	5201	4604	4395	5471	6364	6938
	ENSMUSG00000022676.7	Snai2	0.604469	4.73427	33.733	4.37323e-06	0.000626945	360	307	350	445	473	510
	ENSMUSG00000024485.16	Slc4a9	0.968399	3.02931	33.7264	4.37961e-06	0.000626945	100	95	70	128	182	168
	ENSMUSG00000024887.10	Asah2	0.631569	4.91583	33.7164	4.38922e-06	0.000626945	377	398	366	459	522	655
	ENSMUSG00000060301.6	2610008E11Rik	0.58812	4.7911	33.5997	4.50397e-06	0.000641683	377	336	353	460	474	545
	ENSMUSG00000053702.16	Nebl	0.810127	3.70283	33.4787	4.62634e-06	0.000655487	157	148	149	213	223	300
	ENSMUSG00000089773.7	Skint1	0.885957	3.15683	33.4791	4.62592e-06	0.000655487	120	97	84	162	172	177
	ENSMUSG00000090515.2	Krtap27-1	3.93519	-0.248924	37.3965	4.63635e-06	0.000655487	1	2	1	10	14	38
	ENSMUSG00000030703.8	Gdpd3	0.872989	3.50408	33.3124	4.80028e-06	0.000675219	161.91	127.16	98.35	182.52	237.76	229.81
	ENSMUSG00000063130.4	Calml3	0.698405	8.54902	41.2484	4.79582e-06	0.000675219	5213	5104	3580	5979	6903	7840
	ENSMUSG00000020773.11	Trim47	-0.530079	5.43568	33.2782	4.83702e-06	0.000678664	915	832	726	449	582	547
	ENSMUSG00000053477.17	Tcf4	-0.467461	6.22915	33.2476	4.87009e-06	0.000681578	1490	1349	1365	912	910	980
	ENSMUSG00000028967.10	Errfi1	-0.490981	6.92683	33.2017	4.92012e-06	0.000686847	2672	2259	1971	1401	1555	1554
	ENSMUSG00000106143.1	Gm43735	2.67753	-0.158821	33.085	5.0498e-06	0.000703178	3	5	2	16	19	26
	ENSMUSG00000025555.14	Farp1	-0.527545	5.12393	33.0424	5.09818e-06	0.000706894	701	682	603	384	437	449
	ENSMUSG00000031647.10	Mfap3l	0.702883	5.73722	43.4194	5.10199e-06	0.000706894	678	609	671	863	894	1192
	ENSMUSG00000031565.18	Fgfr1	-0.494921	7.52406	33.0269	5.11582e-06	0.000707041	3706.88	3519	3197	2005	2281	2537.99
	ENSMUSG00000001870.16	Ltbp1	-0.454472	6.37651	32.9897	5.15858e-06	0.000711179	1660	1566	1420	1017	1057	1046
	ENSMUSG00000002020.15	Ltbp2	-0.54295	5.70422	32.9377	5.2189e-06	0.000715048	1085.26	1027.27	877.51	662.64	669.31	551.41
	ENSMUSG00000018868.4	Pnpla5	-0.565439	5.09219	32.9322	5.22536e-06	0.000715048	692	670	601	367	472	384
	ENSMUSG00000027782.10	Kpna4	0.472667	6.64403	32.9343	5.22285e-06	0.000715048	1459	1317	1277	1666	1642	1872
	ENSMUSG00000098678.1	Mroh6	0.911905	3.43056	32.7481	5.44556e-06	0.000743346	122	149	89	181	207	236
	ENSMUSG00000022651.6	Retnlg	-0.972462	3.08498	32.7038	5.50011e-06	0.000743738	215	172	149	87	96	67
	ENSMUSG00000038729.24	Pakap	-0.621679	6.21534	39.1542	5.5053e-06	0.000743738	1617	1588	1163.82	863.5	951.35	788.05
	ENSMUSG00000042250.13	Pglyrp4	0.720091	4.61094	35.1997	5.51155e-06	0.000743738	342	332	221	397	500	457
	ENSMUSG00000060510.14	Zfp266	0.647497	6.31411	41.1248	5.51553e-06	0.000743738	1068	973	957	1244	1322	1773
	ENSMUSG00000068134.13	Zfp120	0.581267	4.80628	32.7065	5.49679e-06	0.000743738	397	360	326	478	461	552
	ENSMUSG00000023892.8	Zfp51	0.687263	4.0505	32.6733	5.53792e-06	0.000744944	212	211	188	286	282	339
	ENSMUSG00000032714.6	Syde1	-0.615766	4.48724	32.6431	5.57567e-06	0.000747491	505	422	382	243	278	264
	ENSMUSG00000054046.7	Klk13	0.801533	3.7912	32.6366	5.58383e-06	0.000747491	173	174	139	213	248	321
	ENSMUSG00000041607.17	Mbp	-0.479323	6.56671	32.5927	5.63932e-06	0.000753101	1979	1640	1720	1058	1201	1273
	ENSMUSG00000032475.15	Nck1	0.528972	5.30111	32.5512	5.69233e-06	0.000758352	566	476	516	611	736	729
	ENSMUSG00000071561.2	Cstdc5	1.32752	4.72158	71.2579	5.71126e-06	0.000759049	273.74	286.76	168.89	600.66	538.35	535.71
	ENSMUSG00000032135.15	Mcam	-0.518047	6.04545	32.5	5.75849e-06	0.000763496	1381	1250	1132	826	880	707
	ENSMUSG00000026921.19	Egfl7	-0.648461	5.84203	39.987	5.80978e-06	0.000768458	1280	1174	940	711	692	579
	ENSMUSG00000038884.14	Shfl	-0.584442	4.95621	32.4336	5.84538e-06	0.000769493	618.49	659.52	517.86	372.32	388.06	341.29
	ENSMUSG00000039795.14	Zfand1	0.662784	4.18629	32.4371	5.84077e-06	0.000769493	233.38	225.73	219.07	289.19	329.51	373.36
	ENSMUSG00000000861.15	Bcl11a	0.536733	5.1596	32.3512	5.95533e-06	0.000782109	540	454	418	567.83	629.98	687
	ENSMUSG00000023411.12	Nfatc4	-0.583306	4.83626	32.2596	6.08009e-06	0.000796606	588	522	539	287	351	379
	ENSMUSG00000003379.7	Cd79a	-1.3234	2.22488	32.7033	6.11353e-06	0.000799099	137	98	79	49	30	35
	ENSMUSG00000015970.19	Chdh	0.477283	6.24782	32.1006	6.30359e-06	0.000822003	1013.16	994.98	1053.85	1249.21	1314.82	1377.07
	ENSMUSG00000020027.18	Socs2	-0.615785	4.532	32.0277	6.40886e-06	0.000827938	496.77	419	431.2	281.3	253	273.75
	ENSMUSG00000022816.11	Fstl1	-0.520377	9.12633	32.0478	6.37974e-06	0.000827938	10635	10804	10372	6447	6508	7530
	ENSMUSG00000026564.9	Dusp27	-0.672364	4.78284	33.7402	6.38455e-06	0.000827938	581	611	441	259	364	321
	ENSMUSG00000058006.12	Mdn1	0.48921	6.02724	32.0326	6.40176e-06	0.000827938	900	836	882	986	1167	1247
	ENSMUSG00000027318.17	Adam33	-0.671782	4.70619	33.0493	6.49152e-06	0.000836667	515	491	533	233	315	348
	ENSMUSG00000036256.13	Igfbp7	-0.48259	7.30916	31.96	6.50847e-06	0.000836905	3038	2877	3006	1813	1972	2117
	ENSMUSG00000022051.15	Bnip3l	0.533578	6.41443	33.0601	6.55941e-06	0.000841502	1225.32	1144.5	1005.71	1334.79	1376.22	1793.33
	ENSMUSG00000089724.1	Krtap4-8	4.33747	0.578043	53.0082	6.60677e-06	0.000845621	1	3	2	17	35.68	66.56
	ENSMUSG00000022617.15	Chkb	-0.468076	5.76165	31.8699	6.64362e-06	0.000848378	1092.43	983.83	965.41	621.33	727.38	678.66
	ENSMUSG00000024276.7	Zfp397	0.562266	5.341	31.7689	6.79876e-06	0.000866193	536	484	556	643	686	825
	ENSMUSG00000079165.10	Sap25	-0.994763	3.54803	36.0145	6.91885e-06	0.000879472	206.67	287.28	245.63	103.01	140.51	99.79
	ENSMUSG00000046768.13	Rhoj	-0.545815	4.88814	31.4981	7.23401e-06	0.000917428	626	530	538	346	370	352
	ENSMUSG00000006205.13	Htra1	-0.45346	6.32715	31.4762	7.27057e-06	0.00091996	1616	1436	1433	916	1086	1019
	ENSMUSG00000040663.9	Clcf1	-0.597674	5.00385	31.3893	7.41747e-06	0.000936409	716	639	514	380	417	335
	ENSMUSG00000018042.18	Cyb5r3	-0.473991	7.78192	31.3506	7.48385e-06	0.000940859	4373.9	4223	3791	2461	2940.87	2824
	ENSMUSG00000031953.2	Tmem170	0.811699	3.60525	31.3489	7.48667e-06	0.000940859	160	117	147	194	234	260
	ENSMUSG00000038587.9	Akap12	-0.590229	4.83619	31.3142	7.54689e-06	0.00094628	560	578	514	287	332	395
	ENSMUSG00000002833.11	Hdgfl2	-0.477435	5.90613	31.2795	7.60756e-06	0.000949591	1251	1140	988	653	816	766
	ENSMUSG00000093880.3	Tmem181c-ps	2.4938	0.211004	31.2858	7.59654e-06	0.000949591	4.04	1.76	8.98	25.29	20.47	34.59
	ENSMUSG00000054005.4	Mill1	0.684198	3.95308	31.1647	7.81192e-06	0.000972909	192	198	181	262	271	314
	ENSMUSG00000022623.17	Shank3	-0.556992	4.9495	31.1522	7.83457e-06	0.000973542	627.86	579.85	563.64	336.27	423.67	351.43
	ENSMUSG00000051379.12	Flrt3	0.695476	4.72122	33.9568	7.92057e-06	0.000982027	334	332	305	390	461	604
	ENSMUSG00000095105.2	Edaradd	0.585799	4.81669	31.0406	8.03959e-06	0.000994558	356	338	389	459	520	526
	ENSMUSG00000062743.9	Zfp677	0.954067	3.05945	31.0147	8.08804e-06	0.000998323	76	92	102	159	146	180
	ENSMUSG00000033187.8	BC016579	1.08089	2.41367	30.8114	8.47921e-06	0.00104197	61	59	43	104	94	119
	ENSMUSG00000036661.14	Dennd3	-0.732214	3.61377	30.8153	8.47144e-06	0.00104197	253	244	233	130	132	143
	ENSMUSG00000027326.13	Knl1	0.749414	3.7416	30.8001	8.50137e-06	0.00104238	177	134	168	237	250	256
	ENSMUSG00000026775.9	Yme1l1	0.442302	6.31722	30.7788	8.54381e-06	0.00104527	1199	1069	1005	1294	1350	1450
	ENSMUSG00000108985.1	A930030B08Rik	1.84838	1.11601	31.8378	8.59183e-06	0.00104883	12	9	22	40	41.9	63
	ENSMUSG00000005958.15	Ephb3	0.541569	5.29821	30.6865	8.72943e-06	0.00106201	567	500	482	561	768	754
	ENSMUSG00000026317.7	Cln8	0.493748	6.11932	30.6823	8.7381e-06	0.00106201	1007	1037	756	1152	1228	1242
	ENSMUSG00000027204.13	Fbn1	-0.505095	9.10452	30.559	8.9934e-06	0.00109064	10406.4	10889.7	9917.08	6518.93	6446	7327.75
	ENSMUSG00000037185.9	Krt80	0.613679	7.67376	35.5419	9.08805e-06	0.00109971	2988.58	2784.54	2076.19	3101.36	3763.88	4180.67
	ENSMUSG00000018862.11	Otop3	1.12335	3.91507	45.1324	9.12119e-06	0.00110132	182	176	102	261	299	360
	ENSMUSG00000042357.2	Gjb5	0.535157	5.53294	30.4886	9.14271e-06	0.00110152	723	623	490	743	795	904
	ENSMUSG00000039196.2	Orm1	0.955579	4.47566	44.3324	9.2587e-06	0.00111307	279.81	276.95	176.84	360.94	434.92	512.98
	ENSMUSG00000116895.1	Gm3435	1.44126	1.66496	30.4193	9.29251e-06	0.00111472	30	25.62	24.48	55.25	95.48	50.65
	ENSMUSG00000044952.5	Kctd21	1.01473	2.69551	30.405	9.32366e-06	0.00111604	72	56	76	123	143	115
	ENSMUSG00000075593.10	Gal3st4	0.640543	4.92141	32.2534	9.40965e-06	0.00112391	396.7	411.81	335.3	424.05	607.22	618.07
	ENSMUSG00000037999.13	Arap2	0.51937	5.47895	30.323	9.50478e-06	0.00113283	661	596	517.84	676.9	761.94	904.76
	ENSMUSG00000063047.9	Zfp780b	0.82877	3.33803	30.2794	9.60264e-06	0.00114203	113.25	107.5	127.27	196.61	187.42	187.39
	ENSMUSG00000015085.8	Entpd2	-0.649933	4.2018	30.2703	9.62333e-06	0.00114204	377.02	347.1	354	179	213.91	242
	ENSMUSG00000003420.8	Fcgrt	-0.501915	5.43043	30.1813	9.82686e-06	0.00115972	828	830	778	518	486	582
	ENSMUSG00000020656.16	Grhl1	0.580418	7.02427	34.2152	9.91874e-06	0.00115972	1882	1756	1426	1888	2381	2712
	ENSMUSG00000030527.15	Crtc3	-0.508731	5.62033	30.1636	9.86804e-06	0.00115972	1043	978	777	571	668	567
	ENSMUSG00000030559.8	Rab38	0.610176	4.65073	30.1569	9.8836e-06	0.00115972	364	291	305	416	411	523
	ENSMUSG00000040314.2	Ctsg	-1.53256	1.14919	30.1575	9.88216e-06	0.00115972	61	46	42	16	14	17
	ENSMUSG00000075289.5	Carns1	-1.21039	4.88892	63.5862	9.83838e-06	0.00115972	612.29	642.82	724.59	200.27	276.59	318.95
	ENSMUSG00000078897.10	Gm4724	1.07872	2.64282	30.1437	9.91431e-06	0.00115972	46.96	72.75	69.59	112.59	134.99	125.06
	ENSMUSG00000023885.9	Thbs2	-0.480853	7.18327	30.1281	9.95079e-06	0.00116102	2756	2673	2741	1641	1751	2022
	ENSMUSG00000024538.8	Ppic	-0.497613	5.72109	30.1011	1.00145e-05	0.00116599	990	956	1026	587	634	727
	ENSMUSG00000043681.5	Fam25c	1.04712	7.08313	65.475	1.02512e-05	0.00119106	1706	1519	1083	2241	2885	3051
	ENSMUSG00000032278.11	Paqr5	0.594011	4.60732	29.9409	1.04006e-05	0.00120412	333	296	307	370	439	497
	ENSMUSG00000066232.4	Ipo7	0.452183	7.08943	29.9382	1.04072e-05	0.00120412	2056	1756	1757	2232	2313	2470
	ENSMUSG00000024774.16	Ankrd22	0.701336	4.249	30.0471	1.04647e-05	0.00120825	292.14	231.08	179.06	355.08	321.87	366.69
	ENSMUSG00000079710.10	Gm3448	1.59302	1.4962	30.3937	1.05329e-05	0.0012136	18.3	16.19	30.77	54.35	78.05	51.11
	ENSMUSG00000033717.6	Adra2a	-1.29693	1.70798	29.8668	1.05846e-05	0.00121704	77	65	72	28	30	22
	ENSMUSG00000020176.17	Grb10	-0.538086	5.86827	31.507	1.10141e-05	0.0012638	1107	1039	1182	618	695	811
	ENSMUSG00000056492.6	Adgrf5	-0.475644	6.13231	29.6586	1.11208e-05	0.0012734	1346	1216	1369	876	862	871
	ENSMUSG00000022034.10	Esco2	0.744654	3.62518	29.5447	1.14267e-05	0.00130573	154	133	155	203	250	232
	ENSMUSG00000047953.7	Gp5	-2.59496	-0.0560146	29.5214	1.14904e-05	0.00131031	26	26	16	5	4	1
	ENSMUSG00000001053.15	N4bp3	0.633637	4.24488	29.4895	1.15781e-05	0.0013176	265	259	194	317	360	347
	ENSMUSG00000029061.2	Mmp23	-0.949119	2.88092	29.4631	1.16514e-05	0.00132322	152	158	149	56	73	91
	ENSMUSG00000000223.13	Drp2	-0.615662	5.11395	31.7298	1.16794e-05	0.00132369	766	606	650	322	422	475
	ENSMUSG00000000876.11	Pxmp4	-0.485356	5.48736	29.4441	1.17043e-05	0.0013238	915	824	788	473	599	594
	ENSMUSG00000052180.15	Serpinb6c	1.06758	2.25682	29.322	1.20509e-05	0.00135907	45	54	47	89	99	95
	ENSMUSG00000056216.9	Cebpg	0.467588	6.71888	29.3171	1.20651e-05	0.00135907	1476	1320	1470	1658	1826	1971
	ENSMUSG00000026042.16	Col5a2	-0.514386	8.45617	29.278	1.21787e-05	0.00136908	6569	6738	6632	4065	3937	4901
	ENSMUSG00000052557.11	Gan	0.711458	7.79628	40.5317	1.2255e-05	0.00137487	2839	2662	2648	3253	4051	5059
	ENSMUSG00000027007.16	Itprid2	0.503413	7.64683	29.1726	1.24905e-05	0.00139846	2931	2947	2174	3192	3482	3818
	ENSMUSG00000085236.3	2610206C17Rik	1.52351	1.4091	29.1559	1.25406e-05	0.00140123	29	21	14	39	60	71
	ENSMUSG00000039787.13	Cercam	-0.699061	4.19588	29.1426	1.25808e-05	0.0014029	365.67	311.09	406.53	178	211.82	229
	ENSMUSG00000031089.7	Slc6a14	1.36121	3.72421	50.8941	1.26699e-05	0.00140853	145	138	76	262	248	335
	ENSMUSG00000076612.8	Ighg2c	1.61271	1.05774	29.1092	1.26822e-05	0.00140853	16	12	19	53	38	42
	ENSMUSG00000037577.13	Ephx3	0.681893	3.99653	29.0946	1.27265e-05	0.00141063	196	186	206	246	306	322
	ENSMUSG00000079654.3	Prrt4	-1.17692	2.09917	29.0418	1.28893e-05	0.00142583	89	109	79	29	46	38
	ENSMUSG00000027230.9	Creb3l1	-0.602687	4.43762	28.9603	1.31449e-05	0.0014512	428	409	417	213	270	281
	ENSMUSG00000023942.15	Slc29a1	-0.442763	6.1998	28.9511	1.3174e-05	0.00145152	1447.47	1273.17	1366.64	871.12	965.41	939.24
	ENSMUSG00000040978.4	Gm11992	1.14288	4.33787	50.281	1.36164e-05	0.00149729	245	226	141	361	385	494
	ENSMUSG00000034205.16	Loxl2	-0.497734	6.85756	28.8586	1.37312e-05	0.00150692	2183.8	2365.58	2009.75	1265.77	1348.73	1676.69
	ENSMUSG00000007379.15	Dennd2c	0.52906	5.63504	29.5428	1.38095e-05	0.00151252	721	677	572	754	822	1044
	ENSMUSG00000000320.10	Alox12	0.555756	4.85169	28.6972	1.40077e-05	0.0015312	407	378	344	430	512	590
	ENSMUSG00000044408.7	Sptssa	0.481953	6.93942	28.6705	1.40988e-05	0.00153813	1849	1481.18	1626	1914	2069	2403.18
	ENSMUSG00000028088.14	Fmo5	0.593954	4.27038	28.6404	1.42021e-05	0.00154635	279	238	225	319	348	364
	ENSMUSG00000035557.9	Krt17	0.56709	7.12679	32.3658	1.42952e-05	0.00155344	2198.11	1797.11	1486.16	2090	2627.15	2745.19
	ENSMUSG00000069255.13	Dusp22	0.43453	6.37334	28.5659	1.44611e-05	0.0015684	1230	1111	1070	1261	1446	1546
	ENSMUSG00000020697.16	Lig3	0.450923	6.16631	28.5314	1.4583e-05	0.00157853	1013.21	907.17	1006.71	1151.83	1288.96	1255.79
	ENSMUSG00000027555.8	Car13	0.434688	6.5394	28.514	1.46448e-05	0.00157917	1405	1259	1167	1557	1526	1679
	ENSMUSG00000031398.13	Plxna3	0.482069	5.85917	28.5137	1.4646e-05	0.00157917	777	789	770	837	1070	1115
	ENSMUSG00000044017.16	Adgrd1	-0.51404	5.52312	28.4951	1.47121e-05	0.00158322	940	931	745	484	548	656
	ENSMUSG00000024483.19	Ankhd1	0.479183	6.50828	28.4695	1.4804e-05	0.00159003	1206.35	1175.07	1282.5	1388.1	1585.78	1758.9
	ENSMUSG00000041886.7	Macc1	0.924363	4.10485	37.2335	1.49383e-05	0.00160005	219	200	155	284	287	432
	ENSMUSG00000050092.3	Sprr2b	3.61853	2.99731	104.396	1.49551e-05	0.00160005	29	21	8	165	203	291
	ENSMUSG00000024299.17	Adamts10	-0.486364	5.68925	28.398	1.50643e-05	0.00160863	896	1023	976	604	644	664
	ENSMUSG00000024597.11	Slc12a2	0.499779	5.67783	28.3748	1.51495e-05	0.00161229	680	727	640	773	861	1042
	ENSMUSG00000053510.12	Nrd1	0.508917	8.17678	28.3717	1.51611e-05	0.00161229	4020.4	4109.68	3439.13	4278.57	5017.11	5907.45
	ENSMUSG00000107705.1	Gm45062	0.790266	3.94676	30.3642	1.51858e-05	0.00161229	165.58	219.08	158.44	254.87	265.53	347.08
	ENSMUSG00000097328.7	Tnfsf12	-0.618191	4.52375	28.3394	1.52809e-05	0.00161928	468.25	484.08	389.21	285.78	282.63	232.66
	ENSMUSG00000029659.16	Medag	-0.472929	5.5926	28.3297	1.53171e-05	0.00162002	938	930.3	839.44	520.54	604.14	675.72
	ENSMUSG00000031176.8	Dynlt3	0.479764	6.83757	28.3003	1.54274e-05	0.00162858	1745	1456	1428	1897	1790	2251
	ENSMUSG00000053746.8	Ptrh1	0.944058	3.32824	30.3408	1.58637e-05	0.00167145	146.39	109.04	76.88	159.84	201.11	225.29
	ENSMUSG00000026811.18	St6galnac6	-0.602424	4.45251	28.122	1.61153e-05	0.00169474	432	414	421	217	256	299
	ENSMUSG00000034359.16	Skint2	1.95334	0.512754	28.1064	1.61769e-05	0.00169799	7	12	7	28	23	43
	ENSMUSG00000022197.16	Pdzd2	0.537541	7.16383	30.3011	1.65601e-05	0.00173493	1934	1867	1850	2089	2472	3035
	ENSMUSG00000038357.10	Camp	-1.6897	3.06288	50.2669	1.66596e-05	0.00174206	246	181	179	81	44	46
	ENSMUSG00000028677.19	Rnf220	-0.473815	5.94893	27.9777	1.6696e-05	0.00174258	1353	1127	1002	739	847	715
	ENSMUSG00000047496.6	Rnf152	0.816327	3.47667	27.8967	1.70321e-05	0.00177432	163	122	104	171	210	249
	ENSMUSG00000021904.6	Sema3g	-0.557321	4.78657	27.8054	1.74195e-05	0.00181127	577	541	467	324	371	295
	ENSMUSG00000029576.17	Radil	-0.887247	2.90569	27.7976	1.74531e-05	0.00181137	179	143	140	63	77	90
	ENSMUSG00000048537.16	Phldb1	-0.439946	6.57679	27.7799	1.75294e-05	0.00181588	1867	1778	1667	1036	1274	1307
	ENSMUSG00000022186.14	Oxct1	0.441405	7.55817	27.761	1.76113e-05	0.00181775	2795.94	2497.97	2443.91	3098.92	3136.99	3441.86
	ENSMUSG00000074207.10	Adh1	-0.549859	4.84207	27.7606	1.7613e-05	0.00181775	584.99	602	457.98	314	338	382
	ENSMUSG00000074199.7	Krtdap	0.615819	8.82058	32.4305	1.77068e-05	0.00182403	6691	5718	4944	6595	8139	9769
	ENSMUSG00000039457.4	Ppl	0.65643	8.85191	34.5715	1.77492e-05	0.00182501	6317	6286	4815	6598	9133	9603
	ENSMUSG00000021253.7	Tgfb3	-0.527801	5.02903	27.7161	1.78075e-05	0.00182528	631	595.97	626.99	340	403	446.87
	ENSMUSG00000031950.7	Gabarapl2	0.53195	6.19522	30.5246	1.78177e-05	0.00182528	1064.1	1022.35	818.71	1085.57	1263	1522.11
	ENSMUSG00000048332.13	Lhfp	-0.504717	5.3414	27.7025	1.78677e-05	0.00182702	788.93	734	766.97	473	451.97	564.99
	ENSMUSG00000006576.16	Slc4a3	-0.540145	4.81813	27.6827	1.79551e-05	0.00183258	580	571	462	294	359	369
	ENSMUSG00000108353.1	Gm45205	1.06614	2.50143	27.623	1.82222e-05	0.00185642	44.83	63.54	64.45	94.6	109.86	131.86
	ENSMUSG00000027536.6	Chmp4c	0.855079	4.95565	41.7686	1.83472e-05	0.00186572	360.03	375.04	331.19	458.09	578.13	750.22
	ENSMUSG00000024371.14	C2	-0.461412	6.7277	27.4824	1.88683e-05	0.00191521	2148.48	2166.07	1640.08	1312	1349	1308.33
	ENSMUSG00000018796.13	Acsl1	0.473884	7.71847	27.4708	1.89229e-05	0.00191724	3136	2846	2566	3098	3701	4152
	ENSMUSG00000035279.8	Ssc5d	-0.562184	5.36746	29.4097	1.90576e-05	0.00192735	818	771	782	411	472	603
	ENSMUSG00000037640.15	Zfp60	0.739213	3.67713	27.3894	1.93093e-05	0.00194463	170.45	130	159.54	232.62	212	262.95
	ENSMUSG00000042225.3	Ammecr1	0.533427	5.21869	27.377	1.93688e-05	0.00194463	552	456	463	567	617	780
	ENSMUSG00000085004.2	5430427M07Rik	1.86086	1.13981	30.4097	1.9358e-05	0.00194463	18	20	6	34	50	64
	ENSMUSG00000095134.2	Mid1-ps1	2.6507	0.813882	37.3567	1.93216e-05	0.00194463	8.79	10.48	3.21	52.41	53.86	22.41
	ENSMUSG00000020669.15	Sh3yl1	0.659958	3.87332	27.3066	1.97114e-05	0.00197545	208	189	151	245	266	285
	ENSMUSG00000064080.12	Fbln2	-0.46792	7.61807	27.2566	1.99583e-05	0.00199476	3848	3944	3251	2467	2600	2272
	ENSMUSG00000098188.1	Sowahc	0.462279	5.26588	27.253	1.99761e-05	0.00199476	580	509	476	630	672	682
	ENSMUSG00000028763.18	Hspg2	-0.444296	8.38778	27.219	2.01462e-05	0.0020079	6683	6247	5767	3935	4455	4271
	ENSMUSG00000029231.15	Pdgfra	-0.430978	7.11503	27.2123	2.01801e-05	0.0020079	2685.53	2608.89	2401.91	1673	1697	1892
	ENSMUSG00000006386.15	Tek	-0.665768	4.9845	31.9886	2.03947e-05	0.00202562	588	575	697	339	336	412
	ENSMUSG00000030470.15	Csrp3	-0.593122	7.58917	32.3066	2.08247e-05	0.00206463	4358	3967	2942	1916	2464	2484
	ENSMUSG00000017291.13	Taok1	0.475735	6.62327	27.0346	2.10964e-05	0.00208658	1475	1302	1218	1552	1550	2016
	ENSMUSG00000027132.3	Katnbl1	0.503269	4.93642	27.027	2.11367e-05	0.00208658	434	415	374	504	508.2	585
	ENSMUSG00000029680.2	Hyal4	1.79244	0.490458	27.0157	2.11968e-05	0.00208658	10	11	7	31	25	34
	ENSMUSG00000039476.13	Prrx2	-0.747913	3.31893	27.0193	2.11775e-05	0.00208658	209	198	189	104	104	119
	ENSMUSG00000104445.1	Rhbg	0.605651	4.22124	26.9888	2.13402e-05	0.00209698	267.71	237.9	208	346.9	337	313
	ENSMUSG00000078485.3	Plekhn1	0.47898	8.3949	26.9745	2.14167e-05	0.00210077	4903	4921	3824	5158	6197	6159
	ENSMUSG00000028148.11	Them5	0.516214	7.43484	28.2534	2.14918e-05	0.00210414	2549	2279	2075	2421	3164	3533
	ENSMUSG00000047884.6	Klk9	1.19977	3.41886	38.6359	2.1527e-05	0.00210414	132	117	65	177	232	253
	ENSMUSG00000084128.10	Esrp2	0.469135	7.36322	26.9138	2.17451e-05	0.00212172	2438.48	2230.1	2023.89	2343.01	3103.49	3106.52
	ENSMUSG00000019487.11	Trip10	-0.431017	5.77076	26.8766	2.19496e-05	0.0021379	1064	1017	946	614	717	741
	ENSMUSG00000032011.5	Thy1	-0.451558	7.19059	26.8303	2.22061e-05	0.00214944	2818	2785	2555	1826	1987	1680
	ENSMUSG00000039168.15	Dap	-0.448311	6.23621	26.8335	2.21884e-05	0.00214944	1575	1379	1259	968	999	867
	ENSMUSG00000040414.8	Slc25a28	-0.47765	6.61555	26.9541	2.22231e-05	0.00214944	2010	2002	1523	1160	1361	1130
	ENSMUSG00000074625.10	Arhgap40	1.03711	3.66475	35.7419	2.21777e-05	0.00214944	144	161	96	191	266	302
	ENSMUSG00000031486.15	Adgra2	-0.560571	6.15549	31.5263	2.23113e-05	0.00215421	1494	1493	1130	870	937	753
	ENSMUSG00000026273.13	Mterf4	-0.429751	6.19149	26.7899	2.24328e-05	0.00216152	1427.46	1303.6	1319.27	809.53	967.88	999.81
	ENSMUSG00000045871.5	Slitrk6	1.34536	4.40771	58.3427	2.2465e-05	0.00216152	190	152	233	380	447	531
	ENSMUSG00000038212.16	Mfsd14b	0.436399	6.05017	26.7644	2.25775e-05	0.00216858	1012	873	841	1158	1074	1157
	ENSMUSG00000025504.14	Eps8l2	0.509389	6.60195	28.6374	2.26168e-05	0.00216859	1450.43	1380.32	1061.96	1407.5	1835.01	1858.52
	ENSMUSG00000016494.9	Cd34	-0.505711	7.74863	27.2528	2.26883e-05	0.00217169	4126.75	4041.77	4016.67	2334.84	2437.91	3166.82
	ENSMUSG00000047854.5	Stx19	1.16679	2.23898	26.7559	2.28451e-05	0.00218293	49	53	36	63	100	124
	ENSMUSG00000021636.15	Marveld2	0.571304	4.41179	26.6968	2.29651e-05	0.00219062	295	285	246	329	378	425
	ENSMUSG00000024909.15	Efemp2	-0.533893	5.18104	26.671	2.31149e-05	0.00220023	761	771	545	428	468.73	418.72
	ENSMUSG00000040690.15	Col16a1	-0.425344	6.18322	26.6658	2.31453e-05	0.00220023	1453	1348	1228	807	957	1003
	ENSMUSG00000017466.9	Timp2	-0.572932	8.33851	29.9678	2.33887e-05	0.00221956	6364	5839	6475	3244	3763	4635
	ENSMUSG00000006585.3	Cdt1	-0.526981	4.70643	26.6117	2.3464e-05	0.00221964	520	509	455	311	340	297
	ENSMUSG00000022510.14	Trp63	0.470057	7.76741	26.604	2.35096e-05	0.00221964	3320	2849	2690	3274	3704	4333
	ENSMUSG00000026984.4	Il1f6	1.56506	2.62995	39.561	2.34773e-05	0.00221964	55	65	30	125	107	176
	ENSMUSG00000086903.4	Hotair	0.910749	2.63007	26.5859	2.36171e-05	0.00222599	77	66	62	112	110	133
	ENSMUSG00000060568.14	Fam78b	-0.811619	3.07317	26.5717	2.37021e-05	0.00222692	174	171	164	73	96	99
	ENSMUSG00000070867.4	Trabd2b	-0.493153	5.01861	26.5708	2.37073e-05	0.00222692	631	644	552	361	400	436
	ENSMUSG00000037221.13	Mospd3	-0.558143	4.48537	26.5433	2.38727e-05	0.00223866	492	410	384	250	293	260
	ENSMUSG00000031286.6	Glt28d2	0.789357	3.28758	26.4976	2.41503e-05	0.00226077	118.44	122	103.04	149.31	181.32	218.36
	ENSMUSG00000086968.8	4933431E20Rik	0.665201	4.6092	29.0836	2.41901e-05	0.00226077	296.47	290.98	319.9	384.7	403.46	545.39
	ENSMUSG00000037490.5	Slc2a12	0.619918	4.00549	26.4794	2.42623e-05	0.0022637	233.05	204.62	172.7	272.43	286.76	304.27
	ENSMUSG00000035184.15	Fam124a	-0.69752	3.62859	26.4628	2.4364e-05	0.00226937	250	270	212	123	150	143
	ENSMUSG00000063251.6	Krtap4-1	5.36824	1.89691	85.1506	2.44944e-05	0.0022777	3	3	2	51.78	99	171.47
	ENSMUSG00000001774.8	Chordc1	0.451097	5.43813	26.3932	2.47982e-05	0.00229823	627	581	561	666	748	818
	ENSMUSG00000037681.13	Esyt3	0.792967	5.26261	40.2009	2.47908e-05	0.00229823	475.13	493.99	390.42	567.77	715.86	892.09
	ENSMUSG00000063060.6	Sox7	0.444671	5.59021	26.3743	2.49174e-05	0.00230542	726	609	637	753	843	879
	ENSMUSG00000001794.13	Capns1	-0.467979	7.75015	26.3665	2.49668e-05	0.00230614	4507	4134	3485	2781	2770	2486
	ENSMUSG00000050910.5	Cdr2l	-0.548293	4.47996	26.343	2.51161e-05	0.00231607	453	447	376	254	288	261
	ENSMUSG00000021930.14	Spryd7	0.480071	5.32734	26.3235	2.52406e-05	0.00232369	607	556	461	613	701	771
	ENSMUSG00000023953.9	Polh	0.505225	4.96785	26.3135	2.53051e-05	0.00232576	438	397	412	514	603	516
	ENSMUSG00000028978.12	Nos3	-0.612621	4.46374	26.2869	2.54764e-05	0.00233377	492.62	446.82	348.17	241.86	299.96	231.37
	ENSMUSG00000075217.1	4833423E24Rik	0.838396	5.89088	47.1209	2.54523e-05	0.00233377	804	695	568	981	1029	1389
	ENSMUSG00000028047.11	Thbs3	-0.415469	6.10063	26.2294	2.58521e-05	0.00236169	1337.45	1291.62	1162.24	791.63	882.68	946.4
	ENSMUSG00000078879.10	Zfp973	1.43767	1.44349	26.2272	2.58665e-05	0.00236169	24.65	13.33	30.04	53.89	58.38	58.84
	ENSMUSG00000072676.12	Tmem254a	-0.78159	3.22697	26.2054	2.60106e-05	0.00237095	189.37	174.25	199.36	96.76	94.58	110.01
	ENSMUSG00000081683.5	Fzd10	0.66336	3.97153	26.1886	2.61218e-05	0.00237717	220	166	198	251	279	324
	ENSMUSG00000022091.6	Sorbs3	-0.516814	5.15198	26.1813	2.61707e-05	0.00237771	699	682	636	346	477	481
	ENSMUSG00000035615.12	Frmpd1	0.704558	4.32916	28.6403	2.64773e-05	0.00240163	270	274	195	299	364	447
	ENSMUSG00000071637.5	Cebpd	-0.64205	3.91738	26.0886	2.67965e-05	0.00242662	328.36	310.33	247.48	164.25	189.67	167.41
	ENSMUSG00000094686.1	Ccl21a	-0.662954	6.56454	36.9284	2.6984e-05	0.00243961	2078.4	1739.65	1792.68	1157.16	1192.71	903.64
	ENSMUSG00000030607.7	Acan	-0.768118	3.50098	26.035	2.71661e-05	0.00245207	217	231	231	108	109	152
	ENSMUSG00000029307.7	Dmp1	-0.92784	3.90307	33.4844	2.72704e-05	0.00245748	336	304	299	123	126	207
	ENSMUSG00000031696.9	Vps35	0.425864	7.24736	25.9932	2.7458e-05	0.00247037	2295	2051.99	1934	2558	2480.96	2721
	ENSMUSG00000103839.1	Gm37607	1.20258	1.80005	25.9791	2.75569e-05	0.00247525	39	25	35	57	71	83
	ENSMUSG00000086784.2	Isoc2a	-0.688554	4.12939	26.5392	2.76218e-05	0.00247707	364	382	292	226	195	169
	ENSMUSG00000050704.3	2310061N02Rik	4.83788	1.21663	62.3155	2.77516e-05	0.00248468	4	3	0	41	50	104
	ENSMUSG00000021340.13	Gpld1	0.511561	4.69431	25.9337	2.7879e-05	0.00248974	363.84	354.29	311.78	406.37	471.1	476.86
	ENSMUSG00000038250.9	Usp38	0.449269	5.59662	25.9311	2.78978e-05	0.00248974	744.71	679	559	780	820	887.81
	ENSMUSG00000027533.10	Fabp5	0.471201	9.27038	25.924	2.79485e-05	0.00249025	9186.16	8821.46	7118.57	9639.09	10893.5	11516.4
	ENSMUSG00000005338.13	Cadm3	-0.540237	5.72854	28.877	2.8067e-05	0.0024966	1073.32	1030.89	930.8	516.05	636.15	777.2
	ENSMUSG00000022105.6	Rb1	0.445978	5.50192	25.8763	2.82924e-05	0.0024966	649	607.93	594.52	759.18	732.44	834.24
	ENSMUSG00000027246.12	Ell3	0.550681	4.64509	25.8946	2.816e-05	0.0024966	335.06	348.3	296.23	368.28	493	464.36
	ENSMUSG00000034245.10	Hdac11	0.68777	3.74334	25.8727	2.83185e-05	0.0024966	147.82	174.9	168.15	230.82	235.82	265
	ENSMUSG00000055960.12	Skint4	0.662844	4.59966	28.5602	2.82776e-05	0.0024966	312	276	315	373	406	545
	ENSMUSG00000072244.11	Trim6	-1.70146	2.05766	35.2426	2.83352e-05	0.0024966	109	121	67	38	28	17
	ENSMUSG00000078684.8	5830417I10Rik	0.460009	5.9794	25.8982	2.81337e-05	0.0024966	873.48	776.41	910.42	970.02	1159.06	1129.58
	ENSMUSG00000019853.6	Hebp2	0.656251	5.59092	34.4513	2.85483e-05	0.00251139	695	612	508	721	848	1066
	ENSMUSG00000038740.9	Mvb12b	-0.51317	4.71339	25.7825	2.89816e-05	0.00254546	540	464	481	301	316	342
	ENSMUSG00000067586.4	S1pr3	-0.516752	4.99815	25.7668	2.90983e-05	0.00255168	688	619	512	333	435	402
	ENSMUSG00000027356.8	Fermt1	0.499678	5.14324	25.7181	2.9465e-05	0.00257974	459	504	448	524	644	678
	ENSMUSG00000020640.10	Itsn2	0.428172	6.88554	25.6841	2.97243e-05	0.00259426	1616.65	1603.35	1643.04	1906.96	1987.84	2153.26
	ENSMUSG00000039153.17	Runx2	-0.506997	4.81873	25.6863	2.97071e-05	0.00259426	552.13	511.55	528.94	335.22	328.79	369.69
	ENSMUSG00000049421.13	Zfp260	0.502478	5.65449	26.5457	2.98141e-05	0.002598	660	664	684	815	791	1025
	ENSMUSG00000040415.15	Dtx3	-0.414354	6.16824	25.6586	2.99198e-05	0.00260312	1346	1344	1275	818	970	961
	ENSMUSG00000038780.14	Smurf1	-0.429398	6.34195	25.6349	3.01032e-05	0.00261206	1664	1581	1268	958	1110	1012
	ENSMUSG00000092274.3	Neat1	0.482535	12.1448	25.6331	3.01168e-05	0.00261206	64206.8	61155.8	57509.7	70827.6	85288.4	79693.1
	ENSMUSG00000025509.15	Pnpla2	-0.459335	6.3554	25.6083	3.03099e-05	0.0026206	1786	1554	1263	877	1087	1114
	ENSMUSG00000026389.16	Steap3	-0.449055	5.36615	25.6128	3.02753e-05	0.0026206	777	749	766	496	515	539
	ENSMUSG00000037617.12	Spag1	0.627466	4.16482	25.5972	3.0397e-05	0.00262404	249.91	252.7	177.53	280.86	339.62	347.49
	ENSMUSG00000078896.11	Zfp965	1.676	0.915562	25.5799	3.05329e-05	0.00263167	9.74	20.48	11.26	51.5	31.55	36.7
	ENSMUSG00000002996.17	Hbp1	0.415155	6.48109	25.5425	3.0829e-05	0.00265306	1326.57	1237.01	1141.15	1431.8	1446.98	1671.54
	ENSMUSG00000010830.8	Kdelr3	-0.674457	3.81397	25.5259	3.09616e-05	0.00265466	275	252	298	152	151	175
	ENSMUSG00000027376.15	Prom2	0.444997	7.12863	25.5222	3.09912e-05	0.00265466	2163	1869	1716	2034	2577	2602
	ENSMUSG00000039682.12	Lap3	0.423495	6.77158	25.5271	3.09525e-05	0.00265466	1675	1553	1299	1678	1926	1983
	ENSMUSG00000080115.3	Eef1akmt3	1.1486	1.74944	25.5088	3.1099e-05	0.00265978	35	33	30	56	67	78
	ENSMUSG00000070583.1	Fv1	0.924047	2.64552	25.4937	3.12201e-05	0.00266603	69	58	78	115	128	117
	ENSMUSG00000013846.10	St3gal1	-0.415429	7.22578	25.4678	3.14304e-05	0.00267339	2919	2749	2606	1817	2035	1865
	ENSMUSG00000032085.5	Tagln	-0.486811	5.17378	25.4534	3.15476e-05	0.00267339	732.74	625.62	671.38	404.16	429.82	502.58
	ENSMUSG00000033825.10	Tpsb2	0.605662	4.20566	25.4568	3.15193e-05	0.00267339	226	229	247	285	344	361
	ENSMUSG00000036825.12	Ssx2ip	0.424671	5.77107	25.4568	3.15198e-05	0.00267339	844.98	720.91	690.89	833	966	991.96
	ENSMUSG00000048562.7	Sp8	0.640533	3.93826	25.4573	3.15153e-05	0.00267339	234	188	157	263	284	281
	ENSMUSG00000001420.13	Tmem79	0.564543	5.26431	27.8027	3.18578e-05	0.00268735	568.57	557.33	379.29	607.01	722.42	715.15
	ENSMUSG00000019278.5	Dpep1	-0.677139	3.95905	25.4186	3.18328e-05	0.00268735	345	318	257	142	173	215
	ENSMUSG00000050714.9	Zbtb26	0.881347	2.78345	25.4238	3.17896e-05	0.00268735	70.27	74.22	85.55	117.92	139.5	134.66
	ENSMUSG00000045019.4	Acer1	0.437154	6.8988	25.3974	3.20078e-05	0.00269408	1730.43	1680.11	1497.42	1756.44	2061.96	2316.15
	ENSMUSG00000062609.14	Kcnj15	0.54026	4.62056	25.3942	3.20348e-05	0.00269408	365.87	283.51	317.28	430.05	436.95	426.85
	ENSMUSG00000039883.5	Lrrc17	-0.615562	4.04037	25.3768	3.21795e-05	0.00270215	311	312	329	171	195	209
	ENSMUSG00000024395.9	Lims2	-0.77278	3.36374	25.363	3.22946e-05	0.00270266	204.97	209	203.91	85	131	119
	ENSMUSG00000025608.9	Podxl	-0.429943	6.10321	25.3504	3.24e-05	0.00270266	1310	1204	1290	875	893	836
	ENSMUSG00000033294.11	Noc4l	-0.481667	5.49648	25.3531	3.23774e-05	0.00270266	952	899	697	534	619	522
	ENSMUSG00000034845.6	Plvap	-0.580326	6.51356	31.7031	3.23862e-05	0.00270266	2083	1696	1534	1158	1153	941
	ENSMUSG00000052563.13	D930048N14Rik	0.547034	4.60666	25.3411	3.24782e-05	0.00270266	334	333	288	354	467	468
	ENSMUSG00000052911.9	Lamb2	-0.429368	7.12257	25.3463	3.24348e-05	0.00270266	2725	2510	2495	1525	1866	1914
	ENSMUSG00000022894.6	Adamts5	-0.440905	5.8176	25.315	3.26987e-05	0.00271287	1134	1076	931	719	648	759
	ENSMUSG00000041577.5	Prelp	-0.696865	7.67659	36.6068	3.26577e-05	0.00271287	4235	3704.93	4268	1921	2240	2822
	ENSMUSG00000042579.2	4632404H12Rik	0.659373	4.20651	25.6531	3.28292e-05	0.00271962	219	213	254	279	334	393
	ENSMUSG00000036052.14	Dnajb5	-0.510639	5.23405	25.2847	3.29571e-05	0.00272614	765	778	595	386	472	525
	ENSMUSG00000060470.7	Adgrg3	-0.66713	3.8451	25.2718	3.30677e-05	0.00273122	338	251	258	154	184	152
	ENSMUSG00000074634.12	Tmem267	-1.21663	3.06098	33.8681	3.33052e-05	0.00274673	227	220	111.15	70	74	75
	ENSMUSG00000072941.5	Sod3	-0.557613	7.15124	29.6612	3.38003e-05	0.00278343	3153	2998	2084	1676	1665	1781
	ENSMUSG00000094800.8	Gm9780	-0.91302	3.59743	29.649	3.3917e-05	0.00278889	221.08	257.48	273.3	91.8	123.01	156.03
	ENSMUSG00000029832.16	Nfe2l3	1.30953	3.79171	45.4143	3.44143e-05	0.00282047	136	145	103	200	304	377
	ENSMUSG00000045975.8	C2cd2	0.584971	6.06677	31.6163	3.43995e-05	0.00282047	913	876	804	952	1192	1454
	ENSMUSG00000074647.3	Fam83c	0.580607	6.48637	31.6073	3.44537e-05	0.00282047	1287.97	1136.12	1056.59	1242.01	1693.92	1874.63
	ENSMUSG00000013766.11	Ly6g6e	0.596279	4.20778	25.0999	3.45798e-05	0.00282604	265.62	256.11	188.96	299.89	345.62	341.84
	ENSMUSG00000031700.11	Gpt2	0.537632	5.09297	25.498	3.46237e-05	0.00282604	455	449	438	471	639	695
	ENSMUSG00000039263.16	Npepl1	-0.407536	5.93961	25.0626	3.49175e-05	0.00284582	1172	1180	1029	735	826	788
	ENSMUSG00000017309.11	Cd300lg	-0.802096	3.1192	25.0489	3.50427e-05	0.00285184	165	171	187	78	96	104
	ENSMUSG00000045394.9	Epcam	0.570745	5.20526	27.5168	3.5461e-05	0.00288165	515	541	382	543	721	704
	ENSMUSG00000034557.14	Zfyve9	0.415974	6.22525	24.9922	3.55647e-05	0.00288585	1093.22	1065.58	942.42	1180.4	1216.57	1415.91
	ENSMUSG00000034957.10	Cebpa	0.451538	7.08276	24.9833	3.56476e-05	0.00288834	2212	1839	1519	2150	2382	2455
	ENSMUSG00000026825.17	Dnm1	-0.583967	5.90391	31.1438	3.60564e-05	0.0029172	1183	1121	1158	557	743	841
	ENSMUSG00000000001.4	Gnai3	0.415532	7.55426	24.9296	3.61514e-05	0.00292062	2890	2556	2362	3055	3178	3346
	ENSMUSG00000078254.1	Krtap29-1	6.56409	-1.01334	29.961	3.62661e-05	0.00292563	0	0	0	3	14	17
	ENSMUSG00000075566.2	Krtap4-6	5.69294	0.480261	49.3496	3.63251e-05	0.00292612	0	1	1	13.22	41.4	61.19
	ENSMUSG00000041439.15	Mfsd6	0.470727	6.78043	25.3783	3.68261e-05	0.00296218	1664	1452	1350	1547	1950	2216
	ENSMUSG00000024096.17	Ralbp1	0.419517	7.45504	24.818	3.72237e-05	0.00297505	2738	2404	2142	2746	3125	3090
	ENSMUSG00000031667.16	Aktip	0.47957	5.20674	24.8131	3.72709e-05	0.00297505	530.38	465.36	493.05	562.41	629.18	725.95
	ENSMUSG00000036564.17	Ndrg4	-0.570861	4.55295	24.8093	3.73083e-05	0.00297505	452	416	477	268	254	315
	ENSMUSG00000037095.8	Lrg1	-0.672954	4.15164	25.4891	3.71638e-05	0.00297505	445	313	296	219	200	185
	ENSMUSG00000055978.5	Fut2	0.500685	4.95699	24.8266	3.71399e-05	0.00297505	428.94	444.88	367.94	464.97	553.94	603
	ENSMUSG00000068071.2	Gm6358	6.08243	-1.36632	25.6911	3.71982e-05	0.00297505	0	0	0	8	5	11
	ENSMUSG00000056632.8	Dsg3	0.417947	7.01524	24.7849	3.7548e-05	0.00298987	1968	1709	1685	1987	2192	2426
	ENSMUSG00000036862.15	Dchs1	-0.594337	4.11772	24.7525	3.78679e-05	0.00301102	348	320.96	332	172	221.91	218.93
	ENSMUSG00000021120.11	Pigh	0.539509	4.52929	24.7359	3.80342e-05	0.0030118	306.08	287.7	310.62	360.09	413.5	442.52
	ENSMUSG00000041444.14	Arhgap32	0.518814	6.47501	28.0195	3.80408e-05	0.0030118	1226	1112	1192	1285	1547	1853
	ENSMUSG00000055333.14	Fat2	0.416856	7.43242	24.7367	3.80259e-05	0.0030118	2491	2317	2342	2666	3119	3032
	ENSMUSG00000025784.5	Clec3b	-0.960539	6.1233	53.0358	3.83192e-05	0.00302951	1591	1557	1307	532	715	869
	ENSMUSG00000024653.2	Scgb1a1	2.15336	0.0346346	24.6787	3.86094e-05	0.00304811	6	7	3	14	21	32
	ENSMUSG00000070436.12	Serpinh1	-0.425306	8.16106	24.6673	3.87255e-05	0.00305292	5714	5467	4721	3559	3610	3719
	ENSMUSG00000027806.9	Tsc22d2	0.537756	5.46201	26.9692	3.89069e-05	0.00306287	620	620	500	670	721	938
	ENSMUSG00000096433.2	Zfp994	0.741303	3.24771	24.6309	3.9098e-05	0.00307355	130.35	102.52	108.17	180.85	170.57	172.47
	ENSMUSG00000069206.14	Zfp874a	0.822597	3.14534	24.616	3.9252e-05	0.00308128	108	81.37	115.75	157.43	156.59	184.97
	ENSMUSG00000032548.14	Slco2a1	-0.628843	6.62402	33.712	3.93342e-05	0.00308336	2175	2029	1608	1151	1314	981
	ENSMUSG00000071267.11	Zfp942	0.649071	3.96491	24.5628	3.98053e-05	0.00311589	236.48	177.88	172.53	293.11	249.54	300.51
	ENSMUSG00000036395.15	Glb1l2	1.00302	3.57058	31.9201	3.9907e-05	0.00311945	146	128	107	162	238	306
	ENSMUSG00000095366.2	Gm21860	-0.878706	2.81062	24.5422	4.00224e-05	0.00312405	146.78	148.5	133.63	57.34	91.45	67.9
	ENSMUSG00000020658.10	Efr3b	-0.770357	3.09745	24.5079	4.03863e-05	0.00314803	174	164	174	89	86	102
	ENSMUSG00000032946.16	Rasgrp2	-0.582846	4.17778	24.4687	4.08064e-05	0.00317208	370	363.29	310	201	242	198
	ENSMUSG00000046490.7	Rnf222	1.86434	2.68829	45.3941	4.08093e-05	0.00317208	43	61	29	113	129	206
	ENSMUSG00000080268.4	Brms1	-0.523427	4.94241	24.4432	4.10825e-05	0.00318884	624.12	637.72	488.94	353.3	425.45	341.85
	ENSMUSG00000001576.15	Ergic1	-0.404212	6.16544	24.4238	4.12929e-05	0.00319176	1495	1247	1216	844	959	950
	ENSMUSG00000020463.15	Ppp4r3b	0.411097	6.21449	24.429	4.12371e-05	0.00319176	1146	983	957	1224	1191	1360
	ENSMUSG00000053641.9	Dennd4a	-0.435725	5.48661	24.4344	4.11781e-05	0.00319176	813	874	796	549	566	579
	ENSMUSG00000040152.8	Thbs1	-0.455594	7.71925	24.3796	4.17784e-05	0.00322479	4274.98	4214	3334	2694	2773.79	2440.93
	ENSMUSG00000021775.11	Nr1d2	0.440322	6.23587	24.3666	4.1923e-05	0.00323146	1108	981	1002	1132	1233	1509
	ENSMUSG00000055172.10	C1ra	-0.428611	7.51824	24.3588	4.20091e-05	0.0032336	3547.52	3684.36	2956.87	2165	2309.41	2496.52
	ENSMUSG00000028557.10	Rnf11	0.593328	6.249	31.7682	4.20848e-05	0.0032344	1112	1016	815	1177	1269	1640
	ENSMUSG00000035168.16	Tanc1	0.412768	7.32149	24.3474	4.21363e-05	0.0032344	2395	2142	2104	2435	2782	2940
	ENSMUSG00000057899.6	Adgrf2	0.966547	2.64252	24.3378	4.22439e-05	0.00323817	79	69	54	96	108	160
	ENSMUSG00000030724.7	Cd19	-0.950268	2.66304	24.2846	4.28431e-05	0.00327957	170	115	111	72	54	61
	ENSMUSG00000015094.16	Npdc1	-0.472273	5.16327	24.2035	4.37755e-05	0.0032868	693.98	662.9	649	374	487.09	476
	ENSMUSG00000020312.12	Shc2	-0.724656	3.45623	24.2475	4.32666e-05	0.0032868	238	209	206	95	127	143
	ENSMUSG00000021903.11	Galnt15	-0.57007	6.29702	30.4863	4.30385e-05	0.0032868	1721	1589	1249	780	935	1112
	ENSMUSG00000023348.11	Trip6	-0.456893	5.27207	24.2558	4.31721e-05	0.0032868	820	740	604	453	500	495
	ENSMUSG00000027380.10	Acoxl	-0.643137	3.7727	24.2165	4.36248e-05	0.0032868	259	257	279	143	165	163
	ENSMUSG00000027708.14	Dcun1d1	0.465427	5.35463	24.234	4.34224e-05	0.0032868	603.71	519.52	536.09	660.5	649.35	803.17
	ENSMUSG00000030994.16	D7Ertd443e	1.75617	0.511398	24.1959	4.38634e-05	0.0032868	14	5	10	27	32	32
	ENSMUSG00000033350.7	Chst2	-0.694459	3.45489	24.2106	4.36926e-05	0.0032868	232	209	206	104	138	127
	ENSMUSG00000035778.17	Ggta1	0.410671	6.94892	24.2032	4.37791e-05	0.0032868	1832	1697	1604	2148	2103	2023
	ENSMUSG00000038056.15	Kmt2c	0.44294	6.30863	24.2375	4.33818e-05	0.0032868	1083.64	1040.27	1114.93	1198.77	1319.74	1557.66
	ENSMUSG00000038895.16	Zfp653	-0.690238	3.7243	24.1949	4.3876e-05	0.0032868	298.81	258	226	119	180	148
	ENSMUSG00000043556.10	Fbxl7	-1.09515	2.05422	24.2366	4.33923e-05	0.0032868	79	99	85	27	45	42
	ENSMUSG00000073423.10	Zfp414	-0.502701	4.73056	24.194	4.38864e-05	0.0032868	527	513	459	300	364	311
	ENSMUSG00000073802.5	Cdkn2b	0.796823	3.15145	24.2169	4.36195e-05	0.0032868	122	109	81	136	171	192
	ENSMUSG00000102660.1	Gm38378	-6.07575	-1.29599	25.0284	4.38591e-05	0.0032868	11.5	5	9	0	0	0
	ENSMUSG00000104371.1	Gm37513	-6.07575	-1.29599	25.0284	4.38591e-05	0.0032868	11.5	5	9	0	0	0
	ENSMUSG00000070547.4	Mrgprb1	0.871654	2.86632	24.1118	4.48557e-05	0.00335485	81	70	94	118	136	162
	ENSMUSG00000026596.13	Abl2	-0.402006	6.19367	24.0919	4.50934e-05	0.00336809	1454	1392	1187	849	952	1010
	ENSMUSG00000026985.1	Il1f8	1.86607	3.36627	55.6217	4.5404e-05	0.00338672	90	83	42	182	235	304
	ENSMUSG00000020125.7	Elane	-2.26078	1.41831	35.5244	4.5505e-05	0.00338736	100	49	53	19	6	13
	ENSMUSG00000090394.8	4930523C07Rik	-0.430538	5.68863	24.0554	4.55348e-05	0.00338736	961.23	1020.5	874.57	668	646.96	635.56
	ENSMUSG00000029314.14	Gpat3	0.915228	3.23125	26.3244	4.61198e-05	0.00342628	124.49	123.83	65.65	176.91	170.29	194.83
	ENSMUSG00000056025.12	Clca3a1	-0.552013	4.36311	23.9982	4.62335e-05	0.00343013	462.41	358.57	358.34	232.88	263.6	241.84
	ENSMUSG00000054146.8	Krt15	-0.426533	8.45805	23.9329	4.70474e-05	0.00348585	6610	6838	6055	4168	4752	4467
	ENSMUSG00000096862.2	Gm13301	-6.0198	-1.33435	24.7358	4.72031e-05	0.00349272	10.65	5.69	8.49	0	0	0
	ENSMUSG00000078131.1	Krtap1-3	5.05357	1.42337	63.8464	4.80554e-05	0.00355103	2	4	1	34	73	121
	ENSMUSG00000030122.12	Ptms	-0.43413	7.85916	23.8298	4.83622e-05	0.00356895	4843	4347	3759	2728	3260	2823
	ENSMUSG00000047757.17	Fancb	0.727159	3.22086	23.8039	4.86992e-05	0.00358904	113	119	104	148	181	185
	ENSMUSG00000042207.17	Kdm5b	0.453673	6.30868	24.2542	4.8901e-05	0.00359913	1139	1082	1014	1114	1376	1607
	ENSMUSG00000036492.12	Rnf39	1.22421	4.39532	48.3896	4.91489e-05	0.00360302	233	238	141	386	395	532
	ENSMUSG00000043262.16	Uevld	0.469687	4.96751	23.7702	4.9141e-05	0.00360302	462.77	389.59	412.73	523.98	530.75	559.78
	ENSMUSG00000050989.9	Selenon	-0.423956	5.43793	23.7773	4.90474e-05	0.00360302	848	802	747	537	580	528
	ENSMUSG00000000957.11	Mmp14	-0.449656	7.91512	23.7555	4.9335e-05	0.00361188	4874	4750	3890	3033	3291	2762
	ENSMUSG00000011877.13	Git1	-0.453	6.72894	23.9215	4.98585e-05	0.00362625	2265	2099	1591	1261	1462	1267
	ENSMUSG00000031849.9	Comp	-0.491215	7.16234	25.3773	4.97413e-05	0.00362625	2885	2568	2638	1533	1644	2143
	ENSMUSG00000032540.16	Abhd5	0.407726	6.45673	23.7195	4.98135e-05	0.00362625	1281.95	1226.89	1142	1295.7	1510.48	1667.04
	ENSMUSG00000034911.8	Ushbp1	-0.602509	4.01977	23.7204	4.98012e-05	0.00362625	303	310	322	168	191	211
	ENSMUSG00000109877.1	Gm45609	1.24881	1.62601	23.7253	4.97358e-05	0.00362625	39.85	26.71	19	49.89	63.83	74.06
	ENSMUSG00000014956.15	Ppp1cb	0.471264	7.18064	24.3637	5.06197e-05	0.0036768	2203	1856	1832	2274	2266	2985
	ENSMUSG00000001946.14	Esam	-0.528085	4.67145	23.6258	5.10833e-05	0.00370435	535	468	447	314	339	271
	ENSMUSG00000031375.17	Bgn	-0.432249	9.81809	23.6222	5.11328e-05	0.00370435	17668	16773	15749	10715	11437	12142
	ENSMUSG00000024011.17	Pi16	-0.776916	7.2508	39.9131	5.12952e-05	0.00371127	3184.7	3171.35	2938.5	1323.42	1598.43	2103.13
	ENSMUSG00000024922.2	Ovol1	1.46444	5.58211	76.7944	5.17596e-05	0.00373816	490.73	409.3	337.83	776.41	1104.4	1271.01
	ENSMUSG00000117284.1	Gm7072	0.63674	4.19386	23.8487	5.18018e-05	0.00373816	292.53	215.48	185.83	353.81	311.43	321.36
	ENSMUSG00000015405.15	Ace2	0.980056	5.45744	48.5026	5.23491e-05	0.00377274	538	507	389	728	786	1091
	ENSMUSG00000035448.9	Ccr3	1.11155	1.83031	23.5034	5.27959e-05	0.00379507	41	37	28	64	61	86
	ENSMUSG00000047907.11	Tshz2	-0.52242	4.91063	23.508	5.273e-05	0.00379507	601	565	542	286	420	394
	ENSMUSG00000003863.18	Ppfia3	0.610495	5.04053	27.4074	5.33744e-05	0.00383168	470	451	341	468	690	618
	ENSMUSG00000019823.17	Mical1	-0.409874	5.66574	23.4181	5.40255e-05	0.00387094	1032.62	939.83	829.28	621.82	683.67	632.95
	ENSMUSG00000020283.5	Pex13	0.466426	5.21672	23.4156	5.40609e-05	0.00387094	555	519	437	580	610	732
	ENSMUSG00000038296.14	Galnt18	-0.511369	4.48358	23.3946	5.43697e-05	0.00388302	466	430	371	265	270	282
	ENSMUSG00000056399.2	Prss34	-2.38696	-0.337314	23.399	5.43047e-05	0.00388302	24	14	15	3	2	4
	ENSMUSG00000078963.3	Hsbp1l1	1.32702	1.6573	23.8392	5.49267e-05	0.00391775	25	37	22	40	78	78
	ENSMUSG00000001542.7	Ell2	0.392284	5.88626	23.3386	5.51993e-05	0.00392708	886	813	774	976	1036	976
	ENSMUSG00000098178.1	Gm42418	0.419045	6.86076	23.3403	5.51736e-05	0.00392708	1915.51	1526.02	1390.18	1857.42	2030.82	2041.5
	ENSMUSG00000116594.1	Gm49601	0.607751	4.29123	23.3178	5.55107e-05	0.00394417	253.7	263.56	229.04	265.02	402.29	386.92
	ENSMUSG00000029381.16	Shroom3	0.660336	3.87275	23.281	5.60673e-05	0.00397622	194	203	150	209	297	292
	ENSMUSG00000091542.1	Gm17167	-1.54446	0.863163	23.2785	5.61051e-05	0.00397622	32.36	45.81	42.04	8	14.85	15
	ENSMUSG00000025085.16	Ablim1	0.452015	8.46282	23.2713	5.62146e-05	0.00397752	4877	4851	4672	5245	5962	7019
	ENSMUSG00000066113.16	Adamtsl1	-0.585023	4.17589	23.2678	5.6267e-05	0.00397752	360	320	359	179	237	225
	ENSMUSG00000027556.15	Car1	-3.78809	-0.929384	23.2555	5.64547e-05	0.00398063	15	6	14	1	1	0
	ENSMUSG00000050756.3	Defb6	0.499004	4.72419	23.2561	5.64458e-05	0.00398063	361	332	361	419	457	501
	ENSMUSG00000024270.11	Slc39a6	0.427985	6.71863	23.2442	5.66291e-05	0.00398786	1623	1490	1244	1554	1806	2038
	ENSMUSG00000038754.5	Elovl3	-0.476639	4.9759	23.2236	5.69457e-05	0.00399999	604	596	563	334	398	439
	ENSMUSG00000040154.11	Wfdc5	0.915352	3.60918	28.5513	5.69388e-05	0.00399999	146	167	95	217	207	283
	ENSMUSG00000030629.15	Zfand6	0.681889	6.44688	35.5842	5.71157e-05	0.00400685	1203	1029	1012	1326	1486	1994
	ENSMUSG00000063019.5	Manbal	-0.529332	4.60528	23.1855	5.75374e-05	0.00403133	517	487	384	283	326	274
	ENSMUSG00000112640.1	Gm32687	0.839397	2.74305	23.174	5.77177e-05	0.00403885	76.16	87.52	65.01	131.39	121.71	123.76
	ENSMUSG00000052572.19	Dlg2	0.67299	4.80137	28.4196	5.83839e-05	0.00408032	371	353	314	400	485	645
	ENSMUSG00000078261.1	Gm11596	4.11627	-0.836479	24.5001	5.9191e-05	0.00413152	2	0	0	5	12	21
	ENSMUSG00000040631.8	Dok4	0.539559	4.71156	23.0507	5.96869e-05	0.00416089	370.85	347.93	312.37	362.57	481.28	540.57
	ENSMUSG00000047867.11	Gimap6	-0.59904	5.50408	28.953	5.97822e-05	0.0041623	988	914	744	573	579	448
	ENSMUSG00000002602.16	Axl	-0.419306	7.93378	23.028	6.0056e-05	0.00417403	4988	4585	3995	3175	3104	3033
	ENSMUSG00000003309.14	Ap1m2	0.459258	5.08439	23.0023	6.04779e-05	0.00417403	498	473	410	502	630	619
	ENSMUSG00000024420.9	Zfp521	-0.511202	4.64545	23.0087	6.03732e-05	0.00417403	456	475	480	293	292	330
	ENSMUSG00000033721.16	Vav3	0.388978	6.28134	23.0036	6.04579e-05	0.00417403	1175	1061	1022	1325	1277	1322
	ENSMUSG00000036985.12	Zdhhc9	0.481912	6.28582	25.1396	6.04119e-05	0.00417403	1155	1128	875	1146	1338	1579
	ENSMUSG00000040488.17	Ltbp4	-0.471202	7.59098	23.6501	6.02997e-05	0.00417403	4068	3417	3369	1916	2599	2718
	ENSMUSG00000106951.1	5930430L01Rik	0.715819	3.56322	23.0197	6.01925e-05	0.00417403	161	116	152	194	204	253
	ENSMUSG00000074604.9	Mgst2	0.511931	4.49535	22.9921	6.06469e-05	0.00418049	330	290	277	398	372	406
	ENSMUSG00000032425.15	Zfp949	0.498453	4.59043	22.9736	6.09537e-05	0.00419641	328	332	302	373	426	456
	ENSMUSG00000036748.16	Cuedc2	-0.494427	4.66728	22.964	6.1113e-05	0.00420216	522.3	456.32	453.49	320.11	313.75	300.32
	ENSMUSG00000067889.6	Sptbn2	0.435084	8.01578	22.9416	6.1489e-05	0.00422278	3968.71	3783	2938.66	4033.93	4710.6	4538.73
	ENSMUSG00000020023.18	Tmcc3	0.439403	6.36633	23.1019	6.20086e-05	0.00424879	1231	1087	1070	1174	1404	1667
	ENSMUSG00000036390.8	Gadd45a	0.60412	3.87947	22.91	6.20212e-05	0.00424879	186.66	199	175.24	229.53	262.91	295.49
	ENSMUSG00000028392.15	Bspry	0.574937	4.20325	22.8989	6.22106e-05	0.00425651	271	250	194	282	360	338
	ENSMUSG00000027699.19	Ect2	0.508956	4.49771	22.8306	6.33833e-05	0.0043314	324	275	299	381	398	399
	ENSMUSG00000020334.6	Slc22a4	0.394974	5.75926	22.8091	6.3756e-05	0.00434081	784	745	730	841	923	978
	ENSMUSG00000058297.16	Spock2	-0.74362	3.09796	22.8112	6.37196e-05	0.00434081	175	165	169	78	101	102
	ENSMUSG00000073791.12	Efcab7	0.987334	2.1072	22.8138	6.36747e-05	0.00434081	41	48	47	73	85	92
	ENSMUSG00000021754.17	Map3k1	0.382128	6.86454	22.7992	6.3929e-05	0.00434725	1733	1665	1499	1880	1997	2000
	ENSMUSG00000001672.14	Marveld3	0.698933	3.28485	22.7764	6.43311e-05	0.00436389	133	106	117	163	187	183
	ENSMUSG00000036814.13	Slc6a20a	0.720991	3.53694	22.7777	6.43075e-05	0.00436389	164.71	156.79	100.94	190.93	211.15	238.06
	ENSMUSG00000036282.15	Naa30	0.492245	4.75079	22.7682	6.4476e-05	0.00436495	411	338	332	443	441	515
	ENSMUSG00000056749.7	Nfil3	-0.517426	4.93662	22.7654	6.45254e-05	0.00436495	642	629	472	371	413	333
	ENSMUSG00000098905.2	Zfp953	0.896795	2.38778	22.7621	6.45831e-05	0.00436495	67.53	55.7	49.66	95.47	101.54	100.78
	ENSMUSG00000030077.11	Chl1	0.416104	6.05453	22.7403	6.49703e-05	0.00438048	1041	943	778	1103	1061	1219
	ENSMUSG00000098248.1	Gm27222	-6.09773	-1.29318	23.4854	6.49709e-05	0.00438048	4.12	8.71	12.63	0	0	0
	ENSMUSG00000052631.15	Sh2d6	-1.1045	1.66011	22.7336	6.50888e-05	0.00438309	73	65	61	27	31	27
	ENSMUSG00000040592.11	Cd79b	-0.947241	2.47752	22.7289	6.51742e-05	0.00438352	132	114	100	67	50	47
	ENSMUSG00000021508.11	Cxcl14	-0.456683	7.13242	23.1801	6.56253e-05	0.00440851	2880	2943	2061	1641	1782	1851
	ENSMUSG00000038271.17	Iffo1	-0.495391	5.03179	22.6406	6.67721e-05	0.00448012	589	641	609	419	423	361
	ENSMUSG00000001435.15	Col18a1	-0.422492	6.93495	22.5937	6.76396e-05	0.00452736	2555	2175	2061	1466	1762	1432
	ENSMUSG00000026131.20	Dst	0.441156	9.31311	22.5959	6.75987e-05	0.00452736	8754.75	8568.85	8729.84	9545.49	11466.5	11735
	ENSMUSG00000034926.3	Dhcr24	-0.451291	8.5995	22.5872	6.77611e-05	0.00453002	7238	6876	7497	4178	5187	5287
	ENSMUSG00000030410.16	Dmwd	-0.501031	4.66259	22.5817	6.78637e-05	0.00453141	538	474	420	265	329	338
	ENSMUSG00000038217.13	Tlcd2	-0.665841	3.59043	22.554	6.83833e-05	0.00456061	229.07	230.14	245	116.04	140	155.1
	ENSMUSG00000039994.15	Timeless	-0.475968	5.0155	22.5174	6.90755e-05	0.00459262	707	572	540	387	440	374
	ENSMUSG00000040471.17	Ggt6	0.506552	4.58365	22.5155	6.91118e-05	0.00459262	342	291	321	372	426	454
	ENSMUSG00000056174.8	Col8a2	-0.794705	3.54652	24.103	6.90729e-05	0.00459262	228	200	276	103	124	150
	ENSMUSG00000063894.15	Zkscan8	0.54099	4.69619	22.5098	6.92208e-05	0.00459436	333	309	372	427	425	514
	ENSMUSG00000043822.18	Adamtsl5	-0.47325	4.90397	22.5048	6.93164e-05	0.0045952	575	543	556	322	384	409
	ENSMUSG00000063767.4	S100a7a	2.0557	1.30275	30.8948	6.95119e-05	0.00460265	11	16	17	28	59	85
	ENSMUSG00000021493.15	Pdlim7	-0.453022	5.27751	22.4736	6.99152e-05	0.00461634	802	731	634	408	541	510
	ENSMUSG00000030471.17	Zdhhc13	0.471502	4.7471	22.4735	6.99165e-05	0.00461634	402	357	328	424	466	498
	ENSMUSG00000038604.9	Ripor1	-0.4038	5.58704	22.4708	6.99686e-05	0.00461634	940	889	815	564	669	609
	ENSMUSG00000020167.14	Tcf3	-0.400638	5.73548	22.4465	7.04397e-05	0.0046419	1072	999	862	638	736	670
	ENSMUSG00000020130.9	Tbc1d15	0.421408	5.34008	22.4278	7.08049e-05	0.00466043	591	551	530	627	680	759
	ENSMUSG00000066278.6	Vps37b	-0.568091	4.79964	23.7653	7.11487e-05	0.0046775	606.73	587.45	414.8	334.68	361.19	298.23
	ENSMUSG00000026220.6	Slc16a14	0.558126	4.32626	22.3746	7.18529e-05	0.00471565	280	222	278	345	355	360
	ENSMUSG00000111837.1	Gm47135	1.33499	1.1754	22.3723	7.18992e-05	0.00471565	22	17	20	39	38	61
	ENSMUSG00000021186.9	Fbln5	-0.448094	5.33952	22.3629	7.20864e-05	0.00471676	788	696	766	447	508	570
	ENSMUSG00000035914.11	Cd276	-0.452909	4.88741	22.3648	7.20472e-05	0.00471676	593.09	533	521.91	355.48	365	388.67
	ENSMUSG00000036596.6	Cpz	-1.25686	1.55268	22.3519	7.23063e-05	0.00472557	77	50	63	22	18	33
	ENSMUSG00000055799.13	Tcf7l1	-0.627474	3.95414	22.3373	7.25976e-05	0.00473902	356	266	282	153	172	214
	ENSMUSG00000027765.6	P2ry1	0.490804	4.67671	22.3287	7.27712e-05	0.0047415	352	317.45	354.1	419.1	456.85	452.13
	ENSMUSG00000029207.16	Apbb2	-0.506977	4.71441	22.3269	7.28066e-05	0.0047415	490	496	494	274	322	368
	ENSMUSG00000055013.16	Agap1	-0.491059	5.18316	22.4014	7.30327e-05	0.00475064	730	684	634	370	431	545
	ENSMUSG00000014846.12	Tppp3	-0.593805	7.10155	29.429	7.36328e-05	0.00478406	2938	3030	2058	1689	1626	1552
	ENSMUSG00000030782.16	Tgfb1i1	-0.488466	4.82609	22.2405	7.45707e-05	0.00483933	557	558	481	296	398	356
	ENSMUSG00000023191.9	P3h3	-0.521787	4.50688	22.2252	7.48883e-05	0.00485425	419	409	456	266	276	285
	ENSMUSG00000028996.9	Rbp7	0.81421	3.04393	22.1586	7.62852e-05	0.00493902	109	105	73	123	151	191
	ENSMUSG00000015605.6	Srf	-0.419168	5.52537	22.1015	7.7507e-05	0.00501199	925	891	733	523	638	594
	ENSMUSG00000044103.4	Il1f9	1.76538	4.41779	67.6089	7.76743e-05	0.00501199	184	184	104	422	440	612
	ENSMUSG00000048100.13	Taf13	0.401117	5.78725	22.0933	7.76835e-05	0.00501199	857.5	729.85	715.35	820.16	969.84	1014.35
	ENSMUSG00000031558.15	Slit2	-0.493161	4.46982	22.0764	7.805e-05	0.00502393	450	416	381	268	270	277
	ENSMUSG00000034579.17	Pla2g3	0.988666	2.03108	22.0801	7.79699e-05	0.00502393	45.31	40.64	43.24	66.37	78.25	93.35
	ENSMUSG00000039782.15	Cpeb2	0.435226	5.78309	22.0712	7.81636e-05	0.00502541	818	741	705	822	884	1119
	ENSMUSG00000021123.12	Rdh12	0.388479	6.10101	22.06	7.84079e-05	0.00502945	1061	952	866	1022	1195	1256
	ENSMUSG00000073599.10	Ecscr	-0.540386	4.50963	22.0611	7.83824e-05	0.00502945	472	440	388	298	284	238
	ENSMUSG00000064201.8	Krt2	0.562023	13.0017	23.5862	7.89147e-05	0.00505611	123484	117817	81373	125552	150742	161081
	ENSMUSG00000063160.12	Numbl	-0.44408	4.99704	22.0198	7.92894e-05	0.00507425	643	578	554	359	410	434
	ENSMUSG00000022994.9	Adcy6	-0.384139	6.62796	21.9837	8.00928e-05	0.00511975	1909.58	1919.32	1591.98	1183.62	1338.77	1301.77
	ENSMUSG00000037933.16	Bicd2	0.392268	7.48283	21.9634	8.05476e-05	0.00514289	2621	2638	2233	2847	3035	3174
	ENSMUSG00000036995.7	Asap3	-0.476789	4.98144	21.9298	8.13057e-05	0.00518532	641	639	496	341	434	400
	ENSMUSG00000038151.13	Prdm1	0.919048	5.10518	40.0927	8.15786e-05	0.00519078	432	424	299	534	656	822
	ENSMUSG00000051043.16	Gprc5c	-0.553901	4.15587	21.9212	8.15018e-05	0.00519078	360	339	319	185	208	247
	ENSMUSG00000028655.11	Mfsd2a	-0.493516	5.16385	22.1695	8.18306e-05	0.00519644	810	676	546	374	463	489
	ENSMUSG00000063488.6	Zkscan7	0.655845	3.92378	22.0601	8.18551e-05	0.00519644	172.03	168	223.3	261.3	274.3	287.99
	ENSMUSG00000085020.1	2310081O03Rik	1.71656	0.491623	21.9008	8.19677e-05	0.00519763	5	14	10	30	27	32
	ENSMUSG00000035868.9	Zfp983	0.777227	2.91881	21.8921	8.2167e-05	0.00520432	108.88	77.77	80.36	142.98	141.53	135.45
	ENSMUSG00000039879.9	Heca	0.39791	6.1748	21.8635	8.28256e-05	0.00524004	1112	981	925	1107	1171	1386
	ENSMUSG00000030793.4	Pycard	0.389086	6.93325	21.8537	8.30538e-05	0.00524849	1763.17	1722.46	1629.55	2087.4	2093.14	1988.14
	ENSMUSG00000030770.15	Parva	-0.400207	6.59595	21.8485	8.3175e-05	0.00525016	1836	1762	1717	1093	1217	1412
	ENSMUSG00000020785.17	Camkk1	0.403878	5.84193	21.8335	8.35253e-05	0.00526627	837	816	734	824	1022	1071
	ENSMUSG00000058070.14	Eml1	-0.503145	4.9854	21.8061	8.41673e-05	0.00530072	558.89	580.96	640.89	333.98	398	433.82
	ENSMUSG00000032872.16	Cyb5r4	0.384911	5.94565	21.7987	8.4342e-05	0.0053057	979.48	839.28	771.95	991.19	1027.37	1091.4
	ENSMUSG00000029369.17	Afm	-5.96362	-1.37353	22.4821	8.45126e-05	0.0053104	11	4	9	0	0	0
	ENSMUSG00000028115.16	Bnipl	0.48973	5.7631	23.9696	8.53399e-05	0.00535631	841.81	776.19	575.54	808.78	966.05	1057.36
	ENSMUSG00000044646.15	Zbtb7c	0.42051	5.87857	21.7119	8.642e-05	0.00541797	941	807	693	852	1098	1057
	ENSMUSG00000029810.15	Tmem176b	-0.421203	5.73132	21.7017	8.66693e-05	0.00542746	1059	1030	853	708	682	626
	ENSMUSG00000025277.14	Abhd6	0.634757	3.82651	21.6691	8.7466e-05	0.00547107	177	196	161	222	235	309
	ENSMUSG00000044783.16	Hjurp	0.403531	7.99818	21.6639	8.7593e-05	0.00547107	3765	3321	3554	4003	4557	4436
	ENSMUSG00000063171.4	Rps4l	-0.613932	3.82531	21.6611	8.76619e-05	0.00547107	309	253	260	161	186.97	146
	ENSMUSG00000004771.12	Rab11a	0.393542	6.92522	21.6381	8.82302e-05	0.005488	1917.52	1731.92	1449.18	1943.53	2028.32	2181
	ENSMUSG00000024247.14	Pkdcc	-0.668014	3.55343	21.6407	8.81673e-05	0.005488	264	198	227	113	135	152
	ENSMUSG00000057894.10	Zfp329	0.5743	4.25812	21.6447	8.80681e-05	0.005488	228	246	263	323	310	383
	ENSMUSG00000032431.6	Crtap	-0.401073	5.67773	21.6003	8.91732e-05	0.00553423	1024	870	918	588	700	677
	ENSMUSG00000047417.18	Rexo1	-0.405408	6.33239	21.6019	8.9133e-05	0.00553423	1612	1559	1277	931	1169	991
	ENSMUSG00000059022.15	Kcp	-1.00156	2.04328	21.5138	9.13724e-05	0.00566437	94	72	90	33	38	47
	ENSMUSG00000020330.16	Hmmr	0.484649	4.95671	21.4869	9.20693e-05	0.0057012	434	375	437	562	515	530
	ENSMUSG00000022286.16	Grhl2	0.380624	5.97045	21.4764	9.23419e-05	0.0057117	946	845	842	950	1072	1141
	ENSMUSG00000114780.1	AI197445	1.56024	0.798366	21.4437	9.31987e-05	0.00575827	19	9	12	35	25	49
	ENSMUSG00000019761.10	Krt10	0.50605	13.1849	21.4337	9.34614e-05	0.00576806	143357	135245	96150.3	147921	170616	169614
	ENSMUSG00000092178.2	Gm45351	0.763402	3.32176	21.4651	9.43633e-05	0.00581725	106.04	126.57	121.39	195.11	146.58	212.77
	ENSMUSG00000066867.8	Oas1e	1.79599	0.124939	21.3887	9.4659e-05	0.005829	6	10	5	23	24	21
	ENSMUSG00000022330.5	Osr2	-0.768038	2.91566	21.3764	9.49889e-05	0.00584282	153	164	134	75	74	95
	ENSMUSG00000001844.10	Zdhhc4	-0.456611	4.84859	21.3676	9.52254e-05	0.00584629	590	517	500	326	397	356
	ENSMUSG00000014164.15	Klhl3	-1.03798	2.02001	21.3664	9.52563e-05	0.00584629	76	83	94	36	31	47
	ENSMUSG00000013921.15	Clip3	-0.741159	3.36431	21.3458	9.58145e-05	0.00587404	227	176	211	83	128	129
	ENSMUSG00000037552.17	Plekhg2	-0.419936	6.17255	21.3343	9.61276e-05	0.00588672	1425	1387	1182	898	1038	809
	ENSMUSG00000021943.7	Gdf10	-0.551493	5.28087	24.622	9.75288e-05	0.00596594	833	705	694	364	476	567
	ENSMUSG00000051331.15	Cacna1c	-0.632478	3.73173	21.2548	9.83165e-05	0.0060075	236	272	262	136	149	175
	ENSMUSG00000067925.4	Rtl8a	-0.556554	4.30516	21.2388	9.87648e-05	0.00602825	424.8	406.35	304.33	198.43	249.17	262.86
	ENSMUSG00000018800.14	Abca5	0.691162	3.39081	21.1339	0.000101751	0.00619003	153	125	108	157	195	222
	ENSMUSG00000049804.9	Armcx4	-0.535946	4.18891	21.1408	0.000101552	0.00619003	356	355	325	188	224	248
	ENSMUSG00000074829.10	2010315B03Rik	0.570338	4.11939	21.1373	0.000101651	0.00619003	223	209	239	313	281	326
	ENSMUSG00000019726.12	Lyst	0.39459	5.71434	21.1053	0.000102582	0.0062338	761	756	675	832	978	846
	ENSMUSG00000038598.9	Shoc1	2.6625	-0.304713	22.2814	0.000104017	0.00631404	4	5	0	21	12	21
	ENSMUSG00000030666.11	Calcb	1.42066	1.06617	21.0489	0.000104243	0.00632085	16	19	17	24	55	51
	ENSMUSG00000041653.5	Pnpla3	0.823887	2.71954	21.0348	0.000104664	0.00633942	77	69	80	97.81	128.67	143.75
	ENSMUSG00000024914.16	Drap1	-0.391062	5.8924	21.0083	0.000105458	0.00638055	1210	1133	922	731	808	748
	ENSMUSG00000032024.10	Clmp	-0.435031	5.40628	20.9957	0.000105837	0.00639649	791.86	891.42	670.59	525.16	551.49	525.61
	ENSMUSG00000078816.9	Prkcg	-0.920639	2.27035	20.9886	0.000106051	0.00640243	118	99	80	41	47	56
	ENSMUSG00000001376.17	Vps50	0.422554	5.08027	20.9818	0.000106259	0.00640802	508	448	440	554	566	603
	ENSMUSG00000061981.14	Flot2	-0.535058	6.10167	26.0502	0.000106614	0.00641548	1453	1389	1096	848	933	711
	ENSMUSG00000090698.2	Apold1	-0.707807	3.32361	20.972	0.000106554	0.00641548	229	179	185	120	119	94
	ENSMUSG00000004127.12	Trmt10a	0.668749	3.25183	20.9349	0.00010769	0.00647317	130.73	119.85	102.18	167.97	167.87	180
	ENSMUSG00000055148.7	Klf2	-0.456939	5.24732	20.9244	0.000108015	0.00647871	817	757	556	449	493	481
	ENSMUSG00000073940.3	Hbb-bt	-1.20095	4.67375	46.2506	0.000108015	0.00647871	560.09	525.47	617.63	176.06	210.95	301.25
	ENSMUSG00000004885.5	Crabp2	0.42486	5.46683	20.9198	0.000108157	0.00648018	693	639	499	682	768	809
	ENSMUSG00000026814.16	Eng	-0.558312	6.62349	27.0818	0.000109652	0.00656265	2067	1907	1711	1273	1289	979
	ENSMUSG00000020810.5	Cygb	-0.535128	5.36554	24.0339	0.000110112	0.00658309	849.93	773.9	730.62	396.93	488	616.9
	ENSMUSG00000033765.5	Calm4	0.842848	9.99672	36.255	0.000110596	0.00660489	13764	13346	8554	17226	19160.9	22254
	ENSMUSG00000027487.11	Cdk5rap1	0.675915	3.31161	20.826	0.000111098	0.0066277	118	117	130	178	174	187
	ENSMUSG00000054641.10	Mmrn1	-0.489801	4.78871	20.821	0.000111258	0.00663016	512	490	547	355	332	331
	ENSMUSG00000001424.14	Snd1	-0.420779	6.56982	20.9445	0.000111393	0.00663103	1943	1800	1527	1288	1244	1076
	ENSMUSG00000030137.8	Tuba8	0.423956	5.47974	20.7942	0.000112116	0.00664773	680.68	625.46	538.93	657.22	753.16	870.99
	ENSMUSG00000034171.13	Faah	0.581264	5.14864	24.8772	0.000111804	0.00664773	463	513	397	489	692	719
	ENSMUSG00000053522.11	Lgals7	0.463109	8.70511	21.181	0.000112079	0.00664773	6609	6102	4378	6683	7631	7277
	ENSMUSG00000060166.6	Zdhhc8	-0.44689	5.24991	20.793	0.000112153	0.00664773	782	637	698	411	540	483
	ENSMUSG00000033209.17	Ttc28	-0.510777	4.69363	20.7884	0.000112303	0.00664949	467	480	511	264	327	358
	ENSMUSG00000067928.6	Zfp760	0.743356	3.65989	22.3643	0.000112971	0.00668191	140	127	184	218	222	261
	ENSMUSG00000054753.9	AU018091	2.30258	-0.0285773	21.924	0.000113263	0.00669208	9	3	2	12	20	33
	ENSMUSG00000022438.6	Parvb	-0.412549	5.5091	20.7413	0.000113829	0.00671833	970	814	734	530	639	570
	ENSMUSG00000019102.10	Aldh3a1	-0.37861	5.70437	20.7035	0.000115072	0.00677111	1053	928	869	654	695	667
	ENSMUSG00000026179.14	Pnkd	0.410914	5.41924	20.7104	0.000114845	0.00677111	642.62	589.62	543	618.82	769.47	791
	ENSMUSG00000030792.8	Dkkl1	0.872636	4.55857	32.419	0.00011509	0.00677111	316	302	190	378	448	533
	ENSMUSG00000046056.15	Sbsn	0.822995	9.7709	35.3961	0.000115797	0.00680551	11220.6	11751.8	7727.6	13373.5	18057.7	18564
	ENSMUSG00000048047.3	Zbtb33	0.511084	4.57289	20.6675	0.000116269	0.00682126	314.74	313	316	433	365	442
	ENSMUSG00000078515.4	Ddi2	0.391246	7.46638	20.6662	0.000116311	0.00682126	2539.85	2390.18	2459.67	2641.12	3109.17	3214.42
	ENSMUSG00000081049.1	Rps24-ps3	0.420464	5.11249	20.6594	0.00011654	0.00682746	492.05	462.33	471.84	550.26	587.96	624.05
	ENSMUSG00000072680.11	Tmem254c	-0.575658	5.70856	26.8131	0.00011719	0.00685828	1185.96	888.04	954.24	526.49	595.57	750.87
	ENSMUSG00000114452.1	A530001N23Rik	1.40595	0.919182	20.6085	0.00011826	0.00691358	17	10	20	31	41	44
	ENSMUSG00000014329.14	Bicc1	-0.552018	5.89255	26.2853	0.000118693	0.0069316	1197.79	1114.77	1096.34	611.81	645.79	890.52
	ENSMUSG00000030264.14	Thumpd3	0.384491	5.49937	20.5801	0.00011923	0.00695564	683.08	615.85	596.94	712.17	767.82	800.78
	ENSMUSG00000067001.11	Serpinb7	1.16949	5.43316	52.6833	0.000119424	0.00695962	501	422	367	715	811	1149
	ENSMUSG00000034724.18	Cnot6l	0.404856	6.12827	20.5593	0.000119949	0.0069777	1069	922	921	1127	1068	1356
	ENSMUSG00000059839.9	Zfp874b	0.719026	3.19249	20.5582	0.000119986	0.0069777	129.64	90.63	110.25	141.3	177.41	185.03
	ENSMUSG00000044433.16	Camsap3	0.398058	6.42468	20.5453	0.000120432	0.0069963	1303.87	1193.6	1091.23	1197.05	1557.7	1611.69
	ENSMUSG00000027589.14	Pcmtd2	0.479981	5.25537	21.2058	0.000121033	0.00702385	499	471	563	580	666	737
	ENSMUSG00000025978.14	Rftn2	-0.723836	3.25093	20.5202	0.00012131	0.00703254	174.9	197.84	189.78	83.51	104.13	127.54
	ENSMUSG00000017607.9	Tns4	0.414151	8.06825	20.4853	0.000122538	0.0070889	4301	3767	3118	4035	4873	4793
	ENSMUSG00000022270.16	Retreg1	0.589851	5.82998	27.7857	0.000122449	0.0070889	805	707	685	846	940	1268
	ENSMUSG00000014599.10	Csf1	-0.542547	7.67902	25.0663	0.000123061	0.00711012	4411	4184	3210	2515	2775	2135
	ENSMUSG00000031523.16	Dlc1	-0.412988	5.90892	20.4641	0.00012329	0.00711012	1117	1117	1075	687	710	900
	ENSMUSG00000044313.13	Mab21l3	0.641731	3.45108	20.466	0.000123221	0.00711012	143	125	141	191	186	212
	ENSMUSG00000047446.18	Arl4a	0.371909	6.11394	20.4576	0.00012352	0.00711602	1092	925	906	1064	1164	1256
	ENSMUSG00000058446.14	Znrf2	0.376746	6.33573	20.4385	0.000124205	0.00714807	1183	1062	1147	1238	1370	1462
	ENSMUSG00000022220.14	Adcy4	-0.583326	4.50721	21.7377	0.000124398	0.00715175	482	427	404	278	313	214
	ENSMUSG00000022552.16	Sharpin	-0.400904	5.92459	20.4293	0.000124534	0.00715215	1233	1134	979	779	845	703
	ENSMUSG00000046834.7	Krt1	0.482831	11.8921	20.4073	0.000125331	0.00719045	58546	55252	40509	57563	67006	73550
	ENSMUSG00000021701.8	Plk2	0.420897	5.42932	20.3946	0.000125792	0.00720944	685	613	489	707	775	713
	ENSMUSG00000032068.14	Plet1	0.602777	3.93398	20.3864	0.000126089	0.007219	209.9	174.92	198	228	262	328.89
	ENSMUSG00000060657.8	Marf1	0.373856	6.71796	20.3802	0.000126319	0.00722467	1484	1450	1490	1699	1767	1829
	ENSMUSG00000050520.4	Cldn8	1.1291	1.94114	20.7612	0.000126575	0.0072319	39	29	45	56	69	105
	ENSMUSG00000026235.14	Epha4	0.493643	4.86931	20.3628	0.000126956	0.00723874	407	364	398	450	466	606
	ENSMUSG00000073485.3	H3f3aos	1.8663	-0.0900878	20.3629	0.000126951	0.00723874	5	6	6	22	20	16
	ENSMUSG00000032492.14	Pth1r	-0.585234	4.0694	20.309	0.000128951	0.00734492	342	328	297	149	218	229
	ENSMUSG00000041378.2	Cldn5	-0.599642	3.77736	20.2954	0.000129461	0.00736636	319	246	229	166	157	157
	ENSMUSG00000034664.13	Itga2b	-0.745914	3.4688	21.0384	0.000130979	0.00744511	276	218	172	142	107	113
	ENSMUSG00000002105.15	Slc39a13	-0.395277	5.45142	20.2224	0.000132234	0.00749375	846	753.65	795.92	526.55	594.61	559
	ENSMUSG00000046589.7	Lrrc8e	0.61542	4.58953	23.0816	0.00013224	0.00749375	374	323	226	364	476	458
	ENSMUSG00000111390.1	Gm48796	-1.12492	1.4647	20.2232	0.000132203	0.00749375	55.2	60.84	56.5	25.17	26.28	21.88
	ENSMUSG00000043286.12	Pnpla1	0.776608	5.31725	33.4347	0.000132593	0.00750605	538	514	374	586	773.76	890.91
	ENSMUSG00000062433.3	Krtap6-2	5.67268	2.85552	95.4829	0.000135821	0.00768098	4	3	6	109	216	311
	ENSMUSG00000028641.16	P3h1	-0.47279	4.60638	20.0997	0.00013704	0.00774198	517	430	418	265	329	312
	ENSMUSG00000013419.7	Zfp651	-0.497331	5.17263	21.2598	0.000137608	0.00776615	726	668	642	363	422	548
	ENSMUSG00000022687.12	Boc	-0.367391	5.79876	20.0574	0.000138742	0.0078222	1099	994	938	664	725	776
	ENSMUSG00000026385.16	Dbi	0.408302	7.31187	19.9966	0.000141224	0.00795407	2360	2216	2035	2242	2740	3123.99
	ENSMUSG00000045838.8	Ccdc9b	0.530658	5.60931	24.0219	0.000142455	0.00801524	619	664	641	676	901	1002
	ENSMUSG00000024304.14	Cdh2	-0.652819	3.29275	19.9617	0.000142675	0.00801657	201	192	178	98	110	127
	ENSMUSG00000049044.16	Rapgef4	0.571221	4.17906	19.9594	0.000142768	0.00801657	279	240	186	272.93	313	376.95
	ENSMUSG00000027401.9	Tgm3	0.379925	8.24149	19.9479	0.000143251	0.00803553	4590	4205	3944	4841	5018	5407
	ENSMUSG00000002059.18	Rab34	-0.491868	4.49049	19.9069	0.000144978	0.00810782	439	442	383	230	301	299
	ENSMUSG00000002504.15	Slc9a3r2	-0.547248	4.12685	19.9099	0.000144853	0.00810782	353	354	290	178	245	206
	ENSMUSG00000073755.4	5730409E04Rik	-0.439245	5.01134	19.9113	0.000144793	0.00810782	633	644	515	368	447	402
	ENSMUSG00000020642.13	Rnf144a	-0.599943	3.71048	19.8957	0.000145454	0.00812619	280	249	227	159	134	165
	ENSMUSG00000031776.17	Arl2bp	-0.390503	5.61869	19.8898	0.000145707	0.00813218	970	964	763	608	646	637
	ENSMUSG00000035597.19	Prpf39	0.3665	6.13715	19.8703	0.000146542	0.00817053	1090.25	954.67	930.21	1077.25	1163.38	1294.65
	ENSMUSG00000022228.14	Zscan26	0.387803	6.54827	19.8415	0.000147782	0.00821652	1321.96	1225.42	1362.19	1407.76	1624.88	1701.65
	ENSMUSG00000026754.16	Golga1	0.381948	5.85138	19.8409	0.000147812	0.00821652	838	775	806	848	1008	1059
	ENSMUSG00000051481.5	Krtap31-2	4.84993	-0.892601	23.3891	0.000147783	0.00821652	0	0	1	3.78	8.22	25.37
	ENSMUSG00000023495.13	Pcbp4	-0.517153	4.52875	19.7871	0.000150163	0.00833889	495	422	393	228	336	280
	ENSMUSG00000004044.9	Cavin1	-0.38393	8.26674	19.7634	0.00015121	0.00838862	6254	5740	4925	3738	4117	4066
	ENSMUSG00000038068.15	Rnf144b	0.353661	6.10208	19.7554	0.000151567	0.00839999	1048	978	892	1064	1200	1171
	ENSMUSG00000027377.2	Mall	0.438656	5.19928	19.7425	0.000152142	0.00842346	587	483	441	531	654	701
	ENSMUSG00000078130.4	Gm11555	5.81396	-1.53776	20.3151	0.000152411	0.00842993	0	0	0	3	7	10
	ENSMUSG00000021144.14	Mta1	-0.403827	5.60697	19.7213	0.000153092	0.00845912	1034	865	789	554	700	615
	ENSMUSG00000022742.6	Cpox	0.466226	4.87612	19.6952	0.000154275	0.00851599	456	367.78	368.37	421.04	528.02	570.43
	ENSMUSG00000048280.18	Zfp738	0.560642	4.17187	19.6918	0.000154429	0.00851604	231.01	205	261.89	318.03	305.37	328.97
	ENSMUSG00000026835.15	Fcnb	-1.78086	0.0703119	19.6858	0.000154703	0.00852263	23	20	25	7	7	4
	ENSMUSG00000067597.5	Dgat2l6	0.460748	4.61725	19.6777	0.000155071	0.00853445	350	321	324	370	457	438
	ENSMUSG00000027243.8	Harbi1	0.65986	3.32271	19.6734	0.000155265	0.00853667	144	107	121.12	176	170.12	195
	ENSMUSG00000034520.14	Gjc1	-0.641842	3.4296	19.6659	0.00015561	0.00854714	228	220	180	117	141	112
	ENSMUSG00000037126.16	Psd	-0.779475	2.86778	19.6531	0.0001562	0.00857103	150.43	171.9	116.4	84.33	70.43	79.54
	ENSMUSG00000017446.14	C1qtnf1	-0.580881	4.73439	22.132	0.000157562	0.00863725	552.5	476.25	506.16	272.73	276.05	399.06
	ENSMUSG00000028469.15	Npr2	-0.478886	5.19158	20.3633	0.000158524	0.0086814	688	652	706	381.5	435	543.14
	ENSMUSG00000034917.8	Tjp3	0.465874	4.87915	19.5798	0.000159608	0.00873214	407	435	351	437	499	585
	ENSMUSG00000060962.12	Dmkn	0.949338	9.76772	39.3363	0.000160214	0.00875661	10721	11188	7057	14209	17486	19716
	ENSMUSG00000031608.13	Galnt7	0.397576	5.20191	19.5519	0.00016093	0.00878712	548	490	495	585	623.98	653
	ENSMUSG00000026577.13	Blzf1	0.449531	5.57648	20.3981	0.000161441	0.00880631	654	663	629	666	820.98	974
	ENSMUSG00000032238.17	Rora	0.644728	7.32549	29.0447	0.000161646	0.00880884	2177	2069	1817	2331	2774	3655
	ENSMUSG00000048126.16	Col6a3	-0.385608	8.44083	19.4971	0.000163558	0.00890428	6384	6416	6213	4320	4404	4710
	ENSMUSG00000059824.12	Dbp	0.455718	5.29457	19.8237	0.000163939	0.00891623	601.72	525.24	475.47	547.79	678.22	800.68
	ENSMUSG00000037071.3	Scd1	-0.412721	10.2992	19.4836	0.000164213	0.00892239	24366.5	22697	22534.9	14115.8	16376.6	17827.9
	ENSMUSG00000011256.16	Adam19	-0.366965	6.01009	19.4432	0.000166185	0.00900307	1207.16	1197.05	1100.95	831.88	879.66	791
	ENSMUSG00000078495.10	Zfp984	0.720612	4.45847	25.3109	0.000166153	0.00900307	342.3	238.39	225.02	458.66	360.07	391.6
	ENSMUSG00000098318.7	Lockd	0.696267	3.0375	19.4441	0.000166142	0.00900307	117	89	94	131.83	160.54	155
	ENSMUSG00000095128.2	Gm5709	-1.01196	1.91894	19.4173	0.000167465	0.00906356	94	86	56	34	42	31
	ENSMUSG00000114203.1	Gm35279	4.18911	-1.36725	19.3942	0.000168614	0.00911685	1	0	0	6	7	10
	ENSMUSG00000022408.7	Fam83f	0.388175	5.56601	19.389	0.000168878	0.00912222	760.47	626.49	601.21	755.54	860.08	775.17
	ENSMUSG00000014602.15	Kif1a	-0.745478	2.94303	19.3778	0.000169439	0.00913041	173	149	136	80	101	70
	ENSMUSG00000030340.16	Scnn1a	0.503849	4.611	19.3787	0.000169393	0.00913041	359	363	256	383	414	478
	ENSMUSG00000038633.5	Degs1	0.423834	8.16588	19.3761	0.000169524	0.00913041	4624	4055	3252	4358	4799	5545
	ENSMUSG00000070604.5	Vsig10l	0.501525	4.60455	19.3249	0.00017212	0.00926125	369.63	327.81	276	343	438	490.24
	ENSMUSG00000036499.9	Eea1	0.360494	5.86896	19.2987	0.000173466	0.00932458	846	839	786	904	970	1054
	ENSMUSG00000073400.6	Trim10	-4.33409	-1.14907	19.2861	0.000174113	0.00935031	3	14	12	0	1	0
	ENSMUSG00000015837.15	Sqstm1	-0.38554	7.89399	19.2762	0.000174627	0.00936882	4877.26	4504.95	3698.72	2925.91	3241.86	3028.35
	ENSMUSG00000042644.9	Itpr3	0.386279	7.9047	19.2644	0.000175243	0.00938372	3635.98	3541.99	2897.98	3611.96	4361.91	4152.98
	ENSMUSG00000045333.15	Zfp423	-0.654326	3.3129	19.2649	0.000175215	0.00938372	213	190	177	91	120	129
	ENSMUSG00000034112.9	Atp2c2	0.694522	3.14972	19.2538	0.000175796	0.00940426	117	119	89	134	186	165
	ENSMUSG00000056043.5	Rgs9bp	1.29413	0.973199	19.2425	0.000176388	0.00942683	20	20	12	30	41	47
	ENSMUSG00000027347.18	Rasgrp1	0.387826	5.37551	19.207	0.000178261	0.00951181	617	575	545	641	683	772
	ENSMUSG00000058368.3	Krtap21-1	4.67806	2.62856	76.9869	0.000178322	0.00951181	9	8	5	93	163	276
	ENSMUSG00000029422.15	Rsrc2	0.367837	6.28699	19.1865	0.00017935	0.00955743	1110	1092	1088	1139	1392	1397
	ENSMUSG00000035498.10	Cdcp1	0.351782	6.31299	19.1825	0.000179564	0.00955968	1219	1130	1032	1184	1388	1406
	ENSMUSG00000021922.17	Itih4	-2.94039	-0.843593	19.1685	0.000180315	0.0095686	13	12	11	2	0	2
	ENSMUSG00000028214.13	Gem	-0.527262	3.99008	19.1665	0.000180422	0.0095686	335	309	258	185	201	189
	ENSMUSG00000067219.9	Nipal1	1.2099	4.22965	39.1403	0.000180339	0.0095686	221	190	138	305	352	512
	ENSMUSG00000070923.4	Klhl9	0.412531	5.55103	19.1755	0.000179942	0.0095686	675	580	683	720	791	874.78
	ENSMUSG00000026728.9	Vim	-0.461227	10.6129	19.2899	0.000181267	0.00959616	32068	30616	25361	20779	20968	16864
	ENSMUSG00000041225.16	Arhgap12	0.386007	5.71649	19.1505	0.000181288	0.00959616	791	697	714	811	842	1002
	ENSMUSG00000006476.19	Nsmf	-0.409719	5.14109	19.1423	0.000181732	0.00961044	674	663	604	391	491	467
	ENSMUSG00000043079.17	Synpo	-0.361259	6.43468	19.1323	0.000182274	0.00962994	1755	1535	1421	989	1205	1185
	ENSMUSG00000039706.11	Ldb2	-0.606019	3.66618	19.1279	0.000182513	0.00963339	249	225	257	136	137	171
	ENSMUSG00000032014.6	Oaf	-0.490347	4.38861	19.1241	0.000182722	0.00963525	401	415	360	268	263	239
	ENSMUSG00000023827.8	Agpat4	0.400435	5.68106	19.0911	0.000184527	0.009711	821	739	586	765	904	935
	ENSMUSG00000032470.17	Mras	-0.506058	4.27686	19.0935	0.000184394	0.009711	388	343	361	211	227	272
	ENSMUSG00000048521.8	Cxcr6	0.597979	3.81857	19.0883	0.000184684	0.009711	167	194	177	264	268	219
	ENSMUSG00000025854.15	Fam20c	-0.525259	4.02208	19.0838	0.000184929	0.00971466	323	298	298	183	186	220
	ENSMUSG00000056999.15	Ide	0.857968	7.60664	37.5005	0.000185907	0.00975679	2477	2323	1926	2929	3589	4737
	ENSMUSG00000011884.13	Gltp	0.444466	8.7646	19.4074	0.000186291	0.00976765	7070	6122	4748	6426	7840	8153
	ENSMUSG00000024957.9	Kcnk4	1.01815	1.79802	19.0495	0.000186836	0.00978698	44.38	30.12	34.16	56.39	61.97	84.03
	ENSMUSG00000043903.4	Zfp469	-0.518074	4.01408	19.0182	0.000188592	0.00986036	317	302	293	173	204	211
	ENSMUSG00000058725.1	Gm11937	3.90697	-0.982687	20.0283	0.000188512	0.00986036	1.27	0	1.31	3.14	9.44	20.65
	ENSMUSG00000022453.8	Naga	-0.389054	5.99512	19.0073	0.000189211	0.00987409	1242	1203	1052	839	885	730
	ENSMUSG00000026605.14	Cenpf	0.39257	5.65289	19.0085	0.000189143	0.00987409	767	618	715	819	844	879
	ENSMUSG00000031070.15	Mrgprf	-0.561038	3.77763	18.9937	0.000189984	0.00987598	257	264	260	153	157	179
	ENSMUSG00000031095.15	Cul4b	0.479485	4.50671	18.9963	0.000189832	0.00987598	304	303	306	341	394	443
	ENSMUSG00000050912.15	Tmem123	0.366446	7.34182	18.9949	0.000189911	0.00987598	2459	2194	2203	2672	2607	2861
	ENSMUSG00000052137.11	Rbm12b2	0.528825	4.47693	19.0872	0.000190177	0.00987598	262.46	281.49	329.75	355.68	416.78	396.04
	ENSMUSG00000054083.8	Capn12	1.63426	2.08747	28.4331	0.00018956	0.00987598	38.33	30.69	29.04	50.3	94.14	139.33
	ENSMUSG00000094526.1	Gm21451	-5.8354	-1.45619	19.5276	0.000190317	0.00987598	7.38	11.79	3.42	0	0	0
	ENSMUSG00000042121.16	Ssh1	-0.421365	5.2125	18.9834	0.00019057	0.00987988	722	750	579	455	506	447
	ENSMUSG00000067818.6	Myl9	-0.606519	4.37895	20.9406	0.00019116	0.00990119	430	358	417	208	217	307
	ENSMUSG00000031381.16	Piga	0.399325	5.19385	18.9524	0.000192345	0.00995325	556	493	476	549	632	674
	ENSMUSG00000008206.16	Cers4	-0.372361	7.57592	18.9369	0.00019324	0.00998092	3469.23	3457.52	3462.36	2277	2636.26	2506.98
	ENSMUSG00000026977.17	2007-03-01	0.461168	5.98395	21.2736	0.000193145	0.00998092	994	840	749	1006	967	1296
	ENSMUSG00000034282.3	Evpl	0.475415	7.9798	20.9617	0.000194082	0.0100151	3954	3616	2707	3704	4960	4468
	ENSMUSG00000038175.10	Mylip	0.364323	5.89934	18.9147	0.00019453	0.0100202	853	875	792	882	1039	1076
	ENSMUSG00000045349.15	Sh2d5	-1.0198	2.54866	20.9512	0.000194543	0.0100202	145	138	88	61	68	38
	ENSMUSG00000024421.16	Lama3	0.431683	6.39846	20.3127	0.000195213	0.0100424	1136.98	1057.75	1261.89	1274.78	1584.79	1463.81
	ENSMUSG00000042148.8	Cox10	-0.4747	4.36507	18.901	0.000195336	0.0100424	432	391	332	239	262	263
	ENSMUSG00000052040.10	Klf13	-0.41171	7.53724	18.8931	0.000195799	0.0100569	3897	3694	2719	2303	2517	2283
	ENSMUSG00000071793.12	2610005L07Rik	0.443349	5.13453	18.8807	0.000196525	0.0100848	450.75	461.56	516.59	566.38	586.03	649.12
	ENSMUSG00000002265.17	Peg3	-0.571498	4.69069	21.1077	0.000198352	0.0101507	499	475	508	268	269	386
	ENSMUSG00000016255.5	Tubb1	-1.82642	0.307709	18.9437	0.00019846	0.0101507	45	18	20	10	6	5
	ENSMUSG00000028644.17	Ermap	-1.30992	0.844544	18.847	0.000198525	0.0101507	43	39	32	15	11	16
	ENSMUSG00000049288.4	Lix1l	-0.381156	5.43858	18.8468	0.000198541	0.0101507	834.99	818	716	533	537	605
	ENSMUSG00000011427.16	Zfp790	0.603271	3.83253	18.8257	0.0001998	0.0101752	191	151	200	229	242	291
	ENSMUSG00000037336.14	Mfsd2b	-0.907191	2.09596	18.825	0.000199843	0.0101752	102	83	76	34	50	44
	ENSMUSG00000039463.14	Slc9a8	-0.39284	5.57798	18.8234	0.000199939	0.0101752	918	910	791	595	681	560
	ENSMUSG00000042265.13	Trem1	-1.27038	1.745	20.6107	0.000199666	0.0101752	87	88	45	31	34	18
	ENSMUSG00000062944.4	9130023H24Rik	0.560245	3.72055	18.8246	0.000199868	0.0101752	196.9	165.2	151.33	227.6	229.45	237.69
	ENSMUSG00000100220.1	Gm29331	-1.4452	0.905564	18.8018	0.000201244	0.0102323	32.42	55.68	34.02	18.38	9.23	14.23
	ENSMUSG00000041408.18	Wapl	0.354817	6.57683	18.7889	0.000202024	0.0102544	1423	1355	1273	1463	1557	1759
	ENSMUSG00000055932.15	Fto	-0.356012	6.16023	18.7885	0.000202051	0.0102544	1423.99	1258.99	1200.99	823.97	962.99	1010.98
	ENSMUSG00000021281.15	Tnfaip2	-0.439357	7.69426	19.7169	0.000202902	0.0102882	4325.44	3995.05	3253.87	2669.33	2879.37	2274.65
	ENSMUSG00000046474.9	Krtap4-16	4.56457	1.56753	52.3854	0.000204358	0.0103526	5	5	1	35	94	121
	ENSMUSG00000030123.15	Plxnd1	-0.394619	6.67129	18.741	0.000204956	0.0103734	2008	1823	1767	1308	1469	1141
	ENSMUSG00000009566.12	Fpgs	-0.455281	4.78442	18.724	0.00020601	0.0104172	594	505.54	440	332	380	319
	ENSMUSG00000025461.11	Cd163l1	0.787891	2.65033	18.716	0.000206507	0.0104234	86	72	62	130	114	104
	ENSMUSG00000111497.1	Gm38431	-0.884201	2.70125	19.276	0.000206403	0.0104234	128.19	165.78	105.43	59.44	85.89	53.51
	ENSMUSG00000039988.14	Ankrd13c	0.400964	5.85026	18.7128	0.000206708	0.010424	909	855	649	865	974	1090
	ENSMUSG00000003500.13	Impdh1	-0.441827	4.72993	18.6842	0.000208498	0.0105047	527	517	430	306	366	327
	ENSMUSG00000090523.2	Gypc	-0.443468	4.63132	18.678	0.000208888	0.0105148	494	431	449	301	324	306
	ENSMUSG00000030351.5	Tspan11	-0.524206	4.13962	18.6456	0.00021094	0.0106084	317	343	335	195	203	242
	ENSMUSG00000029287.14	Tgfbr3	-0.364209	6.93709	18.6318	0.00021182	0.010619	2400.45	2238.11	2038.43	1399.79	1606.86	1776.55
	ENSMUSG00000039763.10	Dnajc28	1.0413	2.05129	18.9447	0.000211556	0.010619	38	35	54	57	87	100
	ENSMUSG00000042306.11	S100a14	0.402069	8.26647	18.6303	0.000211917	0.010619	4830	4578	3487	4732	5410	5512
	ENSMUSG00000087256.1	Gm15990	-1.976	-0.188399	18.6327	0.000211765	0.010619	23	19	15	6	2	5
	ENSMUSG00000031563.8	Wwc2	-0.40784	5.18455	18.6172	0.000212756	0.0106509	695	624	677	468	456	463
	ENSMUSG00000049128.7	Ivl	1.40948	5.24468	56.4398	0.000212937	0.0106509	337	361	304	576	865	1028
	ENSMUSG00000037003.16	Tns2	-0.378417	6.17361	18.563	0.000216274	0.0108081	1464	1313	1174	776	1029	998
	ENSMUSG00000031520.6	Vegfc	-0.705	2.84065	18.5343	0.000218159	0.0108804	150	142	129	70	87	81
	ENSMUSG00000045664.5	Cdc42ep2	-0.537286	4.08883	18.532	0.000218311	0.0108804	367	333	270	206	225	182
	ENSMUSG00000051790.15	Nlgn2	-0.450454	5.64958	19.957	0.000218261	0.0108804	1002	963	837	488	697	710
	ENSMUSG00000056468.3	5730596B20Rik	1.31252	0.826326	18.5253	0.000218755	0.0108927	12	18.79	15	35.71	37.83	32.29
	ENSMUSG00000050953.10	Gja1	0.644998	8.4204	26.86	0.000221995	0.0110441	4809	4144	4002	4951	5909	7862
	ENSMUSG00000097850.2	Mir205hg	0.62662	3.5845	18.4684	0.00022256	0.0110623	195	131	129	207	232	205
	ENSMUSG00000032454.9	Rbp2	1.03737	2.25075	19.6335	0.000224031	0.0111255	53	59	36	63	91	127
	ENSMUSG00000020674.17	Pxdn	-0.376662	5.8409	18.4309	0.00022511	0.011169	1000	1055	1061	697	725	798
	ENSMUSG00000003033.15	Ap1m1	-0.378768	5.98515	18.4269	0.000225381	0.0111725	1242	1196	1026	795	913	742
	ENSMUSG00000000753.15	Serpinf1	-0.981473	7.36008	42.1583	0.000226187	0.0111924	3431	3369	3704	1300	1574	2070
	ENSMUSG00000104728.1	Gm42462	-1.20168	1.27571	18.4173	0.000226039	0.0111924	62	57	35	22	23	16
	ENSMUSG00000050063.18	Klk6	0.955225	2.01034	18.4041	0.000226949	0.0112201	56	43	31	76	88	67
	ENSMUSG00000025151.16	Maged1	-0.346527	6.47931	18.3997	0.000227248	0.0112249	1666	1617	1541	1059	1181	1263
	ENSMUSG00000041729.15	Coro2b	-0.752413	3.48017	20.0437	0.000228313	0.0112674	216	211	239	93	112	162
	ENSMUSG00000059423.13	Zfp933	0.543718	3.77851	18.3785	0.000228717	0.0112773	199	171	167	226	232	263
	ENSMUSG00000022667.18	Cd200r1	0.762764	3.65935	21.2302	0.00022937	0.0112995	151	182	118	255	259	188
	ENSMUSG00000027953.13	Slc50a1	-0.427881	4.91868	18.3539	0.000230435	0.0113419	640	537	499	363	420	362
	ENSMUSG00000008999.7	Bmp7	0.435867	5.23611	18.3348	0.000231776	0.0113944	637	503	416	578	671	682
	ENSMUSG00000051431.7	Gpr87	1.12199	4.80501	40.2424	0.000231913	0.0113944	346	295	214	430	585	698
	ENSMUSG00000032589.14	Bsn	0.515492	4.0076	18.3255	0.000232439	0.0114101	229	208	200	250	315	275
	ENSMUSG00000101438.2	Gm19412	-1.53274	0.370899	18.2854	0.000235292	0.0115399	36.26	26.19	21.01	9.8	8.38	8.36
	ENSMUSG00000029998.14	Pcyox1	0.371158	7.43773	18.2728	0.000236198	0.0115741	2854	2390	2101	2737	2934	3051
	ENSMUSG00000026594.14	Ralgps2	0.420606	5.26056	18.2663	0.000236665	0.0115868	566	533	485	545	646	767
	ENSMUSG00000001802.16	Lrp3	-0.68147	3.02546	18.2475	0.000238029	0.0116433	153.14	154.74	166.57	82.98	91	100.31
	ENSMUSG00000079597.2	Cstdc4	-2.24641	-0.19213	18.5589	0.000239196	0.01169	34.68	12	11.69	4.69	2	4
	ENSMUSG00000034863.9	Ano8	0.415403	5.29271	18.2266	0.000239545	0.0116968	556	590	477	556	725	718
	ENSMUSG00000055976.6	Cldn23	1.07299	3.24233	25.7761	0.000242088	0.0118105	109	125	60	149	212	208
	ENSMUSG00000078668.3	Gm11595	4.99199	0.313878	35.3653	0.000244191	0.0119027	0	3	0	14	33.65	51.5
	ENSMUSG00000025129.2	Ppp1r27	-0.740403	3.01463	18.1519	0.000245078	0.0119354	169	157	154	80	70	115
	ENSMUSG00000026202.13	Tuba4a	0.40684	7.86774	18.1222	0.000247311	0.0120336	3689.94	3233.66	2827.49	3297.15	4013.88	4603.1
	ENSMUSG00000021116.10	Eif2s1	0.337304	6.3388	18.0992	0.000249057	0.0121079	1245.97	1171	1045	1305.92	1333	1384.95
	ENSMUSG00000046351.11	Zfp322a	0.470409	4.90583	18.2076	0.000250748	0.0121794	401	356	450	493	496	558.96
	ENSMUSG00000027601.13	Mtfr1	0.472097	5.05658	18.737	0.000251793	0.0122195	456	437	450	509	515	699
	ENSMUSG00000054400.16	Cklf	0.551061	4.09407	18.0463	0.000253124	0.0122733	222	214	229	335	299	263
	ENSMUSG00000030257.16	Srgap3	-0.524489	4.28969	18.0426	0.000253417	0.0122768	336	392	376	195	258	259
	ENSMUSG00000035967.15	Ints6l	0.429474	6.46912	19.5957	0.000255845	0.0123728	1276	1255	1121	1212	1539	1798
	ENSMUSG00000047250.13	Ptgs1	0.350073	6.72578	18.0139	0.000255656	0.0123728	1669.71	1506.69	1333.69	1574.52	1858.57	1861.17
	ENSMUSG00000029370.10	Rassf6	0.702434	3.19439	18.0057	0.000256297	0.0123751	135	88	111	149	153	199
	ENSMUSG00000079641.3	Rpl39	0.357215	7.89551	18.0052	0.00025634	0.0123751	3562.61	3428.5	3114.84	3886.78	3885.94	4145.97
	ENSMUSG00000027313.3	Chac1	0.972688	2.19368	18.1491	0.000256572	0.0123755	53	48	45	54	96	116
	ENSMUSG00000032656.14	2003-03-01	0.840055	3.00267	19.4841	0.000257188	0.0123863	123	95	59	132	145	177
	ENSMUSG00000097819.1	Gm26813	-1.08826	1.63757	17.9937	0.000257242	0.0123863	79	75	42	30	30	24
	ENSMUSG00000031871.9	Cdh5	-0.395403	5.92343	18.074	0.000259113	0.0124655	1191	993	1141	795	824	710
	ENSMUSG00000031527.7	Eri1	0.385186	5.28938	17.9653	0.000259494	0.0124731	598	515	525	583	679	712
	ENSMUSG00000015932.8	Dstn	0.388338	8.80826	17.9601	0.000259914	0.0124824	7044	6008	5777	6841	7332	8528
	ENSMUSG00000028128.13	F3	0.817179	6.3525	35.6942	0.00026261	0.012601	1077	1048	750	1260	1543	1861
	ENSMUSG00000072572.9	Slc39a2	0.769123	2.52799	17.9201	0.00026313	0.012615	78	63	62	93	107	119
	ENSMUSG00000024048.15	Myl12a	0.383217	7.99396	17.8971	0.000264992	0.0126901	4172.91	3587.5	2996.26	4121.65	4194.01	4551.96
	ENSMUSG00000054675.5	Tmem119	-0.757756	4.13654	23.2795	0.00026573	0.0126901	365	344	350	149	171	260
	ENSMUSG00000066058.11	Cldn19	-0.748977	2.67272	17.8869	0.000265826	0.0126901	139	118	121	66	80	61
	ENSMUSG00000108621.1	Gm37494	0.451444	4.77948	17.888	0.000265739	0.0126901	378	352	386	449	432	529
	ENSMUSG00000111394.1	Gm49759	-0.416466	6.90679	18.7798	0.000265841	0.0126901	2342.49	2408.67	1895.26	1568.32	1661.26	1341.83
	ENSMUSG00000032265.14	Tent5a	-0.385623	6.60436	17.8752	0.000266789	0.0127244	1915	1901	1524	1301	1322	1127
	ENSMUSG00000025630.8	Hprt	0.356406	6.16236	17.865	0.000267626	0.0127424	1109	1046	888	1228	1188	1160
	ENSMUSG00000090877.3	Hspa1b	0.383572	7.21548	17.8663	0.000267521	0.0127424	2366.3	2184.73	1715.37	2197.66	2717.34	2601.15
	ENSMUSG00000028640.11	Tfap2c	0.379832	6.87889	17.8585	0.000268165	0.0127571	1940	1557	1468	1720	2001	2225
	ENSMUSG00000091474.2	2610021A01Rik	0.632436	3.57193	17.8545	0.000268489	0.0127615	131.41	149	164.87	179.51	215.08	246.03
	ENSMUSG00000029657.15	Hsph1	0.382054	5.93825	17.8495	0.000268903	0.012763	851	859	857	866	1068	1165
	ENSMUSG00000114337.1	Gm48704	1.76552	-0.0266874	17.8486	0.000268981	0.012763	8	8	3	22	16	22
	ENSMUSG00000107008.3	Gm2762	1.14624	1.53463	17.8348	0.000270127	0.0128064	25	37	22	51	44	77
	ENSMUSG00000017765.17	Slc12a4	-0.344917	6.43389	17.8185	0.000271491	0.0128601	1659.6	1656.69	1366.14	1043.91	1187.07	1164.4
	ENSMUSG00000038267.15	Slc22a23	0.483751	5.94143	21.3107	0.000272215	0.0128834	947	856	684	872	1074	1257
	ENSMUSG00000029201.14	Ugdh	-0.353222	6.69391	17.8032	0.000272775	0.0128989	1964	1893	1757	1396	1356	1290
	ENSMUSG00000048387.8	Osr1	-0.734506	2.80208	17.7883	0.000274026	0.012947	156	127	130	60	78	91
	ENSMUSG00000045896.14	Paip2b	0.386262	5.99869	17.7459	0.000277636	0.0131064	951	844	882	921	1048	1266
	ENSMUSG00000038736.10	Nudcd1	0.447197	4.43921	17.7306	0.000278955	0.0131574	315.27	300.5	268.6	371.36	371.26	367.98
	ENSMUSG00000025270.13	Alas2	-1.28237	2.61601	24.9755	0.000281014	0.013236	121.14	130.05	155.87	27.54	63.92	64.3
	ENSMUSG00000074166.7	AW146154	0.62378	3.31377	17.7058	0.000281099	0.013236	131.16	130.07	114.01	161.76	162.9	208.21
	ENSMUSG00000016946.6	Kctd5	0.377809	5.71093	17.6987	0.000281721	0.013254	825	775	609	797	881	961
	ENSMUSG00000029073.9	Cptp	0.401293	4.93863	17.6955	0.000281997	0.0132558	467	428	382	492	507	553
	ENSMUSG00000006356.10	Crip2	-0.419241	7.28574	18.5289	0.000282695	0.0132612	3492	2950	2252	1880	2082	1990
	ENSMUSG00000033382.15	Trappc8	0.345974	6.18733	17.6886	0.000282603	0.0132612	1034	1094	971	1139	1199	1297
	ENSMUSG00000055322.15	Tns1	-0.410702	8.18269	17.729	0.000283067	0.0132612	5578	5374	5087	2984	3834	4351
	ENSMUSG00000110588.1	Gm45774	-0.957096	2.60535	19.3641	0.00028307	0.0132612	164.48	140.27	78.22	65.13	52.1	62.14
	ENSMUSG00000023008.18	Fmnl3	-0.38718	5.3096	17.6695	0.000284276	0.0132952	805	678	687	478	563	487
	ENSMUSG00000040618.7	Pck2	-0.507132	4.12842	17.6699	0.000284237	0.0132952	348	356	283	200	240	199
	ENSMUSG00000059336.14	Slc14a1	-0.82731	2.31929	17.6597	0.000285135	0.0133242	108	102	90	59	49	47
	ENSMUSG00000029859.6	Epha1	0.452168	6.25628	20.2395	0.000285716	0.0133288	1187.07	1085.61	861.48	1057.78	1455.73	1435.59
	ENSMUSG00000096696.1	Zfp960	0.884308	2.5506	17.9866	0.00028548	0.0133288	91.94	47.53	56.62	112.78	94.07	125.89
	ENSMUSG00000070691.10	Runx3	-0.559611	5.02565	21.182	0.00028653	0.0133556	683	649	542	431	418	316
	ENSMUSG00000041112.17	Elmo1	-0.370531	5.72208	17.6318	0.000287614	0.0133948	1020	916	936	696	719	630
	ENSMUSG00000060560.8	Ces4a	-0.399964	5.34189	17.6195	0.000288709	0.0134346	820	747	663	498	588	468
	ENSMUSG00000027677.17	Ttc14	0.369429	6.38541	17.606	0.000289921	0.0134796	1179	1129.66	1207.88	1259.8	1361.25	1583.85
	ENSMUSG00000047945.6	Marcksl1	-0.435024	5.70243	18.893	0.000290739	0.0135063	1104	991	806	676	717	573
	ENSMUSG00000003948.17	Mmd	0.411637	4.84148	17.5936	0.00029104	0.013509	425.81	385.13	375.81	489.58	466.53	496.07
	ENSMUSG00000001819.4	Hoxd13	-0.585427	3.63387	17.5781	0.000292436	0.0135586	285	242	189	145	139	153
	ENSMUSG00000011008.13	Mcoln2	-0.717484	3.56101	19.1091	0.000292598	0.0135586	276	254	175	136	152	104
	ENSMUSG00000005540.10	Fcer2a	-1.22321	1.124	17.5472	0.000295257	0.0136545	46	60	32	20	18	16
	ENSMUSG00000021468.8	Sptlc1	0.341906	6.2441	17.5429	0.000295654	0.0136545	1239	1035	967	1190	1285	1301
	ENSMUSG00000047090.13	Tmem198b	-0.433839	4.60592	17.5475	0.000295225	0.0136545	476.95	432.57	435.52	269.92	323.08	327.01
	ENSMUSG00000108207.2	1810059H22Rik	0.560721	3.72598	17.5444	0.000295511	0.0136545	174.98	152.22	185.43	224.19	238.68	234.53
	ENSMUSG00000024524.17	Gnal	-0.724609	2.81962	17.5193	0.000297825	0.0137319	141.08	135.84	138.98	60.23	81.51	90.99
	ENSMUSG00000062373.8	Tmem65	0.350555	6.86846	17.5195	0.000297805	0.0137319	1756	1677	1537	1794	1874	2175
	ENSMUSG00000022390.11	Zc3h7b	-0.339452	6.49612	17.5114	0.000298559	0.0137543	1792	1631	1460	1071	1271	1212
	ENSMUSG00000048852.13	Gm12185	0.512566	7.03312	22.0545	0.000298829	0.0137553	1789.43	1631.03	1789.08	2056.83	2035.34	2784.21
	ENSMUSG00000037936.15	Scarb1	-0.411171	5.37693	17.4995	0.000299665	0.0137824	828	788	676	555	567	460
	ENSMUSG00000021482.10	Prxl2c	0.398332	5.15486	17.4853	0.000300994	0.013832	503.94	519.51	459.42	517.4	627.54	660.9
	ENSMUSG00000039405.7	Prss23	-0.434528	5.22	17.6365	0.000301698	0.0138529	724.07	629.44	708.82	398.76	458	555.44
	ENSMUSG00000043924.16	Ncmap	-1.00895	1.94694	17.4647	0.000302923	0.0138976	84	68	87	25	33	52
	ENSMUSG00000050108.12	Bpifc	0.953951	6.16809	40.45	0.000303262	0.0139016	882	820	673	1067	1428	1754
	ENSMUSG00000026604.17	Ptpn14	0.360004	7.53549	17.4453	0.00030476	0.0139588	2735	2543.99	2574	2718	3224	3376
	ENSMUSG00000026853.15	Crat	-0.373319	6.65011	17.4402	0.000305243	0.0139693	1832.53	1774.52	1856.6	1101	1353	1454.75
	ENSMUSG00000041362.17	Shtn1	0.339784	6.33201	17.4319	0.000306035	0.013994	1241	1086	1111	1207	1436	1372
	ENSMUSG00000027068.6	Dhrs9	0.627373	3.26401	17.4256	0.000306635	0.0140099	133	122	107	143	174	199
	ENSMUSG00000032496.7	Ltf	-1.85539	4.32737	55.749	0.000308621	0.0140875	561	427	518	171	106	104
	ENSMUSG00000092558.3	Med20	0.352075	5.8251	17.4026	0.000308842	0.0140875	805.61	804.3	792.42	895.26	1017.94	918.3
	ENSMUSG00000025757.12	Hspa4l	0.359139	5.51652	17.3977	0.000309314	0.0140974	704	622	612	725	743	822
	ENSMUSG00000006369.14	Fbln1	-0.403768	5.82377	17.8958	0.00031062	0.0141453	1163	993	964	637	667	870
	ENSMUSG00000087042.1	Gm11611	0.868632	2.24416	17.3726	0.000311736	0.0141845	50.48	49.42	59.3	72.33	85.66	109.66
	ENSMUSG00000033788.15	Dysf	-0.393874	5.08412	17.369	0.000312089	0.0141889	642.99	641.99	571.99	388	479.99	436
	ENSMUSG00000029263.15	Pigg	0.406633	4.77918	17.3525	0.000313702	0.0142506	400	370	368	443	467	481
	ENSMUSG00000011118.4	Panx3	-0.589744	3.54122	17.3402	0.000314908	0.0142819	221	223	223	117	132	161
	ENSMUSG00000023249.15	Parp3	-0.336204	7.02509	17.3413	0.000314803	0.0142819	2463	2341	2223	1654	1766	1709
	ENSMUSG00000026005.15	Rpe	0.42646	4.66942	17.3321	0.000315701	0.0143062	359.41	337.44	348.74	431.65	425.61	437.38
	ENSMUSG00000034226.7	Rhov	0.48823	4.68318	17.5974	0.000316261	0.0143199	410	364	263	381	479	476
	ENSMUSG00000046733.7	Gprc5a	-0.790044	2.67847	17.3168	0.00031722	0.014347	131	151	102	66	82	56
	ENSMUSG00000049721.14	Gal3st1	0.557935	3.85034	17.3152	0.000317377	0.014347	218	193	152	210	263	290
	ENSMUSG00000024137.9	E4f1	-0.381126	5.57733	17.3017	0.000318717	0.0143958	920	951	741	566	681	599
	ENSMUSG00000031539.6	Ap3m2	-0.461101	5.30273	18.6029	0.000322937	0.0145745	750	855	604	514	501	458
	ENSMUSG00000002900.16	Lamb1	-0.326092	6.34993	17.2422	0.000324701	0.0146422	1565	1451	1371	1020	1120	1084
	ENSMUSG00000002825.8	Qtrt1	-0.591883	4.04229	18.0284	0.000325909	0.0146847	327	388	238	196	196	188
	ENSMUSG00000020696.18	Rffl	0.394895	5.2035	17.2116	0.000327829	0.0147592	603.79	485.83	452.29	568.17	619.04	677.21
	ENSMUSG00000021806.4	Nid2	-0.497709	4.10162	17.1914	0.000329911	0.0148333	348.53	312.17	304.13	207.72	187.67	232.59
	ENSMUSG00000038545.13	Cul7	-0.393571	5.36544	17.1904	0.000330009	0.0148333	782	808	670	447	595	546
	ENSMUSG00000025083.18	Afap1l2	0.369735	5.83222	17.1746	0.000331649	0.0148468	843	839	722	793	1027	1049
	ENSMUSG00000027869.14	Hsd3b6	-0.599433	4.42165	19.6735	0.000331135	0.0148468	417.97	376	442.97	189	271	298
	ENSMUSG00000034919.2	Ttc22	0.538467	4.11456	17.1746	0.000331647	0.0148468	262	247	174	260	303	349
	ENSMUSG00000036745.15	Ttll7	0.616931	4.61054	20.977	0.000331154	0.0148468	346	298	287	366	385	567
	ENSMUSG00000055301.8	Adh7	0.332023	6.06122	17.18	0.000331087	0.0148468	1029	935	895	1054	1092	1169
	ENSMUSG00000015880.13	Ncapg	0.457919	4.53045	17.1679	0.000332342	0.0148658	328.57	290.89	316.97	419.45	382.36	384.25
	ENSMUSG00000022799.4	Arhgap31	-0.326454	6.2783	17.1652	0.000332625	0.0148665	1470	1408	1296	972	1065	1030
	ENSMUSG00000060548.13	Tnfrsf19	0.340451	7.01038	17.1532	0.000333882	0.0149106	2055	1748	1709	1978	2187	2262
	ENSMUSG00000044337.5	Ackr3	-0.354886	6.7962	17.1299	0.000336328	0.0150077	2260	2096	1696	1442	1469	1430
	ENSMUSG00000038415.10	Foxq1	0.606352	3.40099	17.1185	0.000337534	0.0150374	149	133	120	151	212	202
	ENSMUSG00000050666.14	Vstm4	-0.896174	1.9268	17.1202	0.000337358	0.0150374	83	73	74	30	40	44
	ENSMUSG00000019055.15	Plod1	-0.384479	6.04855	17.2328	0.000337961	0.0150443	1258	1232	1130	876	940	735
	ENSMUSG00000014905.4	Dnajb9	0.493016	4.38159	17.1004	0.000339457	0.0150976	303	240	290	357.98	327	396
	ENSMUSG00000047423.10	AI837181	-0.404528	5.00472	17.0981	0.000339702	0.0150976	610	617	536	404	443	379
	ENSMUSG00000107191.1	Gm43579	-1.03026	2.15536	18.1562	0.000340703	0.0151299	101.3	102.17	76.53	35.85	61.77	28.07
	ENSMUSG00000064308.10	2410137M14Rik	-5.56233	-1.63512	17.5301	0.000341253	0.0151422	6	5	7	0	0	0
	ENSMUSG00000029866.13	Kel	-3.9897	-1.37284	17.0809	0.00034155	0.0151432	7	9	7	0	1	0
	ENSMUSG00000020044.13	Timp3	-0.380128	8.36857	17.0688	0.000342851	0.0151832	6438.79	5667.22	5967.41	3772.6	4203.84	4855.68
	ENSMUSG00000033111.16	3830406C13Rik	0.372792	5.2385	17.0674	0.000343	0.0151832	555.96	515.77	514.92	632.74	624.74	634.51
	ENSMUSG00000036676.14	Tmtc3	0.452495	4.81019	17.058	0.000344014	0.0151965	406	363.9	371.91	415.97	446.97	580.89
	ENSMUSG00000068747.14	Sort1	0.418277	6.43147	18.5454	0.000344122	0.0151965	1261	1177	1134	1204	1435	1776
	ENSMUSG00000086695.1	Gm15247	1.71481	0.00483339	17.0584	0.000343969	0.0151965	7	10	3	22	19.25	20
	ENSMUSG00000057614.6	Gnai1	0.392603	5.6648	17.0453	0.000345392	0.0152404	816	636	671	751	826	992
	ENSMUSG00000043333.12	Rhbdl2	0.624194	3.28831	17.0425	0.000345694	0.0152416	129	121	118	153	161	210
	ENSMUSG00000111792.1	Gm33858	-2.59604	-0.844524	17.0192	0.000348236	0.0153415	17	8	10	2	2	1
	ENSMUSG00000026415.11	Fcamr	1.20467	0.917221	17.0102	0.000349228	0.0153729	21	14	17	31	36	44
	ENSMUSG00000028911.16	Srsf4	-0.348284	6.40487	16.98	0.000352563	0.0155074	1743.64	1512.66	1344.34	979.53	1215.99	1130.13
	ENSMUSG00000017485.11	Top2b	0.38652	7.23843	16.9816	0.000352843	0.0155075	2188.37	2045.39	2090.36	2093.77	2593.62	2967.48
	ENSMUSG00000026483.13	Fam129a	-0.361759	6.62101	16.9657	0.00035415	0.0155526	1768	1695	1869	1165	1284	1393
	ENSMUSG00000039849.6	Pcif1	-0.337549	6.18163	16.9605	0.00035473	0.0155657	1428.23	1355.52	1139.93	941.02	957.84	954.4
	ENSMUSG00000044393.15	Dsg2	0.490882	4.31674	16.9566	0.000355175	0.0155729	290.81	248.77	258	306.68	315.84	411.92
	ENSMUSG00000031898.9	Dpep3	-1.19177	1.24701	16.9536	0.000355509	0.0155752	47	66	37	24.51	18	17
	ENSMUSG00000050530.14	Fam171a1	-0.453401	4.36752	16.9439	0.00035659	0.0156103	379	380	385	241	256	275
	ENSMUSG00000021510.11	Zfp729a	0.535806	3.96532	16.9383	0.000357222	0.0156256	220.21	173.04	218.76	280.62	270.48	266.8
	ENSMUSG00000041935.10	AW549877	0.358162	6.19193	16.9124	0.000360161	0.0157326	1135	992	973	1194	1103.02	1360
	ENSMUSG00000042793.13	Lgr6	0.419455	5.37424	17.2271	0.000360235	0.0157326	610	529	573	562	774	784
	ENSMUSG00000031016.9	Wee1	-0.423356	4.57524	16.9077	0.000360696	0.0157403	450	463	401	285	310	308
	ENSMUSG00000029598.12	Plbd2	-0.351858	6.26659	16.8955	0.000362086	0.0157885	1529.99	1466	1186.99	999	1057.99	952
	ENSMUSG00000022744.12	Cldnd1	0.335197	5.93618	16.8905	0.000362654	0.0158008	946	899	776	931	1041	1073
	ENSMUSG00000024238.15	Zeb1	-0.329439	6.04184	16.8823	0.000363592	0.0158293	1245	1185	1114	832	853	914
	ENSMUSG00000017831.8	Rab5a	0.44441	6.5758	19.2839	0.000367318	0.0159789	1397.99	1409	1109.97	1436.97	1508	1965.99
	ENSMUSG00000027274.16	Mkks	0.53369	3.81824	16.8452	0.000367879	0.0159908	219.1	163.01	173.39	217.85	262.2	259.85
	ENSMUSG00000033327.18	Tnxb	-0.538523	8.09279	21.6374	0.000368886	0.016022	5418.78	5364.34	4861.28	2534.58	3404.61	4036.84
	ENSMUSG00000002489.16	Tiam1	0.352061	7.66658	16.8311	0.000369529	0.0160373	3160	2862	2628	2975	3506	3699
	ENSMUSG00000024136.14	Dnase1l2	1.24833	4.56992	39.4278	0.000371328	0.0160776	258	249	175	365	486	644
	ENSMUSG00000031209.14	Heph	0.59862	4.23851	18.6963	0.000370935	0.0160776	269	195	258	277	333	402
	ENSMUSG00000095432.9	Zfp748	0.573367	3.43021	16.8165	0.000371233	0.0160776	142	139	134	193	181	194.98
	ENSMUSG00000005947.11	Itgae	0.79504	2.25988	16.7964	0.000373601	0.0161634	61	56	49	89	94	82
	ENSMUSG00000029727.7	Cyp3a13	0.733365	2.89237	16.7925	0.000374072	0.0161712	88	97	81	114	118	177
	ENSMUSG00000020160.18	Meis1	0.461667	4.5956	16.7767	0.000375941	0.0162393	353.63	320.99	306.09	327.9	451.28	469.62
	ENSMUSG00000025075.14	Habp2	-1.18911	1.14398	16.7688	0.000376887	0.0162675	48.37	56.3	35.02	12.65	24.99	17.94
	ENSMUSG00000058239.13	Usf2	-0.361001	6.22909	16.7662	0.000377192	0.016268	1505	1464	1121	906	1064	956
	ENSMUSG00000041445.9	Mmrn2	-0.412712	5.2215	16.7562	0.000378397	0.0163073	770	622	664	498	498	423
	ENSMUSG00000024678.6	Ms4a4d	-0.395035	5.30715	16.7439	0.000379867	0.0163579	800	786	591	489	487	544
	ENSMUSG00000092595.2	Gm20427	-0.650028	3.02138	16.7284	0.00038174	0.0164258	168.01	170.04	134.2	80.43	93.89	102.83
	ENSMUSG00000024948.15	Map4k2	-0.344245	5.99727	16.7162	0.000383222	0.0164706	1220	1164	1069	789	929	788
	ENSMUSG00000034312.15	Iqsec1	-0.326488	6.16428	16.715	0.000383376	0.0164706	1351	1309.62	1195	890	1003.34	941
	ENSMUSG00000062278.2	Gm11562	6.52809	2.3868	69.7226	0.00038384	0.0164778	3.26	2	0	73.3	159.95	229.4
	ENSMUSG00000037416.13	Dmxl1	0.414959	5.10899	16.6868	0.000386815	0.0165805	490	437	497	588	534	630
	ENSMUSG00000116560.1	Gm2808	3.74776	-0.725465	20.1741	0.000386831	0.0165805	2.98	0	0	22.29	13.4	5.77
	ENSMUSG00000031754.10	Nudt21	0.343878	5.60136	16.682	0.000387405	0.0165923	737.8	674	654.54	774.76	788.01	854.29
	ENSMUSG00000004105.8	Angptl2	-0.363147	7.22308	16.6747	0.000388306	0.016618	2629	2678	2793	1724	2067	2044
	ENSMUSG00000015143.15	Actn1	-0.334308	6.68763	16.6716	0.00038869	0.0166216	2028.65	1847.84	1689	1321.93	1438	1300
	ENSMUSG00000002210.11	Smg9	-0.412739	5.18498	16.6676	0.000389178	0.0166296	710	729	568	477	491	416
	ENSMUSG00000053012.17	Krcc1	0.325851	6.24643	16.65	0.000391368	0.0166755	1172	1034	1051	1203	1279	1280
	ENSMUSG00000057541.14	Pus7	0.366909	5.45827	16.6493	0.000391454	0.0166755	656	603	595	633	760	816
	ENSMUSG00000078889.11	Gm14288	0.977751	1.71134	16.6563	0.000390581	0.0166755	31	40.09	31.73	53.32	55.58	78.51
	ENSMUSG00000107000.1	Gm43481	0.995546	1.50059	16.654	0.000390872	0.0166755	31	32	25	49	51	62
	ENSMUSG00000008976.16	Gabpa	0.344052	5.67659	16.6302	0.000393831	0.0167638	796.71	676.95	703.89	813	855.43	879.34
	ENSMUSG00000031150.13	Ccdc120	0.499929	5.46647	19.9098	0.000396409	0.0168597	697	619	463	639	792	882
	ENSMUSG00000031673.6	Cdh11	-0.462875	5.30298	18.2082	0.000396691	0.0168597	744.01	682.79	772.56	433	453	592.12
	ENSMUSG00000032363.15	Adamts7	-0.591572	3.60246	16.6039	0.000397141	0.0168659	276.1	252.1	174.03	130.06	154	143.14
	ENSMUSG00000000093.6	Tbx2	-0.831145	2.87808	17.7758	0.000399893	0.0169443	138	142	164	55	72	105
	ENSMUSG00000068566.12	Myadm	-0.341671	7.58424	16.584	0.000399672	0.0169443	3668	3624	3097	2470	2542	2529
	ENSMUSG00000092203.7	1110038B12Rik	0.473429	4.3056	16.5821	0.000399905	0.0169443	296	231	270	312	371	338
	ENSMUSG00000025268.15	Maged2	-0.414323	4.77874	16.5671	0.000401817	0.0170123	530	502	478	307	343	396
	ENSMUSG00000026586.16	Prrx1	-0.357321	6.97673	16.5625	0.000402418	0.0170247	2425	2224	2190	1454	1580	1896
	ENSMUSG00000022665.15	Ccdc80	-0.577555	7.81076	22.9999	0.000403811	0.0170706	4228	4643	4113	2170	2564	3330
	ENSMUSG00000000983.13	Wfdc18	1.41432	3.98457	37.8572	0.000405453	0.017127	177	162	81	296	381	348
	ENSMUSG00000073889.10	Il11ra1	-0.337067	5.87202	16.5135	0.000408743	0.0172528	1085.77	1049.22	1018.82	695.47	771.26	840.13
	ENSMUSG00000028860.13	Sytl1	0.375394	5.9052	16.5042	0.000409959	0.017291	991	857	686	871	1066	1084
	ENSMUSG00000035372.2	1810055G02Rik	-0.430749	4.46925	16.4974	0.000410852	0.0173155	441	388	394	266	297	273
	ENSMUSG00000032053.8	Pou2af1	-1.02813	1.47862	16.491	0.00041169	0.0173376	68	59	45	29	24	24
	ENSMUSG00000061167.9	Rpl15-ps3	0.385166	5.75135	16.5765	0.000412465	0.017357	881.82	652.03	727.25	912.89	954.11	846.33
	ENSMUSG00000032867.8	Fbxw8	-0.352198	6.15877	16.4802	0.000413114	0.0173712	1432.37	1326.79	1121.51	906.18	1025.28	861.92
	ENSMUSG00000025993.10	Slc40a1	1.37856	4.62576	43.1265	0.000413859	0.0173796	252	224	188	380	503	713
	ENSMUSG00000026556.15	Vangl2	0.381208	5.75444	16.4739	0.000413943	0.0173796	758	736	766	746	956	1026
	ENSMUSG00000074733.14	Zfp950	0.470105	4.99045	17.4341	0.000414808	0.0174028	444	372	466	492	518	634
	ENSMUSG00000096917.2	2500002B13Rik	0.806477	2.19375	16.4529	0.000416731	0.0174702	54	47	56	78	86	90
	ENSMUSG00000029581.14	Fscn1	-0.622846	5.26941	23.2278	0.000418792	0.0175301	826	781	653	444	543	361
	ENSMUSG00000067276.5	Capn6	-0.840322	2.29744	16.439	0.000418583	0.0175301	98	86	111	55	42	55
	ENSMUSG00000053687.15	Dpep2	-0.459889	5.72692	18.9951	0.000419222	0.0175349	1029.7	1022.23	909.35	748.89	652.95	572.62
	ENSMUSG00000015093.15	Clic3	0.750265	4.56822	24.0052	0.000419676	0.0175406	348	307	204	359	452	516
	ENSMUSG00000004270.13	Lpcat3	-0.326021	6.35843	16.4207	0.000421035	0.0175842	1610.02	1443.4	1363.08	1054.24	1141.08	1046.27
	ENSMUSG00000005107.13	Slc2a9	-0.597798	3.54332	16.4061	0.000423008	0.0176533	248	244	181	152	131	124
	ENSMUSG00000001865.2	Cpa3	0.699934	4.99632	24.4928	0.000424621	0.0177072	347	355	463	536	576	647
	ENSMUSG00000029213.11	Commd8	0.34293	5.63132	16.3861	0.000425721	0.0177398	769	690	654	818	850	797
	ENSMUSG00000019461.12	Plscr3	-0.358981	6.01452	16.3775	0.000426904	0.0177676	1395.9	1142.91	987	754.44	887.89	883.46
	ENSMUSG00000038980.1	Rbbp8nl	0.941283	1.97418	16.3719	0.000427672	0.0177676	37	39	50	64	64	97
	ENSMUSG00000042918.17	Mamstr	-0.715626	3.11649	16.5599	0.000427655	0.0177676	154	145	210	87	96	105
	ENSMUSG00000054690.17	Emcn	-0.508872	4.21782	16.372	0.000427653	0.0177676	399	303	348	224	257	198
	ENSMUSG00000033542.13	Arhgef5	0.362986	7.36712	16.3525	0.000430335	0.0178649	2488	2432	2077	2314	2920	3073
	ENSMUSG00000028175.15	Depdc1a	0.649343	3.10367	16.3415	0.000431849	0.0179143	125.2	103.87	92.48	143.95	136.08	183.18
	ENSMUSG00000001661.5	Hoxc6	0.750777	2.64482	16.3377	0.00043238	0.0179229	71	68	82	97	138	110
	ENSMUSG00000059890.16	Ube4a	0.325175	6.25728	16.3183	0.000435073	0.0180211	1109	1139	1032	1168	1290	1335.13
	ENSMUSG00000028186.14	Uox	1.88738	-0.143781	16.311	0.000436089	0.0180362	4	7	5	9	18	29
	ENSMUSG00000050357.9	Carmil2	-0.706616	2.94125	16.3121	0.000435936	0.0180362	164.57	161.06	126.89	100.47	84.18	69.73
	ENSMUSG00000057729.12	Prtn3	-1.33157	1.23066	17.2757	0.000436704	0.0180482	66	52	35	28	15	12
	ENSMUSG00000028369.15	Svep1	-0.378186	5.54232	16.2763	0.000440968	0.0181904	858	901	782	538	567	700
	ENSMUSG00000035799.6	Twist1	-0.558715	3.73657	16.2752	0.000441131	0.0181904	311	228	224	157	142	176
	ENSMUSG00000113136.1	Gm19951	-0.823521	3.26788	19.058	0.000440612	0.0181904	214	241	134	113	105	86
	ENSMUSG00000034902.17	Pip5k1c	-0.359138	7.02206	16.271	0.000441719	0.0182011	2593	2489	2002	1669	1830	1571
	ENSMUSG00000040728.15	Esrp1	0.376081	7.95896	16.2583	0.000443524	0.0182619	3993	3521	3004	3543	4324	4703
	ENSMUSG00000038879.8	Nipal2	0.463154	5.62127	18.7515	0.000444411	0.0182848	717	773	517	775	829	939
	ENSMUSG00000033952.14	Aspm	0.421933	4.99848	16.2318	0.000447315	0.0183907	418	415	479	540	534	552
	ENSMUSG00000006269.7	Atp6v1b1	-1.10073	2.99794	22.7917	0.000449029	0.0184475	167	232	119	64	94	64
	ENSMUSG00000025817.12	Nudt5	0.344319	5.59264	16.2072	0.000450875	0.0185096	772.14	643.67	641.02	738.77	832.85	833.42
	ENSMUSG00000046743.6	Fat4	-0.526271	3.97708	16.1736	0.000455774	0.0186969	268.12	303.68	315.24	169.6	186.93	214
	ENSMUSG00000023084.11	Lrrc71	-1.31883	0.679903	16.1512	0.00045907	0.0187977	39.65	36.4	25.12	9.45	16.56	10.54
	ENSMUSG00000030711.16	Sult1a1	-0.687787	3.1244	16.1542	0.000458626	0.0187977	168.92	176	166	70	98	126
	ENSMUSG00000040229.11	Gpr34	0.958776	1.73522	16.15	0.00045925	0.0187977	40	32	34	62	49	79
	ENSMUSG00000069919.7	Hba-a1	-1.63075	6.12718	63.0057	0.000462784	0.0189284	1703.65	1528.46	1848.2	364.05	530.96	631.42
	ENSMUSG00000025326.12	Ube3a	0.406505	5.52974	16.626	0.000463859	0.0189584	688.78	562.55	664.31	720.8	724.98	900.06
	ENSMUSG00000042508.16	Dmtf1	0.330842	5.86111	16.1127	0.000464798	0.0189827	836.82	856.11	791.78	914.3	947	1022.56
	ENSMUSG00000031258.4	Xkrx	1.14697	5.18267	39.8391	0.000469836	0.0191744	387	421	287	566	742	931
	ENSMUSG00000019861.15	Gopc	0.339524	5.74754	16.0527	0.000473893	0.0193257	829	730	733	827	867	980
	ENSMUSG00000021189.11	Atxn3	0.377366	5.45451	16.0229	0.000478464	0.0194978	638	597	605	666	686	856
	ENSMUSG00000030946.13	Lhpp	-0.426447	4.51407	16.0166	0.000479451	0.0195093	455	430	377	260	321	284
	ENSMUSG00000060621.6	Nkpd1	1.01966	3.68591	25.1859	0.000479158	0.0195093	158	159	94	198	239	330
	ENSMUSG00000027162.7	Lin7c	0.350364	6.15814	16.0034	0.000481494	0.0195781	1110	1036	895	1041	1162	1370
	ENSMUSG00000000266.11	Mid2	0.574176	5.17387	20.8806	0.00048302	0.0196257	534	416	452	540	585	802
	ENSMUSG00000018322.10	Tomm34	-0.337585	5.58749	15.9797	0.000485202	0.0196999	931	879	784	608	662	619
	ENSMUSG00000024063.13	Lbh	-0.368405	6.50739	16.0663	0.000487998	0.0197753	1715	1693	1546	1286	1188	1051
	ENSMUSG00000029780.14	Nt5c3	0.564919	6.14356	22.9184	0.000487455	0.0197753	1066	1007	700	1134	1189	1441
	ENSMUSG00000038600.12	Atp6v0a4	0.431236	4.71301	15.9611	0.000488129	0.0197753	396.07	384.33	300	387.7	446	507.23
	ENSMUSG00000037896.17	Rcor1	0.326046	6.71238	15.9576	0.000488686	0.0197834	1564	1451	1480	1593	1761	1850
	ENSMUSG00000116802.1	Gm5165	0.666012	2.77198	15.9379	0.000491806	0.0198952	91	87	73.89	119.62	117	131
	ENSMUSG00000067616.11	Klk11	0.7176	5.80222	27.9024	0.000495518	0.0200307	739	731	575	791	1052	1263
	ENSMUSG00000109876.1	Gm45449	3.40455	-1.32688	15.8912	0.000499313	0.0201694	0	1.32	1.28	7.54	4.84	10.11
	ENSMUSG00000015944.9	Castor2	-0.354977	5.34196	15.8805	0.000501052	0.0202249	789	754	656	477	574	533
	ENSMUSG00000020137.5	Thap2	0.900714	4.52358	27.338	0.000502489	0.0202534	268	195	307	385	443	506
	ENSMUSG00000035735.10	Dagla	-0.562345	3.36306	15.8732	0.000502239	0.0202534	210	201	175	119	119	127
	ENSMUSG00000040940.18	Arhgef1	-0.368333	7.87601	15.8586	0.000504626	0.0203248	4807	4412	3634	2933	3392	2816
	ENSMUSG00000042268.10	Slc26a9	0.602042	3.25746	15.8497	0.000506078	0.0203684	136	115	113	142	169	199
	ENSMUSG00000028730.14	Cfap57	1.71305	0.334491	16.6232	0.000507384	0.0203914	12	12	2	20	25	34
	ENSMUSG00000038502.17	Ptov1	-0.341343	5.7206	15.8427	0.000507238	0.0203914	1088	926	840	627	740	705
	ENSMUSG00000015354.8	Pcolce2	-0.434003	4.80012	15.8235	0.000510401	0.0204089	510	491	536	300	346	408
	ENSMUSG00000025915.14	Sgk3	0.363609	5.69048	15.8295	0.000509405	0.0204089	783	719	681	936	812	831
	ENSMUSG00000030469.10	Zfp719	0.711502	2.95171	15.8341	0.000508656	0.0204089	92	80	107	136	118	169
	ENSMUSG00000031232.17	Magt1	0.3212	6.07171	15.8356	0.000508397	0.0204089	1035.81	940	915	1086	1081	1159
	ENSMUSG00000034037.14	Fgd5	-0.427462	4.54723	15.8247	0.000510215	0.0204089	449	419	421	250	314	322
	ENSMUSG00000048856.9	Slc25a47	-0.881257	1.85936	15.828	0.000509659	0.0204089	69	78	71	38	32	39
	ENSMUSG00000049076.12	Acap2	0.332485	6.93084	15.8256	0.000510054	0.0204089	1889.46	1758.85	1582.78	1911.66	1926.77	2224.98
	ENSMUSG00000111915.1	Gm3285	4.34808	-0.231494	24.9194	0.000510766	0.0204089	1	1	1	5	17.51	40.78
	ENSMUSG00000009907.17	Vps4b	0.326001	6.86327	15.814	0.000511987	0.020443	1829.83	1720.91	1457.95	1826.96	1934.97	2011.91
	ENSMUSG00000026356.15	Dars	0.345686	5.83933	15.8039	0.000513666	0.0204823	918	774	749	958	880	1012
	ENSMUSG00000070334.4	Krtap31-1	4.84035	-0.267455	25.7288	0.000513711	0.0204823	2	0	0	11.22	10.78	40.63
	ENSMUSG00000031825.16	Crispld2	-0.359813	5.73675	15.8014	0.000514088	0.0204826	980	908	998	635	669	776
	ENSMUSG00000032177.17	Pde4a	-0.484721	3.93877	15.7942	0.000515286	0.0205008	283	293	280	174	203	188
	ENSMUSG00000037706.17	Cd81	-0.329496	6.51595	15.7953	0.000515107	0.0205008	1704	1618	1599	1162	1139	1311
	ENSMUSG00000051375.15	Pcdh1	0.519073	5.58936	20.193	0.000515938	0.0205102	728	707	487	714	865	953
	ENSMUSG00000078486.3	Perm1	0.485623	6.6924	19.8716	0.000516263	0.0205102	1526	1526	1131	1445	1904	2050
	ENSMUSG00000022090.10	Pdlim2	0.360864	5.67238	15.7766	0.000518253	0.0205727	783	776	604	743	924	891
	ENSMUSG00000074252.2	Gm10654	-2.40449	-0.319912	17.014	0.000518577	0.0205727	24	24	6	3	5	1
	ENSMUSG00000029404.15	Arl6ip4	-0.388804	5.03828	15.765	0.000520206	0.0206226	648	606	544	370	482	414
	ENSMUSG00000037972.7	Snn	0.353364	5.24809	15.7181	0.000528216	0.0209102	603	523	488	599	650	648
	ENSMUSG00000117698.1	BC037704	1.03768	1.21469	15.7182	0.000528199	0.0209102	26	21	23	38	47	48
	ENSMUSG00000030796.17	Tead2	-0.711961	2.55758	15.7053	0.000530415	0.0209823	123	114	108	60	60	74
	ENSMUSG00000027465.13	Tbc1d20	-0.337999	7.09584	15.697	0.000531853	0.0210241	2698	2512	2191	1763	1931	1687
	ENSMUSG00000051285.17	Pcmtd1	0.370212	6.39164	16.001	0.000533296	0.0210662	1308	1059	1174	1326	1280	1614
	ENSMUSG00000114011.1	Gm47955	6.00619	-1.40879	18.6319	0.000533689	0.0210666	0	0	0	1	11	11
	ENSMUSG00000031878.18	Nae1	0.391204	5.09536	15.6755	0.0005356	0.021127	574	456	404	527	592	608
	ENSMUSG00000004319.15	Clcn3	0.393629	5.86126	16.503	0.00053671	0.0211504	894.01	817	722	857	903.01	1186
	ENSMUSG00000112950.1	Gm32369	0.639812	2.91628	15.6678	0.000536956	0.0211504	106	89	87	121	152	132
	ENSMUSG00000097217.2	Gm26549	1.16524	0.990725	15.656	0.000539022	0.0212167	24	12	20	38	37	41
	ENSMUSG00000028857.16	Tmem222	-0.378156	5.12324	15.6427	0.000541364	0.0212938	703	653	548	450	470	425
	ENSMUSG00000009681.10	Bcr	-0.327691	5.69939	15.6372	0.000542345	0.021317	1021	889	884	642	699	710
	ENSMUSG00000018500.2	Adora2b	0.639874	3.32178	15.6328	0.000543109	0.021317	135	128	112	202	195	139
	ENSMUSG00000071192.6	Wfikkn1	-1.05627	1.86703	16.413	0.000542862	0.021317	92	95	43	29	31	41
	ENSMUSG00000071660.10	Ttc9c	0.326067	5.80536	15.6244	0.000544611	0.0213609	857	762	778	897	912	960
	ENSMUSG00000029528.19	Pxn	-0.359662	7.41933	15.6194	0.000545498	0.0213805	3537	3096	2704	2179	2468	2032
	ENSMUSG00000061740.8	Cyp2d22	-0.637941	3.21521	15.6134	0.000546568	0.0214073	183	183	172	80	107	133
	ENSMUSG00000029674.13	Limk1	-0.437453	4.30541	15.5972	0.000549466	0.0215056	386	381	327	231	270	243
	ENSMUSG00000043940.15	Wdfy3	0.3145	6.79482	15.5841	0.000551826	0.0215828	1686.15	1600.59	1499.94	1716.83	1859.27	1912.01
	ENSMUSG00000029228.15	Lnx1	0.908248	3.60704	21.8595	0.000553029	0.0215917	163.69	141.25	104.49	180.03	208.96	317.81
	ENSMUSG00000039395.8	Mreg	0.364076	5.69756	15.5764	0.000553223	0.0215917	827	738	634	728	898	982
	ENSMUSG00000096380.1	Gm19668	6.43269	-1.11088	22.1376	0.000552524	0.0215917	0	0	0	3	7	20.5
	ENSMUSG00000020472.14	Zkscan17	-0.367958	5.18624	15.5721	0.000554	0.0216068	737.6	662.37	582.77	414	508.23	492.95
	ENSMUSG00000006378.15	Gcat	0.391085	5.1905	15.5632	0.000555624	0.0216317	566.3	539	425	521	651.67	674.91
	ENSMUSG00000030061.16	Uba3	0.321095	5.80024	15.5645	0.000555388	0.0216317	832	805	756	890	951	914
	ENSMUSG00000031949.17	Adat1	0.581382	3.36091	15.5621	0.000555809	0.0216317	125	131	137	155	196	194
	ENSMUSG00000024526.9	Cidea	-0.479345	4.13744	15.559	0.000556374	0.0216385	338	310	334	210	244	196
	ENSMUSG00000030800.10	Prss8	1.12889	4.22136	30.9236	0.0005581	0.0216904	218	228	122	314	379	447.59
	ENSMUSG00000044456.16	Rin3	-0.425101	5.38543	16.5092	0.000563028	0.0218666	809	795	708	548	595	440
	ENSMUSG00000086161.1	Gm15389	3.06547	-1.18023	15.5145	0.000564541	0.02191	1	1	1	3	10	13
	ENSMUSG00000019996.17	Map7	0.358933	5.78655	15.5014	0.000566974	0.0219531	890.64	786.69	666.94	787.2	939.89	1042.17
	ENSMUSG00000023048.13	Prr13	-0.360421	6.53403	15.5278	0.000566924	0.0219531	1955	1680	1422	1236	1278	1094
	ENSMUSG00000042474.6	Fcmr	-1.22415	0.81771	15.502	0.000566867	0.0219531	42	42	26	13	18	12
	ENSMUSG00000061259.11	Tmprss11d	1.12069	1.67996	16.4142	0.000567236	0.0219531	39	38	18	52	51	87
	ENSMUSG00000020653.12	Klf11	-0.449969	4.42443	15.4728	0.000572329	0.0221347	441	429	326	242	262	301
	ENSMUSG00000025431.4	Crisp1	5.66038	-1.63152	16.1752	0.000574373	0.0221983	0	0	0	1	7	10
	ENSMUSG00000051341.6	Zfp52	0.478565	4.09907	15.4401	0.000578502	0.0223423	242	232	215	309	260	314
	ENSMUSG00000027510.17	Rbm38	-0.465691	4.14017	15.4379	0.000578912	0.0223426	353	296.88	330.93	194	237.85	224
	ENSMUSG00000033446.7	Lpar6	0.406705	4.61334	15.4241	0.000581549	0.0224287	367	311.26	336.48	399.76	418	420.74
	ENSMUSG00000032911.6	Cspg4	-0.326136	6.32557	15.3802	0.000589985	0.0227224	1562	1487	1271	923	1114	1139
	ENSMUSG00000039041.15	Adrm1	-0.341739	6.55664	15.382	0.000589651	0.0227224	1889.48	1794.88	1420.25	1131.49	1356.83	1213.87
	ENSMUSG00000026725.17	Tnn	-0.507817	4.01379	15.3758	0.000590851	0.0227399	339	272	299	164	192	235
	ENSMUSG00000032172.8	Olfm2	0.901177	1.7464	15.3687	0.000592238	0.0227768	46	35	29	56	61	72
	ENSMUSG00000063383.5	Zfp947	1.08721	1.35118	15.3667	0.000592629	0.0227768	33.12	22	21	58.06	34.9	55.17
	ENSMUSG00000020846.6	Rflnb	-0.438501	4.60577	15.3586	0.000594206	0.0228058	494	407	447	258	306	355
	ENSMUSG00000091971.3	Hspa1a	0.388275	5.78637	16.0108	0.00059409	0.0228058	922.59	799.56	601.38	840.19	971.39	978.59
	ENSMUSG00000003352.14	Cacnb3	-0.365568	5.25538	15.3526	0.000595381	0.022835	751	719	608	493	527	462
	ENSMUSG00000003812.13	Dnase2a	0.331776	6.13864	15.3405	0.000597754	0.0229102	1049.63	1103.03	866.71	1094.21	1234.36	1170.96
	ENSMUSG00000021687.14	Scamp1	0.397985	6.08149	16.539	0.000601439	0.0230355	1119	946	774	991	1124	1323
	ENSMUSG00000028626.5	Col9a2	-1.38312	0.443394	15.3139	0.000603013	0.023048	25	32	28	6	12	12
	ENSMUSG00000078870.9	Gm14410	0.811635	2.10664	15.316	0.000602598	0.023048	47.93	43.37	55.88	74.7	80.95	82.9
	ENSMUSG00000108905.1	Gm44618	1.6367	0.245901	15.4416	0.000602641	0.023048	6.22	11.68	7.17	13	22.05	37.61
	ENSMUSG00000024191.15	Bnip1	-0.415039	4.54338	15.3048	0.000604817	0.023101	468	450	367	266	308	313
	ENSMUSG00000003031.14	Cdkn1b	0.329135	5.97062	15.2862	0.000608551	0.0232276	958	835	891	990	1004	1116
	ENSMUSG00000054702.14	Ap1s3	0.530809	3.6395	15.2634	0.000613137	0.0233866	173.73	175	140.95	184.91	222	246
	ENSMUSG00000037007.17	Zfp113	0.520442	3.88527	15.2492	0.000616007	0.0234799	196	184	202	237	230	305
	ENSMUSG00000042684.8	Npl	0.591362	3.37528	15.2413	0.000617616	0.023525	170	122	107	174	196	181
	ENSMUSG00000030598.15	Fbxo17	-0.7206	2.41803	15.2382	0.000618265	0.0235336	109	106	98	54	62	59
	ENSMUSG00000042215.8	Bag2	0.612724	3.44724	15.2171	0.000622577	0.0236814	147.96	145	121	152	181.93	250.68
	ENSMUSG00000047045.17	Tmem164	-0.33997	7.48574	15.1962	0.000626887	0.023829	3561	3314	2835	2284	2553	2212
	ENSMUSG00000005611.15	Mrvi1	-0.779362	2.541	15.1819	0.00062986	0.0239256	112	119	115	41	70	76
	ENSMUSG00000034958.11	Atcay	-1.17267	1.34838	15.4363	0.000630935	0.02395	49	47	64	11	26	29
	ENSMUSG00000021591.8	Glrx	0.399395	7.19818	16.228	0.000632503	0.0239767	2247	2247	1656	2609	2543	2276
	ENSMUSG00000064127.13	Med14	0.362594	5.45988	15.1701	0.000632333	0.0239767	681	557	621	655	734	818
	ENSMUSG00000067336.6	Bmpr2	0.35463	6.15969	15.1618	0.000634062	0.0240194	1107	936	990	1090	1097	1391
	ENSMUSG00000037103.8	Dcaf15	-0.455025	5.38532	17.1466	0.000636604	0.0240914	868	819	652	543	581	440
	ENSMUSG00000053646.13	Plxnb1	0.336972	7.49661	15.1487	0.000636832	0.0240914	2830.97	2495.91	2402.89	2580.99	3239.89	3188.89
	ENSMUSG00000025862.14	Stag2	0.336638	6.30607	15.1273	0.000641361	0.0242462	1213	1070	1097	1251	1205	1479
	ENSMUSG00000027357.16	Crls1	0.516017	3.74301	15.1145	0.000644068	0.0243165	184	176	169	247	207	242
	ENSMUSG00000087194.9	Skint6	0.800342	2.36575	15.1144	0.0006441	0.0243165	72	62	45	77	89	121
	ENSMUSG00000048458.8	Inka2	0.418236	4.72867	15.0981	0.000647581	0.0244313	418	333	345	380	508	463
	ENSMUSG00000068074.3	Gm10228	3.95141	3.13831	61.9495	0.000648667	0.0244556	14.42	15.76	20.5	156.52	189.72	392.85
	ENSMUSG00000058709.11	Egln2	-0.42404	5.85188	17.0505	0.000651058	0.0245291	1185	1175	849	695	829	671
	ENSMUSG00000033032.15	Afap1l1	-0.490757	4.2565	15.0761	0.000652319	0.0245599	387.91	343	341.7	199.91	210	295
	ENSMUSG00000096421.1	Gm10100	6.23504	-1.25222	20	0.000658087	0.0247602	0	0	0	2	7	18
	ENSMUSG00000021203.15	Otub2	0.836521	4.48882	24.3477	0.000658799	0.0247702	272	298	209	326	410	549
	ENSMUSG00000028458.12	Tesk1	-0.389765	5.08708	15.0394	0.000660317	0.0247937	693.32	660.93	510.92	415.68	479.02	411.89
	ENSMUSG00000030929.17	Eri2	0.517141	3.63693	15.0408	0.000660007	0.0247937	167.27	152.04	171.16	203.72	222.09	222.15
	ENSMUSG00000041779.5	Tram2	-0.345359	5.39797	15.0369	0.00066087	0.0247976	762	810	703	529	538	584
	ENSMUSG00000103672.1	Gm37621	1.20432	0.664865	15.0313	0.000662098	0.0248269	14.54	14.56	12.52	24	34	34
	ENSMUSG00000004568.13	Arhgef18	0.30979	6.08571	15.0258	0.000663315	0.0248557	1048	974	911	1032	1188	1131
	ENSMUSG00000091694.9	Apol11b	-2.02967	-0.588432	15.0173	0.000665174	0.0249085	12	14	15	4	2	3
	ENSMUSG00000029238.11	Clock	0.322526	6.345	15.0038	0.000668166	0.0249531	1251	1133	1109	1189	1335	1508
	ENSMUSG00000069584.4	Gm10272	6.00599	-1.40881	18.1661	0.000667624	0.0249531	0	0	0	1	9	13
	ENSMUSG00000106933.1	Gm43621	0.841541	1.98277	15.0056	0.000667775	0.0249531	47.29	39.31	47.31	57.48	80.43	83.83
	ENSMUSG00000107760.1	Gm44401	1.15721	0.918683	15.0062	0.000667643	0.0249531	13	22	18	31	41	38
	ENSMUSG00000042377.8	Fam83g	0.512274	7.23938	19.7035	0.00067194	0.0250772	2413.91	2146	1508.97	2298.9	2818.97	2819.91
	ENSMUSG00000058260.2	Serpina9	1.08735	3.40329	23.5541	0.000673077	0.025089	125	133	69	169	198	272
	ENSMUSG00000089736.2	Tgfbr3l	-0.577479	3.3088	14.9814	0.000673164	0.025089	203.32	165.42	197	117.07	112.12	120.33
	ENSMUSG00000014778.10	Fhod1	-0.433038	5.57892	16.7437	0.000673633	0.0250897	919.77	957	775.77	628.68	668.37	508
	ENSMUSG00000098021.2	Gm9522	1.57117	0.712769	16.5407	0.000674484	0.0251045	10	17	10	15	46	42
	ENSMUSG00000041440.18	Gk5	-0.34665	5.42063	14.9672	0.000676366	0.0251576	806	727	777	526	602	549
	ENSMUSG00000079083.3	Jrkl	0.473575	4.11787	14.9595	0.000678097	0.0252051	241	216	241	287	272	336
	ENSMUSG00000033170.14	Card10	-0.347477	6.22347	14.9415	0.000682168	0.025308	1602	1352	1110	908	1066	956
	ENSMUSG00000050296.14	Abca12	1.20244	6.32331	44.3281	0.000681803	0.025308	871	825	658	1308	1530	2161
	ENSMUSG00000109771.1	Gm35315	0.985083	1.51299	14.9412	0.000682235	0.025308	29	30	30	52	42.16	69
	ENSMUSG00000034157.12	Cipc	0.313306	6.31822	14.9357	0.000683492	0.0253377	1264	1141	1041	1183	1333	1429
	ENSMUSG00000031197.11	Vbp1	0.413656	4.82819	14.9192	0.000687247	0.0254598	447	366	364	467	426	549
	ENSMUSG00000031586.17	Rbpms	-0.476969	3.86741	14.9164	0.000687885	0.0254665	290	285	240	168	193	178
	ENSMUSG00000018537.16	Pcgf2	-0.387548	4.81162	14.9031	0.000690958	0.0255631	557	495	482	311	395	376
	ENSMUSG00000086390.7	1810019D21Rik	0.540255	3.50734	14.8996	0.000691764	0.0255759	168.06	140.08	137.08	167.16	221.09	209.16
	ENSMUSG00000001020.8	S100a4	-0.366939	8.42364	14.8951	0.00069279	0.0255968	6362	6710	5647	4622	4708	4015
	ENSMUSG00000033287.16	Kctd17	-0.346257	5.52877	14.888	0.000694432	0.0256403	941	830	730	558	670	581
	ENSMUSG00000025025.14	Mxi1	0.359941	5.83321	14.9127	0.000695389	0.0256581	848.18	808.75	756.21	785.52	948.56	1127.59
	ENSMUSG00000078190.7	Dnm3os	-0.705754	2.57669	14.8819	0.000695839	0.0256581	127	130.08	93	63	62	72
	ENSMUSG00000031990.15	Jam3	-0.603463	3.04577	14.8788	0.000696567	0.0256679	158.8	163.16	150.5	92.83	87.72	106.12
	ENSMUSG00000022540.16	Rogdi	-0.451168	4.13875	14.8514	0.000702957	0.0258517	322	354	300	214	230	213.8
	ENSMUSG00000024451.9	Arap3	-0.418381	4.93172	14.852	0.000702829	0.0258517	589	568	525	408	425	324
	ENSMUSG00000076867.2	Trdv4	1.30528	0.487656	14.853	0.000702593	0.0258517	17	10	9	28	29	25
	ENSMUSG00000028631.7	Kcnq4	-0.583288	3.25348	14.843	0.000704933	0.0259072	176	191	177	92	122	122
	ENSMUSG00000003810.12	Mast2	-0.326277	6.79551	14.8392	0.000705836	0.0259073	2102	1958	1913	1264	1618	1520
	ENSMUSG00000032185.15	Carm1	-0.31443	6.18245	14.8378	0.000706169	0.0259073	1383.11	1240.5	1264.26	869.51	1034.67	980.83
	ENSMUSG00000055415.8	Atp10b	0.612153	4.46558	18.3665	0.000706339	0.0259073	303	285	255	298	382	512
	ENSMUSG00000002222.14	Rmnd5a	0.439872	7.06309	17.3231	0.000711409	0.0260588	1907	1802	1776	1887	2173	2827
	ENSMUSG00000035459.18	Stab2	-0.697406	2.75156	14.8174	0.000710997	0.0260588	146.87	109	138	71	65	88
	ENSMUSG00000027663.12	Zmat3	0.385428	5.89354	15.6826	0.000712455	0.0260799	939	809	749	810	1016	1184
	ENSMUSG00000036620.14	Mgat4b	-0.358498	5.07617	14.8011	0.000714863	0.0261479	651	576	599	420	457	436
	ENSMUSG00000049922.8	Slc35c1	-0.351857	5.4315	14.7975	0.000715728	0.0261479	846	770	721	533	634	519
	ENSMUSG00000101970.7	1810026B05Rik	0.416733	4.82128	14.7978	0.000715659	0.0261479	406.67	363.77	395.09	425.51	446.42	567.02
	ENSMUSG00000111521.1	Gm48529	-0.552617	3.5801	14.7921	0.000717019	0.0261778	279.26	212.38	191.62	117.84	156.18	154.42
	ENSMUSG00000032905.5	Atg12	0.359638	5.39693	14.7842	0.000718931	0.0262303	631	533	615	689	679	738
	ENSMUSG00000055044.12	Pdlim1	-0.319111	6.55038	14.7769	0.000720678	0.0262768	1884.91	1714.14	1445.67	1167.72	1319.17	1229.28
	ENSMUSG00000037730.13	Mynn	0.399855	4.69711	14.7743	0.000721298	0.0262821	356	345	374	403	457	452
	ENSMUSG00000020085.15	Aifm2	-0.44916	4.62469	14.8068	0.000722241	0.0262992	529.29	486.93	361.33	307.49	341	276
	ENSMUSG00000044641.7	Pard6b	0.761625	2.52676	14.7676	0.000722934	0.0263071	73	64	66	76	106	137
	ENSMUSG00000043461.13	Sptssb	4.43996	-0.582232	21.0029	0.000725066	0.0263674	1	0	1	3	15	30
	ENSMUSG00000089804.2	Gm16136	0.403992	4.90223	14.7473	0.000727866	0.0264518	495	416	337	444	540	533
	ENSMUSG00000033991.9	Ttc37	0.359627	5.44288	14.7356	0.000730711	0.0265378	635	620	584	607	744	831
	ENSMUSG00000031157.10	Pqbp1	-0.378633	4.72851	14.7263	0.000732981	0.0266028	502	495	446	320	357	346
	ENSMUSG00000006389.13	Mpl	-2.29735	-0.687754	14.7098	0.000737057	0.0267333	18	11	10	1	1	5
	ENSMUSG00000061778.10	Mospd2	0.416749	4.9206	14.7027	0.000738799	0.0267614	389	438	420	512	455	571
	ENSMUSG00000068794.7	Col28a1	-0.56524	3.30435	14.7041	0.000738473	0.0267614	196	168	197	112	118	120
	ENSMUSG00000107379.1	Gm43126	-0.873677	2.4684	15.5249	0.000741091	0.0268269	150.48	99.65	88.54	35.76	66.06	68.39
	ENSMUSG00000036181.2	Hist1h1c	-0.486393	5.49927	17.9811	0.000742644	0.0268656	941.87	829.87	778.83	439.82	546.88	694.87
	ENSMUSG00000024059.10	Clip4	0.337567	7.11481	14.6708	0.000746747	0.0269964	2181	2056	1703	1998	2351	2565
	ENSMUSG00000042500.11	Ago4	0.310268	5.78539	14.6382	0.000754962	0.0272756	836	794	749	847	921	952
	ENSMUSG00000011632.7	Pinlyp	1.52663	3.86319	35.262	0.000756904	0.0273279	142	134	87	211	337	418
	ENSMUSG00000022800.14	Fyttd1	0.339682	5.88197	14.6219	0.000759114	0.0273899	891	835	790	881	916	1141
	ENSMUSG00000042099.16	Kank3	-0.402806	4.48207	14.6188	0.000759909	0.0274007	413	409	399.87	271	297	285
	ENSMUSG00000073879.4	Gm5859	-2.86619	-1.18402	14.6095	0.000762282	0.0274684	5.94	8.6	10.52	1	1.15	1
	ENSMUSG00000061273.3	Mmgt1	0.357869	5.40757	14.6031	0.000763934	0.0274922	642	570	584	634	673	818
	ENSMUSG00000105476.1	Gm35439	1.39375	0.396326	14.6041	0.000763659	0.0274922	10	15	7	24	20	34
	ENSMUSG00000048442.15	Smim5	0.557433	3.31964	14.5867	0.000768139	0.0276256	150	125	113	181	170	173
	ENSMUSG00000117628.1	Gm50012	-0.843877	2.08158	14.5808	0.000769674	0.0276628	96	101	58	42	48	40
	ENSMUSG00000038347.15	Tcte2	1.55826	0.332994	14.7713	0.000771419	0.0277076	13	8	7	11	31	35
	ENSMUSG00000030772.6	Dkk3	-0.340538	5.38307	14.5674	0.000773153	0.0277519	762	744	740	511	532	595
	ENSMUSG00000018830.10	Myh11	-0.468243	5.40346	17.1266	0.000775335	0.0278122	722	747	886	469	529	583
	ENSMUSG00000024661.7	Fth1	-0.372373	10.1712	14.555	0.000776384	0.0278318	23464.2	21414.7	18276.9	15449.2	15655.1	13626.9
	ENSMUSG00000034135.15	Sik3	-0.308559	6.44076	14.5344	0.00078178	0.0280071	1674	1564	1413	1068	1256	1135
	ENSMUSG00000015702.13	Anxa9	1.22637	4.76245	35.5372	0.00078322	0.0280225	285	310	193	421	581	698.98
	ENSMUSG00000030413.7	Pglyrp1	-0.762067	2.51278	14.5303	0.000782869	0.0280225	124	116	99	72	66	45
	ENSMUSG00000062397.8	Zfp706	0.340813	7.39059	14.5116	0.000787816	0.0281687	2669.88	2370.53	2139.07	2397.81	2800.03	3183.89
	ENSMUSG00000072812.4	Ahnak2	0.332342	8.1657	14.502	0.000790375	0.028242	4573	4203	3562	4393	5083	4810
	ENSMUSG00000023882.15	Zfp54	0.604626	2.96763	14.498	0.000791444	0.028262	104	92.92	98.93	122	142	152
	ENSMUSG00000029720.9	Gm20605	-0.339656	6.74292	14.4714	0.000798575	0.028471	2201.56	1940.04	1663.18	1343.87	1573.22	1294.6
	ENSMUSG00000035840.7	Lysmd3	0.479837	3.91369	14.4704	0.000798839	0.028471	201	225	179	258	245	274
	ENSMUSG00000079003.2	Samd1	-0.348373	5.07566	14.4722	0.000798339	0.028471	643	606	572	404	452	463
	ENSMUSG00000023150.14	Ivns1abp	0.336167	8.00929	14.4624	0.000800983	0.0285291	3875.77	3565.8	3571.87	3805.79	4232.85	4805.72
	ENSMUSG00000110277.2	Gm45871	0.600409	3.07585	14.4583	0.0008021	0.0285505	126	95	100	155	139.84	152
	ENSMUSG00000035399.12	Oser1	0.406027	5.55603	15.5274	0.000802675	0.0285527	762.26	670.5	530.8	711.44	744.55	935.14
	ENSMUSG00000018340.13	Anxa6	-0.325076	7.45816	14.4431	0.000806222	0.0286605	3263	3385	2818	2274	2418	2262
	ENSMUSG00000016534.15	Lamp2	0.357282	8.28747	14.4335	0.000808844	0.0287168	4897	4512	3882	5588	4835	5180
	ENSMUSG00000020186.7	Csrp2	-0.597797	3.441	14.4352	0.000808395	0.0287168	197	205	220	140	137	102
	ENSMUSG00000029360.3	Gm9754	-1.52031	0.30765	14.4052	0.000816625	0.0289745	37.63	25.21	16.49	3.82	11.72	9.08
	ENSMUSG00000005220.10	Corin	2.10123	0.00284034	16.477	0.000823932	0.0291632	7	3	6	8	20	37
	ENSMUSG00000014177.10	Tvp23b	0.402623	4.58647	14.3746	0.0008251	0.0291632	355	302	339	400	401	413
	ENSMUSG00000038418.7	Egr1	-0.459008	6.51257	17.8593	0.000824551	0.0291632	2087	1627	1424	1056	1037	1335
	ENSMUSG00000038943.16	Prc1	0.322935	6.29305	14.3764	0.000824619	0.0291632	1134.4	1072.28	1152.57	1307.78	1290.14	1279.34
	ENSMUSG00000049723.14	Mmp12	1.02527	1.48885	14.3795	0.000823735	0.0291632	25	41	20	43	58	61
	ENSMUSG00000059113.2	Gm10061	3.27701	-1.40839	14.3754	0.000824886	0.0291632	1	1	0	5	8	8
	ENSMUSG00000097451.11	Rian	-0.66256	4.43194	19.0169	0.000826381	0.0291898	399	383	482	223	215	303
	ENSMUSG00000006390.15	Elovl1	0.33324	6.89086	14.3525	0.000831316	0.0293455	1887	1785	1425	1755	2170	1982
	ENSMUSG00000048643.5	Krtap19-9a	5.58373	-1.68017	15.1055	0.000835505	0.0294745	0	0	0	2	12	3
	ENSMUSG00000085156.8	Snhg15	-0.421267	4.52666	14.3034	0.00084524	0.029799	494	433	348	255.17	312	308
	ENSMUSG00000000530.16	Acvrl1	-0.519966	5.75589	19.2332	0.000846113	0.0298108	1065	1103	908	697	736	537
	ENSMUSG00000074793.10	Hspa12b	-0.460677	3.87144	14.2873	0.000849884	0.0299247	287	280	246	172	182	190
	ENSMUSG00000041096.13	Tspyl2	-0.350789	5.41899	14.2728	0.00085407	0.030053	805	825	686	475	617	584
	ENSMUSG00000021420.13	Fars2	-0.498244	3.83594	14.2541	0.000859512	0.03015	278.74	272	250	191.39	177	153
	ENSMUSG00000027088.10	Phospho2	0.410809	4.31622	14.2484	0.000861179	0.03015	286	273.69	263.43	320	331.01	358
	ENSMUSG00000031467.10	Agpat5	0.428155	5.00917	14.8504	0.000858889	0.03015	469	438	418	454	514	679.83
	ENSMUSG00000034573.14	Ptpn13	0.363066	7.46961	14.4086	0.000859902	0.03015	2487	2418	2573	2434	3172	3317
	ENSMUSG00000040711.8	Sh3pxd2b	-0.327968	7.54693	14.2508	0.000860455	0.03015	3698	3486	2912	2407	2627	2354
	ENSMUSG00000049580.12	Tsku	-0.481213	3.91206	14.2491	0.000860975	0.03015	317	301	226	175	198	182
	ENSMUSG00000057977.10	Skint11	0.980553	1.55834	14.2515	0.000860249	0.03015	42	32	19	56	49	63
	ENSMUSG00000083563.1	Gm13340	0.693189	2.5529	14.2515	0.000860258	0.03015	77.16	64.65	70.69	97.34	95.72	125.15
	ENSMUSG00000022114.5	Spry2	-0.408928	4.42746	14.2374	0.000864386	0.0302431	450	396	338	262	282	275
	ENSMUSG00000045502.6	Hcar2	0.375451	5.84604	14.9439	0.00086792	0.0303476	921	884	627	962	987	941
	ENSMUSG00000023993.7	Treml1	-2.01376	-0.591965	14.2189	0.00086985	0.0303779	20	13	8	3	3	3
	ENSMUSG00000052921.13	Arhgef15	-0.478638	4.05599	14.2188	0.000869883	0.0303779	307	289	330	219	195	199
	ENSMUSG00000027665.13	Pik3ca	0.328486	6.16316	14.2044	0.000874142	0.0305074	1091	952	1025	1081	1136	1341
	ENSMUSG00000028634.17	Hivep3	-0.366744	5.08523	14.1984	0.000875922	0.0305119	670	640	537	407	494	417
	ENSMUSG00000044857.8	Lemd2	-0.349859	5.99	14.2672	0.000874982	0.0305119	1299	1210	945	825	902	758
	ENSMUSG00000059325.14	Hopx	0.449316	5.66883	16.8231	0.000875744	0.0305119	714.5	722.59	640.44	697.5	854.02	1073.48
	ENSMUSG00000040774.15	Cept1	0.394958	6.58118	15.6854	0.000876558	0.0305149	1597.52	1314.03	1108.63	1746.28	1526.99	1559.41
	ENSMUSG00000114055.1	Gm32089	1.21794	0.891331	14.1926	0.000877666	0.0305343	22	21	8	35	30	44
	ENSMUSG00000007777.9	0610009B22Rik	0.523821	3.45522	14.1784	0.000881896	0.0306622	146	149	136	176	184	212
	ENSMUSG00000063273.11	Naa15	0.324648	6.77591	14.1735	0.000883369	0.0306942	1775	1556	1388	1635	1761	2043
	ENSMUSG00000026879.14	Gsn	-0.384695	10.7869	14.1704	0.000884308	0.0307075	35840	32536	28709	18721	23229	26668
	ENSMUSG00000026193.15	Fn1	-0.37642	10.7339	14.1651	0.000885912	0.0307396	31767	28990	32113	18747	24125	23427
	ENSMUSG00000032667.17	Pon2	0.363619	6.55841	14.7327	0.00088745	0.0307396	1524.85	1324.13	1151.17	1335.7	1539.15	1865.33
	ENSMUSG00000046707.9	Csnk2a2	0.338397	6.86364	14.1602	0.000887394	0.0307396	1742	1665	1567	1652	1890	2270
	ENSMUSG00000079297.4	Gm2223	0.36492	4.87708	14.1611	0.000887096	0.0307396	417.16	414.83	404.94	473.83	482.74	512.7
	ENSMUSG00000019464.6	Ptger1	-0.519787	3.77125	14.1421	0.000892859	0.0308498	300.75	271.6	200.83	172.18	171.47	150.78
	ENSMUSG00000021277.16	Traf3	-0.329254	6.23464	14.1439	0.000892332	0.0308498	1474	1430	1158	997	1056	915
	ENSMUSG00000024855.10	Pacs1	-0.344526	5.39593	14.1427	0.0008927	0.0308498	828	780	669	558	579	510
	ENSMUSG00000046691.14	Chtf8	0.395736	6.09737	15.643	0.000891218	0.0308498	1181.65	930.65	764.46	1180.73	1154.02	1124.68
	ENSMUSG00000023980.7	Taf8	-0.339374	5.19697	14.1384	0.000893998	0.0308512	714	661	603	444	517	479
	ENSMUSG00000082101.3	Slfn14	-5.29756	-1.78746	14.4557	0.000894011	0.0308512	6	5	4	0	0	0
	ENSMUSG00000074406.5	Zfp628	-0.518648	4.25082	14.9618	0.000895979	0.0308999	432	388	264	213	263	217
	ENSMUSG00000096638.2	Ighv2-9	3.40844	-1.32584	14.1243	0.000898309	0.0309609	0	0	2	11	7	5
	ENSMUSG00000043323.17	Fbrsl1	-0.307085	5.83551	14.1166	0.000900665	0.0310228	1116	972.95	962.99	716.93	798	757
	ENSMUSG00000053310.11	Nrgn	-1.42855	0.287953	14.1143	0.000901373	0.031028	23	26	27	4	11	11
	ENSMUSG00000024182.16	Axin1	-0.333298	6.27709	14.1118	0.000902119	0.0310343	1558	1487	1149	986	1102	967
	ENSMUSG00000038412.8	Higd1a	0.339279	5.94861	14.0998	0.000905841	0.0311431	938.48	872.4	826.03	851.21	1039.32	1192.05
	ENSMUSG00000086231.1	Rapgef4os3	1.12743	0.99878	14.0911	0.000908534	0.0312163	19	13	25	31	41	44
	ENSMUSG00000054555.11	Adam12	-0.389732	4.71726	14.0832	0.000910971	0.0312806	535.78	433	467.87	340	330	339
	ENSMUSG00000004843.7	Chmp2b	0.328575	5.96626	14.0666	0.000916155	0.0314392	982	857	842	924	989	1192
	ENSMUSG00000029387.10	Gtf2h3	0.385697	4.70428	14.0584	0.000918714	0.0315075	378	343	367	389	456	469
	ENSMUSG00000042367.12	Gjb3	0.370722	6.21713	14.8811	0.000922721	0.0316253	1217	1118	819	1097	1315	1333
	ENSMUSG00000093826.1	Gm6900	-2.58955	-1.08323	14.0352	0.000926019	0.0317187	10.21	6.71	11.26	1.18	2.16	1.07
	ENSMUSG00000016984.7	Etaa1	0.506481	3.71651	14.0311	0.000927334	0.0317442	213	167	144	231	223	228
	ENSMUSG00000110324.1	Gm40460	6.06821	-1.36789	17.924	0.000931058	0.031852	0	0	0	2	5	17
	ENSMUSG00000018849.6	Wwc1	0.473327	4.6409	14.9097	0.000932332	0.0318759	396	328	287	334	446	514
	ENSMUSG00000027405.16	Nop56	-0.319336	7.16767	14.0119	0.000933419	0.0318933	2877.8	2515.09	2342.25	1698.59	2108.96	1902.21
	ENSMUSG00000024862.16	Klc2	-0.438941	4.35515	14.0041	0.000935916	0.031959	428.42	373.1	333.59	206.44	281.57	284.1
	ENSMUSG00000045968.7	Teddm2	-1.09081	0.930831	13.9876	0.000941227	0.0321205	38.12	40.05	38.08	18.04	19.06	13.03
	ENSMUSG00000047881.14	Rell1	0.299795	6.17343	13.973	0.000945937	0.0322614	1150	1026	955.98	1099	1259.98	1190.99
	ENSMUSG00000027184.14	Caprin1	0.320397	7.93891	13.9668	0.000947934	0.0323096	3836	3525	3214	4103	3943	4088
	ENSMUSG00000061718.12	Ppp1r1b	-1.08623	0.983458	13.9514	0.000952939	0.0324602	46	46	29	19	17	16
	ENSMUSG00000024065.8	Ehd3	-0.415628	4.42068	13.9485	0.000953904	0.0324732	423	395	360	274	294	244
	ENSMUSG00000038025.8	Phf2	-0.301472	6.32705	13.9465	0.000954559	0.0324755	1568	1403	1318	965	1158	1084
	ENSMUSG00000002835.9	Chaf1a	-0.374717	5.13656	13.9429	0.00095573	0.0324828	625.93	681.74	603.56	429.13	517.44	415.11
	ENSMUSG00000020105.9	Lrig3	0.327984	5.41928	13.9422	0.000955945	0.0324828	659	613	562	630	718	775
	ENSMUSG00000004791.7	Pgf	-1.00475	1.69226	14.1326	0.000958187	0.0324992	73	85	42	32	37	22
	ENSMUSG00000033863.2	Klf9	-0.462565	5.88923	17.3684	0.000957866	0.0324992	1207	1099	1015	672	633	916
	ENSMUSG00000038024.17	Dennd4c	0.313118	5.90193	13.9359	0.000958025	0.0324992	905.86	863.51	806.74	960.98	920.3	1068.4
	ENSMUSG00000029484.12	Anxa3	-0.344591	5.13979	13.9231	0.000962239	0.0326167	679	654	571	413	470	499
	ENSMUSG00000024146.9	Cript	0.360496	4.97444	13.9144	0.000965112	0.0326941	476	444	409	535	493	541
	ENSMUSG00000001419.17	Mef2d	-0.32074	7.56489	13.9058	0.000967953	0.0327703	3619.77	3586.45	2984.48	2227.97	2619.89	2670.98
	ENSMUSG00000022037.15	Clu	-0.313758	7.41293	13.8924	0.000972417	0.0328855	3403	2997	2755	2076	2250	2454
	ENSMUSG00000039841.14	Zfp800	0.390138	4.51087	13.892	0.000972542	0.0328855	321.97	328	299.9	370	374.94	403
	ENSMUSG00000059316.2	Slc27a4	-0.30756	6.97392	13.8855	0.000974737	0.0329396	2388	2332	2012	1500	1746	1768
	ENSMUSG00000059995.12	Atxn7l3	-0.334016	6.83454	13.88	0.000976577	0.0329816	2282	2204	1691	1442	1625	1431
	ENSMUSG00000002028.13	Kmt2a	0.321505	7.01797	13.8647	0.000981708	0.0330944	1802	1858	1894	1953	2204	2268
	ENSMUSG00000021866.15	Anxa11	-0.325475	6.48263	13.8677	0.000980695	0.0330944	1776.75	1710.89	1335.69	1199.63	1176.44	1153.77
	ENSMUSG00000022658.10	Tagln3	2.07858	0.136819	16.5371	0.00098134	0.0330944	6	5	7	9	20	43
	ENSMUSG00000027198.16	Ext2	-0.313975	5.84962	13.8549	0.00098503	0.0331862	1187	1015	895	742	779	766
	ENSMUSG00000037960.11	Card19	-0.367419	4.83198	13.8511	0.000986289	0.0332085	566	518	464	365	387	351
	ENSMUSG00000034889.8	Cactin	-0.338946	5.50497	13.8419	0.000989426	0.0332939	931	827	698	570	648	565
	ENSMUSG00000039578.17	Ccser1	0.919185	1.63731	13.8396	0.000990219	0.0333003	28	37	35	43	66	67
	ENSMUSG00000025979.13	Mob4	0.342043	5.56541	13.8257	0.000994936	0.0334387	734	642	642	799	704	850
	ENSMUSG00000032244.9	Fem1b	0.320477	5.90775	13.8207	0.000996675	0.0334768	929	802	848	867	1013	1095
	ENSMUSG00000020490.16	Btnl10	-3.80097	-1.49708	13.8161	0.000998233	0.0335088	5	6	9	0	0	1
	ENSMUSG00000024580.8	Grpel2	0.350058	5.52699	13.8062	0.00100165	0.0336033	692	664	603	622	831	855
	ENSMUSG00000022174.8	Dad1	-0.304678	5.68855	13.7995	0.00100394	0.0336597	984	911	858	639	707	708
	ENSMUSG00000020092.9	Pald1	-0.425041	4.35828	13.7946	0.00100564	0.0336962	436	340	356	223	283	271
	ENSMUSG00000057933.10	Gsta2	0.598843	2.87847	13.7905	0.00100706	0.0337233	96.91	96.71	84.95	114.75	138.77	136.37
	ENSMUSG00000049892.7	Rasd1	-1.00517	1.28905	13.7872	0.00100822	0.0337418	59	54	36	18	28	22
	ENSMUSG00000032281.11	Acsbg1	0.332806	7.68088	13.7834	0.00100951	0.0337648	3070	3165	2565	2955	3734	3534
	ENSMUSG00000026095.15	Asnsd1	0.32267	5.82665	13.7692	0.00101447	0.03391	847.58	803.32	784	889	866.48	1054.1
	ENSMUSG00000022124.15	Fbxl3	0.300071	6.4815	13.7633	0.00101653	0.0339176	1367	1242	1261	1374	1449	1573
	ENSMUSG00000030747.5	Dgat2	0.64706	6.67145	23.0539	0.00101596	0.0339176	1505	1391	971	1505	2006	2055
	ENSMUSG00000090210.7	Itga10	-0.518418	4.44551	15.2326	0.00101574	0.0339176	448.78	368.55	415.29	200.76	268.24	327.59
	ENSMUSG00000040339.10	Fam102b	-0.308795	6.17755	13.7545	0.00101962	0.0340001	1295	1357	1214	905	928	1047
	ENSMUSG00000085580.1	1700061F12Rik	2.71316	-1.14428	13.7466	0.00102241	0.0340727	2	2	0	10	7	9
	ENSMUSG00000034379.9	Wdr5b	0.53995	3.39275	13.7391	0.00102503	0.0341396	131	138	140	186	194.33	169
	ENSMUSG00000030263.13	Lrmp	-0.403811	4.92257	13.7304	0.00102813	0.0342221	601	577	489	398	433	326
	ENSMUSG00000054939.6	Zfp174	0.772829	2.32634	13.7261	0.00102967	0.0342528	65	43	67	78	92	107
	ENSMUSG00000024726.10	Carnmt1	0.438888	4.6686	13.9754	0.00103261	0.03433	381.35	302.41	357.23	392.94	392.07	516.98
	ENSMUSG00000003623.4	Crot	0.381991	5.08318	13.7118	0.00103475	0.0343683	510	446	464.26	502	529	678
	ENSMUSG00000068523.12	Gng5	0.334962	5.69068	13.7111	0.001035	0.0343683	798.82	700.94	706.93	873.92	768.88	917.87
	ENSMUSG00000021981.10	Cab39l	0.345607	5.60085	13.6991	0.00103927	0.0344896	759	633	673	756	740	923
	ENSMUSG00000048949.8	Gm6206	0.405646	4.52978	13.6848	0.00104441	0.0346393	365.29	312.14	283	374.35	357.74	437.14
	ENSMUSG00000036678.8	Aaas	-0.396361	4.69066	13.6809	0.00104585	0.0346662	554	456	408	315	365	309
	ENSMUSG00000024193.8	Phf1	-0.353457	5.11829	13.6721	0.001049	0.03475	672.67	627.66	579.39	399.88	514.31	443.22
	ENSMUSG00000061039.5	Olfr920	-0.958926	1.72511	13.6656	0.00105136	0.0347749	82	78	43	38	33	24
	ENSMUSG00000062312.5	Erbb2	0.323566	6.82918	13.6649	0.00105164	0.0347749	1809	1716	1376	1638	1997	2011
	ENSMUSG00000063450.14	Syne2	0.318571	7.32644	13.6681	0.00105047	0.0347749	2431	2330	2151	2264	2848	2851
	ENSMUSG00000024529.14	Lox	-0.310912	7.3217	13.6604	0.00105325	0.0348075	3103	2792	2679	2143	2034	2179
	ENSMUSG00000074934.3	Grem1	-0.652543	2.6825	13.6581	0.0010541	0.0348147	139	128	105	76	64	77
	ENSMUSG00000102854.1	C130023A14Rik	2.32584	-0.809812	13.6523	0.0010562	0.0348635	3	2	2	4	19	11
	ENSMUSG00000015312.9	Gadd45b	0.355079	4.89305	13.6405	0.00106051	0.0349673	465	402	392	463	526	494
	ENSMUSG00000062014.13	Gmfb	0.316523	6.66851	13.6403	0.00106061	0.0349673	1673	1398	1322	1627	1571	1829
	ENSMUSG00000037643.14	Prkci	0.341618	6.43585	13.7825	0.00106124	0.0349674	1304	1150	1234	1246	1381	1695
	ENSMUSG00000047497.10	Adamts12	-0.640475	3.79388	15.5777	0.00107793	0.0354961	270	221	314	140	144	195
	ENSMUSG00000032289.15	Thsd4	-0.447371	3.94897	13.5904	0.00107907	0.0355125	285	288	280	174	196	208
	ENSMUSG00000017718.15	Afmid	-0.648561	2.61164	13.5816	0.00108234	0.0355717	114.94	122.54	113.52	69.08	67.14	71.44
	ENSMUSG00000030022.14	Adamts9	-0.356819	4.88	13.5804	0.00108279	0.0355717	563.76	508.24	519.64	368	402	375.97
	ENSMUSG00000036257.15	Pnpla8	0.328164	6.09747	13.5816	0.00108237	0.0355717	1054	944	937	1009	1066	1326
	ENSMUSG00000064351.1	mt-Co1	0.773522	12.931	22.642	0.00108402	0.035591	104531	82888.8	91756.8	125456	123374	192072
	ENSMUSG00000056133.5	Unc93a2	0.742778	2.79346	14.1201	0.00109449	0.0358709	99.28	100	49.53	111.96	131.06	139.48
	ENSMUSG00000059897.5	Zfp930	0.463026	3.7786	13.5524	0.00109334	0.0358709	199	173	182	226	237	241
	ENSMUSG00000114299.1	Gm47791	5.31117	-1.83798	13.8437	0.0010943	0.0358709	0	0	0	2	4	8
	ENSMUSG00000039115.13	Itga9	-0.386818	4.75594	13.5463	0.00109567	0.0358884	467	498	504	346	335	357
	ENSMUSG00000027931.12	Npr1	-0.396468	4.63999	13.5409	0.00109773	0.0359134	509.91	418.18	437.06	268.79	351.68	335.7
	ENSMUSG00000060691.4	Krtap19-1	7.53358	-0.230624	31.783	0.00109753	0.0359134	0	0	0	6	29	32.21
	ENSMUSG00000057440.8	Mpp7	0.529037	4.50784	15.474	0.00109973	0.0359577	322	259	315	332	368	497
	ENSMUSG00000095721.1	Gm7137	5.40502	-1.78368	13.8199	0.00110302	0.036044	0	0	0	1.13	9.05	4.89
	ENSMUSG00000067149.6	Jchain	0.914298	1.83536	13.5101	0.00110953	0.0362352	51	39	27	85	54	62
	ENSMUSG00000038332.13	Sesn1	0.318239	6.03329	13.5072	0.00111064	0.0362502	926	907	975	993	1083	1164
	ENSMUSG00000008193.13	Spib	-0.765504	2.386	13.4966	0.00111471	0.0362974	118	121	72	63	52	52
	ENSMUSG00000024896.9	Minpp1	0.36419	5.12481	13.4989	0.00111381	0.0362974	552.03	507.61	416.74	496.05	605.29	650.09
	ENSMUSG00000028082.14	Sh3d19	0.312027	6.90594	13.5014	0.00111286	0.0362974	1843	1634	1695	1743	2013	2176
	ENSMUSG00000087150.7	BC064078	0.432739	4.50519	13.4983	0.00111407	0.0362974	371	279	284	420	383	352
	ENSMUSG00000028383.17	Hsdl2	0.333308	5.68943	13.4937	0.00111584	0.0363129	755	689	757	768	837	960
	ENSMUSG00000035199.6	Arl6ip5	-0.296037	6.77183	13.486	0.00111884	0.036374	2119	1953	1760	1429	1447	1492
	ENSMUSG00000076431.4	Sox4	0.533633	3.71685	13.4855	0.00111903	0.036374	199	162	156	178	226	287
	ENSMUSG00000051817.8	Sox12	-0.631586	2.70455	13.4827	0.00112009	0.0363873	129	135	111	67	83	73
	ENSMUSG00000026166.14	Ccl20	1.28463	0.442783	13.4743	0.0011234	0.0364732	15	8	12	25	21	33
	ENSMUSG00000001493.9	Meox1	-0.59666	3.08513	13.4505	0.00113271	0.0367111	159	166	160	113	90	92
	ENSMUSG00000032440.13	Tgfbr2	-0.307502	7.40436	13.4526	0.00113189	0.0367111	3196	3062	2809	2083	2201	2471
	ENSMUSG00000048371.8	Pdp2	0.604008	3.02879	13.4519	0.00113216	0.0367111	94	101	113	132	137	165
	ENSMUSG00000020866.17	Cacna1g	-0.878395	3.92817	20.523	0.0011334	0.0367121	294	305	341	106	166	204
	ENSMUSG00000050394.14	Armcx6	-0.697548	2.35569	13.445	0.00113489	0.0367388	108	101	89	52.97	64	52
	ENSMUSG00000037206.15	Islr	-0.521276	5.2519	17.2614	0.00113686	0.036781	747	637	775	407	420	566
	ENSMUSG00000059213.7	Ddn	-1.22215	0.653017	13.4369	0.00113808	0.036799	41	24	32	13	9	16
	ENSMUSG00000009418.16	Nav1	-0.326118	6.8066	13.4323	0.00113991	0.0368368	1983.87	2055.83	1967.92	1296.85	1442.98	1694.93
	ENSMUSG00000021945.9	Zmym2	0.315864	5.73449	13.4263	0.00114228	0.0368917	848.21	742.59	704.44	796.48	852.91	983.07
	ENSMUSG00000027474.13	Ccm2l	-0.577157	3.23415	13.418	0.00114557	0.0369641	182	155	198	115	112	104
	ENSMUSG00000100213.1	Gm28151	0.875727	1.51659	13.4173	0.00114585	0.0369641	36	29	29	51	52	56
	ENSMUSG00000034457.10	Eda2r	0.490748	4.03018	13.4149	0.00114681	0.0369734	221	209	222	243	252	353
	ENSMUSG00000022679.13	Mpv17l	0.771253	2.14981	13.4088	0.00114926	0.0370093	59	48	48	73	68	103
	ENSMUSG00000026781.17	Acbd5	0.332045	5.55632	13.4089	0.00114923	0.0370093	691	683	637	709	734	894
	ENSMUSG00000035933.5	Cog5	0.33575	5.29519	13.4062	0.0011503	0.0370214	584.43	537.99	551.85	651.2	612.02	684.46
	ENSMUSG00000020695.14	Mrc2	-0.295118	6.31549	13.3908	0.00115649	0.0371932	1528	1381	1334	950	1092	1148
	ENSMUSG00000031385.14	Plxnb3	-0.741368	2.06709	13.3895	0.00115698	0.0371932	86	84	75	40	47	48
	ENSMUSG00000021193.10	Pitrm1	0.344815	5.75246	13.4012	0.0011603	0.0372784	815.5	719.8	757.49	742.97	904.36	1047.17
	ENSMUSG00000008734.9	Gprc5b	-0.367974	5.01091	13.3736	0.00116343	0.0373572	608.13	582.02	559.6	343	441.94	469
	ENSMUSG00000020400.17	Tnip1	-0.390948	5.87106	14.7912	0.0011646	0.0373731	1144	1181	890	779	811	659
	ENSMUSG00000021185.16	Dglucy	-0.479007	3.94058	13.3576	0.00116993	0.0375121	274.87	275.85	303.39	175.19	218.01	174
	ENSMUSG00000034449.7	Dhrs11	-0.554359	3.33457	13.3567	0.00117029	0.0375121	215	176	182	98	144	118
	ENSMUSG00000030824.17	Nucb1	-0.326885	7.33173	13.3547	0.00117111	0.0375167	3262	2966	2472	2152	2229	1979
	ENSMUSG00000026875.14	Traf1	-0.454487	5.55422	16.0371	0.0011765	0.0376678	863	881	871	627	646	485
	ENSMUSG00000029098.17	Acox3	-0.308719	7.51382	13.3261	0.00118286	0.0378495	3446.99	3340.54	3000	2203.53	2664.57	2418.3
	ENSMUSG00000046280.9	She	-0.458035	4.05652	13.3229	0.00118417	0.0378696	322	295	306	193	243	184
	ENSMUSG00000019254.16	Ppp1r12c	-0.33805	7.233	13.31	0.00118953	0.038019	2921	2882	2339	1937	2212	1769
	ENSMUSG00000024026.13	Glo1	0.324948	6.38674	13.3079	0.00119037	0.038024	1250.86	1178.24	1160.24	1167.72	1375.94	1614.25
	ENSMUSG00000022893.14	Adamts1	-0.390046	6.31108	14.9314	0.00119529	0.0381151	1646	1594	1134	1020	1087	950
	ENSMUSG00000029648.13	Flt1	-0.308235	5.80674	13.2962	0.00119525	0.0381151	1087	993	914	758	758	706
	ENSMUSG00000045027.7	Prss22	1.31516	0.346585	13.2981	0.00119446	0.0381151	11	14	7	18	25	31
	ENSMUSG00000105681.1	Gm43428	3.33486	-1.36847	13.2824	0.00120104	0.0382765	1	1	0	2	8	12
	ENSMUSG00000042804.13	Gpr153	-0.586912	3.90955	14.7173	0.00120194	0.0382833	305	294	266	126	176	231
	ENSMUSG00000108484.1	Gm18537	0.43238	4.00933	13.2764	0.00120356	0.0383129	246.14	210.49	204.26	273.02	268.7	276.6
	ENSMUSG00000015222.17	Map2	1.12168	5.56001	34.7741	0.00121095	0.0384391	556	527	361	777	901	1213
	ENSMUSG00000022803.12	Popdc2	-0.61167	3.02088	13.2597	0.00121059	0.0384391	162	155	149	73	90	119
	ENSMUSG00000023286.16	Ube2j2	-0.353939	5.49436	13.2587	0.001211	0.0384391	913.81	852.58	682.46	612.5	615.48	527.61
	ENSMUSG00000035504.16	Reep6	-0.805893	2.72834	14.5081	0.00121014	0.0384391	128	120	149	49	98	64
	ENSMUSG00000041479.14	Syt15	-0.530476	3.37461	13.2629	0.00120923	0.0384391	191	185	207	121	131	121
	ENSMUSG00000079722.2	Ttll2	1.38718	0.259017	13.2356	0.00122084	0.0387293	15.44	6.71	7.1	24.2	17.45	28.55
	ENSMUSG00000029716.13	Tfr2	1.05294	0.875032	13.232	0.00122236	0.0387555	18	18	18	28	36	40
	ENSMUSG00000054135.2	A430110L20Rik	0.871235	1.77806	13.2284	0.00122391	0.0387824	51	29	34	54	78	60
	ENSMUSG00000024786.9	Majin	-1.2626	0.532333	13.2251	0.00122534	0.0388055	25	38	26	12	14	8
	ENSMUSG00000005686.17	Ampd3	0.292901	5.86757	13.2124	0.0012308	0.0389238	917.12	856.1	765.73	895.29	995.14	973.82
	ENSMUSG00000038344.14	Txlng	0.420527	4.22508	13.214	0.0012301	0.0389238	283.36	256.54	231.41	296.57	294.48	359.27
	ENSMUSG00000042292.17	Mrtfa	-0.335603	5.80665	13.2115	0.00123118	0.0389238	1119	1054	852	687	839	677
	ENSMUSG00000022346.15	Myc	-0.508188	6.19299	18.256	0.00123363	0.0389568	1693	1441	1047	778	980	937
	ENSMUSG00000101599.1	Gm20342	0.570903	3.23651	13.2065	0.00123331	0.0389568	127	103	132	142	167	189
	ENSMUSG00000040918.12	Slc19a2	0.472932	4.55628	14.1022	0.00124205	0.0391778	404	301	251	342	413	463
	ENSMUSG00000074277.4	Phldb3	0.436178	4.26269	13.1871	0.00124174	0.0391778	285	296	207	302	352	326
	ENSMUSG00000003527.9	Ess2	-0.369119	4.89541	13.1793	0.00124515	0.0392533	605	537	478	352	439	363
	ENSMUSG00000040423.10	Rc3h1	0.306496	5.72445	13.1732	0.00124782	0.0393148	834	775	679	789	870	947
	ENSMUSG00000041538.16	H2-Ob	-0.666982	2.64073	13.1716	0.00124852	0.0393148	135	113	114	81	68	60
	ENSMUSG00000029119.9	Man2b2	-0.335183	5.7281	13.1603	0.00125346	0.0394482	1025	985	849	738	721	621
	ENSMUSG00000038641.12	Akr1d1	1.23613	0.739431	13.1549	0.00125581	0.0394997	20	16	9	23	27	48
	ENSMUSG00000009035.15	Tmem184b	-0.371229	6.35563	14.2985	0.00125801	0.039511	1696	1555	1231	1104	1133	936
	ENSMUSG00000014773.13	Dll1	0.3852	4.85936	13.1498	0.00125806	0.039511	475	365	377	441	558	464
	ENSMUSG00000081343.1	Gm16071	1.39976	0.234148	13.1493	0.00125831	0.039511	6.09	13	9	20	18	31
	ENSMUSG00000045752.13	Tssc4	-0.378619	4.71228	13.1451	0.00126017	0.039547	533.96	474.74	420.84	322.83	375	312.91
	ENSMUSG00000036291.6	Ap5m1	0.371325	4.80094	13.1429	0.00126113	0.0395546	396.65	364.61	407	461.83	461.69	472.05
	ENSMUSG00000115756.1	Gm49519	1.45209	0.221607	13.1405	0.00126218	0.0395653	4.91	13	9.41	22	16	31
	ENSMUSG00000027834.15	Serpini1	1.02638	1.31481	13.1368	0.00126384	0.0395891	32	27	17	31	51	61
	ENSMUSG00000090641.2	Zfp712	0.880611	1.63455	13.1356	0.00126437	0.0395891	38	27	37	65	52	56
	ENSMUSG00000036169.6	Sostdc1	0.535823	4.63332	15.6458	0.00126972	0.0397342	366	250	359	388	434	485
	ENSMUSG00000027315.13	Spint1	0.578879	5.46467	19.0475	0.00127585	0.0398643	653	582	482	604	795	967
	ENSMUSG00000035293.13	G2e3	0.425193	4.29254	13.1094	0.00127604	0.0398643	276	257	271	343	296	356
	ENSMUSG00000042675.15	Ypel3	0.312988	5.80625	13.112	0.00127486	0.0398643	837	820	754	794	939	1034
	ENSMUSG00000028378.6	Ptgr1	0.366222	4.94314	13.0901	0.00128472	0.0400903	508	431	363	494	552	494
	ENSMUSG00000036528.15	Ppfibp2	0.361217	5.29861	13.0904	0.0012846	0.0400903	561	594.47	508	531	700.6	744
	ENSMUSG00000030890.16	Ilk	-0.317641	6.72617	13.0838	0.00128756	0.0401564	2089.44	1815.1	1781.35	1402.97	1527.9	1263.11
	ENSMUSG00000026532.7	Spta1	-2.05049	-0.709151	13.081	0.00128885	0.0401741	12	8	17	3	3	2
	ENSMUSG00000033021.16	Gmppa	-0.310322	5.47923	13.0781	0.00129015	0.0401919	862	799	725	550	634	588
	ENSMUSG00000090942.1	F830016B08Rik	0.387145	6.09973	14.5726	0.00130019	0.0404653	1034	886	951	1018	1051	1400
	ENSMUSG00000106062.1	Gm43820	-1.76696	-0.435041	13.0556	0.00130039	0.0404653	13	17	15	2	4	6
	ENSMUSG00000048142.9	Nat8l	0.350476	5.30691	13.0195	0.00131702	0.0409414	657	575	456	644	698	631
	ENSMUSG00000052949.14	Rnf157	-0.549987	3.35657	13.0192	0.00131716	0.0409414	207	195	179	122	143	100
	ENSMUSG00000103901.1	Gm37499	1.47309	-0.143283	13.0152	0.00131903	0.0409763	6	7	7	14	17	21
	ENSMUSG00000039377.7	Hlx	-0.567082	3.36232	13.0079	0.00132243	0.041036	227	200	161	118	146	100
	ENSMUSG00000048764.16	Tmprss11f	1.93958	2.35482	26.1065	0.00132186	0.041036	38	43	20	72	107	180
	ENSMUSG00000016253.12	Nelfcd	-0.328166	5.08336	13.004	0.00132421	0.0410614	647	605	568	417	462	457
	ENSMUSG00000029765.12	Plxna4	-0.536066	3.30464	13.0029	0.00132473	0.0410614	173	196	187	120	115	119
	ENSMUSG00000027109.16	Sp3	0.288964	6.56493	12.9937	0.00132903	0.0411715	1437	1354.87	1326	1525.94	1545	1565
	ENSMUSG00000044748.8	Defb1	0.6882	3.3936	14.6529	0.00133102	0.0412104	143	141	103	153	163	259
	ENSMUSG00000037014.4	Sstr4	-3.71221	-1.54299	12.9817	0.00133468	0.0413006	7	8	4	0	1	0
	ENSMUSG00000076614.7	Ighg1	1.34643	0.770847	13.723	0.0013358	0.0413121	24	13	7	45	26	31
	ENSMUSG00000067851.11	Arfgef1	0.297265	6.62083	12.9704	0.00134002	0.0414195	1623	1369	1289	1516	1589	1733
	ENSMUSG00000050395.8	Tnfsf15	2.1508	-0.921832	12.9683	0.00134098	0.0414261	2	2	3	8	13	9
	ENSMUSG00000034647.15	Ankrd12	0.328777	5.20801	12.9558	0.00134689	0.0415856	582.61	502.18	497.79	550.07	622.12	660.55
	ENSMUSG00000034165.16	Ccnd3	-0.514752	6.58191	18.1489	0.0013487	0.0416181	2078.13	1863.77	1527.35	1237.74	1296.66	969.09
	ENSMUSG00000040016.16	Ptger3	0.846576	1.76366	12.9487	0.00135028	0.0416437	44	42	28	50	62	77
	ENSMUSG00000047669.8	Msl3l2	-0.649444	2.76773	12.9393	0.00135478	0.0417594	157	144	95	75	83	73
	ENSMUSG00000043257.15	Pigv	0.382735	4.53289	12.934	0.00135731	0.041814	348	305	315	346	429	390
	ENSMUSG00000000094.12	Tbx4	-0.604287	2.95012	12.93	0.00135923	0.0418498	141	163	138	71	104	94
	ENSMUSG00000021553.14	Slc28a3	1.14902	3.50103	22.5274	0.00136441	0.0419627	131	135	74	161	243	291
	ENSMUSG00000027858.13	Tspan2	-0.53086	3.51558	12.9198	0.00136412	0.0419627	195	221	227	113	146	154
	ENSMUSG00000022389.15	Tef	0.332269	7.12488	12.9159	0.00136601	0.0419861	2133	1901	1941	1908	2368	2683
	ENSMUSG00000074155.2	Klk5	1.20005	5.43217	35.3223	0.00136668	0.0419861	479	474	319	672	910	1112
	ENSMUSG00000038080.17	Kdm1b	0.334535	5.0555	12.9119	0.00136793	0.0420011	521.09	462.86	436.92	516.66	539.75	593.44
	ENSMUSG00000037685.15	Atp8a1	0.300264	6.16787	12.8849	0.00138106	0.0423807	1144	1086	893	1174	1202	1155
	ENSMUSG00000069917.7	Hba-a2	-1.45498	6.83135	43.469	0.00138997	0.0426306	2688.35	2301.54	3032.8	659.95	962.04	1103.58
	ENSMUSG00000020570.15	Sypl	0.294961	6.81669	12.8617	0.00139245	0.0426832	1752	1607	1539	1713	1797	2030
	ENSMUSG00000029920.9	Smarcad1	0.333081	5.08188	12.8533	0.0013966	0.0427867	537	458	453	523	559	598
	ENSMUSG00000028356.4	Ambp	-1.88506	-0.354108	12.8475	0.00139947	0.0428508	10	28	11	3	6	3
	ENSMUSG00000027993.16	Trim2	0.770388	5.40293	23.6855	0.00140195	0.0429032	554	465	492	652	698	1033
	ENSMUSG00000029311.16	Hsd17b11	-0.381743	5.2778	13.2699	0.00140628	0.0430118	763	727	630	567	463	461
	ENSMUSG00000028965.13	Tnfrsf9	-0.576157	3.11381	12.8155	0.00141537	0.043266	179	174	141	107	112	85
	ENSMUSG00000025375.15	Aatk	-0.393554	4.39211	12.8134	0.00141644	0.0432748	392	363	389	241	282	282
	ENSMUSG00000026842.16	Abl1	-0.29111	6.93788	12.8081	0.00141913	0.043333	2297	2250	1982	1587	1708	1617
	ENSMUSG00000004364.14	Cul3	0.309489	7.06298	12.798	0.00142421	0.0434643	2164	1911	1716	2020	2108	2476
	ENSMUSG00000072762.9	4930522L14Rik	0.683032	2.40081	12.7885	0.00142901	0.0435869	62.04	68.67	60.87	101.83	86.2	95.89
	ENSMUSG00000022517.17	Mgrn1	-0.336879	6.55284	13.0345	0.00143259	0.0436239	1890	1757	1435	1249	1353	1088
	ENSMUSG00000026442.14	Nfasc	-0.573672	2.92529	12.7833	0.00143164	0.0436239	153	134	144	85	86	96
	ENSMUSG00000050069.3	Grem2	-0.552836	3.19597	12.7819	0.00143237	0.0436239	187	163	169	121	102	102
	ENSMUSG00000025940.6	Tmem70	0.370995	4.67699	12.7758	0.00143545	0.043687	392	345	339	419	395	467
	ENSMUSG00000019929.16	Dcn	-0.363544	10.436	12.7646	0.00144117	0.043837	25850	24097	25356	16362	16513	21252
	ENSMUSG00000028127.10	Abcd3	0.298454	6.91637	12.7619	0.00144253	0.0438422	1870	1701	1669	1788	1958	2201
	ENSMUSG00000028940.2	Hes2	2.17084	-0.630875	12.9213	0.00144292	0.0438422	3	3	3	3	17	19
	ENSMUSG00000018599.5	Mief2	-0.386887	4.4055	12.751	0.00144816	0.0439153	418	405	334	255	270	289
	ENSMUSG00000024501.20	Dpysl3	-0.327799	6.9815	12.7541	0.00144657	0.0439153	2344	2145	2299	1454	1611	1940
	ENSMUSG00000037475.15	Thoc2	0.352564	5.54309	12.9005	0.0014485	0.0439153	621	683	667	763	697	866
	ENSMUSG00000039735.16	Fnbp1l	0.33849	6.09098	13.0307	0.0014472	0.0439153	1034	920	954	960	1091	1349
	ENSMUSG00000024927.8	Rela	-0.449185	6.4748	16.1218	0.00146187	0.0442964	1935	1748	1307	1067	1280	1002
	ENSMUSG00000000303.12	Cdh1	0.32071	8.0532	12.7208	0.00146375	0.0443294	4327	3702	3431	3779	4579	4831
	ENSMUSG00000051444.9	Bbs12	0.530252	3.28289	12.7154	0.00146657	0.0443696	138	114	129	171	157	179
	ENSMUSG00000069830.10	Nlrp1a	0.861932	2.41513	13.8363	0.00146669	0.0443696	54.16	57	68.19	121.27	111	68
	ENSMUSG00000045414.7	Dipk2a	0.420553	4.83645	13.2396	0.00146786	0.0443809	429	376	374	461	406	587
	ENSMUSG00000049115.15	Agtr1a	-0.700056	2.4739	12.7083	0.00147027	0.0444295	99	114	110	54	53	77
	ENSMUSG00000008398.15	Elk3	-0.385968	6.33786	14.3722	0.00147247	0.0444717	1695.83	1522.45	1228.81	1069.73	1145.02	901.63
	ENSMUSG00000027598.16	Itch	0.306705	5.94349	12.6992	0.00147502	0.044515	953	873	834	939	945	1149
	ENSMUSG00000034586.14	Hid1	-0.60039	2.97596	12.6983	0.00147551	0.044515	176	153	123	77	111	86
	ENSMUSG00000029185.14	Fam114a1	-0.343046	5.30376	12.689	0.00148038	0.0446376	686	687	749	518	506	522
	ENSMUSG00000044322.7	Dsc1	1.30258	7.48351	38.4952	0.00148538	0.0447642	1853	1821	1343	2918	3501	4997
	ENSMUSG00000009555.16	Cdk9	-0.296739	6.50667	12.6702	0.00149033	0.044806	1763	1681	1412	1155	1313	1167
	ENSMUSG00000020886.17	Dlg4	-0.403982	4.24116	12.6698	0.00149054	0.044806	349	360	325	224	231	266
	ENSMUSG00000021111.15	Papola	0.293029	7.34944	12.675	0.00148779	0.044806	2546	2274	2271	2554	2662	2790
	ENSMUSG00000040495.4	Chrm4	1.30372	0.298667	12.6722	0.00148926	0.044806	10	12	9	24	16	31
	ENSMUSG00000051427.14	Ccdc157	-0.369533	4.64746	12.6693	0.00149081	0.044806	458	441	458	293	328	350
	ENSMUSG00000040432.5	Ltb4r2	0.368301	4.90759	12.6631	0.0014941	0.0448804	409	475	379	456	552	497
	ENSMUSG00000024576.14	Csnk1a1	0.322125	8.38877	12.6579	0.00149686	0.044939	5449	4708	4299	5003	5404	6227
	ENSMUSG00000024770.14	Lipn	1.08215	1.11499	12.6563	0.00149772	0.0449406	26	25	13	32	34	59
	ENSMUSG00000068391.8	Chrac1	-0.375447	4.5484	12.652	0.00149999	0.0449844	425	424.73	419.45	304	297.45	301
	ENSMUSG00000027523.20	Gnas	-0.32346	8.5724	12.6492	0.00150148	0.044997	7036.93	6589.01	6815.3	4407.31	5130.28	5575.92
	ENSMUSG00000080902.1	Ywhaq-ps3	0.463693	3.75961	12.6482	0.00150204	0.044997	174.42	202.99	168.54	221.06	229.17	244.95
	ENSMUSG00000032766.9	Gng11	-0.440599	4.12531	12.6445	0.001504	0.045011	357	333	277	239	197	217
	ENSMUSG00000071477.10	Zfp777	-0.371447	4.76044	12.6443	0.00150413	0.045011	548	501	427	298	391	362
	ENSMUSG00000009030.14	Pdcl	0.356544	4.90072	12.6331	0.00151011	0.0451656	451	417	396	491	451	548
	ENSMUSG00000033987.16	Dnah17	-0.563048	3.71391	13.2768	0.00151138	0.0451791	264.03	290	197	164	177.01	125
	ENSMUSG00000060284.7	Sp7	-0.814328	3.66539	17.3163	0.00151685	0.0453182	259	239	273	98	120	189
	ENSMUSG00000033857.12	Engase	-0.477234	4.40894	13.4291	0.00151976	0.0453808	380.86	383.53	419.31	198.59	305.51	284.5
	ENSMUSG00000041431.16	Ccnb1	0.352524	5.63511	12.916	0.00152853	0.0456179	686.16	646.41	766.95	844.35	794.92	838.4
	ENSMUSG00000076652.4	Ighv7-3	2.30451	-0.836593	12.5907	0.00153313	0.0457307	5	2	0	11	8	14
	ENSMUSG00000033685.13	Ucp2	-0.394117	8.38652	13.7047	0.00153731	0.0458307	6980.91	6026.96	5437.89	4585.75	4659.91	3610.75
	ENSMUSG00000030016.14	Zfp638	0.306739	6.09745	12.5805	0.00153871	0.0458479	1043	887	1023	1069	1128	1176
	ENSMUSG00000036087.18	Slain2	0.309907	7.01908	12.5671	0.00154611	0.0460436	2016.41	1812.48	1775.89	1918.19	2036.82	2454.6
	ENSMUSG00000003153.10	Slc2a3	-0.454918	3.76927	12.5626	0.00154859	0.0460926	253	275	227	154	181	173
	ENSMUSG00000016262.14	Sertad4	0.327034	5.80741	12.5563	0.00155207	0.0461714	877	732	791	775	955	1053
	ENSMUSG00000027456.8	Sdcbp2	1.11847	3.92462	23.8209	0.00155509	0.0462363	158	204	101	248	312	366
	ENSMUSG00000035863.14	Palm	-0.360985	5.47368	12.8677	0.00156395	0.0464748	861	868	687	575	651	502
	ENSMUSG00000034265.8	Zdhhc14	-0.734295	2.04377	12.5204	0.00157208	0.0466429	89	86	66	42	42	49
	ENSMUSG00000038539.15	Atf5	-0.315992	5.65601	12.5208	0.00157186	0.0466429	968.51	904	829	558	706	740
	ENSMUSG00000084235.2	Gm15421	0.560338	2.94855	12.5204	0.00157213	0.0466429	108.12	99	90.87	124.58	129.76	149.54
	ENSMUSG00000074570.14	Cass4	-0.523462	3.80938	12.7867	0.00157406	0.0466751	255.03	331	206.57	170.54	174.78	160.79
	ENSMUSG00000026674.9	Ddr2	-0.33074	7.26722	12.5077	0.00157926	0.046738	2905	2728	2663	1730	1945.95	2423
	ENSMUSG00000030556.13	Lrrc28	0.462613	4.63573	13.5722	0.00157955	0.046738	392	342	278	337	427	521
	ENSMUSG00000032532.7	Cck	-1.22353	0.509648	12.5112	0.00157726	0.046738	29	36	22	13	8	13
	ENSMUSG00000039840.8	Epg5	0.310419	5.68348	12.5083	0.00157889	0.046738	844	729	650	769	829	938
	ENSMUSG00000028957.12	Per3	0.356951	5.29899	12.5044	0.00158979	0.0470157	600	501	564	544	674	755
	ENSMUSG00000078784.8	Rbis	0.353418	5.04497	12.4727	0.00159918	0.0472684	540.29	452.33	410.97	510.75	514.42	623.37
	ENSMUSG00000022462.7	Slc38a2	0.3119	8.07191	12.4659	0.00160304	0.0473573	4225	3638	3757	3890	4604	4825
	ENSMUSG00000026983.10	Il1f5	1.53115	6.5045	43.6243	0.00161035	0.0475477	873	890	512	1654	1975	2408
	ENSMUSG00000057396.7	Zfp759	0.789679	1.87878	12.4499	0.00161225	0.0475785	40	36	50	63	67	72
	ENSMUSG00000032119.5	Hinfp	0.321785	5.54192	12.445	0.00161513	0.0476382	659	717	622	661	820	828
	ENSMUSG00000033278.10	Ptprm	-0.481841	4.13486	12.7673	0.0016275	0.0479519	307	313	358	183	204	263
	ENSMUSG00000113184.1	Gm49654	0.617143	3.16011	12.6053	0.00162704	0.0479519	130	126	83	121	162	196
	ENSMUSG00000019467.15	Arhgef25	-0.453009	4.39848	12.8009	0.0016285	0.0479559	382	381	405	200	284	308
	ENSMUSG00000008153.12	Clstn3	-0.532592	3.24905	12.4149	0.00163263	0.048052	198	186	153	94	119	129
	ENSMUSG00000031065.14	Cdk16	-0.287878	7.04506	12.4098	0.0016356	0.0481078	2598	2322	2115	1621	1837	1847
	ENSMUSG00000054814.14	Usp46	0.394884	4.81077	12.442	0.00163626	0.0481078	412	383.48	374.34	395	444.25	581.67
	ENSMUSG00000036733.16	Rbm42	-0.38488	5.66219	13.6188	0.00163955	0.048179	1109.11	928.53	746.47	646.03	720.7	584.57
	ENSMUSG00000027306.15	Nusap1	0.37281	5.31935	12.8304	0.0016476	0.0483898	563.57	491	617.8	633	641	730.81
	ENSMUSG00000099889.1	Mrgprb11-ps	1.82902	-0.629946	12.3854	0.00165	0.0484345	4	4	3	9	18	10
	ENSMUSG00000033031.13	Cip2a	0.379022	4.53143	12.3738	0.0016569	0.0485945	365	302	303	399	368	392
	ENSMUSG00000055193.4	Klk15	2.65273	-1.17917	12.3733	0.0016572	0.0485945	2	1	1	9	3	13.29
	ENSMUSG00000035247.16	Hectd1	0.323162	7.74456	12.3611	0.00166448	0.0487822	3206.89	3066.65	2940.3	2978.99	3577.9	4105.39
	ENSMUSG00000009563.16	Tor2a	-0.371932	4.90406	12.3555	0.0016678	0.0488201	604	584	445	379	424	355
	ENSMUSG00000010051.15	Hyal1	0.329073	5.37467	12.3515	0.00167018	0.0488201	679.96	579.55	520.98	621.27	776.47	661.17
	ENSMUSG00000029554.15	Mad1l1	-0.392304	4.51967	12.3525	0.00166961	0.0488201	459	411	384	283	336	260
	ENSMUSG00000038042.11	Ptpdc1	-0.436329	3.94904	12.3525	0.00166961	0.0488201	290	269.97	290	185	181.91	213
	ENSMUSG00000118458.1	AL844494.3	-5.21682	-1.84033	12.6057	0.00166687	0.0488201	2.35	5.74	5.55	0	0	0
	ENSMUSG00000030604.9	Zfp626	0.412114	4.19851	12.3494	0.00167146	0.0488318	255	254	248	278	297	356
	ENSMUSG00000027875.12	Hmgcs2	-0.713475	2.07146	12.3448	0.00167425	0.0488876	86	82	76	43	43	51
	ENSMUSG00000022351.14	Sqle	0.594126	6.20883	19.7088	0.00168561	0.0491934	1050	927	877	1017	1308	1659
	ENSMUSG00000026203.16	Dnajb2	0.322051	5.87442	12.3219	0.00168807	0.0492393	914	863	747	786	1039	1088
	ENSMUSG00000030002.15	Dusp11	0.304834	7.66877	12.3142	0.00169276	0.049324	3048	2852	2897	3047	3274	3719
	ENSMUSG00000030108.14	Slc6a13	1.40249	0.485989	12.7362	0.00169192	0.049324	12	12	10	14	23	47
	ENSMUSG00000111264.1	E030022I16Rik	-1.35348	0.473039	12.3239	0.00169724	0.0494287	33	40	14	7	14	10
	ENSMUSG00000001729.14	Akt1	-0.31317	7.47966	12.2945	0.00170479	0.0495965	3597	3218	2781	2405	2490	2189
	ENSMUSG00000072915.3	Gm12258	0.554605	3.53668	12.4782	0.00170472	0.0495965	138	131	179.01	169.55	217.15	224.62
	ENSMUSG00000051098.6	Mblac2	0.605924	2.95514	12.2847	0.00171085	0.0497466	120	75	99	130	129	153
	ENSMUSG00000118291.1	Csf1r-ps	-1.54067	-0.238825	12.2791	0.00171427	0.04982	14.02	18.05	19.05	5.02	4.02	7.01
	ENSMUSG00000046324.12	Ermp1	0.289445	6.56653	12.2745	0.00171713	0.049877	1481	1293	1349	1464	1508	1675
	ENSMUSG00000023074.11	Mospd1	0.432279	4.35042	12.2641	0.00172355	0.049987	300.79	281.98	253.92	270.85	348.92	423.86
	ENSMUSG00000033454.6	Zbtb1	0.292719	5.76972	12.2623	0.00172471	0.049987	830	777	761	805	898	975
	ENSMUSG00000049404.7	Rarres1	0.416829	4.517	12.262	0.00172487	0.049987	332	338	276	305	400	462
	ENSMUSG00000053347.15	Zfp943	0.421618	4.37492	12.2611	0.00172543	0.049987	338	285	235	360	309	383.82
	ENSMUSG00000070000.13	Fcho1	0.388923	4.69306	12.2666	0.00172202	0.049987	394	391	298	360	464	483
	ENSMUSG00000100967.1	Gm29666	0.76461	2.04822	12.2589	0.00172677	0.0499998	51	39	54	59	80	88
	ENSMUSG00000022622.5	Acr	-1.57488	-0.294978	12.2537	0.00173005	0.0500546	15	15	19	4	4	7
	ENSMUSG00000049709.4	Nlrp10	1.37333	6.23714	39.557	0.00173047	0.0500546	757	783	503	1322	1486	2063
	ENSMUSG00000037570.16	Mcrs1	-0.348261	5.19584	12.2469	0.00173427	0.0501383	764.04	659.6	562.72	468.82	529.35	434.02
	ENSMUSG00000109654.1	Gm3912	1.16249	0.572421	12.2431	0.00173665	0.0501807	17.58	11.05	12.42	22.48	25.52	37.37
	ENSMUSG00000043421.8	Hilpda	-0.657607	3.76103	14.6726	0.00173997	0.0502507	295	310	193	176	159	127
	ENSMUSG00000027338.16	Prnd	-0.958224	1.16072	12.2324	0.00174335	0.0502931	53	42	39	25	20	17.88
	ENSMUSG00000037754.13	Ppp1r16b	-0.50608	4.04282	12.8433	0.0017448	0.0502931	331	323	275	239	196	164
	ENSMUSG00000069727.5	Zfp975	0.712809	2.24932	12.2297	0.00174507	0.0502931	67.77	54.33	48.79	94.44	70.51	91.64
	ENSMUSG00000074649.6	BC029722	-0.382376	4.54303	12.2333	0.00174282	0.0502931	483.57	419.82	368.85	303.82	317.47	274.54
	ENSMUSG00000043131.14	Mob1a	0.299995	8.20849	12.2256	0.00174765	0.0503412	4576	4227	4032	4885	4821	4832
	ENSMUSG00000059486.11	Kbtbd2	0.29087	5.63374	12.2189	0.00175187	0.0504366	742	732.98	681	760.88	822	850
	ENSMUSG00000001247.16	Lsr	0.35588	5.07147	12.2148	0.00175447	0.0504851	567.11	448.22	413.98	475.89	595.95	611.2
	ENSMUSG00000024866.10	Acy3	-0.879142	1.56324	12.211	0.00175686	0.0505276	80	48	49	27	28	33
	ENSMUSG00000062826.7	Ces2f	1.62316	5.57878	42.3565	0.00175786	0.0505303	398	441	297	838	949.2	1444
	ENSMUSG00000074577.9	Ripor3	0.652116	4.02501	15.4047	0.0017595	0.0505511	243	225	145	227	306	353
	ENSMUSG00000025860.15	Xiap	0.300545	6.31143	12.2	0.00176389	0.0506249	1251	1092	1099	1279	1186	1438
	ENSMUSG00000118012.1	Gm46620	0.444673	3.97291	12.201	0.00176324	0.0506249	249.88	215.65	175.85	225.97	293.8	284.33
	ENSMUSG00000024274.10	Zscan30	0.916626	1.40965	12.1936	0.00176793	0.0506883	29	23	33	41	46	62
	ENSMUSG00000047564.4	Krtap3-1	4.33826	3.3164	47.6769	0.00176776	0.0506883	18	16	11	142	239.29	472.38
	ENSMUSG00000020483.14	Dynll2	-0.28527	7.01628	12.1893	0.00177068	0.0507145	2489	2344	2055	1609	1747	1848
	ENSMUSG00000034349.14	Smc4	0.288219	6.60602	12.1902	0.00177012	0.0507145	1502	1345	1391	1572	1532	1665
	ENSMUSG00000020327.4	Fgf22	1.03998	2.3705	15.2925	0.00177378	0.0507582	53	74	34	71	101	134
	ENSMUSG00000109209.1	Gm45104	0.521128	3.54183	12.1841	0.00177403	0.0507582	157	168	134	159	201	249
	ENSMUSG00000047898.7	Ccr4	0.691672	2.16388	12.1817	0.00177558	0.0507764	62	49	51	77	86	78
	ENSMUSG00000026327.8	Serpinb11	0.458289	3.76182	12.1793	0.00177714	0.0507946	189	176	183	205	223	268
	ENSMUSG00000097310.2	A930038B10Rik	2.41095	-1.11118	12.1681	0.00178429	0.0509728	3	1	1	7	13.46	6
	ENSMUSG00000006014.16	Prg4	-0.386673	11.024	12.5666	0.00179168	0.0511311	42408	35066.4	36824.5	21047.6	31159.3	28675.1
	ENSMUSG00000032715.9	Trib3	0.585572	3.02067	12.1579	0.00179088	0.0511311	132	103	77	133	157	139
	ENSMUSG00000035722.15	Abca7	-0.299178	6.02814	12.1536	0.00179373	0.0511369	1304	1191	994	853	925	825
	ENSMUSG00000086859.4	Snhg20	-0.402108	4.24264	12.1543	0.00179324	0.0511369	368.51	369	299.25	243.29	252	226
	ENSMUSG00000060756.5	Krtap2-4	6.19996	1.41797	36.3506	0.00179691	0.0512014	3.25	0	0	36.27	61.27	134.4
	ENSMUSG00000027115.14	Kif18a	0.589219	2.88283	12.1463	0.00179845	0.0512189	107	78	96	136	127	126
	ENSMUSG00000015452.14	Ager	-0.82825	1.85838	12.1432	0.00180048	0.0512505	84	73	59	25	50	37
	ENSMUSG00000020486.19	2004-09-01	-0.508586	3.39946	12.1386	0.00180343	0.0513062	232	201	161	122	121	140
	ENSMUSG00000098132.1	Rassf10	0.607905	2.786	12.1373	0.00180429	0.0513062	101	85	75	95	136	136
	ENSMUSG00000026335.16	Pam	-0.324536	7.18837	12.1299	0.00180914	0.0513952	2713	2473	2643	1641	1897	2250
	ENSMUSG00000069208.9	Zfp825	0.491022	3.52027	12.1297	0.00180928	0.0513952	163.31	159.7	134.94	198.74	174.32	219.47
	ENSMUSG00000095079.6	Igha	0.483473	3.94494	12.1887	0.00181071	0.0514095	244	204	172	296	221	276
	ENSMUSG00000025240.10	Sacm1l	0.298031	6.01246	12.124	0.00181298	0.0514476	973	897	924.53	1009.93	990.51	1170
	ENSMUSG00000049214.13	Skint7	0.831664	1.72235	12.1202	0.00181548	0.0514922	43.15	30.63	36.64	44.3	66.47	73.08
	ENSMUSG00000021047.7	Nova1	-0.535984	3.86702	12.8496	0.00181691	0.0515064	245.45	279	299	133	189	206
	ENSMUSG00000005973.6	Rcn1	0.279549	6.74682	12.1158	0.00181839	0.0515221	1694	1566	1437	1680	1722	1846
	ENSMUSG00000031310.16	Zmym3	-0.313712	5.5432	12.1108	0.00182166	0.0515883	853	775	860	563	624	664
	ENSMUSG00000106928.1	Gm43860	-0.621156	2.61829	12.1089	0.00182291	0.0515973	131	113	108	57	80	74
	ENSMUSG00000038112.15	AW551984	-0.487341	3.66711	12.1069	0.00182426	0.051609	245	236	228	138	138	191
	ENSMUSG00000021432.15	Slc35b3	-0.32979	5.00355	12.1035	0.00182649	0.0516459	596.03	612.91	514.33	394	442.43	427.12
	ENSMUSG00000026707.15	Nsun6	0.566907	2.82821	12.1016	0.00182778	0.0516561	98	92	83	111	128	134
	ENSMUSG00000025626.16	Phf6	0.404387	4.57598	12.0996	0.0018291	0.051667	403	330	262	369	384	455
	ENSMUSG00000013584.5	Aldh1a2	-0.405643	4.24706	12.0974	0.00183053	0.051681	408	348	288	231	257	235
	ENSMUSG00000025279.7	Dnase1l3	0.41574	4.2241	12.0912	0.00183466	0.0517713	278	288	207	310	331	306
	ENSMUSG00000090958.2	Lrrc32	-0.345933	5.89726	12.664	0.00184058	0.0519118	1126	1115	982	792	879	661
	ENSMUSG00000024039.15	Cbs	0.524448	3.77186	12.4181	0.00185533	0.0522069	181	195	162	171	259	287
	ENSMUSG00000029406.15	Pitpnm2	-0.288187	5.86948	12.0611	0.0018548	0.0522069	1130	1006	971	688	831	828
	ENSMUSG00000032549.7	Rab6b	-0.424621	4.36974	12.0597	0.00185575	0.0522069	385	339	411	248	235	299
	ENSMUSG00000032652.13	Crebl2	0.441292	4.01849	12.0642	0.00185269	0.0522069	212	222	225	236	271	322
	ENSMUSG00000069722.4	Krtap3-3	4.65508	4.02736	48.3022	0.00185481	0.0522069	22.21	27.77	9.79	207.03	504.99	702.78
	ENSMUSG00000109015.1	Gm31024	0.915555	1.19275	12.0573	0.00185732	0.0522244	30	22	21	37	45	45
	ENSMUSG00000022844.8	Pdia5	-0.516504	3.24541	12.029	0.00187651	0.0527375	170	190	171	103	125	115
	ENSMUSG00000026712.3	Mrc1	0.290758	6.92534	12.027	0.00187789	0.0527495	1722	1804	1748	1864	2025	2075
	ENSMUSG00000069763.3	Tmem100	-0.697484	4.4101	17.2604	0.00188372	0.0528864	423	393	444	184	218	319
	ENSMUSG00000038210.10	Hoxa11	-0.5707	2.81326	12.0169	0.00188477	0.052889	140.37	129	129.16	77.93	79.15	90.06
	ENSMUSG00000023927.15	Satb1	-0.361299	4.67624	12.0136	0.00188704	0.0528979	459.99	442	478	312.98	330.98	349
	ENSMUSG00000032328.12	Tmem30a	0.307061	6.79937	12.0123	0.00188795	0.0528979	1823	1630	1379	1761	1692	2037
	ENSMUSG00000044340.7	Phlpp1	-0.33858	4.93484	12.014	0.00188677	0.0528979	569	537	538	401	419	378
	ENSMUSG00000048000.15	Gigyf2	0.279714	6.65094	12.0073	0.00189137	0.0529671	1548.09	1447.21	1394.14	1472	1700.59	1744.61
	ENSMUSG00000027412.12	Lpin3	0.391612	4.73416	12.0043	0.00189343	0.0529978	417	392	305	373	445	528
	ENSMUSG00000007805.4	Twist2	-0.709676	2.09827	11.995	0.0018998	0.0531076	82.22	81.95	84.06	43.46	42.82	54.17
	ENSMUSG00000060743.12	H3f3a	0.294421	8.51092	11.993	0.00190118	0.0531076	5615.64	5248.03	4995.54	5675.78	6055.09	6195.24
	ENSMUSG00000066735.8	Vkorc1l1	0.286753	5.98134	11.9942	0.00190038	0.0531076	1029.73	874.05	850.81	962.55	1012.66	1117.86
	ENSMUSG00000114957.1	Gm47316	1.23934	0.453274	11.9934	0.00190094	0.0531076	10	18	8	20	32	27
	ENSMUSG00000006442.10	Srm	-0.322105	5.08816	11.9787	0.00191115	0.0533591	685	610	532	429	457	457
	ENSMUSG00000038354.13	Ankrd35	0.396192	7.35727	13.6887	0.00191249	0.0533697	2524	2563.99	1793	2336	3077	2919
	ENSMUSG00000071072.12	Ptges3	0.292623	6.51649	11.9707	0.00191671	0.0534605	1518.29	1282.07	1189.54	1443.47	1417.2	1631.47
	ENSMUSG00000004849.14	Ap1s1	-0.304239	6.05598	11.9691	0.00191778	0.0534633	1317	1249	997	877	941	830
	ENSMUSG00000034164.17	Emid1	-0.826536	1.7666	11.9644	0.00192108	0.0535284	68	59	74	25	44	36
	ENSMUSG00000021711.17	Trappc13	0.336439	5.14975	11.9591	0.00192482	0.0535955	563.81	457.64	493.25	564.26	549.57	648.2
	ENSMUSG00000028049.15	Scamp3	-0.339957	5.51035	12.0203	0.00192542	0.0535955	959.71	836.03	672.52	629.06	599.26	556.59
	ENSMUSG00000031570.17	Plpp5	-0.365089	4.44782	11.9518	0.00192987	0.0536926	418	380	383	274	289	282
	ENSMUSG00000038059.7	Smim3	-0.719249	3.96274	16.0977	0.00193231	0.0537334	346	358	230	183	202	134
	ENSMUSG00000020411.2	Nipal4	0.575958	5.10043	16.7042	0.00193821	0.0537355	498	462	374	457	623	756
	ENSMUSG00000021306.11	Gpr137b	-0.341063	5.15662	11.9424	0.00193653	0.0537355	688.22	636.51	597.5	490.76	489.95	414.43
	ENSMUSG00000031536.6	Polb	0.347395	5.56633	12.2525	0.0019367	0.0537355	669	673	668	639	807	924
	ENSMUSG00000031613.9	Hpgd	0.412305	4.30533	11.9403	0.00193803	0.0537355	306	261	251	317	293	392
	ENSMUSG00000038085.13	Cnbd2	0.834028	3.83031	17.5692	0.00193567	0.0537355	137.55	157.92	192.1	251.33	337.75	218.78
	ENSMUSG00000042010.16	Acacb	-0.419828	6.03758	14.5167	0.00193389	0.0537355	1158	1187	1271	679	846	985
[truncated: 53,422 more rows]

## Sheet: b DEGsGzmaKO+CHIKVvs6J+CHIKV 
Genes in a with 1 filter applied; q<0.01	Ensembl Gene ID	gene_id	logFC	logCPM	F	PValue	FDR	C57_1	C57_2	C57_3	GrzA_1	GrzA_2	GrzA_3
	ENSMUSG00000090338.2	Gm17081	-7.23696	-0.415302	59.0569	7.42025e-08	3.30323e-05	14.48	20	24.34	0	0	0
	ENSMUSG00000093996.2	Fam205a3	-7.19844	-0.43898	62.2294	4.7353e-08	2.4758e-05	21.84	16.58	17.72	0	0	0
	ENSMUSG00000118434.1	AL824709.1	-6.60297	1.47718	186.975	3.08838e-13	1.90179e-09	85.21	91.28	72.96	1.83	0	0
	ENSMUSG00000090015.8	Gm15446	-6.5941	3.04763	512.217	2.18201e-18	1.20929e-13	259.26	272.06	239.06	1.13	1.14	4.67
1073 DEGs	ENSMUSG00000098248.1	Gm27222	-6.09773	-1.29318	23.4854	6.49709e-05	0.00438048	4.12	8.71	12.63	0	0	0
469 Down DEGs	ENSMUSG00000102660.1	Gm38378	-6.07575	-1.29599	25.0284	4.38591e-05	0.0032868	11.5	5	9	0	0	0
	ENSMUSG00000104371.1	Gm37513	-6.07575	-1.29599	25.0284	4.38591e-05	0.0032868	11.5	5	9	0	0	0
	ENSMUSG00000096862.2	Gm13301	-6.0198	-1.33435	24.7358	4.72031e-05	0.00349272	10.65	5.69	8.49	0	0	0
	ENSMUSG00000029369.17	Afm	-5.96362	-1.37353	22.4821	8.45126e-05	0.0053104	11	4	9	0	0	0
	ENSMUSG00000094526.1	Gm21451	-5.8354	-1.45619	19.5276	0.000190317	0.00987598	7.38	11.79	3.42	0	0	0
	ENSMUSG00000023132.8	Gzma	-5.58517	4.86047	690.231	7.63201e-11	1.69189e-07	838	901	977	22	10	20
	ENSMUSG00000103105.5	Gm18752	-4.90428	-0.714055	36.8127	2.25577e-06	0.000390677	17.3	17.99	8.79	0	1.4	0
	ENSMUSG00000066677.12	Ifi208	-4.63277	5.04971	414.659	1.36596e-07	5.18513e-05	1151.76	1187.17	736.67	46.39	30.52	36.15
	ENSMUSG00000073400.6	Trim10	-4.33409	-1.14907	19.2861	0.000174113	0.00935031	3	14	12	0	1	0
	ENSMUSG00000048636.7	A730049H05Rik	-3.92309	-0.418439	34.082	4.04989e-06	0.000595355	22.23	17.76	15.36	0	0	3.03
	ENSMUSG00000063458.13	Lrmda	-3.91664	0.566634	81.8623	1.96681e-09	2.0962e-06	39	46	35	1	2	4
	ENSMUSG00000027556.15	Car1	-3.78809	-0.929384	23.2555	5.64547e-05	0.00398063	15	6	14	1	1	0
	ENSMUSG00000021922.17	Itih4	-2.94039	-0.843593	19.1685	0.000180315	0.0095686	13	12	11	2	0	2
	ENSMUSG00000072601.4	Ear1	-2.87385	0.271503	48.0606	2.6042e-07	8.31114e-05	30.62	31	28.22	4.08	2.13	5
	ENSMUSG00000098975.7	Gm27177	-2.70833	3.0279	192.869	2.17596e-13	1.72277e-09	176.97	251.51	235.18	29.28	32.37	33.21
	ENSMUSG00000047953.7	Gp5	-2.59496	-0.0560146	29.5214	1.14904e-05	0.00131031	26	26	16	5	4	1
	ENSMUSG00000027073.5	Prg2	-2.45436	2.19612	97.2621	3.50555e-10	5.71416e-07	149	126	87	24	13	23
	ENSMUSG00000056399.2	Prss34	-2.38696	-0.337314	23.399	5.43047e-05	0.00388302	24	14	15	3	2	4
	ENSMUSG00000052234.2	Epx	-2.32077	0.786758	45.6863	3.98712e-07	0.000109553	55	37	35	8	5	10
	ENSMUSG00000020125.7	Elane	-2.26078	1.41831	35.5244	4.5505e-05	0.00338736	100	49	53	19	6	13
	ENSMUSG00000029372.7	Ppbp	-2.23823	2.08678	74.1788	1.33086e-08	9.13263e-06	126	110	90	25	11	27
	ENSMUSG00000006574.15	Slc4a1	-2.2209	1.53972	57.9178	5.10634e-08	2.57271e-05	78	89	52	8	16	19
	ENSMUSG00000000157.16	Itgb2l	-2.0913	0.867348	42.369	7.41399e-07	0.000177108	53	33	45	10	9	9
	ENSMUSG00000048489.12	Depp1	-1.95719	1.72586	65.7846	1.59318e-08	1.05114e-05	86	85	71	21	18	18
	ENSMUSG00000112963.1	Gm6093	-1.81474	2.58506	67.0156	4.06925e-08	2.18954e-05	165.13	130.37	144	53	32.48	29
	ENSMUSG00000026835.15	Fcnb	-1.78086	0.0703119	19.6858	0.000154703	0.00852263	23	20	25	7	7	4
	ENSMUSG00000020893.17	Per1	-1.71008	6.49626	304.675	2.42783e-14	4.4851e-10	2624	2337	1757	569	685	629
	ENSMUSG00000072244.11	Trim6	-1.70146	2.05766	35.2426	2.83352e-05	0.0024966	109	121	67	38	28	17
	ENSMUSG00000038357.10	Camp	-1.6897	3.06288	50.2669	1.66596e-05	0.00174206	246	181	179	81	44	46
	ENSMUSG00000091542.1	Gm17167	-1.54446	0.863163	23.2785	5.61051e-05	0.00397622	32.36	45.81	42.04	8	14.85	15
	ENSMUSG00000040314.2	Ctsg	-1.53256	1.14919	30.1575	9.88216e-06	0.00115972	61	46	42	16	14	17
	ENSMUSG00000017737.2	Mmp9	-1.3801	5.77887	100.959	2.74787e-06	0.000445292	1558	1030	1248	486	422	443
	ENSMUSG00000003379.7	Cd79a	-1.3234	2.22488	32.7033	6.11353e-06	0.000799099	137	98	79	49	30	35
	ENSMUSG00000033717.6	Adra2a	-1.29693	1.70798	29.8668	1.05846e-05	0.00121704	77	65	72	28	30	22
	ENSMUSG00000036596.6	Cpz	-1.25686	1.55268	22.3519	7.23063e-05	0.00472557	77	50	63	22	18	33
	ENSMUSG00000039462.4	Col10a1	-1.25527	3.56652	73.6305	5.49787e-09	4.54772e-06	262	273	260	104	86	117
	ENSMUSG00000053475.5	Tnfaip6	-1.23779	3.68481	78.4459	2.98315e-09	2.89204e-06	287	312	263	104	101	132
	ENSMUSG00000074634.12	Tmem267	-1.21663	3.06098	33.8681	3.33052e-05	0.00274673	227	220	111.15	70	74	75
	ENSMUSG00000022066.16	Entpd4b	-1.21168	5.2283	166.114	1.1595e-12	4.94312e-09	901.33	840.68	782.16	296.89	331.27	376.82
	ENSMUSG00000075289.5	Carns1	-1.21039	4.88892	63.5862	9.83838e-06	0.00115972	612.29	642.82	724.59	200.27	276.59	318.95
	ENSMUSG00000042451.12	Mybph	-1.20933	5.49559	129.737	3.50366e-10	5.71416e-07	1120.44	1133.34	796.85	343.28	429.99	440.2
	ENSMUSG00000073940.3	Hbb-bt	-1.20095	4.67375	46.2506	0.000108015	0.00647871	560.09	525.47	617.63	176.06	210.95	301.25
	ENSMUSG00000071005.7	Ccl19	-1.19704	2.41273	38.9393	1.4563e-06	0.000287223	122.6	113.9	111.03	38.25	53.39	48.91
	ENSMUSG00000056569.11	Mpz	-1.17939	6.29338	106.158	1.57056e-07	5.76436e-05	1970	1513	1772	604	684	856
	ENSMUSG00000079654.3	Prrt4	-1.17692	2.09917	29.0418	1.28893e-05	0.00142583	89	109	79	29	46	38
	ENSMUSG00000022483.17	Col2a1	-1.15523	3.03475	45.4975	4.12709e-07	0.000111574	186	176	174	86	59	76
	ENSMUSG00000052305.6	Hbb-bs	-1.14878	7.17951	80.0372	3.40078e-06	0.000517787	3144.91	3068.53	3406.37	1072.94	1323.05	1634.75
	ENSMUSG00000032315.6	Cyp1a1	-1.13575	2.80885	43.7069	5.75179e-07	0.00014607	151	163	141	56	74	61
	ENSMUSG00000111390.1	Gm48796	-1.12492	1.4647	20.2232	0.000132203	0.00749375	55.2	60.84	56.5	25.17	26.28	21.88
	ENSMUSG00000048583.16	Igf2	-1.1216	4.63191	72.5437	1.39981e-07	5.27747e-05	573	477.05	579	196	209.92	287
	ENSMUSG00000072674.10	Plac9b	-1.10504	4.86903	104.295	1.71333e-10	3.27429e-07	695.34	571.62	650.87	235.12	273.97	315.44
	ENSMUSG00000052631.15	Sh2d6	-1.1045	1.66011	22.7336	6.50888e-05	0.00438309	73	65	61	27	31	27
	ENSMUSG00000095463.8	Entpd4	-1.09889	5.40914	146.622	4.58238e-12	1.49388e-08	986.27	943.8	864.24	343.88	426.63	433.29
	ENSMUSG00000043556.10	Fbxl7	-1.09515	2.05422	24.2366	4.33923e-05	0.0032868	79	99	85	27	45	42
	ENSMUSG00000029675.12	Eln	-1.09258	6.8414	126.253	1.49641e-10	2.96187e-07	2526.93	2372	2623	906	1111.9	1252.91
	ENSMUSG00000026822.14	Lcn2	-1.08243	4.427	63.9499	2.20427e-07	7.54093e-05	553	483	374	232	202	174
	ENSMUSG00000042429.8	Adora1	-1.06747	2.78299	36.6641	2.32711e-06	0.000396833	151.56	163.66	125.15	70.72	63.01	58.8
	ENSMUSG00000003665.7	Has1	-1.05743	3.32415	53.7909	9.84766e-08	4.16616e-05	238	212	195	90	100	95
	ENSMUSG00000104213.5	Ighd	-1.04947	2.95272	35.3602	3.06904e-06	0.000479902	221	145	132	68	78	74
	ENSMUSG00000014164.15	Klhl3	-1.03798	2.02001	21.3664	9.52563e-05	0.00584629	76	83	94	36	31	47
	ENSMUSG00000095128.2	Gm5709	-1.01196	1.91894	19.4173	0.000167465	0.00906356	94	86	56	34	42	31
	ENSMUSG00000059022.15	Kcp	-1.00156	2.04328	21.5138	9.13724e-05	0.00566437	94	72	90	33	38	47
	ENSMUSG00000018593.13	Sparc	-0.998703	10.3128	69.1502	4.03412e-07	0.000110135	26579	24933	30105	11168	11766	14987
	ENSMUSG00000079165.10	Sap25	-0.994763	3.54803	36.0145	6.91885e-06	0.000879472	206.67	287.28	245.63	103.01	140.51	99.79
	ENSMUSG00000033579.16	Fa2h	-0.994288	6.53656	152.827	2.91091e-12	1.0957e-08	2121	1947	1904	849	966	950
	ENSMUSG00000022651.6	Retnlg	-0.972462	3.08498	32.7038	5.50011e-06	0.000743738	215	172	149	87	96	67
	ENSMUSG00000025784.5	Clec3b	-0.960539	6.1233	53.0358	3.83192e-05	0.00302951	1591	1557	1307	532	715	869
	ENSMUSG00000042254.14	Cilp	-0.954455	7.81766	72.7428	3.36969e-07	9.96945e-05	5150	4744	4509	1905	2098	2866
	ENSMUSG00000030724.7	Cd19	-0.950268	2.66304	24.2846	4.28431e-05	0.00327957	170	115	111	72	54	61
	ENSMUSG00000029061.2	Mmp23	-0.949119	2.88092	29.4631	1.16514e-05	0.00132322	152	158	149	56	73	91
	ENSMUSG00000040592.11	Cd79b	-0.947241	2.47752	22.7289	6.51742e-05	0.00438352	132	114	100	67	50	47
	ENSMUSG00000016024.9	Lbp	-0.938012	6.56037	106.673	1.35689e-10	2.78519e-07	2275	2125	1620	925	922	1035
	ENSMUSG00000023036.14	Pcdhgc4	-0.937697	4.83892	74.9177	4.65541e-09	4.16141e-06	678.57	635.04	502.08	266.82	333.72	269.68
	ENSMUSG00000029307.7	Dmp1	-0.92784	3.90307	33.4844	2.72704e-05	0.00245748	336	304	299	123	126	207
	ENSMUSG00000012017.4	Scarf2	-0.926096	4.62706	70.9644	7.81454e-09	5.93274e-06	571	495	492	206	284	267
	ENSMUSG00000020357.3	Flt4	-0.921641	5.08291	82.7676	1.76522e-09	1.9312e-06	777	738	626	335	393	311
	ENSMUSG00000078816.9	Prkcg	-0.920639	2.27035	20.9886	0.000106051	0.00640243	118	99	80	41	47	56
	ENSMUSG00000094800.8	Gm9780	-0.91302	3.59743	29.649	3.3917e-05	0.00278889	221.08	257.48	273.3	91.8	123.01	156.03
	ENSMUSG00000036545.9	Adamts2	-0.903088	6.39361	75.3767	1.66597e-07	6.03461e-05	1812	1648	1820	699	895	1024
	ENSMUSG00000104559.1	Gm43118	-0.901439	3.55933	40.7288	1.01932e-06	0.000220671	255.85	246.48	231.48	105.77	144.16	112.04
	ENSMUSG00000041995.8	Zbed3	-0.892426	3.54252	43.0229	6.54464e-07	0.000163383	272	228	224	109	125	125
	ENSMUSG00000029576.17	Radil	-0.887247	2.90569	27.7976	1.74531e-05	0.00181137	179	143	140	63	77	90
	ENSMUSG00000095366.2	Gm21860	-0.878706	2.81062	24.5422	4.00224e-05	0.00312405	146.78	148.5	133.63	57.34	91.45	67.9
	ENSMUSG00000047181.12	Samd14	-0.874711	3.2064	33.8687	4.24435e-06	0.000615674	194	195	179	81	103	102
	ENSMUSG00000020953.17	Coch	-0.874554	8.04356	59.092	1.4673e-06	0.000288367	5688	5002	5781	2494	2474	3348
	ENSMUSG00000028111.4	Ctsk	-0.871246	6.47322	87.466	1.65007e-09	1.8663e-06	1927	1668	1941	975	874	941
	ENSMUSG00000028195.4	Ccn1	-0.865063	5.55903	77.0164	4.87766e-09	4.22382e-06	1165	1013	775	480	476	529
	ENSMUSG00000022440.9	C1qtnf6	-0.843311	4.67198	67.0444	1.33477e-08	9.13263e-06	539	546	489	251	262	296
	ENSMUSG00000037872.5	Ackr1	-0.838547	4.96306	75.3862	4.3843e-09	3.98332e-06	714.68	600.11	613.2	324.95	331.85	334.8
	ENSMUSG00000017969.13	Ptgis	-0.833363	4.33063	53.4577	1.03996e-07	4.33352e-05	456.5	379.13	401.62	203.39	201	236
	ENSMUSG00000030218.2	Mgp	-0.831863	6.31404	71.6695	5.81823e-08	2.76263e-05	1787	1504	1629	706	836	1014
	ENSMUSG00000026837.16	Col5a1	-0.815056	7.79213	63.0327	1.29009e-07	4.99986e-05	4644.95	4545.88	4459.89	1991.97	2273.97	2918.97
	ENSMUSG00000050578.10	Mmp13	-0.814775	7.39564	90.24	7.47721e-10	9.63708e-07	3931	3405	3077	1796	1755	1884
	ENSMUSG00000032125.20	Robo4	-0.813024	4.1832	36.4263	4.1358e-06	0.000604776	448	338	329	175	240	168
	ENSMUSG00000060568.14	Fam78b	-0.811619	3.07317	26.5717	2.37021e-05	0.00222692	174	171	164	73	96	99
	ENSMUSG00000057969.15	Sema3b	-0.808773	3.95734	36.8944	2.21752e-06	0.000388915	329	296	321	131	171	198
	ENSMUSG00000041120.6	Nbl1	-0.806684	6.68452	93.9701	4.97215e-10	7.34518e-07	2381	2106	1857	1003	1170	1164
	ENSMUSG00000017309.11	Cd300lg	-0.802096	3.1192	25.0489	3.50427e-05	0.00285184	165	171	187	78	96	104
	ENSMUSG00000056174.8	Col8a2	-0.794705	3.54652	24.103	6.90729e-05	0.00459262	228	200	276	103	124	150
	ENSMUSG00000031740.8	Mmp2	-0.79278	7.8271	56.2069	5.84243e-07	0.000147179	4632	4433	4818	2020	2476	2941
	ENSMUSG00000027408.7	Cpxm1	-0.783873	4.37788	45.6782	3.99301e-07	0.000109553	428	483	354	216	235	225
	ENSMUSG00000040428.19	Plekha4	-0.782226	4.67444	55.1932	7.84771e-08	3.42463e-05	555	550	451	253	270	310
	ENSMUSG00000072676.12	Tmem254a	-0.78159	3.22697	26.2054	2.60106e-05	0.00237095	189.37	174.25	199.36	96.76	94.58	110.01
	ENSMUSG00000037126.16	Psd	-0.779475	2.86778	19.6531	0.0001562	0.00857103	150.43	171.9	116.4	84.33	70.43	79.54
	ENSMUSG00000024011.17	Pi16	-0.776916	7.2508	39.9131	5.12952e-05	0.00371127	3184.7	3171.35	2938.5	1323.42	1598.43	2103.13
	ENSMUSG00000053198.14	Prx	-0.775704	4.93532	53.5396	1.0261e-07	4.30812e-05	719	580.95	565	274	379	351
	ENSMUSG00000024395.9	Lims2	-0.77278	3.36374	25.363	3.22946e-05	0.00270266	204.97	209	203.91	85	131	119
	ENSMUSG00000020658.10	Efr3b	-0.770357	3.09745	24.5079	4.03863e-05	0.00314803	174	164	174	89	86	102
	ENSMUSG00000030607.7	Acan	-0.768118	3.50098	26.035	2.71661e-05	0.00245207	217	231	231	108	109	152
	ENSMUSG00000022330.5	Osr2	-0.768038	2.91566	21.3764	9.49889e-05	0.00584282	153	164	134	75	74	95
	ENSMUSG00000024206.15	Rfx2	-0.761048	4.8156	46.8449	3.23305e-07	9.68534e-05	665	606	443	277	340	311
	ENSMUSG00000023046.6	Igfbp6	-0.760053	5.20038	60.5979	3.39233e-08	1.91843e-05	855	739	642	348	415	452
	ENSMUSG00000021702.7	Thbs4	-0.74958	8.44125	67.0999	1.32449e-08	9.13263e-06	7083	6798	7154	3473	3844	4261
	ENSMUSG00000039476.13	Prrx2	-0.747913	3.31893	27.0193	2.11775e-05	0.00208658	209	198	189	104	104	119
	ENSMUSG00000023034.7	Nr4a1	-0.747311	5.05123	43.549	1.81308e-06	0.000336063	730	722	556	289	384	430
	ENSMUSG00000034664.13	Itga2b	-0.745914	3.4688	21.0384	0.000130979	0.00744511	276	218	172	142	107	113
	ENSMUSG00000014602.15	Kif1a	-0.745478	2.94303	19.3778	0.000169439	0.00913041	173	149	136	80	101	70
	ENSMUSG00000058297.16	Spock2	-0.74362	3.09796	22.8112	6.37196e-05	0.00434081	175	165	169	78	101	102
	ENSMUSG00000019997.11	Ccn2	-0.741713	7.02702	70.0545	8.83088e-09	6.35605e-06	2899.09	2516.68	2483.21	1246.18	1454.53	1658.93
	ENSMUSG00000013921.15	Clip3	-0.741159	3.36431	21.3458	9.58145e-05	0.00587404	227	176	211	83	128	129
	ENSMUSG00000034675.17	Dbn1	-0.739431	4.1625	41.127	9.42805e-07	0.00021069	377	367	331	173	214	207
	ENSMUSG00000014303.13	Glis2	-0.735349	4.97106	59.6163	3.93445e-08	2.13776e-05	663.58	624.48	599.27	311.34	367.32	368.22
	ENSMUSG00000026043.18	Col3a1	-0.735173	10.4782	47.0915	5.36993e-07	0.000138422	27167	28876	29833.1	14353	14712	18768
	ENSMUSG00000020681.14	Ace	-0.734604	5.99655	71.4817	7.2936e-09	5.69322e-06	1276.7	1218	1342.85	674.62	725	732.84
	ENSMUSG00000036661.14	Dennd3	-0.732214	3.61377	30.8153	8.47144e-06	0.00104197	253	244	233	130	132	143
	ENSMUSG00000032334.10	Loxl1	-0.731205	6.36009	74.6794	4.80024e-09	4.22276e-06	1823	1740	1405	856	990	905
	ENSMUSG00000020312.12	Shc2	-0.724656	3.45623	24.2475	4.32666e-05	0.0032868	238	209	206	95	127	143
	ENSMUSG00000025978.14	Rftn2	-0.723836	3.25093	20.5202	0.00012131	0.00703254	174.9	197.84	189.78	83.51	104.13	127.54
	ENSMUSG00000100975.2	Gm28875	-0.721824	4.77335	41.8209	8.23881e-07	0.000191047	582	615	446	297	339	279
	ENSMUSG00000001555.10	Fkbp10	-0.716685	5.65845	73.6603	5.47663e-09	4.54772e-06	1046.31	1044.79	938.68	542.95	581.46	575.36
	ENSMUSG00000001348.15	Acp5	-0.712511	5.61694	54.2325	9.77645e-08	4.16616e-05	1122.88	885	936.94	593.92	545.93	508.82
	ENSMUSG00000090698.2	Apold1	-0.707807	3.32361	20.972	0.000106554	0.00641548	229	179	185	120	119	94
	ENSMUSG00000092021.8	Gbp11	-0.70242	4.43238	34.2867	3.87236e-06	0.00057338	489.83	445.38	354.54	256.89	258.34	210.94
	ENSMUSG00000076617.9	Ighm	-0.701043	6.52776	57.8338	5.83222e-08	2.76263e-05	2084	1834	1619	1138	1017	964
	ENSMUSG00000039787.13	Cercam	-0.699061	4.19588	29.1426	1.25808e-05	0.0014029	365.67	311.09	406.53	178	211.82	229
	ENSMUSG00000035184.15	Fam124a	-0.69752	3.62859	26.4628	2.4364e-05	0.00226937	250	270	212	123	150	143
	ENSMUSG00000041577.5	Prelp	-0.696865	7.67659	36.6068	3.26577e-05	0.00271287	4235	3704.93	4268	1921	2240	2822
	ENSMUSG00000037379.7	Spon2	-0.69662	4.33808	37.8901	1.80378e-06	0.000335461	402	395	402	203	226	255
	ENSMUSG00000020689.4	Itgb3	-0.695192	5.51543	58.6704	4.54626e-08	2.42267e-05	996	895	840	545	519	485
	ENSMUSG00000033350.7	Chst2	-0.694459	3.45489	24.2106	4.36926e-05	0.0032868	232	209	206	104	138	127
	ENSMUSG00000040732.20	Erg	-0.69409	4.64163	36.41	2.45493e-06	0.00041354	562	510	417	301	298	244
	ENSMUSG00000031503.13	Col4a2	-0.692269	7.55573	60.2874	3.55454e-08	1.96996e-05	4167	3864	3244	2084	2327	1997
	ENSMUSG00000028989.3	Angptl7	-0.691272	7.27119	60.7352	3.32319e-08	1.89871e-05	3516	3183	2566	1579	1837	1857
	ENSMUSG00000067924.4	Rtl8b	-0.690541	4.39894	40.4229	1.08264e-06	0.000230773	455.2	395.65	400.67	220.57	234.83	259.14
	ENSMUSG00000038895.16	Zfp653	-0.690238	3.7243	24.1949	4.3876e-05	0.0032868	298.81	258	226	119	180	148
	ENSMUSG00000086784.2	Isoc2a	-0.688554	4.12939	26.5392	2.76218e-05	0.00247707	364	382	292	226	195	169
	ENSMUSG00000004655.5	Aqp1	-0.687165	8.02389	65.9062	1.56602e-08	1.04567e-05	5368	5328	4836	2859	3072	2958
	ENSMUSG00000031502.11	Col4a1	-0.686421	7.95015	61.453	2.98551e-08	1.7753e-05	5437	5002	4353	2617	3095	2744
	ENSMUSG00000028073.15	Pear1	-0.684086	4.71441	41.5205	8.73242e-07	0.000198281	537.39	555.02	466.24	268.27	341	285
	ENSMUSG00000033191.14	Tie1	-0.683853	5.04866	42.9435	6.64411e-07	0.000165122	686	643	635	377	426	323
	ENSMUSG00000039349.5	C130074G19Rik	-0.683406	5.09821	50.0759	1.83402e-07	6.5156e-05	681	655	693	360	384	424
	ENSMUSG00000029070.9	Mxra8	-0.680915	6.54143	57.7557	5.23644e-08	2.59115e-05	1841.8	1842.71	1845.98	937	1026	1229.51
	ENSMUSG00000024486.6	Hbegf	-0.678301	4.78628	41.9915	7.97191e-07	0.000187208	625	525	489	272	356	315
	ENSMUSG00000019278.5	Dpep1	-0.677139	3.95905	25.4186	3.18328e-05	0.00268735	345	318	257	142	173	215
	ENSMUSG00000010830.8	Kdelr3	-0.674457	3.81397	25.5259	3.09616e-05	0.00265466	275	252	298	152	151	175
	ENSMUSG00000029096.15	Htra3	-0.67327	6.11523	53.2385	1.14298e-07	4.54619e-05	1449	1396	1272	666	772	947
	ENSMUSG00000037095.8	Lrg1	-0.672954	4.15164	25.4891	3.71638e-05	0.00297505	445	313	296	219	200	185
	ENSMUSG00000026564.9	Dusp27	-0.672364	4.78284	33.7402	6.38455e-06	0.000827938	581	611	441	259	364	321
	ENSMUSG00000027318.17	Adam33	-0.671782	4.70619	33.0493	6.49152e-06	0.000836667	515	491	533	233	315	348
	ENSMUSG00000001119.7	Col6a1	-0.670249	8.1923	47.6418	2.80449e-07	8.73283e-05	5913	5887	5562	2822	3273	4002
	ENSMUSG00000045672.15	Col27a1	-0.668222	4.31354	34.3236	3.8413e-06	0.000570747	384	405	381	212	215	253
	ENSMUSG00000024247.14	Pkdcc	-0.668014	3.55343	21.6407	8.81673e-05	0.005488	264	198	227	113	135	152
	ENSMUSG00000060470.7	Adgrg3	-0.66713	3.8451	25.2718	3.30677e-05	0.00273122	338	251	258	154	184	152
	ENSMUSG00000038217.13	Tlcd2	-0.665841	3.59043	22.554	6.83833e-05	0.00456061	229.07	230.14	245	116.04	140	155.1
	ENSMUSG00000006386.15	Tek	-0.665768	4.9845	31.9886	2.03947e-05	0.00202562	588	575	697	339	336	412
	ENSMUSG00000032997.16	Chpf	-0.663171	4.40636	36.5865	2.36535e-06	0.000402117	478	397	377	243	238	245
	ENSMUSG00000094686.1	Ccl21a	-0.662954	6.56454	36.9284	2.6984e-05	0.00243961	2078.4	1739.65	1792.68	1157.16	1192.71	903.64
	ENSMUSG00000022548.14	Apod	-0.655457	8.94016	46.1905	3.63788e-07	0.000103166	10665	10107	8386	4879	5628	6551
	ENSMUSG00000045333.15	Zfp423	-0.654326	3.3129	19.2649	0.000175215	0.00938372	213	190	177	91	120	129
	ENSMUSG00000020241.13	Col6a2	-0.653725	7.88734	46.8481	3.2312e-07	9.68534e-05	4877	4686	4437	2359	2590	3276
	ENSMUSG00000024304.14	Cdh2	-0.652819	3.29275	19.9617	0.000142675	0.00801657	201	192	178	98	110	127
	ENSMUSG00000004098.7	Col5a3	-0.652288	6.45592	51.9884	1.32652e-07	5.10533e-05	1824	1845	1523	836	1074	1140
	ENSMUSG00000028776.14	Tinagl1	-0.652014	4.843	37.628	1.90391e-06	0.000345956	618	540	532	302	389	300
	ENSMUSG00000015085.8	Entpd2	-0.649933	4.2018	30.2703	9.62333e-06	0.00114204	377.02	347.1	354	179	213.91	242
	ENSMUSG00000018819.10	Lsp1	-0.648465	7.88202	40.8217	2.5183e-06	0.000420382	4842	4863	4235	2769	3103	2306
	ENSMUSG00000026921.19	Egfl7	-0.648461	5.84203	39.987	5.80978e-06	0.000768458	1280	1174	940	711	692	579
	ENSMUSG00000027380.10	Acoxl	-0.643137	3.7727	24.2165	4.36248e-05	0.0032868	259	257	279	143	165	163
	ENSMUSG00000071637.5	Cebpd	-0.64205	3.91738	26.0886	2.67965e-05	0.00242662	328.36	310.33	247.48	164.25	189.67	167.41
	ENSMUSG00000034520.14	Gjc1	-0.641842	3.4296	19.6659	0.00015561	0.00854714	228	220	180	117	141	112
	ENSMUSG00000030116.14	Mfap5	-0.639514	5.51062	46.1744	3.64854e-07	0.000103166	905	865	903	457	524	607
	ENSMUSG00000034463.4	Scara3	-0.635024	6.71495	51.1112	1.53742e-07	5.71848e-05	2177	1933	2060	1061	1217	1396
	ENSMUSG00000051331.15	Cacna1c	-0.632478	3.73173	21.2548	9.83165e-05	0.0060075	236	272	262	136	149	175
	ENSMUSG00000056427.10	Slit3	-0.631106	5.18731	36.882	2.32024e-06	0.000396833	711	677	740	343	469	462
	ENSMUSG00000029718.14	Pcolce	-0.63097	7.42638	53.0771	1.10714e-07	4.47873e-05	3706	3342	3078	1770	2008	2250
	ENSMUSG00000022555.12	Dgat1	-0.629608	5.42882	41.3455	9.03461e-07	0.000203539	921	882	727	451	590	464
	ENSMUSG00000032548.14	Slco2a1	-0.628843	6.62402	33.712	3.93342e-05	0.00308336	2175	2029	1608	1151	1314	981
	ENSMUSG00000055799.13	Tcf7l1	-0.627474	3.95414	22.3373	7.25976e-05	0.00473902	356	266	282	153	172	214
	ENSMUSG00000020363.6	Gfpt2	-0.623573	5.78654	57.3053	5.61713e-08	2.70702e-05	1166	1082	987	584	667	684
	ENSMUSG00000021867.16	Tmem254b	-0.623332	5.50289	40.4036	1.12294e-06	0.000236633	941.67	936.7	778.39	444.76	627.86	518.12
	ENSMUSG00000038729.24	Pakap	-0.621679	6.21534	39.1542	5.5053e-06	0.000743738	1617	1588	1163.82	863.5	951.35	788.05
	ENSMUSG00000039911.13	Spsb1	-0.620944	4.81184	38.0916	1.73067e-06	0.000325137	619	560	465	310	328	344
	ENSMUSG00000018217.12	Pmp22	-0.62084	7.3426	44.891	4.61367e-07	0.00012061	3395	2974	3137	1679	1806	2227
	ENSMUSG00000097328.7	Tnfsf12	-0.618191	4.52375	28.3394	1.52809e-05	0.00161928	468.25	484.08	389.21	285.78	282.63	232.66
	ENSMUSG00000020027.18	Socs2	-0.615785	4.532	32.0277	6.40886e-06	0.000827938	496.77	419	431.2	281.3	253	273.75
	ENSMUSG00000032714.6	Syde1	-0.615766	4.48724	32.6431	5.57567e-06	0.000747491	505	422	382	243	278	264
	ENSMUSG00000000223.13	Drp2	-0.615662	5.11395	31.7298	1.16794e-05	0.00132369	766	606	650	322	422	475
	ENSMUSG00000039883.5	Lrrc17	-0.615562	4.04037	25.3768	3.21795e-05	0.00270215	311	312	329	171	195	209
	ENSMUSG00000023018.5	Smarcd1	-0.614456	5.1425	37.9274	1.79e-06	0.000334019	787.92	697.97	580.9	416	442.95	378.92
	ENSMUSG00000063171.4	Rps4l	-0.613932	3.82531	21.6611	8.76619e-05	0.00547107	309	253	260	161	186.97	146
	ENSMUSG00000018339.11	Gpx3	-0.61286	7.82082	38.4831	2.55205e-06	0.000424478	4977	4435	3855	2182	2664	3153
	ENSMUSG00000028978.12	Nos3	-0.612621	4.46374	26.2869	2.54764e-05	0.00233377	492.62	446.82	348.17	241.86	299.96	231.37
	ENSMUSG00000020788.15	Atp2a3	-0.611817	5.87546	40.114	2.24201e-06	0.000390677	1205	1226	1000	741	714	605
	ENSMUSG00000057098.14	Ebf1	-0.61101	4.91128	37.5909	1.91858e-06	0.000347483	583	570	594	332	343	382
	ENSMUSG00000067818.6	Myl9	-0.606519	4.37895	20.9406	0.00019116	0.00990119	430	358	417	208	217	307
	ENSMUSG00000039706.11	Ldb2	-0.606019	3.66618	19.1279	0.000182513	0.00963339	249	225	257	136	137	171
	ENSMUSG00000079018.10	Ly6c1	-0.605719	8.51523	46.0307	3.74487e-07	0.000104397	7946.05	7378.16	6110.79	4253.37	4382.53	4293.18
	ENSMUSG00000022836.11	Mylk	-0.604214	5.73834	42.5471	7.16549e-07	0.000174175	1027.63	1002.76	1067.72	548.85	621.84	716.67
	ENSMUSG00000027230.9	Creb3l1	-0.602687	4.43762	28.9603	1.31449e-05	0.0014512	428	409	417	213	270	281
	ENSMUSG00000034911.8	Ushbp1	-0.602509	4.01977	23.7204	4.98012e-05	0.00362625	303	310	322	168	191	211
	ENSMUSG00000026811.18	St6galnac6	-0.602424	4.45251	28.122	1.61153e-05	0.00169474	432	414	421	217	256	299
	ENSMUSG00000044345.9	Marveld1	-0.60183	6.91775	53.1327	1.09705e-07	4.47057e-05	2595	2305	2158	1273	1492	1521
	ENSMUSG00000027848.12	Olfml3	-0.601567	6.78761	56.6582	6.21734e-08	2.87143e-05	2282	2150	2008	1243	1354	1313
	ENSMUSG00000020642.13	Rnf144a	-0.599943	3.71048	19.8957	0.000145454	0.00812619	280	249	227	159	134	165
	ENSMUSG00000041378.2	Cldn5	-0.599642	3.77736	20.2954	0.000129461	0.00736636	319	246	229	166	157	157
	ENSMUSG00000001240.13	Ramp2	-0.599469	4.64293	35.0192	3.30272e-06	0.000505635	520.14	460.92	467	275.07	301	304.64
	ENSMUSG00000047867.11	Gimap6	-0.59904	5.50408	28.953	5.97822e-05	0.0041623	988	914	744	573	579	448
	ENSMUSG00000040663.9	Clcf1	-0.597674	5.00385	31.3893	7.41747e-06	0.000936409	716	639	514	380	417	335
	ENSMUSG00000056481.7	Cd248	-0.596201	6.10074	49.5018	2.02466e-07	7.05716e-05	1420	1300	1270	710	813	914
	ENSMUSG00000004562.16	Arhgef40	-0.594953	5.50182	43.8914	5.55611e-07	0.000142558	890.06	854.47	881.03	478.62	538.07	590.34
	ENSMUSG00000036862.15	Dchs1	-0.594337	4.11772	24.7525	3.78679e-05	0.00301102	348	320.96	332	172	221.91	218.93
	ENSMUSG00000026478.14	Lamc1	-0.594217	7.91718	50.114	1.82209e-07	6.51499e-05	4919	4672	4472	2631	2971	2994
	ENSMUSG00000014846.12	Tppp3	-0.593805	7.10155	29.429	7.36328e-05	0.00478406	2938	3030	2058	1689	1626	1552
	ENSMUSG00000045193.13	Cirbp	-0.593507	6.28557	41.9261	8.76544e-07	0.000198281	1817	1526	1217	848	988	935
	ENSMUSG00000030470.15	Csrp3	-0.593122	7.58917	32.3066	2.08247e-05	0.00206463	4358	3967	2942	1916	2464	2484
	ENSMUSG00000038463.8	Olfml2b	-0.593032	5.99485	43.6882	5.77205e-07	0.00014607	1236	1188	1269	703	710	851
	ENSMUSG00000108022.1	Gm7298	-0.591816	5.79249	41.0504	9.57027e-07	0.000212158	1076.98	1184.99	955	634	730	602
	ENSMUSG00000032232.14	Cgnl1	-0.591665	6.63077	46.3499	3.53447e-07	0.000102023	1953	1977	1823	1006	1193	1331
	ENSMUSG00000038587.9	Akap12	-0.590229	4.83619	31.3142	7.54689e-06	0.00094628	560	578	514	287	332	395
	ENSMUSG00000035783.9	Acta2	-0.589575	5.94598	48.7169	2.32068e-07	7.79482e-05	1251	1115	1205	687	724	780
	ENSMUSG00000079013.2	Serpina3j	-0.589233	7.90455	48.0493	2.60937e-07	8.31114e-05	4691	4712	4502	2646	2989	2901
	ENSMUSG00000052974.8	Cyp2f2	-0.586773	4.91958	35.3395	3.08268e-06	0.000479902	618.94	594.87	536.77	322.86	346.9	404.95
	ENSMUSG00000032492.14	Pth1r	-0.585234	4.0694	20.309	0.000128951	0.00734492	342	328	297	149	218	229
	ENSMUSG00000066113.16	Adamtsl1	-0.585023	4.17589	23.2678	5.6267e-05	0.00397752	360	320	359	179	237	225
	ENSMUSG00000037406.7	Htra4	-0.584732	5.33348	35.9525	2.70448e-06	0.000444203	891	691.94	752.75	419	540.45	476.66
	ENSMUSG00000038884.14	Shfl	-0.584442	4.95621	32.4336	5.84538e-06	0.000769493	618.49	659.52	517.86	372.32	388.06	341.29
	ENSMUSG00000026825.17	Dnm1	-0.583967	5.90391	31.1438	3.60564e-05	0.0029172	1183	1121	1158	557	743	841
	ENSMUSG00000028339.17	Col15a1	-0.583579	5.49905	35.82	2.78174e-06	0.000449466	869	785	952	500	569	541
	ENSMUSG00000023991.16	Foxp4	-0.583491	5.57618	37.6735	1.8861e-06	0.000343848	1106	879	789	526	632	541
	ENSMUSG00000022220.14	Adcy4	-0.583326	4.50721	21.7377	0.000124398	0.00715175	482	427	404	278	313	214
	ENSMUSG00000023411.12	Nfatc4	-0.583306	4.83626	32.2596	6.08009e-06	0.000796606	588	522	539	287	351	379
	ENSMUSG00000032946.16	Rasgrp2	-0.582846	4.17778	24.4687	4.08064e-05	0.00317208	370	363.29	310	201	242	198
	ENSMUSG00000071076.6	Jund	-0.581181	6.22834	40.1547	1.19861e-06	0.000247866	1545.1	1581.84	1225.09	749.14	936.22	996.79
	ENSMUSG00000017446.14	C1qtnf1	-0.580881	4.73439	22.132	0.000157562	0.00863725	552.5	476.25	506.16	272.73	276.05	399.06
	ENSMUSG00000034845.6	Plvap	-0.580326	6.51356	31.7031	3.23862e-05	0.00270266	2083	1696	1534	1158	1153	941
	ENSMUSG00000002233.13	Rhoc	-0.579656	5.66269	38.575	1.56798e-06	0.000301732	1121	987	832	619	635	549
	ENSMUSG00000020902.12	Ntn1	-0.578015	6.87609	42.7176	6.93603e-07	0.000169706	2486	2357	1975	1191	1453	1566
	ENSMUSG00000020473.13	Aebp1	-0.576804	7.17093	46.5358	3.41783e-07	9.96945e-05	2984	2887	2484	1644	1860	1650
	ENSMUSG00000072680.11	Tmem254c	-0.575658	5.70856	26.8131	0.00011719	0.00685828	1185.96	888.04	954.24	526.49	595.57	750.87
	ENSMUSG00000017466.9	Timp2	-0.572932	8.33851	29.9678	2.33887e-05	0.00221956	6364	5839	6475	3244	3763	4635
	ENSMUSG00000036564.17	Ndrg4	-0.570861	4.55295	24.8093	3.73083e-05	0.00297505	452	416	477	268	254	315
	ENSMUSG00000021903.11	Galnt15	-0.57007	6.29702	30.4863	4.30385e-05	0.0032868	1721	1589	1249	780	935	1112
	ENSMUSG00000066278.6	Vps37b	-0.568091	4.79964	23.7653	7.11487e-05	0.0046775	606.73	587.45	414.8	334.68	361.19	298.23
	ENSMUSG00000018868.4	Pnpla5	-0.565439	5.09219	32.9322	5.22536e-06	0.000715048	692	670	601	367	472	384
	ENSMUSG00000045092.8	S1pr1	-0.563886	5.44814	35.1005	3.24534e-06	0.000499765	988	824	711	543	512	508
	ENSMUSG00000038668.14	Lpar1	-0.562848	5.69681	35.0991	3.24634e-06	0.000499765	1029	1058	900	533	595	739
	ENSMUSG00000031431.13	Tsc22d3	-0.562451	6.87092	43.5043	5.97526e-07	0.000149844	2535	2061	2159	1273	1422	1521
	ENSMUSG00000035279.8	Ssc5d	-0.562184	5.36746	29.4097	1.90576e-05	0.00192735	818	771	782	411	472	603
	ENSMUSG00000027397.14	Slc20a1	-0.561886	6.31365	46.5637	3.40069e-07	9.96945e-05	1593.67	1596.55	1393.43	912.96	1032.76	914.37
	ENSMUSG00000033174.17	Mgll	-0.561789	7.93435	41.7832	8.299e-07	0.000191641	4901	4766	4438	2591	3234	3000
	ENSMUSG00000019539.11	Rcn3	-0.561593	5.15487	35.3157	3.0985e-06	0.000481013	693	662	688	380	439	461
	ENSMUSG00000031070.15	Mrgprf	-0.561038	3.77763	18.9937	0.000189984	0.00987598	257	264	260	153	157	179
	ENSMUSG00000031486.15	Adgra2	-0.560571	6.15549	31.5263	2.23113e-05	0.00215421	1494	1493	1130	870	937	753
	ENSMUSG00000026814.16	Eng	-0.558312	6.62349	27.0818	0.000109652	0.00656265	2067	1907	1711	1273	1289	979
	ENSMUSG00000037221.13	Mospd3	-0.558143	4.48537	26.5433	2.38727e-05	0.00223866	492	410	384	250	293	260
	ENSMUSG00000072941.5	Sod3	-0.557613	7.15124	29.6612	3.38003e-05	0.00278343	3153	2998	2084	1676	1665	1781
	ENSMUSG00000021904.6	Sema3g	-0.557321	4.78657	27.8054	1.74195e-05	0.00181127	577	541	467	324	371	295
	ENSMUSG00000022623.17	Shank3	-0.556992	4.9495	31.1522	7.83457e-06	0.000973542	627.86	579.85	563.64	336.27	423.67	351.43
	ENSMUSG00000067925.4	Rtl8a	-0.556554	4.30516	21.2388	9.87648e-05	0.00602825	424.8	406.35	304.33	198.43	249.17	262.86
	ENSMUSG00000051043.16	Gprc5c	-0.553901	4.15587	21.9212	8.15018e-05	0.00519078	360	339	319	185	208	247
	ENSMUSG00000028517.8	Plpp3	-0.552893	7.60894	42.4935	7.23932e-07	0.000175201	3974	3875	3392	2156	2338	2568
	ENSMUSG00000014329.14	Bicc1	-0.552018	5.89255	26.2853	0.000118693	0.0069316	1197.79	1114.77	1096.34	611.81	645.79	890.52
	ENSMUSG00000056025.12	Clca3a1	-0.552013	4.36311	23.9982	4.62335e-05	0.00343013	462.41	358.57	358.34	232.88	263.6	241.84
	ENSMUSG00000089715.12	Cbx6	-0.551811	5.37784	35.7911	2.79894e-06	0.00045093	862	762	761	446.97	483	571
	ENSMUSG00000021943.7	Gdf10	-0.551493	5.28087	24.622	9.75288e-05	0.00596594	833	705	694	364	476	567
	ENSMUSG00000027074.14	Slc43a3	-0.551104	5.60447	41.6125	8.57796e-07	0.000195638	949	965	875	560	622	573
	ENSMUSG00000074207.10	Adh1	-0.549859	4.84207	27.7606	1.7613e-05	0.00181775	584.99	602	457.98	314	338	382
	ENSMUSG00000031538.6	Plat	-0.549383	5.31288	38.8088	1.4953e-06	0.00029283	791	790	697	442	490	503
	ENSMUSG00000050910.5	Cdr2l	-0.548293	4.47996	26.343	2.51161e-05	0.00231607	453	447	376	254	288	261
	ENSMUSG00000002504.15	Slc9a3r2	-0.547248	4.12685	19.9099	0.000144853	0.00810782	353	354	290	178	245	206
	ENSMUSG00000046768.13	Rhoj	-0.545815	4.88814	31.4981	7.23401e-06	0.000917428	626	530	538	346	370	352
	ENSMUSG00000007603.9	Dus3l	-0.54468	5.4659	36.9335	2.19948e-06	0.000386976	919	877	739	510	580	508
	ENSMUSG00000002020.15	Ltbp2	-0.54295	5.70422	32.9377	5.2189e-06	0.000715048	1085.26	1027.27	877.51	662.64	669.31	551.41
	ENSMUSG00000014599.10	Csf1	-0.542547	7.67902	25.0663	0.000123061	0.00711012	4411	4184	3210	2515	2775	2135
	ENSMUSG00000023224.12	Serping1	-0.540976	9.2701	36.6774	2.32063e-06	0.000396833	12950	12055	10488	6949	7506	7995
	ENSMUSG00000017493.12	Igfbp4	-0.540849	7.70157	36.4293	2.44496e-06	0.000413116	4404	3908	3643	2343	2348	2875
	ENSMUSG00000073599.10	Ecscr	-0.540386	4.50963	22.0611	7.83824e-05	0.00502945	472	440	388	298	284	238
	ENSMUSG00000005338.13	Cadm3	-0.540237	5.72854	28.877	2.8067e-05	0.0024966	1073.32	1030.89	930.8	516.05	636.15	777.2
	ENSMUSG00000006576.16	Slc4a3	-0.540145	4.81813	27.6827	1.79551e-05	0.00183258	580	571	462	294	359	369
	ENSMUSG00000020176.17	Grb10	-0.538086	5.86827	31.507	1.10141e-05	0.0012638	1107	1039	1182	618	695	811
	ENSMUSG00000049804.9	Armcx4	-0.535946	4.18891	21.1408	0.000101552	0.00619003	356	355	325	188	224	248
	ENSMUSG00000024620.11	Pdgfrb	-0.535873	6.19023	42.3458	7.447e-07	0.000177133	1482	1449	1249	786	951	921
	ENSMUSG00000020810.5	Cygb	-0.535128	5.36554	24.0339	0.000110112	0.00658309	849.93	773.9	730.62	396.93	488	616.9
	ENSMUSG00000061981.14	Flot2	-0.535058	6.10167	26.0502	0.000106614	0.00641548	1453	1389	1096	848	933	711
	ENSMUSG00000024909.15	Efemp2	-0.533893	5.18104	26.671	2.31149e-05	0.00220023	761	771	545	428	468.73	418.72
	ENSMUSG00000015850.11	Adamtsl4	-0.532797	5.41153	35.0494	3.28131e-06	0.000503749	862	813	754	441	550	559
	ENSMUSG00000020773.11	Trim47	-0.530079	5.43568	33.2782	4.83702e-06	0.000678664	915	832	726	449	582	547
	ENSMUSG00000041734.15	Kirrel	-0.529386	6.36962	41.0568	9.55831e-07	0.000212158	1649	1674	1402	919	1003	1095
	ENSMUSG00000063019.5	Manbal	-0.529332	4.60528	23.1855	5.75374e-05	0.00403133	517	487	384	283	326	274
	ENSMUSG00000001946.14	Esam	-0.528085	4.67145	23.6258	5.10833e-05	0.00370435	535	468	447	314	339	271
	ENSMUSG00000021253.7	Tgfb3	-0.527801	5.02903	27.7161	1.78075e-05	0.00182528	631	595.97	626.99	340	403	446.87
	ENSMUSG00000025555.14	Farp1	-0.527545	5.12393	33.0424	5.09818e-06	0.000706894	701	682	603	384	437	449
	ENSMUSG00000028214.13	Gem	-0.527262	3.99008	19.1665	0.000180422	0.0095686	335	309	258	185	201	189
	ENSMUSG00000006585.3	Cdt1	-0.526981	4.70643	26.6117	2.3464e-05	0.00221964	520	509	455	311	340	297
	ENSMUSG00000006360.11	Crip1	-0.525762	7.65618	37.1988	2.08109e-06	0.000369667	3908	3886	3707	2318	2689	2366
	ENSMUSG00000025854.15	Fam20c	-0.525259	4.02208	19.0838	0.000184929	0.00971466	323	298	298	183	186	220
	ENSMUSG00000029163.9	Emilin1	-0.524236	5.47716	35.6355	2.89336e-06	0.000460089	928	861	751	521	581	522
	ENSMUSG00000080268.4	Brms1	-0.523427	4.94241	24.4432	4.10825e-05	0.00318884	624.12	637.72	488.94	353.3	425.45	341.85
	ENSMUSG00000047907.11	Tshz2	-0.52242	4.91063	23.508	5.273e-05	0.00379507	601	565	542	286	420	394
	ENSMUSG00000023191.9	P3h3	-0.521787	4.50688	22.2252	7.48883e-05	0.00485425	419	409	456	266	276	285
	ENSMUSG00000001918.17	Slc1a5	-0.520734	6.54983	40.8221	1.0008e-06	0.000218368	1888	1770	1679	1032	1251	1149
	ENSMUSG00000022816.11	Fstl1	-0.520377	9.12633	32.0478	6.37974e-06	0.000827938	10635	10804	10372	6447	6508	7530
	ENSMUSG00000020717.19	Pecam1	-0.518622	6.88787	37.3821	2.00333e-06	0.000360476	2319	2201	2214	1442	1527	1364
	ENSMUSG00000043903.4	Zfp469	-0.518074	4.01408	19.0182	0.000188592	0.00986036	317	302	293	173	204	211
	ENSMUSG00000032135.15	Mcam	-0.518047	6.04545	32.5	5.75849e-06	0.000763496	1381	1250	1132	826	880	707
	ENSMUSG00000056749.7	Nfil3	-0.517426	4.93662	22.7654	6.45254e-05	0.00436495	642	629	472	371	413	333
	ENSMUSG00000023495.13	Pcbp4	-0.517153	4.52875	19.7871	0.000150163	0.00833889	495	422	393	228	336	280
	ENSMUSG00000022091.6	Sorbs3	-0.516814	5.15198	26.1813	2.61707e-05	0.00237771	699	682	636	346	477	481
	ENSMUSG00000067586.4	S1pr3	-0.516752	4.99815	25.7668	2.90983e-05	0.00255168	688	619	512	333	435	402
	ENSMUSG00000045411.16	2410002F23Rik	-0.515318	6.50749	40.0986	1.15444e-06	0.000240528	1859.94	1750	1569.93	994	1140.65	1206.16
	ENSMUSG00000026042.16	Col5a2	-0.514386	8.45617	29.278	1.21787e-05	0.00136908	6569	6738	6632	4065	3937	4901
	ENSMUSG00000044017.16	Adgrd1	-0.51404	5.52312	28.4951	1.47121e-05	0.00158322	940	931	745	484	548	656
	ENSMUSG00000038740.9	Mvb12b	-0.51317	4.71339	25.7825	2.89816e-05	0.00254546	540	464	481	301	316	342
	ENSMUSG00000038296.14	Galnt18	-0.511369	4.48358	23.3946	5.43697e-05	0.00388302	466	430	371	265	270	282
	ENSMUSG00000024420.9	Zfp521	-0.511202	4.64545	23.0087	6.03732e-05	0.00417403	456	475	480	293	292	330
	ENSMUSG00000033209.17	Ttc28	-0.510777	4.69363	20.7884	0.000112303	0.00664949	467	480	511	264	327	358
	ENSMUSG00000036052.14	Dnajb5	-0.510639	5.23405	25.2847	3.29571e-05	0.00272614	765	778	595	386	472	525
	ENSMUSG00000032194.9	Kank2	-0.508755	6.31232	38.9503	1.45307e-06	0.000287223	1561	1609	1343	900	1018	1005
	ENSMUSG00000030527.15	Crtc3	-0.508731	5.62033	30.1636	9.86804e-06	0.00115972	1043	978	777	571	668	567
	ENSMUSG00000037060.3	Cavin3	-0.508665	5.81717	38.618	1.55434e-06	0.000300149	1166.52	1053.75	979.6	653.72	733.33	683.78
	ENSMUSG00000039153.17	Runx2	-0.506997	4.81873	25.6863	2.97071e-05	0.00259426	552.13	511.55	528.94	335.22	328.79	369.69
	ENSMUSG00000029207.16	Apbb2	-0.506977	4.71441	22.3269	7.28066e-05	0.0047415	490	496	494	274	322	368
	ENSMUSG00000032470.17	Mras	-0.506058	4.27686	19.0935	0.000184394	0.009711	388	343	361	211	227	272
	ENSMUSG00000016494.9	Cd34	-0.505711	7.74863	27.2528	2.26883e-05	0.00217169	4126.75	4041.77	4016.67	2334.84	2437.91	3166.82
	ENSMUSG00000027204.13	Fbn1	-0.505095	9.10452	30.559	8.9934e-06	0.00109064	10406.4	10889.7	9917.08	6518.93	6446	7327.75
	ENSMUSG00000048332.13	Lhfp	-0.504717	5.3414	27.7025	1.78677e-05	0.00182702	788.93	734	766.97	473	451.97	564.99
	ENSMUSG00000030303.15	Far2	-0.503403	7.72463	36.6876	2.31569e-06	0.000396833	4216.75	3935.07	3841.81	2426.09	2718.18	2661.2
	ENSMUSG00000058070.14	Eml1	-0.503145	4.9854	21.8061	8.41673e-05	0.00530072	558.89	580.96	640.89	333.98	398	433.82
	ENSMUSG00000073423.10	Zfp414	-0.502701	4.73056	24.194	4.38864e-05	0.0032868	527	513	459	300	364	311
	ENSMUSG00000003420.8	Fcgrt	-0.501915	5.43043	30.1813	9.82686e-06	0.00115972	828	830	778	518	486	582
	ENSMUSG00000005397.8	Nid1	-0.501072	7.50299	36.3831	2.46888e-06	0.00041417	3576.96	3365.99	3329.99	2110.99	2226	2359.99
	ENSMUSG00000030410.16	Dmwd	-0.501031	4.66259	22.5817	6.78637e-05	0.00453141	538	474	420	265	329	338
	ENSMUSG00000019846.11	Lama4	-0.500835	6.46908	37.3205	2.0291e-06	0.000362757	1672	1660	1673	1015	1134	1120
	ENSMUSG00000034205.16	Loxl2	-0.497734	6.85756	28.8586	1.37312e-05	0.00150692	2183.8	2365.58	2009.75	1265.77	1348.73	1676.69
	ENSMUSG00000024538.8	Ppic	-0.497613	5.72109	30.1011	1.00145e-05	0.00116599	990	956	1026	587	634	727
	ENSMUSG00000013419.7	Zfp651	-0.497331	5.17263	21.2598	0.000137608	0.00776615	726	668	642	363	422	548
	ENSMUSG00000022098.10	Bmp1	-0.497327	7.15568	33.9467	4.17208e-06	0.000608476	2764	2811	2495	1531	1843	1907
	ENSMUSG00000038271.17	Iffo1	-0.495391	5.03179	22.6406	6.67721e-05	0.00448012	589	641	609	419	423	361
	ENSMUSG00000031565.18	Fgfr1	-0.494921	7.52406	33.0269	5.11582e-06	0.000707041	3706.88	3519	3197	2005	2281	2537.99
	ENSMUSG00000036748.16	Cuedc2	-0.494427	4.66728	22.964	6.1113e-05	0.00420216	522.3	456.32	453.49	320.11	313.75	300.32
	ENSMUSG00000028655.11	Mfsd2a	-0.493516	5.16385	22.1695	8.18306e-05	0.00519644	810	676	546	374	463	489
	ENSMUSG00000031558.15	Slit2	-0.493161	4.46982	22.0764	7.805e-05	0.00502393	450	416	381	268	270	277
	ENSMUSG00000070867.4	Trabd2b	-0.493153	5.01861	26.5708	2.37073e-05	0.00222692	631	644	552	361	400	436
	ENSMUSG00000002059.18	Rab34	-0.491868	4.49049	19.9069	0.000144978	0.00810782	439	442	383	230	301	299
	ENSMUSG00000031849.9	Comp	-0.491215	7.16234	25.3773	4.97413e-05	0.00362625	2885	2568	2638	1533	1644	2143
	ENSMUSG00000055013.16	Agap1	-0.491059	5.18316	22.4014	7.30327e-05	0.00475064	730	684	634	370	431	545
	ENSMUSG00000028967.10	Errfi1	-0.490981	6.92683	33.2017	4.92012e-06	0.000686847	2672	2259	1971	1401	1555	1554
	ENSMUSG00000032014.6	Oaf	-0.490347	4.38861	19.1241	0.000182722	0.00963525	401	415	360	268	263	239
	ENSMUSG00000054641.10	Mmrn1	-0.489801	4.78871	20.821	0.000111258	0.00663016	512	490	547	355	332	331
	ENSMUSG00000030782.16	Tgfb1i1	-0.488466	4.82609	22.2405	7.45707e-05	0.00483933	557	558	481	296	398	356
	ENSMUSG00000032085.5	Tagln	-0.486811	5.17378	25.4534	3.15476e-05	0.00267339	732.74	625.62	671.38	404.16	429.82	502.58
	ENSMUSG00000024299.17	Adamts10	-0.486364	5.68925	28.398	1.50643e-05	0.00160863	896	1023	976	604	644	664
	ENSMUSG00000000876.11	Pxmp4	-0.485356	5.48736	29.4441	1.17043e-05	0.0013238	915	824	788	473	599	594
	ENSMUSG00000036256.13	Igfbp7	-0.48259	7.30916	31.96	6.50847e-06	0.000836905	3038	2877	3006	1813	1972	2117
	ENSMUSG00000033294.11	Noc4l	-0.481667	5.49648	25.3531	3.23774e-05	0.00270266	952	899	697	534	619	522
	ENSMUSG00000023885.9	Thbs2	-0.480853	7.18327	30.1281	9.95079e-06	0.00116102	2756	2673	2741	1641	1751	2022
	ENSMUSG00000041607.17	Mbp	-0.479323	6.56671	32.5927	5.63932e-06	0.000753101	1979	1640	1720	1058	1201	1273
	ENSMUSG00000028469.15	Npr2	-0.478886	5.19158	20.3633	0.000158524	0.0086814	688	652	706	381.5	435	543.14
	ENSMUSG00000040414.8	Slc25a28	-0.47765	6.61555	26.9541	2.22231e-05	0.00214944	2010	2002	1523	1160	1361	1130
	ENSMUSG00000002833.11	Hdgfl2	-0.477435	5.90613	31.2795	7.60756e-06	0.000949591	1251	1140	988	653	816	766
	ENSMUSG00000036995.7	Asap3	-0.476789	4.98144	21.9298	8.13057e-05	0.00518532	641	639	496	341	434	400
	ENSMUSG00000038754.5	Elovl3	-0.476639	4.9759	23.2236	5.69457e-05	0.00399999	604	596	563	334	398	439
	ENSMUSG00000039994.15	Timeless	-0.475968	5.0155	22.5174	6.90755e-05	0.00459262	707	572	540	387	440	374
	ENSMUSG00000056492.6	Adgrf5	-0.475644	6.13231	29.6586	1.11208e-05	0.0012734	1346	1216	1369	876	862	871
	ENSMUSG00000018042.18	Cyb5r3	-0.473991	7.78192	31.3506	7.48385e-06	0.000940859	4373.9	4223	3791	2461	2940.87	2824
	ENSMUSG00000028677.19	Rnf220	-0.473815	5.94893	27.9777	1.6696e-05	0.00174258	1353	1127	1002	739	847	715
	ENSMUSG00000043822.18	Adamtsl5	-0.47325	4.90397	22.5048	6.93164e-05	0.0045952	575	543	556	322	384	409
	ENSMUSG00000029659.16	Medag	-0.472929	5.5926	28.3297	1.53171e-05	0.00162002	938	930.3	839.44	520.54	604.14	675.72
	ENSMUSG00000028641.16	P3h1	-0.47279	4.60638	20.0997	0.00013704	0.00774198	517	430	418	265	329	312
	ENSMUSG00000015094.16	Npdc1	-0.472273	5.16327	24.2035	4.37755e-05	0.0032868	693.98	662.9	649	374	487.09	476
	ENSMUSG00000040488.17	Ltbp4	-0.471202	7.59098	23.6501	6.02997e-05	0.00417403	4068	3417	3369	1916	2599	2718
	ENSMUSG00000022617.15	Chkb	-0.468076	5.76165	31.8699	6.64362e-06	0.000848378	1092.43	983.83	965.41	621.33	727.38	678.66
	ENSMUSG00000001794.13	Capns1	-0.467979	7.75015	26.3665	2.49668e-05	0.00230614	4507	4134	3485	2781	2770	2486
	ENSMUSG00000064080.12	Fbln2	-0.46792	7.61807	27.2566	1.99583e-05	0.00199476	3848	3944	3251	2467	2600	2272
	ENSMUSG00000053477.17	Tcf4	-0.467461	6.22915	33.2476	4.87009e-06	0.000681578	1490	1349	1365	912	910	980
	ENSMUSG00000024371.14	C2	-0.461412	6.7277	27.4824	1.88683e-05	0.00191521	2148.48	2166.07	1640.08	1312	1349	1308.33
	ENSMUSG00000026728.9	Vim	-0.461227	10.6129	19.2899	0.000181267	0.00959616	32068	30616	25361	20779	20968	16864
	ENSMUSG00000025509.15	Pnpla2	-0.459335	6.3554	25.6083	3.03099e-05	0.0026206	1786	1554	1263	877	1087	1114
	ENSMUSG00000055148.7	Klf2	-0.456939	5.24732	20.9244	0.000108015	0.00647871	817	757	556	449	493	481
	ENSMUSG00000023348.11	Trip6	-0.456893	5.27207	24.2558	4.31721e-05	0.0032868	820	740	604	453	500	495
	ENSMUSG00000021508.11	Cxcl14	-0.456683	7.13242	23.1801	6.56253e-05	0.00440851	2880	2943	2061	1641	1782	1851
	ENSMUSG00000001844.10	Zdhhc4	-0.456611	4.84859	21.3676	9.52254e-05	0.00584629	590	517	500	326	397	356
	ENSMUSG00000040152.8	Thbs1	-0.455594	7.71925	24.3796	4.17784e-05	0.00322479	4274.98	4214	3334	2694	2773.79	2440.93
	ENSMUSG00000001870.16	Ltbp1	-0.454472	6.37651	32.9897	5.15858e-06	0.000711179	1660	1566	1420	1017	1057	1046
	ENSMUSG00000006205.13	Htra1	-0.45346	6.32715	31.4762	7.27057e-06	0.00091996	1616	1436	1433	916	1086	1019
	ENSMUSG00000021493.15	Pdlim7	-0.453022	5.27751	22.4736	6.99152e-05	0.00461634	802	731	634	408	541	510
	ENSMUSG00000011877.13	Git1	-0.453	6.72894	23.9215	4.98585e-05	0.00362625	2265	2099	1591	1261	1462	1267
	ENSMUSG00000035914.11	Cd276	-0.452909	4.88741	22.3648	7.20472e-05	0.00471676	593.09	533	521.91	355.48	365	388.67
	ENSMUSG00000032011.5	Thy1	-0.451558	7.19059	26.8303	2.22061e-05	0.00214944	2818	2785	2555	1826	1987	1680
	ENSMUSG00000034926.3	Dhcr24	-0.451291	8.5995	22.5872	6.77611e-05	0.00453002	7238	6876	7497	4178	5187	5287
	ENSMUSG00000000957.11	Mmp14	-0.449656	7.91512	23.7555	4.9335e-05	0.00361188	4874	4750	3890	3033	3291	2762
	ENSMUSG00000026389.16	Steap3	-0.449055	5.36615	25.6128	3.02753e-05	0.0026206	777	749	766	496	515	539
	ENSMUSG00000039168.15	Dap	-0.448311	6.23621	26.8335	2.21884e-05	0.00214944	1575	1379	1259	968	999	867
	ENSMUSG00000021186.9	Fbln5	-0.448094	5.33952	22.3629	7.20864e-05	0.00471676	788	696	766	447	508	570
	ENSMUSG00000060166.6	Zdhhc8	-0.44689	5.24991	20.793	0.000112153	0.00664773	782	637	698	411	540	483
	ENSMUSG00000028763.18	Hspg2	-0.444296	8.38778	27.219	2.01462e-05	0.0020079	6683	6247	5767	3935	4455	4271
	ENSMUSG00000063160.12	Numbl	-0.44408	4.99704	22.0198	7.92894e-05	0.00507425	643	578	554	359	410	434
	ENSMUSG00000023942.15	Slc29a1	-0.442763	6.1998	28.9511	1.3174e-05	0.00145152	1447.47	1273.17	1366.64	871.12	965.41	939.24
	ENSMUSG00000022894.6	Adamts5	-0.440905	5.8176	25.315	3.26987e-05	0.00271287	1134	1076	931	719	648	759
	ENSMUSG00000048537.16	Phldb1	-0.439946	6.57679	27.7799	1.75294e-05	0.00181588	1867	1778	1667	1036	1274	1307
	ENSMUSG00000073755.4	5730409E04Rik	-0.439245	5.01134	19.9113	0.000144793	0.00810782	633	644	515	368	447	402
	ENSMUSG00000053641.9	Dennd4a	-0.435725	5.48661	24.4344	4.11781e-05	0.00319176	813	874	796	549	566	579
	ENSMUSG00000032024.10	Clmp	-0.435031	5.40628	20.9957	0.000105837	0.00639649	791.86	891.42	670.59	525.16	551.49	525.61
	ENSMUSG00000030122.12	Ptms	-0.43413	7.85916	23.8298	4.83622e-05	0.00356895	4843	4347	3759	2728	3260	2823
	ENSMUSG00000031375.17	Bgn	-0.432249	9.81809	23.6222	5.11328e-05	0.00370435	17668	16773	15749	10715	11437	12142
	ENSMUSG00000019487.11	Trip10	-0.431017	5.77076	26.8766	2.19496e-05	0.0021379	1064	1017	946	614	717	741
	ENSMUSG00000029231.15	Pdgfra	-0.430978	7.11503	27.2123	2.01801e-05	0.0020079	2685.53	2608.89	2401.91	1673	1697	1892
	ENSMUSG00000090394.8	4930523C07Rik	-0.430538	5.68863	24.0554	4.55348e-05	0.00338736	961.23	1020.5	874.57	668	646.96	635.56
	ENSMUSG00000025608.9	Podxl	-0.429943	6.10321	25.3504	3.24e-05	0.00270266	1310	1204	1290	875	893	836
	ENSMUSG00000026273.13	Mterf4	-0.429751	6.19149	26.7899	2.24328e-05	0.00216152	1427.46	1303.6	1319.27	809.53	967.88	999.81
	ENSMUSG00000038780.14	Smurf1	-0.429398	6.34195	25.6349	3.01032e-05	0.00261206	1664	1581	1268	958	1110	1012
	ENSMUSG00000052911.9	Lamb2	-0.429368	7.12257	25.3463	3.24348e-05	0.00270266	2725	2510	2495	1525	1866	1914
	ENSMUSG00000055172.10	C1ra	-0.428611	7.51824	24.3588	4.20091e-05	0.0032336	3547.52	3684.36	2956.87	2165	2309.41	2496.52
	ENSMUSG00000054146.8	Krt15	-0.426533	8.45805	23.9329	4.70474e-05	0.00348585	6610	6838	6055	4168	4752	4467
	ENSMUSG00000040690.15	Col16a1	-0.425344	6.18322	26.6658	2.31453e-05	0.00220023	1453	1348	1228	807	957	1003
	ENSMUSG00000070436.12	Serpinh1	-0.425306	8.16106	24.6673	3.87255e-05	0.00305292	5714	5467	4721	3559	3610	3719
	ENSMUSG00000050989.9	Selenon	-0.423956	5.43793	23.7773	4.90474e-05	0.00360302	848	802	747	537	580	528
	ENSMUSG00000001435.15	Col18a1	-0.422492	6.93495	22.5937	6.76396e-05	0.00452736	2555	2175	2061	1466	1762	1432
	ENSMUSG00000042121.16	Ssh1	-0.421365	5.2125	18.9834	0.00019057	0.00987988	722	750	579	455	506	447
	ENSMUSG00000029810.15	Tmem176b	-0.421203	5.73132	21.7017	8.66693e-05	0.00542746	1059	1030	853	708	682	626
	ENSMUSG00000001424.14	Snd1	-0.420779	6.56982	20.9445	0.000111393	0.00663103	1943	1800	1527	1288	1244	1076
	ENSMUSG00000037552.17	Plekhg2	-0.419936	6.17255	21.3343	9.61276e-05	0.00588672	1425	1387	1182	898	1038	809
	ENSMUSG00000002602.16	Axl	-0.419306	7.93378	23.028	6.0056e-05	0.00417403	4988	4585	3995	3175	3104	3033
	ENSMUSG00000015605.6	Srf	-0.419168	5.52537	22.1015	7.7507e-05	0.00501199	925	891	733	523	638	594
	ENSMUSG00000028047.11	Thbs3	-0.415469	6.10063	26.2294	2.58521e-05	0.00236169	1337.45	1291.62	1162.24	791.63	882.68	946.4
	ENSMUSG00000013846.10	St3gal1	-0.415429	7.22578	25.4678	3.14304e-05	0.00267339	2919	2749	2606	1817	2035	1865
	ENSMUSG00000040415.15	Dtx3	-0.414354	6.16824	25.6586	2.99198e-05	0.00260312	1346	1344	1275	818	970	961
	ENSMUSG00000031523.16	Dlc1	-0.412988	5.90892	20.4641	0.00012329	0.00711012	1117	1117	1075	687	710	900
	ENSMUSG00000037071.3	Scd1	-0.412721	10.2992	19.4836	0.000164213	0.00892239	24366.5	22697	22534.9	14115.8	16376.6	17827.9
	ENSMUSG00000022438.6	Parvb	-0.412549	5.5091	20.7413	0.000113829	0.00671833	970	814	734	530	639	570
	ENSMUSG00000019823.17	Mical1	-0.409874	5.66574	23.4181	5.40255e-05	0.00387094	1032.62	939.83	829.28	621.82	683.67	632.95
	ENSMUSG00000006476.19	Nsmf	-0.409719	5.14109	19.1423	0.000181732	0.00961044	674	663	604	391	491	467
	ENSMUSG00000039263.16	Npepl1	-0.407536	5.93961	25.0626	3.49175e-05	0.00284582	1172	1180	1029	735	826	788
	ENSMUSG00000047417.18	Rexo1	-0.405408	6.33239	21.6019	8.9133e-05	0.00553423	1612	1559	1277	931	1169	991
	ENSMUSG00000001576.15	Ergic1	-0.404212	6.16544	24.4238	4.12929e-05	0.00319176	1495	1247	1216	844	959	950
	ENSMUSG00000021144.14	Mta1	-0.403827	5.60697	19.7213	0.000153092	0.00845912	1034	865	789	554	700	615
	ENSMUSG00000038604.9	Ripor1	-0.4038	5.58704	22.4708	6.99686e-05	0.00461634	940	889	815	564	669	609
	ENSMUSG00000026596.13	Abl2	-0.402006	6.19367	24.0919	4.50934e-05	0.00336809	1454	1392	1187	849	952	1010
	ENSMUSG00000032431.6	Crtap	-0.401073	5.67773	21.6003	8.91732e-05	0.00553423	1024	870	918	588	700	677
	ENSMUSG00000022552.16	Sharpin	-0.400904	5.92459	20.4293	0.000124534	0.00715215	1233	1134	979	779	845	703
	ENSMUSG00000020167.14	Tcf3	-0.400638	5.73548	22.4465	7.04397e-05	0.0046419	1072	999	862	638	736	670
	ENSMUSG00000030770.15	Parva	-0.400207	6.59595	21.8485	8.3175e-05	0.00525016	1836	1762	1717	1093	1217	1412
	ENSMUSG00000002105.15	Slc39a13	-0.395277	5.45142	20.2224	0.000132234	0.00749375	846	753.65	795.92	526.55	594.61	559
	ENSMUSG00000024914.16	Drap1	-0.391062	5.8924	21.0083	0.000105458	0.00638055	1210	1133	922	731	808	748
	ENSMUSG00000031776.17	Arl2bp	-0.390503	5.61869	19.8898	0.000145707	0.00813218	970	964	763	608	646	637
	ENSMUSG00000022453.8	Naga	-0.389054	5.99512	19.0073	0.000189211	0.00987409	1242	1203	1052	839	885	730
	ENSMUSG00000048126.16	Col6a3	-0.385608	8.44083	19.4971	0.000163558	0.00890428	6384	6416	6213	4320	4404	4710
	ENSMUSG00000015837.15	Sqstm1	-0.38554	7.89399	19.2762	0.000174627	0.00936882	4877.26	4504.95	3698.72	2925.91	3241.86	3028.35
	ENSMUSG00000022994.9	Adcy6	-0.384139	6.62796	21.9837	8.00928e-05	0.00511975	1909.58	1919.32	1591.98	1183.62	1338.77	1301.77
	ENSMUSG00000004044.9	Cavin1	-0.38393	8.26674	19.7634	0.00015121	0.00838862	6254	5740	4925	3738	4117	4066
	ENSMUSG00000019102.10	Aldh3a1	-0.37861	5.70437	20.7035	0.000115072	0.00677111	1053	928	869	654	695	667
	ENSMUSG00000008206.16	Cers4	-0.372361	7.57592	18.9369	0.00019324	0.00998092	3469.23	3457.52	3462.36	2277	2636.26	2506.98
	ENSMUSG00000022687.12	Boc	-0.367391	5.79876	20.0574	0.000138742	0.0078222	1099	994	938	664	725	776
	ENSMUSG00000011256.16	Adam19	-0.366965	6.01009	19.4432	0.000166185	0.00900307	1207.16	1197.05	1100.95	831.88	879.66	791
	ENSMUSG00000043079.17	Synpo	-0.361259	6.43468	19.1323	0.000182274	0.00962994	1755	1535	1421	989	1205	1185
	ENSMUSG00000035498.10	Cdcp1	0.351782	6.31299	19.1825	0.000179564	0.00955968	1219	1130	1032	1184	1388	1406
	ENSMUSG00000038068.15	Rnf144b	0.353661	6.10208	19.7554	0.000151567	0.00839999	1048	978	892	1064	1200	1171
	ENSMUSG00000036499.9	Eea1	0.360494	5.86896	19.2987	0.000173466	0.00932458	846	839	786	904	970	1054
	ENSMUSG00000050912.15	Tmem123	0.366446	7.34182	18.9949	0.000189911	0.00987598	2459	2194	2203	2672	2607	2861
	ENSMUSG00000035597.19	Prpf39	0.3665	6.13715	19.8703	0.000146542	0.00817053	1090.25	954.67	930.21	1077.25	1163.38	1294.65
	ENSMUSG00000029422.15	Rsrc2	0.367837	6.28699	19.1865	0.00017935	0.00955743	1110	1092	1088	1139	1392	1397
	ENSMUSG00000047446.18	Arl4a	0.371909	6.11394	20.4576	0.00012352	0.00711602	1092	925	906	1064	1164	1256
	ENSMUSG00000060657.8	Marf1	0.373856	6.71796	20.3802	0.000126319	0.00722467	1484	1450	1490	1699	1767	1829
	ENSMUSG00000058446.14	Znrf2	0.376746	6.33573	20.4385	0.000124205	0.00714807	1183	1062	1147	1238	1370	1462
	ENSMUSG00000027401.9	Tgm3	0.379925	8.24149	19.9479	0.000143251	0.00803553	4590	4205	3944	4841	5018	5407
	ENSMUSG00000022286.16	Grhl2	0.380624	5.97045	21.4764	9.23419e-05	0.0057117	946	845	842	950	1072	1141
	ENSMUSG00000026754.16	Golga1	0.381948	5.85138	19.8409	0.000147812	0.00821652	838	775	806	848	1008	1059
	ENSMUSG00000021754.17	Map3k1	0.382128	6.86454	22.7992	6.3929e-05	0.00434725	1733	1665	1499	1880	1997	2000
	ENSMUSG00000030264.14	Thumpd3	0.384491	5.49937	20.5801	0.00011923	0.00695564	683.08	615.85	596.94	712.17	767.82	800.78
	ENSMUSG00000032872.16	Cyb5r4	0.384911	5.94565	21.7987	8.4342e-05	0.0053057	979.48	839.28	771.95	991.19	1027.37	1091.4
	ENSMUSG00000041225.16	Arhgap12	0.386007	5.71649	19.1505	0.000181288	0.00959616	791	697	714	811	842	1002
	ENSMUSG00000042644.9	Itpr3	0.386279	7.9047	19.2644	0.000175243	0.00938372	3635.98	3541.99	2897.98	3611.96	4361.91	4152.98
	ENSMUSG00000022228.14	Zscan26	0.387803	6.54827	19.8415	0.000147782	0.00821652	1321.96	1225.42	1362.19	1407.76	1624.88	1701.65
	ENSMUSG00000027347.18	Rasgrp1	0.387826	5.37551	19.207	0.000178261	0.00951181	617	575	545	641	683	772
	ENSMUSG00000022408.7	Fam83f	0.388175	5.56601	19.389	0.000168878	0.00912222	760.47	626.49	601.21	755.54	860.08	775.17
	ENSMUSG00000021123.12	Rdh12	0.388479	6.10101	22.06	7.84079e-05	0.00502945	1061	952	866	1022	1195	1256
	ENSMUSG00000033721.16	Vav3	0.388978	6.28134	23.0036	6.04579e-05	0.00417403	1175	1061	1022	1325	1277	1322
	ENSMUSG00000030793.4	Pycard	0.389086	6.93325	21.8537	8.30538e-05	0.00524849	1763.17	1722.46	1629.55	2087.4	2093.14	1988.14
	ENSMUSG00000078515.4	Ddi2	0.391246	7.46638	20.6662	0.000116311	0.00682126	2539.85	2390.18	2459.67	2641.12	3109.17	3214.42
	ENSMUSG00000037933.16	Bicd2	0.392268	7.48283	21.9634	8.05476e-05	0.00514289	2621	2638	2233	2847	3035	3174
	ENSMUSG00000001542.7	Ell2	0.392284	5.88626	23.3386	5.51993e-05	0.00392708	886	813	774	976	1036	976
	ENSMUSG00000026605.14	Cenpf	0.39257	5.65289	19.0085	0.000189143	0.00987409	767	618	715	819	844	879
	ENSMUSG00000004771.12	Rab11a	0.393542	6.92522	21.6381	8.82302e-05	0.005488	1917.52	1731.92	1449.18	1943.53	2028.32	2181
	ENSMUSG00000019726.12	Lyst	0.39459	5.71434	21.1053	0.000102582	0.0062338	761	756	675	832	978	846
	ENSMUSG00000020334.6	Slc22a4	0.394974	5.75926	22.8091	6.3756e-05	0.00434081	784	745	730	841	923	978
	ENSMUSG00000031608.13	Galnt7	0.397576	5.20191	19.5519	0.00016093	0.00878712	548	490	495	585	623.98	653
	ENSMUSG00000039879.9	Heca	0.39791	6.1748	21.8635	8.28256e-05	0.00524004	1112	981	925	1107	1171	1386
	ENSMUSG00000044433.16	Camsap3	0.398058	6.42468	20.5453	0.000120432	0.0069963	1303.87	1193.6	1091.23	1197.05	1557.7	1611.69
	ENSMUSG00000031381.16	Piga	0.399325	5.19385	18.9524	0.000192345	0.00995325	556	493	476	549	632	674
	ENSMUSG00000023827.8	Agpat4	0.400435	5.68106	19.0911	0.000184527	0.009711	821	739	586	765	904	935
	ENSMUSG00000048100.13	Taf13	0.401117	5.78725	22.0933	7.76835e-05	0.00501199	857.5	729.85	715.35	820.16	969.84	1014.35
	ENSMUSG00000044783.16	Hjurp	0.403531	7.99818	21.6639	8.7593e-05	0.00547107	3765	3321	3554	4003	4557	4436
	ENSMUSG00000020785.17	Camkk1	0.403878	5.84193	21.8335	8.35253e-05	0.00526627	837	816	734	824	1022	1071
	ENSMUSG00000034724.18	Cnot6l	0.404856	6.12827	20.5593	0.000119949	0.0069777	1069	922	921	1127	1068	1356
	ENSMUSG00000032540.16	Abhd5	0.407726	6.45673	23.7195	4.98135e-05	0.00362625	1281.95	1226.89	1142	1295.7	1510.48	1667.04
	ENSMUSG00000026385.16	Dbi	0.408302	7.31187	19.9966	0.000141224	0.00795407	2360	2216	2035	2242	2740	3123.99
	ENSMUSG00000035778.17	Ggta1	0.410671	6.94892	24.2032	4.37791e-05	0.0032868	1832	1697	1604	2148	2103	2023
	ENSMUSG00000026179.14	Pnkd	0.410914	5.41924	20.7104	0.000114845	0.00677111	642.62	589.62	543	618.82	769.47	791
	ENSMUSG00000020463.15	Ppp4r3b	0.411097	6.21449	24.429	4.12371e-05	0.00319176	1146	983	957	1224	1191	1360
	ENSMUSG00000070923.4	Klhl9	0.412531	5.55103	19.1755	0.000179942	0.0095686	675	580	683	720	791	874.78
	ENSMUSG00000035168.16	Tanc1	0.412768	7.32149	24.3474	4.21363e-05	0.0032344	2395	2142	2104	2435	2782	2940
	ENSMUSG00000017607.9	Tns4	0.414151	8.06825	20.4853	0.000122538	0.0070889	4301	3767	3118	4035	4873	4793
	ENSMUSG00000002996.17	Hbp1	0.415155	6.48109	25.5425	3.0829e-05	0.00265306	1326.57	1237.01	1141.15	1431.8	1446.98	1671.54
	ENSMUSG00000000001.4	Gnai3	0.415532	7.55426	24.9296	3.61514e-05	0.00292062	2890	2556	2362	3055	3178	3346
	ENSMUSG00000034557.14	Zfyve9	0.415974	6.22525	24.9922	3.55647e-05	0.00288585	1093.22	1065.58	942.42	1180.4	1216.57	1415.91
	ENSMUSG00000030077.11	Chl1	0.416104	6.05453	22.7403	6.49703e-05	0.00438048	1041	943	778	1103	1061	1219
	ENSMUSG00000055333.14	Fat2	0.416856	7.43242	24.7367	3.80259e-05	0.0030118	2491	2317	2342	2666	3119	3032
	ENSMUSG00000056632.8	Dsg3	0.417947	7.01524	24.7849	3.7548e-05	0.00298987	1968	1709	1685	1987	2192	2426
	ENSMUSG00000098178.1	Gm42418	0.419045	6.86076	23.3403	5.51736e-05	0.00392708	1915.51	1526.02	1390.18	1857.42	2030.82	2041.5
	ENSMUSG00000024096.17	Ralbp1	0.419517	7.45504	24.818	3.72237e-05	0.00297505	2738	2404	2142	2746	3125	3090
	ENSMUSG00000081049.1	Rps24-ps3	0.420464	5.11249	20.6594	0.00011654	0.00682746	492.05	462.33	471.84	550.26	587.96	624.05
	ENSMUSG00000044646.15	Zbtb7c	0.42051	5.87857	21.7119	8.642e-05	0.00541797	941	807	693	852	1098	1057
	ENSMUSG00000021701.8	Plk2	0.420897	5.42932	20.3946	0.000125792	0.00720944	685	613	489	707	775	713
	ENSMUSG00000020130.9	Tbc1d15	0.421408	5.34008	22.4278	7.08049e-05	0.00466043	591	551	530	627	680	759
	ENSMUSG00000001376.17	Vps50	0.422554	5.08027	20.9818	0.000106259	0.00640802	508	448	440	554	566	603
	ENSMUSG00000039682.12	Lap3	0.423495	6.77158	25.5271	3.09525e-05	0.00265466	1675	1553	1299	1678	1926	1983
	ENSMUSG00000038633.5	Degs1	0.423834	8.16588	19.3761	0.000169524	0.00913041	4624	4055	3252	4358	4799	5545
	ENSMUSG00000030137.8	Tuba8	0.423956	5.47974	20.7942	0.000112116	0.00664773	680.68	625.46	538.93	657.22	753.16	870.99
	ENSMUSG00000036825.12	Ssx2ip	0.424671	5.77107	25.4568	3.15198e-05	0.00267339	844.98	720.91	690.89	833	966	991.96
	ENSMUSG00000004885.5	Crabp2	0.42486	5.46683	20.9198	0.000108157	0.00648018	693	639	499	682	768	809
	ENSMUSG00000031696.9	Vps35	0.425864	7.24736	25.9932	2.7458e-05	0.00247037	2295	2051.99	1934	2558	2480.96	2721
	ENSMUSG00000024270.11	Slc39a6	0.427985	6.71863	23.2442	5.66291e-05	0.00398786	1623	1490	1244	1554	1806	2038
	ENSMUSG00000020640.10	Itsn2	0.428172	6.88554	25.6841	2.97243e-05	0.00259426	1616.65	1603.35	1643.04	1906.96	1987.84	2153.26
	ENSMUSG00000069255.13	Dusp22	0.43453	6.37334	28.5659	1.44611e-05	0.0015684	1230	1111	1070	1261	1446	1546
	ENSMUSG00000027555.8	Car13	0.434688	6.5394	28.514	1.46448e-05	0.00157917	1405	1259	1167	1557	1526	1679
	ENSMUSG00000067889.6	Sptbn2	0.435084	8.01578	22.9416	6.1489e-05	0.00422278	3968.71	3783	2938.66	4033.93	4710.6	4538.73
	ENSMUSG00000039782.15	Cpeb2	0.435226	5.78309	22.0712	7.81636e-05	0.00502541	818	741	705	822	884	1119
	ENSMUSG00000038212.16	Mfsd14b	0.436399	6.05017	26.7644	2.25775e-05	0.00216858	1012	873	841	1158	1074	1157
	ENSMUSG00000045019.4	Acer1	0.437154	6.8988	25.3974	3.20078e-05	0.00269408	1730.43	1680.11	1497.42	1756.44	2061.96	2316.15
	ENSMUSG00000027377.2	Mall	0.438656	5.19928	19.7425	0.000152142	0.00842346	587	483	441	531	654	701
	ENSMUSG00000020023.18	Tmcc3	0.439403	6.36633	23.1019	6.20086e-05	0.00424879	1231	1087	1070	1174	1404	1667
	ENSMUSG00000021775.11	Nr1d2	0.440322	6.23587	24.3666	4.1923e-05	0.00323146	1108	981	1002	1132	1233	1509
	ENSMUSG00000026131.20	Dst	0.441156	9.31311	22.5959	6.75987e-05	0.00452736	8754.75	8568.85	8729.84	9545.49	11466.5	11735
	ENSMUSG00000022186.14	Oxct1	0.441405	7.55817	27.761	1.76113e-05	0.00181775	2795.94	2497.97	2443.91	3098.92	3136.99	3441.86
	ENSMUSG00000026775.9	Yme1l1	0.442302	6.31722	30.7788	8.54381e-06	0.00104527	1199	1069	1005	1294	1350	1450
	ENSMUSG00000038056.15	Kmt2c	0.44294	6.30863	24.2375	4.33818e-05	0.0032868	1083.64	1040.27	1114.93	1198.77	1319.74	1557.66
	ENSMUSG00000011884.13	Gltp	0.444466	8.7646	19.4074	0.000186291	0.00976765	7070	6122	4748	6426	7840	8153
	ENSMUSG00000063060.6	Sox7	0.444671	5.59021	26.3743	2.49174e-05	0.00230542	726	609	637	753	843	879
	ENSMUSG00000027376.15	Prom2	0.444997	7.12863	25.5222	3.09912e-05	0.00265466	2163	1869	1716	2034	2577	2602
	ENSMUSG00000022105.6	Rb1	0.445978	5.50192	25.8763	2.82924e-05	0.0024966	649	607.93	594.52	759.18	732.44	834.24
	ENSMUSG00000038250.9	Usp38	0.449269	5.59662	25.9311	2.78978e-05	0.00248974	744.71	679	559	780	820	887.81
	ENSMUSG00000026577.13	Blzf1	0.449531	5.57648	20.3981	0.000161441	0.00880631	654	663	629	666	820.98	974
	ENSMUSG00000020697.16	Lig3	0.450923	6.16631	28.5314	1.4583e-05	0.00157853	1013.21	907.17	1006.71	1151.83	1288.96	1255.79
	ENSMUSG00000001774.8	Chordc1	0.451097	5.43813	26.3932	2.47982e-05	0.00229823	627	581	561	666	748	818
	ENSMUSG00000034957.10	Cebpa	0.451538	7.08276	24.9833	3.56476e-05	0.00288834	2212	1839	1519	2150	2382	2455
	ENSMUSG00000025085.16	Ablim1	0.452015	8.46282	23.2713	5.62146e-05	0.00397752	4877	4851	4672	5245	5962	7019
	ENSMUSG00000066232.4	Ipo7	0.452183	7.08943	29.9382	1.04072e-05	0.00120412	2056	1756	1757	2232	2313	2470
	ENSMUSG00000042207.17	Kdm5b	0.453673	6.30868	24.2542	4.8901e-05	0.00359913	1139	1082	1014	1114	1376	1607
	ENSMUSG00000059824.12	Dbp	0.455718	5.29457	19.8237	0.000163939	0.00891623	601.72	525.24	475.47	547.79	678.22	800.68
	ENSMUSG00000003309.14	Ap1m2	0.459258	5.08439	23.0023	6.04779e-05	0.00417403	498	473	410	502	630	619
	ENSMUSG00000078684.8	5830417I10Rik	0.460009	5.9794	25.8982	2.81337e-05	0.0024966	873.48	776.41	910.42	970.02	1159.06	1129.58
	ENSMUSG00000067597.5	Dgat2l6	0.460748	4.61725	19.6777	0.000155071	0.00853445	350	321	324	370	457	438
	ENSMUSG00000026977.17	2007-03-01	0.461168	5.98395	21.2736	0.000193145	0.00998092	994	840	749	1006	967	1296
	ENSMUSG00000098188.1	Sowahc	0.462279	5.26588	27.253	1.99761e-05	0.00199476	580	509	476	630	672	682
	ENSMUSG00000053522.11	Lgals7	0.463109	8.70511	21.181	0.000112079	0.00664773	6609	6102	4378	6683	7631	7277
	ENSMUSG00000027708.14	Dcun1d1	0.465427	5.35463	24.234	4.34224e-05	0.0032868	603.71	519.52	536.09	660.5	649.35	803.17
	ENSMUSG00000034917.8	Tjp3	0.465874	4.87915	19.5798	0.000159608	0.00873214	407	435	351	437	499	585
	ENSMUSG00000022742.6	Cpox	0.466226	4.87612	19.6952	0.000154275	0.00851599	456	367.78	368.37	421.04	528.02	570.43
	ENSMUSG00000020283.5	Pex13	0.466426	5.21672	23.4156	5.40609e-05	0.00387094	555	519	437	580	610	732
	ENSMUSG00000056216.9	Cebpg	0.467588	6.71888	29.3171	1.20651e-05	0.00135907	1476	1320	1470	1658	1826	1971
	ENSMUSG00000084128.10	Esrp2	0.469135	7.36322	26.9138	2.17451e-05	0.00212172	2438.48	2230.1	2023.89	2343.01	3103.49	3106.52
	ENSMUSG00000043262.16	Uevld	0.469687	4.96751	23.7702	4.9141e-05	0.00360302	462.77	389.59	412.73	523.98	530.75	559.78
	ENSMUSG00000022510.14	Trp63	0.470057	7.76741	26.604	2.35096e-05	0.00221964	3320	2849	2690	3274	3704	4333
	ENSMUSG00000041439.15	Mfsd6	0.470727	6.78043	25.3783	3.68261e-05	0.00296218	1664	1452	1350	1547	1950	2216
	ENSMUSG00000027533.10	Fabp5	0.471201	9.27038	25.924	2.79485e-05	0.00249025	9186.16	8821.46	7118.57	9639.09	10893.5	11516.4
	ENSMUSG00000014956.15	Ppp1cb	0.471264	7.18064	24.3637	5.06197e-05	0.0036768	2203	1856	1832	2274	2266	2985
	ENSMUSG00000030471.17	Zdhhc13	0.471502	4.7471	22.4735	6.99165e-05	0.00461634	402	357	328	424	466	498
	ENSMUSG00000027782.10	Kpna4	0.472667	6.64403	32.9343	5.22285e-06	0.000715048	1459	1317	1277	1666	1642	1872
	ENSMUSG00000018796.13	Acsl1	0.473884	7.71847	27.4708	1.89229e-05	0.00191724	3136	2846	2566	3098	3701	4152
	ENSMUSG00000017291.13	Taok1	0.475735	6.62327	27.0346	2.10964e-05	0.00208658	1475	1302	1218	1552	1550	2016
	ENSMUSG00000015970.19	Chdh	0.477283	6.24782	32.1006	6.30359e-06	0.000822003	1013.16	994.98	1053.85	1249.21	1314.82	1377.07
	ENSMUSG00000078485.3	Plekhn1	0.47898	8.3949	26.9745	2.14167e-05	0.00210077	4903	4921	3824	5158	6197	6159
	ENSMUSG00000024483.19	Ankhd1	0.479183	6.50828	28.4695	1.4804e-05	0.00159003	1206.35	1175.07	1282.5	1388.1	1585.78	1758.9
	ENSMUSG00000031095.15	Cul4b	0.479485	4.50671	18.9963	0.000189832	0.00987598	304	303	306	341	394	443
	ENSMUSG00000031667.16	Aktip	0.47957	5.20674	24.8131	3.72709e-05	0.00297505	530.38	465.36	493.05	562.41	629.18	725.95
	ENSMUSG00000031176.8	Dynlt3	0.479764	6.83757	28.3003	1.54274e-05	0.00162858	1745	1456	1428	1897	1790	2251
	ENSMUSG00000027589.14	Pcmtd2	0.479981	5.25537	21.2058	0.000121033	0.00702385	499	471	563	580	666	737
	ENSMUSG00000021930.14	Spryd7	0.480071	5.32734	26.3235	2.52406e-05	0.00232369	607	556	461	613	701	771
	ENSMUSG00000036985.12	Zdhhc9	0.481912	6.28582	25.1396	6.04119e-05	0.00417403	1155	1128	875	1146	1338	1579
	ENSMUSG00000044408.7	Sptssa	0.481953	6.93942	28.6705	1.40988e-05	0.00153813	1849	1481.18	1626	1914	2069	2403.18
	ENSMUSG00000031398.13	Plxna3	0.482069	5.85917	28.5137	1.4646e-05	0.00157917	777	789	770	837	1070	1115
	ENSMUSG00000092274.3	Neat1	0.482535	12.1448	25.6331	3.01168e-05	0.00261206	64206.8	61155.8	57509.7	70827.6	85288.4	79693.1
	ENSMUSG00000046834.7	Krt1	0.482831	11.8921	20.4073	0.000125331	0.00719045	58546	55252	40509	57563	67006	73550
	ENSMUSG00000020330.16	Hmmr	0.484649	4.95671	21.4869	9.20693e-05	0.0057012	434	375	437	562	515	530
	ENSMUSG00000058006.12	Mdn1	0.48921	6.02724	32.0326	6.40176e-06	0.000827938	900	836	882	986	1167	1247
	ENSMUSG00000028115.16	Bnipl	0.48973	5.7631	23.9696	8.53399e-05	0.00535631	841.81	776.19	575.54	808.78	966.05	1057.36
	ENSMUSG00000027765.6	P2ry1	0.490804	4.67671	22.3287	7.27712e-05	0.0047415	352	317.45	354.1	419.1	456.85	452.13
	ENSMUSG00000036282.15	Naa30	0.492245	4.75079	22.7682	6.4476e-05	0.00436495	411	338	332	443	441	515
	ENSMUSG00000026235.14	Epha4	0.493643	4.86931	20.3628	0.000126956	0.00723874	407	364	398	450	466	606
	ENSMUSG00000026317.7	Cln8	0.493748	6.11932	30.6823	8.7381e-06	0.00106201	1007	1037	756	1152	1228	1242
	ENSMUSG00000032425.15	Zfp949	0.498453	4.59043	22.9736	6.09537e-05	0.00419641	328	332	302	373	426	456
	ENSMUSG00000050756.3	Defb6	0.499004	4.72419	23.2561	5.64458e-05	0.00398063	361	332	361	419	457	501
	ENSMUSG00000027356.8	Fermt1	0.499678	5.14324	25.7181	2.9465e-05	0.00257974	459	504	448	524	644	678
	ENSMUSG00000024597.11	Slc12a2	0.499779	5.67783	28.3748	1.51495e-05	0.00161229	680	727	640	773	861	1042
	ENSMUSG00000032091.15	Tmprss4	0.500451	6.01721	36.8235	2.25066e-06	0.000390677	933.99	859.97	800.67	1052.23	1236.68	1093.24
	ENSMUSG00000055978.5	Fut2	0.500685	4.95699	24.8266	3.71399e-05	0.00297505	428.94	444.88	367.94	464.97	553.94	603
	ENSMUSG00000070604.5	Vsig10l	0.501525	4.60455	19.3249	0.00017212	0.00926125	369.63	327.81	276	343	438	490.24
	ENSMUSG00000049421.13	Zfp260	0.502478	5.65449	26.5457	2.98141e-05	0.002598	660	664	684	815	791	1025
	ENSMUSG00000027132.3	Katnbl1	0.503269	4.93642	27.027	2.11367e-05	0.00208658	434	415	374	504	508.2	585
	ENSMUSG00000027007.16	Itprid2	0.503413	7.64683	29.1726	1.24905e-05	0.00139846	2931	2947	2174	3192	3482	3818
	ENSMUSG00000030340.16	Scnn1a	0.503849	4.611	19.3787	0.000169393	0.00913041	359	363	256	383	414	478
	ENSMUSG00000023953.9	Polh	0.505225	4.96785	26.3135	2.53051e-05	0.00232576	438	397	412	514	603	516
	ENSMUSG00000032015.16	Pou2f3	0.505477	5.88427	35.4846	2.98828e-06	0.000470493	835	770	754	901	1044	1148
	ENSMUSG00000019761.10	Krt10	0.50605	13.1849	21.4337	9.34614e-05	0.00576806	143357	135245	96150.3	147921	170616	169614
	ENSMUSG00000040471.17	Ggt6	0.506552	4.58365	22.5155	6.91118e-05	0.00459262	342	291	321	372	426	454
	ENSMUSG00000055435.6	Maf	0.507184	7.49425	37.9303	1.78895e-06	0.000334019	2619.56	2363.06	2230.06	3018.2	3141.05	3278.48
	ENSMUSG00000045094.8	Arhgef37	0.507969	6.21874	33.8239	4.28637e-06	0.000618632	1033	1099	846	1155	1351	1397
	ENSMUSG00000053510.12	Nrd1	0.508917	8.17678	28.3717	1.51611e-05	0.00161229	4020.4	4109.68	3439.13	4278.57	5017.11	5907.45
	ENSMUSG00000027699.19	Ect2	0.508956	4.49771	22.8306	6.33833e-05	0.0043314	324	275	299	381	398	399
	ENSMUSG00000025504.14	Eps8l2	0.509389	6.60195	28.6374	2.26168e-05	0.00216859	1450.43	1380.32	1061.96	1407.5	1835.01	1858.52
	ENSMUSG00000048047.3	Zbtb33	0.511084	4.57289	20.6675	0.000116269	0.00682126	314.74	313	316	433	365	442
	ENSMUSG00000021340.13	Gpld1	0.511561	4.69431	25.9337	2.7879e-05	0.00248974	363.84	354.29	311.78	406.37	471.1	476.86
	ENSMUSG00000074604.9	Mgst2	0.511931	4.49535	22.9921	6.06469e-05	0.00418049	330	290	277	398	372	406
	ENSMUSG00000019866.15	Crybg1	0.512633	8.08243	37.0307	2.15526e-06	0.000380404	3858	3672.92	3289.97	4414.94	4841.92	4964.96
	ENSMUSG00000028148.11	Them5	0.516214	7.43484	28.2534	2.14918e-05	0.00210414	2549	2279	2075	2421	3164	3533
	ENSMUSG00000041444.14	Arhgap32	0.518814	6.47501	28.0195	3.80408e-05	0.0030118	1226	1112	1192	1285	1547	1853
	ENSMUSG00000022505.9	Emp2	0.519261	8.47791	33.7258	4.38015e-06	0.000626945	5201	4604	4395	5471	6364	6938
	ENSMUSG00000037999.13	Arap2	0.51937	5.47895	30.323	9.50478e-06	0.00113283	661	596	517.84	676.9	761.94	904.76
	ENSMUSG00000062210.13	Tnfaip8	0.521515	6.29705	35.6332	2.89482e-06	0.000460089	1214.99	1054	866.85	1384.99	1349.51	1389.58
	ENSMUSG00000037058.16	Paip2	0.522604	6.84317	38.5411	1.57882e-06	0.000302768	1599	1461	1494	1857	1957	2226
	ENSMUSG00000026638.15	Irf6	0.523554	7.23889	35.7501	2.82351e-06	0.00045357	2277	1891.95	1839.94	2385	2597	2972.95
	ENSMUSG00000052137.11	Rbm12b2	0.528825	4.47693	19.0872	0.000190177	0.00987598	262.46	281.49	329.75	355.68	416.78	396.04
	ENSMUSG00000021327.19	Zkscan3	0.528917	6.06743	34.278	3.87971e-06	0.00057338	855.71	833.84	951.61	1091.86	1197.31	1241.66
	ENSMUSG00000032475.15	Nck1	0.528972	5.30111	32.5512	5.69233e-06	0.000758352	566	476	516	611	736	729
	ENSMUSG00000007379.15	Dennd2c	0.52906	5.63504	29.5428	1.38095e-05	0.00151252	721	677	572	754	822	1044
	ENSMUSG00000034320.14	Slc26a2	0.52925	6.55095	37.8183	1.83064e-06	0.000338186	1333	1159	1218	1452	1641	1853
	ENSMUSG00000003955.8	Fam162a	0.529976	5.53206	33.9068	4.20888e-06	0.000612232	660	594	576	709	796.67	933
	ENSMUSG00000045838.8	Ccdc9b	0.530658	5.60931	24.0219	0.000142455	0.00801524	619	664	641	676	901	1002
	ENSMUSG00000031950.7	Gabarapl2	0.53195	6.19522	30.5246	1.78177e-05	0.00182528	1064.1	1022.35	818.71	1085.57	1263	1522.11
	ENSMUSG00000048027.9	Rgmb	0.532006	6.09783	34.1079	4.02699e-06	0.000593564	1001	791	914	1048	1237	1330
	ENSMUSG00000042225.3	Ammecr1	0.533427	5.21869	27.377	1.93688e-05	0.00194463	552	456	463	567	617	780
	ENSMUSG00000022051.15	Bnip3l	0.533578	6.41443	33.0601	6.55941e-06	0.000841502	1225.32	1144.5	1005.71	1334.79	1376.22	1793.33
	ENSMUSG00000042357.2	Gjb5	0.535157	5.53294	30.4886	9.14271e-06	0.00110152	723	623	490	743	795	904
	ENSMUSG00000000861.15	Bcl11a	0.536733	5.1596	32.3512	5.95533e-06	0.000782109	540	454	418	567.83	629.98	687
	ENSMUSG00000022197.16	Pdzd2	0.537541	7.16383	30.3011	1.65601e-05	0.00173493	1934	1867	1850	2089	2472	3035
	ENSMUSG00000031700.11	Gpt2	0.537632	5.09297	25.498	3.46237e-05	0.00282604	455	449	438	471	639	695
	ENSMUSG00000027806.9	Tsc22d2	0.537756	5.46201	26.9692	3.89069e-05	0.00306287	620	620	500	670	721	938
	ENSMUSG00000021120.11	Pigh	0.539509	4.52929	24.7359	3.80342e-05	0.0030118	306.08	287.7	310.62	360.09	413.5	442.52
	ENSMUSG00000040631.8	Dok4	0.539559	4.71156	23.0507	5.96869e-05	0.00416089	370.85	347.93	312.37	362.57	481.28	540.57
	ENSMUSG00000014592.20	Camta1	0.540248	5.49676	34.5967	3.61928e-06	0.000543589	612	578	585	690	792	905
	ENSMUSG00000062609.14	Kcnj15	0.54026	4.62056	25.3942	3.20348e-05	0.00269408	365.87	283.51	317.28	430.05	436.95	426.85
	ENSMUSG00000063894.15	Zkscan8	0.54099	4.69619	22.5098	6.92208e-05	0.00459436	333	309	372	427	425	514
	ENSMUSG00000031145.15	Prickle3	0.54101	5.77269	40.5018	1.06592e-06	0.000228087	755.18	702.79	692.85	845.79	1052.76	992.33
	ENSMUSG00000005958.15	Ephb3	0.541569	5.29821	30.6865	8.72943e-06	0.00106201	567	500	482	561	768	754
	ENSMUSG00000039221.10	Rpl22l1	0.546891	6.04435	40.8996	9.85697e-07	0.000216779	961.88	828	806.13	1124.42	1082.24	1284.46
	ENSMUSG00000052563.13	D930048N14Rik	0.547034	4.60666	25.3411	3.24782e-05	0.00270266	334	333	288	354	467	468
	ENSMUSG00000037434.7	Slc30a1	0.547581	5.85167	36.7446	2.28819e-06	0.000395058	872.79	760.21	643.41	885.73	1027.02	1148.44
	ENSMUSG00000027246.12	Ell3	0.550681	4.64509	25.8946	2.816e-05	0.0024966	335.06	348.3	296.23	368.28	493	464.36
	ENSMUSG00000057719.11	Sh3rf2	0.552275	6.57936	35.7914	3.08068e-06	0.000479902	1325	1191	1231	1407	1691	1986
	ENSMUSG00000039092.9	Sptlc3	0.552965	5.41358	36.2129	2.55922e-06	0.000424478	590	555	524	656	743	862
	ENSMUSG00000000320.10	Alox12	0.555756	4.85169	28.6972	1.40077e-05	0.0015312	407	378	344	430	512	590
	ENSMUSG00000015619.10	Gata3	0.557552	5.92175	36.5546	2.38128e-06	0.000403587	897	693	782	924	1108	1191
	ENSMUSG00000026220.6	Slc16a14	0.558126	4.32626	22.3746	7.18529e-05	0.00471565	280	222	278	345	355	360
	ENSMUSG00000027276.7	Jag1	0.558698	6.59051	37.689	1.88009e-06	0.000343848	1409	1195	1171	1432	1709	1991
	ENSMUSG00000048280.18	Zfp738	0.560642	4.17187	19.6918	0.000154429	0.00851604	231.01	205	261.89	318.03	305.37	328.97
	ENSMUSG00000022754.6	Tmem45a	0.561897	7.45755	35.8924	2.73921e-06	0.00044519	2680	2257	1961	2933	2867	3549
	ENSMUSG00000064201.8	Krt2	0.562023	13.0017	23.5862	7.89147e-05	0.00505611	123484	117817	81373	125552	150742	161081
	ENSMUSG00000024276.7	Zfp397	0.562266	5.341	31.7689	6.79876e-06	0.000866193	536	484	556	643	686	825
	ENSMUSG00000001420.13	Tmem79	0.564543	5.26431	27.8027	3.18578e-05	0.00268735	568.57	557.33	379.29	607.01	722.42	715.15
	ENSMUSG00000029869.7	Ephb6	0.56488	6.9071	42.4156	7.34806e-07	0.000176293	1795	1589	1318	1920	2278	2195
	ENSMUSG00000028039.11	Efna3	0.565214	6.14859	38.6542	1.54293e-06	0.000298989	1079.23	935.37	764.98	1087.41	1302.07	1392.04
	ENSMUSG00000041842.15	Fhdc1	0.566633	5.59483	35.6158	2.9056e-06	0.000460089	706	611	569	697	912	969
	ENSMUSG00000035557.9	Krt17	0.56709	7.12679	32.3658	1.42952e-05	0.00155344	2198.11	1797.11	1486.16	2090	2627.15	2745.19
	ENSMUSG00000034574.10	Daam1	0.567605	6.80073	41.6165	8.57129e-07	0.000195638	1527	1454	1364	1682	1994	2275
	ENSMUSG00000074829.10	2010315B03Rik	0.570338	4.11939	21.1373	0.000101651	0.00619003	223	209	239	313	281	326
	ENSMUSG00000045394.9	Epcam	0.570745	5.20526	27.5168	3.5461e-05	0.00288165	515	541	382	543	721	704
	ENSMUSG00000049044.16	Rapgef4	0.571221	4.17906	19.9594	0.000142768	0.00801657	279	240	186	272.93	313	376.95
	ENSMUSG00000021636.15	Marveld2	0.571304	4.41179	26.6968	2.29651e-05	0.00219062	295	285	246	329	378	425
	ENSMUSG00000022468.12	Endou	0.572506	5.78055	39.052	1.42352e-06	0.000284812	807	709	626	863	934	1136
	ENSMUSG00000044252.18	Osbpl1a	0.572824	6.14722	40.3183	1.10526e-06	0.000233795	953	952.02	849.99	1051.82	1270.63	1464.89
	ENSMUSG00000057894.10	Zfp329	0.5743	4.25812	21.6447	8.80681e-05	0.005488	228	246	263	323	310	383
	ENSMUSG00000028392.15	Bspry	0.574937	4.20325	22.8989	6.22106e-05	0.00425651	271	250	194	282	360	338
	ENSMUSG00000032462.14	Pik3cb	0.577255	5.53121	45.7227	3.96072e-07	0.000109553	637.87	604.62	550.62	761.6	816.93	888.17
	ENSMUSG00000020656.16	Grhl1	0.580418	7.02427	34.2152	9.91874e-06	0.00115972	1882	1756	1426	1888	2381	2712
	ENSMUSG00000074647.3	Fam83c	0.580607	6.48637	31.6073	3.44537e-05	0.00282047	1287.97	1136.12	1056.59	1242.01	1693.92	1874.63
	ENSMUSG00000034171.13	Faah	0.581264	5.14864	24.8772	0.000111804	0.00664773	463	513	397	489	692	719
	ENSMUSG00000068134.13	Zfp120	0.581267	4.80628	32.7065	5.49679e-06	0.000743738	397	360	326	478	461	552
	ENSMUSG00000028654.13	Mycl	0.582715	6.26801	45.4657	4.15117e-07	0.000111681	1093	953	940	1169	1411	1549
	ENSMUSG00000045975.8	C2cd2	0.584971	6.06677	31.6163	3.43995e-05	0.00282047	913	876	804	952	1192	1454
	ENSMUSG00000005251.15	Ripk4	0.58514	5.71071	36.9595	2.73015e-06	0.000445022	808	694	534	837	1004	962
	ENSMUSG00000028236.3	Sdr16c5	0.585231	6.50716	47.0911	3.09353e-07	9.42013e-05	1329	1107	1089	1447	1611	1815
	ENSMUSG00000095105.2	Edaradd	0.585799	4.81669	31.0406	8.03959e-06	0.000994558	356	338	389	459	520	526
	ENSMUSG00000032561.15	Acpp	0.586087	7.06064	40.1879	1.13418e-06	0.000237198	1928	1676	1570	2013	2347	2805
	ENSMUSG00000048251.15	Bcl11b	0.586177	6.23087	51.5509	1.42751e-07	5.34556e-05	1057	944	905	1230	1320	1471
	ENSMUSG00000046410.10	Kcnk6	0.587094	5.76446	44.9804	4.53817e-07	0.000119199	769	754	583	910	1010	988
	ENSMUSG00000060301.6	2610008E11Rik	0.58812	4.7911	33.5997	4.50397e-06	0.000641683	377	336	353	460	474	545
	ENSMUSG00000022270.16	Retreg1	0.589851	5.82998	27.7857	0.000122449	0.0070889	805	707	685	846	940	1268
	ENSMUSG00000005968.14	Tuft1	0.591536	7.105	37.2003	3.82865e-06	0.000570397	1991	1830	1510	2082	2400	2918
	ENSMUSG00000028557.10	Rnf11	0.593328	6.249	31.7682	4.20848e-05	0.0032344	1112	1016	815	1177	1269	1640
	ENSMUSG00000028088.14	Fmo5	0.593954	4.27038	28.6404	1.42021e-05	0.00154635	279	238	225	319	348	364
	ENSMUSG00000032278.11	Paqr5	0.594011	4.60732	29.9409	1.04006e-05	0.00120412	333	296	307	370	439	497
	ENSMUSG00000013766.11	Ly6g6e	0.596279	4.20778	25.0999	3.45798e-05	0.00282604	265.62	256.11	188.96	299.89	345.62	341.84
	ENSMUSG00000018166.8	Erbb3	0.596655	6.89477	48.4373	2.43718e-07	7.94535e-05	1735	1452	1405	1855	2240	2305
	ENSMUSG00000052914.4	Cyp2j6	0.597427	5.35337	40.213	1.12855e-06	0.000236915	584	531	460	674	685	834
	ENSMUSG00000022297.15	Fzd6	0.597834	5.80399	45.1116	4.4299e-07	0.000117469	754.65	678	713	895	965	1141
	ENSMUSG00000048521.8	Cxcr6	0.597979	3.81857	19.0883	0.000184684	0.009711	167	194	177	264	268	219
	ENSMUSG00000069808.13	Fam57a	0.599732	6.64885	52.3532	1.2482e-07	4.88968e-05	1412.04	1272.17	1179.85	1616.13	1791.13	1990.19
	ENSMUSG00000032068.14	Plet1	0.602777	3.93398	20.3864	0.000126089	0.007219	209.9	174.92	198	228	262	328.89
	ENSMUSG00000036390.8	Gadd45a	0.60412	3.87947	22.91	6.20212e-05	0.00424879	186.66	199	175.24	229.53	262.91	295.49
	ENSMUSG00000022676.7	Snai2	0.604469	4.73427	33.733	4.37323e-06	0.000626945	360	307	350	445	473	510
	ENSMUSG00000104445.1	Rhbg	0.605651	4.22124	26.9888	2.13402e-05	0.00209698	267.71	237.9	208	346.9	337	313
	ENSMUSG00000033825.10	Tpsb2	0.605662	4.20566	25.4568	3.15193e-05	0.00267339	226	229	247	285	344	361
	ENSMUSG00000116594.1	Gm49601	0.607751	4.29123	23.3178	5.55107e-05	0.00394417	253.7	263.56	229.04	265.02	402.29	386.92
	ENSMUSG00000017679.16	Ttpal	0.609108	6.54572	45.3828	4.21467e-07	0.000112841	1255	1249	1077	1423	1656	1965
	ENSMUSG00000030559.8	Rab38	0.610176	4.65073	30.1569	9.8836e-06	0.00115972	364	291	305	416	411	523
	ENSMUSG00000003863.18	Ppfia3	0.610495	5.04053	27.4074	5.33744e-05	0.00383168	470	451	341	468	690	618
	ENSMUSG00000044244.18	Il20rb	0.612543	7.39661	54.4017	8.91604e-08	3.86044e-05	2302	2197	1955	2756	3219	3120
	ENSMUSG00000037185.9	Krt80	0.613679	7.67376	35.5419	9.08805e-06	0.00109971	2988.58	2784.54	2076.19	3101.36	3763.88	4180.67
	ENSMUSG00000046589.7	Lrrc8e	0.61542	4.58953	23.0816	0.00013224	0.00749375	374	323	226	364	476	458
	ENSMUSG00000074199.7	Krtdap	0.615819	8.82058	32.4305	1.77068e-05	0.00182403	6691	5718	4944	6595	8139	9769
	ENSMUSG00000037490.5	Slc2a12	0.619918	4.00549	26.4794	2.42623e-05	0.0022637	233.05	204.62	172.7	272.43	286.76	304.27
	ENSMUSG00000032261.16	Sh3bgrl2	0.62543	5.3413	45.0457	4.48389e-07	0.000118334	573	507	463	638	726	830
	ENSMUSG00000037617.12	Spag1	0.627466	4.16482	25.5972	3.0397e-05	0.00262404	249.91	252.7	177.53	280.86	339.62	347.49
	ENSMUSG00000028467.15	Gba2	0.631559	5.17911	40.7309	1.01889e-06	0.000220671	480.22	512.42	383	589.77	652.42	719.89
	ENSMUSG00000024887.10	Asah2	0.631569	4.91583	33.7164	4.38922e-06	0.000626945	377	398	366	459	522	655
	ENSMUSG00000025907.14	Rb1cc1	0.632513	5.82664	48.0511	2.60853e-07	8.31114e-05	736	724	689.39	930.44	945.84	1201
	ENSMUSG00000001053.15	N4bp3	0.633637	4.24488	29.4895	1.15781e-05	0.0013176	265	259	194	317	360	347
	ENSMUSG00000025277.14	Abhd6	0.634757	3.82651	21.6691	8.7466e-05	0.00547107	177	196	161	222	235	309
	ENSMUSG00000033102.15	Cdc14b	0.635478	5.15664	39.0051	1.43707e-06	0.000286348	479	499	374	578	622	734
	ENSMUSG00000029385.14	Ccng2	0.635907	5.08017	36.2007	2.56582e-06	0.000424478	432	376	466	600	576	654
	ENSMUSG00000021054.6	Sgpp1	0.636308	7.018	44.7581	6.95102e-07	0.000169706	1834	1661	1428	2020	2233	2797
	ENSMUSG00000117284.1	Gm7072	0.63674	4.19386	23.8487	5.18018e-05	0.00373816	292.53	215.48	185.83	353.81	311.43	321.36
	ENSMUSG00000029026.16	Trp73	0.636904	4.74559	39.5135	1.29734e-06	0.00026337	371	313	329	469	511	471
	ENSMUSG00000054889.10	Dsp	0.638387	11.4765	39.8793	1.20591e-06	0.000248449	38671	36274	33063	42420.9	54241.9	58689
	ENSMUSG00000025207.16	Sema4g	0.638396	6.0676	55.5178	7.45032e-08	3.30323e-05	911	855	773	1035	1262	1351
	ENSMUSG00000005148.8	Klf5	0.639633	6.75479	48.9603	2.22419e-07	7.56237e-05	1558	1262	1272	1676	1938	2265
	ENSMUSG00000048562.7	Sp8	0.640533	3.93826	25.4573	3.15153e-05	0.00267339	234	188	157	263	284	281
	ENSMUSG00000075593.10	Gal3st4	0.640543	4.92141	32.2534	9.40965e-06	0.00112391	396.7	411.81	335.3	424.05	607.22	618.07
	ENSMUSG00000044313.13	Mab21l3	0.641731	3.45108	20.466	0.000123221	0.00711012	143	125	141	191	186	212
	ENSMUSG00000027901.12	Dennd2d	0.641996	5.48236	52.8554	1.14842e-07	4.54619e-05	628.04	553.3	508.86	716.09	876.74	836.55
	ENSMUSG00000019851.8	Perp	0.642802	10.4195	37.0066	2.71711e-06	0.000444203	20535	17470	14059	21862	23970	28812
	ENSMUSG00000032238.17	Rora	0.644728	7.32549	29.0447	0.000161646	0.00880884	2177	2069	1817	2331	2774	3655
	ENSMUSG00000057337.13	Chst3	0.645694	5.45111	40.6137	1.7119e-06	0.000323807	580	479	585	674	835	873
	ENSMUSG00000060510.14	Zfp266	0.647497	6.31411	41.1248	5.51553e-06	0.000743738	1068	973	957	1244	1322	1773
	ENSMUSG00000008601.12	Rab25	0.648045	6.42395	50.251	1.8491e-07	6.52731e-05	1256	1122	873	1372	1594	1715
	ENSMUSG00000071267.11	Zfp942	0.649071	3.96491	24.5628	3.98053e-05	0.00311589	236.48	177.88	172.53	293.11	249.54	300.51
	ENSMUSG00000059898.9	Dsc3	0.65449	9.34614	46.9452	3.17539e-07	9.61657e-05	8902	7693	7886	10619	11313	13632
	ENSMUSG00000026034.17	Clk1	0.655585	7.59355	53.9057	9.66486e-08	4.15222e-05	2510	2301	2434	3061	3595	3904
	ENSMUSG00000063488.6	Zkscan7	0.655845	3.92378	22.0601	8.18551e-05	0.00519644	172.03	168	223.3	261.3	274.3	287.99
	ENSMUSG00000019853.6	Hebp2	0.656251	5.59092	34.4513	2.85483e-05	0.00251139	695	612	508	721	848	1066
	ENSMUSG00000024975.13	Pdcd4	0.656349	6.48904	45.2739	1.51109e-06	0.00029488	1211	1154	1012	1311	1665	1942
	ENSMUSG00000039457.4	Ppl	0.65643	8.85191	34.5715	1.77492e-05	0.00182501	6317	6286	4815	6598	9133	9603
	ENSMUSG00000042579.2	4632404H12Rik	0.659373	4.20651	25.6531	3.28292e-05	0.00271962	219	213	254	279	334	393
	ENSMUSG00000027243.8	Harbi1	0.65986	3.32271	19.6734	0.000155265	0.00853667	144	107	121.12	176	170.12	195
	ENSMUSG00000020669.15	Sh3yl1	0.659958	3.87332	27.3066	1.97114e-05	0.00197545	208	189	151	245	266	285
	ENSMUSG00000029381.16	Shroom3	0.660336	3.87275	23.281	5.60673e-05	0.00397622	194	203	150	209	297	292
	ENSMUSG00000035105.5	Egln3	0.661431	6.42903	43.7263	3.1237e-06	0.000483571	1213	1130	897	1380	1465	1870
	ENSMUSG00000028211.11	Trp53inp1	0.662575	5.3418	48.1186	2.57766e-07	8.31114e-05	579	462	478	728	678	805
	ENSMUSG00000039795.14	Zfand1	0.662784	4.18629	32.4371	5.84077e-06	0.000769493	233.38	225.73	219.07	289.19	329.51	373.36
	ENSMUSG00000055960.12	Skint4	0.662844	4.59966	28.5602	2.82776e-05	0.0024966	312	276	315	373	406	545
	ENSMUSG00000081683.5	Fzd10	0.66336	3.97153	26.1886	2.61218e-05	0.00237717	220	166	198	251	279	324
	ENSMUSG00000086968.8	4933431E20Rik	0.665201	4.6092	29.0836	2.41901e-05	0.00226077	296.47	290.98	319.9	384.7	403.46	545.39
	ENSMUSG00000078202.3	Nrarp	0.667822	5.69914	58.0113	5.03286e-08	2.57271e-05	749	597	598	944	930	963
	ENSMUSG00000004127.12	Trmt10a	0.668749	3.25183	20.9349	0.00010769	0.00647317	130.73	119.85	102.18	167.97	167.87	180
	ENSMUSG00000026315.13	Serpinb8	0.67008	6.33982	56.9226	5.96413e-08	2.80117e-05	1125	1041	866	1273	1483	1688
	ENSMUSG00000052572.19	Dlg2	0.67299	4.80137	28.4196	5.83839e-05	0.00408032	371	353	314	400	485	645
	ENSMUSG00000027487.11	Cdk5rap1	0.675915	3.31161	20.826	0.000111098	0.0066277	118	117	130	178	174	187
	ENSMUSG00000031757.7	Mt4	0.67872	7.13299	49.8544	3.39062e-07	9.96945e-05	1863	1939	1435	2248	2536	2936
	ENSMUSG00000030629.15	Zfand6	0.681889	6.44688	35.5842	5.71157e-05	0.00400685	1203	1029	1012	1326	1486	1994
	ENSMUSG00000037577.13	Ephx3	0.681893	3.99653	29.0946	1.27265e-05	0.00141063	196	186	206	246	306	322
	ENSMUSG00000054005.4	Mill1	0.684198	3.95308	31.1647	7.81192e-06	0.000972909	192	198	181	262	271	314
	ENSMUSG00000020840.10	Blmh	0.684492	6.71845	61.2184	3.09161e-08	1.80358e-05	1403	1328	1181	1696	1876	2227
	ENSMUSG00000029178.14	Klf3	0.684837	7.80421	56.8019	6.07835e-08	2.83082e-05	3165.88	2745.92	2411.8	3734.95	3934.85	4634.87
	ENSMUSG00000023892.8	Zfp51	0.687263	4.0505	32.6733	5.53792e-06	0.000744944	212	211	188	286	282	339
	ENSMUSG00000034245.10	Hdac11	0.68777	3.74334	25.8727	2.83185e-05	0.0024966	147.82	174.9	168.15	230.82	235.82	265
	ENSMUSG00000085786.1	Gm15987	0.687868	4.32719	39.4316	1.31881e-06	0.000266752	256	242	242	362	363	374
	ENSMUSG00000054619.7	Mettl7a1	0.688595	6.58328	73.7449	5.41671e-09	4.54772e-06	1304.9	1190.74	1061.95	1677.87	1786.78	1809.95
	ENSMUSG00000004865.16	Srpk1	0.68961	7.58101	57.351	5.57717e-08	2.70702e-05	2547	2370	2181	2901	3749	3927
	ENSMUSG00000018800.14	Abca5	0.691162	3.39081	21.1339	0.000101751	0.00619003	153	125	108	157	195	222
	ENSMUSG00000034112.9	Atp2c2	0.694522	3.14972	19.2538	0.000175796	0.00940426	117	119	89	134	186	165
	ENSMUSG00000051379.12	Flrt3	0.695476	4.72122	33.9568	7.92057e-06	0.000982027	334	332	305	390	461	604
	ENSMUSG00000056498.13	Tmem154	0.696056	6.23634	70.5574	8.25257e-09	6.153e-06	1004	939	843	1254	1364	1542
	ENSMUSG00000098318.7	Lockd	0.696267	3.0375	19.4441	0.000166142	0.00900307	117	89	94	131.83	160.54	155
	ENSMUSG00000022512.3	Cldn1	0.69793	6.96187	53.3145	2.00509e-07	7.03315e-05	1775	1503	1338	2012	2161	2718
	ENSMUSG00000063130.4	Calml3	0.698405	8.54902	41.2484	4.79582e-06	0.000675219	5213	5104	3580	5979	6903	7840
	ENSMUSG00000001672.14	Marveld3	0.698933	3.28485	22.7764	6.43311e-05	0.00436389	133	106	117	163	187	183
	ENSMUSG00000067006.12	Serpinb5	0.700484	8.34505	50.1344	2.06637e-07	7.15751e-05	4740	3907	3400	5227	5801	6969
	ENSMUSG00000024774.16	Ankrd22	0.701336	4.249	30.0471	1.04647e-05	0.00120825	292.14	231.08	179.06	355.08	321.87	366.69
	ENSMUSG00000031647.10	Mfap3l	0.702883	5.73722	43.4194	5.10199e-06	0.000706894	678	609	671	863	894	1192
	ENSMUSG00000035615.12	Frmpd1	0.704558	4.32916	28.6403	2.64773e-05	0.00240163	270	274	195	299	364	447
	ENSMUSG00000116953.1	9030025P20Rik	0.709387	4.79378	46.2668	3.58798e-07	0.000102695	344.96	313.73	353.91	463.59	556.92	510.68
	ENSMUSG00000073643.11	Wdfy1	0.709805	5.83269	45.2607	4.11063e-06	0.000602686	807	730	563	1094	1124	926
	ENSMUSG00000043029.2	Trpv3	0.709899	5.3341	47.281	5.20273e-07	0.000134739	549	484	448	598	751	888
	ENSMUSG00000071531.3	Gprin2	0.711044	4.80059	42.2544	7.57873e-07	0.000179496	325	355	337	440	502	600
	ENSMUSG00000011034.6	Slc5a1	0.711092	4.59885	37.5549	1.93292e-06	0.000348939	347	319	225	416	436	486
	ENSMUSG00000052557.11	Gan	0.711458	7.79628	40.5317	1.2255e-05	0.00137487	2839	2662	2648	3253	4051	5059
	ENSMUSG00000058454.15	Dhcr7	0.712763	6.23304	61.954	2.77187e-08	1.68813e-05	1051	926	789	1178	1412	1585
	ENSMUSG00000106951.1	5930430L01Rik	0.715819	3.56322	23.0197	6.01925e-05	0.00417403	161	116	152	194	204	253
	ENSMUSG00000026989.5	Dapl1	0.716827	6.34624	52.7979	6.89311e-07	0.000169706	1081	1038	864	1196	1587	1744
	ENSMUSG00000053765.4	Oas1f	0.717016	5.22044	60.335	3.52914e-08	1.96996e-05	503	464	398	633	748	684
	ENSMUSG00000059839.9	Zfp874b	0.719026	3.19249	20.5582	0.000119986	0.0069777	129.64	90.63	110.25	141.3	177.41	185.03
	ENSMUSG00000045087.8	S1pr5	0.719191	3.97362	34.5127	3.68605e-06	0.000552121	212	186	174	256	325	287
	ENSMUSG00000042250.13	Pglyrp4	0.720091	4.61094	35.1997	5.51155e-06	0.000743738	342	332	221	397	500	457
	ENSMUSG00000078495.10	Zfp984	0.720612	4.45847	25.3109	0.000166153	0.00900307	342.3	238.39	225.02	458.66	360.07	391.6
	ENSMUSG00000028786.15	Tmem54	0.720728	4.3485	35.5719	2.93299e-06	0.000463104	291	241	212	333	348	447
	ENSMUSG00000036814.13	Slc6a20a	0.720991	3.53694	22.7777	6.43075e-05	0.00436389	164.71	156.79	100.94	190.93	211.15	238.06
	ENSMUSG00000026107.11	Nabp1	0.721584	5.4802	58.5574	4.62592e-08	2.44165e-05	517	544	561	842	821	807
	ENSMUSG00000022123.9	Scel	0.724266	5.9136	62.1647	2.68699e-08	1.65462e-05	765	726	705	941	1099	1315
	ENSMUSG00000044921.5	Rassf9	0.726764	4.19198	35.6241	2.90041e-06	0.000460089	210	208	242	310	348	354
	ENSMUSG00000047757.17	Fancb	0.727159	3.22086	23.8039	4.86992e-05	0.00358904	113	119	104	148	181	185
	ENSMUSG00000049848.7	Ceacam19	0.731204	5.17943	47.9562	3.72472e-07	0.000104397	464	480	374	558	668	793
	ENSMUSG00000066704.6	Cyp2b19	0.732195	8.57998	50.7372	3.74858e-07	0.000104397	4821	4853.9	4247.88	5611.96	7434.98	8356.93
	ENSMUSG00000053886.4	Sh2d4a	0.732475	5.12572	56.2503	6.63095e-08	3.03714e-05	449	440	379	574	626	743
	ENSMUSG00000034317.14	Trim59	0.735003	4.7021	46.2563	3.59481e-07	0.000102695	333	285	323	457	450	539
	ENSMUSG00000037640.15	Zfp60	0.739213	3.67713	27.3894	1.93093e-05	0.00194463	170.45	130	159.54	232.62	212	262.95
	ENSMUSG00000096433.2	Zfp994	0.741303	3.24771	24.6309	3.9098e-05	0.00307355	130.35	102.52	108.17	180.85	170.57	172.47
	ENSMUSG00000022865.14	Cxadr	0.742762	5.83809	70.4751	8.3443e-09	6.153e-06	743.89	616.97	704.74	1054.82	1035.71	1096.11
	ENSMUSG00000067928.6	Zfp760	0.743356	3.65989	22.3643	0.000112971	0.00668191	140	127	184	218	222	261
	ENSMUSG00000074280.6	Gm6166	0.743748	5.06494	43.8593	1.61031e-06	0.000307742	486.41	406.44	322.96	528.54	614.62	726.2
	ENSMUSG00000022034.10	Esco2	0.744654	3.62518	29.5447	1.14267e-05	0.00130573	154	133	155	203	250	232
	ENSMUSG00000037188.7	Grhl3	0.745294	5.66811	64.7174	1.85446e-08	1.18134e-05	673	592	573	780	992	1074
	ENSMUSG00000027326.13	Knl1	0.749414	3.7416	30.8001	8.50137e-06	0.00104238	177	134	168	237	250	256
	ENSMUSG00000023918.12	Adgrf4	0.751002	6.14541	57.9961	2.82046e-07	8.73283e-05	1001	869	694	1137	1303	1527
	ENSMUSG00000028262.13	Clca3a2	0.751007	5.57834	59.0993	5.04137e-08	2.57271e-05	673.29	480.63	568.53	865.68	940.01	861.92
	ENSMUSG00000102813.1	Gm37795	0.751065	4.53291	50.9999	1.56669e-07	5.76436e-05	291	263	277	404	433	454
	ENSMUSG00000073602.10	Serpinb3b	0.756153	5.82002	66.5539	1.42957e-08	9.66197e-06	774.83	650	611	907.99	1027.75	1233
	ENSMUSG00000031351.15	Zfp185	0.758481	6.97254	52.7136	1.37306e-06	0.000275711	1620	1477	1419	1862	2357	2849
	ENSMUSG00000006342.15	Susd2	0.763328	6.33788	63.9594	7.25487e-08	3.26888e-05	1031	910	957	1236	1537	1780
	ENSMUSG00000092178.2	Gm45351	0.763402	3.32176	21.4651	9.43633e-05	0.00581725	106.04	126.57	121.39	195.11	146.58	212.77
	ENSMUSG00000032092.5	Mpzl2	0.768969	5.78611	68.627	1.0724e-08	7.61965e-06	768.44	610.25	600.06	909.93	1003.05	1191.02
	ENSMUSG00000113450.1	Gm49359	0.770658	4.06175	40.5964	1.04621e-06	0.000225612	195.7	201.93	194.94	315.82	289.95	326.91
	ENSMUSG00000043286.12	Pnpla1	0.776608	5.31725	33.4347	0.000132593	0.00750605	538	514	374	586	773.76	890.91
	ENSMUSG00000058093.13	Zfp729b	0.776913	3.63735	33.8575	4.25476e-06	0.000615674	166.15	135.64	139.35	219.14	223.47	254.23
	ENSMUSG00000035868.9	Zfp983	0.777227	2.91881	21.8921	8.2167e-05	0.00520432	108.88	77.77	80.36	142.98	141.53	135.45
	ENSMUSG00000021696.9	Elovl7	0.781818	6.72513	60.5859	2.82055e-07	8.73283e-05	1489	1225	1067	1684	1951	2346
	ENSMUSG00000031286.6	Glt28d2	0.789357	3.28758	26.4976	2.41503e-05	0.00226077	118.44	122	103.04	149.31	181.32	218.36
	ENSMUSG00000107705.1	Gm45062	0.790266	3.94676	30.3642	1.51858e-05	0.00161229	165.58	219.08	158.44	254.87	265.53	347.08
	ENSMUSG00000037681.13	Esyt3	0.792967	5.26261	40.2009	2.47908e-05	0.00229823	475.13	493.99	390.42	567.77	715.86	892.09
	ENSMUSG00000035834.11	Polr3g	0.793928	5.25797	49.2697	1.66867e-06	0.00031671	528	440	389	618	664	884
	ENSMUSG00000073802.5	Cdkn2b	0.796823	3.15145	24.2169	4.36195e-05	0.0032868	122	109	81	136	171	192
	ENSMUSG00000000416.16	Cttnbp2	0.800566	4.26889	37.0719	3.61565e-06	0.000543589	201	232	240.78	294	374.64	422.45
	ENSMUSG00000054046.7	Klk13	0.801533	3.7912	32.6366	5.58383e-06	0.000747491	173	174	139	213	248	321
	ENSMUSG00000032018.14	Sc5d	0.802455	5.43653	53.5172	9.82029e-07	0.000216779	532	484	507	674	779	1006
	ENSMUSG00000046623.8	Gjb4	0.809064	5.58605	64.6431	5.38943e-08	2.64326e-05	650	580	464	763	915	1054
	ENSMUSG00000053702.16	Nebl	0.810127	3.70283	33.4787	4.62634e-06	0.000655487	157	148	149	213	223	300
	ENSMUSG00000031953.2	Tmem170	0.811699	3.60525	31.3489	7.48667e-06	0.000940859	160	117	147	194	234	260
	ENSMUSG00000028996.9	Rbp7	0.81421	3.04393	22.1586	7.62852e-05	0.00493902	109	105	73	123	151	191
	ENSMUSG00000028572.13	Hook1	0.815645	4.47536	51.8296	1.36227e-07	5.18513e-05	266.73	271	239	368	401	493.95
	ENSMUSG00000047496.6	Rnf152	0.816327	3.47667	27.8967	1.70321e-05	0.00177432	163	122	104	171	210	249
	ENSMUSG00000069206.14	Zfp874a	0.822597	3.14534	24.616	3.9252e-05	0.00308128	108	81.37	115.75	157.43	156.59	184.97
	ENSMUSG00000046056.15	Sbsn	0.822995	9.7709	35.3961	0.000115797	0.00680551	11220.6	11751.8	7727.6	13373.5	18057.7	18564
	ENSMUSG00000041653.5	Pnpla3	0.823887	2.71954	21.0348	0.000104664	0.00633942	77	69	80	97.81	128.67	143.75
	ENSMUSG00000063047.9	Zfp780b	0.82877	3.33803	30.2794	9.60264e-06	0.00114203	113.25	107.5	127.27	196.61	187.42	187.39
	ENSMUSG00000078899.9	Gm4631	0.830614	4.6222	53.2064	1.08381e-07	4.44934e-05	298.77	269.94	284.76	381.7	472.99	550.51
	ENSMUSG00000028749.7	Pla2g2f	0.833934	7.37103	69.2138	5.07059e-08	2.57271e-05	2176	2084	1525	2735	3174	3571
	ENSMUSG00000038453.17	Srcin1	0.836828	5.28944	65.0647	2.97822e-08	1.7753e-05	460.52	464.58	428.7	589.67	778.34	873.34
	ENSMUSG00000075217.1	4833423E24Rik	0.838396	5.89088	47.1209	2.54523e-05	0.00233377	804	695	568	981	1029	1389
	ENSMUSG00000112640.1	Gm32687	0.839397	2.74305	23.174	5.77177e-05	0.00403885	76.16	87.52	65.01	131.39	121.71	123.76
	ENSMUSG00000020607.7	Lratd1	0.842052	6.23912	93.8511	5.0363e-10	7.34518e-07	989	844	789	1259	1438	1634
	ENSMUSG00000033765.5	Calm4	0.842848	9.99672	36.255	0.000110596	0.00660489	13764	13346	8554	17226	19160.9	22254
	ENSMUSG00000026097.9	Ormdl1	0.843389	3.82036	42.863	6.74654e-07	0.00016692	170	160	156	260	244	300
	ENSMUSG00000003469.9	Phyhip	0.846336	5.3292	68.1304	1.77372e-08	1.14304e-05	578	432	386	671	822	812
	ENSMUSG00000034107.10	Ano7	0.847071	3.39426	34.6525	3.57566e-06	0.000539964	141	107	113	184	202	212
	ENSMUSG00000048399.4	Tprg	0.848327	4.42412	52.3309	1.25284e-07	4.88968e-05	279	267	196	356	420	453
	ENSMUSG00000087692.1	Gm11940	0.849178	3.50678	37.2301	2.06759e-06	0.000368451	147.54	119.67	121.72	187.55	227.74	231.84
	ENSMUSG00000070305.10	Mpzl3	0.84996	5.1254	57.7802	2.36323e-07	7.79598e-05	440	444	323	562	655.96	786
	ENSMUSG00000027536.6	Chmp4c	0.855079	4.95565	41.7686	1.83472e-05	0.00186572	360.03	375.04	331.19	458.09	578.13	750.22
	ENSMUSG00000071281.12	Zfp65	0.856152	3.90406	45.2562	4.31365e-07	0.000114936	171	158	182	260	301	295
	ENSMUSG00000056999.15	Ide	0.857968	7.60664	37.5005	0.000185907	0.00975679	2477	2323	1926	2929	3589	4737
	ENSMUSG00000031877.9	Ces2g	0.862547	6.91587	61.6561	1.34488e-06	0.000271035	1504	1421	1228	1910	2188.8	2872
	ENSMUSG00000031284.16	Pak3	0.862823	4.16729	53.0128	1.11895e-07	4.4937e-05	213	211	190	303	333	395
	ENSMUSG00000070547.4	Mrgprb1	0.871654	2.86632	24.1118	4.48557e-05	0.00335485	81	70	94	118	136	162
	ENSMUSG00000030792.8	Dkkl1	0.872636	4.55857	32.419	0.00011509	0.00677111	316	302	190	378	448	533
	ENSMUSG00000030703.8	Gdpd3	0.872989	3.50408	33.3124	4.80028e-06	0.000675219	161.91	127.16	98.35	182.52	237.76	229.81
	ENSMUSG00000050714.9	Zbtb26	0.881347	2.78345	25.4238	3.17896e-05	0.00268735	70.27	74.22	85.55	117.92	139.5	134.66
	ENSMUSG00000024511.15	Rab27b	0.885932	5.10888	72.5155	6.36129e-09	5.1094e-06	409	392	369	569	628	801
	ENSMUSG00000089773.7	Skint1	0.885957	3.15683	33.4791	4.62592e-06	0.000655487	120	97	84	162	172	177
	ENSMUSG00000054662.8	Ano9	0.891118	6.63464	92.158	7.33595e-10	9.63708e-07	1258	1161	959	1584	2016	2175
	ENSMUSG00000064023.4	Klk8	0.89668	5.69872	76.8955	3.0111e-08	1.7753e-05	638.51	660.6	461.01	871.71	1026.6	1117.86
	ENSMUSG00000098905.2	Zfp953	0.896795	2.38778	22.7621	6.45831e-05	0.00436495	67.53	55.7	49.66	95.47	101.54	100.78
	ENSMUSG00000110537.1	Gm4316	0.89892	3.75727	47.807	2.72356e-07	8.57626e-05	155.26	163.12	136	250.75	282.24	246.52
	ENSMUSG00000002057.4	Foxn1	0.903724	4.61356	48.9752	1.54064e-06	0.000298989	314	273	238	362	479	584
	ENSMUSG00000039217.13	Il18	0.905245	4.67112	61.0946	3.14921e-08	1.81805e-05	341	291	228	448	460	571
	ENSMUSG00000086903.4	Hotair	0.910749	2.63007	26.5859	2.36171e-05	0.00222599	77	66	62	112	110	133
	ENSMUSG00000098678.1	Mroh6	0.911905	3.43056	32.7481	5.44556e-06	0.000743346	122	149	89	181	207	236
	ENSMUSG00000029314.14	Gpat3	0.915228	3.23125	26.3244	4.61198e-05	0.00342628	124.49	123.83	65.65	176.91	170.29	194.83
	ENSMUSG00000040154.11	Wfdc5	0.915352	3.60918	28.5513	5.69388e-05	0.00399999	146	167	95	217	207	283
	ENSMUSG00000038151.13	Prdm1	0.919048	5.10518	40.0927	8.15786e-05	0.00519078	432	424	299	534	656	822
	ENSMUSG00000070583.1	Fv1	0.924047	2.64552	25.4937	3.12201e-05	0.00266603	69	58	78	115	128	117
	ENSMUSG00000041886.7	Macc1	0.924363	4.10485	37.2335	1.49383e-05	0.00160005	219	200	155	284	287	432
	ENSMUSG00000028716.15	Pdzk1ip1	0.924794	5.23507	96.7813	3.68693e-10	5.83809e-07	467	438	354	708	714	774
	ENSMUSG00000037129.7	Tmprss13	0.925877	5.61787	80.5459	1.88313e-08	1.18597e-05	591	591	459	811	922	1141
	ENSMUSG00000024846.6	Cst6	0.927571	6.72554	124.836	2.59832e-11	6.54553e-08	1316	1202	1020	1920	2161	2107
	ENSMUSG00000041660.8	Bbox1	0.935535	5.15267	96.339	3.86276e-10	5.9466e-07	422	405	354	672	646	761
	ENSMUSG00000069441.3	Dsg1a	0.942831	9.62465	86.1263	1.19121e-09	1.40464e-06	9502.93	8709.43	7975.09	13091.9	14766.3	18610.2
	ENSMUSG00000053746.8	Ptrh1	0.944058	3.32824	30.3408	1.58637e-05	0.00167145	146.39	109.04	76.88	159.84	201.11	225.29
	ENSMUSG00000060962.12	Dmkn	0.949338	9.76772	39.3363	0.000160214	0.00875661	10721	11188	7057	14209	17486	19716
	ENSMUSG00000050954.15	Zfp169	0.949351	3.36547	35.7057	2.85036e-06	0.00045656	113	96	127	168	198	236
	ENSMUSG00000044551.13	9930012K11Rik	0.951936	3.46408	40.3539	1.09751e-06	0.000233046	136	126	100	171	224	251
	ENSMUSG00000096255.2	Dynlt1b	0.952195	5.87343	97.1158	1.25607e-09	1.45027e-06	704.84	661.37	569.01	1254.41	1162.01	1016.18
	ENSMUSG00000062743.9	Zfp677	0.954067	3.05945	31.0147	8.08804e-06	0.000998323	76	92	102	159	146	180
	ENSMUSG00000061928.6	Dsg1b	0.95484	6.73701	77.451	2.8427e-07	8.75252e-05	1194.67	1166.05	1146.42	1723.71	1987.51	2583.74
	ENSMUSG00000039196.2	Orm1	0.955579	4.47566	44.3324	9.2587e-06	0.00111307	279.81	276.95	176.84	360.94	434.92	512.98
	ENSMUSG00000025813.14	Homer2	0.956186	5.76287	102.421	2.06523e-10	3.81524e-07	663.61	625.45	502.3	909.19	1063.27	1229.31
	ENSMUSG00000025885.18	Myo5b	0.959958	3.91596	48.6157	2.36215e-07	7.79598e-05	178	173	143	229	300	359
	ENSMUSG00000057899.6	Adgrf2	0.966547	2.64252	24.3378	4.22439e-05	0.00323817	79	69	54	96	108	160
	ENSMUSG00000024485.16	Slc4a9	0.968399	3.02931	33.7264	4.37961e-06	0.000626945	100	95	70	128	182	168
	ENSMUSG00000036062.13	Phf24	0.968758	3.79457	50.7471	1.63536e-07	5.96273e-05	175	154	124	236	262	318
	ENSMUSG00000091618.3	H60c	0.97616	5.64776	122.239	3.24938e-11	7.50349e-08	611.78	503.77	518.81	907.81	971.78	1083.77
	ENSMUSG00000015405.15	Ace2	0.980056	5.45744	48.5026	5.23491e-05	0.00377274	538	507	389	728	786	1091
	ENSMUSG00000073791.12	Efcab7	0.987334	2.1072	22.8138	6.36747e-05	0.00434081	41	48	47	73	85	92
	ENSMUSG00000034579.17	Pla2g3	0.988666	2.03108	22.0801	7.79699e-05	0.00502393	45.31	40.64	43.24	66.37	78.25	93.35
	ENSMUSG00000028488.15	Sh3gl2	0.998655	3.54357	42.1891	7.67438e-07	0.000180988	127	144	103	175	251	265
	ENSMUSG00000036395.15	Glb1l2	1.00302	3.57058	31.9201	3.9907e-05	0.00311945	146	128	107	162	238	306
	ENSMUSG00000044952.5	Kctd21	1.01473	2.69551	30.405	9.32366e-06	0.00111604	72	56	76	123	143	115
	ENSMUSG00000024957.9	Kcnk4	1.01815	1.79802	19.0495	0.000186836	0.00978698	44.38	30.12	34.16	56.39	61.97	84.03
	ENSMUSG00000030510.11	Cers3	1.01937	4.45467	55.3017	9.96739e-07	0.000218341	283	208	210	337	441	533
	ENSMUSG00000027171.10	Prrg4	1.02117	3.2436	39.9674	1.18494e-06	0.000245957	102	92	105	161	169	232
	ENSMUSG00000020566.19	Atp6v1c2	1.03341	4.76578	56.298	3.46354e-06	0.000524839	302	350	213	465	556	609
	ENSMUSG00000048721.2	Fndc9	1.03524	4.81149	72.8087	5.21636e-08	2.59115e-05	321	339	232	456	598	631
	ENSMUSG00000074625.10	Arhgap40	1.03711	3.66475	35.7419	2.21777e-05	0.00214944	144	161	96	191	266	302
	ENSMUSG00000091575.2	2010016I18Rik	1.04444	3.88168	65.3178	1.70223e-08	1.10987e-05	150.44	174.67	137.51	276.64	318.27	286.05
	ENSMUSG00000043681.5	Fam25c	1.04712	7.08313	65.475	1.02512e-05	0.00119106	1706	1519	1083	2241	2885	3051
	ENSMUSG00000108353.1	Gm45205	1.06614	2.50143	27.623	1.82222e-05	0.00185642	44.83	63.54	64.45	94.6	109.86	131.86
	ENSMUSG00000052180.15	Serpinb6c	1.06758	2.25682	29.322	1.20509e-05	0.00135907	45	54	47	89	99	95
	ENSMUSG00000078897.10	Gm4724	1.07872	2.64282	30.1437	9.91431e-06	0.00115972	46.96	72.75	69.59	112.59	134.99	125.06
	ENSMUSG00000043068.6	Fam89a	1.07874	3.36625	47.9704	2.64598e-07	8.3796e-05	117	120	82	170	217	234
	ENSMUSG00000033187.8	BC016579	1.08089	2.41367	30.8114	8.47921e-06	0.00104197	61	59	43	104	94	119
	ENSMUSG00000020646.17	Mboat2	1.08338	4.8504	89.4389	1.77715e-09	1.9312e-06	322	321	252	477	573	700
	ENSMUSG00000091376.1	Aadacl2	1.0941	3.83217	56.7428	7.62098e-08	3.35208e-05	182	149	109	271	257	333
	ENSMUSG00000035239.6	Neu3	1.09784	3.24226	53.3277	1.06242e-07	4.39404e-05	107	88	94	170	189	212
	ENSMUSG00000000248.16	Clec2g	1.10046	3.35036	48.657	2.34515e-07	7.79598e-05	106	107	98	154	218	246
	ENSMUSG00000024331.11	Dsc2	1.10245	3.10015	38.1754	2.09226e-06	0.000370463	79	93	88	126	173	220
	ENSMUSG00000019312.10	Grb7	1.1044	3.99218	81.3523	2.09119e-09	2.18671e-06	182	152	153	282	340	344
	ENSMUSG00000018907.10	Alox12e	1.10569	7.0976	148.185	4.0811e-12	1.41362e-08	1653	1435	1139	2648	2855	2837
	ENSMUSG00000037157.8	Il22ra1	1.10975	3.66949	70.3923	8.43774e-09	6.153e-06	141	133	114	228	272	272
	ENSMUSG00000002797.9	Ggct	1.11084	6.11024	87.5021	8.53601e-07	0.000195638	774	742	604	1124	1377	1725
	ENSMUSG00000035448.9	Ccr3	1.11155	1.83031	23.5034	5.27959e-05	0.00379507	41	37	28	64	61	86
	ENSMUSG00000036951.2	C130079G13Rik	1.11771	4.61103	89.6423	7.99216e-10	1.00667e-06	263.42	228.02	252.2	432.68	456.19	602.08
	ENSMUSG00000018862.11	Otop3	1.12335	3.91507	45.1324	9.12119e-06	0.00110132	182	176	102	261	299	360
	ENSMUSG00000050808.13	Muc15	1.12797	4.34795	79.704	2.8014e-09	2.77244e-06	226	199	192	369	360	515
	ENSMUSG00000050520.4	Cldn8	1.1291	1.94114	20.7612	0.000126575	0.0072319	39	29	45	56	69	105
	ENSMUSG00000040978.4	Gm11992	1.14288	4.33787	50.281	1.36164e-05	0.00149729	245	226	141	361	385	494
	ENSMUSG00000012350.15	Ehf	1.14851	5.13549	114.361	1.21341e-10	2.58648e-07	383	392	284	652	676	832
	ENSMUSG00000080115.3	Eef1akmt3	1.1486	1.74944	25.5088	3.1099e-05	0.00265978	35	33	30	56	67	78
	ENSMUSG00000117011.1	E130008D07Rik	1.15518	2.54072	38.9898	1.44153e-06	0.000286348	67	53	52	107	135	111
	ENSMUSG00000047854.5	Stx19	1.16679	2.23898	26.7559	2.28451e-05	0.00218293	49	53	36	63	100	124
	ENSMUSG00000067001.11	Serpinb7	1.16949	5.43316	52.6833	0.000119424	0.00695962	501	422	367	715	811	1149
	ENSMUSG00000034159.12	Mab21l4	1.17101	4.50141	92.0948	6.85386e-10	9.26457e-07	265	208	201	389	445	565
	ENSMUSG00000116207.1	Nnt	1.17732	3.94644	55.174	1.26286e-06	0.000257319	160.51	127.29	166.09	241.64	317.07	393.78
	ENSMUSG00000044626.13	Liph	1.18816	2.41869	35.9409	2.71113e-06	0.000444203	53	57	45	83	117	127
	ENSMUSG00000008461.6	Fut1	1.19131	3.77237	71.2893	7.48281e-09	5.75979e-06	145	139	117	225	278	343
	ENSMUSG00000055561.9	Spink5	1.19956	7.19215	126.622	3.09971e-09	2.91168e-06	1594	1457	1253	2425	3039	3660
	ENSMUSG00000047884.6	Klk9	1.19977	3.41886	38.6359	2.1527e-05	0.00210414	132	117	65	177	232	253
	ENSMUSG00000103839.1	Gm37607	1.20258	1.80005	25.9791	2.75569e-05	0.00247525	39	25	35	57	71	83
	ENSMUSG00000067219.9	Nipal1	1.2099	4.22965	39.1403	0.000180339	0.0095686	221	190	138	305	352	512
	ENSMUSG00000045319.13	Proser2	1.21364	2.48317	36.8318	2.24674e-06	0.000390677	50	61	49	91	109	144
	ENSMUSG00000025665.16	Rps6ka6	1.22283	2.91901	43.7449	5.71086e-07	0.000145853	73	82	62	117	149	203
	ENSMUSG00000036492.12	Rnf39	1.22421	4.39532	48.3896	4.91489e-05	0.00360302	233	238	141	386	395	532
	ENSMUSG00000028544.14	Slc5a9	1.22642	4.8672	152.568	2.96557e-12	1.0957e-08	304	289	252	540	637	646
	ENSMUSG00000028386.1	Slc46a2	1.23868	4.07377	59.4325	1.87565e-06	0.000343848	186	174	125	258	365	433
	ENSMUSG00000030693.10	Klk10	1.24664	3.94145	88.009	9.60512e-10	1.16915e-06	162	139	138	257	328	378
	ENSMUSG00000109877.1	Gm45609	1.24881	1.62601	23.7253	4.97358e-05	0.00362625	39.85	26.71	19	49.89	63.83	74.06
	ENSMUSG00000025582.4	Nptx1	1.25091	3.49277	75.7638	4.17816e-09	3.85929e-06	126	101	94	232	216	254
	ENSMUSG00000048775.10	Serpinb13	1.25767	2.40724	35.9978	2.67858e-06	0.000441814	52	60	37	88	103	138
	ENSMUSG00000056078.6	Lipm	1.27027	6.03509	128.701	2.01386e-08	1.25405e-05	656.86	634.92	567.94	1115.92	1324.13	1708.31
	ENSMUSG00000070868.11	Skint3	1.28036	4.71727	125.502	2.45506e-11	6.47915e-08	297	242	205	497	521	643
	ENSMUSG00000056043.5	Rgs9bp	1.29413	0.973199	19.2425	0.000176388	0.00942683	20	20	12	30	41	47
	ENSMUSG00000029832.16	Nfe2l3	1.30953	3.79171	45.4143	3.44143e-05	0.00282047	136	145	103	200	304	377
	ENSMUSG00000078963.3	Hsbp1l1	1.32702	1.6573	23.8392	5.49267e-05	0.00391775	25	37	22	40	78	78
	ENSMUSG00000071561.2	Cstdc5	1.32752	4.72158	71.2579	5.71126e-06	0.000759049	273.74	286.76	168.89	600.66	538.35	535.71
	ENSMUSG00000047787.8	Flrt1	1.33305	2.2459	34.7961	3.46603e-06	0.000524839	40	59	29	80	111	107
	ENSMUSG00000111837.1	Gm47135	1.33499	1.1754	22.3723	7.18992e-05	0.00471565	22	17	20	39	38	61
	ENSMUSG00000045871.5	Slitrk6	1.34536	4.40771	58.3427	2.2465e-05	0.00216152	190	152	233	380	447	531
	ENSMUSG00000048482.14	Bdnf	1.35184	1.96615	38.4134	1.62047e-06	0.000308618	42	32	30	69	82	94
	ENSMUSG00000038751.5	Ptk6	1.35587	3.79552	87.9186	9.70406e-10	1.16915e-06	143	136	98	260	270	358
	ENSMUSG00000034607.6	Pof1b	1.35721	7.0536	102.966	2.02795e-06	0.000362757	1323	1247	1048	2428	2509	3609
	ENSMUSG00000031089.7	Slc6a14	1.36121	3.72421	50.8941	1.26699e-05	0.00140853	145	138	76	262	248	335
	ENSMUSG00000078598.11	Skint5	1.36189	2.3635	44.4981	4.96176e-07	0.000129101	49	47	41	84	105	137
	ENSMUSG00000054905.2	Stfa3	1.37324	4.73787	170.759	8.53225e-13	4.12935e-09	278	217	224	528	610	577
	ENSMUSG00000020062.7	Slc5a8	1.38135	1.81413	34.4742	3.71713e-06	0.000555275	36	33	23	64	66	91
	ENSMUSG00000048766.6	Skint10	1.40327	2.54071	45.5456	4.09091e-07	0.000111139	63	56	34	107	110	155
	ENSMUSG00000114452.1	A530001N23Rik	1.40595	0.919182	20.6085	0.00011826	0.00691358	17	10	20	31	41	44
	ENSMUSG00000096780.7	Tmem181b-ps	1.41139	4.72824	183.866	3.72962e-13	2.06699e-09	232.35	233.74	231.7	512.59	592.06	611.9
	ENSMUSG00000030666.11	Calcb	1.42066	1.06617	21.0489	0.000104243	0.00632085	16	19	17	24	55	51
	ENSMUSG00000005339.10	Fcer1a	1.42373	2.043	46.4658	3.46129e-07	0.000100434	41	34	31	85	90	87
	ENSMUSG00000110404.1	Rnf223	1.43473	2.53609	43.3835	1.21389e-06	0.000249168	61	56	33	88	133	153
	ENSMUSG00000078879.10	Zfp973	1.43767	1.44349	26.2272	2.58665e-05	0.00236169	24.65	13.33	30.04	53.89	58.38	58.84
	ENSMUSG00000116895.1	Gm3435	1.44126	1.66496	30.4193	9.29251e-06	0.00111472	30	25.62	24.48	55.25	95.48	50.65
	ENSMUSG00000024922.2	Ovol1	1.46444	5.58211	76.7944	5.17596e-05	0.00373816	490.73	409.3	337.83	776.41	1104.4	1271.01
	ENSMUSG00000049972.4	Skint9	1.47052	4.17563	106.063	2.37742e-09	2.43998e-06	205	133	127	348	376	459
	ENSMUSG00000029134.14	Plb1	1.508	2.87824	51.2901	1.26289e-06	0.000257319	62	69	52	106	161	216
	ENSMUSG00000085236.3	2610206C17Rik	1.52351	1.4091	29.1559	1.25406e-05	0.00140123	29	21	14	39	60	71
	ENSMUSG00000116659.1	Gm6551	1.53656	3.09142	73.2293	5.79302e-09	4.7214e-06	76.58	77.63	55.24	141.05	183.77	237.83
	ENSMUSG00000114780.1	AI197445	1.56024	0.798366	21.4437	9.31987e-05	0.00575827	19	9	12	35	25	49
	ENSMUSG00000026984.4	Il1f6	1.56506	2.62995	39.561	2.34773e-05	0.00221964	55	65	30	125	107	176
	ENSMUSG00000079710.10	Gm3448	1.59302	1.4962	30.3937	1.05329e-05	0.0012136	18.3	16.19	30.77	54.35	78.05	51.11
	ENSMUSG00000043230.2	Fam124b	1.60219	1.87232	38.8311	1.72384e-06	0.000324955	22	30	33	75	59	106
	ENSMUSG00000076612.8	Ighg2c	1.61271	1.05774	29.1092	1.26822e-05	0.00140853	16	12	19	53	38	42
	ENSMUSG00000074489.9	Bglap3	1.63153	4.64329	188.654	2.79243e-13	1.90179e-09	236.15	204.86	150.56	485.64	579.7	620.18
	ENSMUSG00000054083.8	Capn12	1.63426	2.08747	28.4331	0.00018956	0.00987598	38.33	30.69	29.04	50.3	94.14	139.33
	ENSMUSG00000051251.3	Nhlh1	1.65483	1.6508	46.6467	3.35025e-07	9.96945e-05	27	24	20	55	74	78
	ENSMUSG00000104350.1	Gm38244	1.65837	2.03895	48.8877	2.2525e-07	7.61195e-05	29	24	40	83	80	110
	ENSMUSG00000037469.10	Acp7	1.66367	3.04504	65.9513	2.98638e-07	9.14409e-05	78.78	70.32	41.83	146	170.95	240.39
	ENSMUSG00000078896.11	Zfp965	1.676	0.915562	25.5799	3.05329e-05	0.00263167	9.74	20.48	11.26	51.5	31.55	36.7
	ENSMUSG00000085020.1	2310081O03Rik	1.71656	0.491623	21.9008	8.19677e-05	0.00519763	5	14	10	30	27	32
	ENSMUSG00000116710.1	Gm6557	1.72625	3.17995	100.485	2.51247e-10	4.49173e-07	85.16	68.36	50.3	172.5	199.11	246.35
	ENSMUSG00000110386.1	Gm42031	1.75552	5.25703	199.901	6.13768e-10	8.5039e-07	264.86	250.97	324.03	870.35	945.26	810.56
	ENSMUSG00000030994.16	D7Ertd443e	1.75617	0.511398	24.1959	4.38634e-05	0.0032868	14	5	10	27	32	32
	ENSMUSG00000044103.4	Il1f9	1.76538	4.41779	67.6089	7.76743e-05	0.00501199	184	184	104	422	440	612
	ENSMUSG00000029680.2	Hyal4	1.79244	0.490458	27.0157	2.11968e-05	0.00208658	10	11	7	31	25	34
	ENSMUSG00000066867.8	Oas1e	1.79599	0.124939	21.3887	9.4659e-05	0.005829	6	10	5	23	24	21
	ENSMUSG00000038094.15	Atp13a4	1.83415	1.94618	60.1433	3.63267e-08	1.99333e-05	31	30	19	81	74	108
	ENSMUSG00000108985.1	A930030B08Rik	1.84838	1.11601	31.8378	8.59183e-06	0.00104883	12	9	22	40	41.9	63
	ENSMUSG00000085004.2	5430427M07Rik	1.86086	1.13981	30.4097	1.9358e-05	0.00194463	18	20	6	34	50	64
	ENSMUSG00000060201.5	Spink7	1.8631	1.21191	37.689	1.88009e-06	0.000343848	12	21	13	39	47	70
	ENSMUSG00000046490.7	Rnf222	1.86434	2.68829	45.3941	4.08093e-05	0.00317208	43	61	29	113	129	206
	ENSMUSG00000026985.1	Il1f8	1.86607	3.36627	55.6217	4.5404e-05	0.00338672	90	83	42	182	235	304
	ENSMUSG00000073485.3	H3f3aos	1.8663	-0.0900878	20.3629	0.000126951	0.00723874	5	6	6	22	20	16
	ENSMUSG00000022229.3	Atp12a	1.94122	2.16235	78.9828	2.79156e-09	2.77244e-06	34	32	21.93	89.87	97.91	123.91
	ENSMUSG00000034359.16	Skint2	1.95334	0.512754	28.1064	1.61769e-05	0.00169799	7	12	7	28	23	43
	ENSMUSG00000044359.1	P2ry4	1.96339	0.658224	36.374	2.47362e-06	0.00041417	12	10	7	32	35	38
	ENSMUSG00000037263.13	Aldh3b3	1.99882	2.69406	98.1003	3.21193e-10	5.56276e-07	45.63	44.17	34.02	111.82	149.78	196.78
	ENSMUSG00000087263.1	Gm15726	2.02142	1.19965	48.54	2.39368e-07	7.84972e-05	13.56	18.89	9.08	47.5	54.56	55.17
	ENSMUSG00000063767.4	S100a7a	2.0557	1.30275	30.8948	6.95119e-05	0.00460265	11	16	17	28	59	85
	ENSMUSG00000103523.1	2210017I01Rik	2.09972	2.9347	76.1259	1.06448e-06	0.000228087	44	66	29	157	165	228
	ENSMUSG00000024653.2	Scgb1a1	2.15336	0.0346346	24.6787	3.86094e-05	0.00304811	6	7	3	14	21	32
	ENSMUSG00000101257.1	2310015K22Rik	2.15463	1.54121	71.7475	7.0406e-09	5.57424e-06	20	15	15	66	67	73
	ENSMUSG00000105263.1	Gm42427	2.24293	2.25934	92.4477	5.86378e-10	8.33273e-07	18.12	34.35	27.15	103.03	110.2	134.67
	ENSMUSG00000054753.9	AU018091	2.30258	-0.0285773	21.924	0.000113263	0.00669208	9	3	2	12	20	33
	ENSMUSG00000093880.3	Tmem181c-ps	2.4938	0.211004	31.2858	7.59654e-06	0.000949591	4.04	1.76	8.98	25.29	20.47	34.59
	ENSMUSG00000035299.16	Mid1	2.6268	7.74486	506.384	2.03602e-13	1.72277e-09	1110.75	1012.99	782.64	4604.31	6545.96	5370.98
	ENSMUSG00000095134.2	Mid1-ps1	2.6507	0.813882	37.3567	1.93216e-05	0.00194463	8.79	10.48	3.21	52.41	53.86	22.41
	ENSMUSG00000038598.9	Shoc1	2.6625	-0.304713	22.2814	0.000104017	0.00631404	4	5	0	21	12	21
	ENSMUSG00000106143.1	Gm43735	2.67753	-0.158821	33.085	5.0498e-06	0.000703178	3	5	2	16	19	26
	ENSMUSG00000046259.2	Sprr2h	2.74551	2.66633	92.9105	8.11526e-07	0.000188973	31	30	18	119	133	239
	ENSMUSG00000045331.3	2310079G19Rik	2.75992	2.5524	142.703	1.21325e-11	3.53894e-08	23	26	23	144	109	199
	ENSMUSG00000076613.4	Ighg2b	3.41403	2.99957	214.172	2.89524e-11	6.97641e-08	25	24	17	259	154	234
	ENSMUSG00000050092.3	Sprr2b	3.61853	2.99731	104.396	1.49551e-05	0.00160005	29	21	8	165	203	291
	ENSMUSG00000050201.9	Otop2	3.75207	0.434509	48.139	3.36352e-06	0.000513525	2	2	4	16	30	59
	ENSMUSG00000058725.1	Gm11937	3.90697	-0.982687	20.0283	0.000188512	0.00986036	1.27	0	1.31	3.14	9.44	20.65
	ENSMUSG00000068078.4	2310034C09Rik	3.92698	2.40256	223.68	4.02195e-14	5.57251e-10	13	8	10	143	108.81	186.53
	ENSMUSG00000090515.2	Krtap27-1	3.93519	-0.248924	37.3965	4.63635e-06	0.000655487	1	2	1	10	14	38
	ENSMUSG00000078261.1	Gm11596	4.11627	-0.836479	24.5001	5.9191e-05	0.00413152	2	0	0	5	12	21
	ENSMUSG00000068073.2	1110025L11Rik	4.11893	3.28813	352.999	2.07738e-14	4.4851e-10	17.58	19.01	13.5	201.28	260.58	364.39
	ENSMUSG00000064165.8	Krt39	4.15499	0.411769	60.1937	2.16375e-07	7.44826e-05	3	2	1	21	24	60
	ENSMUSG00000114203.1	Gm35279	4.18911	-1.36725	19.3942	0.000168614	0.00911685	1	0	0	6	7	10
	ENSMUSG00000057855.2	Krtap6-3	4.25376	1.27901	135.391	1.08824e-11	3.35062e-08	5	3	3	57	51	92
	ENSMUSG00000009047.4	Gm5965	4.28102	1.53217	170.043	8.94105e-13	4.12935e-09	3.01	5	5.09	75.75	67.22	96.51
	ENSMUSG00000069718.4	Gm11563	4.30547	1.06557	97.8775	3.02662e-09	2.89204e-06	3	4	2	31	54	87
	ENSMUSG00000089724.1	Krtap4-8	4.33747	0.578043	53.0082	6.60677e-06	0.000845621	1	3	2	17	35.68	66.56
	ENSMUSG00000050224.3	Krtap13	4.41952	1.84965	195.211	1.8984e-13	1.72277e-09	6.99	5	2.5	86.84	81.93	134.09
	ENSMUSG00000075567.4	Krtap1-4	4.59791	-0.0257395	49.5001	9.26377e-07	0.000207857	1	1	1	10	22	44.16
	ENSMUSG00000058368.3	Krtap21-1	4.67806	2.62856	76.9869	0.000178322	0.00951181	9	8	5	93	163	276
	ENSMUSG00000044649.4	Krtap4-2	4.72966	0.423763	68.932	7.05826e-08	3.20636e-05	1	1	2	18	30	60
	ENSMUSG00000050704.3	2310061N02Rik	4.83788	1.21663	62.3155	2.77516e-05	0.00248468	4	3	0	41	50	104
	ENSMUSG00000051481.5	Krtap31-2	4.84993	-0.892601	23.3891	0.000147783	0.00821652	0	0	1	3.78	8.22	25.37
	ENSMUSG00000045109.6	Krtap4-7	4.9056	1.76411	105.377	8.08915e-07	0.000188973	2	3	5	49	102	139
	ENSMUSG00000078131.1	Krtap1-3	5.05357	1.42337	63.8464	4.80554e-05	0.00355103	2	4	1	34	73	121
	ENSMUSG00000062400.3	Krtap6-5	5.13541	2.70788	140.651	3.0249e-06	0.000474909	5	7	5	106.01	187.37	274.53
	ENSMUSG00000063251.6	Krtap4-1	5.36824	1.89691	85.1506	2.44944e-05	0.0022777	3	3	2	51.78	99	171.47
	ENSMUSG00000078262.5	Krtap4-9	5.66119	0.448054	66.8757	7.31804e-07	0.000176293	0	1	1	22	25	65
	ENSMUSG00000062433.3	Krtap6-2	5.67268	2.85552	95.4829	0.000135821	0.00768098	4	3	6	109	216	311
	ENSMUSG00000075566.2	Krtap4-6	5.69294	0.480261	49.3496	3.63251e-05	0.00292612	0	1	1	13.22	41.4	61.19
	ENSMUSG00000078130.4	Gm11555	5.81396	-1.53776	20.3151	0.000152411	0.00842993	0	0	0	3	7	10
	ENSMUSG00000048830.3	2310057N15Rik	5.98212	1.21402	147.05	2.38443e-11	6.47915e-08	0	1	2.41	55.42	50.04	92.88
	ENSMUSG00000068071.2	Gm6358	6.08243	-1.36632	25.6911	3.71982e-05	0.00297505	0	0	0	8	5	11
	ENSMUSG00000078254.1	Krtap29-1	6.56409	-1.01334	29.961	3.62661e-05	0.00292563	0	0	0	3	14	17
	ENSMUSG00000069717.7	Gm11568	7.02717	0.974128	98.4378	1.74482e-07	6.27919e-05	0	1.38	0	31.68	44.54	91.37

## Sheet: c IPA Dis&Function of 1073 DEGs
IPA Diseases and Functions using Direct and Indirect interactions for the 1073 DEGs from b (feet from Gzma-/-+CHIKV vs 6J+CHIKV) ; showing annotations with z-scores less than -2 indicating clear decrease in activity	Categories	Diseases or Functions Annotation	p-value	Predicted Activation State	Activation z-score	Molecules	# Molecules
	Cellular Movement	Invasion of breast cancer cell lines	1.3e-06	Decreased	-3.968	ABL2,AXL,CCL19,CCL21,CCN1,CDCP1,CDH2,CEBPD,COL2A1,CRTAP,CST6,CTSK,EPHB6,ERBB3,GATA3,GIT1,HBP1,ITGB3,LCN2,LOXL2,MCAM,MMP14,MMP2,MMP9,MTA1,NFATC4,NUMBL,PARVA,PARVB,PDCD4,PIK3CB,PPIC,RB1,RHOC,RORA,SERPINB5,SERPINH1,SNAI2,SPARC,TCF4,TP63,TRIP10,VIM	43
	Cellular Movement,Immune Cell Trafficking	Leukocyte migration	1.93e-12	Decreased	-3.519	ACE2,ACKR1,ADGRG3,ADORA1,AXL,BCL11B,BGN,C1QTNF6,C2,CAMP,CCL19,CCL21,CCN1,CCN2,CCR3,CD19,CD276,CD34,CDCP1,CEBPA,CHST2,COCH,COL4A1,CSF1,CTSG,CTSK,CXADR,CXCL14,CYP1A1,CYP2J2,DPEP1,Ear2 (includes others),EGFL7,EGLN3,ELANE,ELN,ENG,EPCAM,ESAM,FABP5,FCER1A,FCN1,FGFR1,FLT4,GATA3,GIT1,GLIS2,GNAI3,GRB7,HBEGF,HYAL4,IGF2,Ighd,Ighg2b,IGHM,IL18,IL36A,IRF6,ITGA2B,ITGB3,KLF2,KPNA4,LAMA4,LBP,LCN2,LSP1,Ly6a (inclu…	121
	Dermatological Diseases and Conditions,Organismal Injury and Abnormalities	Abnormality of skin morphology	3.88e-09	Decreased	-3.391	ABHD5,ACTA2,ALOX12,CD34,CERS3,CLDN1,COCH,COL3A1,DSC2,DSC3,DSG1,DSG3,DSP,Dst,ELANE,ELOVL3,ERG,FA2H,FAR2,FBN1,FERMT1,FGFR1,FLT4,IDE,IL36A,KANK2,KRT1,Krt10,MMP9,PDCD4,PDGFRA,PDGFRB,PER1,PERP,PLAT,PNPLA1,PRKCG,RB1,SCEL,SERPINB13,SERPINB7,SERPINB8,SGPP1,SNAI2,SPINK5,TRPV3,VIM	47
	Cellular Movement	Cell movement of blood cells	7.81e-13	Decreased	-3.366	ACE2,ACKR1,ADGRG3,ADORA1,AXL,BCL11B,BDNF,BGN,C1QTNF6,C2,CAMP,CCL19,CCL21,CCN1,CCN2,CCR3,CD19,CD276,CD34,CDCP1,CEBPA,CHST2,COCH,COL4A1,CSF1,CTSG,CTSK,CXADR,CXCL14,CYP1A1,CYP2J2,DPEP1,Ear2 (includes others),EGFL7,EGLN3,ELANE,ELN,ENG,EPCAM,ESAM,FABP5,FCER1A,FCN1,FGFR1,FLT4,GATA3,GIT1,GLIS2,GNAI3,GRB7,HBEGF,HYAL4,IGF2,Ighd,Ighg2b,IGHM,IL18,IL36A,IRF6,ITGA2B,ITGB3,KLF2,KPNA4,LAMA4,LBP,LCN2,LSP1,Ly6a (…	123
	Skeletal and Muscular System Development and Function	Mineralization of bone	2.42e-06	Decreased	-3.102	Acp5,BGLAP,CCN1,CD276,CLEC3B,COL2A1,COMP,CREB3L1,CRTAP,CSF1,DMP1,EBF1,FAM20C,HSPG2,MGP,MMP13,MMP14,NOS3,OSR2,PDLIM7,PKDCC,PTH1R,RUNX2,S1PR1,TGFB3	25
	Cellular Movement,Hematological System Development and Function,Immune Cell Trafficking	Cell movement of leukocytes	3.89e-10	Decreased	-3.018	ACE2,ACKR1,ADORA1,AXL,BCL11B,BGN,C1QTNF6,C2,CAMP,CCL19,CCL21,CCN1,CCN2,CCR3,CD19,CD276,CDCP1,CEBPA,CHST2,COL4A1,CSF1,CTSG,CTSK,CXADR,CXCL14,CYP2J2,DPEP1,Ear2 (includes others),EGFL7,EGLN3,ELANE,ELN,ENG,FABP5,FCER1A,FCN1,GATA3,GIT1,GLIS2,GNAI3,Ighd,Ighg2b,IL18,IL36A,IRF6,ITGB3,KLF2,KPNA4,LAMA4,LBP,LCN2,LSP1,Ly6a (includes others),LYST,MCAM,MICOS10-NBL1/NBL1,MMP14,MMP2,MMP9,MYLK,NFIL3,NOS3,NR4A1,NT…	99
	Cellular Movement,Hematological System Development and Function,Immune Cell Trafficking,Inflammatory Response	Cell movement of phagocytes	1.53e-06	Decreased	-2.899	ACE2,ACKR1,ADORA1,AXL,C1QTNF6,C2,CAMP,CCL19,CCL21,CCN1,CCN2,CCR3,COL4A1,CSF1,CTSG,CTSK,CXADR,CXCL14,CYP2J2,DPEP1,Ear2 (includes others),EGLN3,ELANE,ELN,ENG,FCN1,GIT1,GLIS2,GNAI3,Ighg2b,IL18,IL36A,IRF6,ITGB3,KPNA4,LBP,LCN2,LSP1,MCAM,MICOS10-NBL1/NBL1,MMP14,MMP9,MYLK,NTN1,P2RY4,PECAM1,PIK3CB,PLAT,PRDM1,Prss34,RB1CC1,RORA,S1PR1,S1PR3,SERPING1,SGPP1,SLIT2,SLIT3,SOD3,SRF,THBS1,THBS2,THBS4,TIMP2,TNFSF1…	67
	Cell Morphology,Cellular Assembly and Organization,Cellular Function and Maintenance	Formation of cellular protrusions	1.43e-07	Decreased	-2.831	ABL2,ABLIM1,ACE,ACKR1,ADGRA2,ADGRF5,AKAP12,AQP1,ARHGAP32,BCL11A,BCL11B,BDNF,BOC,CAPNS1,CCL19,CCL21,CCN1,CCN2,CDH2,CENPF,CHL1,CRIP1,CSF1,CUL4B,DBN1,DNM1,Dst,DYNLT1,EFNA3,ENG,EPHA4,EPHB3,EPHB6,FARP1,FGFR1,FHDC1,FLRT1,FLRT3,GATA3,GEM,GIT1,IL18,ITGB3,KLF5,KLK8,LAMB2,LAMC1,LCN2,LPAR1,MAP3K1,MBP,MFSD2A,MICOS10-NBL1/NBL1,MID1,MPZ,MRAS,MYO5B,NCK1,NEU3,NFATC4,NPR2,NR4A1,NSMF,NTN1,NUMBL,PAK3,PARVA,PARVB,PD…	103
	Dermatological Diseases and Conditions,Organismal Injury and Abnormalities	Blister	4.06e-07	Decreased	-2.813	DSC3,DSG1,DSG3,Dst,ELANE,FERMT1,Krt10,MMP9,PDGFRA,PERP,PLAT	11
	Cell-To-Cell Signaling and Interaction	Adhesion of connective tissue cells	5.69e-09	Decreased	-2.749	ADGRA2,AKAP12,CCN1,CCN2,CDH2,COL2A1,CSF1,CXCR6,DLC1,DNM1,IGF2,ITGB3,JAG1,LTBP2,MAP3K1,MFSD2A,MMP2,NCK1,NTN1,PMP22,RAMP2,RUNX2,SERPINB5,SPARC,THBS2,THY1,TIMP2,TMEM123	28
	Tissue Morphology	Degradation of extracellular matrix	3.05e-07	Decreased	-2.748	CTSK,ELANE,FLOT2,HBEGF,KLF5,MMP13,MMP14,MMP2,MMP9,SOD3,TGFB1I1	11
	Embryonic Development,Organismal Development	Development of head	3.88e-08	Decreased	-2.601	ABL2,ADAM19,ADGRA2,AKTIP,APBB2,AQP1,AXL,BCL11B,BDNF,CDC14B,CDH2,CDK5RAP1,CEBPA,CEBPD,CHL1,CHST3,CLDN5,COCH,COL10A1,COL18A1,COL2A1,COL3A1,COL4A1,COL5A1,COL5A2,COL8A2,CSF1,CTSK,CXADR,CXCL14,DBI,DHCR7,DLC1,DMP1,DSP,EBF1,EDARADD,EFNA3,EGLN3,EML1,EPHA4,EPHB3,FAM20C,FBN1,FGFR1,FLRT3,FLT4,FUT1,FZD6,GATA3,GRHL2,GRHL3,HSPG2,IFI16,IGF2,IGFBP7,IRF6,JAG1,KIF1A,KLF2,LAMB2,LAMC1,LCN2,LTBP2,MAF,MAP3K1,MFSD2A,MI…	112
	Embryonic Development,Organismal Development	Development of body axis	6.07e-07	Decreased	-2.601	ABL2,ADAM19,ADGRA2,AKTIP,APBB2,AQP1,AXL,BCL11B,BDNF,CDC14B,CDH2,CDK5RAP1,CEBPA,CEBPD,CHL1,CHST3,CLDN5,COCH,COL10A1,COL18A1,COL2A1,COL3A1,COL4A1,COL5A1,COL5A2,COL8A2,CSF1,CTSK,CXADR,CXCL14,DBI,DHCR7,DLC1,DMP1,DSP,EBF1,EDARADD,EFNA3,EGLN3,EML1,EPHA4,EPHB3,FAM20C,FBN1,FGFR1,FLRT3,FLT4,FUT1,FZD6,GATA3,GRHL2,GRHL3,HSPG2,IFI16,IGF2,IGFBP7,IRF6,JAG1,KIF1A,KLF2,LAMB2,LAMC1,LCN2,LTBP2,MAF,MAP3K1,MFSD2A,MI…	113
	Connective Tissue Development and Function,Skeletal and Muscular System Development and Function,Tissue Development	Ossification of bone	2.73e-06	Decreased	-2.588	Acp5,BGN,CCN2,COL2A1,CREB3L1,CRTAP,DCHS1,DMP1,EBF1,FSTL1,HSPG2,IGF2,Ly6a (includes others),MGP,MMP13,MMP14,MMP2,MMP9,PDGFRA,PLK2,PRRX2,RUNX2,THBS3	23
	Embryonic Development,Organ Development,Organismal Development,Respiratory System Development and Function,Tissue Development	Alveologenesis of lung	2.61e-07	Decreased	-2.563	CEBPA,ELN,ERRFI1,FBN1,HBEGF,MMP14,MMP2,PECAM1,RCN3,TGFB3	10
	Embryonic Development,Organismal Development	Development of body trunk	2.63e-12	Decreased	-2.537	Acan,ACE,ACE2,ADAM19,ADAMTS2,ADGRF5,AEBP1,AKAP12,AQP1,ATP12A,AXL,BCL11B,BDNF,BGLAP,BICC1,CACNA1C,CAPNS1,CCL19,CCN1,CCN2,CDKN2B,CEBPA,CEBPD,CEBPG,CENPF,COL2A1,COL3A1,COL5A1,CRIP1,CSF1,CSRP3,CTSK,CXADR,CXCL14,DAAM1,DCHS1,DGAT1,DHCR7,DLC1,DRAP1,DSC2,DSP,ELN,EMILIN1,ENG,EPCAM,EPHB3,ERBB3,ERG,ERRFI1,FBN1,FGFR1,FLRT3,FLT4,FOXN1,FOXP4,FSTL1,GATA3,GEM,GIT1,GJC1,GLIS2,GRHL2,HBB,HBEGF,HSPG2,IFI16,IGF2,IGFB…	143
	Cellular Movement	Cell movement of myeloid cells	4.12e-07	Decreased	-2.471	ACE2,ACKR1,ADORA1,C1QTNF6,C2,CAMP,CCL19,CCL21,CCN1,CCN2,CCR3,COL4A1,CSF1,CTSG,CTSK,CXADR,CXCL14,CYP2J2,DPEP1,EGLN3,ELANE,ELN,ENG,FCN1,GIT1,GLIS2,GNAI3,Ighg2b,IL18,IL36A,IRF6,ITGB3,KPNA4,LBP,LCN2,LSP1,MCAM,MICOS10-NBL1/NBL1,MMP14,MMP9,MYLK,NR4A1,NTN1,P2RY4,PECAM1,PIK3CB,PLAT,PRDM1,Prss34,RB1CC1,RORA,S1PR1,SCGB1A1,SERPING1,SGPP1,SLIT2,SLIT3,SOD3,SPON2,SRCIN1,SRF,THBS1,THBS2,THBS4,TIMP2,TNFSF12,TPSA…	68
	Cellular Movement	Chemotaxis	3.17e-11	Decreased	-2.467	ACKR1,ADGRA2,ADORA1,AKAP12,AXL,BDNF,BRMS1,CAMP,CCL19,CCL21,CCN1,CCN2,CCR3,CDCP1,CSF1,CTSG,CXADR,CXCL14,DPEP1,Ear2 (includes others),ECSCR,ELANE,ELN,ENG,ERBB3,FBN1,GIT1,GNAI3,HBEGF,IGF2,IL18,ITGB3,LBP,LCN2,LPAR1,LSP1,LYST,MAP3K1,MMP14,MMP2,MMP9,MRGPRX2,MYLK,MYO5B,NCK1,NOS3,NPTX1,NR4A1,NTN1,PDGFRA,PDGFRB,PIK3CB,PLAT,PLXNA3,PRKCG,RADIL,RALBP1,Retnlg,S1PR1,S1PR3,SEMA3B,SERPINH1,SGPP1,SLIT2,SLIT3,SNAI…	76
	Cell-To-Cell Signaling and Interaction	Binding of blood cells	4.26e-06	Decreased	-2.46	ACKR1,ADORA1,ADRA2A,ALOX12,ATP2A3,AXL,CACNA1C,CAMP,CCL19,CCL21,CCN1,CCR3,CD34,CERCAM,CSF1,CTSG,ELANE,ENG,EPHA4,ERG,GP5,HSPG2,HYAL4,IGHM,IL18,ITGA2B,ITGB3,LBP,LSP1,Ly6a (includes others),MCAM,MRAS,NOS3,NPTX1,NTN1,PECAM1,PER1,RASGRP1,RASGRP2,SERPING1,SERPINH1,SLC4A1,SLIT2,SPON2,THBS1,THBS2,THY1,TNFSF12,VAV3	49
	Cancer,Organismal Injury and Abnormalities	Advanced extracranial solid tumor	1.58e-08	Decreased	-2.421	ABL2,ACTA2,AKAP12,AXL,C1R,CCL19,CCL21,CCN1,CCN2,CD248,CDH2,CEBPD,COL15A1,COL4A1,COL4A2,COL6A3,CRABP2,CRYBG1,CSF1,CTSG,EGFL7,ELANE,ENG,EPHB6,ERBB3,FGFR1,FLT4,HTRA1,IGFBP4,IGFBP7,IL18,IL22RA1,ITGB3,ITPR3,JAG1,KCNK6,KLK10,LCN2,LRRC17,MCAM,MFAP5,MMP14,MMP2,MMP9,MYBPH,OLFML3,P2RY1,PCOLCE,PDGFRA,PDGFRB,PIK3CB,PLAT,PLPP3,PRRX2,PTK6,RASSF9,RHOC,RNF144B,S1PR1,SCD,SCGB1A1,SERPING1,SH3GL2,SLIT2,SNAI2,SND1,S…	74
	Cellular Movement	Migration of cells	6.43e-25	Decreased	-2.297	ABHD6,ABL2,Acan,ACE2,ACKR1,ACTA2,ADAM19,ADAM33,ADGRA2,ADGRF5,ADGRG3,ADORA1,ADRA2A,AKAP12,ALOX12,APBB2,AQP1,AXL,BCL11B,BDNF,BGN,BICD2,BRMS1,C1QTNF6,C2,CALML3,CAMP,CAMSAP3,CAPNS1,CCL19,CCL21,CCN1,CCN2,CCR3,CD19,CD248,CD276,CD34,CDCP1,CDH2,CEBPA,CEBPD,CENPF,CHL1,CHST2,CLDN1,CLDN5,COCH,COL18A1,COL3A1,COL4A1,COL4A2,COL6A1,COMP,CREB3L1,CSF1,CST6,CTSG,CTSK,CXADR,CXCL14,CYGB,CYP1A1,CYP2J2,DBN1,DLC1,DMP1,…	262
	Cardiovascular System Development and Function,Organismal Development	Vasculogenesis	1.02e-17	Decreased	-2.269	ACE2,ADAMTS2,ADCY6,ADGRA2,ADRA2A,ALOX12,AXL,BDNF,BRMS1,CAMP,CAPNS1,CCN1,CCN2,CCR3,CD276,CD34,CDH2,CDKN2B,CEBPD,COL15A1,COL18A1,COL4A1,COL4A2,COL8A2,COMP,CSF1,CXCL14,CYGB,DAAM1,DMP1,DRAP1,ECSCR,ECT2,EFEMP2,EGFL7,EGLN3,ELN,ENG,EPHB3,ERG,ESAM,FBLN5,FGFR1,FLT4,FOXN1,FSTL1,FUT1,GADD45A,GEM,GJC1,HAS1,HBEGF,HSPG2,HTRA1,IFI16,IGF2,IGFBP4,IGFBP7,IL18,ITGB3,JAG1,KLF2,KLF5,KRT1,LCN2,LOXL2,LRG1,LTBP1,MCAM,MG…	121
	Cell Morphology,Tissue Development	Tubulation of cells	3.37e-06	Decreased	-2.247	ALOX12,AXL,CCN1,CSRP3,ECSCR,ENG,ERG,ESAM,MGP,MMP13,MMP2,NR4A1,PECAM1,PRKCG,RHOJ,S1PR1,S1PR3,SEMA3B,SLIT2,SNAI2,SOX7,TEK,THY1,VIM	24
	Organismal Development	Size of body	3.41e-06	Decreased	-2.246	ABHD5,ABL2,ADGRF5,AEBP1,AP1M2,APBB2,AQP1,BDNF,BGN,BICD2,BLMH,BNIP3L,CAMTA1,CAVIN3,CEBPA,CERS3,CLCF1,CLMP,COL10A1,COL2A1,COL3A1,COL5A2,COL5A3,CPEB2,CSF1,CTSK,CUL4B,CXCL14,DBI,DGAT1,DSG3,EBF1,EFNA3,ERBB3,ESAM,FABP5,FAM20C,FMO5,GIT1,GRB10,HBEGF,HSPG2,IGF2,IGFBP4,IGFBP7,ITPR3,ITPRID2,Krt10,LAMA4,LAMC1,LPAR1,MAF,MFSD2A,MGP,MMP13,MMP14,MMP2,MMP9,Neat1,NFIL3,NOS3,NPR2,OVOL1,PAIP2,PER1,PEX13,PKDCC,PLAT,P…	85
	Cell-To-Cell Signaling and Interaction	Adhesion of blood cells	3.02e-06	Decreased	-2.241	ADORA1,ALOX12,ATP2A3,AXL,CACNA1C,CAMP,CCL19,CCL21,CCN1,CCR3,CD34,CERCAM,CSF1,CTSG,ELANE,EPHA4,ERG,GP5,HSPG2,HYAL4,IGHM,IL18,ITGA2B,ITGB3,LBP,LSP1,Ly6a (includes others),MCAM,MRAS,NOS3,NPTX1,NTN1,PECAM1,PER1,RASGRP1,RASGRP2,SERPING1,SLC4A1,SLIT2,SPON2,THBS1,THBS2,THY1,TNFSF12,VAV3	45
	Embryonic Development,Organ Development,Organismal Development,Respiratory System Development and Function,Tissue Development	Formation of lung	1.19e-09	Decreased	-2.227	ACE,ACE2,ADAMTS2,ADGRF5,AKAP12,CCN2,CEBPA,CEBPG,COL2A1,COL3A1,CTSK,DCHS1,DHCR7,ELN,ERRFI1,FBN1,FGFR1,FLT4,FSTL1,GIT1,GRHL2,HBB,HBEGF,IGF2,KLF2,LAMC1,LOXL1,MGP,MMP14,MMP2,MMP9,NOS3,PDGFRA,PECAM1,PKDCC,PTH1R,RASGRP1,RCN3,SELENON,SPARC,SRF,TEK,TGFB3,THBS1,TIE1,TIMELESS,ZNF521	47
	Respiratory System Development and Function	Respiratory system development	1.3e-08	Decreased	-2.227	ACE,ACE2,ADAMTS2,ADGRF5,AKAP12,CCN2,CEBPA,CEBPG,COL2A1,COL3A1,CTSK,DCHS1,DHCR7,ELN,ERRFI1,FBN1,FGFR1,FLT4,FSTL1,GATA3,GIT1,GRHL2,HBB,HBEGF,IGF2,KLF2,LAMC1,LOXL1,MGP,MMP14,MMP2,MMP9,NOS3,PDGFRA,PECAM1,PKDCC,PTH1R,RASGRP1,RCN3,SELENON,SLIT3,SPARC,SRF,TEK,TGFB3,THBS1,TIE1,TIMELESS,ZNF521	49
	Cellular Movement,Hematological System Development and Function,Immune Cell Trafficking	Cellular infiltration by leukocytes	1.38e-08	Decreased	-2.209	ACE2,ACKR1,BCL11B,BGN,C1QTNF6,C2,CCL19,CCL21,CCN1,CCN2,CD276,CEBPA,CSF1,CTSG,CTSK,CYP2J2,EGFL7,EGLN3,ELANE,FCN1,GLIS2,Ighg2b,IL18,IL36A,IRF6,ITGB3,KPNA4,LAMA4,LBP,LCN2,Ly6a (includes others),MCAM,MMP14,MMP2,MMP9,MYLK,NOS3,NR4A1,NTN1,P2RY4,PLAT,PRDM1,Prss34,RB1,RB1CC1,RORA,SCGB1A1,SERPING1,SGPP1,SLIT2,SOD3,SPARC,THBS1,TNFAIP8,TNFSF12,USP38,VAV3	57
	Dermatological Diseases and Conditions,Organismal Injury and Abnormalities	Keratosis	5.67e-07	Decreased	-2.208	ABHD5,ALOX12,CERS3,CLDN1,COCH,DSC2,DSG1,DSG3,DSP,FERMT1,IDE,IL36A,KANK2,KRT1,Krt10,PDCD4,PNPLA1,PRKCG,RB1,SERPINB13,SERPINB7,SPINK5,TRPV3	23
	Dermatological Diseases and Conditions,Organismal Injury and Abnormalities	Hyperkeratosis	9.02e-07	Decreased	-2.208	ABHD5,CERS3,CLDN1,DSC2,DSG1,DSG3,DSP,FERMT1,IL36A,KANK2,KRT1,Krt10,PDCD4,PNPLA1,RB1,SERPINB7,SPINK5,TRPV3	18
	Dermatological Diseases and Conditions,Organismal Injury and Abnormalities	Benign skin lesion	2.92e-10	Decreased	-2.201	BLMH,CEBPA,COL18A1,DGAT1,DSC3,DSG1,DSG3,Dst,ELANE,ERRFI1,FERMT1,IL36A,Krt10,KRT15,MMP9,PDGFRA,PERP,PIK3CB,PLAT,SERPINB13,SERPINB8,SPINK5,TRPV3	23
	Inflammatory Response	Inflammatory response	1.96e-09	Decreased	-2.176	ACE,ACKR1,Acp5,ADGRF5,ADORA1,ADRA2A,AXL,BDNF,CAMP,CCL19,CCL21,CCR3,CD276,CDCP1,CEBPA,CEBPD,CIRBP,CLCF1,COL18A1,CRTC3,CSF1,CSRP3,CTSG,CXADR,CXCL14,DPEP1,DUSP22,Ear2 (includes others),ELANE,ELN,ENG,EPX,GADD45A,GATA3,GIT1,GNAI3,HSPG2,IGHM,IL18,IL36A,IRF6,ITGB3,KRT1,LBP,LCN2,LOXL2,LSP1,LTBP1,LYST,MAF,MFSD2A,MGLL,MMP14,MMP2,MMP9,MYLK,NFATC4,NFIL3,NOS3,NR1D2,NR4A1,NTN1,Orm1 (includes others),PDCD4,PECA…	97
	Cancer,Organismal Injury and Abnormalities	Visceral metastasis	8.49e-07	Decreased	-2.147	ACTA2,AKAP12,C1R,CCN1,CCN2,CD248,CDH2,CEBPD,COL4A1,COL4A2,COL6A3,CRABP2,CRYBG1,CSF1,CTSG,EGFL7,ELANE,ERBB3,FGFR1,FLT4,HMMR,HTRA1,IGFBP7,IL18,ITGB3,ITPR3,JAG1,LCN2,LRRC17,MMP2,MMP9,MYBPH,OLFML3,PCOLCE,PDGFRA,PDGFRB,PIK3CB,PLAT,PLPP3,PRRX2,S1PR1,SCGB1A1,SH3GL2,SNAI2,SND1,SQSTM1,STEAP3,TEK,THBS1,TP63,TUBA8	51
	Cellular Movement	Homing of cells	1.75e-12	Decreased	-2.143	ACKR1,ADGRA2,ADORA1,AKAP12,AXL,BDNF,BRMS1,CAMP,CCL19,CCL21,CCN1,CCN2,CCR3,CDCP1,CHST2,CSF1,CTSG,CXADR,CXCL14,CXCR6,DAAM1,DNM1,DPEP1,Ear2 (includes others),ECSCR,ELANE,ELN,ENG,ERBB3,FBN1,GATA3,GIT1,GNAI3,HBEGF,IGF2,IL18,ITGB3,LBP,LCN2,LPAR1,LSP1,LYST,MAP3K1,MMP14,MMP2,MMP9,MRGPRX2,MYLK,MYO5B,NCK1,NOS3,NPTX1,NR4A1,NTN1,PDGFRA,PDGFRB,PIK3CB,PLAT,PLXNA3,PRKCG,RADIL,RALBP1,Retnlg,S1PR1,S1PR3,SEMA3B,SE…	82
	Cancer,Organismal Injury and Abnormalities	Embryonal tumor	1.34e-06	Decreased	-2.125	ADAMTS5,ADORA1,AKAP12,AMMECR1,C3orf52,CAMTA1,CD79B,CDKN2B,COCH,COL3A1,COL4A1,COL4A2,CSF1,CXADR,CXCR6,DEPP1,DLC1,ECT2,ENG,ENTPD4,EPCAM,EPHB6,FA2H,FGFR1,FLT4,GJB4,HSPG2,IDE,IGF2,IGFBP6,ITGB3,KLF3,KMT2C,LGALS7/LGALS7B,LPAR1,MAP3K1,MBP,MCAM,MGLL,MGP,MMP14,MMP9,NFE2L3,NPTX1,PDGFRA,PDGFRB,PLAT,PLEKHA4,PMP22,PRX,PYCARD,RAPGEF4,RB1,RB1CC1,RETREG1,SLC12A2,SLC20A1,SLC22A4,TAF13,TAOK1,TCF4,TEK,THBS2,THBS4,T…	71
	Cell-To-Cell Signaling and Interaction	Aggregation of cells	6.93e-11	Decreased	-2.105	ADRA2A,ALOX12,ANO7,ATP2A3,AXL,BDNF,C1QTNF1,CDH2,CLMP,COMP,CTSG,DSC2,EGFL7,EPCAM,EPHA4,ESAM,GP5,GPX3,HBEGF,IGHM,ITGA2B,ITGB3,Ly6a (includes others),MMP14,MMP9,MPZ,MRAS,MYLK,NOS3,NTN1,P2RY1,PDGFRA,PDGFRB,PEAR1,PECAM1,PIK3CB,PLAT,PLPP3,Podxl,RAB27B,RASGRP1,RASGRP2,RUNX2,SCARF2,SERPINH1,SLIT2,THBS1,THBS2,TIMP2,VAV3	50
	Embryonic Development,Organ Development,Organismal Development,Skeletal and Muscular System Development and Function,Tissue Development	Formation of muscle	3.23e-06	Decreased	-2.096	ALOX12,BDNF,BGN,BOC,CDH2,CENPF,CHKB,COL6A3,COMP,CSRP3,CXADR,DAAM1,DNM1,ELN,ENG,ERBB3,GJC1,HBEGF,HSPG2,IFI16,IGF2,JAG1,KLF2,KRT17,LAMB2,MMP14,MMP2,MRAS,MYLK,NEU3,NFATC4,NTN1,PDGFRA,PDGFRB,PMP22,RB1,S1PR3,SLIT2,SLIT3,SOCS2,SRF,TANC1,TCF3,THBS1,TNFSF12,TP63,VIM	47
	Cellular Movement	Invasion of tumor cell lines	2.89e-10	Decreased	-2.089	ABL2,ABLIM1,ACTA2,ADRA2A,AKAP12,AXL,BDNF,CAPN12,CAPNS1,CCL19,CCL21,CCN1,CCN2,CDCP1,CDH2,CEBPA,CEBPD,COL18A1,COL2A1,CRTAP,CST6,CTSK,CYP2J2,DBN1,DLC1,DSG3,DSP,ECT2,EFNA3,ENG,EPCAM,EPHB6,ERBB3,ERG,FABP5,FBLN2,FBLN5,FGFR1,GATA3,GIT1,GNAI3,GRB7,HAS1,HBEGF,HBP1,HTRA1,HTRA3,HTRA4,IGF2,IPO7,IRF6,ITGB3,JUND,KRT17,LCN2,LOXL2,LPAR1,MCAM,MMP13,MMP14,MMP2,MMP9,MTA1,Nebl,NFATC4,NTN1,NUMBL,PARVA,PARVB,PDCD4,PDG…	104
	Cell Morphology	Sprouting	1.13e-07	Decreased	-2.088	ABL2,ADCY6,ADGRA2,AQP1,ARHGAP32,BDNF,CAPNS1,CCL19,CCL21,CCN1,CDH2,COL18A1,CRIP1,DBN1,DYNLT1,EFNA3,EPHB3,FARP1,FGFR1,FLT4,GEM,GIT1,HSPG2,HTRA1,IGF2,IGFBP4,IL18,ITGB3,JAG1,LAMA4,LCN2,MID1,MYO5B,NEU3,NFATC4,NOS3,NPR2,NR4A1,NTN1,NUMBL,PLAT,RAPGEF4,RUNX2,S1PR1,S1PR3,SHANK3,SLIT2,SPTBN2,SRCIN1,SRF,TEK,THBS1,TIE1,VIM,ZDHHC8	55
	Cardiovascular System Development and Function	Development of vasculature	3.51e-20	Decreased	-2.042	ABL2,ACE,ACE2,ACTA2,ADAM19,ADAMTS2,ADCY6,ADGRA2,ADRA2A,ALOX12,AQP1,AXL,BDNF,BMP1,BRMS1,CAMP,CAPNS1,CCL21,CCN1,CCN2,CCR3,CD276,CD34,CDH2,CDKN2B,CEBPD,CLDN5,COL15A1,COL18A1,COL3A1,COL4A1,COL4A2,COL5A1,COL8A2,COMP,CSF1,CXADR,CXCL14,CYGB,DAAM1,DHCR7,DLC1,DLG2,DMP1,DRAP1,ECSCR,ECT2,EFEMP2,EFNA3,EGFL7,EGLN3,ELN,EMILIN1,EMP2,ENG,EPHB3,ERG,ERRFI1,ESAM,FBLN2,FBLN5,FBN1,FGFR1,FLT4,FOXN1,FSTL1,FUT1,GADD45A,…	157
	Cardiovascular System Development and Function,Organismal Development	Angiogenesis	6.59e-18	Decreased	-2.042	ACE2,ADAMTS2,ADCY6,ADGRA2,ADRA2A,ALOX12,AQP1,AXL,BDNF,BRMS1,CAMP,CAPNS1,CCL21,CCN1,CCN2,CCR3,CD276,CD34,CDH2,CDKN2B,CEBPD,CLDN5,COL15A1,COL18A1,COL3A1,COL4A1,COL4A2,COL5A1,COL8A2,COMP,CSF1,CXCL14,CYGB,DAAM1,DHCR7,DLG2,DMP1,DRAP1,ECSCR,ECT2,EFEMP2,EFNA3,EGFL7,EGLN3,ELN,EMILIN1,EMP2,ENG,EPHB3,ERG,ESAM,FBLN2,FBLN5,FGFR1,FLT4,FOXN1,FSTL1,FUT1,GADD45A,GEM,GJC1,HAS1,HBEGF,HSPG2,HTRA1,IFI16,IGF2,IGFBP4,…	140
	Connective Tissue Development and Function,Skeletal and Muscular System Development and Function	Bone mineral density	1.83e-07	Decreased	-2.028	ACKR1,Acp5,BGN,CCN2,CD276,Clec2d (includes others),COL2A1,CREB3L1,CSF1,CTSK,DMP1,FAM20C,IGF2,IGHM,MFAP5,MGP,MMP14,MMP2,NOS3,PRDM1,PTH1R,RAMP2,RUNX2,SLC39A13,SMURF1,SPARC,THBS2,TSC22D3	28
	Organismal Development,Renal and Urological System Development and Function	Development of urinary tract	9.74e-07	Decreased	-2.019	ACE,AQP1,ATP12A,BDNF,BICC1,CENPF,CSF1,CXCL14,DCHS1,EPCAM,FBN1,FGFR1,FLT4,FSTL1,GATA3,GEM,GLIS2,GRHL2,HBB,HBEGF,IGF2,JAG1,LAMC1,LCN2,MGP,MMP14,MMP9,NID1,NOS3,OSR2,OVOL1,PDGFRB,PLA2G3,Podxl,SLC5A1,SLIT2,TIMELESS,TIMP2,TP63,ZNF521	40
	Embryonic Development,Organ Development,Organismal Development,Renal and Urological System Development and Function,Tissue Development	Formation of kidney	3.9e-06	Decreased	-2.019	ACE,AQP1,ATP12A,BDNF,BICC1,CENPF,CSF1,CXCL14,DCHS1,EPCAM,FBN1,FGFR1,FLT4,GATA3,GEM,GLIS2,GRHL2,HBB,HBEGF,IGF2,JAG1,LAMC1,LCN2,MGP,MMP14,MMP9,NID1,NOS3,OSR2,OVOL1,PDGFRB,PLA2G3,Podxl,SLC5A1,SLIT2,TIMELESS,TIMP2,ZNF521	38
	Cellular Movement	Cell movement of breast cancer cell lines	1.72e-06	Decreased	-2.012	ADAMTS5,ADGRF5,AXL,CCN2,CDCP1,CDH2,CEBPD,CST6,CYP2J2,DAAM1,DLC1,ENG,EPHB6,ERBB3,GATA3,GIT1,ITGB3,JUND,LCN2,LPAR1,MCAM,MMP14,MMP2,MMP9,NFATC4,PDCD4,PIK3CB,PPIC,RHOC,RNF11,RUNX2,SERPINB5,SLIT2,SNAI2,SPARC,SRCIN1,SSH1,TGFB1I1,TGFB3,TIMP2,TNFAIP8,TP63,TRIP10,VAV3,VIM	45

## Sheet: d IPA USRs of 1073 DEGs
IPA USR analysis of DEGs from b (n=1073) (direct and Indirect interactions) with USRs sorted by z-score.	Upstream Regulator	Expr Log Ratio	Molecule Type	Predicted Activation State	Activation z-score	p-value of overlap	Target Molecules in Dataset	Mechanistic Network
	TGFB1		growth factor	Inhibited	-4.795	1.91e-25	Acan,ACE,ACKR1,ACP3,Acp5,ACTA2,ADAM19,ADAMTS2,ADORA1,ADRA2A,AFM,ALOX12,AQP1,ARL4A,AXL,BDNF,BGLAP,BGN,BMP1,BNIP3L,C1R,C2,CALML3,CAMP,CAPNS1,CCN1,CCN2,CCNG2,CCR3,CD34,CDH2,CDKN2B,CDT1,CEBPA,CENPF,CHST3,CLDN1,Clec2d (includes others),COL16A1,COL18A1,COL2A1,COL3A1,COL4A1,COL4A2,COL5A1,COL6A1,COL6A2,COL6A3,COMP,CPXM1,CSF1,CTSK,CXADR,CXCR6,CYP1A1,DAAM1,DBP,DSC2,DSP,ELN,EMILIN1,ENG,EPCAM,ESAM,ESRP2,FABP…	444 (22)
	VEGFA		growth factor	Inhibited	-4.138	2.09e-05	ABHD5,ACE,ACSL1,ACTA2,CCN1,CCN2,CD34,FGFR1,FLT4,GRB10,HBEGF,IGFBP4,ITGB3,MMP13,MMP2,MMP9,MYLK,NOS3,NR4A1,PDGFRB,PECAM1,PLAT,PLPP3,PNPLA2,RUNX2,SNAI2,SPARC,Stfa1 (includes others),TEK,THBS1	322 (19)
	SOX7	0.445	transcription regulator	Inhibited	-4.123	2.3e-09	COL4A1,COL4A2,CRABP2,EGFL7,ENG,FGFR1,FLT4,GRHL3,HSPG2,IRF6,KRT17,MMP14,MMP2,OVOL1,PPL,PRDM1,Sprr2h
	F2R		G-protein coupled receptor	Inhibited	-3.931	8.17e-06	CCN1,CCN2,DSP,IGFBP7,MCAM,MMP2,MMP9,NR4A1,PLAT,SERPINB5,TAGLN,TEK,TGFB1I1,THBS1,TJP3,VIM	327 (17)
	EDN1		cytokine	Inhibited	-3.662	0.000417	ACTA2,ADAM19,CCN1,CCN2,CDH2,COL4A1,COL5A1,COMP,ERRFI1,FLT4,HBEGF,IL18,ITGB3,MBP,MCAM,MMP13,MMP2,MMP9,THBS1,VIM	328 (21)
	TGFB3	-0.528	growth factor	Inhibited	-3.633	2.46e-12	ACTA2,ADAM19,CCN1,CCN2,CDH2,CDKN2B,COL10A1,COL2A1,COL3A1,COL5A1,ELN,ENG,GATA3,HTRA1,ITGB3,JUND,LTBP2,MGP,MMP2,MMP9,S1PR3,SCD,SNAI2,TAGLN,TGFB3,THBS1	320 (19)
	carbon tetrachloride		chemical toxicant	Inhibited	-3.565	0.00304	ACTA2,CCN2,COL3A1,CYP1A1,FAAH,GADD45A,IGFBP6,JUND,MGLL,MMP13,MMP2,MMP9,NR4A1,PDGFRA,PDGFRB,PECAM1,RB1,S1PR3,TIMP2	399 (19)
	HTT		transcription regulator	Inhibited	-3.529	2.42e-05	ACKR1,ACTA2,ADAMTS2,ADAMTS5,AKAP12,AQP1,BCL11B,BDNF,BMP1,C1R,CAVIN3,CCN2,CEBPA,CLDN1,COCH,COL16A1,COL18A1,COL4A1,COL4A2,COL6A1,COL6A3,DBP,DHCR7,DNM1,EBF1,FGFR1,GJC1,GPX3,HBEGF,IFI16,IGF2,KLF5,KRT1,LTBP2,MCAM,MGP,MMP14,MMP2,NFIL3,NPTX1,NR1D2,NR4A1,PER1,PRELP,PRKCG,RASGRP2,SERPING1,SERPINH1,SLC12A2,SOCS2,SPTBN2,SQSTM1,TAGLN,TCF3,THBS2	385 (18)
	Tgf beta		group	Inhibited	-3.406	6.18e-14	Acp5,ACTA2,ADH1C,BGLAP,BGN,CCN1,CCN2,CD79A,CDH2,CDKN2B,COL10A1,COL4A1,COL4A2,COL5A1,COL6A2,CSF1,CTSK,ENG,FBLN2,FSTL1,GATA3,HSPG2,IGFBP4,Ighg2b,ITGB3,JAG1,KRT1,Ly6a (includes others),MAF,MMP13,MMP14,MMP2,MMP9,NOS3,PHLDB1,PLAT,PLPP3,RORA,RUNX2,SLIT3,SNAI2,SPARC,TAGLN,THBS1,TIMP2,VIM	330 (15)
	EGF		growth factor	Inhibited	-3.333	5.25e-06	ALOX12,CCN1,CCN2,CEBPD,CLDN8,COL3A1,COL4A2,CXCL14,CYP1A1,EPCAM,ERRFI1,FGFR1,FSTL1,FUT2,GADD45A,GFPT2,GRB7,HBEGF,IGF2,IGFBP4,ITGB3,JUND,KRT15,LCN2,MMP13,MMP2,MMP9,NPR2,NR4A1,PDCD4,PDGFRB,PER1,PLAT,PLPP3,RUNX2,SCD,SCGB1A1,SMURF1,SNAI2,SPARC,ST3GAL1,TGFB3,THBS1,TJP3,TP63,VIM,ZBTB33	382 (24)
	NORAD		other	Inhibited	-3.317	8.55e-07	CCN1,CCN2,COL4A1,COL4A2,COL5A1,COL6A2,IGFBP4,PHLDB1,SLIT3,TAGLN,THBS1
	CCR2		G-protein coupled receptor	Inhibited	-3.286	1.58e-08	AEBP1,BGN,COL4A1,COL4A2,COL6A1,COL6A2,COL6A3,CSF1,FBLN2,FBN1,HSPG2,IL18,LAMB2,MMP13,MMP2,MMP9,PCOLCE,PRELP,SPARC,THBS1,TIMP2	438 (19)
	TGFB2		growth factor	Inhibited	-3.238	1.27e-07	ACTA2,BGLAP,CCN2,CD248,COL10A1,COL3A1,COL4A1,COL6A2,HBEGF,HSPG2,JAG1,MMP2,MMP9,PDGFRB,PECAM1,SCD,SNAI2,TAGLN,THBS1,TIMP2	329 (19)
	TAZ		enzyme	Inhibited	-3.083	8.17e-06	ADAMTS5,AXL,BDNF,CCN1,CCN2,CDH2,COL5A1,COL5A2,IFI16,LOXL2,MFAP5,PLK2,RUNX2,S1PR1,SERPINB7,TAGLN	131 (13)
	Brd4		kinase	Inhibited	-3.051	1.47e-05	ACTA2,C1R,COL3A1,COL4A1,COL4A2,COL5A2,COL6A3,LOXL2,P2RY4,PLAT,SLC4A1,SPON2,TAGLN	266 (7)
	SP1		transcription regulator	Inhibited	-3.004	2.39e-08	ACSL1,ACTA2,ADCY4,AEBP1,AKAP12,ALOX12,ATP2A3,BDNF,BGLAP,BNIP3L,CAMP,CCN2,CCNG2,CD79B,CDH2,CDKN2B,CEBPA,CEBPD,CIRBP,COL2A1,CRABP2,DHCR24,DLC1,DNM1,ELANE,ENG,FGFR1,GLTP,HAS1,HBB,HBEGF,IGF2,IGFBP4,ITGB3,MMP14,MMP2,MMP9,MTA1,MYLK,NOS3,PDGFRA,PDGFRB,PTH1R,RASGRP2,RB1,ROBO4,RUNX2,SLC22A4,SLC2A12,SLC5A1,SPARC,TAGLN,TIMP2,TP73,VIM	391 (22)
	GRB2		other	Inhibited	-3	0.000454	ACTA2,CRABP2,GRHL3,IRF6,KRT17,OVOL1,PPL,PRDM1,Sprr2h	260 (7)
	ROCK1		kinase	Inhibited	-2.985	2.24e-06	CCN2,COL3A1,COL4A2,COL5A1,COL6A2,FBLN2,FBN1,LAMA4,LAMC1	159 (9)
	thioacetamide		chemical toxicant	Inhibited	-2.973	2.9e-10	ACTA2,AKAP12,BGN,CCN2,CDCP1,COL3A1,CYGB,CYP1A1,DBN1,ELN,FANCB,FBLN5,FBN1,FCER1A,FSTL1,GPX3,HDGFL2,LCN2,LTBP1,MMP13,MMP14,MMP2,PCOLCE,PDGFRA,PECAM1,PLET1,PLPP3,PMP22,PRELP,SPARC,STEAP3,TAGLN,TCF4,TGFB3,TIMP2,TMEM45A	408 (16)
	FOXC2		transcription regulator	Inhibited	-2.954	0.001	ACTA2,CDH2,CEBPA,ITGB3,MMP2,MMP9,PDGFRB,RUNX2,VIM	262 (9)
	CCN2	-0.742	growth factor	Inhibited	-2.926	1.19e-05	Acan,ADAMTS5,CCN2,COL10A1,COL2A1,COL4A2,EGLN3,EMILIN1,IGF2,MMP13,MMP14,MMP2,MMP9,PTH1R,RAMP2,SPARC	364 (24)
	SNAI1		transcription regulator	Inhibited	-2.925	2.17e-07	Acan,AXL,BGLAP,CCN1,CCN2,CDH2,CLDN1,COL2A1,CXADR,EPCAM,KRT17,MMP14,MMP9,PARVB,RAB25,RUNX2,SERPINH1,SLC29A1,SNAI2,SPARC,THY1,TP63,VIM	373 (19)
	lysophosphatidic acid		chemical - other	Inhibited	-2.849	2.11e-05	ACTA2,CCN1,CCN2,CSF1,KLF5,MMP9,MPZ,NOS3,PDGFRA,PDGFRB,PRKCG,S1PR3,SRF,TAGLN,VIM	321 (21)
	bleomycin		chemical drug	Inhibited	-2.839	9.54e-08	ACTA2,BMP1,CCN2,CEBPA,COL3A1,CTSK,ELN,FGFR1,FZD6,HBEGF,IL18,JAG1,LTBP1,LTBP2,MID1,MMP14,MMP2,MMP9,Nnt,NR4A1,PLAT,SOCS2,THBS1,THBS4,TIMP2,TINAGL1,TP63	421 (20)
	IKBKB		kinase	Inhibited	-2.825	3.01e-06	Acp5,AEBP1,CCL19,CCN2,CCR3,CEBPD,CLDN1,CSF1,CTSK,ECT2,GADD45A,HAS1,IFI16,IGFBP6,IGFBP7,ITGB3,KLF5,LCN2,MBP,MGP,MMP13,MMP2,MMP9,NID1,NOS3,SMURF1,SOCS2,SOD3,TIMP2,TMEM176B,TP63	405 (20)
	PRL		cytokine	Inhibited	-2.824	0.00128	CEBPD,CLDN5,COL3A1,COL5A1,ERBB3,FLT4,IDE,IGF2,KRT15,LAMC1,MGP,MICOS10-NBL1/NBL1,MMP14,NOS3,PCOLCE,PDGFRA,PLAT,SHFL,SND1,SOCS2,SPARC,TIMP2,TP63,VIM	421 (20)
	diethylstilbestrol		chemical drug	Inhibited	-2.777	9.48e-13	ADCY6,ADGRD1,ADH1C,ATP12A,BGLAP,CCL21,CCN2,CENPF,CLN8,COMP,CPXM1,CRABP2,CTSK,CXCL14,CYGB,CYP2F1,ENDOU,GADD45A,GDF10,HBEGF,HTRA3,IGFBP6,ITIH4,Krt10,KRT15,LSP1,LTBP2,MGP,MMP2,NPDC1,NUMBL,PCOLCE,PDGFRA,PDGFRB,PRDM1,SERPINB5,SLC6A14,SLC6A20,SOCS2,SPARC,STEAP3,TCF7L1,TGFB3,THBS2,TP63	383 (18)
	TGFA		growth factor	Inhibited	-2.747	0.000759	CCN2,ERRFI1,IGFBP4,LCN2,MMP13,MMP9,PECAM1,PLAT,RB1,SERPINB5,VIM	427 (25)
	ERG	-0.694	transcription regulator	Inhibited	-2.726	0.000284	ALOX12,CDH2,DAAM1,DBN1,EGFL7,ERG,HMMR,MMP9,NFIL3,NOS3,PARVA,PECAM1,PLAT,PLPP3,RHOJ,SLIT2,SPARC,TGFB1I1,THBS1,TSC22D3,VIM	309 (11)
	AGT		growth factor	Inhibited	-2.716	0.000222	ACE,ACE2,ACTA2,ADAMTS5,ADH1C,ALOX12,ASAH2,BDNF,BGN,CACNA1C,CCN2,COL3A1,COL4A1,COL6A1,CRABP2,CYP2J2,ENG,ERRFI1,HBEGF,Hotair,HSPG2,IFI16,IGFBP4,IL18,ITGB3,JAG1,KLF5,LCN2,MMP2,MMP9,NOS3,NR4A1,PECAM1,PNKD,SCNN1A,SOD3,SPTSSA,TGFB3,VIM	428 (20)
	ZEB1		transcription regulator	Inhibited	-2.715	1.4e-06	CCNG2,CDKN2B,COL3A1,CXADR,ESRP2,GATA3,GRHL2,LOXL2,MMP2,MMP9,MPZL2,RAB25,TP63,TP73,VIM	352 (17)
	PAX1		transcription regulator	Inhibited	-2.714	2.96e-06	COL2A1,CRABP2,GRHL3,IRF6,KRT17,OVOL1,PDGFRA,PPL,PRDM1,Sprr2h,THY1
	cholesterol		chemical - endogenous mammalian	Inhibited	-2.65	0.0139	ACSL1,ACTA2,COL3A1,CSF1,CTSK,DBI,DHCR7,FABP5,HBEGF,MMP14,MMP2,NOS3,NR4A1,Orm1 (includes others),SC5D,SCD,THBS1,TMEM123
	dimethylnitrosamine		chemical toxicant	Inhibited	-2.646	0.00291	ACTA2,COL3A1,COL4A1,IGF2,MMP9,NR4A1,VIM	406 (19)
	NRG1		growth factor	Inhibited	-2.616	6.52e-06	AXL,CAVIN1,CCN1,CCN2,COL6A3,EMP2,ERBB3,ERRFI1,FABP5,FSTL1,GPX3,GRB7,HMMR,IGF2,ITGB3,JUND,LHFPL6,MAF,MBP,MGLL,MMP9,MTA1,NR4A1,PDCD4,PMP22,SH2D4A,SLIT2,THBS1,VIM	332 (17)
	PDGFC		growth factor	Inhibited	-2.61	2.59e-05	ACTA2,COL4A2,NR4A1,PDGFRA,PDGFRB,TEK,TIMP2	257 (10)
	CD36		transmembrane receptor	Inhibited	-2.607	0.0083	AXL,COL4A1,DGAT1,IGFBP4,IGFBP6,IGFBP7,MMP13,MMP14,PNPLA2,SCD	431 (22)
	leukotriene D4		chemical - endogenous mammalian	Inhibited	-2.607	0.00898	APOLD1,CCN1,GEM,HBEGF,KLF2,NR4A1,PDGFRB	247 (7)
	PI3K (complex)		complex	Inhibited	-2.598	0.000247	CCN2,CCNG2,CD79B,CDH2,CDKN2B,FABP5,FBLN5,GATA3,HAS1,HBEGF,IGF2,KLF2,LCN2,LSP1,LTBP2,MCAM,MMP13,MMP14,MMP2,MMP9,NOS3,PDCD4,PLB1,PRDM1,TAGLN,THBS1,TP63	402 (19)
	Collagen type I (complex)		complex	Inhibited	-2.597	0.000143	ACTA2,CDH2,MMP13,MMP14,MMP2,MMP9,NOS3,PRRX2,RUNX2,TIMP2,VIM	231 (17)
	MET		kinase	Inhibited	-2.566	0.00555	BMP1,BNIPL,CDH2,CLDN1,COL5A2,GATA3,HBEGF,IL18,MMP13,MMP2,PERP,PLK2,VIM	323 (17)
	MEF2D		transcription regulator	Inhibited	-2.559	0.000991	BDNF,CCN2,CDT1,COL3A1,JUND,KLF2,NR4A1,SOD3,TGFB3,VIM	127 (8)
	GLI1		transcription regulator	Inhibited	-2.555	0.00999	COL10A1,COL2A1,CSF1,DEGS1,IGF2,IGFBP6,IGFBP7,KRT15,MMP2,MMP9,NPDC1,PDGFRA,PTH1R,RAB34,RUNX2,TMEM79,VIM	317 (16)
	IgG		complex	Inhibited	-2.511	3.28e-07	AFM,CDKN2B,CEBPD,CLDN5,COL3A1,CRABP2,CSF1,DEGS1,DHCR7,DSG3,DSP,ECSCR,EFNA3,EGLN3,FABP5,JUND,KLK8,KRT15,LCN2,LGALS7/LGALS7B,Ly6a (includes others),MAF,MMP9,PPL,S1PR1,SERPINB7,SYNPO,THBS1	390 (22)
	benzo(a)pyrene		chemical toxicant	Inhibited	-2.502	0.00353	ALDH3A1,CCN1,CEBPG,CYP1A1,ECT2,IGFBP6,KLF2,LDB2,MAF,NOS3,NR4A1,NUMBL,PRKCG,RHOC,SNAI2,SOD3,SQSTM1,THBS1,ZKSCAN3	383 (19)
	RAC1		enzyme	Inhibited	-2.495	0.0122	Acan,ACTA2,CCN2,CDH2,COL2A1,MMP13,MMP14,MMP2,MMP9,SNAI2,SRF
	GATA6		transcription regulator	Inhibited	-2.454	3.13e-08	ACTA2,C1R,CEBPG,COL4A1,COL4A2,CRABP2,GRHL3,IRF6,KDM5B,KLF2,KRT17,LAMB2,LTBP1,MYLK,NOS3,OVOL1,PDGFRA,PECAM1,PPL,PRDM1,PTGIS,SCD,SCGB1A1,SORBS3,SOX7,SPARC,Sprr2h,TAGLN
	platelet activating factor		chemical - endogenous mammalian	Inhibited	-2.451	0.00205	CDH2,MMP14,MMP2,MMP9,NR4A1,THBS1,TIMP2,VIM	397 (20)
	HOXD3		transcription regulator	Inhibited	-2.449	0.000144	DSG1,DSP,ITGB3,MMP2,TAGLN,THBS1
	IPMK		kinase	Inhibited	-2.449	0.000432	ACTA2,CAPNS1,CCN1,MYL9,PER1,PMP22	244 (7)
	SMAD1		transcription regulator	Inhibited	-2.438	0.000128	ACTA2,CCN2,CDKN2B,COCH,COL10A1,COL2A1,COL4A1,CSF1,RUNX2	376 (19)
	Wnt		group	Inhibited	-2.433	0.000128	ADAMTS5,CD34,CDH2,CEBPA,COL10A1,GATA3,MMP9,MPZ,RUNX2	362 (21)
	SAA1		transporter	Inhibited	-2.433	0.00531	BGLAP,BGN,CEBPA,MMP13,MMP2,MMP9	384 (19)
	isoproterenol		chemical drug	Inhibited	-2.424	0.0495	ACE,ACTA2,ADCY6,CYP1A1,MMP2,MMP9,NFATC4,NR4A1,PLAT,PNPLA2,SCD,TIMP2
	DGCR8		enzyme	Inhibited	-2.42	0.000291	ACTA2,BDNF,ERBB3,JAG1,MBP,MPZ,PDCD4,PMP22,TAGLN
	MAP2K1		kinase	Inhibited	-2.401	0.0001	ACTA2,CCN1,CCN2,CDKN2B,CEBPA,COL3A1,ITGA2B,ITGB3,JUND,MBP,MMP13,MMP14,MMP2,MMP9,MPZ,PDGFRA,PECAM1,RAB38,RUNX2,SNAI2,THBS1	291 (17)
	IL1A		cytokine	Inhibited	-2.387	8.46e-05	Acp5,ADAMTS5,APOD,CAMP,CCN1,Clec2d (includes others),CSF1,CTSK,CYP1A1,FGFR1,HSPG2,IL18,IL36B,IL36G,ITGB3,LCN2,MCAM,MMP13,MMP14,MMP2,MMP9,PDZK1IP1,SPARC,VIM,WFDC5	376 (17)
	dexamethasone		chemical drug	Inhibited	-2.386	8.12e-19	ACE,Acp5,ACSL1,ACTA2,ADAMTS2,ADGRF4,ADGRG3,ADRA2A,AEBP1,AKAP12,ANGPTL7,APOD,AQP1,ATP12A,BDNF,BGLAP,BGN,BLZF1,BMP1,BNIPL,CAMP,CCL21,CCN1,CCN2,CCNG2,CCR3,CD34,CDH2,CDKN2B,CEBPA,CEBPD,CILP,Clca3a1/Clca3a2,CLDN5,Clec2d (includes others),COL10A1,COL15A1,COL27A1,COL3A1,COL4A1,COL4A2,COL5A1,COL6A1,COL6A2,CRABP2,CRIP1,CRTC3,CRYBG1,CSF1,CTSK,CXADR,CXCL14,CYP1A1,Cyp2b19,CYP2J2,DEPP1,DHCR24,DLC1,DMP1,ECT2,E…	468 (22)
	tretinoin		chemical - endogenous mammalian	Inhibited	-2.36	1.58e-08	ABHD5,ABLIM1,Acp5,ACSL1,ADAMTS5,AKAP12,ALDH3A1,APOD,AQP1,ATP2A3,BGLAP,BLZF1,BNIP3L,CACNA1C,CALML3,CAMKK1,CAVIN3,CCL19,CCN1,CCN2,CD34,CDH2,CDKN2B,CEBPA,CEBPG,CERS3,CHL1,Clca3a1/Clca3a2,CLDN1,COL2A1,COL3A1,COL4A1,COL4A2,COL6A3,CRABP2,CTSK,CYP1A1,DBI,DGAT1,DLC1,DSG1,DSP,ELN,EPCAM,ERRFI1,FABP5,FERMT1,FGFR1,FLRT1,FZD10,GIMAP6,GJB4,GJB5,GRB10,GZMA,HBEGF,IDE,IFI16,IGF2,IGFBP4,IGFBP6,IGFBP7,IGHM,IL36B,IT…	465 (23)
	IKBKG		kinase	Inhibited	-2.354	0.0162	AEBP1,CEBPD,CLDN8,CSF1,IFI16,IGFBP6,KLF5,LCN2,MGP,NID1,SOD3,TMEM176B
	F2		peptidase	Inhibited	-2.345	0.00143	ACTA2,CCN1,CCN2,COL4A1,DAAM1,ELL2,HBEGF,IGFBP4,LOXL2,MGLL,MMP2,MMP9,NOS3,PDGFRA,PLAT,RHOJ,SLC2A12,SLIT2,SRF,TEK,TGFB3,THBS1,TIMP2	339 (22)
	TEAD2		transcription regulator	Inhibited	-2.333	0.000291	BBOX1,CCN1,CCN2,COL3A1,COL5A2,LOXL1,TAGLN,THBS1,TP63
	RNF31		enzyme	Inhibited	-2.333	0.00439	ACE,ADORA1,CCL19,IGFBP4,IL18,IL36A,IL36B,IL36G,TGFB3	310 (7)
	Bvht		other	Inhibited	-2.333	0.00481	ACTA2,CSRP3,CYGB,EBF1,IGF2,LSP1,SNAI2,TIE1,VIM
	KMT2D		transcription regulator	Inhibited	-2.323	0.00114	CRIP1,DSC2,DSC3,DSG3,FBXL7,GPRC5C,GRHL1,GRHL3,IRF6,KRT17,LOXL1,MARVELD1,MMP9,NEU3,PPIC,RAB38,SH3BGRL2,Zfp760,ZNF761
	prostaglandin E2		chemical - endogenous mammalian	Inhibited	-2.276	2.21e-05	Acan,ACTA2,ATP2A3,CAMP,CCN2,CEBPD,Clec2d (includes others),CSF1,DGAT1,EEA1,IGFBP4,IGFBP7,MMP13,MMP14,MMP2,MMP9,NFIL3,NR4A1,PLK2,PRDM1,RUNX2,SLC5A1,SOCS2,SRF,ST3GAL1,TCF4,THBS1,TNFAIP6,TSC22D3,VIM,WDFY1	324 (19)
	P38 MAPK		group	Inhibited	-2.249	9.24e-05	BDNF,BGN,BNIP3L,CCN2,CCNG2,CEBPA,CEBPD,CLDN5,COL3A1,CTSK,CYP1A1,HBP1,HTRA1,IRF6,ITGB3,KDELR3,KLF5,MMP13,MMP2,MMP9,MYBPH,NFATC4,NOS3,NR4A1,PRDM1,RB1,RUNX2,SCNN1A,SERPINB5,SRF,TCF3,THBS1,TIMP2	361 (18)
	FN1		enzyme	Inhibited	-2.242	5.57e-06	ACE,ACTA2,BNIP3L,CCN1,CCN2,CD79A,CDH2,DHCR24,ITGB3,JUND,MGP,MMP13,MMP14,MMP2,MMP9,PDGFRA,RUNX2,SNAI2,SPARC,SQSTM1,TAGLN,TCF4,THBS1,TIMP2,VIM	380 (22)
	CPXM1	-0.784	peptidase	Inhibited	-2.236	8.46e-07	COL15A1,COL16A1,COL4A2,COL5A1,COL6A1
	ETS1		transcription regulator	Inhibited	-2.236	0.00162	ATP2A3,BCL11A,CCN2,CD79A,CD79B,COL2A1,GZMA,ITGA2B,ITGB3,MCAM,MMP13,MMP2,MMP9,NFIL3,NOS3,PERP,PRDM1,RUNX2,SERPINB5,THY1	362 (17)
	ADAM17		peptidase	Inhibited	-2.236	0.0398	COL3A1,IL36A,KRT1,LRG1,MMP13,MMP2,PLA2G2F
	PDGF BB		complex	Inhibited	-2.221	1.16e-09	ACTA2,AKAP12,ASAH2,CCN1,CCN2,CEBPD,COL18A1,COL3A1,CSF1,DGAT1,FBLN5,FGFR1,GADD45A,GEM,GFPT2,GJC1,HBEGF,HOMER2,IGF2,IGFBP4,LAMB2,LBP,MGST2,MICOS10-NBL1/NBL1,MMP14,MMP2,MMP9,NFIL3,NR4A1,PCOLCE,PDGFRA,PDGFRB,PLAT,PLK2,PRRX2,SCD,SLC29A1,SRF,TAGLN,TGFB3,THBS1	380 (24)
	CHUK		kinase	Inhibited	-2.22	5.25e-07	Acp5,AEBP1,CCL19,CCL21,CEBPD,CLDN1,CLDN8,COL18A1,CSF1,IFI16,IGFBP6,ITGB3,KLF5,LCN2,MFAP5,MGP,MMP13,MMP2,MMP9,NID1,OVOL1,RB1,SERPINB5,SOD3,SQSTM1,TMEM176B,TP63	389 (15)
	MSX2		transcription regulator	Inhibited	-2.22	2.04e-05	BGLAP,CDH2,COL10A1,EPHA4,FOXN1,PTH1R,TGFB3,TP63,VIM	325 (19)
	LATS2		kinase	Inhibited	-2.219	0.0276	CCN1,CCN2,EPCAM,ERBB3,GATA3
	KDM3A		transcription regulator	Inhibited	-2.217	0.000367	ACTA2,CCN1,CCN2,KLF5,LOXL2,MCAM,MMP9,TAGLN	119 (4)
	cadmium chloride		chemical toxicant	Inhibited	-2.216	0.00402	CDH2,GADD45A,IGFBP6,LPAR1,Orm1 (includes others),SLC5A1,TGFB3,VIM	308 (16)
	MIA		other	Inhibited	-2.215	7.34e-06	CDH2,ITGB3,MMP14,PLAT,SPARC
	PPBP		cytokine	Inhibited	-2.213	5.44e-05	COL15A1,COL18A1,COL6A3,PDGFRB,SRF
	ITGA9		other	Inhibited	-2.213	0.00209	ACTA2,CDH2,CXCL14,MMP14,VIM	328 (23)
	PTAFR		G-protein coupled receptor	Inhibited	-2.21	0.00209	CDH2,MCAM,MMP2,MMP9,VIM	293 (15)
	IHH		enzyme	Inhibited	-2.194	0.0333	COL10A1,MMP13,PECAM1,PTH1R,RUNX2
	CXCR4		G-protein coupled receptor	Inhibited	-2.186	0.0468	AXL,CDH2,IGFBP7,MMP13,MMP2,RUNX2
	IFNG		cytokine	Inhibited	-2.182	1.09e-05	ACE,ACTA2,ADORA1,ADRA2A,ALOX12,AQP1,ARAP2,BDNF,C1R,C2,CCL19,CCN2,CCR3,CD276,CDH2,CDKN2B,CEBPA,CEBPD,CHST3,CIRBP,COL5A2,CSF1,CTSK,CXADR,Cyb5r3,DBP,DEGS1,DEPP1,DMWD,EGLN3,EHF,ELN,ENTPD2,FAAH,FABP5,FCN1,FLT4,GATA3,GBP6,HBEGF,HSPG2,HTRA1,IDE,IFI16,IGFBP4,Ighg2b,IL18,IL22RA1,IL36G,ITGB3,JAG1,JUND,KLF2,KNL1,KRT15,KRT17,LAMB2,LAMC1,LCN2,Ly6a (includes others),MFSD2A,MMP13,MMP2,MMP9,MRAS,NDRG4,NFE2L3,NOS…	386 (17)
	NOTCH4		transcription regulator	Inhibited	-2.18	0.00536	ACTA2,FLT4,TAGLN,TEK,TIE1	44 (3)
	PLAUR		transmembrane receptor	Inhibited	-2.179	0.0304	ACTA2,ITGB3,MMP2,MMP9,VIM
	HOTAIR		other	Inhibited	-2.173	0.0468	ABL2,ACTA2,CDH2,MMP2,MMP9
	Ins1		other	Inhibited	-2.172	0.00106	ADH1C,BDNF,CEBPA,CEBPD,COL18A1,CYP1A1,ERRFI1,GATA3,GPLD1,IDE,IGF2,IGFBP4,MBP,MMP13,MMP2,MPZ,NOS3,PER1,PLAT,RUNX2,SCD,SOCS2,SPARC,THY1,TIMP2,VIM	404 (19)
	ERK		group	Inhibited	-2.171	1.01e-06	ACTA2,AXL,BGLAP,BGN,CCN2,CEBPD,COL3A1,CTSK,CYP1A1,GPRC5C,HAS1,HBEGF,ITGA2B,ITGB3,JAG1,KLF5,LCN2,MCAM,MMP13,MMP14,MMP2,MMP9,MYLK,PECAM1,PRDM1,RUNX2,SNAI2,THBS1,TNFAIP8	374 (20)
	CBX5		transcription regulator	Inhibited	-2.168	0.000166	ALDH3A1,ANKRD22,BCL11A,CYP2J2,GDPD3,GRHL3,HBB,KRT80,LCN2,PROM2,PTK6,RNF39,RORA,RUNX2,SH3GL2
	IGF2BP1		translation regulator	Inhibited	-2.138	7.65e-05	BCL11A,COL5A1,COL6A2,COL6A3,GADD45A,HBB,IGF2,SERPINH1
	SYVN1		transporter	Inhibited	-2.138	0.00352	AXL,CAVIN1,CRTAP,IGHM,MCAM,PLPP3,PNPLA2,RAB34,SCARA3,SLC1A5,SLC20A1,SLC30A1,SLC43A3,TNS4
	APP		other	Inhibited	-2.124	0.00226	ACTA2,ADAM19,ATP12A,AXL,BDNF,C1R,CALML3,CCN2,CCNG2,CDH2,CLDN1,CLDN5,COL18A1,CRABP2,CSF1,DBI,DBN1,DNM1,ELN,ENG,FGFR1,GBP6,HDAC11,HSPG2,IDE,IFI16,IGF2,IL18,ITGB3,ITPR3,JUND,LBP,LDB2,Ly6a (includes others),MAF,MBP,MMP13,MMP14,MMP2,MMP9,NOS3,NPTX1,PAK3,PDCD4,PDGFRA,PDGFRB,PLAT,PRKCG,PYCARD,RNF144B,S1PR1,SH3GL2,SLIT2,SQSTM1,TAGLN,THY1,TP53INP1,TP63,TP73,TUBA8	402 (20)
	CD44		other	Inhibited	-2.115	1.14e-10	ABCA5,ACTA2,BGN,CCL19,COL18A1,COL3A1,COL5A2,CRABP2,CTSK,CXADR,Cyb5r3,EMILIN1,GADD45A,HMMR,LAMC1,LIMS2,LTBP1,LTBP2,Ly6a (includes others),MMP13,MMP14,MMP2,MMP9,PARVB,PDCD4,PECAM1,PLPP3,SMARCD1,SPINK5,THBS1,THBS2,THY1,VIM	343 (20)
	Akt		group	Inhibited	-2.106	0.0148	ACTA2,CCN2,CDH2,CHST3,COL2A1,COL3A1,ERBB3,GALNT18,HSPG2,IGF2,KIRREL1,LAMB2,LCN2,MCAM,MMP14,MMP2,MMP9,NFIL3,RB1,RUNX2,SCD,SLC6A14,SNAI2,ST3GAL1,THBS1,THBS2
	3-methyladenine		chemical toxicant	Inhibited	-2.104	0.0226	ADAMTS5,MMP13,RUNX2,SQSTM1,TP73
	IGF1		growth factor	Inhibited	-2.06	3.02e-06	Acan,ACTA2,BDNF,BGLAP,BGN,CAMP,CCN1,CCN2,CCNG2,CEBPD,COL2A1,COL3A1,CSF1,ELN,ERRFI1,FGFR1,GADD45A,HBB,IGF2,IGFBP4,IGFBP6,IL18,KIF1A,LCN2,Ly6a (includes others),MBP,MMP13,MMP14,MMP2,MPZ,NR4A1,NTN1,PCOLCE,PDGFRA,PDGFRB,PLK2,PTH1R,RUNX2,SCD,SLC20A1,SNAI2,THBS1,THY1,VIM	439 (21)
	SPP1		cytokine	Inhibited	-2.053	0.000385	Acp5,CAPNS1,CDH2,DHCR7,DSP,HOMER2,ITGB3,JAG1,MMP13,MMP14,MMP2,MMP9,MTA1,NOS3,RB1,RUNX2,SC5D,SNAI2,VIM	289 (19)
	hydrogen peroxide		chemical - endogenous mammalian	Inhibited	-2.043	5.76e-05	ACE,ACTA2,AEBP1,BGLAP,CCN2,CEBPG,CSF1,CYP1A1,DHCR7,ELANE,ELN,ENG,FLOT2,GADD45A,HBEGF,IDE,ITGB3,KLF2,LCN2,MCAM,MMP13,MMP2,MMP9,NFIL3,NOS3,NR4A1,PDCD4,PDGFRA,RALBP1,RUNX2,SC5D,SCNN1A,SERPINH1,SLC20A1,SLC30A1,SNAI2,SPARC,TAGLN,TCF3,TP53INP1,TP73,VIM	432 (20)
	SB 216763		chemical toxicant	Inhibited	-2.03	0.000808	CCN1,CCN2,DLG2,MYLK,NR4A1,SCD,SRF,TAGLN	365 (15)
	OSM		cytokine	Inhibited	-2.024	1.2e-06	ACE,ACTA2,ADAMTS5,ARL4A,BBOX1,BLMH,C1R,CAMP,CCNG2,CDH2,CEBPA,CEBPD,COL2A1,COL3A1,COL6A1,CST6,CXADR,DEGS1,DHCR24,DSC2,DSG3,EPCAM,EPHB6,ERBB3,FMO5,GJB5,HBEGF,IGFBP6,IL18,JAG1,KLK13,KRT17,LBP,LCN2,LRG1,MGLL,MMP13,MMP2,MMP9,MPZL2,PDCD4,PDZK1IP1,PRDM1,RORA,SERPINB8,SERPING1,SRPK1,VIM,WFDC5,ZNF266	367 (18)
	CXCL12		cytokine	Inhibited	-2.016	5.86e-05	ACTA2,AXL,BMP1,CTSK,CXCR6,IGFBP7,IRF6,ITGB3,LOXL2,Ly6a (includes others),MMP13,MMP14,MMP2,MMP9,NCK1,NR4A1,RHOC,RUNX2,SOCS2,SORBS3,THBS1,VIM	304 (16)
	CNR1		G-protein coupled receptor	Inhibited	-2.003	0.0105	ADORA1,BCL11B,BDNF,ERRFI1,MMP13,NTN1,PDGFRA,PDGFRB,PECAM1,PTK6,SLC29A1,SLIT2,SMURF1
	MECOM		transcription regulator	Inhibited	-2	0.00183	CEBPA,ITGA2B,ITGB3,Ly6a (includes others),SPARC,TCF4
	Fgf		group	Inhibited	-2	0.0127	ACE,MMP2,MMP9,PER1,RUNX2
	TERF2IP		other	Inhibited	-2	0.0134	CCN2,IGF2,SLIT3,TRABD2B
	FOXF1		transcription regulator		-1.994	0.0114	CACNA1C,ITGB3,MYLK,PDGFRA
	DDR2		kinase		-1.988	0.000883	LOXL2,MMP13,MMP14,MMP2	253 (12)
	F2RL1		G-protein coupled receptor		-1.988	0.0198	ACTA2,BDNF,CCN1,CCN2,GBP6,HBEGF,MMP9
	BMP2		growth factor		-1.985	0.000303	Acan,ACTA2,ATP2C2,BGLAP,COL10A1,COL2A1,CREB3L1,CSF1,CTSK,DMP1,FGFR1,IFI16,MMP13,MMP9,MRAS,NOS3,PTH1R,RUNX2,SLC26A2,SPARC,TAGLN	358 (19)
	POU5F1		transcription regulator		-1.983	0.00174	BNIP3L,CDH2,CRABP2,CST6,DSP,EPCAM,FARP1,GADD45A,GRHL3,IRF6,KLF2,KRT17,LOXL1,MMP2,MMP9,NFATC4,OVOL1,PDGFRA,PECAM1,PPL,PYCARD,SNAI2,Sprr2b,Sprr2h,TGFB3,TP73,VIM	283 (12)
	CTF1		cytokine		-1.982	0.00464	CEBPD,LBP,MYLK,PNPLA2,SRF,TAGLN	164 (7)
	SMARCC1		transcription regulator		-1.982	0.0182	CD79A,CD79B,EBF1,TCF3
	SSTR2		G-protein coupled receptor		-1.982	0.021	CDH2,MMP9,THBS1,VIM
	REN		peptidase		-1.982	0.0307	ACE,CCN2,COL3A1,CYP2J2
	RETNLB		other		-1.976	3.48e-05	ACTA2,BMP1,CCN2,ELN,FGFR1,FZD6,MID1,MMP2,Nnt,NR4A1,SOCS2,THBS4,TINAGL1	353 (13)
	WNT7A		cytokine		-1.973	0.0182	CDH2,MMP9,RUNX2,VIM
	D-glucose		chemical - endogenous mammalian		-1.972	0.000359	Acan,ACE,ACE2,ACSL1,ACTA2,AQP1,ATP2A3,CACNA1C,CCN2,CDT1,CEBPA,COL2A1,COL3A1,COL4A1,DBI,FABP5,FUT1,GPLD1,IGF2,ITPR3,JAG1,LAMC1,MCAM,MMP13,MMP14,MMP2,MMP9,MYL9,NOS3,NR4A1,Orm1 (includes others),PDCD4,PDGFRA,PDGFRB,PIGA,PNPLA3,PTGIS,RUNX2,SCD,SERPINB5,SLC29A1,SLC39A6,SLC5A1,SQSTM1,SUSD2,TAGLN,TGFB3,THBS1	406 (20)
	leuprolide		biologic drug		-1.969	0.00788	MMP14,MMP2,MMP9,NR4A1	357 (22)
	IL-1R		group		-1.969	0.0272	COL3A1,MMP13,MMP14,MMP9
	Collagen Alpha1		group		-1.966	0.00241	CDH2,MMP2,MMP9,TIMP2	323 (18)
	ITGA5		transmembrane receptor		-1.964	0.0181	CDH2,COL2A1,IGF2,MMP14,MMP2,MMP9
	CAV1		transmembrane receptor		-1.964	0.0469	CAVIN1,CD276,CLDN8,NOS3,NR4A1,SLC12A2,SLC20A1,SNAI2,TGFB1I1,THBS1,VIM
	HULC		other		-1.963	0.00952	CDH2,NOS3,SQSTM1,VIM
	CD47		transmembrane receptor		-1.96	0.0307	Acp5,CCL19,CSF1,CTSK
	PTH		other		-1.959	0.00117	Acan,Acp5,BGLAP,CCN2,CGNL1,COL2A1,CSF1,DMP1,ESAM,MGP,MMP13,MMP2,NFIL3,NR4A1,PTH1R,RUNX2,THBS4	328 (21)
	VCL		enzyme		-1.949	0.000208	Acan,COL10A1,COL2A1,RUNX2	225 (7)
	Pkc(s)		group		-1.945	8.77e-05	ACTA2,BCL11B,BDNF,CACNA1C,CCN1,CCN2,CLDN1,COL3A1,CYP1A1,DBP,GADD45A,GRHL3,IGF2,IRF6,MMP13,MMP2,MMP9,NR4A1,OVOL1,PER1,RB1,TAGLN,TP73	336 (20)
	5-N-ethylcarboxamido adenosine		chemical reagent		-1.944	0.017	CCN2,CDKN2B,CEBPD,EPCAM,GADD45A,NFIL3,NR4A1,PLK2,ST3GAL1,THBS1
	TEAD3		transcription regulator		-1.941	6.35e-05	ACTA2,BBOX1,CCN1,CCN2,COL3A1,COL5A2,LOXL1,TAGLN,THBS1,TP63
	collagen type i (family)		group		-1.936	0.0307	CDH2,MMP13,SPARC,TGFB1I1
	sorbitol		chemical - endogenous mammalian		-1.934	0.00241	AQP1,CCN1,CCN2,ERRFI1	250 (7)
	ZNF503		other		-1.929	0.0272	EBF1,GATA3,RASGRP2,ZNF521
	PRKCD		kinase		-1.924	0.00148	ARHGAP32,C3orf52,DENND3,FBN1,GEM,GRHL2,HJURP,ITPR3,KLF5,LYST,MMP13,MMP2,MMP9,MPZ,NR4A1,OSR2,PDCD4,PDLIM7	336 (21)
	PTGS2		enzyme		-1.912	0.00673	AQP1,CTSK,CXCL14,ERBB3,HBEGF,Krt10,LTBP1,MMP14,MMP2,MMP9,NOS3,NTN1,RUNX2,ST3GAL1,TEK,TNFAIP6	400 (20)
	ursodeoxycholic acid		chemical - endogenous mammalian		-1.912	0.0213	CCN2,COL4A1,CYP1A1,DLC1,MAF,PDGFRB,SPARC
	FGF2		growth factor		-1.904	3.53e-10	ACE,ACTA2,ADAMTS5,BDNF,BGLAP,BGN,CCN1,COL3A1,CSF1,CTSK,CYGB,DMP1,EGLN3,ELN,EPCAM,EPHA4,ERRFI1,FBN1,FGFR1,FUT2,GADD45A,HBEGF,IGF2,IGFBP4,MBP,MCAM,MGP,MMP13,MMP2,MMP9,MPZ,NOS3,NR4A1,PDGFRA,PDGFRB,PLAT,PLK2,RB1,REXO1,RUNX2,SCD,SLC20A1,SNAI2,SPARC,SQSTM1,ST3GAL1,TAGLN,THBS1,VIM	410 (22)
	IL17A		cytokine		-1.901	6.01e-07	ACTA2,CAMP,CCN1,CCN2,CDH2,CEBPD,COL10A1,COL2A1,CTSK,GADD45A,HBEGF,IL36G,JAG1,KLF2,KLF3,KRT17,LCN2,MAP3K1,MMP13,MMP2,MMP9,NOS3,NTN1,PECAM1,PRDM1,SPSB1,TIMP2,TNFSF12,TP63,VIM,WFDC5	398 (17)
	lipopolysaccharide		chemical drug		-1.898	5.95e-13	ACE,ACE2,ACSL1,ACTA2,ADORA1,ADRA2A,ALDH3A1,ALOX12,ANKRD22,AQP1,AXL,BDNF,BGN,BLZF1,C1R,CALML5,CAMP,CAVIN1,CCL19,CCL21,CCN1,CCN2,CCNG2,CCR3,CD276,CDH2,CEBPA,CEBPD,CHST3,CLDN1,CLDN5,COL3A1,COL4A1,COL4A2,COL5A1,COL5A2,COL5A3,COL6A1,CRTAP,CSF1,CTSK,CXADR,CXCL14,CYP1A1,DGAT1,DHCR24,Ear2 (includes others),EGFL7,EGLN3,EHF,ELANE,ELL2,ERGIC1,FAAH,FABP5,FBLN2,FBN1,FCGRT,FLOT2,FLT4,FSTL1,GADD45A,GBP6,GEM,GGC…	451 (20)
	5-hydroxytryptamine		chemical - endogenous mammalian		-1.897	0.0296	BDNF,CCN2,HBEGF,ITGA2B,MMP13,NOS3,NR4A1,RUNX2,THBS1,TUBA8
	bexarotene		chemical drug		-1.891	0.0209	AXL,BCL11B,CCN1,CEBPG,DEPP1,IGFBP6,KRT15,KRT17,LOXL2,MAF,MMP9,PLAT,SCD,SPARC,TSC22D3
	BNIP3L	0.534	other		-1.89	0.0142	CD19,CD79B,CENPF,GADD45A,ITPR3,PDGFRB,TIMP2
	TWIST1		transcription regulator		-1.855	2.67e-11	Acan,ACTA2,APOD,AXL,BGLAP,C1QTNF1,CDH2,COL2A1,COL6A1,DNM1,EMILIN1,EPCAM,IGFBP4,ITGB3,LRG1,MMP2,MXRA8,OLFML3,PCOLCE,PDGFRA,PDZD2,PRRX2,RHOC,RUNX2,SLC29A1,SNAI2,SPOCK2,TCF3,THBS2,VIM	359 (23)
	IL7		cytokine		-1.85	0.00172	CD19,CSF1,CTSK,EBF1,GATA3,IGHM,KLF2,Ly6a (includes others),MAF,MMP13,MMP9,NTN1,RUNX2,S1PR1,TCF3	326 (18)
	S100A4		other		-1.806	0.000434	CCL19,MMP13,MMP14,MMP2,MMP9,THBS1,TIMP2,VIM	333 (18)
	GATA2		transcription regulator		-1.798	1.04e-07	CAMP,CCL21,CCR3,CD34,CEBPA,CTSG,CYP2F1,Ear2 (includes others),ELANE,EPX,ERG,FCER1A,FCN1,GATA3,GP5,GPX3,GZMA,IGFBP7,ITGA2B,KLF2,LCN2,Ly6a (includes others),MMP2,MMRN1,NFIL3,NOS3,PECAM1,PLB1,PLK2,Ppbp,PRG2,PRRG4,Prss34,Retnlg,S1PR3,SLC22A4,SLC4A1,Stfa1 (includes others),Stfa3,THBS1,TPSAB1/TPSB2,TRIM10,TUBA8
	SKI		transcription regulator		-1.796	0.000336	ACTA2,BCL11B,MBP,MPZ,PMP22,PRX
	HSPG2	-0.444	enzyme		-1.789	0.000748	Acan,ACTA2,COL10A1,COL2A1,GADD45A,RB1CC1,SQSTM1	205 (7)
	mir-21		microRNA		-1.762	0.000287	ACTA2,C1R,CCL19,CD19,CDKN2B,COL3A1,DBP,ECT2,ELN,GATA3,GBP6,IFI16,IGHM,IL18,IL36G,JAG1,MMP2,MMP9,Orm1 (includes others),PDCD4,PECAM1,PLAT,PPP4R3B,PRRG4,SERPINB5,SOD3	334 (17)
	NAMPT		cytokine		-1.761	0.00255	AXL,BDNF,CCR3,MMP9,PDGFRB,PECAM1,SOCS2	343 (12)
	SNAI2	0.604	transcription regulator		-1.757	1.09e-08	Acan,AXL,BGLAP,CCN1,CCN2,CDH2,CLDN1,COL2A1,DSP,EPCAM,MMP14,MMP9,RUNX2,SNAI2,TP63,VIM	233 (19)
	TEAD4		transcription regulator		-1.755	4.83e-06	ACTA2,BBOX1,CCN1,CCN2,CD34,CEBPA,COL3A1,COL5A2,FGFR1,GATA3,LOXL1,PLK2,RB1,TAGLN,THBS1,TP63	141 (7)
	SMAD3		transcription regulator		-1.743	5.21e-11	ACTA2,ADORA1,BGLAP,BGN,CCN2,CCNG2,CD79A,CDH2,CDKN2B,COL10A1,COL2A1,COL3A1,COL6A1,COL6A3,CYP1A1,ELN,ENG,GATA3,GZMA,HBEGF,JAG1,JUND,LPAR1,Ly6a (includes others),MBOAT2,MMP13,MMP9,Orm1 (includes others),RUNX2,S1PR1,S1PR3,SNAI2,SPARC,TAGLN,TGFB3,THBS1,THBS4,TPSAB1/TPSB2,VIM	343 (18)
	AKT1		kinase		-1.739	0.000103	Acan,ACTA2,CEBPD,COL4A1,CXCR6,DHCR7,FABP5,FSTL1,IGF2,JUND,LCN2,MBP,MMP14,MMP2,MMP9,PCOLCE,PDGFRA,PDGFRB,PLA2G2F,RAB11A,SCD,SNAI2,SRF,THBS1,THBS2,TP63,TP73,VIM	335 (20)
	PTN		growth factor		-1.732	2.24e-05	BDNF,COL10A1,COMP,ITGB3,MBP,MMP13
	NAE1		enzyme		-1.732	0.00241	CDK5RAP1,CDKN2B,RB1,TP63
	MAPK1		kinase		-1.73	3.08e-07	ADH1C,AKAP12,BCL11A,BDNF,BGLAP,BLZF1,CCN2,CDH2,CHST2,CRABP2,CRYBG1,DMP1,EGLN3,EPCAM,FAT2,GATA3,GDPD3,GRB7,HBB,IFI16,IGFBP6,IGFBP7,ITGA2B,ITGB3,JUND,KRT17,LAMA4,LAP3,MBP,MMP13,MMP2,MMP9,NR4A1,S1PR3,SCNN1A,SLITRK6,SOCS2,SPSB1,SRF,VIM	333 (16)
	aldosterone		chemical - endogenous mammalian		-1.73	0.0183	ACE,BDNF,CCN2,COL3A1,ELN,ERGIC1,LCN2,MMP2,PER1,SCNN1A,SLC12A2,TPRG1,TSC22D3
	SMAD4		transcription regulator		-1.72	8.56e-07	Acan,ACKR1,BGLAP,BGN,CCN2,CCNG2,CD79A,CDH2,CDKN2B,COCH,COL10A1,COL2A1,CSF1,ENG,GADD45A,JAG1,LPAR1,MMP13,NPR2,OVOL1,PAK3,PDGFRB,RNF220,RUNX2,SCD,SNAI2,THBS1,TNFAIP6,VIM	333 (20)
	CEBPD	-0.642	transcription regulator		-1.711	0.00412	CEBPD,COL10A1,CYP1A1,MBP,MMP13,MPZ,PDGFRA,RB1,SLC5A8,SNAI2,TNFAIP6	154 (10)
	DEF6		other		-1.693	7.44e-05	CDH2,MMP2,MMP9,PRDM1,SNAI2,VIM	220 (12)
	kainic acid		chemical toxicant		-1.679	0.044	APOLD1,BDNF,CACNA1C,ERRFI1,HBEGF,IL18,JUND,LCN2,MMP9,NFIL3,NR4A1,PER1
	PLAG1		transcription regulator		-1.673	0.0302	AQP1,CREB3L1,IGF2,LSP1,PPIC,TPSAB1/TPSB2
	MDM2		transcription regulator		-1.671	0.00055	CLIP3,FCGRT,HBP1,IGFBP6,Krt10,LRMDA,POLH,SNAI2,THBS1,TP63,TP73	256 (9)
	NSUN6		enzyme		-1.667	3.22e-05	AXL,CCN1,CCN2,EMP2,FSTL1,HMMR,LHFPL6,PMP22,THBS1
	tetrachlorodibenzodioxin		chemical toxicant		-1.667	5.52e-05	ALDH3A1,BDNF,CCL21,CCN1,CHST2,COL18A1,COL6A1,CYP1A1,DSC2,EBF1,ELN,ERBB3,HDAC11,IGF2,IGHM,JAG1,JUND,KLF2,LYST,MICOS10-NBL1/NBL1,MMP13,MMP14,NPTX1,PERP,PRDM1,S1PR1,SERPINB5,SERPINH1,SOCS2,SPOCK2,TGFB3,TIMELESS,TP73,TUBA8	369 (20)
	CLEC4G		other		-1.667	0.000684	CCN2,CSF1,EBF1,ELL3,HBEGF,IGF2,NRARP,TGFB3,THBS4
	garcinol		chemical - endogenous non-mammalian		-1.667	0.0143	BLZF1,EEF1AKMT3,KDM5B,MAF,PERP,PLAT,TCF7L1,TP63,VAV3
	cardiotoxin		chemical - other		-1.667	0.0185	BGN,COL6A2,CSF1,FGFR1,GNAI3,IGF2,IGFBP7,IL18,IL36G,LCN2,LRG1,LTBP1,MMP13,MMP2
	CEBPB		transcription regulator		-1.664	2.56e-06	ACTA2,ADH1C,BDNF,BGLAP,CDKN2B,CDT1,CEBPA,CEBPD,CIRBP,COL10A1,COL5A2,CYP1A1,DEGS1,DHCR7,DMWD,DYNLT1,ELANE,ENTPD2,GADD45A,HBB,IGFBP4,KRT15,LAMC1,LBP,LCN2,MBP,MGP,MMP13,NDRG4,Orm1 (includes others),PDGFRA,PRDM1,PRG2,RORA,RUNX2,SBSN,SCD,SLC12A2,TMEM176B,TNFAIP6,VIM	399 (20)
	HSPA9		other		-1.664	0.00776	CRABP2,MMP13,MMP2,MMP9,TIMP2,VIM	273 (12)
	POSTN		other		-1.655	4.93e-05	ACTA2,BGLAP,LOXL1,LOXL2,MMP13,MMP2,MMP9,RUNX2,VIM	322 (18)
	SDCBP		enzyme		-1.655	0.000548	CLDN1,MMP2,MMP9,SNAI2,TCF4,VIM	309 (16)
	SMAD2		transcription regulator		-1.648	7.64e-07	Acan,ACTA2,BGLAP,BGN,CCN2,CCNG2,CDH2,CDKN2B,COL2A1,MMP13,MMP2,MMP9,NOS3,RUNX2,S1PR1,SNAI2,THBS1	355 (19)
	SHH		peptidase		-1.638	0.0129	CCNG2,COL10A1,DAAM1,EBF1,IGF2,NOS3,NR4A1,PDGFRA,PLAT,PMP22,RUNX2,SLC29A1,SNAI2,TGFB3,TSC22D3
	TIMP1		cytokine		-1.633	0.00299	CTSG,IGF2,MMP2,MMP9,PLAT,TIMP2	290 (16)
	ascorbic acid		chemical - endogenous mammalian		-1.622	0.000683	Acan,BGLAP,DMP1,IGFBP4,ITGB3,MGP,MMP13,PMP22,RUNX2,SLC20A1,SPARC	344 (20)
	triamcinolone acetonide		chemical drug		-1.614	0.000284	ACSL1,ANGPTL7,AQP1,CD79B,CHL1,CRYBG1,CXADR,EPHA4,ERG,GZMA,IGFBP4,LSP1,MARVELD2,MMP13,PER1,PEX13,PLK2,SCD,SOCS2,TNFAIP8,TSC22D3	359 (12)
	HIF1A		transcription regulator		-1.589	1.86e-05	ACTA2,AKAP12,AXL,BGN,BNIP3L,CCN1,CCN2,CDCP1,CDH2,CLDN1,CSF1,CYP1A1,EGLN3,ENG,ERGIC1,FAM162A,IGF2,ITGA2B,ITGB3,LOXL2,MAF,MMP13,MMP2,MMP9,NOS3,NR4A1,NRARP,PTGIS,PTK6,SLC29A1,SNAI2,ST3GAL1,TCF4,TGFB3,THBS1,TMEM45A,TMEM79,VIM,ZDHHC9	349 (22)
	CCN1	-0.865	other		-1.584	0.00382	CCN1,IL18,ITGB3,MMP2,MMP9,NR4A1,PECAM1,TCF7L1,TIE1,TIMP2	314 (19)
	Vegf		group		-1.574	3.14e-07	ACE,ACTA2,ADGRF5,AKAP12,ANGPTL7,C1QTNF1,CCN1,CENPF,CLCF1,CLDN1,DENND2D,DOK4,EHF,ELN,EMP2,EPHA4,ERBB3,FLT4,GBA2,GEM,GRB10,HBEGF,HMMR,IGFBP4,IL18,ITPR3,LCN2,LPAR1,MALL,MGP,MGST2,MID1,MMP13,MMP14,MMP2,MMP9,NOS3,NR4A1,NRARP,PIK3CB,PKDCC,PLPP3,PLVAP,PMP22,SLC20A1,SOCS2,VAV3,VIM	341 (18)
	EPO		cytokine		-1.556	0.00905	ADAMTS10,BDNF,BNIP3L,CA1,CCL19,CCNG2,CTSK,DHCR24,FABP5,GATA3,HBB,IGF2,IL18,MMP2,NOS3,OSBPL1A,PDCD4,Podxl,SLC4A1,SOCS2,TIE1,TSC22D3	384 (18)
	NOTCH1		transcription regulator		-1.548	5.97e-08	ACTA2,ADAM19,BGLAP,CCN1,CCN2,CEBPA,CEBPD,CTSG,ECT2,ELANE,EPHA4,ERBB3,GATA3,IFI16,IGFBP4,IL18,ITGA2B,JAG1,Ly6a (includes others),MCAM,MMP2,MPZ,MYCL,MYLK,NHLH1,PDGFRB,RB1,RUNX2,TAGLN,TEK,TGFB3,TIE1,TP63	400 (19)
	AXL	-0.419	kinase		-1.546	0.00348	CDH2,IL18,MMP2,MMP9,SNAI2,VIM	376 (20)
	IL22		cytokine		-1.533	0.000838	ACTA2,CALML3,CALML5,CAMP,CLDN1,HBEGF,IL36G,KRT1,KRT17,LBP,LCN2,MMP9,PLA2G2F,TGM3,WFDC5	188 (9)
	SOX10		transcription regulator		-1.533	0.0112	ERBB3,MBP,MPZ,PMP22,SOD3
	CCR1		G-protein coupled receptor		-1.526	1.22e-05	Acp5,CTSK,ITGB3,MMP2,MMP9,RUNX2,SPARC,VIM	413 (20)
	ZNF106		other		-1.522	0.0397	ALDH3A1,MPZ,PMP22,PRX,VPS35
	SPI1		transcription regulator		-1.505	0.019	Acp5,ACTA2,BCL11A,CD19,CD79A,CD79B,CEBPA,CSF1,CTSK,EBF1,ELANE,EPX,FCER1A,FCGRT,IL18,MBP,MMP2,PRDM1,PRG2,VIM
	beta-glycerophosphoric acid		chemical - endogenous mammalian		-1.499	2.59e-05	Acan,BGLAP,DMP1,MGP,RUNX2,SLC20A1,SPARC	87 (6)
	dihydrotestosterone		chemical - endogenous mammalian		-1.493	4.23e-07	ACP3,Acp5,ADH1C,APOD,AQP1,BGN,CCN2,CDH2,CEBPA,COL3A1,COL4A1,COL5A2,COL5A3,COL6A1,CST6,DBI,DHCR24,ELN,ELOVL7,ERG,FGFR1,FZD6,GPRIN2,GPX3,GRB10,HOMER2,IGFBP4,IGFBP7,JAG1,KRT1,LTBP1,MAF,MCAM,MGLL,MMP13,MMP2,MMP9,MYLK,NOS3,NR4A1,PDCD4,PER1,RASSF9,RB1,RUNX2,SCD,SLC1A5,SNAI2,SOD3,SPARC,THBS1,TIMP2,VIM	437 (22)
	LPAR1	-0.563	G-protein coupled receptor		-1.491	0.000211	CCN2,KLF5,MMP9,PRKCG,S1PR3	288 (15)
	NFAT5		transcription regulator		-1.488	0.0268	Acan,AQP1,C1QTNF1,C1QTNF6,C2,IGFBP7,LCN2,PLAT,PTGIS
	IL32		cytokine		-1.478	0.0352	CTSK,MMP13,MMP2,MMP9,SNAI2,VIM
	WT1		transcription regulator		-1.474	0.000219	CCN2,CIRBP,COL4A1,CSF1,CUL4B,FGFR1,GRB10,HBEGF,HSPG2,IGF2,JUND,MMP13,MMP14,MMP2,MMP9,PECAM1,Podxl,SLC20A1,SNAI2,SQSTM1,TGFB3,THBS1,ZDHHC9	272 (11)
	E. coli serotype 0127B8 lipopolysaccharide		chemical - endogenous non-mammalian		-1.474	0.0282	ADORA1,ADRA2A,AQP1,BDNF,CCN2,ELN,KLF2,LAMB2,LAMC1,LCN2,NOS3,P2RY1,S1PR3,SOD3
	FGFR1	-0.495	kinase		-1.473	1.27e-05	Acan,ADAMTS5,BGLAP,COL10A1,COL3A1,FGFR1,H60b/H60c,MBP,MMP13,MMP14,NCK1,PDCD4,Skint1,SPARC,VIM	358 (20)
	MUC4		other		-1.467	0.00103	CDH2,ERBB3,MMP9,PRKCG,VIM	253 (9)
	RARG		ligand-dependent nuclear receptor		-1.463	0.04	CCN2,COL4A1,CRABP2,GJB4,IGFBP6,Ly6g6e,NTN1,Serpinb6c
	CALR		transcription regulator		-1.461	0.0122	CDH2,CEBPA,COL3A1,CRABP2,GJC1,SCNN1A
	EP300		transcription regulator		-1.45	0.00888	ACOXL,AKAP12,CCNG2,CD19,CDKN2B,CEBPA,COL2A1,CRABP2,CYP1A1,DUSP22,EDARADD,GATA3,HBB,HDAC11,IGFBP6,IRF6,MAF,Nebl,NR4A1,NTN1,PDGFRB,PERP,RAPGEF4,RB1,RNF39,RUNX2,SERPINB5,SPSB1,TMPRSS4,TUBA8	393 (19)
	TP53		transcription regulator		-1.443	8.16e-11	ACE,ACSL1,ACTA2,ADAMTSL4,AKAP12,APBB2,ARAP2,BDNF,BGLAP,BICD2,BLZF1,BMP1,C2,CAPNS1,CCN1,CCN2,CCNG2,CDT1,CEBPA,CEBPD,CENPF,CHMP4C,COL18A1,COL2A1,COL3A1,COL4A1,COL4A2,COL5A2,COL6A2,CPOX,CSF1,CTSK,CXCR6,Cyb5r3,CYP1A1,DBI,DBP,DHCR24,DHCR7,DLC1,DNAJB5,DNM1,DPEP1,DSC3,EMILIN1,ENG,FABP5,FAT2,FBLN2,FGFR1,FSTL1,FUT1,FZD6,GADD45A,GAL3ST4,GPRC5C,GPX3,HBEGF,HJURP,HMMR,HSPG2,IFFO1,IFI16,IGF2,IGFBP4,IGFBP7,IPO7…	446 (23)
	TEAD1		transcription regulator		-1.442	0.000242	ACTA2,BBOX1,CCN1,CCN2,COL3A1,COL5A2,LOXL1,RB1,TAGLN,THBS1,TP63	262 (10)
	FOXM1		transcription regulator		-1.442	0.017	ACE,ACE2,CDH2,CENPF,IPO7,LAMA4,MMP2,MMP9,PECAM1,SNAI2,SQSTM1,VIM
	L-glutamic acid		chemical - endogenous mammalian		-1.437	0.00135	ACTA2,BDNF,CACNA1C,CDH2,CLDN1,CLDN5,IL18,MGLL,MMP2,MMP9,NFIL3,PER1,RUNX2	346 (20)
	SOX6		transcription regulator		-1.432	0.00378	Acan,COL2A1,HSPG2,MYL9,RUNX2
	GATA4		transcription regulator		-1.431	2.51e-05	ACE2,ADORA1,CACNA1C,CCN2,CDKN2B,CEBPG,CLDN1,COL3A1,CRABP2,CXCR6,GATA3,GRHL3,IFI16,IRF6,KRT17,LTBP2,OVOL1,PPL,PRDM1,Sprr2h,TAGLN,THBS4,VIM
	ROR1		kinase		-1.426	5.6e-06	AXL,CCN1,CCN2,EMP2,FSTL1,LHFPL6,SNAI2,THBS1,VIM	255 (9)
	SMARCA4		transcription regulator		-1.414	5.83e-12	ACE,ACE2,ACTA2,BGLAP,BNIP3L,CCDC9B,CCN2,CD19,CDKN2B,CLCF1,CLK1,CRYBG1,CSF1,CUL4B,CXCR6,CYP1A1,DYNLT3,EBF1,EHF,EPHA4,FUT1,GADD45A,GJB5,GNAI3,HBB,IFI16,IGFBP4,IGFBP7,IL20RB,IL36B,IRF6,KRT15,LOXL2,MBP,MGP,MMP2,MPZ,MYBPH,MYLK,NOS3,OXCT1,PARVA,PERP,PHLDB1,PLAT,PLEKHG2,PLPP3,RAB38,RALBP1,RUNX2,SEMA3B,SERPINB5,SERPINB7,SERPINB8,SERPINH1,SLC43A3,SOCS2,SOD3,ST3GAL1,TAGLN,TCF4,THY1,TIMP2,TMCC3,TMEM154,TMPR…	371 (16)
	miR-141-3p (and other miRNAs w/seed AACACUG)		mature microRNA		-1.413	0.00136	CDH2,EPCAM,GADD45A,GRB7,IRF6,JAG1,MMP2,PERP,TP73,VIM	271 (12)
	TRAF3IP2		other		-1.41	2.35e-06	ACE,CAMP,CCL21,CCN2,CCR3,CEBPD,COL3A1,CSF1,GATA3,IL18,LCN2,MMP2,MMP9,TP63	382 (15)
	GLI2		transcription regulator		-1.408	0.017	COL10A1,GATA3,JAG1,KRT1,KRT17,MMP13,MMP9,NTN1,RUNX2,VIM
	FGF8		growth factor		-1.4	0.00255	BGLAP,COL18A1,CRIP1,DTX3,ELL2,ERRFI1,FGFR1,RUNX2,SPARC,THBS1,TRIP6	117 (4)
	BACH2		transcription regulator		-1.398	0.0142	EGLN3,FAM20C,GATA3,LAMC1,MAF,MYCL,PRDM1
	MYB		transcription regulator		-1.393	0.00192	CARNS1,CD34,CDH2,CDKN2B,COL4A1,ELANE,ESAM,GATA3,IGF2,ITGA2B,LCN2,MFAP3L,Ppbp,SLC1A5,SNAI2,SOCS2,VIM	265 (7)
	SPARC	-0.999	other		-1.387	0.000895	CCL19,CEBPD,CLDN1,CYP1A1,FANCB,MMP2,NIPAL1,PLET1,SNAI2,SPARC,THEM5,TMEM45A,VIM	325 (20)
	Saa3		other		-1.387	0.00378	DMP1,MMP13,MMP2,MMP9,RUNX2	113 (8)
	ERBB3	0.597	kinase		-1.358	3.47e-09	ACTA2,ADAM19,AXL,BGN,CCN1,CCN2,CCNG2,COL6A1,CTSK,EMP2,ERBB3,FBLN2,FBN1,FSTL1,HBEGF,HMMR,IGF2,LAMA4,LHFPL6,NID1,SPARC,THBS1	348 (19)
	TCF3	-0.401	transcription regulator		-1.357	0.00324	CD79A,CD79B,CDKN2B,Clec2d (includes others),CXCR6,EBF1,ECT2,ELANE,EPCAM,ESCO2,GADD45A,GATA3,GPLD1,HMMR,IFI16,IGHM,JUND,KLF2,Ly6a (includes others),MAF,NFIL3,PRDM1,RASGRP2,RORA,S1PR1,SEMA3G,SLC12A2,TCF3	117 (6)
	bucladesine		chemical toxicant		-1.354	7.5e-05	Acan,ALDH3A1,BDNF,BGLAP,CAMP,CDH2,CHST2,CLCF1,EGLN3,EPHA4,ERRFI1,FAAH,FCER1A,FGFR1,GEM,HAS1,IGF2,IGFBP6,MCAM,MMP13,MMP14,MMP2,MMP9,NR4A1,PDGFRA,PLK2,PTH1R,SLC9A3R2,SOX7,TGFB3,TIMP2,TINAGL1	402 (20)
	LEP		growth factor		-1.35	0.00408	ACE,ACER1,ACTA2,BDNF,BGLAP,CCN1,COL2A1,COL3A1,COL4A1,CYP2F1,DGAT1,FAAH,FGFR1,FMO5,GADD45A,JUND,LCN2,MBP,MMP13,MMP14,MMP2,MTA1,NOS3,NPR2,PECAM1,PLAT,PNPLA2,RUNX2,SC5D,SCD,SPARC,THBS1,VIM	405 (23)
	FGF7		growth factor		-1.345	0.000242	CEBPA,CEBPD,CSF1,FABP5,FGFR1,MMP13,MMP2,MMP9,NFE2L3,RUNX2,SCD	352 (18)
	Focal adhesion kinase		group		-1.342	0.00153	CDH2,DSP,MMP13,MMP2,MMP9,TAGLN	336 (21)
	CEBPE		transcription regulator		-1.335	1.55e-05	CAMP,ELANE,EPX,IL18,LCN2,MBP,MMP2,MMP9,Orm1 (includes others),PRG2,Retnlg
	NFkB (complex)		complex		-1.33	5.01e-05	ADRA2A,AQP1,BCL11A,BDNF,C1R,CAMP,CAPNS1,CCN1,CCN2,CEBPD,CLCF1,COL18A1,COL2A1,CSF1,Cyb5r3,DBP,DTX3,EHF,ELL2,EPCAM,FABP5,GADD45A,GATA3,GFPT2,IL18,JAG1,KLF3,KRT17,LCN2,LGALS7/LGALS7B,LSP1,MMP13,MMP2,MMP9,MTA1,MYLK,NUMBL,PECAM1,PLK2,PRDM1,SLC22A4,SLC2A12,SLIT2,SNAI2,SOD3,TGFB3,TIMP2,TNFAIP6,TNFAIP8,VIM	439 (21)
	4-hydroxytamoxifen		chemical drug		-1.323	0.0271	CAPNS1,CCN1,CCN2,CEBPA,CEBPD,CHST2,COL16A1,CYP1A1,ERRFI1,FGFR1,MICOS10-NBL1/NBL1,RB1,SNAI2,TUFT1
	ICAM1		transmembrane receptor		-1.319	0.0302	ACTA2,CDH2,COL4A1,MMP9,SNAI2,VIM
	JAG1	0.559	growth factor		-1.315	8.88e-05	ACTA2,CDKN2B,ITGB3,MMP9,PDGFRB,RUNX2,SNAI2,TAGLN,TGFB3,VIM	303 (17)
	PDGFB		growth factor		-1.308	0.00658	ACTA2,BGLAP,KLF2,MMP2,MMP9,NR4A1,PDGFRB,THBS1	356 (21)
	LEF1		transcription regulator		-1.305	0.039	ACTA2,BGLAP,Dst,ELANE,GATA3,GEM,MMP13,MMP2,PRDM1,RUNX2,SH3BGRL2,VIM
	isoprenaline		chemical drug		-1.298	0.000308	ABLIM1,CCN2,HBB,KLF5,MMP9,NR4A1,PER1,PLK2	293 (14)
	PI3K (family)		group		-1.284	0.0239	ACTA2,CCNG2,CDKN2B,EGLN3,KLF2,MMP2,MMP9,SNAI2,THBS1,TP73
	PRMT1		enzyme		-1.276	0.0016	ALOX12,CDH2,CLDN1,IGFBP6,ITGA2B,MBP,SNAI2,VIM	277 (15)
	SOX9		transcription regulator		-1.274	3.45e-05	Acan,CCN2,CDH2,COL10A1,COL2A1,COMP,GDF10,KRT15,LBP,RUNX2,SCGB1A1,SNAI2	324 (16)
	MMP9	-1.38	peptidase		-1.268	3.03e-05	Acp5,ACTA2,CLDN5,COL18A1,CTSK,GADD45A,JAG1,MMP13,MMP14,MMP2,MMP9,TNFSF12,VIM	349 (23)
	tributyltin		chemical reagent		-1.247	3.38e-09	ACSL1,ANGPTL7,CCN2,CEBPA,COL3A1,COL5A1,COL6A1,COL6A2,ELOVL3,GGCT,HTRA3,ITGB3,KRT80,PDGFRA,PDGFRB,PEAR1,PPL,S1PR3,SOD3,SYNPO,THBS1,THBS2,ZNF423	213 (7)
	LRP6		transmembrane receptor		-1.238	0.000152	ACTA2,EPCAM,GATA3,MMP13,MMP14,MMP2,MMP9,PNPLA3,VIM	321 (20)
	NOTCH3		transcription regulator		-1.231	0.001	ACTA2,APOD,COL5A1,MMP9,NRARP,PDGFRB,SNAI2,SPARC,TAGLN	227 (7)
	SOX4		transcription regulator		-1.229	0.00197	CDH2,CSRP3,Dst,GRB7,IGF2,IGFBP4,KLK8,LHFPL6,Ly6a (includes others),MBP,MGST2,PECAM1,PPIC,RNF144A,SLC5A9,TCF3,TMEM176B,VIM
	CCL2		cytokine		-1.229	0.0422	ACTA2,CEBPA,CEBPD,EGLN3,IL18,LCN2,MMP2,MMP9
	EBF1	-0.611	transcription regulator		-1.227	0.00521	CD19,CD79A,CD79B,EBF1,FLOT2,GATA3,IGHM,Ly6a (includes others),NFIL3,PPP1CB,PRDM1,SCD,TCF3	231 (12)
	sphingosine-1-phosphate		chemical - endogenous mammalian		-1.205	3.76e-05	ACTA2,CCN2,CCR3,COL3A1,KLF5,MMP14,MMP9,NOS3,RUNX2,S1PR1,S1PR3,TAGLN,THBS1,VIM	291 (22)
	NFKB1		transcription regulator		-1.203	0.0281	ADORA1,CCL19,CCN1,CCN2,CEBPA,COL2A1,CSF1,EHF,FCGRT,GADD45A,GATA3,GNAI3,IFI16,IGHM,IL18,JAG1,MMP13,MMP9,NR4A1,SNAI2
	TFAP4		transcription regulator		-1.195	0.00123	CCNG2,CDH2,CLDN1,ESRP2,PHYHIP,STEAP3,VIM
	baicalin		chemical - endogenous non-mammalian		-1.195	0.00474	ACE,BDNF,BGLAP,CIRBP,MBP,SPARC,TAGLN
	IL6		cytokine		-1.184	2.81e-05	Acp5,ACTA2,ADAMTS5,BDNF,BGN,CCN2,CCR3,CD79A,CDKN2B,CEBPA,CEBPD,COL2A1,COL3A1,COMP,CSF1,CTSK,CYP1A1,EGLN3,ELANE,EPHA4,ERRFI1,FCGRT,GADD45A,GP5,IFI16,IGF2,IGFBP4,IGFBP6,Ighg2b,IGHM,ITGB3,JUND,LBP,LCN2,LRG1,MAF,MARCHF7,MMP13,MMP2,MMP9,MRAS,NEU3,NOS3,Orm1 (includes others),OSBPL1A,PECAM1,PLAT,PLK2,PRDM1,RB1,RORA,RUNX2,SC5D,SCNN1A,SLC12A2,SOCS2,THBS1,TNS4,VIM	401 (20)
	MRTFB		transcription regulator		-1.18	1.79e-10	ACTA2,BBOX1,CAMP,CCN1,CCN2,COL3A1,COL5A2,CTSG,DHCR24,DMKN,ELANE,EPX,FCN1,GADD45A,LCN2,LOXL1,MGST2,MYL9,P2RY1,PDGFRA,Ppbp,PRG2,Prss34,RAB27B,S1PR1,SLC20A1,SRF,TAGLN,THBS1	55 (4)
	colchicine		chemical drug		-1.178	0.00898	ACTA2,BDNF,CCN2,IL18,JUND,SRF,TMEM123	330 (20)
	TNF		cytokine		-1.176	5.78e-18	Acan,ACE,Acp5,ACSL1,ACTA2,ADAMTS5,ADORA1,AEBP1,AKAP12,ALDH3A1,AQP1,BBOX1,BDNF,BGLAP,BGN,C1QTNF1,CAMP,CAVIN3,CCL19,CCN1,CCN2,CCR3,CDH2,CEBPA,CEBPD,CEBPG,CERS4,CHST2,CLCF1,CLDN5,COL15A1,COL16A1,COL27A1,COL2A1,COL3A1,CSF1,CTSK,CYP1A1,DBI,DCHS1,DENND2D,DENND4A,DEPP1,DGAT1,DSC2,DSC3,EGFL7,EGLN3,EHF,ELOVL7,EMP2,ENG,EPCAM,ERG,FABP5,FAT2,FCGRT,FERMT1,FGFR1,FLT4,GADD45A,GATA3,GBA2,GBP6,GEM,GFPT2,GNAI3,HAS…	396 (20)
	Lh		complex		-1.167	0.00622	ACP3,ACTA2,AKAP12,AXL,BDNF,BNIP3L,COL15A1,COL18A1,DHCR7,GEM,MMP2,MMP9,PER1,PLAT,RUNX2,SLIT2,SMARCD1,THBS1,THBS2,TNFAIP6	425 (21)
	SMAD5		transcription regulator		-1.165	0.0426	CCN2,COCH,CSF1,RUNX2
	MRTFA		transcription regulator		-1.157	1.09e-09	ACTA2,CAMP,CCN1,CCN2,CTSG,DHCR24,DMKN,DSG1,ELANE,ELOVL3,EPX,FCN1,GADD45A,LCN2,MGST2,MMP9,MYL9,MYLK,P2RY1,PDGFRA,Ppbp,PRG2,Prss34,RAB27B,S1PR1,SLC20A1,SRF,TAGLN,THBS1	73 (5)
	COL9A1		other		-1.154	0.00241	COL2A1,COMP,HSPG2,THBS4
	NFIA		transcription regulator		-1.154	0.0272	CDH2,ELOVL3,RUNX2,SLIT2
	CEBPA	0.452	transcription regulator		-1.136	3.28e-06	ACSL1,ADH1C,AKAP12,CAMP,CD19,CEBPA,CEBPD,COL10A1,CRABP2,CSF1,CTSK,DHCR7,DYNLT3,EBF1,ELANE,ERG,GADD45A,GRHL3,IGFBP4,IRF6,KLF5,KLK8,KRT17,LCN2,Ly6a (includes others),MMP13,MMRN1,NFIL3,Orm1 (includes others),OVOL1,PPL,PRDM1,RORA,RUNX2,SBSN,SCD,SCGB1A1,SERPINB5,Sprr2h,THBS1,TNFAIP6,TSC22D3	368 (19)
	streptozocin		chemical drug		-1.136	0.0133	BGLAP,CCN2,CEBPA,COL3A1,COL4A1,FBN1,GPX3,HSPG2,JAG1,MMP2,MMP9,NOS3,PDGFRA,RPS6KA6,RUNX2,SCD,SOD3,VIM
	SMARCB1		transcription regulator		-1.136	0.0352	ACSL1,BGLAP,BNIP3L,CDT1,COL18A1,COL5A2,CSF1,DSC2,GADD45A,HBEGF,IFI16,LBP,SPARC
	KIN001-043		chemical - kinase inhibitor		-1.134	0.000625	COL2A1,CRABP2,GRHL2,IGF2,MMP2,PECAM1,TNS4	346 (20)
	CH-223191		chemical reagent		-1.131	0.0041	ACTA2,COL3A1,CYP1A1,MAF	202 (7)
	VIM	-0.461	other		-1.131	0.0182	AXL,BGLAP,RAB25,SNAI2
	ITGB3	-0.695	transmembrane receptor		-1.128	0.00332	CSF1,ITGA2B,ITGB3,MMP14,MMP2,MMP9,RUNX2,SNAI2,SPARC	317 (23)
	FOSL1		transcription regulator		-1.124	0.00044	AXL,BDNF,CYP2J2,ELN,MMP13,MMP2,MMP9,PRDM1,RUNX2,SNAI2,SPARC	299 (11)
	EPAS1		transcription regulator		-1.119	7.96e-08	AKAP12,AXL,CCN1,CCN2,CDCP1,CEBPA,CLDN1,COL10A1,DGAT1,EGLN3,FBLN2,FMO5,GBA2,ITGA2B,ITGB3,LOXL2,MMP13,MMP14,NEU3,NFIL3,NOS3,NRARP,P2RY1,PTK6,RB1CC1,SLC29A1,TEK,TGFB3,TMEM45A,ZNF423	298 (10)
	Mek		group		-1.119	0.000954	AXL,CCN2,CDCP1,CDH2,EPCAM,ERBB3,FGFR1,GALNT18,ITGA2B,ITGB3,KIRREL1,LAMB2,MAF,MMP13,MMP14,MMP2,MMP9,NR4A1,PDGFRA,PDGFRB,PLPP3,POLR3G,SLC20A1,SLC26A2,SLC43A3,SLC6A14,THBS1,VIM	315 (19)
	calcitriol		chemical drug		-1.118	1.51e-06	ABLIM1,Acp5,ACSL1,ADAM19,AKAP12,BGLAP,CACNA1C,CAMP,CAVIN1,CCN1,CDT1,CEBPA,CEBPD,Clec2d (includes others),COL4A1,COL4A2,CPOX,CSF1,CTSK,CYP1A1,ECT2,EHF,ELN,ERBB3,ERRFI1,FBN1,GADD45A,GATA3,GEM,GIT1,HBEGF,IL18,ISOC2,KLK10,KLK13,KLK8,LCN2,LPAR1,LRRC17,LTBP1,Ly6a (includes others),MAF,OXCT1,PDCD4,RAB38,RB1,RNF144A,SERPINB7,THBS1,TIMP2,TP63,TP73	425 (19)
	HSD11B2		enzyme		-1.103	0.000582	BGLAP,CCN2,SCNN1A,TSC22D3	318 (9)
	dimethyl sulfoxide		chemical drug		-1.098	0.0248	BGLAP,CYP1A1,IFI16,JUND,LCN2,MMP13,PDZD2,PTH1R,RUNX2,SQSTM1,TRIM10
	lovastatin		chemical drug		-1.096	0.024	BDNF,CCN2,DHCR7,FGFR1,GATA3,GPX3,KLF2,MPZ,NOS3,PLAT,RB1,RHOC
	GATA1		transcription regulator		-1.093	0.000188	ALOX12,AQP1,CA1,CAVIN1,CCR3,CEBPA,Clca3a1/Clca3a2,FCER1A,GATA3,HBB,HDAC11,ITGA2B,ITGB3,MBP,MGST2,NFIL3,NRARP,PECAM1,Podxl,PRG2,RNF220,RUNX2,SLC4A1,SPOCK2,TCF4,TEK,TGFB1I1	263 (10)
	DDR1		kinase		-1.091	5.15e-05	CDH2,COL3A1,ELN,MMP14,MMP2,MMP9	285 (16)
	ZFPM1		transcription regulator		-1.091	0.00365	CEBPA,FCER1A,GATA3,GRB10,HBB,ITGA2B,NRARP,PRG2,SH2D4A	65 (3)
	CG		complex		-1.087	0.000266	ACP3,ACSL1,ACTA2,BDNF,CDH2,CEBPA,CEBPD,DBI,DHCR7,EPHB6,FABP5,GBP6,GDF10,GGCT,IGFBP4,ITGB3,MAF,MCAM,MMP2,MMP9,MYCL,NOS3,NR4A1,PECAM1,PLAT,PLPP3,RORA,RUNX2,SBSN,SLC20A1,TNFAIP6	410 (20)
	NKX2-1		transcription regulator		-1.068	2.8e-08	ADGRF5,AKTIP,AQP1,CDKN2B,CEBPA,CYGB,Ear2 (includes others),EMP2,EPHB3,ESAM,GRHL2,IGFBP6,LCN2,LRG1,LSP1,MMP2,MYBPH,PDGFRA,PRRX2,SCARA3,SCD,SCGB1A1,SLC6A14,SNAI2,THBS1,THY1,TP63
	SOX5		transcription regulator		-1.067	0.00179	Acan,COL2A1,HSPG2,RUNX2
	CBL		transcription regulator		-1.067	0.0026	BGLAP,CDKN2B,EPHA4,MMP2,NR4A1,PDGFRA,RUNX2,SQSTM1	368 (18)
	ADCY		group		-1.067	0.00314	CAMP,CDH2,COL3A1,ITGA2B,PER1	142 (7)
	TCF/LEF		group		-1.067	0.00318	MMP2,RUNX2,SNAI2,VIM
	FOSB		transcription regulator		-1.067	0.00464	BDNF,CEBPA,MMP13,MMP2,MMP9,RUNX2	235 (7)
	SULT1E1		enzyme		-1.067	0.0157	ELOVL3,IGFBP4,LCN2,TNFAIP6
	CASP3		peptidase		-1.067	0.0384	CTSK,MMP9,RB1,RUNX2
	MTF1		transcription regulator		-1.044	0.000883	ADAMTS5,MMP13,MMP9,SLC30A1
	FOS		transcription regulator		-1.039	8.81e-08	Acp5,BDNF,BGLAP,BLMH,CAMP,CCN2,CERS4,COL16A1,COL18A1,COL6A1,COL8A2,CRABP2,CYP2J2,DAP,DSG3,EEA1,ELOVL3,FBN1,FSTL1,FZD6,HAS1,HMMR,HOOK1,IFI16,IGFBP6,IL36G,KRT15,Krt2,LTBP1,LTBP2,MMP13,MMP2,MMP9,MMRN1,MPZL2,MYO5B,NFIL3,NPTX1,NR4A1,PIK3CB,PLAT,PLK2,PRDM1,PTH1R,RIPK4,S100a7a,SCD,SEMA3B,SERPINB7,SMURF1,SNAI2,TAOK1,VAV3,VIM	368 (18)
	HDAC3		transcription regulator		-1.039	0.0239	Acan,CD34,CDH2,MMP9,NOS3,PRDM1,SCD,TAGLN,VIM
	TWIST2		transcription regulator		-1.029	0.00105	BCL11A,CDH2,FBLN5,MAF,MMP9,SNAI2,VIM	206 (11)
	25-hydroxycholesterol		chemical reagent		-1.026	0.0213	ACSL1,APOD,FCER1A,GPX3,JUND,NR4A1,SCD
	Creb		group		-1.024	0.0463	ABL2,ACTA2,BDNF,CACNA1C,CAMP,CCN1,CEBPA,CEBPD,FHDC1,GDPD3,IFI16,KRT1,MCAM,MMP2,NOS3,NR4A1,PCOLCE,PER1,PLAT,SLIT2,SYNPO
	BCL2		transporter		-1.021	0.00236	Acan,COL2A1,GADD45A,GZMA,IGFBP6,Ighg2b,MCAM,MMP2,MMP9,PRDM1,SQSTM1,TIMP2	325 (15)
	MSTN		growth factor		-1.02	0.00939	Acp5,ACTA2,BGLAP,CTSK,IGF2,RUNX2,SERPINH1,VIM	353 (17)
	HMGA1		transcription regulator		-1.004	7.58e-05	ACTA2,ARL4A,CCN1,CD19,COL4A1,COL4A2,DHCR7,FSTL1,IGFBP4,IGFBP7,KLF2,Ly6a (includes others),MMP9,PTH1R,SERPINH1,SOD3,SPARC,TAGLN	374 (19)
	LLGL2		other		-1	3.08e-06	AXL,CCN1,CCN2,EMP2,FSTL1,HMMR,LHFPL6,SH2D4A,SLIT2
	RLIM		enzyme		-1	0.000883	CCN2,CDH2,CDKN2B,VIM	135 (8)
	PIAS3		transcription regulator		-1	0.00241	CDKN2B,MMP13,MMP9,TPSAB1/TPSB2	162 (7)
	androgen		chemical drug		-1	0.00644	APOD,BDNF,COL10A1,COL4A2,DHCR24,ERBB3,FUT2,GPT2,KLF5,MMP23B,MMP9,NR4A1,RUNX2,TNFAIP8,VAV3	316 (19)
	FUT8		enzyme		-1	0.0114	ELN,FZD6,IGHM,MMP13
	Zn2+		chemical - endogenous mammalian		-1	0.0114	MMP13,MMP9,SLC30A1,SLC39A6
	LATS1		kinase		-1	0.0307	CCN2,EPCAM,ERBB3,GATA3
	NCOA4		transcription regulator		-1	0.0471	CCN2,EHF,FABP5,JAG1
	miR-124-3p (and other miRNAs w/seed AAGGCAC)		mature microRNA		-0.97	0.00245	ABHD5,AP1M2,BDNF,CCN2,CDC14B,CEBPA,DHCR24,FA2H,GNAI3,HEBP2,ITPRID2,JAG1,LAMC1,NID1,OAF,PDLIM7,POLR3G,SNAI2,TLCD3A,ZBED3
	ELAVL1		other		-0.969	0.0161	ACTA2,APOD,CDH2,CLDN1,DGAT1,GATA3,GBP6,HBB,HOMER2,IFI16,PCOLCE,SQSTM1,TP53INP1,TP63,TSC22D3,VIM
	cigarette smoke		chemical toxicant		-0.959	0.00768	ACTA2,ALDH3A1,CCN1,COL4A2,CYP1A1,DNAJB5,ELN,FABP5,GATA3,GPX3,MAP3K1,MMP2,MMP9,Oas1d (includes others),P2RY4,PRKCG,RAMP2,SOCS2,SOD3,SQSTM1	436 (22)
	TMSB4		group		-0.958	0.00788	BGLAP,DMP1,MBP,RUNX2	297 (14)
	TERT		enzyme		-0.958	0.0489	CCN2,COL5A2,HTRA1,IFI16,IGFBP4,MMP14,MMP2,MMP9,NOS3,RB1,VIM
	SKIL		transcription regulator		-0.956	0.00255	ACTA2,CCL19,COL4A1,CPEB2,DCHS1,SLC1A5,THBS2
	glutamine		chemical - endogenous mammalian		-0.947	0.0412	ACTA2,FABP5,GADD45A,IGF2,NR4A1,SNAI2,THBS2,THEM5,VIM
	Rock		group		-0.943	0.00181	ACTA2,CAVIN1,CCN2,COL3A1,NOS3,RUNX2,TAGLN,THBS1	292 (17)
	N-nitro-L-arginine methyl ester		chemical drug		-0.934	0.0268	ACE,BGN,CCN2,COL3A1,CSF1,ITGB3,MMP9,NOS3,PERP
	TNFAIP6	-1.238	other		-0.928	0.000336	ACTA2,CDH2,MMP9,SNAI2,TNFAIP6,VIM	299 (13)
	APLN		other		-0.928	0.0164	ACE2,CCN2,CD34,ITGA2B,PECAM1,TEK
	PTGS1		enzyme		-0.927	0.0333	GEM,Krt10,MMP2,MMP9,NOS3
	ZEB2		transcription regulator		-0.926	0.000166	AXL,CDKN2B,CTSG,ELANE,ESRP2,FCER1A,FCN1,GZMA,MMP2,VIM
	SIM2		transcription regulator		-0.916	0.000195	CDH2,DBN1,GADD45A,MMP2,SNAI2,TIMP2	163 (7)
	MYOCD		transcription regulator		-0.912	0.0153	ACE2,ACTA2,CACNA1C,COL2A1,COL3A1,GJC1,MYLK,SERPINB5,TAGLN
	TGFBR1		kinase		-0.907	9.66e-05	Acan,ACTA2,BGN,CCN2,CLDN5,FBLN5,JAG1,LTBP1,MMP13,SNAI2,TAGLN,TPSAB1/TPSB2,VIM	350 (17)
	COLQ		other		-0.895	6.25e-13	ADAMTS2,ADAMTS5,BDNF,BGN,BMP1,COL2A1,COL4A1,COL4A2,COL5A2,COL6A3,FBLN5,HSPG2,LAMA4,LAMB2,LTBP1,LTBP4,MMP2,MMP9,NID1,PRELP,TGFB3
	NR3C1		ligand-dependent nuclear receptor		-0.893	2.87e-05	ADH1C,AKTIP,ANGPTL7,AQP1,BDNF,BGLAP,BNIP3L,C1QTNF1,C1R,CCN1,CEBPA,CLCF1,CLDN5,CRABP2,DBI,DEGS1,DUSP22,ERRFI1,GADD45A,GATA3,GEM,GPX3,GZMA,IL18,IL36G,JUND,KRT15,KRT17,LYST,MFSD2A,MMP13,MMP9,NFIL3,NHLH1,NOS3,PDCD4,PER1,PIK3CB,PLK2,PNPLA2,PPP1CB,RAB11A,RAPGEF4,RB1,RNF11,RUNX2,SCNN1A,SGPP1,SNAI2,THBS1,TNFAIP6,TNFAIP8,TNS4,TSC22D3	476 (17)
	OGA		enzyme		-0.892	7.71e-05	ABLIM1,ADAM19,ADAMTS5,CCNG2,CDKN2B,CEBPA,CLDN1,COL10A1,DHCR7,DPEP1,EPHA4,EPHB3,EPHB6,ERBB3,FGFR1,FZD10,FZD6,GADD45A,GALNT7,GDF10,GPT2,IGF2,IGFBP4,IGFBP7,IL18,MCAM,MGLL,MMP14,PLPP3,RB1,SOCS2,TCTE3,THBS1,TIMP2,TP73,VIM	368 (16)
	IL1B		cytokine		-0.884	8.7e-07	Acan,ACP3,ACTA2,ADAMTS5,ASAH2,BGLAP,BGN,C1R,CCN2,CDH2,CEBPA,CEBPD,CEBPG,COL10A1,COL2A1,CSF1,Cyb5r3,CYP1A1,DBI,DBP,EGLN3,EHF,ELN,ENG,ERRFI1,FABP5,GADD45A,GATA3,GBP6,GEM,GRB7,HAS1,HBEGF,HSPG2,IFI16,IGFBP4,IGFBP6,IL18,IL36A,IL36B,ITGB3,JUND,LBP,LCN2,MMP13,MMP14,MMP2,MMP9,MYLK,NFIL3,NOS3,NR4A1,PDGFRA,PLA2G3,PLAT,PLB1,Ppbp,PRDM1,PTGIS,RORA,RUNX2,SCNN1A,SERPINH1,SLC20A1,SLC22A4,SOCS2,SPARC,TGFB3,THBS1,…	417 (19)
	ID1		transcription regulator		-0.881	9.17e-06	CCN2,GATA3,IFI16,IGF2,Ly6a (includes others),MMP13,MMP14,MMP2,MMP9,RUNX2,SCD,THBS1,VIM	339 (20)
	ANGPT2		growth factor		-0.881	0.000416	ACTA2,C1R,COL18A1,COL3A1,FKBP10,FLT4,IL18,KLF5,MMP2,MMP9,NOS3,PDCD4,PDGFRB,SCNN1A,SERPING1,SOD3,SPTLC3,TEK,THBS1,THBS2,VIM	384 (19)
	nitric oxide		chemical - endogenous mammalian		-0.877	0.00938	ACE,CCN2,GADD45A,HSPG2,IL18,MMP13,MMP2,MMP9,NID1,PECAM1,SERPINB5,SQSTM1,THBS1,TIMP2	394 (22)
	TRPS1		transcription regulator		-0.863	0.00123	ACSL1,BGLAP,CENPF,MMP13,MMP2,RUNX2,SERPING1,SNAI2	262 (7)
	INHBA		growth factor		-0.861	0.0042	ACTA2,AMMECR1,CCN2,CDKN2B,ECSCR,EGLN3,MAF,MGP,MMP2,MYCL,PRDM1,SERPINB5,SLC5A8,SMARCD1,TAGLN,TPSAB1/TPSB2,VAV3	316 (16)
	thyroid hormone		chemical - endogenous mammalian		-0.853	0.0294	ACE,ADCY6,BDNF,CDKN2B,Cyb5r3,DBI,FZD6,IGFBP4,IGHM,KLF3,MBP,NHLH1,PER1,VIM
	KCNN4		ion channel		-0.849	0.000582	Acp5,CTSK,MMP9,TSC22D3
	Ras homolog		group		-0.849	0.00167	CCN2,ITGB3,MMP9,NOS3,PDGFRA	411 (22)
	KITLG		growth factor		-0.844	4.74e-05	AXL,BMP1,CCN2,CDKN2B,CEBPA,CSF1,DHCR24,ELANE,FABP5,FGFR1,IGHM,IL18,ITGA2B,ITGB3,MMP2,NOS3,OSBPL1A,PARVB,PDCD4,Podxl,Ppbp,SLC4A1,SNAI2,TCF3,TPSAB1/TPSB2,TSC22D3	331 (19)
	cerivastatin		chemical drug		-0.841	0.0477	CCN2,DBI,KLF2,MMP9,NOS3,PLAT,TIE1
	EGR2		transcription regulator		-0.83	0.000637	BGLAP,BNIP3L,DHCR7,EPHA4,FLOT2,GATA3,IGF2,MBP,MPZ,PMP22,PRDM1,PRX,RORA,SCD,SLC12A2,TAOK1,TGFB3	368 (18)
	staurosporine		chemical - kinase inhibitor		-0.828	0.00231	BGLAP,CCR3,CYP1A1,ERBB3,IGF2,ITGB3,MMP13,MMP9,NR4A1,PLAT,PRDM1,PTH1R,S1PR1	377 (21)
	GATA3	0.558	transcription regulator		-0.82	2.57e-05	BCL11A,BCL11B,CCR3,CDH2,CEBPA,CHST2,CRABP2,CST6,CXCR6,EBF1,ELOVL3,ERG,GATA3,GRHL3,GZMA,IRF6,KRT17,MAF,NFIL3,OVOL1,PPL,SGPP1,Sprr2b,Sprr2h,TEK,VIM	298 (11)
	CIP2A		other		-0.817	0.000556	CDKN2B,COL15A1,DSC2,GADD45A,MFAP5,NPTX1,PDGFRB,PDLIM7,RHOC,SLC22A4
	miR-1-3p (and other miRNAs w/seed GGAAUGU)		mature microRNA		-0.817	0.0192	AXL,BDNF,CDCP1,CPOX,FBLN2,FSTL1,PDCD4,PDLIM7,PLEKHG2,SERPINB5,SH2D4A,THBS1,TLCD3A,TNS4,WDFY1
	NFKBIA		transcription regulator		-0.816	0.000417	ADAMTS5,AEBP1,AXL,BCL11A,CAMP,CCL21,CCR3,CEBPD,COL2A1,COL3A1,COL5A2,CSF1,FCGRT,GADD45A,GPX3,HAS1,IFI16,IGF2,IGFBP6,KLF5,LCN2,MGP,MMP13,MMP14,MMP9,NID1,NOS3,NR4A1,PLAT,SLC12A2,SOD3,TGFB1I1,TIMP2,TMEM176B,TNFAIP8	385 (20)
	fluocinolone acetonide		chemical drug		-0.816	0.00532	ANGPTL7,AQP1,CXADR,JUND,KDM5B,LSP1,RUNX2	280 (7)
	STAT5A		transcription regulator		-0.805	0.00373	ALDH3A1,ANKRD22,BCL11A,CEBPA,CYP2J2,EGLN3,GADD45A,GDPD3,GRHL3,GZMA,KRT80,LCN2,MAF,PRDM1,PROM2,PTK6,RAB27B,RNF39,RORA,RUNX2,S1PR5,SH3GL2,SOCS2	149 (7)
	miR-200b-3p (and other miRNAs w/seed AAUACUG)		mature microRNA		-0.794	0.00255	ACE2,EPCAM,ERRFI1,GRB7,JAG1,PERP,VIM
	caffeine		chemical drug		-0.792	0.00861	BDNF,CCN2,CEBPA,CTSK,NR4A1,THBS1,TP73,VIM	336 (19)
	LOX		enzyme		-0.791	3.58e-05	COL3A1,ELN,PDGFRA,PDGFRB,SNAI2,TEK,TP63	167 (7)
	CLDN7		other		-0.786	0.00249	ABLIM1,ALDH3A1,CCN2,IGFBP7,ITPR3,MMP2,MMP9,SCEL,SCGB1A1,SERPINB7,SLCO2A1,TIMP2,TINAGL1
	10E,12Z-octadecadienoic acid		chemical - endogenous mammalian		-0.786	0.00938	2010016I18Rik,CEBPA,EBF1,ENDOU,HMMR,MRGPRX2,NPTX1,NR4A1,PLK2,PNPLA2,SCD,SOX7,TUBA8,Zfp185
[truncated: 1,122 more rows]

## Sheet: e -z-score cytokine USRs
USR list in d filtered for Cytokines with negative z-scores for Gzma-/- +CHIKV vs 6J+CHIKV	Upstream Regulator	Expr Log Ratio	Molecule Type	Predicted Activation State	Activation z-score	p-value of overlap	minus log p	n	Target Molecules in Dataset
[truncated: 27 more rows]

[truncated: 4 more sheets: f All genes 6J+CHIKVvs6Jmock, g DEGs 6J+CHIKVvs6Jmock, h 2201 DEGs IPA USR , i +z score cytokine USRs]
