# Supplementary material for: Widespread discrepancy in Nnt genotypes and genetic backgrounds complicates granzyme A and other knockout mouse studies
Source: eLife. 2022 Feb 4;11:e70207. doi: 10.7554/eLife.70207 (PMC8816380; doi:10.7554/eLife.70207)
Supplement: Supplementary file 4. — Datasets for RNA-Seq and Ingenuity Pathway Analysis (IPA) of mice feet day 6 post infection; 6NNnt∆8-12+ CHIKV vs. 6N + CHIKV. [file elife-70207-supp4.xlsx]

## Sheet: a All genes6N_Nnt+CHIKvs6N+CHIK
RNA-Seq for 6NNnt∆8-12+CHIKV vs 6N+CHIKV feet day 6 post infection, all genes	ensembl_ID	GeneID	logFC	logCPM	F	PValue	FDR	6N	6N	6N	6N	6N	6N	6NNNTKO	6NNNTKO	6NNNTKO	6NNNTKO	6NNNTKO
	ENSMUSG00000000001.5	Gnai3	0.106079	7.359	1.47434	0.230718	0.628623	1009	1003	348	699	781	1011	762	1123	931	847	669
	ENSMUSG00000000028.16	Cdc45	-0.228789	3.0237	1.77626	0.189024	0.617516	55	64	23	41	54	63	34	58	41	46	35
	ENSMUSG00000000031.17	H19	0.522917	5.11192	4.55329	0.0456916	0.38213	339	243	101	237	170	231	278	278	262	209	479
	ENSMUSG00000000037.18	Scml2	0.0250103	2.36876	0.0137683	0.971395	1	37	27	7	20	17	38	21	37	18	30	16
	ENSMUSG00000000049.12	Apoh	-0.261094	-1.3215	0.0686487	0.807091	1	1	1	0	0	1	0	0	1	0	1	0
	ENSMUSG00000000056.8	Narf	0.265572	5.07038	4.43161	0.0406426	0.366219	269	235	62	140	174	252	223	270	246	174	182
	ENSMUSG00000000058.7	Cav2	-0.0585863	5.44497	0.0536617	0.819229	1	283	192	43	166	177	398	158	378	137	255	69
	ENSMUSG00000000078.8	Klf6	0.25506	8.54478	4.77066	0.034004	0.342188	2707	3272	1048	2465	2354	2928	2349	3153	3831	2500	2623
	ENSMUSG00000000085.17	Scmh1	-0.0191815	4.62205	0.0220456	0.8826	1	200	141	46	113	115	214	134	197	115	153	74
	ENSMUSG00000000088.8	Cox5a	0.108136	5.42749	0.937899	0.337768	0.702335	318	317.99	67	221	251.98	325	230.92	325.96	255.96	250.99	232.82
	ENSMUSG00000000093.7	Tbx2	-0.27955	2.91778	2.26655	0.138875	0.565362	92	72	20	50	51	64	42	74	35	44	42
	ENSMUSG00000000094.13	Tbx4	-0.298485	2.64335	2.33869	0.132887	0.554151	83	58	19	39	35	55	44	46	40	43	20
	ENSMUSG00000000120.7	Ngfr	-0.538052	3.12484	7.14834	0.0102812	0.211023	54	64	37	61	55	56	45	50	22	50	28
	ENSMUSG00000000125.6	Wnt3	-0.249677	3.59387	1.65344	0.204781	0.617516	49	61	36	37	36	35	29	47	37	42	30
	ENSMUSG00000000126.12	Wnt9a	0.0529337	2.5097	0.0632588	0.802512	1	48	52	15	36	25	72	48	39	40	35	43
	ENSMUSG00000000127.16	Fer	0.307496	5.01867	6.37662	0.0149897	0.245741	222	194	52	142	150	216	170	203	240	165	186
	ENSMUSG00000000131.16	Xpo6	-0.144022	7.17317	2.4867	0.121509	0.535718	1066	1161	494	876	915	1185	806	1227	803	927	645
	ENSMUSG00000000134.18	Tfe3	0.0360267	6.20707	0.121225	0.729261	0.981937	578	636	199	419	444	594	580	640	488	402	332
	ENSMUSG00000000142.16	Axin2	0.137635	5.09542	1.39513	0.243474	0.628623	224	208	101	167	148	208	205	239	173	171	188
	ENSMUSG00000000148.18	Brat1	-0.297709	4.49614	4.82846	0.0329493	0.33905	157	162	93	172	157	183	138	153	98	144	111
	ENSMUSG00000000149.11	Gna12	-0.404529	6.06446	14.3825	0.000424567	0.0500629	575.22	557.46	238	541.5	504.89	631.24	357.8	601.68	271.94	459.49	282
	ENSMUSG00000000154.17	Slc22a18	-0.381979	1.31817	1.4699	0.23141	0.628623	18	11	7	10	15	19	15	20	4	6	7
	ENSMUSG00000000157.17	Itgb2l	-0.96331	0.59262	3.13758	0.0885415	0.479842	20	14	4	8	24	20	3	9	3	22	1
	ENSMUSG00000000159.17	Igsf5	0.45633	-1.21662	0.181802	0.671773	0.947194	1.37	0	0	0	1	0	0	2	0	1	0
	ENSMUSG00000000167.15	Pih1d2	-0.298527	0.308701	0.301087	0.586163	0.897265	10	6	1	4	9	3	5	5	7	2	3
	ENSMUSG00000000168.11	Dlat	0.519689	5.58489	15.3116	0.00033912	0.0447007	366	350	109	247	231	346	399	343	484	254	401
	ENSMUSG00000000171.6	Sdhd	0.188309	5.20876	2.49373	0.120997	0.535231	328	265	64	174	236	334	259	327	288	195	207
	ENSMUSG00000000182.10	Fgf23	-0.135483	-0.450104	0.0623323	0.803933	1	8	4	3	5	2	2	3	9	3	2	2
	ENSMUSG00000000183.7	Fgf6	-0.626567	0.682056	2.18982	0.145586	0.578657	18	9	0	4	13	17	9	8	4	2	8
	ENSMUSG00000000184.13	Ccnd2	0.217219	8.72501	6.01723	0.0179258	0.265856	3254	3445.91	1160	2641.9	2752	3075	3066.9	3749	3341.82	3088	2496
	ENSMUSG00000000194.14	Gpr107	0.1863	6.53523	3.72003	0.059805	0.424734	691	676	247	513.89	468.83	665	594	700	674	500.78	576.84
	ENSMUSG00000000197.9	Nalcn	-0.261671	0.721526	0.585977	0.453702	0.803312	13	9	7	12	7	12	12	15	5	6	5
	ENSMUSG00000000202.10	Btbd17	0.574883	-0.753423	0.790716	0.378405	0.746017	1	6	0	1	1	2	1	6	3	3	1
	ENSMUSG00000000204.17	Slfn4	-0.0914	9.25556	0.148126	0.704533	0.965467	5457.92	4859.9	2101.98	5779.77	4747.93	5111.88	3636.89	6226.92	4712.9	4939.87	3068.72
	ENSMUSG00000000214.12	Th	0	-1.62408	0	1	1	0	0	0	0	0	0	0	0	0	0	0
	ENSMUSG00000000216.9	Scnn1g	0.0787634	1.4525	0.0371608	0.847967	1	3	3	2	6	4	7	7	4	5	3	3
	ENSMUSG00000000223.14	Drp2	0.287885	5.14606	7.25255	0.00977762	0.206055	357	267	101	219	208	338	269	366	294	279	273
	ENSMUSG00000000244.18	Tspan32	-0.146099	2.54399	0.519081	0.474796	0.815599	48.84	42	25.44	30	47	42	41	56	30	36	21
	ENSMUSG00000000247.12	Lhx2	-0.190456	3.04392	1.02701	0.316042	0.679413	59	53	35	56	50	42	49	59	41	45	31
	ENSMUSG00000000248.17	Clec2g	0.484543	3.39574	2.03344	0.164079	0.614237	18	13	0	4	7	23	12	28	13	17	5
	ENSMUSG00000000253.14	Gmpr	0.847414	2.58064	11.0323	0.00203018	0.100409	44	27	10	22	11	54	42	63	47	45.68	46
	ENSMUSG00000000263.16	Glra1	0.219552	-1.39789	0.0550297	0.815669	1	3	0	0	0	1	0	0	2	1	1	0
	ENSMUSG00000000266.12	Mid2	0.0372979	5.41055	0.0769525	0.782685	1	227	191	44	136	124	244	109	273	145	183	104
	ENSMUSG00000000275.17	Trim25	0.00299089	7.49238	0.00084957	0.97687	1	1484	1391	503	1298	1117	1342	1229	1673	1196	1095	834
	ENSMUSG00000000276.12	Dgke	0.234854	4.32658	2.5602	0.116275	0.532525	123	111	24	105	97	140	111	143	116	118	85
	ENSMUSG00000000278.11	Scpep1	-0.365168	6.41109	14.2164	0.000454234	0.0507205	643	652	279	552	589	678	413	649	421	445	325
	ENSMUSG00000000282.13	Mnt	-0.0544655	5.79097	0.247703	0.621014	0.921448	483	473	211	386	377	428	446	426	350	358	329
	ENSMUSG00000000290.14	Itgb2	-0.409474	7.76157	8.03025	0.00835099	0.192328	1935	2042	848	1698	1822	2017	1283	1961	1280	1224	952
	ENSMUSG00000000295.14	Hddc2	0.0287513	2.52884	0.0188368	0.891421	1	22	39	12	31	33	36	29	42	19	38	21
	ENSMUSG00000000296.9	Tpd52l1	-0.0338218	1.7125	0.0112157	0.916131	1	24	16	8	3	12	34	18	32	13	7	9
	ENSMUSG00000000301.17	Pemt	-0.666981	0.254043	2.20652	0.144095	0.57526	11	4	2	12	5	7	3	11	3	4	1
	ENSMUSG00000000303.13	Cdh1	0.266564	7.25332	6.72563	0.0126251	0.229423	609	594	162	435	437	621	558	859	534	539	358
	ENSMUSG00000000305.13	Cdh4	0.582174	1.90699	4.09469	0.0487156	0.394931	23	21	6	9	18	21	26	28	22	22	22
	ENSMUSG00000000308.15	Ckmt1	0.191039	5.82038	2.159	0.148879	0.58512	278	301	171	195	240	243	307	319	340	232	215
	ENSMUSG00000000317.12	Bcl6b	-0.294899	2.96907	2.76964	0.102711	0.51507	77	64	22	55	45	72	33	54	48	57	33
	ENSMUSG00000000318.17	Clec10a	0.0444485	4.20813	0.0886792	0.767173	1	156	148	60.94	141.96	136.84	139.8	149.86	165.6	170.96	73	117
	ENSMUSG00000000320.11	Alox12	-0.356562	4.0917	4.5209	0.0387557	0.360373	91	59	32	41	72	72	37	66	44	67	28
	ENSMUSG00000000326.14	Comt	-0.00127181	5.26137	0.00010981	0.991683	1	297	264	73	185	181.75	307	231	296	208.84	224.71	113
	ENSMUSG00000000339.15	Rtca	0.214573	4.07652	2.46015	0.123465	0.538725	130	144	48	113	105	115	133	134	151	91	117
	ENSMUSG00000000340.11	Dbt	0.171404	4.23029	1.61801	0.209617	0.618317	118	122	38	76	96	156	94	162	135	97	76
	ENSMUSG00000000346.10	Dazap2	-0.0461365	7.26307	0.0636292	0.803285	1	1448.33	1257.61	199	827.68	792.66	1525.72	935.53	1438.16	785.77	939.32	554.89
	ENSMUSG00000000355.14	Mcts1	-0.0021093	3.62333	0.000179481	0.989368	1	73	61	16	48	57	109	51	75	68	51	48
	ENSMUSG00000000359.4	Rem1	-0.101471	1.66326	0.159969	0.720844	0.975999	22	17	11	25	17	23	21	24	16	16	14
	ENSMUSG00000000365.10	Rnf17	-0.342783	-0.459933	0.305742	0.585063	0.89682	2	2	4	3	2	2	1	1	2	2	4
	ENSMUSG00000000374.9	Trappc10	-0.0599213	6.75828	0.457223	0.502233	0.838697	814	793	273	617	657	761	566	898	552	691	449
	ENSMUSG00000000378.16	Ccm2	-0.0700427	4.61465	0.36423	0.549063	0.873423	190	218	76	181	170	191	157	200	167	130	158
	ENSMUSG00000000381.11	Wap	0.203109	-1.4511	0.0375016	0.854127	1	0	0	0	0	1	1	0	1	0	0	1
	ENSMUSG00000000384.16	Tbrg4	-0.24296	4.98822	3.73085	0.0594484	0.424025	249.09	255	132	194.07	215	215	203	235	135	214	134
	ENSMUSG00000000385.9	Tmprss2	0.28013	2.04294	1.3118	0.257859	0.628623	27	18	9	18	14	24	17	31	32	18	14
	ENSMUSG00000000386.17	Mx1	-0.0255231	7.32736	0.0185228	0.893058	1	1326.85	1361.54	556.81	1335.15	1269.12	1303.37	1036.99	1634.19	1310	1311	745.1
	ENSMUSG00000000392.18	Fap	-0.336494	3.99109	4.76461	0.0340723	0.342188	163	123	29	94	89	159	72	126	66	101	58
	ENSMUSG00000000394.16	Gcg	0.177013	-1.5068	0.0229682	0.896562	1	0	0	0	0	0	1	0	0	0	1	0
	ENSMUSG00000000399.11	Ndufa9	0.425742	5.39875	12.5983	0.000887828	0.0689974	323	324	113	207	225	267	364	324	388	238	288
	ENSMUSG00000000402.3	Egfl6	-0.418486	0.590553	1.26906	0.265652	0.628623	19	13	3	3	7	11	6	11	6	5	6
	ENSMUSG00000000409.15	Lck	-0.550218	3.96891	7.13418	0.0123768	0.226669	124	160	53	103	145	155	80	106	94	76	65
	ENSMUSG00000000411.8	Tssk3	-0.316378	-0.748478	0.184764	0.669272	0.946974	1	4	2	2	0	3	4	1	1	2	0
	ENSMUSG00000000416.17	Cttnbp2	0.111894	4.60111	0.615583	0.436624	0.791489	87	76.81	25	48.78	65.74	75.06	67	92.99	56.58	84.31	40
	ENSMUSG00000000420.16	Galnt1	0.27278	6.62507	7.12042	0.0104207	0.211756	707.55	713	206	454	525.14	831.3	581	793	782	572.18	604.28
	ENSMUSG00000000435.2	Myf5	-0.190015	-0.420898	0.126624	0.723548	0.978173	6	4	4	2	3	4	3	2	3	8	1
	ENSMUSG00000000439.10	Mkrn2	0.239586	5.49561	4.6115	0.0369378	0.352161	372.15	302.23	93.76	206.93	207.64	376.43	262.95	408.1	300.32	301.64	225.79
	ENSMUSG00000000440.13	Pparg	-0.233442	4.17432	3.07342	0.0860915	0.473735	141	156	48	147	123	138	101	152	115	86	83
	ENSMUSG00000000441.18	Raf1	-0.154766	6.65926	2.81265	0.100152	0.508086	737.46	772.74	250.01	604.92	592.75	882.09	527.55	792.29	534.28	600.12	408.3
	ENSMUSG00000000486.14	Septin1	-0.314757	3.72174	2.41958	0.129932	0.54891	91	163	85	102	122	101	85	88	107	68	110
	ENSMUSG00000000489.8	Pdgfb	-0.31932	4.7166	6.68385	0.0128859	0.230759	210	178	101	217	161	193	134	209	135	161	99
	ENSMUSG00000000530.17	Acvrl1	-0.332218	5.54618	7.46748	0.00881995	0.195625	441	457	195	371	335	395	339	366	267	279	228
	ENSMUSG00000000531.6	Tamalin	-0.184301	2.71521	0.718937	0.400783	0.763237	55	49	27	64	55	38	49	39	35	56	36
	ENSMUSG00000000532.12	Acvr1b	0.492776	6.47398	18.3913	8.85822e-05	0.0240705	528	530	232	440	414	493	646	626	739	442	623
	ENSMUSG00000000538.19	Tom1l2	0.123781	6.69295	1.73364	0.19432	0.617516	656.78	598.1	232.77	478.61	466.77	623	573.12	675.64	511.24	537	464.77
	ENSMUSG00000000544.15	Gpa33	0.557979	-1.15723	0.321205	0.573577	0.88921	0	1	0	1	0	2	0	0	3	1	1
	ENSMUSG00000000552.11	Zfp385a	0.0991702	5.41661	0.588826	0.446705	0.800897	315	231	79	173	177	277	295	306	159	219	128
	ENSMUSG00000000555.9	Itga5	-0.220774	7.36726	2.91232	0.0966546	0.499515	1390	1440	621	1263	1244	1403	1137	1758	818	1148	655
	ENSMUSG00000000560.10	Gabra2	0.15072	-1.53596	0.0187898	0.896562	1	0	0	0	0	0	1	0	1	0	0	0
	ENSMUSG00000000561.15	Wdr77	0.177223	5.51463	2.55072	0.116936	0.532525	285.13	262.79	131.86	240.76	245.96	313.04	265.96	336.94	257.12	292.8	254.51
	ENSMUSG00000000562.6	Adora3	0.0718009	3.09755	0.143853	0.706186	0.966672	54	79	9.23	53.3	42	56	49.73	78.76	49	45.9	31
	ENSMUSG00000000563.18	Atp5pb	0.0452175	6.44984	0.250922	0.618761	0.919994	574.48	574.29	229.62	490.76	483.44	655.15	481.77	719.48	526.07	516.56	374.09
	ENSMUSG00000000567.6	Sox9	-0.200151	4.69083	2.55891	0.116365	0.532525	151	172	71	166	125	199	142	180	128	127	77
	ENSMUSG00000000568.16	Hnrnpd	0.465924	6.43114	14.4879	0.000447736	0.0507205	612.92	667.92	137.9	413	456.89	664.87	587.96	669.92	839.94	480.93	619.98
	ENSMUSG00000000579.15	Dynlt1c	-0.108568	3.25422	0.348934	0.557542	0.879359	76.13	78.4	36.6	57.81	51.53	79.21	66.94	97.35	66.6	40.25	31.8
	ENSMUSG00000000581.9	C1d	0.0720514	4.3452	0.295413	0.589337	0.899153	135	149	36	105	127	169	100	166	118	147	90
	ENSMUSG00000000594.8	Gm2a	-0.325221	6.56613	8.50342	0.00541442	0.156288	835	834	226	588	645	922	495	841	458	568	321
	ENSMUSG00000000600.16	Krit1	0.191366	6.03121	2.4288	0.125937	0.542647	498	399	97	306	330	601	325	584	465	388	285
	ENSMUSG00000000605.10	Clcn4	0.123424	6.08704	1.44019	0.236113	0.628623	467.02	470.67	177.83	334.62	314.96	466.61	388.79	453.19	454.95	321.55	379.7
	ENSMUSG00000000617.15	Grm6	-0.981259	-1.4237	0.747929	0.398671	0.761599	0	2	1	0	0	0	0	0	0	1	0
	ENSMUSG00000000627.16	Sema4f	-0.298326	1.92036	1.1931	0.280334	0.639238	28	40	21	33	27	24	34	21	22	24	19
	ENSMUSG00000000628.11	Hk2	0.400454	7.10574	16.3917	0.000190758	0.0343707	1098	986	384	667	713	955	992	1145	1058	1053	958
	ENSMUSG00000000631.21	Myo18a	0.045778	8.04151	0.160225	0.69076	0.95748	1997	1604	878	1446	1535	1564	1639	1772	1531	1407	1548
	ENSMUSG00000000632.14	Sez6	1.41516	-1.45134	1.78016	0.208944	0.617516	0	0	0	0	0	0	0	0	0	1	0
	ENSMUSG00000000673.10	Haao	-0.525221	2.00958	4.27233	0.0442613	0.377561	28	33	18	22	38	25	14	27	13	28	16
	ENSMUSG00000000682.8	Cd52	-0.72165	6.051	5.32717	0.0322775	0.336631	588	545	117	473	510	802	298	682	155	344	87
	ENSMUSG00000000686.12	Abhd15	-0.222568	2.6109	1.22338	0.274318	0.63251	51.84	43.84	20	35.6	52.68	59.98	40.46	44.92	37.55	20.24	42.82
	ENSMUSG00000000690.6	Hoxb6	-0.190496	1.52681	0.374959	0.54326	0.870187	10	16	14	19	19	13	18	12	12	14	13
	ENSMUSG00000000693.11	Loxl3	-0.267195	5.8863	3.27422	0.0802858	0.459824	512.12	584.29	291.64	418.68	454.9	436.8	404.31	404.13	334.17	388.86	383.58
	ENSMUSG00000000706.17	Btn1a1	0.15821	-1.59324	0.0194818	0.896562	1	0	0	0	0	1	0	1	0	0	0	0
	ENSMUSG00000000708.15	Kat2b	-0.0606435	6.48099	0.352901	0.55532	0.877331	746.88	595.92	214.95	477.95	524.97	772.97	455.98	757	437.87	621.98	374.94
	ENSMUSG00000000711.4	Rab5b	0.23338	6.58277	5.73286	0.0206845	0.28514	732.37	622.59	176.63	462.06	499.23	760.18	611.01	779.51	657.51	531	499.34
	ENSMUSG00000000724.11	Cryba1	0.417053	0.115271	0.753188	0.389871	0.755995	5	3	2	0	10	3	5	6	8	4	3
	ENSMUSG00000000730.14	Dnmt3l	0.164668	-0.174466	0.109225	0.742495	0.99089	4	9	3	3	3	1	3	5	4	8	2
	ENSMUSG00000000731.16	Aire	-0.471245	-1.45107	0.174108	0.678383	0.950192	1	0	0	0	0	1	0	0	1	0	0
	ENSMUSG00000000732.10	Icosl	-0.237586	4.63809	4.25117	0.0447676	0.379074	220	186	70	148	151	229	140	213	128	141	91
	ENSMUSG00000000738.19	Spg7	-0.037241	5.15266	0.0817774	0.776158	1	224	248	155	204	248	249	238	245	245	190	200
	ENSMUSG00000000739.15	Sult5a1	-0.260331	2.42852	1.7538	0.191794	0.617516	47	30	17	29	34	38	27	39	21	27	23
	ENSMUSG00000000740.13	Rpl13	-0.176192	8.44214	1.96584	0.168825	0.617516	2156.16	1787.19	896.79	2109.4	2162.75	2223.97	1701.73	2559.13	1132.27	2253.46	1063.64
	ENSMUSG00000000743.10	Chmp1a	-0.173481	6.53319	2.59263	0.114048	0.532525	617.6	665.86	343.38	587.8	586.71	589.96	530.62	682.84	424.47	549.7	427
	ENSMUSG00000000751.14	Rpa1	0.0354781	5.66527	0.114749	0.736307	0.986533	418	424	149	290	356	413	368	410	399	285	274
	ENSMUSG00000000753.16	Serpinf1	-0.615448	6.93671	16.3281	0.000406741	0.0494535	1568	1149	362	844	877	1209	740	951	340	823	388
	ENSMUSG00000000759.15	Tubgcp3	0.00502123	5.75527	0.00307082	0.956042	1	439	403	155	303	321	386	325	451	312	338	262
	ENSMUSG00000000766.19	Oprm1	0.264321	-0.170258	0.24184	0.625166	0.924455	6	4	0	4	3	2	4	7	2	2	4
	ENSMUSG00000000776.14	Polr3d	0.234691	4.11506	2.20437	0.144285	0.575663	134	139	63	90	99	102	129	117	131	94	140
	ENSMUSG00000000782.17	Tcf7	-0.212071	3.6717	1.65392	0.204715	0.617516	110	115	28	49	57	125	54	102	68	79	39
	ENSMUSG00000000787.13	Ddx3x	0.608512	8.40814	31.47	1.03835e-06	0.0032724	2177	2281	490	1482	1438	2373	2100	2828	2975	2124.26	2245
	ENSMUSG00000000791.10	Il12rb1	-0.757969	4.29193	7.46542	0.0129421	0.23127	167	229	96	221	184	180	115	178	121	77	67
	ENSMUSG00000000792.3	Slc5a5	0.936917	-0.873994	1.09588	0.300517	0.661252	0	1	0	2	0	1	2	2	1	2	0
	ENSMUSG00000000794.10	Kcnn3	0.539861	3.67826	6.38773	0.0171179	0.26017	146	56	14	62	59	88	93	117	88	110	83
	ENSMUSG00000000804.15	Usp32	0.108049	6.17364	0.957285	0.332873	0.69739	499	436	126	351	350	526	304	477	522	360	327
	ENSMUSG00000000805.19	Car4	-0.41543	0.861736	0.418794	0.524462	0.856407	14	8	11	8	6	11	3	12	13	7	3
	ENSMUSG00000000811.15	Txnrd3	0.356611	3.85196	5.83629	0.0196318	0.278941	102	74	23	68	83	75	89	103	81	91	81
	ENSMUSG00000000817.11	Fasl	-0.351403	1.94276	1.67126	0.202399	0.617516	18	35	12	28	32	26	20	31	15	19	16
	ENSMUSG00000000823.17	Zfp512b	0.0808064	5.902	0.70936	0.403915	0.76596	452	400	162	280	318	427	371	481	318	340	290
	ENSMUSG00000000826.17	Dnajc5	0.15577	7.21783	2.93286	0.0933736	0.491646	1213	1180	424	850	901	1224	1003	1255	1125	949	961
	ENSMUSG00000000827.19	Tpd52l2	0.224384	5.73525	3.9831	0.0517626	0.406741	311	328	163	286	307	355	303	382	374	296	360
	ENSMUSG00000000838.18	Fmr1	0.443549	6.07751	11.7802	0.00140963	0.0842551	447.32	376.55	77	345.48	313	536.23	358.31	535	545.32	453	362.29
	ENSMUSG00000000861.16	Bcl11a	-0.0938784	6.00255	0.642404	0.426869	0.783806	363	361	101	249	257	440	262	333	269	340	151
	ENSMUSG00000000869.13	Il4	0.863138	-1.32153	0.570769	0.458672	0.803312	0	1	0	0	0	0	0	1	0	0	1
	ENSMUSG00000000876.12	Pxmp4	0.0199688	4.90936	0.0231603	0.879691	1	266	244	56	154	169	252	219	272	127	188	135
	ENSMUSG00000000881.13	Dlg3	0.248032	4.16472	3.03598	0.0879672	0.478587	128	93	25	47	79	90	92	103	86	83	78
	ENSMUSG00000000884.18	Gnb1l	0.300304	2.15174	1.972	0.166799	0.617516	25	26	11	16	22	32	26	32	20	27	29
	ENSMUSG00000000901.18	Mmp11	-0.278341	1.95512	1.38544	0.245093	0.628623	34	34	16	18	18	29	22	29	19	22	12
	ENSMUSG00000000902.14	Smarcb1	-0.0742136	5.90337	0.564216	0.456305	0.803312	437	403	163	359	385	402	359	434	328	378	225
	ENSMUSG00000000903.4	Vpreb3	-1.29429	-0.589233	3.97261	0.0520595	0.40776	2	6	2	4	8	2	1	1	3	3	0
	ENSMUSG00000000915.16	Hip1r	0.0437942	6.24998	0.160483	0.690524	0.957291	367.55	410.41	187.43	286.29	308.68	298.35	330.69	425.61	331.83	288.25	271.51
	ENSMUSG00000000916.16	Nsun5	-0.0555002	3.77741	0.151997	0.698393	0.961665	110.51	87.35	40.27	96.31	87.16	94.8	94.21	108.67	76.91	72.22	66.23
	ENSMUSG00000000934.10	Top1mt	0.222765	3.0872	1.65608	0.204426	0.617516	53	58	27	45	53	45	60	67	56	50	45
	ENSMUSG00000000938.12	Hoxa10	-0.0978747	3.13745	0.266871	0.607857	0.912627	66	52	20	30	35	96	41	64	37	45	40
	ENSMUSG00000000942.11	Hoxa4	-0.065891	0.675977	0.0231649	0.879679	1	9.87	7	3	5	2	7.56	7.75	10.73	2	2	5
	ENSMUSG00000000948.17	Gm38393	0.503453	0.367125	0.953014	0.333943	0.698005	2	2	0	5.27	4	10	3	7.43	6	8	3
	ENSMUSG00000000957.12	Mmp14	-0.0267529	7.41798	0.0681128	0.795243	1	1436	1660	552	1122	1137	1261	1254	1371	1129	1160	945
	ENSMUSG00000000958.11	Slc7a7	-0.264634	3.79518	2.57515	0.115242	0.532525	122.1	101.35	51.92	98.87	108.63	135.09	97.48	123.86	94.78	63.12	57.65
	ENSMUSG00000000959.8	Oxa1l	-0.235938	5.01929	4.55852	0.0379894	0.356846	257.9	231.65	84.08	173.13	199.37	261.91	183.52	235.14	126.22	174.88	132.35
	ENSMUSG00000000976.14	Heatr6	-0.117778	5.12186	1.27521	0.264513	0.628623	257	232	88	177	183	205	161	248	171	161	143
	ENSMUSG00000000982.6	Ccl3	-0.416302	2.94858	1.55046	0.22629	0.628623	64	74	19	41	28	36	33	65	24	43	4
	ENSMUSG00000000983.14	Wfdc18	-0.350163	2.49907	0.503043	0.518253	0.850999	3	3	4	5	5	1	3	7	1	1	2
	ENSMUSG00000001014.7	Icam4	-0.44767	-0.856454	0.274306	0.602915	0.908668	2.88	0.91	1	0.9	5.38	0	0.01	0.81	1.04	2.79	2
	ENSMUSG00000001016.13	Ilf2	0.220815	5.45396	4.23572	0.0451415	0.380205	343.77	295.07	91.19	234.41	228.95	300.22	256.49	324.47	321.13	235.53	270.44
	ENSMUSG00000001017.16	Chtop	0.155336	6.69181	2.56555	0.115904	0.532525	729	732	331	561	576	736	601	798	740	625	656.99
	ENSMUSG00000001018.16	Snapin	0.073183	4.87608	0.148417	0.703291	0.964586	228.23	203.93	29.81	131.59	124.05	236.78	183.51	223.53	110.87	179.47	103.56
	ENSMUSG00000001020.9	S100a4	-0.204876	7.28199	2.05296	0.162591	0.610876	1567	1136	292	823	1035	1727	876	1482	687	1095	500
	ENSMUSG00000001021.14	S100a3	0.301618	2.63064	0.818167	0.371589	0.739445	21	15	10	7	5	9	16	23	12	6	13
	ENSMUSG00000001023.11	S100a5	1.73996	-0.803148	4.86046	0.0324016	0.337418	2	1	0	0	2	1	6	6	1	2	3
	ENSMUSG00000001025.9	S100a6	-0.560313	7.60499	5.46664	0.0302835	0.32892	1632	949	700	1485	1828	1821	985	1682	500	1400	497
	ENSMUSG00000001027.8	Scn4a	0.497849	5.64207	10.2751	0.00330853	0.126877	437	281	136	198	239	439	373	631	360	323	343
	ENSMUSG00000001029.16	Icam2	-0.449405	2.29779	4.15187	0.0472306	0.388733	44	40	11	30	41	44	28	36	20	33	11
	ENSMUSG00000001034.18	Mapk7	-0.411318	5.03574	12.7007	0.000850416	0.067676	269	344	132	274	223	290	185	297	143	202	160
	ENSMUSG00000001036.18	Epn2	0.255297	6.07842	6.28206	0.0157087	0.251267	473	409	121	296	319	472	411	497	417	377	318
	ENSMUSG00000001039.13	B9d1	-0.222361	1.717	0.785159	0.380072	0.74698	25	33	6	15	14	23	9	22	21	13	16
	ENSMUSG00000001052.16	Sec24b	-0.266019	6.35747	3.94667	0.0548047	0.416063	712	673	186	452	446	711	435	761	316	499	211
	ENSMUSG00000001053.16	N4bp3	-0.0652467	3.9196	0.120447	0.730331	0.982552	54	76	36	77	72	63	50	73	57	55	71
	ENSMUSG00000001054.10	Rmnd5b	-0.223326	4.48277	2.96521	0.0916385	0.486979	141	149	66	111	159	148	121	170	78	125	75
	ENSMUSG00000001056.4	Nhp2	0.490252	5.15077	11.1938	0.00189824	0.0977805	234	300	81	163	198	170	289	254	314	196	256
	ENSMUSG00000001062.19	Vps9d1	-0.196518	5.07466	2.87003	0.09685	0.499515	258	269	114	224	168	241	218	236	180	172	136
	ENSMUSG00000001065.16	Zfp276	-0.300712	5.17365	5.50833	0.0231839	0.298557	262.06	286.79	162.4	262.65	279.97	255.04	207.43	333.93	190.34	190.48	162.3
	ENSMUSG00000001076.8	C1ql4	-0.0287829	-1.15362	0.000787036	0.977738	1	0	2	2	1	1	1	1	1	3	1	0
	ENSMUSG00000001082.13	Mfsd10	-0.107863	4.44168	0.735818	0.39535	0.761599	181	176	55	124	157	173	151	198	102	133	88
	ENSMUSG00000001089.15	Luzp1	0.0708229	6.8925	0.524097	0.472682	0.813829	902	888	228	683	626	939	623	1053	625	849	522
	ENSMUSG00000001095.6	Slc13a2	-1.26013	-1.59362	1.52001	0.271182	0.628623	0	0	0	0	1	0	0	0	0	0	0
	ENSMUSG00000001098.16	Kctd10	-0.00593884	6.44433	0.00410366	0.949194	1	725.7	703.28	286.64	571.55	582.17	644.54	519.18	755.67	628.64	548.73	495.63
	ENSMUSG00000001100.11	Poldip2	-0.18964	5.1004	2.97419	0.0911634	0.485731	249	239	110	175	204	234	180	245	162	177	139
	ENSMUSG00000001103.8	Sebox	-0.0494396	-0.773048	0.00290124	0.957272	1	3	0	0	1	0	1	1	2	0	1	0
	ENSMUSG00000001105.16	Ift20	0.175455	4.51509	1.92156	0.172215	0.617516	132	159	56	107	111	128	123	148	159	99	120
	ENSMUSG00000001119.8	Col6a1	-0.378848	7.72267	11.5481	0.00138879	0.0840228	2084	1744	798	1287	1424	1993	1310	1591	852	1355	938
	ENSMUSG00000001120.16	Pcbp3	0.146809	2.33434	0.378912	0.541151	0.869367	48	30	12	18	18	31	42	31	24	24	21
	ENSMUSG00000001123.16	Lgals9	0.0651198	6.90735	0.246193	0.622921	0.922781	1101	999	281	809	850	966	798	1281	829	759	659
	ENSMUSG00000001127.13	Araf	-0.0226196	6.03538	0.060353	0.807007	1	486	448	163	305	346	504	383	478	344	354	275
	ENSMUSG00000001128.8	Cfp	-0.0730543	5.92737	0.362123	0.550216	0.874328	438	518	228	477	485	518	459	647	377	304	387
	ENSMUSG00000001131.12	Timp1	-0.250216	5.83684	1.67449	0.209535	0.618317	590	437	196	372	466	467	386	437	245	488	233
	ENSMUSG00000001134.10	Uxt	0.307691	2.34046	1.79397	0.186874	0.617516	33.54	35.85	2	16	23.83	32.83	34	43.7	24.49	28.93	14
	ENSMUSG00000001138.14	Cnnm3	0.0461092	5.08872	0.146796	0.703341	0.964586	246	185	112	167	157	234	189	250	190	167	169
	ENSMUSG00000001143.14	Lman2l	-0.391425	4.62855	9.74052	0.00307696	0.123174	180	166	89	159	191	168	106	149	122	125	116
	ENSMUSG00000001150.8	Mcm3ap	0.112996	5.97536	1.23445	0.272186	0.629577	470	491.94	191.78	348	404	428	443.94	477	487.86	361.91	337.9
	ENSMUSG00000001151.11	Pcnt	0.0410743	6.67061	0.163392	0.687883	0.955786	736	708	369	628.98	674	716	608	828	631.96	642.98	652
	ENSMUSG00000001155.14	Ftcd	-1.28741	-1.25043	1.17416	0.284067	0.643104	0	0	0	2	0	2	0	0	0	1	0
	ENSMUSG00000001156.10	Mxd1	-0.217911	7.66574	1.82084	0.189776	0.617516	1504	1489	780	1461	1353	1253	1004	1819	1099	1375	722
	ENSMUSG00000001157.14	Gmcl1	-0.00893169	3.99947	0.00486164	0.944708	1	112	96	30	69	88	129	74	123	79	91	62
	ENSMUSG00000001158.14	Snrnp27	0.57153	3.8359	9.79367	0.00340064	0.128983	99	141	34	70	58	101	104	124	170	70	132
	ENSMUSG00000001166.18	Oas1c	-0.051657	2.45444	0.0770097	0.782606	1	47	37	13	28	31	35	30	42	26	30	25
	ENSMUSG00000001168.17	Oas1h	-0.147863	0.204515	0.0996842	0.816762	1	8	1	4	7	2	5	5	7	2	6	1
	ENSMUSG00000001173.16	Ocrl	-0.0396577	5.55602	0.0994758	0.753854	0.999382	373	291	74	238	244	445	194	421	253	281	172
	ENSMUSG00000001175.17	Calm1	-0.257748	8.81425	7.18693	0.0100916	0.209112	3302	3158	1220	2960	2926	3885	2177	3504	2130	2570	1880
	ENSMUSG00000001211.16	Agpat3	0.063701	6.49441	0.459283	0.501276	0.83772	574	577	243	435	442	579	566	623	457	447	409
	ENSMUSG00000001225.13	Slc26a3	-1.88811	-1.59424	2.85844	0.119679	0.532525	1	0	0	0	0	1	0	0	0	0	0
	ENSMUSG00000001227.13	Sema6b	0.147043	4.43228	0.905706	0.346812	0.712682	159	196	102	161	179	137	198	215	196	157	134
	ENSMUSG00000001228.15	Uhrf1	0.0765313	5.88454	0.461211	0.500384	0.837282	523.61	455.12	157.89	374.94	363.91	415.51	360	435.78	383.92	411.16	382
	ENSMUSG00000001229.10	Dpp9	-0.0963298	5.67745	0.923384	0.341498	0.706704	421	459	140	336	305	394	348	434	275	316	229
	ENSMUSG00000001240.14	Ramp2	-0.258632	4.23486	3.11927	0.0838552	0.469402	185	136.31	71	130	122	160.79	135.4	179.95	84	88	87
	ENSMUSG00000001247.17	Lsr	-0.059416	4.53194	0.174087	0.678401	0.950192	86.98	129.51	43.32	95.58	84.11	80.94	90.7	131.75	78.36	66.89	60.36
	ENSMUSG00000001248.16	Gramd1a	-0.104589	5.45626	0.83351	0.365912	0.733583	376	375	171	314	300	324	314	409	292	240	229.33
	ENSMUSG00000001249.15	Hpn	0.122842	1.85416	0.2651	0.638834	0.934095	31	31	11	16	14	33	22	25	17	28	28
	ENSMUSG00000001270.10	Ckb	-0.652528	5.76497	24.7905	1.17297e-05	0.00812508	475.59	563.64	239	630.85	438.88	480.83	330.89	407.81	269	266.23	268.95
	ENSMUSG00000001280.14	Sp1	0.112241	7.4496	1.03267	0.314727	0.67768	1416	1197	281	829	840	1439	897	1353	1069	1029	811
	ENSMUSG00000001281.11	Itgb7	-0.515505	6.1947	4.96199	0.0378975	0.356427	509	749	444	682	740	587	469	558	523	378	387
	ENSMUSG00000001285.13	Myg1	-0.165469	3.94927	1.51494	0.2245	0.628623	104.38	132.71	41	102.44	98	112.35	98.3	105.35	90	80	65
	ENSMUSG00000001288.16	Rarg	-0.232127	6.85931	4.47445	0.0397251	0.362994	706	717	324	549	605	652	631	579	426	594	345
	ENSMUSG00000001289.13	Pfdn5	0.367627	5.35081	10.3239	0.00237137	0.108476	301.98	245.24	122	196.42	247.86	321.43	266.7	303.25	372	263.81	312
	ENSMUSG00000001300.17	Efnb2	0.06099	6.10303	0.345555	0.55945	0.880434	472	504	168	349	323	442	400	471	441	307	326
	ENSMUSG00000001305.6	Rrp15	0.468491	4.20136	5.33332	0.0291214	0.326498	131	159	81	97	103	104	137	139	191	116	198
	ENSMUSG00000001313.13	Rnd2	-0.194314	2.5031	0.740383	0.393899	0.760487	43.17	33.03	25.73	29.23	42.38	32.24	39.23	31.17	37.08	22.29	24
	ENSMUSG00000001323.18	Srr	-0.138523	3.75712	0.674591	0.415595	0.774943	106.96	68.45	18.74	50.2	58.32	106.15	52.08	114.31	46.54	52.25	41.41
	ENSMUSG00000001333.10	Sync	0.411803	3.59304	2.88553	0.10217	0.513544	92.61	92.9	63.22	58.45	88.26	71.52	100.09	98.15	80.69	79.36	163.34
	ENSMUSG00000001334.10	Fndc5	0.249245	1.6153	0.837828	0.364683	0.732308	22	11	12	11	12	26	15	21	18	17	22
	ENSMUSG00000001348.16	Acp5	-0.611729	4.80599	20.8345	3.59624e-05	0.015333	325	288	113	209	200	206.96	152	214	124	135	119
	ENSMUSG00000001349.6	Cnn1	-0.372375	1.4486	1.50783	0.225575	0.628623	16	15	6	24	13	12	7	21	13	8	8
	ENSMUSG00000001366.15	Fbxo9	-0.0423653	4.6535	0.114302	0.736802	0.98691	152	127	73	124	152	132	121	171	112	121	108
	ENSMUSG00000001376.18	Vps50	0.155417	5.2058	1.85052	0.180202	0.617516	219	213	74	192	203	281	170	287	257	196	177
	ENSMUSG00000001380.8	Hars	0.28931	5.54053	3.45202	0.0732588	0.449283	274	322.86	142	259	284	288.74	314	283.89	383	262.91	345
	ENSMUSG00000001383.10	Zmat2	0.22289	4.90202	3.10353	0.0846158	0.471149	218	238	85	153	183	220	193	220	223	162	243
	ENSMUSG00000001403.14	Ube2c	0.546284	4.49098	7.11372	0.0134683	0.236288	157.65	138.78	78.19	107.65	112.17	173.92	158.3	160.47	185.21	137.87	268.17
	ENSMUSG00000001415.11	Smg5	-0.135996	6.20727	1.94709	0.169449	0.617516	529	596	273	418	498	561	469	546	422	419	371
	ENSMUSG00000001416.14	Cct3	0.104648	6.7387	1.06564	0.307207	0.668797	773	806	325	610	736	740	737	864	724	726	562
	ENSMUSG00000001418.14	Glmp	-0.4481	5.85509	13.0797	0.000725655	0.0634749	486	455.96	158.67	342.86	377.91	410.06	321.98	469.47	224.95	262.71	126.29
	ENSMUSG00000001419.18	Mef2d	-0.0378492	7.18732	0.158983	0.691897	0.958099	1335.84	1256.33	512	866.45	922.76	1236.38	1047	1260	941.49	954.04	798
	ENSMUSG00000001420.14	Tmem79	0.282418	4.56768	2.35348	0.133943	0.555699	71	47.04	49.33	61.14	60.09	65.94	75.02	114.53	60.05	81.29	49.71
	ENSMUSG00000001424.15	Snd1	-0.00813073	7.21206	0.00622742	0.937436	1	1133	1212	511	987	986	1019	992	1111	1073	850	875
	ENSMUSG00000001435.16	Col18a1	-0.11258	6.82599	0.953243	0.333886	0.697951	892	893	459	845	790	760	856	852	642	676	660
	ENSMUSG00000001436.16	Slc19a1	-0.10767	3.6777	0.425068	0.51759	0.850597	101	91	47	82	67	94	66	116	54	104	46
	ENSMUSG00000001440.6	Kpnb1	0.161483	7.92866	3.25832	0.0774594	0.45222	1922	1870	648	1443	1452	1897	1524	2037	1698	1615	1586
	ENSMUSG00000001441.14	Npepps	0.11123	6.9321	1.36635	0.248324	0.628623	735	712	270	515	554	713	549	788	734	543	527
	ENSMUSG00000001444.3	Tbx21	-0.724484	2.71029	11.3271	0.00152794	0.0875525	57	61	38	52	55	63	43	52	26	29	22
	ENSMUSG00000001445.11	Mrpl10	-0.184405	4.70722	2.60452	0.113243	0.532525	188	235.95	61	162	162.76	220.97	157.95	194.92	128	154.96	110.96
	ENSMUSG00000001467.6	Cyp51	0.173026	5.35811	2.38132	0.12949	0.548043	222	233	70	207.05	172	223	159	260	260	188	180
	ENSMUSG00000001472.18	Tcf25	-0.0225701	7.49991	0.0693622	0.793417	1	1413	1389	519	1018	1117	1372	1199	1509	1002	1028	888
	ENSMUSG00000001473.8	Tubb6	-0.0323796	6.259	0.0944052	0.760005	1	770	832	218	486	503	673	591	728	505	589	382
	ENSMUSG00000001482.16	Def8	0.102155	5.71757	1.00943	0.320177	0.684405	364	368	117	298	291	351	324	390	286	286	291
	ENSMUSG00000001493.10	Meox1	0.2866	2.86659	1.96114	0.167948	0.617516	54	57	39	54	50	40	61	55	72	48	70
	ENSMUSG00000001494.7	Sost	-0.387716	0.852275	1.2061	0.277691	0.636096	11	14	5	9	13	8	7	8	3	10	10
	ENSMUSG00000001497.19	Pax9	-0.221688	0.977837	0.50521	0.480726	0.820606	11	12	3	10	10	24	10	8	13	7	10
	ENSMUSG00000001504.11	Irx2	0.131924	4.04768	0.845969	0.362384	0.729757	92	100	50	117	76	91	82	131	90	103	88
	ENSMUSG00000001506.11	Col1a1	-1.13111	12.2081	11.7474	0.00278837	0.117183	61814	53882	40073	35417	43160	36477	21865	16989	9573	27909	31230
	ENSMUSG00000001507.17	Itga3	0.0249969	5.86749	0.0456494	0.831737	1	356	398	158	274	232	306	282	424	297	288	211
	ENSMUSG00000001508.16	Sgca	0.031575	3.49106	0.024583	0.876246	1	111	69	29	39	50	109	80	114	54	56	41
	ENSMUSG00000001510.9	Dlx3	0.0290401	4.58419	0.0195779	0.889739	1	91	85	22	35	55	124	81	98	37	78	47
	ENSMUSG00000001517.15	Foxm1	-0.264376	4.96499	5.04879	0.0293707	0.326498	279	276	103	186	205	244	177	231	136	234	126
	ENSMUSG00000001518.13	Itfg2	-0.185725	4.00571	1.49492	0.22754	0.628623	130	165	63	88	95	130	96	95	98	100	98
	ENSMUSG00000001520.13	Nrip2	0.452257	1.67223	3.09366	0.0850963	0.471495	19	14	9	14	23	25	15	28	30	25	21
	ENSMUSG00000001521.13	Tulp3	0.0845088	4.12681	0.467975	0.497274	0.834172	138	127	54	90	124	130	115	162	127	104	85
	ENSMUSG00000001524.15	Gtf2h4	-0.232796	3.10673	1.41989	0.239395	0.628623	60	51	34	74	59	44	45	68	46	49	32
	ENSMUSG00000001525.11	Tubb5	-0.194302	8.78777	3.93162	0.053238	0.412317	3958	3973	1210	2650	2969	3685	2822	3555	2057	3078	1834
	ENSMUSG00000001542.8	Ell2	0.0406469	6.38802	0.134774	0.715177	0.972391	487	471	120	380	396	667	330	625	426	449	285
	ENSMUSG00000001552.15	Jup	0.246146	9.1559	4.80082	0.0334304	0.341046	2362	2134	666	1450	1564	2297	2318	3140	1621	2024	1236
	ENSMUSG00000001555.11	Fkbp10	-0.20581	5.3426	3.33061	0.0743499	0.449283	470.6	401.93	129.95	284.98	298.74	335.95	292.94	309.69	207.94	277.87	266.78
	ENSMUSG00000001558.6	Klhl10	-1.29024	-0.689547	2.81176	0.100205	0.508086	3	3	1	1	0	5	0	1	1	2	0
	ENSMUSG00000001569.11	Nom1	0.350459	5.51491	8.34618	0.00582537	0.161673	320	298	148	305	276	308	316	356	420	318	353
	ENSMUSG00000001576.16	Ergic1	-0.0688299	5.6854	0.265598	0.609175	0.9132	497	425	92	305	268	519	318	527	265	354	175
	ENSMUSG00000001583.14	Tnk1	0.544689	2.74263	7.60806	0.00824782	0.191769	27.94	34.95	6	27.57	22.16	30.52	39.32	54.85	34.63	23.14	28.37
	ENSMUSG00000001588.13	Acap1	-0.45639	3.83985	8.98239	0.00434104	0.143771	132	144	60	100	119	120	106	84	90	71	61
	ENSMUSG00000001604.15	Tcea3	0.198704	3.30644	0.924304	0.342333	0.70764	86	44	32	41	44	101	51	106	55	68	55
	ENSMUSG00000001627.13	Ifrd1	0.0883783	6.04795	0.755024	0.389299	0.755434	377.66	434.39	122.54	346.61	357.59	495.82	326.13	501.72	376.13	418.5	252.23
	ENSMUSG00000001630.14	Stk38l	0.00778034	4.98048	0.00478235	0.94516	1	234.74	200.88	72.81	189.3	181.74	258.37	157.65	259.56	162.36	229.3	141.42
	ENSMUSG00000001632.17	Brpf1	0.0209232	6.31766	0.0451849	0.832582	1	568	710.99	243	515	525.95	659.97	536	664	582	488	452
	ENSMUSG00000001642.19	Akr1b3	-0.075025	5.32242	0.414613	0.522762	0.854654	313.56	319.99	107.48	226.9	274.68	325.28	260.97	390.97	180.14	255.69	167.7
	ENSMUSG00000001655.7	Hoxc13	-0.0389694	2.63568	0.0290483	0.865398	1	26	25	11	20	26	25	24	42	14	18	13
	ENSMUSG00000001656.4	Hoxc11	-0.0183899	3.41224	0.0111639	0.916302	1	62	46	29	52	55	50	55	58	39	43	50
	ENSMUSG00000001657.8	Hoxc8	0.252198	2.58589	1.17024	0.284863	0.644016	32	29	6	17	17	33	32	20	30	19	26
	ENSMUSG00000001661.6	Hoxc6	-0.234956	2.45183	0.873979	0.354627	0.722021	25	18	17	24	22	19	26	29	12	18	8
	ENSMUSG00000001663.11	Gstt1	0.0079499	2.63601	0.00168721	0.967409	1	52	62	19	30	37	46	41	60	32	52	23
	ENSMUSG00000001665.12	Gstt3	-0.037282	3.53284	0.0502763	0.823554	1	73	67	36	54	56	61.83	56	95	47	61	35
	ENSMUSG00000001666.9	Ddt	-0.279316	3.05462	1.90114	0.174468	0.617516	68	65	14	50	54	61.87	47	88	28	41	15
	ENSMUSG00000001670.14	Tat	1.4152	-1.6239	1.90075	0.208944	0.617516	0	0	0	0	0	0	0	0	0	1	0
	ENSMUSG00000001672.15	Marveld3	0.0373403	2.38046	0.0258585	0.872935	1	15	25	6	21	15	23	19	23	18	21	9
	ENSMUSG00000001674.12	Ddx18	0.0108571	5.12499	0.00842378	0.927261	1	251.67	267.69	107.17	254.48	221.24	234.55	195.08	273.98	227.26	249.12	190.43
	ENSMUSG00000001687.16	Ubl3	-0.182754	7.17086	3.05875	0.0868213	0.475713	852	924	536	944	823	1016	729	970	765	777	667
	ENSMUSG00000001700.11	Gramd3	-0.16641	5.14022	2.05531	0.158285	0.602603	184	212	88	177	178	202	143	215	152	151	127
	ENSMUSG00000001707.9	Eef1e1	0.262134	3.69945	2.69419	0.107379	0.527343	89	105	24	81	61	70	83	109	99	76	60
	ENSMUSG00000001729.15	Akt1	-0.0158327	7.38002	0.0273578	0.869336	1	1346	1521	601	1135	1137	1134	1206	1355	1157	1098	945
	ENSMUSG00000001739.15	Cldn15	-0.342955	0.51775	0.731333	0.396783	0.761599	10	9	3	9	7	11	6	15	5	6	1
	ENSMUSG00000001741.13	Il16	-0.0494416	5.35861	0.193136	0.66233	0.946974	393.96	319.72	122.83	257.34	276.6	430.56	275.42	380.31	274.25	280.66	223.26
	ENSMUSG00000001750.17	Tcirg1	-0.49692	6.99347	16.4813	0.000211721	0.0359791	1176	1298	640	1099	1143	1115	835	1162	656	845	542
	ENSMUSG00000001751.10	Naglu	-0.602527	3.96521	18.3512	8.99325e-05	0.0240705	139	153	49	124	115	132	83	125	62	75	52
	ENSMUSG00000001755.13	Coasy	0.174244	4.37683	2.00907	0.162946	0.611281	136	144	40	117	112	130	116	172	110	129	107
	ENSMUSG00000001761.8	Smo	0.0753917	5.59215	0.434519	0.512992	0.846747	374	382	157	249	254	328	350	298	275	302	292
	ENSMUSG00000001763.15	Tspan33	-0.0499195	1.20486	0.0274114	0.869209	1	21	15	6	23	13	21	11	19	8	24	17
	ENSMUSG00000001767.6	Crnkl1	0.198464	4.86021	2.91538	0.0943265	0.493364	211	215	48	160	156	236	156	246	212	178	159
	ENSMUSG00000001768.17	Rin2	-0.0113409	7.93186	0.0127437	0.910599	1	2023	2049	634	1777	1601	1858	1495	2156	1795	1509	1235
	ENSMUSG00000001773.15	Folh1	1.3889	-1.56463	1.91475	0.208944	0.617516	0	0	0	0	0	0	0	1	0	0	0
	ENSMUSG00000001774.9	Chordc1	0.108334	5.12011	0.756476	0.388847	0.75519	186	185	58	172	190	213	136	243	209	193	121
	ENSMUSG00000001783.4	Rtcb	0.226142	6.18381	4.0309	0.0504325	0.401833	560	564	260	422	449	516	496	585	628	448	553
	ENSMUSG00000001785.14	Pwp1	-0.06172	4.37122	0.232958	0.631576	0.928692	152	124	48	114	122	183	123	168	89	130	82
	ENSMUSG00000001786.15	Fbxo7	0.108816	4.7312	0.855839	0.359624	0.727198	206.64	176.28	67.79	157.54	147.6	173.25	154.31	195	197	168	119.69
	ENSMUSG00000001794.14	Capns1	-0.211803	7.11609	3.41338	0.0709588	0.449283	1275	1268	316	867	922	1336	901	1381	604	930	469
	ENSMUSG00000001802.17	Lrp3	-0.0135598	3.4841	0.00695927	0.93387	1	124	117	34	66	58.54	74	94	103.89	57	78.94	55
	ENSMUSG00000001804.10	Dsg4	-0.17004	0.47123	0.0752961	0.784977	1	5	2	3	2	3	2	2	6	1	4	0
	ENSMUSG00000001815.16	Evx2	0.381944	0.498667	0.83992	0.364091	0.73166	15	4	0	6	6	11	6	10	7	14	7
	ENSMUSG00000001819.5	Hoxd13	0.00102725	3.10654	2.55321e-05	0.99599	1	94	64	17	47	46	89	45	68	48	80	46
	ENSMUSG00000001823.6	Hoxd12	-0.607461	-0.62526	0.978354	0.327662	0.692119	7	5	1	1	5	6	0	4	1	3	5
	ENSMUSG00000001827.13	Folr1	-1.80488	-1.32113	2.82568	0.0993918	0.505997	1	0	1	1	0	3	1	0	0	0	0
	ENSMUSG00000001829.18	Clpb	0.0728362	4.63867	0.325125	0.571256	0.88794	180	153	59	122	156	166	114	198	129	168	124
	ENSMUSG00000001833.18	Septin7	0.0390093	6.90612	0.133016	0.716958	0.973481	824.38	718	194	575	570	1101.36	550	915.38	680	646	497
	ENSMUSG00000001844.11	Zdhhc4	-0.213881	4.39465	3.12309	0.083672	0.469286	165	163	74	126	125	173	118	190	97	127	79
	ENSMUSG00000001847.15	Rac1	-0.136299	8.06421	2.00567	0.163295	0.61208	1955.68	1843.17	618.75	1699.02	1682.02	2217.36	1421.81	2168.24	1274.01	1690.59	1043.04
	ENSMUSG00000001855.16	Nup214	-0.0838877	6.36172	0.650397	0.424026	0.781177	652.76	618.04	150.33	429	446.41	659.94	459.61	688.79	396	461.86	281.94
	ENSMUSG00000001864.14	Aif1l	0.226945	4.72327	1.80099	0.186254	0.617516	81	65	21	48	37	70	53	84	85	54	36
	ENSMUSG00000001865.3	Cpa3	-0.0174673	3.47284	0.00382876	0.951198	1	70	47	6	35	56	94	35	113	29	60	17
	ENSMUSG00000001870.17	Ltbp1	0.125368	7.03688	1.64015	0.206579	0.617516	1183	1079	375	776	897	1011	919	1152	868	1023	817
	ENSMUSG00000001891.17	Ugp2	0.122249	6.5179	1.04506	0.312055	0.674974	737	503	129	422	455	819	422	716	523	604	391
	ENSMUSG00000001901.16	Kcnh6	-1.55876	-1.02726	1.6446	0.205975	0.617516	2	1	0	1	1	0	1	0	0	0	0
	ENSMUSG00000001909.17	Trmt1	0.00912512	5.30778	0.00681967	0.934535	1	277	281	132	216	237	244	233	299	223	250	187
	ENSMUSG00000001910.6	Nacc1	-0.0917894	6.6456	0.96709	0.330434	0.694673	794.21	807.55	293.91	563.96	649.71	688.72	666.7	782.52	495.84	619	434.59
	ENSMUSG00000001911.17	Nfix	0.07745	8.77044	0.619479	0.435186	0.790632	3708.37	3327.73	1252.65	2127.8	2325.53	3255.64	3120.68	3362.19	2497.24	2737.83	2228.59
	ENSMUSG00000001918.18	Slc1a5	-0.375582	6.38878	11.0834	0.00169854	0.0929021	775	849	386	518	656	681	582	739	410	555	314
	ENSMUSG00000001924.16	Uba1	-0.177003	8.0688	3.64279	0.0624198	0.432544	2117	2126	677	1572	1709	2078	1542	2224	1292	1504	1044
	ENSMUSG00000001930.18	Vwf	-0.455093	5.87119	16.3461	0.000194192	0.0343707	583	502	241	541	522	537	332	452	316	342	357
	ENSMUSG00000001942.9	Siae	-0.192351	4.03683	2.08378	0.155493	0.595962	118.98	121.33	29	92.45	100.69	140.11	86.08	111.97	87.92	80.81	63.36
	ENSMUSG00000001943.9	Vsig2	-0.362391	0.935317	1.4563	0.23355	0.628623	16	11	7	10	18	22	7	19	10	9	10
	ENSMUSG00000001946.15	Esam	-0.224474	4.29291	2.96065	0.0918807	0.487537	184	146	75	160	180	168	104	185	108	145	122
	ENSMUSG00000001948.11	Spa17	-0.157575	-0.732149	0.0366317	0.84904	1	2	1	1	2	0	2	0	3	0	1	2
	ENSMUSG00000001962.9	Fam50a	0.313678	4.14616	4.28676	0.0439195	0.376405	138	136	50	93	106	130	145	114	187	90	123
	ENSMUSG00000001964.15	Emd	-0.220405	4.6691	1.8869	0.177806	0.617516	219.31	191.14	51	94.31	140.21	209.69	127.5	235.74	90.99	142.41	54.5
	ENSMUSG00000001983.8	Taco1	-0.0223388	2.63805	0.0118673	0.913715	1	49.8	37.88	17	30.92	27.72	46.82	40	42.8	39	32.83	18
	ENSMUSG00000001985.10	Grik3	0.125852	1.05908	0.162604	0.688596	0.956239	16	15	5	13	12	7	13	21	13	6	10
	ENSMUSG00000001986.17	Gria3	-0.232973	2.87151	1.40104	0.242492	0.628623	97	45	14	48	49	77	40	53	47	54	32
	ENSMUSG00000001988.10	Npas1	1.16218	-0.271314	4.38264	0.0417196	0.370141	2	3	2	1	1	5	3	9	2	7	6
	ENSMUSG00000001995.10	Sipa1l2	-0.0794071	6.17054	0.63736	0.428677	0.785463	503	568	264	465	487	498	438	593	400	460	377
	ENSMUSG00000001998.16	Ap4e1	0.150049	4.87811	1.88209	0.1766	0.617516	203	192	63	117	138	218	137	227	171	191	125
	ENSMUSG00000001999.16	Blvra	-0.0729859	4.18884	0.279559	0.599474	0.90616	149	148	62	127	155	161	140	126	140	104	119
	ENSMUSG00000002006.13	Pdzd4	-0.153523	3.58688	1.01478	0.31891	0.682743	97	84	46.62	74.44	85	84	68.56	76	65.07	72	73.94
	ENSMUSG00000002007.6	Srpk3	-0.15169	2.52605	0.554515	0.46018	0.804816	60	40	18	29	41	54	42	41	25	26	43
	ENSMUSG00000002010.18	Idh3g	-0.167431	5.32133	2.66177	0.109459	0.531185	320	288	115	239	223	332	211	354	189	219	168
	ENSMUSG00000002012.14	Pnck	-0.159727	-0.405266	0.0779679	0.781293	1	9	3	3	7	1	1	1	3	4	6	4
	ENSMUSG00000002014.13	Ssr4	0.00674536	5.34898	0.00416376	0.948824	1	356	288	98	184	233	301	218	319	245	237	187
	ENSMUSG00000002015.6	Bcap31	0.138515	6.08715	1.15156	0.28972	0.649744	463	561	199	406	454	428	415	454	586	351	471
	ENSMUSG00000002017.11	Fam98a	0.273671	4.83538	5.24118	0.0265877	0.317099	203	176	41	127	155	237	174	226	198	168	144
	ENSMUSG00000002020.16	Ltbp2	-0.372003	5.91009	9.34486	0.00367934	0.1334	516.73	609.95	284.02	480.35	522.75	493.44	431.97	471.18	301.37	437.54	296.86
	ENSMUSG00000002028.14	Kmt2a	-0.107966	7.92655	1.29126	0.261568	0.628623	1893.85	1922.83	533.33	1378.43	1425.91	2179.66	1342.7	2050.23	1282.61	1435.61	994.72
	ENSMUSG00000002031.14	Ift46	-0.116133	4.04167	0.706259	0.404937	0.766525	128	98	42	97	97	131	73	111	83	102	83
	ENSMUSG00000002032.18	Tmem25	0.814013	0.492225	3.23134	0.078657	0.455758	7	7	2	5	0	9	6	10	10	5	12
	ENSMUSG00000002033.15	Cd3g	-0.667279	2.28724	6.55468	0.0139253	0.238629	42	55	14	28	33	48	29	25	31	21	8
	ENSMUSG00000002043.18	Trappc6a	-0.168292	3.25592	0.815299	0.371155	0.73892	51	62	42	55	53	49	49	51	39	47	53
	ENSMUSG00000002052.7	Supt6	0.206134	7.02138	4.68426	0.0355449	0.346837	998.1	1097.31	352.41	758.98	790.99	837.26	908.2	1097.78	1032.1	791.17	787.12
	ENSMUSG00000002055.10	Spag5	-0.0485903	4.02752	0.118738	0.731942	0.983573	132	132	45	70	124	106	81	100	102	115	86
	ENSMUSG00000002057.5	Foxn1	0.0436948	3.50453	0.0280522	0.868018	1	29	38	5	25	24	34	34	39	14	41	5
	ENSMUSG00000002058.14	Unc119	-0.385128	2.73184	4.38278	0.0417165	0.370141	59	54	29	44	52	69	40	65	26	40	30
	ENSMUSG00000002059.19	Rab34	-0.149813	3.87749	1.12629	0.293982	0.654922	139	113	33	73	94	107	102	104	68	95	46
	ENSMUSG00000002064.11	Sdf2	0.0685031	4.52296	0.31772	0.575656	0.890522	147.9	140.69	63.59	107.02	143.01	169.74	135.8	151.22	136.9	126.83	120.88
	ENSMUSG00000002068.17	Ccne1	-0.273708	2.51829	1.74441	0.192966	0.617516	52	64	22	42	34	52	28	48	39	32	36
	ENSMUSG00000002076.13	Hsf2bp	1.0761	-0.141313	4.06768	0.0494346	0.397806	4	2	4	3	3	0	5	12	3	10	1
	ENSMUSG00000002083.14	Bbc3	-0.181104	2.44371	0.599963	0.442465	0.79687	34	40	32	36	37	27	26	29	47	25	31
	ENSMUSG00000002100.16	Mybpc3	0.545778	0.0298763	1.52598	0.222846	0.628623	7	3	1	7	6	6	8	11	4	10	4
	ENSMUSG00000002102.16	Psmc3	0.0676478	6.96857	0.182799	0.672677	0.947772	943	1076	544.11	754	867.29	753	910	872	1043	701	897
	ENSMUSG00000002103.17	Acp2	-0.407957	6.17411	5.11952	0.0337604	0.342014	653.61	583.18	115.81	500.28	526.4	779.83	341.91	707.63	289.04	419.53	206.87
	ENSMUSG00000002104.12	Rapsn	0.273147	1.3259	0.777833	0.382286	0.748896	17	11	7	11	18	15	14	19	14	18	15
	ENSMUSG00000002105.16	Slc39a13	-0.399839	4.56822	9.60924	0.00326438	0.126325	237	197	83.89	140	160.71	188	159	173	96	129	86
	ENSMUSG00000002107.19	Celf2	-0.208943	6.93921	2.66086	0.111373	0.532525	1096	1076	237	741	813	1490	613	1164	657	864	507
	ENSMUSG00000002108.11	Nr1h3	-0.482235	3.96935	5.99303	0.0203693	0.28325	125	130	99	142	130	128	100	118	108	70	81
	ENSMUSG00000002109.15	Ddb2	-0.178117	3.28905	1.03867	0.31334	0.6765	62.39	63.82	10.19	55.72	43.6	58.17	46.09	62.37	34.96	37.47	32.13
	ENSMUSG00000002111.9	Spi1	-0.230075	6.43475	2.52451	0.122884	0.537849	736	866	338	787	650	680	602	800	543	544	472
	ENSMUSG00000002129.12	Sf3a1	0.202339	6.19083	4.18803	0.0463171	0.38487	542	661	190	396	451	506	515	637	554	421	468
	ENSMUSG00000002147.19	Stat6	0.111297	7.17769	1.25822	0.267677	0.628623	1064	1233	378	788	841	1092	969	1100	1127	762	811
	ENSMUSG00000002190.14	Clgn	-0.753123	-1.20118	0.857966	0.359033	0.726469	2	3	0	1	1	2	0	0	1	2	1
	ENSMUSG00000002204.10	Napsa	-0.489534	4.50643	7.58771	0.00976103	0.205956	166.69	202	62.13	169.61	178.54	211.98	107.86	232.62	96	111.98	60
	ENSMUSG00000002205.17	Vrk3	-0.127935	4.34322	1.13706	0.291712	0.651985	176	135	52	125	104	168	114	165	107	117	77
	ENSMUSG00000002210.12	Smg9	-0.171607	4.70218	2.09803	0.154117	0.593413	209	242	91	192	182	213	175	196	159	158	149
	ENSMUSG00000002221.12	Paxip1	0.0436436	5.16815	0.160998	0.690055	0.956885	307	259	70	214	179	279	237	305	184	219	158
	ENSMUSG00000002222.15	Rmnd5a	0.345956	7.2296	12.047	0.00112144	0.0759099	865	614	241	561	631	972	674	1057	815	805	673
	ENSMUSG00000002227.16	Mov10	-0.397225	5.8626	8.06235	0.00755071	0.183058	468	637	207	467	442	461	372	539	264	329	243
	ENSMUSG00000002228.8	Ppm1j	0.172489	1.91127	0.488175	0.48818	0.826879	23	25	12	15	23	27	32	25	29	10	21
	ENSMUSG00000002233.14	Rhoc	0.0285053	5.7654	0.044465	0.834149	1	439	598	222	396	363	372	440	438	439	396	346
	ENSMUSG00000002249.22	Tead3	0.462288	5.51603	14.2999	0.000439067	0.0507205	186	220	97	138	137	169	241	297	205	179	190
	ENSMUSG00000002250.17	Ppard	-0.0764147	5.40662	0.456372	0.502629	0.838955	334	318	108	217	219	325	258	372	176	270	139
	ENSMUSG00000002257.9	Def6	-0.24892	4.58509	3.07815	0.0858581	0.473127	157.04	198.02	113.53	157.67	184.18	177.08	162.16	142.64	134.27	143.74	130.67
	ENSMUSG00000002265.18	Peg3	-0.253678	5.07417	3.02642	0.0900268	0.48359	345	264	121	260	263	321	202	220	215	193	247
	ENSMUSG00000002266.18	Zim1	-0.306163	0.605456	0.825257	0.368275	0.736422	15	6	4	8	10	16	7	10	7	6	9
	ENSMUSG00000002274.14	Metrn	-0.242279	2.68792	1.77988	0.188583	0.617516	44.83	52	21	44	55	55	44	51	26	38	34
	ENSMUSG00000002279.20	Lmf1	-0.36416	4.007	5.25294	0.026427	0.316201	126	135	57	104	93	151	108	142	54	98	42
	ENSMUSG00000002280.12	Ciao3	-0.0799027	4.51074	0.460122	0.500888	0.837559	185.32	146.13	56.2	123.33	117.97	175.92	123.98	204.47	114.96	106.14	89.87
	ENSMUSG00000002289.17	Angptl4	-0.325271	4.9381	2.70803	0.113189	0.532525	260	224	94	192	169	283	179	230	116	222	78
	ENSMUSG00000002297.17	Dbf4	-0.164643	3.91189	1.17121	0.284664	0.643739	123	122	26	100	76	128	77	109	75	99	58
	ENSMUSG00000002307.17	Daxx	0.114134	6.87073	0.640418	0.430032	0.78691	974	974	421	872	765	855	972	1146	975	785	623
	ENSMUSG00000002308.17	Cd320	0.119679	2.26102	0.308311	0.581348	0.894323	37	33	16	21	25	26	36	33	23	29	23
	ENSMUSG00000002319.17	Ipo4	-0.0444169	5.55064	0.140966	0.709009	0.968411	356.21	434	179.51	224.95	281.09	350	324.08	406	257	301.2	224
	ENSMUSG00000002320.16	Tm9sf1	-0.0255991	5.80919	0.0511072	0.822126	1	374.45	436	221.92	301.33	329.08	381	372.12	406	322	302.14	318
	ENSMUSG00000002324.9	Rec8	-0.248166	1.3275	0.383091	0.542075	0.869764	6	4	2	4	5	9	6	8	3	1	3
	ENSMUSG00000002325.16	Irf9	-0.0688005	6.8384	0.437043	0.511775	0.846701	851	857	229	719	649	846	685	945	598	635	416
	ENSMUSG00000002326.7	Gmpr2	0.176841	3.6147	1.25563	0.268165	0.628623	85.96	97.65	48.38	65.34	92.37	94.94	102.55	89.51	93.46	80.23	91.44
	ENSMUSG00000002329.8	Mdp1	-0.173646	3.78415	1.41808	0.246565	0.628623	85	78	53	81	73	98	74	98	62	72	53
	ENSMUSG00000002332.17	Dhrs1	-0.256945	5.02607	5.50423	0.0232324	0.298608	183	176	71	150	180	199	133	203	124	126	94
	ENSMUSG00000002341.9	Ncan	0	-1.59363	0	1	1	0	0	0	0	0	0	0	0	0	0	0
	ENSMUSG00000002342.18	Tmem161a	0.114565	4.29701	0.891791	0.349814	0.716641	171	150	59	110	111	132	143	151	124	117	121
	ENSMUSG00000002343.12	Armc6	-0.2727	2.85429	1.33264	0.255256	0.628623	43	51.04	41.15	39.3	44.77	32.58	38.46	49.64	23.15	47	27.73
	ENSMUSG00000002345.19	Borcs8	0.244799	3.0147	1.65613	0.204419	0.617516	60	46	26	32	34	41	58	61	63	34	25
	ENSMUSG00000002346.17	Slc25a42	0.149936	3.24806	0.795434	0.376998	0.744864	72	65	18	40	37	61	58	75	59	48	29
	ENSMUSG00000002365.11	Snx9	-0.0438695	6.19863	0.203558	0.653936	0.94483	499	572	234	458	491	559	480	544	450	496	336
	ENSMUSG00000002372.10	Ranbp3	-0.0739522	5.90788	0.482077	0.490895	0.828977	447	470	224	357	434	417	392	465	360	341	343
	ENSMUSG00000002379.8	Ndufa11	-0.461797	4.41769	9.64175	0.00321686	0.125988	178	158	70	112	149	166	131	144	62	126	52
	ENSMUSG00000002384.3	Bmp8b	0.0996486	0.262724	0.0418759	0.838739	1	8	4	4	1	3	5	4	3.21	10	1	4
	ENSMUSG00000002393.15	Nr2f6	-0.327969	4.57932	2.11407	0.160131	0.606561	150.4	152.99	140.54	151.41	143.77	111.39	132.33	140.85	95.66	147.11	100.3
	ENSMUSG00000002395.15	Use1	0.00349147	5.38097	0.000503534	0.982244	1	291	289	193	233	294	239	263	296	296	235	256
	ENSMUSG00000002396.9	Ocel1	0.0722659	4.75037	0.328303	0.569387	0.886363	198.6	164.01	85.46	150.59	156.23	163.61	185.67	242.15	146.34	132.89	122.7
	ENSMUSG00000002409.19	Dyrk1b	-0.120557	4.0563	0.679507	0.413914	0.77377	121	107	30	92	83	132	97	120	57	90	63
	ENSMUSG00000002413.16	Braf	0.146695	6.3517	1.84495	0.180846	0.617516	595	571	134	360	401	727	427	677	502	496	372
	ENSMUSG00000002416.14	Ndufb2	-0.264982	4.03047	3.5177	0.0669258	0.446014	134	94	47	93	104	104	96	117	58	80	56
	ENSMUSG00000002428.13	Hltf	-0.0827181	4.90466	0.40227	0.528989	0.860113	202.98	163	40	166.98	154.98	259.97	127	189	161	159	115
	ENSMUSG00000002455.15	Prpf6	0.00267082	5.62504	0.000609697	0.980405	1	323	314	172	290	321	343	276	372	304	293	266
	ENSMUSG00000002458.14	Rgs19	-0.61942	4.94119	17.1766	0.000178935	0.0343291	236	270	161	237	236	277	176	273	123	166	89
	ENSMUSG00000002459.18	Rgs20	0.349031	2.68559	1.59355	0.213038	0.622398	15	5	3	9	10	20	7	23	13	15	8
	ENSMUSG00000002475.17	Abhd3	0.202581	0.944143	0.408689	0.525734	0.857629	14	15	4	12	9	8	18	10	12	12	7
	ENSMUSG00000002477.6	Snrpd1	0.204129	3.93278	1.23303	0.274355	0.632526	121	173	14	86	80	119	106	150	107	87	93
	ENSMUSG00000002486.16	Tchp	0.0904235	3.40211	0.366705	0.547714	0.872796	72	93	37	62	69	72	80	84	73	61	64
	ENSMUSG00000002489.17	Tiam1	0.193103	8.06007	4.10333	0.048488	0.393802	1423	1634	575	1203	1126	1361	1389	1713	1439	1244	1204
	ENSMUSG00000002496.11	Tsc2	-0.151017	6.27981	2.73421	0.104874	0.520348	608.22	566.1	199.44	446.4	503.85	554.39	435.72	598.61	374.03	463.78	301.53
	ENSMUSG00000002500.16	Rpl3l	0.678926	4.50675	10.9396	0.00294629	0.120023	188	133	61	64	87	164	184	229	198	122	178
	ENSMUSG00000002504.16	Slc9a3r2	-0.360606	3.74047	5.79408	0.0200543	0.280898	107	114	54	104	107	107	88	121	68	62	59
	ENSMUSG00000002524.18	Puf60	-0.0446709	6.06986	0.196484	0.659605	0.946974	518	593	181	411	405	461	425	477	448	384	324
	ENSMUSG00000002546.18	Golga2	0.08436	6.28227	0.709697	0.403804	0.76596	531	582	229	401	447	502	509	567	504	396	414
	ENSMUSG00000002550.17	Uck1	-0.146161	4.18097	1.42236	0.238992	0.628623	141.65	155.6	51	101.79	116	123.8	98	151.68	102.45	109.01	65.31
	ENSMUSG00000002565.17	Scin	0.379427	4.8152	10.419	0.00227364	0.106084	168	167	66	110	126	174	173	222	190	169	127
	ENSMUSG00000002578.19	Ikzf4	0.240532	2.78353	1.73292	0.194411	0.617516	31	31	15	23	25	38	36	54	24	30	20
	ENSMUSG00000002580.8	Mien1	-0.0804339	3.8038	0.280352	0.598959	0.905765	104	90	38	87	84	80	56	112	76	70	71.97
	ENSMUSG00000002588.14	Pon1	-2.32879	-0.857907	5.48753	0.0234313	0.299849	2	3	0	2	2	0	1	0	0	0	0
	ENSMUSG00000002602.17	Axl	-0.124785	8.24842	1.84951	0.180318	0.617516	2530	2673	1158	2050	2124	2455	2000	2672	1856	2140	1532
	ENSMUSG00000002603.16	Tgfb1	-0.173985	6.46064	2.49581	0.120846	0.534836	703	750	390	615	653	750	624	781	548	500	503
	ENSMUSG00000002608.9	Ccdc97	-0.127239	5.75903	1.34602	0.251825	0.628623	478	483	216	354	381	379	396	417	333	313	317
	ENSMUSG00000002617.15	Zfp40	0.406812	2.83054	4.07667	0.049194	0.397105	50	30	4	32	32	41	40	52	54	36	22
	ENSMUSG00000002625.11	Akap8l	0.129086	5.41856	1.01523	0.318804	0.682712	333	270	161	217	250	247	321	305	275	210	264
	ENSMUSG00000002633.5	Shh	1.38946	-1.39805	1.81792	0.208944	0.617516	0	0	0	0	0	0	0	1	0	0	0
	ENSMUSG00000002635.12	Pdcd2l	-0.00644173	3.33712	0.0017208	0.968824	1	66	79	37	66	64	81	61	73	62	54	76
	ENSMUSG00000002658.10	Gtf2f1	0.259167	5.0674	3.70099	0.0605099	0.427586	245	300	92	212	221	235	242	263	315	174	277
	ENSMUSG00000002660.9	Clpp	-0.0279153	3.34652	0.0278801	0.868106	1	66	95	36	45	54	71	57	70	60	60	54
	ENSMUSG00000002661.15	Alkbh7	-0.234263	1.81262	0.437894	0.51288	0.846747	14	20	16	20	28	12	19	25	2	26	11
	ENSMUSG00000002664.3	Pspn	1.3889	-1.59455	1.96167	0.208944	0.617516	0	0	0	0	0	0	0	1	0	0	0
	ENSMUSG00000002668.9	Dennd1c	-0.193123	4.84367	2.03179	0.160636	0.607414	235	271	94	223	208	259	186	266	199	176	126
	ENSMUSG00000002679.15	Med6	0.00262646	3.16257	0.000239578	0.996754	1	61	76	19	43	45	60	44	74	39	58	38
	ENSMUSG00000002688.9	Prkd1	0.00895077	2.28252	0.00202013	0.964341	1	33	34	15	22	42	45	26	40	34	32	28
	ENSMUSG00000002699.14	Lcp2	-0.42538	6.24413	8.14817	0.00792747	0.187464	673	642	210	593	619	730.94	422	676	412	438	235
	ENSMUSG00000002718.15	Cse1l	0.0555681	5.90418	0.201265	0.65576	0.945839	439	342	91	262	319	502	263	510	294	397	198
	ENSMUSG00000002728.15	Naa20	0.0485423	5.17015	0.11461	0.736774	0.98691	319.11	325.16	62	169.54	148.45	303.79	186.57	288.51	226.65	216.65	176.2
	ENSMUSG00000002731.7	Prkra	-0.130159	2.90509	0.384075	0.538419	0.86777	47	44	6	38	32	57	25	60	28	37	19
	ENSMUSG00000002732.15	Fkbp7	-0.438251	2.83668	5.27254	0.0261616	0.315495	71	47	18	38	45	79	39	44	19	40	36
	ENSMUSG00000002733.9	Plekha3	0.00129559	4.58564	0.000114254	0.991517	1	199	163	54	135	150	183	115	213	138	177	95
	ENSMUSG00000002741.10	Ykt6	0.310858	6.67742	7.72153	0.00781479	0.185558	714	767	341	606	595	631	745	783	871	632	767
	ENSMUSG00000002748.8	Baz1b	0.0350941	7.61349	0.12679	0.723375	0.978051	1484	1491	666	1265	1272	1474	1249	1528	1512	1181	1139
	ENSMUSG00000002763.17	Pex6	-0.428875	4.66016	3.15734	0.0903937	0.484415	154	164	145	185	175	137	125	164	107	137	114
	ENSMUSG00000002767.14	Mrpl2	0.0470293	4.3127	0.096698	0.757202	1	147	157	79	142	121	139	164	151	128	112	131
	ENSMUSG00000002768.9	Mea1	0.283909	4.53169	2.88822	0.0983848	0.503983	160	206	86	97	139	132.61	187	148.04	184	112.5	194
	ENSMUSG00000002769.10	Gnmt	0.613225	-0.312608	0.631764	0.431003	0.787436	5	0	1	3	0	0	4	4	4	0	0
	ENSMUSG00000002771.13	Grin2d	-0.063989	2.1491	0.0648887	0.800039	1	38.78	24.52	12.47	10	23	24.03	16	26.68	21	18.63	22.63
	ENSMUSG00000002778.15	Kdelr1	-0.145843	5.39756	0.970023	0.331556	0.695849	350	275	69	193	182	380	247	348	152	228	99
	ENSMUSG00000002781.20	Tmem143	-0.138645	3.22767	0.769521	0.427429	0.784378	71	63	30	48	53	60	50	81	51	40	31
	ENSMUSG00000002791.18	Pdxk-ps	-0.488118	-1.47924	0.189396	0.670373	0.946974	0	0	0	0	1	1	1	0	0	0	0
	ENSMUSG00000002797.10	Ggct	0.617961	5.71389	16.1145	0.000308203	0.0422312	114	152	57	89	108	122	141	208	255	105	121
	ENSMUSG00000002799.7	Jag2	-0.01306	6.49024	0.0125424	0.911305	1	542	515	294	507	437	442	503	509	410	545	381
	ENSMUSG00000002803.15	Btbd6	-0.310807	4.27594	4.09859	0.0486126	0.394515	138	120	55	105	147	143	112	153	53	121	51
	ENSMUSG00000002804.5	Nudt14	0.164783	2.37883	0.705709	0.405118	0.766565	42	40	10	29	30	28	33	42	29	29	32
	ENSMUSG00000002808.8	Epdr1	-0.122804	4.64739	0.78477	0.380189	0.747024	207	192	96	125	170	190	153	224	91	192	113
	ENSMUSG00000002812.5	Flii	-0.0131405	7.31805	0.0202	0.887586	1	1348	1349	442	1011	1065	1265	1080	1433	1123	937	773
	ENSMUSG00000002814.16	Top3a	0.15543	4.25158	1.58489	0.214265	0.62451	152	172	60	118	122	153	122	183	132	154	129
	ENSMUSG00000002820.7	Atg4d	0.155781	5.23745	2.41673	0.126743	0.543709	288.82	257.59	100.01	193.92	196.42	250.13	237.69	329.56	233.15	205.69	193.48
	ENSMUSG00000002825.9	Qtrt1	-0.116872	3.05043	0.396502	0.531946	0.86213	58	56	46	42	57	58	55	76	44	43	40
	ENSMUSG00000002831.15	Plin4	-0.126427	7.15623	0.505487	0.484675	0.823719	1118	753	624	849	969	1144	786	1630	642	872	614
	ENSMUSG00000002833.12	Hdgfl2	0.137712	5.19385	1.09688	0.300299	0.661025	309	291	154	221	227	260	273	282	324	220	259
	ENSMUSG00000002835.10	Chaf1a	0.10245	5.19596	0.291589	0.594378	0.902697	261.96	304.17	167	261.55	260.38	217.64	248.43	226.21	279.62	246.57	334.94
	ENSMUSG00000002844.10	Adprh	0.137526	5.54812	1.10083	0.300024	0.660923	342	432	203	294	289	297	350	394	398	274	333
	ENSMUSG00000002845.15	Tmem39a	-0.232356	4.46553	3.78194	0.0577961	0.419442	190	184	57	138	128	190	113	167	128	126	90
	ENSMUSG00000002846.10	Timmdc1	0.363557	3.31691	4.81767	0.0331361	0.340033	67	66	29	48	53	48	62	78	74	48	72
	ENSMUSG00000002847.8	Pla1a	-0.0596367	3.44698	0.0762103	0.784177	1	88	97	15	30	57	87	66	84	47	51	41
	ENSMUSG00000002870.9	Mcm2	-0.0660105	5.4772	0.339453	0.562926	0.881979	378	394	166	309	305	320	297	319	335	298	253
	ENSMUSG00000002871.15	Tpra1	-0.605485	4.59788	12.6128	0.00112011	0.0759099	136	133	110	141	177	135	97	151	60	110	75
	ENSMUSG00000002881.15	Nab1	0.0798995	6.65278	0.624906	0.433194	0.789053	704	671	215	504	516	884	491	811	660	634	430
	ENSMUSG00000002885.15	Adgre5	-0.0565983	6.29498	0.215634	0.644665	0.938571	720.58	710.12	144.37	429.29	473.07	795.48	540.04	817.61	453.25	460.77	288.7
	ENSMUSG00000002897.6	Il17ra	0.000931154	6.33728	5.97876e-05	0.993865	1	612	671	299	475	573	583	593	703	502	588	377
	ENSMUSG00000002900.18	Lamb1	-0.144418	6.43182	2.33173	0.133453	0.554857	792	807	326	644	680	770	548	734	602	592	563
	ENSMUSG00000002908.18	Kcnn1	-0.188652	1.16921	0.366811	0.58234	0.895056	20	10	13	10	12	18	10	19	13	12	9
	ENSMUSG00000002910.12	Arrdc2	0.125388	3.73649	0.665233	0.418826	0.777146	100	69	48	77	80	88	85	137	82	62	70
	ENSMUSG00000002944.16	Cd36	-0.105142	6.32502	0.456777	0.505025	0.840871	545	539	115	490	463	860	411	754	476	381	263
	ENSMUSG00000002948.20	Map2k7	0.138009	5.7298	1.77335	0.18938	0.617516	409.47	422.56	135	286	305	420	350	435.8	418	292.89	289
	ENSMUSG00000002949.16	Timm44	0.259533	4.9321	4.68869	0.0354619	0.346596	230	200	60	165	186	208	191	246	200	159	220
	ENSMUSG00000002957.12	Ap2a2	-0.200509	7.2714	5.12986	0.0281615	0.323377	1406	1361.93	526.8	1131.93	1171.87	1371.93	1077.88	1356	886.76	982.92	793.92
	ENSMUSG00000002963.18	Pnkp	-0.185552	4.44627	1.72968	0.194822	0.617516	167	163	103	149	174	162	149	138	138	140	126
	ENSMUSG00000002968.10	Med25	-0.0781685	5.58269	0.498084	0.483821	0.822873	368	351	109	251	284	314	300	443	192	234	173
	ENSMUSG00000002980.15	Bcam	0.0259806	5.98408	0.0537862	0.817606	1	414	386	217	364	415	385	403	482	337	403	297
	ENSMUSG00000002981.11	Clptm1	-0.250492	6.49769	4.95918	0.0307728	0.33027	626	624	238	511	515	637	491	719	314	518	236
	ENSMUSG00000002983.18	Relb	0.000138069	5.18595	1.318e-06	0.999089	1	314	355	109	216	247	305	289	320	239	263	172
	ENSMUSG00000002984.18	Tomm40	0.171399	5.43233	1.84063	0.181347	0.617516	287.65	381	150	232	291	250.82	321	320.9	312	254	298
	ENSMUSG00000002985.17	Apoe	-0.0182263	8.39449	0.0266663	0.870983	1	2206	2524	1211	2245	1979	2061	2314	2612	2110	1655	1767
	ENSMUSG00000002992.18	Apoc2	-0.352319	0.752572	0.709482	0.403875	0.76596	14	13	0	14	5	10	6	20	3	6	2
	ENSMUSG00000002996.18	Hbp1	0.112686	6.33535	1.1232	0.294639	0.655448	476.3	401.35	124.93	321.14	376.65	570.58	318.15	537.06	428.46	432.25	286.88
	ENSMUSG00000002997.16	Prkar2b	-0.263282	3.77348	2.64702	0.11042	0.532525	101	103	31	85	94	126	53	121	63	91	49
	ENSMUSG00000003031.15	Cdkn1b	0.120147	5.84259	1.40325	0.242126	0.628623	389	306	116	260	272	448	302	404	328	319	241
	ENSMUSG00000003032.9	Klf4	0.507123	7.93925	17.3576	0.000151081	0.0321321	1192	1165	263	721	698	1179	1283	1485	1185	1043	914
	ENSMUSG00000003033.16	Ap1m1	-0.0435316	5.32647	0.152364	0.698047	0.961506	345	390	96	234	256	320	310	343	243	219	189
	ENSMUSG00000003037.17	Rab8a	0.008793	5.91132	0.00670365	0.935093	1	505	527	107	341	350	442	377	478	377	350	265
	ENSMUSG00000003038.16	Hmgn2	-0.0630106	6.55729	0.467174	0.497641	0.834585	736.42	717.32	239.85	591.81	605.49	740.53	531.64	659.76	518.01	678.38	468.45
	ENSMUSG00000003039.10	Fam32a	-0.160223	5.36458	2.28834	0.137034	0.561827	297	336	97	246	276	322	224	322	222	227	174
	ENSMUSG00000003051.14	Elf3	-0.159488	-0.420841	0.0624508	0.803751	1	2	1	3	3	2	2	2	2	2	3	1
	ENSMUSG00000003062.14	Stard3nl	-0.218029	4.97582	2.87771	0.0964173	0.499029	266	214	124	246	244	276	204	263	214	179	149
	ENSMUSG00000003068.18	Stk11	0.181914	6.14051	2.88506	0.0960055	0.498098	521.35	522.57	248.75	370.8	437.79	451.64	514.56	556.51	490.71	416.62	467.43
	ENSMUSG00000003070.7	Efna2	-0.70038	0.582127	3.40556	0.0730446	0.449283	8	7	6	8	9	7	5	10	4	3	2
	ENSMUSG00000003072.16	Atp5d	-0.333855	5.9574	6.25496	0.0167084	0.257416	470	331	199	361	376	423	324	464	170	346	190
	ENSMUSG00000003099.12	Ppp5c	-0.32315	5.24352	8.09654	0.00654709	0.173126	276	305	123	236	273	287	205	284	174	234	128
	ENSMUSG00000003119.15	Cdk12	0.0151185	6.99047	0.020214	0.887548	1	982	965	212	675	697	1090	706	1030	760	771	498
	ENSMUSG00000003123.16	Lipe	-0.346984	5.31335	8.04266	0.00671493	0.175555	299.41	295.67	125.61	222.51	213.63	296.51	172.43	353	155.81	195.06	116.37
	ENSMUSG00000003131.8	Pafah1b2	0.225381	6.48656	5.00145	0.0301026	0.328373	678	660	164	499	509	755	550	698	673	564	554
	ENSMUSG00000003134.11	Tbc1d8	-0.153706	5.09219	1.78802	0.187593	0.617516	228.51	197.48	98.31	214.45	199.14	243.97	168.78	245.12	147.01	210.45	133.38
	ENSMUSG00000003135.16	Cnot11	0.0511667	4.69621	0.184916	0.669144	0.946974	174	143	63	138	134	190	155	193	115	154	112
	ENSMUSG00000003153.11	Slc2a3	-0.441739	3.46249	6.82366	0.012035	0.224095	114	98	39	71	101	116	52	110	47	83	44
	ENSMUSG00000003154.16	Foxj2	-0.010206	5.80202	0.0102389	0.919831	1	458	403	142	306	274.97	466	379	436.98	315.99	326.96	222.98
	ENSMUSG00000003161.16	Sri	-0.0412008	5.55621	0.134991	0.714959	0.972179	375	373	88	272	286	473	274	402	282	274	231
	ENSMUSG00000003166.21	Dgcr2	0.034459	6.51099	0.150959	0.699373	0.962576	663.17	677.07	232	512.8	533.29	661.16	605.23	738.14	495.02	565.73	399.43
	ENSMUSG00000003184.16	Irf3	-0.000338756	5.38459	3.00531e-06	0.998632	1	257	277	209	214	297	224	275	289	273	213	259
	ENSMUSG00000003190.13	Bcl2l12	-0.540726	2.76385	6.57716	0.0135784	0.237139	51.23	47.82	33.95	42.94	43.42	38.01	38.29	34.49	22.26	38.31	20.25
	ENSMUSG00000003198.11	Zfp959	-0.0909536	2.74646	0.183919	0.669983	0.946974	44.01	18	11	31	28.39	44	16	50.47	22	35.58	16
	ENSMUSG00000003199.17	Mpnd	0.015044	4.10701	0.0121311	0.912765	1	142	151	61	114	111	105	102	127	132	110	108
	ENSMUSG00000003200.11	Sh3gl1	-0.199469	5.7996	3.9788	0.0518842	0.407031	400	452	159	265	301	387	271	419	239	306	210
	ENSMUSG00000003206.8	Ebi3	-0.468949	1.83851	3.32883	0.0744251	0.449283	32	25	7	34.73	25.88	31	20	33.81	15	23.82	3
	ENSMUSG00000003208.10	Yju2	-0.0190653	3.42539	0.0135707	0.907757	1	78	61	38.84	74.55	71.77	88	80.59	88	46	67	63
	ENSMUSG00000003226.8	Ranbp2	0.229046	8.46512	4.12304	0.047973	0.391774	2624	2337	541	2000	2019	3046	1748	3220	2655	2383	1795
	ENSMUSG00000003227.5	Edar	0.353856	0.95775	1.06878	0.306503	0.668146	15	5	3	12	8	9	13	8	12	17	5
	ENSMUSG00000003228.10	Grk5	0.00854833	4.85578	0.00557313	0.940807	1	262	214	71.96	167	181	232	160	228	206	210	130
	ENSMUSG00000003233.13	Dvl3	0.00924632	5.68856	0.00748464	0.931425	1	411	386	127	236	233	387	325	403	260	276	215
	ENSMUSG00000003234.17	Abcf3	0.0521171	5.10297	0.180445	0.672926	0.947772	284	243	116	198	221	264	229	291	223	192	217
	ENSMUSG00000003235.14	Eif2b5	-0.0960092	5.20276	0.600908	0.442108	0.796309	266	169	98	182	228	259	182	268	158	214	133
	ENSMUSG00000003269.18	Cyth2	-0.0902405	5.04092	0.465243	0.498526	0.835585	187.88	294.98	134.15	201.65	173.85	243	209.89	223.94	196.81	176.79	182.59
	ENSMUSG00000003271.18	Sult2b1	0.292506	3.7078	1.82232	0.183493	0.617516	30	26	8	22	21	20	33	47	22	18	12
	ENSMUSG00000003273.15	Car11	-0.61725	0.411524	2.2655	0.138964	0.565362	9	9	9	8	6	6	9	10	3	2	3
	ENSMUSG00000003279.18	Dlgap1	-0.298383	1.30042	0.965354	0.330864	0.695108	24	24	5	16	17	15	14	13	9	20	11
	ENSMUSG00000003282.10	Plag1	-0.179047	2.89781	0.600802	0.442625	0.796984	50	50	7	35	24	81	23	43	33	60	16
	ENSMUSG00000003283.16	Hck	-0.456091	6.25379	5.00495	0.0367021	0.351479	646	658	320	721	671	656	467	684	430	423	329
	ENSMUSG00000003299.11	Mrpl4	-0.121695	4.83725	1.11962	0.2954	0.655793	212	204	72	147	158	209	180	219	117	145	109
	ENSMUSG00000003308.16	Keap1	0.105218	6.28412	0.934073	0.338746	0.703486	563.51	568.92	273.61	505.01	523.67	534.13	531.02	578.87	551.54	467.62	554.52
	ENSMUSG00000003309.15	Ap1m2	0.118744	4.07252	0.550359	0.461856	0.805613	70	83	30	45	51	48	59	88	45	62	47
	ENSMUSG00000003316.15	Glg1	0.0330912	7.58317	0.143847	0.706191	0.966672	1539	1470	549	1139	1313	1561	1232	1600	1324	1133	1120
	ENSMUSG00000003341.10	Atp8b3	0.224348	-1.50613	0.0416198	0.854127	1	0	1	0	0	0	1	0	0	0	2	0
	ENSMUSG00000003344.15	Btbd2	-0.0196306	4.5102	0.0220201	0.882667	1	164	177	51	135	123	147	156	191	118	112	82
	ENSMUSG00000003345.17	Csnk1g2	0.0553801	6.25512	0.30005	0.586439	0.897298	601	613	261	475	435	485	522	609	488	463	441
	ENSMUSG00000003346.15	Abhd17a	-0.410688	4.98839	9.79262	0.00300575	0.122015	236	247	132	204	214	211	176	229	106	192	115
	ENSMUSG00000003348.11	Mob3a	-0.406652	5.25915	8.84855	0.00478542	0.148387	342	327	89	262	252	384	222	366	153	215	95
	ENSMUSG00000003352.15	Cacnb3	-0.320764	4.29844	5.0208	0.0298011	0.327453	163	198	69	94	100	185	111	115	108	111	87
	ENSMUSG00000003354.7	Ccdc65	-1.79988	-1.22635	2.68046	0.108255	0.529561	3	0	0	0	2	1	0	1	0	0	0
	ENSMUSG00000003355.8	Fkbp11	-0.87231	1.51631	10.7752	0.00194351	0.0985776	34	33	15	14	22	22	12	15	10	16	11
	ENSMUSG00000003360.16	Ddx23	0.0922837	6.15094	0.785014	0.380116	0.74698	532	502	243	442	480	510	484	523	528	467	428
	ENSMUSG00000003363.16	Pld3	-0.439502	5.80699	13.4755	0.000615661	0.0592865	404	436	151	356	382	437	305	451	199	278	138
	ENSMUSG00000003378.10	Grik5	-0.608947	3.415	15.694	0.000250974	0.0370235	119	103	44	86	74	89	70	74	47	56	38
	ENSMUSG00000003379.8	Cd79a	-0.536789	1.4421	2.72385	0.105516	0.522413	34	21	8	10	13	29	16	16	6	24	3
	ENSMUSG00000003380.12	Rabac1	-0.137078	5.70393	1.47591	0.230474	0.628623	418	423	189	323	303	383	388	393	253	317	227
	ENSMUSG00000003382.19	Etv3	0.190391	7.71613	3.75601	0.0586283	0.421149	1389	1527.98	573.95	1224.98	1077.98	1364.98	1348.94	1542.99	1572	1183	1161
	ENSMUSG00000003402.15	Prkcsh	-0.110902	5.30507	1.11504	0.296377	0.65677	314	326	124	275	269	281	236	307	259	231	203
	ENSMUSG00000003410.9	Elavl3	0.642858	-1.02929	0.611261	0.438228	0.793126	1	0	0	2	1	2	3	1	0	3	1
	ENSMUSG00000003411.11	Rab3b	0.570566	-0.256246	0.583333	0.44882	0.802933	2	2	0	2	0	1	2	4	0	2	1
	ENSMUSG00000003418.12	St8sia6	-0.525334	1.66298	3.61247	0.0634804	0.435346	32	16	6	13	20	36	11	21	17	15	6
	ENSMUSG00000003420.9	Fcgrt	-0.353017	5.5196	6.55601	0.0145573	0.242868	400	385	225	381	376	374	280	340	258	272	291
	ENSMUSG00000003421.14	Nosip	-0.110531	4.84173	0.989118	0.325043	0.689599	223	206	91	178	201	199	162	217	168	174	138
	ENSMUSG00000003423.16	Pih1d1	-0.189592	3.7118	1.64506	0.205911	0.617516	93	100	51.36	87	72	106	85	81.94	71	78.45	60.71
	ENSMUSG00000003429.12	Rps11	0.114757	7.6664	0.209431	0.652335	0.944317	1713.23	1724.98	163	694	734	1691.47	1223	1748.57	1079	1014.97	581.94
	ENSMUSG00000003435.10	Supt5	0.202087	6.67097	4.414	0.0410263	0.36778	731.73	722.33	302.95	586.48	638.48	693.23	705.51	830.31	728.57	611.54	656
	ENSMUSG00000003436.12	Dll3	0.178923	-1.47868	0.0234589	0.896562	1	0	0	0	0	0	1	0	0	1	0	0
	ENSMUSG00000003437.15	Paf1	0.192946	5.1432	2.08543	0.155333	0.595744	229	262	137	184	225	222	240	264	281	192	246
	ENSMUSG00000003438.18	Timm50	-0.351455	4.108	5.58131	0.0223377	0.293215	163	112	46	99	93	113	80	150	51	89	49
	ENSMUSG00000003444.9	Med29	-0.0672994	3.0623	0.183223	0.685874	0.954542	57	79	23	45	57	61	52	78	46	49	34
	ENSMUSG00000003452.16	Bicd1	0.497326	2.03277	4.02315	0.0506457	0.402599	30	31	6	11	16	37	22	36	33	35	23
	ENSMUSG00000003458.13	Ncstn	-0.0734977	6.72285	0.688752	0.410778	0.77138	840.1	772	275	637.61	658.06	894	646	885	585	596.55	502
	ENSMUSG00000003464.14	Pex19	0.0773033	5.58533	0.614222	0.437128	0.792141	378	344	122	288	298	323	289	383	300	292	268
	ENSMUSG00000003469.10	Phyhip	-0.0116625	4.79047	0.00694943	0.933916	1	86	75	41	80	67	82	78	103	62	82	42
	ENSMUSG00000003476.17	Crhr2	0.315644	3.03904	2.26199	0.139896	0.566829	93	64	19	24	30	63	65	92	45	66	32
	ENSMUSG00000003477.6	Inmt	0.250092	2.00738	0.79015	0.379432	0.74683	23	34	19	22	19	35	25	42	39	27	22
	ENSMUSG00000003484.5	Cyp4f18	-0.391037	3.43884	4.5429	0.0383056	0.358128	91	93	31	100	69	100	54	126	36	65	37
	ENSMUSG00000003500.14	Impdh1	-0.194512	4.26876	2.39832	0.128163	0.545423	192	168	73	115	119	172	115	131	128	137	97
	ENSMUSG00000003505.16	Psg18	-1.24075	-1.56459	1.54578	0.271182	0.628623	1	0	0	0	0	0	0	0	0	0	0
	ENSMUSG00000003518.14	Dusp3	-0.304692	6.12084	7.84643	0.00736587	0.182316	608	465	294	525	579	643	384	648	375	441	343.92
	ENSMUSG00000003526.13	Prodh	0.294171	3.73879	2.96555	0.0916208	0.486979	87	79	42	67	77	69	90	116	110	43	80
	ENSMUSG00000003527.10	Ess2	-0.192511	4.30856	2.18566	0.145961	0.579346	144	163	82	127	116	155	103	162	97	120	108
	ENSMUSG00000003528.16	Slc25a1	-0.334001	4.86975	8.28317	0.0059992	0.163935	233	202	105	172	208	231	141	239	153	165	92
	ENSMUSG00000003531.16	Dgcr6	0.212262	4.24891	2.23525	0.141569	0.570139	125	113	32	96	99	102	127	112	112	73	108
	ENSMUSG00000003534.18	Ddr1	0.131582	6.74842	1.6599	0.203913	0.617516	609	584	288	487	453	515	582	649	517	554	447
	ENSMUSG00000003541.7	Ier3	-0.0639128	4.68441	0.226062	0.636658	0.932644	157	218	70	131	135	145	130	205	118	165	82
	ENSMUSG00000003545.4	Fosb	1.02698	4.87591	3.06299	0.0960491	0.498098	64	133	38	347	309	130	128	245	144	589	582
	ENSMUSG00000003546.11	Klc4	0.28431	3.26204	1.73196	0.196976	0.617516	75	73	38	58	58	75	74	58	80	44	116
	ENSMUSG00000003549.10	Ercc1	-0.14715	3.70276	0.890953	0.350038	0.716804	79	96	38	67	75	76	90	93	52	57	40
	ENSMUSG00000003555.9	Cyp17a1	-0.110269	1.55478	0.0891496	0.766575	1	9	4	2	3	5	11	3	8	6	6	3
	ENSMUSG00000003559.9	As3mt	-0.089541	2.61849	0.1974	0.658863	0.946974	47	45	26	37	48	56	31	40	55	28	48
	ENSMUSG00000003573.16	Homer3	-0.152909	3.79801	0.810167	0.372652	0.740371	83.34	110.6	65.47	105.23	106.32	96.84	97.81	94.36	83.83	84.31	80.21
	ENSMUSG00000003575.14	Crtc1	-0.104409	4.78639	0.852761	0.360481	0.727955	213	238	63	155	150	223	165	207	146	165	113
	ENSMUSG00000003581.15	Rnf215	0.0400208	3.9652	0.0473166	0.829064	1	94	111	82	117	106	84	114	115	114	92	102
	ENSMUSG00000003585.14	Sec14l2	0.210819	3.13744	1.26988	0.2655	0.628623	46	46	27	36	38	39	53	60	37	44	36
	ENSMUSG00000003604.15	Aven	0.0785565	3.36667	0.283498	0.596922	0.904073	85	69.99	30	51	69.94	60.82	55	75.92	69.95	69.82	52.86
	ENSMUSG00000003617.17	Cp	-0.0306553	5.98791	0.0325737	0.858276	1	520	421	85	234	340	640	289	592	320	390	181
	ENSMUSG00000003623.5	Crot	-0.0892632	4.64585	0.408356	0.525902	0.857701	202	169	32	132	134	220	132	172	136	135	94
	ENSMUSG00000003644.18	Rps6ka1	-0.384597	5.83431	12.0269	0.00113111	0.0759928	470	423	193	387	416	448	314	450	219	340	213
	ENSMUSG00000003657.10	Calb2	-2.32836	-1.42453	3.60641	0.0642674	0.437633	1	0	0	0	0	2	0	0	0	0	0
	ENSMUSG00000003660.11	Snrnp200	-0.122351	7.58466	1.78142	0.188395	0.617516	1445	1411	564	1111	1356	1487	1081	1590	1020	1245	806
	ENSMUSG00000003662.11	Ciao1	-0.202061	4.40069	2.97325	0.0912131	0.485877	156	148	68	107	140	175	119	135	113	127	84
	ENSMUSG00000003665.8	Has1	0.399895	3.88454	7.13544	0.0103454	0.21134	100	106	52	72	84	85	95	156	102	115	96
	ENSMUSG00000003680.17	Taf6l	-0.312593	3.69721	4.27274	0.0442515	0.377561	107	112	52	91	80	85	77	88.14	71	55.26	68
	ENSMUSG00000003721.15	Insig2	0.0695019	5.37373	0.398697	0.530817	0.861146	282	254	58	198	232	295	204	318	198	224	180
	ENSMUSG00000003731.14	Kpna6	-0.0149938	6.48125	0.0262365	0.872017	1	719	549	187	465	457	650	479	690	483	503	322
	ENSMUSG00000003746.17	Man1a	0.0355646	6.7362	0.143849	0.706189	0.966672	890	717	299	575	624.74	991	708	929	631	715	501.99
	ENSMUSG00000003752.10	Itpkc	0.113181	5.84446	0.818654	0.370181	0.738	252.25	293.82	177.4	265.46	248.53	262.72	288.34	417.09	247.12	316.89	180.06
	ENSMUSG00000003762.14	Coq8b	0.00688991	4.55028	0.00225443	0.962331	1	163	167.03	104.94	148.95	174.89	130.56	162.75	191.5	155.91	150.92	122
	ENSMUSG00000003778.15	Brd8	0.175335	6.04786	2.95793	0.0920258	0.487772	482	410	155	331	383	508	381	406	484	393	403
	ENSMUSG00000003779.17	Kif20a	-0.0598376	4.55614	0.233356	0.631285	0.928528	170.25	194.57	48.18	133.91	173.96	183.13	149.2	185.69	114.6	150.53	112.11
	ENSMUSG00000003808.19	Farsa	0.111095	5.28239	1.0784	0.304361	0.666158	281	286	145	234	240	295	265	347	266	240	244
	ENSMUSG00000003809.15	Gcdh	0.0832993	3.47821	0.309988	0.580325	0.893805	68	77	22	63	67	79	60	84	72	58	55
	ENSMUSG00000003810.14	Mast2	-0.0103904	6.7329	0.0123659	0.911929	1	905	803	283	596	708	812	713	830	552	685	575
	ENSMUSG00000003812.14	Dnase2a	-0.506949	5.37974	15.63	0.00025742	0.0374958	207.61	210.55	132.03	214.13	238.11	244.12	162.3	217.69	119.76	172.95	98.26
	ENSMUSG00000003813.16	Rad23a	-0.135296	5.30336	1.33953	0.252955	0.628623	296.65	277.06	136.52	281.05	272.27	303.39	251.07	280.54	198.14	270.22	206.06
	ENSMUSG00000003814.9	Calr	-0.157353	8.81704	2.11931	0.152088	0.590817	3562	3750	1462	2582	3210	3495	2591	3298	2904	2459	2301
	ENSMUSG00000003824.13	Syce2	-0.272994	1.70884	1.00289	0.321731	0.686071	19	25	7	25	29	12	24	27	11	12	9
	ENSMUSG00000003847.17	Nfat5	0.0352768	8.23377	0.0809439	0.777494	1	2044	1697	408	1190	1267	2489	1211	2293	1357	1678	958
	ENSMUSG00000003848.15	Nob1	0.115764	4.64919	0.902096	0.347071	0.713129	204	172	79	135	161	158	168	194	171	153	140
	ENSMUSG00000003849.9	Nqo1	0.230516	2.62496	1.24108	0.270919	0.628623	53	42	9	28	19	58	32	66	37	43	23
	ENSMUSG00000003863.19	Ppfia3	0.269351	4.6269	3.01886	0.0888399	0.48092	61	69	33	43	35	56	74	77	54	63	36
	ENSMUSG00000003865.17	Gys1	0.146766	5.72764	0.946734	0.33833	0.70296	533.35	347.95	130.44	189.02	274.54	443.04	395.47	514.13	277.52	305.67	248.77
	ENSMUSG00000003868.15	Ruvbl2	0.071223	4.49668	0.283281	0.597062	0.904128	170.65	214.05	74.56	135.98	150.46	130.96	172.53	165.87	158.48	138.33	134.23
	ENSMUSG00000003872.10	Lin7b	1.30424	-0.139099	4.27473	0.0442041	0.377417	2	2	0	1	1	0	5	2	3.21	1	1.82
	ENSMUSG00000003873.12	Bax	-0.000862354	4.86593	1.10454e-05	0.997382	1	184	261.91	189	201.97	259	185	226	191	264	177	265
	ENSMUSG00000003882.6	Il7r	-0.341492	5.35253	2.61715	0.120809	0.534742	343	235	115	341	341	363	172	344	191	318	145
	ENSMUSG00000003923.15	Tfam	0.221914	4.42339	2.89853	0.0952555	0.496384	142	110	41	128	117	180	116	176	136	141	118
	ENSMUSG00000003929.12	Zfp81	0.0447195	3.52398	0.0737373	0.787158	1	76	61	13	40	54	99	47	85	54	62	39
	ENSMUSG00000003934.6	Efnb3	0.0634843	0.559554	0.0242769	0.876849	1	15	10	1	6	9	8	13	15	4	2	8
	ENSMUSG00000003948.18	Mmd	0.00973917	4.50944	0.00422596	0.948443	1	125.93	96.54	21.18	76.13	86.52	135.94	70.65	128.25	100.17	79.25	64.85
	ENSMUSG00000003949.17	Hlf	0.316968	6.09669	2.41756	0.135285	0.558526	406	288	58	251	208	430	317	443	298	371	202
	ENSMUSG00000003955.9	Fam162a	0.284145	4.30452	3.86357	0.0552595	0.416063	94	87	52	66	83	101	106	117	86	110	80
	ENSMUSG00000003970.10	Rpl8	0.14355	8.65339	1.71658	0.19649	0.617516	2709	2454	1284	2364	2452	2369	2667	3005	2331	2388	2453
	ENSMUSG00000003974.7	Grm3	1.3889	-1.62443	1.91574	0.208944	0.617516	0	0	0	0	0	0	0	1	0	0	0
	ENSMUSG00000003992.16	Ssbp2	0.341902	4.90802	5.97622	0.0182981	0.269702	195.68	169.88	25.54	129.96	106.33	212.19	155.33	198.15	191.87	164.03	130.58
	ENSMUSG00000004018.10	Fancl	-0.621827	2.42153	8.90886	0.00449	0.145803	40.15	41.13	8.55	32.53	30.33	45.75	25.68	30.11	14.57	18.37	16.71
	ENSMUSG00000004031.14	Brinp2	0.551804	-1.07092	0.350728	0.556535	0.87813	0	2	0	0	0	3	1	0	1	2	2
	ENSMUSG00000004032.11	Gstm5	0.0464161	3.43071	0.0790753	0.779787	1	65	60	36	42	59	78	56.96	99	46	68	34
	ENSMUSG00000004035.13	Gstm7	0.466033	-0.0690416	1.03604	0.313946	0.677089	8	3	2	2	3	4	4	6	5	2	8
	ENSMUSG00000004038.10	Gstm3	0	-1.53248	0	1	1	0	0	0	0	0	0	0	0	0	0	0
	ENSMUSG00000004040.17	Stat3	0.0522844	8.4328	0.293207	0.590727	0.900045	2703	2869	829	2110	2202	2557	2191	3385	2052	2277	1585
	ENSMUSG00000004043.15	Stat5a	-0.147912	5.99579	1.93009	0.171285	0.617516	529.37	496.83	214.54	367.29	461.36	424.34	398.1	524.69	329.85	385.24	284.01
	ENSMUSG00000004044.10	Cavin1	0.057708	8.50329	0.238794	0.627432	0.925898	2939	2762	1565	2360	2494	2520	2727	2714	2566	2379	2647
	ENSMUSG00000004054.10	Map3k11	-0.207532	6.28602	1.40786	0.247676	0.628623	509.47	573.98	423	570	542	477.47	513	525	528	383	449
	ENSMUSG00000004056.16	Akt2	0.15173	6.86143	2.29165	0.136757	0.561285	1027.34	992.98	269.35	659.39	605.57	769.37	829.13	909.36	741.24	732.48	676.07
	ENSMUSG00000004069.18	Dnaja3	0.148541	5.17126	1.83471	0.182038	0.617516	268	220	106	195	192	290	264	277.05	227	211	193
	ENSMUSG00000004070.16	Hmox2	0.0223703	5.62451	0.0243276	0.87699	1	355.13	388.6	174.45	372.23	391.51	336.37	332.09	311.28	386.46	280.27	390.96
	ENSMUSG00000004071.14	Cdip1	0.0220622	5.84015	0.0503844	0.823367	1	466.97	416.62	136.89	285.77	341.81	469.69	347.91	502.72	295.54	374.84	257.04
	ENSMUSG00000004085.15	Map3k20	0.20663	8.11385	3.38772	0.0719915	0.449283	2461	1405	498	1217	1359	2318	1475	2432	1431	1914	1346
	ENSMUSG00000004096.10	Cwc15	0.0969864	4.76929	0.619187	0.435293	0.790657	238	221	49	162	175	233	196	233	207	164	132
	ENSMUSG00000004098.8	Col5a3	-0.282867	5.77087	5.03093	0.0298569	0.327521	507	476	262	405	448	441	423	331	311	326	368
	ENSMUSG00000004099.17	Dnmt1	0.0347318	7.0231	0.130432	0.7196	0.975182	972	1102	375	705	819	889	785	955	816	840	730
	ENSMUSG00000004100.13	Ppan	0.190787	4.72563	2.39381	0.128513	0.546042	184	174	50	125	127	173	161	239	139	159	95
	ENSMUSG00000004105.9	Angptl2	-0.172838	6.8683	1.99047	0.165789	0.61717	1223	1035	318	694	761	1241	828	969	569	880	547
	ENSMUSG00000004110.18	Cacna1e	0.289832	3.79201	3.52915	0.0664988	0.444698	89	79	30	56	83	105	107	107	69	93	69
	ENSMUSG00000004113.19	Cacna1b	-0.31106	0.658951	0.860713	0.358272	0.725627	10	17	7	15	6	9	9	11	11	8	5
	ENSMUSG00000004127.13	Trmt10a	0.078402	2.79419	0.126857	0.723304	0.978043	24	38	3	17	27	30	17	35	22	27	19
	ENSMUSG00000004151.18	Etv1	0.00208144	3.33557	0.000115622	0.991466	1	83.27	78.45	12	50.77	39.74	115.74	55	89.7	55.58	69.46	36
	ENSMUSG00000004187.12	Kifc2	-0.0857286	1.65685	0.0979077	0.848869	1	24.17	15	13	9	14	13	12	20	13.16	14	12
	ENSMUSG00000004207.15	Psap	-0.372872	10.5695	6.61063	0.015247	0.247689	11128	14342	7756	13774	14467	12066	9750	11925	10389	8359	9353
	ENSMUSG00000004221.17	Ikbkg	0.163465	5.80899	2.48161	0.121881	0.536279	402.32	354	147	312	331.94	416	325	403.39	411.44	341	330.73
	ENSMUSG00000004231.16	Pax2	0	-1.59372	0	1	1	0	0	0	0	0	0	0	0	0	0	0
	ENSMUSG00000004233.15	Wars2	-0.0427314	3.0518	0.0556138	0.814591	1	72	55	29	29	43	61	39	79	36	52	33
	ENSMUSG00000004263.16	Atn1	-0.0468071	6.299	0.182128	0.671496	0.947176	668.1	657	254	429	414	573	600	639	381	488	336
	ENSMUSG00000004264.18	Phb2	-0.0389075	6.42705	0.128535	0.721558	0.9767	579.47	682.85	293.22	495.18	582.46	510.91	540.85	643.65	466.27	526.63	441.55
	ENSMUSG00000004266.16	Ptpn6	-0.268262	6.54515	3.40971	0.0750851	0.449283	735.83	943.69	284.88	694.16	685.72	768.5	538.53	819.16	623.39	463.88	427.66
	ENSMUSG00000004267.17	Eno2	0.102937	2.39902	0.253237	0.617151	0.919256	44	41	21	31	29	31	51	39	28	29	31
	ENSMUSG00000004268.12	Emg1	0.0511857	5.54918	0.213425	0.646224	0.939924	323.6	327.3	150	293.55	334.28	312.05	308.36	359.21	301.45	317.48	243.65
	ENSMUSG00000004270.14	Lpcat3	-0.276747	5.37554	4.78398	0.0337273	0.341928	317.4	339.7	81	247.45	281.72	359.95	233.64	380.79	162.55	217.52	127.35
	ENSMUSG00000004285.13	Atp6v1f	-0.219656	5.06692	3.61641	0.0633416	0.435058	217	250	127	218	216	240	194	257	167	194	133
	ENSMUSG00000004296.15	Il12b	0.188141	-0.407842	0.119165	0.731479	0.983218	3	3	1	3	5	6	2	5	4	7	2
	ENSMUSG00000004317.15	Clcn5	-0.000432368	5.56798	1.8506e-05	0.996586	1	341	352	114	234	287	370	260	375	268	262	235
	ENSMUSG00000004319.16	Clcn3	0.254006	6.43478	5.88916	0.0191161	0.275664	506	483	156	350	376	571	416	518	584	402	428
	ENSMUSG00000004328.16	Hif3a	0.0542376	0.862304	0.0226109	0.881116	1	15	7	1	9	14	21	9	27	6	7	9
	ENSMUSG00000004347.18	Pde1c	0.442791	1.73969	2.81797	0.0998412	0.507157	21	15	5	10	15	23	18	13	27	20	19
	ENSMUSG00000004356.9	Utp20	0.227576	6.0154	5.05799	0.0292307	0.326498	432	406	111	328	354	458	386	560	368	398	295
	ENSMUSG00000004359.17	Spic	-0.842149	0.90596	5.5797	0.0223559	0.29328	18	18	3	9	12	21	4	14	5	10	4
	ENSMUSG00000004360.10	9330159F19Rik	0.128696	2.95429	0.143303	0.708815	0.968388	56	29	7	26	41	92	37	70	42	33	38
	ENSMUSG00000004364.15	Cul3	0.188002	6.6465	2.11697	0.154077	0.593413	669	512	106	393	438	791	434	796	517	561	343
	ENSMUSG00000004371.16	Il11	-0.417212	-0.371935	0.533888	0.468598	0.81057	3	5	0	4	4	4	0	1	3	6	2
	ENSMUSG00000004383.19	Large1	-0.072831	5.02076	0.37453	0.54349	0.870187	258	212	118	181	198	242	185	237	157	241	157
	ENSMUSG00000004393.11	Ddx56	-0.0931171	4.78971	0.494574	0.485358	0.824233	164	241	88	154	186	180	158	220	148	167	118
	ENSMUSG00000004394.13	Tmed4	0.212025	4.99843	2.19088	0.146526	0.580494	221	193	141	208	212	231	233	287	253	162	267
	ENSMUSG00000004415.16	Col26a1	-0.957309	-0.7183	1.80654	0.185366	0.617516	5	4	0	6	2	3	0	1	0	4	3
	ENSMUSG00000004446.13	Bid	-0.351833	4.41934	5.30447	0.0259262	0.31474	173	183	52	162	189	185.7	120	194.61	87	151	72
	ENSMUSG00000004451.15	Ralb	-0.113558	5.84392	1.32181	0.256075	0.628623	466	466	169	466	381	481	394	538	344	322	292
	ENSMUSG00000004455.17	Ppp1cc	0.205713	6.88298	4.95786	0.0307939	0.33027	809.36	798.79	318.74	596.3	671.95	864.22	693.19	873.27	889.41	702.57	705.45
	ENSMUSG00000004460.18	Dnajb11	0.254264	6.02987	2.32724	0.140052	0.567102	510	668	226	360	391	484	502	440	774	372	483
	ENSMUSG00000004462.8	Tbccd1	-0.277665	4.03431	3.17347	0.0812948	0.462994	110	86	54	103	106	120	70	148	61	94	46
	ENSMUSG00000004473.11	Clec11a	-0.356533	3.14592	3.82151	0.056551	0.416063	103	85	34	47	58	93	54	44	45	56	64
	ENSMUSG00000004500.10	Zfp324	-0.323902	3.96017	5.03926	0.0295165	0.326498	126	80	44	78	89	116	68	124	59	69	44
	ENSMUSG00000004508.7	Gab2	0.0871073	6.13469	0.743492	0.392916	0.759681	686	682	229	502	495	623	537	620	593	530	514
	ENSMUSG00000004530.13	Coro1c	0.0573129	7.7404	0.343877	0.560401	0.880818	1697	1924.17	692.55	1445	1366.56	1613	1515.92	1760	1644.65	1210.99	1418.95
	ENSMUSG00000004535.13	Tax1bp1	0.0721349	8.00211	0.295503	0.590308	0.899763	1940.99	1662	365	1367	1330	2007.95	1169	2172	1614	1527	901
	ENSMUSG00000004540.8	Psg17	0.479055	-1.20195	0.357381	0.552829	0.875975	2	3	0	0	0	1	1	2	1	2	1
	ENSMUSG00000004542.16	Psg19	-0.473276	-1.50664	0.18387	0.670373	0.946974	2	0	0	0	0	0	0	0	1	0	0
	ENSMUSG00000004552.17	Ctse	-0.0954345	1.40459	0.0938131	0.760735	1	34	24	3	13	26	17	14	21	10	33	11
	ENSMUSG00000004558.16	Ndrg2	0.675664	7.22534	11.3302	0.00307031	0.123174	1418	813	271	469	621	1312	1275	1490	1237	906	1192
	ENSMUSG00000004561.15	Mettl17	-0.257834	3.53793	2.8457	0.0982354	0.503776	92	76	29.22	71	78	77	66	76	64	64	28
	ENSMUSG00000004562.17	Arhgef40	0.00276781	5.42262	0.000634785	0.980006	1	374	369	165	291	291.18	300	332.34	360.08	265	325.87	240.1
	ENSMUSG00000004565.16	Pnpla6	-0.0359333	4.94472	0.116761	0.734095	0.985073	223	216	76	182	163	220	162	235	158	173	148
	ENSMUSG00000004567.17	Mcoln1	-0.0246421	5.39914	0.0427619	0.837066	1	295	314	150	224	249	310	333	355	223	198	190
	ENSMUSG00000004568.14	Arhgef18	-0.21621	5.9241	4.91611	0.0314722	0.333348	462	366	169	321	336	461	316	446	278	300	203
	ENSMUSG00000004591.17	Pkn2	0.120375	6.53909	1.57969	0.215006	0.625903	670	654	191	487	466	762	436	797	624	560	454
	ENSMUSG00000004609.12	Cd33	-0.0913757	3.94771	0.307944	0.581572	0.894509	153	112	35	63	106	166	105	147	87	108	44
	ENSMUSG00000004610.5	Etfb	0.208973	5.00855	2.14634	0.150624	0.587695	254	252	113	229	234.26	215	254	234	271.23	205	277.28
	ENSMUSG00000004612.10	Nkg7	-1.21662	4.10948	17.6568	0.000446737	0.0507205	150	180	114	169	205	196	77	138	39	105	35
	ENSMUSG00000004626.15	Stxbp2	-0.0841599	5.54005	0.514595	0.476701	0.817057	352	387	172	264	320	326	290	323	335	218	278
	ENSMUSG00000004630.19	Pcp2	0.121151	-0.470011	0.0186119	0.892331	1	6.37	4.37	0	0	1.25	0	3.22	1.48	2.69	1.42	1.69
	ENSMUSG00000004631.16	Sgce	0.0955086	3.76363	0.372598	0.544527	0.871055	104	117	26	80	78	122	80	104	89	88	91
	ENSMUSG00000004633.18	Chn2	-0.339571	2.6424	2.98643	0.0905202	0.484717	61.93	43	14	36.73	45.59	51.72	37	48.15	20	30.42	29.13
	ENSMUSG00000004637.16	Wwox	0.0500977	3.81046	0.122768	0.727615	0.980953	115	75	36	62	102	120	96	120	75	83	65
	ENSMUSG00000004642.14	Slbp	-0.0568347	4.74777	0.220328	0.640957	0.935897	167	186.91	77	172.84	147.78	227.79	145	232.97	149	158.63	112.95
	ENSMUSG00000004651.7	Tyr	1.02963	-0.357888	3.40619	0.0712465	0.449283	2	1	0	4	1	3	5	3	2	6	3
	ENSMUSG00000004654.7	Ghrhr	1.41834	-1.59371	1.93366	0.208944	0.617516	0	0	0	0	0	0	1	0	0	0	0
	ENSMUSG00000004655.6	Aqp1	0.209691	7.60373	4.52721	0.0386259	0.359475	1717	1619	658	1145	1260	1604	1645	1632	1554	1318	1465
	ENSMUSG00000004661.16	Arid3b	-0.314184	3.84423	4.32257	0.0430833	0.374629	138	156	41	121	94	139	89	112	93	84	76
	ENSMUSG00000004665.11	Cnn2	-0.0957616	6.3915	0.787809	0.379276	0.746788	672	755	300	557	611	649	590	621	553	493	514
	ENSMUSG00000004667.19	Polr2e	-0.0168899	4.59008	0.0185523	0.892239	1	197	209	62	130	114	171	169	183	161	122	88
	ENSMUSG00000004668.15	Abca13	-1.15789	1.66076	5.86523	0.0246705	0.308296	55	21	13	18	54	41	11	21	6	36	2
	ENSMUSG00000004677.18	Myo9b	-0.25435	7.54149	6.91684	0.0115012	0.221479	1493	1544	714	1371	1390	1500	1205	1558	1019	1170	841
	ENSMUSG00000004698.12	Hdac9	-0.324276	3.44117	3.78822	0.0575965	0.418683	102	81	23	82	64	128	49	107	50	60	50
	ENSMUSG00000004707.15	Ly9	-0.51384	4.46062	12.8472	0.000799703	0.0658511	201	194	74	196	195	204	117	193	108	111	102
	ENSMUSG00000004709.15	Cd244a	-0.107738	4.64537	0.628941	0.431723	0.787878	223	224	59	149	170	213	134	217	168	157	116
	ENSMUSG00000004730.16	Adgre1	-0.287239	6.74432	4.42393	0.0433645	0.374657	884	973	309	870	867	1124	627	1055	700	519	540
	ENSMUSG00000004748.6	Mtfp1	0.0528756	0.481626	0.0165294	0.898248	1	9	9	5	5	10	8	5	5	12	4	13
	ENSMUSG00000004768.15	Rab23	-0.0476187	4.51518	0.133851	0.716111	0.97287	205	172	54	164	138	163	146	202	123	154	98
	ENSMUSG00000004771.13	Rab11a	0.185587	6.53287	3.8182	0.0566538	0.416063	553	478	149	418	435.08	631	436	652	562	432	388.22
	ENSMUSG00000004788.12	Eif2b2	0.224103	4.62216	2.99176	0.0902413	0.484047	165	203	74	160	150	152	183	186	177	138	190
	ENSMUSG00000004789.11	Dlst	0.115487	6.86315	1.72434	0.1955	0.617516	894	943	323	672	680	906	768	972	839	679	690
	ENSMUSG00000004791.8	Pgf	-0.108009	1.47475	0.148393	0.701811	0.963633	25	24	10	14	10	24	15	18	25	12	12
	ENSMUSG00000004798.15	Ulk2	-0.0824936	5.43221	0.504025	0.481239	0.820709	367	259	97	233	238	386	202	395	217	267	162
	ENSMUSG00000004814.11	Ccl24	0.840393	-0.296472	1.4801	0.230712	0.628623	5	1	0	2	0	5	3	4	0	6	6
	ENSMUSG00000004815.13	Dgkq	-0.121442	5.26643	1.20023	0.278849	0.63763	232.28	240.86	121	211.77	243.06	235.94	199.38	264.36	187.7	206.27	157.11
	ENSMUSG00000004837.3	Grap	-0.0997889	2.9026	0.284762	0.596107	0.903769	43	49	31	42	55	48	39	62	40	33	42
	ENSMUSG00000004842.19	Pou1f1	1.97392	-1.06935	3.16451	0.0817121	0.463771	0	0	0	0	1	0	2	0	0	3	0
	ENSMUSG00000004843.8	Chmp2b	0.100832	5.51864	0.711552	0.403195	0.765507	275	222	53	194	187	296	181	306	218	235	133
	ENSMUSG00000004846.11	Plod3	-0.121258	6.4894	0.86871	0.357512	0.724839	766	876.43	337.82	635.73	644.89	637.06	686.76	766.11	595.9	544.84	456.71
	ENSMUSG00000004849.15	Ap1s1	-0.141047	5.24209	1.25124	0.26899	0.628623	263	330	144	264	256	261	234	299	202	207	231
	ENSMUSG00000004864.14	Mapk13	-0.047242	5.38584	0.117866	0.732889	0.984181	106	130	56	110	96	99	110	151	74	97	67
	ENSMUSG00000004865.17	Srpk1	0.226765	7.23031	5.951	0.0185311	0.271242	595	590	190	445	486	685	562	856	601	508	387
	ENSMUSG00000004872.16	Pax3	0.671983	-0.49126	0.886752	0.351937	0.718739	7	3	0	0	2	2	5	3	6	0	4
	ENSMUSG00000004880.12	Lbr	0.0389856	6.09573	0.161351	0.689733	0.956669	530.86	460.53	130.12	371.38	360.86	555.7	336	568.27	396.08	426.07	296.72
	ENSMUSG00000004885.6	Crabp2	0.584872	4.47757	9.15365	0.00496691	0.150567	57	83	38	47	69	74	100	109	102	45	105
	ENSMUSG00000004891.17	Nes	0.0445867	5.56801	0.0355856	0.852322	1	473	335	234	411	385	324	368	265	371	396	467
	ENSMUSG00000004892.14	Bcan	-0.828234	-0.397497	1.92219	0.172147	0.617516	7	7	1	1	2	5	1	1	1	3	4
	ENSMUSG00000004894.11	Hapln2	-0.767737	-1.089	0.76288	0.386862	0.753141	1	2	3	1	1	0	0	1	2	1	0
	ENSMUSG00000004895.10	Prcc	0.0155887	5.22464	0.0193465	0.889971	1	314	322	129	242	233	238	257	260	253	241	234
	ENSMUSG00000004896.17	Rrnad1	0.335474	4.53542	5.96029	0.0184449	0.270787	126.7	145.3	50.91	125.12	132.41	131.79	157.16	186.59	191.53	98.54	118.03
	ENSMUSG00000004897.17	Hdgf	0.222223	7.73828	4.07467	0.0492476	0.397316	1498	1653	689	1092	1194	1309	1556	1410	1523	1247	1472
	ENSMUSG00000004902.8	Slc25a18	0.124639	1.51782	0.169167	0.68272	0.952876	11	17	13	11	17	17	13	25	16	17	11
	ENSMUSG00000004929.13	Thop1	-0.0347438	5.45502	0.0678375	0.795648	1	203	183	86	125	178	165	171	265	108	154	98
	ENSMUSG00000004931.12	Apba3	-0.0865064	4.66571	0.500251	0.482876	0.821968	178	167	70	130	149	170	160	203	121	121	87
	ENSMUSG00000004933.18	Matk	-0.253918	2.11616	1.3877	0.244715	0.628623	30	34	22	29	33	36	37	31	22	21	21
	ENSMUSG00000004934.15	Pias4	-0.192966	4.75787	1.9405	0.170158	0.617516	226	198	126	174	189	161	184	225	150	132	133
	ENSMUSG00000004936.9	Map2k1	-0.00663959	5.93807	0.00323488	0.954885	1	458	478	254	393	393	423	399	479	411	381	380
	ENSMUSG00000004937.7	Sgta	0.0451448	5.85569	0.200484	0.656384	0.946345	453	431	165	316	340	393	406	504	314	302	293
	ENSMUSG00000004939.8	Nmrk2	0.13571	2.77632	0.476273	0.493504	0.830742	69	48.64	13	38	47	69	38	46.51	49	52.57	61
	ENSMUSG00000004945.16	Tmem242	0.0807342	4.67647	0.252786	0.618254	0.919824	158	192	117	158	184	150	159	195	193	169	166
	ENSMUSG00000004947.16	Dtx2	0.0856484	5.69795	0.596342	0.443837	0.798143	343	381	143	298	235	319	341	430	310	222	241
	ENSMUSG00000004948.13	Zp3	1.41834	-1.62384	1.8983	0.208944	0.617516	0	0	0	0	0	0	1	0	0	0	0
	ENSMUSG00000004951.11	Hspb1	-0.401388	7.97949	3.17184	0.0905357	0.484717	1463.88	1055.18	658.58	1341.9	1271.97	1235	901.52	1461.45	463.86	1437.51	484.71
	ENSMUSG00000004952.14	Rasa4	-0.0976862	6.55019	0.732101	0.396537	0.761599	759	833	426	762	757	785	703	809.9	718	630	609
	ENSMUSG00000004961.8	Syt5	-0.667017	-1.201	0.508868	0.479567	0.8197	1	2	1	1	0	1	0	1	0	2	0
	ENSMUSG00000004980.17	Hnrnpa2b1	0.238102	8.24899	4.89138	0.0318816	0.335291	2189	2384	1014	1849	1946	2422	2027	2365	2786	2067	2294
	ENSMUSG00000004988.10	Fxyd4	-0.332033	0.285475	0.503854	0.481313	0.820724	6	10	0	7	10	2	3	7	6	3	4
	ENSMUSG00000004994.13	Ccdc130	-0.252084	2.9213	1.88475	0.1763	0.617516	53	54	22	54	59	46	41	60	43	32	30
	ENSMUSG00000004996.10	Mri1	-0.0118465	4.17268	0.00518194	0.942931	1	100	98	79	84	105	102	111	126	78	113	70
	ENSMUSG00000005034.16	Prkacb	-0.149869	6.23184	2.25066	0.140234	0.567116	557	511	239	457	491	711	404	620	358	496	373
	ENSMUSG00000005043.14	Sgsh	-0.0209664	4.24166	0.0238592	0.877904	1	157.58	139.84	53.84	112.99	104.31	148.38	140.88	160.64	80.49	142.34	69.36
	ENSMUSG00000005045.17	Chd5	-0.0196503	1.06634	0.00429707	0.948012	1	25	17	3	12	8	16	15	14	12	10	13
	ENSMUSG00000005054.8	Cstb	-0.337305	5.62258	5.89789	0.0200447	0.280898	403	320	101	261	287	486	227	406	212	263	117
	ENSMUSG00000005057.14	Sh2b2	-0.345129	4.35966	6.88591	0.0116756	0.222932	168	196	92	154	160	168	127	196	108	120	91
	ENSMUSG00000005069.13	Pex5	0.054328	5.3398	0.18119	0.672292	0.947465	270	292	177	282	284	280	283	314	283	265	275
	ENSMUSG00000005078.17	Jkamp	-0.00819902	3.69411	0.00261537	0.95943	1	102	84	13	60	56	107	69	90	79	58	41
	ENSMUSG00000005087.18	Cd44	0.244391	8.72971	4.71378	0.0349961	0.34541	3040	2996	613	2073	2102	3632	2590	3598	2740	2745	1923
	ENSMUSG00000005089.16	Slc1a2	0.212819	1.11294	0.369272	0.546321	0.872177	24	10	2	9	11	10	6	18	18	14	7
	ENSMUSG00000005102.14	Eif2ak4	0.0927697	4.36852	0.650295	0.424062	0.781177	160	150	61	118	116	168	138	167	129	152	101
	ENSMUSG00000005103.13	Wdr1	-0.0826123	8.24315	0.726848	0.398223	0.761599	2457	2636	788	1969	2097	2510	1956	2474	1869	1872	1512
	ENSMUSG00000005107.14	Slc2a9	-0.17439	3.10444	1.04751	0.311312	0.674053	70	75	22	49	94	72	68	71	47	48	46
	ENSMUSG00000005124.11	Ccn4	-0.521136	3.70667	8.07372	0.00689314	0.176618	188	111	39	62	82	125	54	77	46	101	62
	ENSMUSG00000005125.14	Ndrg1	-0.0645411	6.83848	0.473921	0.494567	0.831523	972	862	408	715.99	731	791	725	1064	667	684	554
	ENSMUSG00000005131.5	4930550C14Rik	-0.346053	0.425473	0.531621	0.469538	0.811443	6	3	0	6	5	7	3	3	3	2	6
	ENSMUSG00000005142.11	Man2b1	-0.334562	7.0081	11.7344	0.00128188	0.0813429	978	1061	470	950	1026	1072	738	1092	720	665	579
	ENSMUSG00000005148.9	Klf5	0.354332	7.13485	10.8757	0.00185975	0.0963708	718	585	257	423	401	680	626	706	696	663	536
	ENSMUSG00000005150.17	Wdr83	-0.0866577	3.67622	0.375931	0.54274	0.870129	97.69	92.53	46.19	75.42	79.41	90.25	70.33	87.78	77.44	80.44	66.06
	ENSMUSG00000005161.16	Prdx2	-0.291605	6.54626	6.7073	0.0127389	0.230109	611.99	528.97	271.99	488.93	577.98	553.92	420.81	573.93	343.99	549	258.86
	ENSMUSG00000005198.16	Polr2a	0.0955585	7.67824	1.26423	0.266553	0.628623	1730	1678	598	1259	1231	1613	1430	1964	1300	1383	1154
	ENSMUSG00000005204.13	Senp3	0.121911	5.72838	1.31856	0.256651	0.628623	397	443	160	288	328	319	366	405	373.04	308.98	304.94
	ENSMUSG00000005220.11	Corin	-0.57433	0.103867	1.38959	0.244399	0.628623	3	9	2	2	4	5	1	6	3	3	1
	ENSMUSG00000005225.16	Plekha8	0.254697	4.03495	3.85553	0.0555039	0.416063	111.58	98.02	38.13	70.53	82.65	109.81	96	125.74	95	96.71	89.71
	ENSMUSG00000005233.17	Spc25	-0.14899	2.88599	0.694039	0.409001	0.769954	58	41	19	33	47	56	29	40	43	48	29
	ENSMUSG00000005237.15	Dnah2	-0.0868144	1.65795	0.136706	0.713236	0.971199	22	30	9	18	22.78	34	18	26	25	25	12
	ENSMUSG00000005251.16	Ripk4	0.291757	5.27074	5.63205	0.021769	0.290927	202	200	77	166	150	176	205	179	243	169	180
	ENSMUSG00000005262.14	Ufd1	0.160526	5.51354	2.33278	0.133367	0.55478	310	378	109	245	262	300	326	317	297	260	264
	ENSMUSG00000005267.14	Zfp287	-0.121751	3.43609	0.549919	0.462034	0.805614	90	85	28	85	72	102	76	91	76	53	55
	ENSMUSG00000005268.21	Prlr	0.395908	5.30903	3.63346	0.0698442	0.449283	177	127	21	109	99	252	137	230	143	208	104
	ENSMUSG00000005299.7	Letm1	0.0745679	5.99132	0.43216	0.514132	0.847443	389	460	228	387	374	439	416	471	412	353	390
	ENSMUSG00000005312.16	Ubqln1	-0.0532451	6.94057	0.340791	0.562159	0.881824	703	724	256	572	570	778	551	866	504	611	396
	ENSMUSG00000005320.10	Fgfr4	-0.499542	0.757676	1.5239	0.223421	0.628623	14	17	11	10	11	8	12	8	1	15	7
	ENSMUSG00000005338.15	Cadm3	0.518934	6.0051	12.6841	0.00124351	0.0801608	618.08	575.55	139	214	291.95	460.85	585.65	591.5	601	452.64	392
	ENSMUSG00000005339.11	Fcer1a	1.08702	0.809205	6.69954	0.0127873	0.230109	10	4	1	1	4	6	7	26	8	5	2
	ENSMUSG00000005354.17	Txn2	-0.0559088	5.77259	0.302954	0.584639	0.896641	401	377	158	291	329	397	361	414	263	328	219
	ENSMUSG00000005355.10	Casp14	0.709807	5.19276	9.10466	0.00573012	0.160457	46	39	10	24	16	51	59	90	42	39	24
	ENSMUSG00000005357.10	Slc1a6	-3.39862	-1.34746	7.42306	0.00967102	0.205181	3	0	0	1	2	1	0	0	0	0	0
	ENSMUSG00000005360.15	Slc1a3	-0.0256527	4.31384	0.0420924	0.838328	1	136	150	35	92	108	139	96	161	98	89	89
	ENSMUSG00000005362.15	Crbn	0.274947	5.10529	5.06112	0.0291832	0.326498	250	247	53	141	191.59	302.56	196.6	281.54	277.64	214	175
	ENSMUSG00000005364.12	Il5ra	0.363299	-0.286487	0.315025	0.577275	0.891341	1	3	0	1	4	3	4	4	3	1	1
	ENSMUSG00000005370.5	Msh6	0.0550815	5.41821	0.266152	0.608339	0.912878	301	244	144	231	259	305	265	327	244	277	204
	ENSMUSG00000005371.16	Fbxo11	0.174727	5.96449	2.6293	0.111587	0.532525	423	387	93	275	290	499	294	507	367	364	262
	ENSMUSG00000005373.14	Mlxipl	0.216014	3.17871	0.980961	0.328331	0.692855	71	48.22	30	24	42.13	82	68	90	42.96	38	50.22
	ENSMUSG00000005374.14	Tbl2	0.0358755	5.07058	0.111292	0.740159	0.989294	267	274	84	162	225	268	211	249	220	183	203
	ENSMUSG00000005378.18	Bud23	0.00675905	3.99345	0.00222141	0.962608	1	116.52	124.18	58.01	92.07	91.45	115.03	98	132.68	101.89	103.31	75
	ENSMUSG00000005397.9	Nid1	-0.201769	7.53808	4.64317	0.0363245	0.350264	1958.88	2015.55	507.06	1281.71	1241.35	1779.99	1197.16	1700	1139.6	1249.12	937.13
	ENSMUSG00000005410.7	Mcm5	0.0327396	5.49055	0.0863023	0.770223	1	379	390	142	290	308	361	304	342	331	295	301
	ENSMUSG00000005413.9	Hmox1	-0.418117	6.76538	6.99548	0.0138734	0.238523	849	1146	365	657	798	879	673	1005	418	623	318
	ENSMUSG00000005417.18	Mprip	0.121718	8.34326	1.78261	0.18825	0.617516	2311.78	2339.2	948.19	1701.98	1775.9	2019.03	2043.13	2484.37	1938.6	1875.7	1803.13
	ENSMUSG00000005442.14	Cic	-0.0919705	8.03331	0.898129	0.348123	0.714359	2185	2331	1009	1784	1711	1978	1970	2112	1615	1582	1486
	ENSMUSG00000005447.13	Pafah1b3	0.072445	2.83705	0.180324	0.673029	0.947772	44	52	16	44	36	50	45	48	41	40	36
	ENSMUSG00000005465.10	Il27ra	-0.894323	2.02794	12.4035	0.000963937	0.0710996	34	33	14	37	34	31	13	26	17	19	9
	ENSMUSG00000005469.11	Prkaca	-0.218356	5.75261	3.94619	0.0528159	0.410992	487	404	141	270	332	422	329	452	216	296	187
	ENSMUSG00000005470.9	Asf1b	-0.297797	3.32102	2.81281	0.100143	0.508086	96	76	27	52	54	100	65	80	40	65	24
	ENSMUSG00000005474.10	Myl10	0.277544	-0.477285	0.198169	0.658243	0.946974	6	1	2	0	3	3	3	3	3	1	5
	ENSMUSG00000005481.19	Ddx39a	0.117558	5.44526	1.07796	0.304458	0.666245	283.42	331.88	116.63	281.71	293.93	316.52	312.96	323.39	300.75	257.23	263.3
	ENSMUSG00000005483.11	Dnajb1	0.135007	5.67856	1.53631	0.221312	0.628623	362	309	94	200	218	283	272	371	269	226	190
	ENSMUSG00000005493.16	Msh4	0.446378	-0.28527	0.597736	0.443308	0.797674	5	1	1	4	0	2	2	4	4	3	2
	ENSMUSG00000005501.15	Usp40	0.0427376	5.60345	0.130893	0.719127	0.975084	337	279	66	251	248	400	225	401	243	292	168
	ENSMUSG00000005503.9	Evx1	-0.810619	-1.27181	0.665797	0.41863	0.777139	3	1	0	1	0	0	0	0	0	0	2
	ENSMUSG00000005505.13	Kbtbd4	0.128753	4.18813	0.834964	0.365497	0.733333	117.85	145.26	48	87.18	99.66	92.15	99.04	123.48	120.29	89.15	103.78
	ENSMUSG00000005506.17	Celf1	0.143363	7.32681	2.64911	0.110283	0.532525	1195	1266	377	963	949	1306	977	1334	1130	1079	933
	ENSMUSG00000005510.10	Ndufs3	-0.0385669	5.1761	0.111666	0.739739	0.989182	308.78	216.42	108.1	201.29	257.47	244.67	236.2	308.81	216.23	166.05	174.03
	ENSMUSG00000005514.15	Por	-0.339033	6.3889	8.76531	0.00479659	0.148467	697	835	411	618	638	635	534	666	505	475	455
	ENSMUSG00000005533.11	Igf1r	0.247109	7.25311	7.92841	0.00708613	0.178804	1178	1048	329	797	851	1204	1011	1339	1032	1055	800
	ENSMUSG00000005534.11	Insr	-0.0255795	6.59515	0.0777942	0.781531	1	725	617	212	555	533	800	511	745	532	570	423
	ENSMUSG00000005540.11	Fcer2a	-0.238815	1.04303	0.572676	0.452968	0.803312	18	13	6	7	13	18	13	19	6	5	10
	ENSMUSG00000005547.15	Cyp2a5	-0.254174	-0.506166	0.166929	0.684708	0.953897	7	3	2	0	2	4	4	1	2	1	4
	ENSMUSG00000005553.15	Atp4a	-0.121268	-1.03112	0.0241154	0.877256	1	2	3	0	1	0	2	2	3	0	0	1
	ENSMUSG00000005566.15	Trim28	-0.0558135	6.8787	0.2532	0.617177	0.919256	858	825	409	787	745	735	677	880	647	796	603
	ENSMUSG00000005575.17	Ube2m	0.0219328	5.40519	0.0390995	0.844103	1	365	335	137	210	195	316	273	370	234	231	219
	ENSMUSG00000005580.12	Adcy9	0.0144401	5.12203	0.0164748	0.898416	1	237	242	98	179	189	246	195	289	183	190	159
	ENSMUSG00000005583.17	Mef2c	0.398823	6.76894	2.02533	0.170726	0.617516	1075	546	94	374	414	1181	616	1022	817	642	590
	ENSMUSG00000005609.17	Ctr9	-0.125671	5.09266	1.01481	0.318903	0.682743	270	200	64	186	171	249	178	273	125	199	97
	ENSMUSG00000005610.18	Eif4g2	0.00391953	9.56486	0.00109486	0.973744	1	5454.08	4020.21	1171	3874.07	4185.11	5876.06	3165.15	6300.19	3282	5156.18	2382.2
	ENSMUSG00000005611.16	Irag1	0.0366713	2.49186	0.0342673	0.992784	1	59	39	13	28	42	56	41	43	42	41	30
	ENSMUSG00000005615.16	Pcyt1a	0.296587	7.13957	7.92361	0.00710222	0.178804	1055.54	1120.73	373	801.41	822.71	1045.54	979.6	1062	1200.88	836.34	1101.72
	ENSMUSG00000005621.12	Zfp592	-0.132181	6.23488	1.92923	0.171378	0.617516	662	638	224	512	493	647	479	690	426	446	381
	ENSMUSG00000005625.16	Psmd4	0.0507075	6.3695	0.209963	0.648904	0.941988	646	669	333	507	493	547	536	663	695	503	450
	ENSMUSG00000005628.13	Tmod4	0.560461	4.81453	4.4535	0.0479726	0.391774	323	156	31	85	125	257	234	298	241	141	201
	ENSMUSG00000005640.12	Insrr	-0.464822	1.32282	2.29517	0.136463	0.560694	24	29	8	7	13	16	9	15	12	14	8
	ENSMUSG00000005649.18	Cabp5	0.170942	-1.47889	0.0205921	0.896562	1	0	1	0	0	0	0	0	0	1	0	0
	ENSMUSG00000005656.10	Snx6	-0.243745	5.3051	3.48707	0.068083	0.449283	295	271	68	174	198	369	147	307	196	196	107
	ENSMUSG00000005667.9	Mthfd2	0.137895	4.03913	0.817057	0.370644	0.738413	126	144	37	96	105	131	110	108	161	102	88
	ENSMUSG00000005672.13	Kit	0.127919	4.54355	0.840809	0.363839	0.731597	177	137	46	158	154	215	158	273	130	160	94
	ENSMUSG00000005674.10	Tomm40l	-0.0938714	4.25517	0.421514	0.519338	0.851811	162.69	140.96	74.34	112.24	119.48	138.32	108.9	118.45	125.65	106.12	125.02
	ENSMUSG00000005677.15	Nr1i3	0.29633	1.51645	0.92299	0.3416	0.706873	24.31	21.04	6.66	12.76	15.52	18.68	13.1	17.55	35.35	14.88	17.98
	ENSMUSG00000005681.13	Apoa2	1.76039	-1.26793	2.49643	0.122956	0.537995	1	0	1	0	0	0	0	0	5	0	2
	ENSMUSG00000005682.10	Pan2	-0.0451945	5.47554	0.188704	0.665982	0.946974	310	301	91	228	232	355	237	336	222	232	182
	ENSMUSG00000005683.9	Cs	-0.0458688	7.77848	0.265048	0.609082	0.9132	1576	1365	671	1094	1224	1556	1134	1690	1119	1213	1019
	ENSMUSG00000005686.18	Ampd3	0.160756	5.72027	2.15063	0.14916	0.58512	346.89	299	114.86	228	276.89	355.56	311.85	471.92	245.61	309.74	190.8
	ENSMUSG00000005687.15	Bcas2	0.131805	4.84153	1.37112	0.247513	0.628623	184	180	72	136	168	208	138	220	186	159	159
	ENSMUSG00000005696.12	Sh2d1a	-0.51913	0.93862	2.41011	0.127251	0.544267	9	17	4	7	19	18	9	8	6	10	9
	ENSMUSG00000005698.16	Ctcf	0.112523	6.15767	1.49557	0.22744	0.628623	505.9	495	160	374.95	383	566	427	528.92	425	418	388
	ENSMUSG00000005699.17	Pard6a	-0.0911784	1.80871	0.15337	0.697102	0.960816	28	20	6	17	30	20	19	29	18	16	13
	ENSMUSG00000005705.11	Agrp	0.529401	-0.425689	0.857781	0.359084	0.726531	3	2	2	1	2	2	2	4	3	5	1
	ENSMUSG00000005716.17	Pvalb	0.435866	7.28623	2.69297	0.117047	0.532525	1439	688	508	728	717	1249	1249	1693	1057	941	1134
	ENSMUSG00000005718.9	Tfap4	0.140642	3.53869	0.722888	0.399502	0.762332	83	102	24	48	51	92	93	70	82	66	45
	ENSMUSG00000005732.15	Ranbp1	0.101534	5.63192	0.550501	0.462757	0.805976	378	436	192	274	343	321	375	339.53	409.88	321	309.98
	ENSMUSG00000005763.16	Cd247	-0.365986	2.90912	3.27105	0.0769018	0.451261	64.15	55	18.61	45.57	67.49	74	34.71	63	47.21	49.07	17.59
	ENSMUSG00000005774.13	Rfx5	0.0552024	4.85184	0.198574	0.657917	0.946953	222.27	262	56	149.03	129	226.46	151.03	215.53	175.56	191.41	142.08
	ENSMUSG00000005779.13	Psmb4	0.0604495	6.651	0.25001	0.619611	0.920666	753	863	379	656	655	673	673	701	844	588	683
	ENSMUSG00000005800.4	Mmp8	-0.828858	2.83348	7.79581	0.00989817	0.20721	76	65	17	36	71	82	23	58	23	55	5
	ENSMUSG00000005802.13	Slc30a4	0.227849	6.0965	3.12363	0.0845486	0.470984	432	374	80	281	225	445	262	535	328	417	209
	ENSMUSG00000005803.15	Sqor	0.106439	3.5984	0.482834	0.490557	0.82884	95	102	40	70	98	91	88	99	71	77	105
	ENSMUSG00000005804.15	Bloc1s6	-0.191402	4.28911	1.48602	0.228954	0.628623	161	131	21	124	105	180	80	168	78	122	67
	ENSMUSG00000005813.13	Metap1	0.0607814	5.52923	0.358103	0.55243	0.875759	337	328	104	257	268	353	240	393	312	275	205
	ENSMUSG00000005823.10	Gpr108	0.029712	5.1507	0.0668567	0.797097	1	264	297	87	212	218	257	233	300	243	153	196
	ENSMUSG00000005824.8	Tnfsf14	0.396707	2.46013	3.3226	0.0746879	0.449283	37	54	11	28	38	35	56	37	58	27	38
	ENSMUSG00000005836.11	Gata6	-0.255797	2.11864	1.06373	0.307635	0.669142	30	16	16	20	20	21	23	24	15	20	7
	ENSMUSG00000005846.13	Rsl1d1	0.0176294	5.76204	0.0242811	0.876838	1	384	296	117	277	322	382	261	433	244	350	218
	ENSMUSG00000005864.8	Cnga2	2.09059	-1.17861	4.98899	0.0302985	0.32892	1	0	0	0	0	1	3	3	0	2	1
	ENSMUSG00000005871.16	Apc	0.0163936	7.36262	0.031837	0.859152	1	1331	1043	383	872	978	1474	836	1458	955	1071	754
	ENSMUSG00000005873.7	Reep5	0.0970642	7.14824	1.13907	0.291292	0.651589	952	891	359	796	860	999	857	1075	783	866	746
	ENSMUSG00000005881.14	Ergic3	0.173417	5.45953	2.10561	0.153391	0.592496	356	378	135	277	242	314	331	314	341	238	341
	ENSMUSG00000005882.19	Uqcc1	0.0489269	4.62385	0.174085	0.678403	0.950192	197	180	79	154	136	179	149	189	177	153	133
	ENSMUSG00000005883.16	Spo11	-1.57238	-0.383594	6.90915	0.0115443	0.221966	7	9	4	1	4	5	5	1	0	1	1
	ENSMUSG00000005886.15	Ncoa2	-0.121031	6.72811	1.03218	0.31495	0.677992	761	679	153	483	514	872	472	780	453	562	314
	ENSMUSG00000005892.5	Trh	0	-1.62433	0	1	1	0	0	0	0	0	0	0	0	0	0	0
	ENSMUSG00000005893.15	Nr2c2	-0.071287	6.61672	0.542717	0.464964	0.807806	820.51	632.8	220.65	501	622.79	890.79	502.54	810.17	505.41	658.73	408.25
	ENSMUSG00000005897.15	Nr2c1	0.0199547	3.61619	0.0186613	0.931441	1	93	79	20	54	62	90	61	86	57	76	49
	ENSMUSG00000005899.15	Smpd4	-0.09283	5.18104	0.812996	0.371826	0.73972	278	277	111	220	204	267	203	286	186	234	164
	ENSMUSG00000005907.15	Pex1	-0.144987	4.13986	1.14169	0.290745	0.650988	128.49	114.02	55	93.21	117.16	129.87	78.86	145.62	84.81	117.65	65.86
	ENSMUSG00000005917.16	Otx1	-0.0744281	3.87492	0.193843	0.661752	0.946974	82	71	33	51	52	73	78	62	41	69	37
	ENSMUSG00000005936.20	Kctd20	0.0335443	6.65167	0.134597	0.715357	0.972559	747	806	306	611	642	751	649	764	687	625	568
	ENSMUSG00000005947.12	Itgae	0.333067	1.88927	1.70643	0.197796	0.617516	29	19	8	14	17	27	34	17	28	18	19
	ENSMUSG00000005949.10	Ctns	-0.202803	4.14324	1.91744	0.172668	0.617516	162	110	37	86	87	153	98	154	64	79	62
	ENSMUSG00000005950.15	P2rx5	0.206405	1.49937	0.51055	0.478429	0.818476	23	8	4	15	18	21	15	18	10	17	23
	ENSMUSG00000005951.14	Shpk	0.376152	2.40634	3.62949	0.0628828	0.433564	47	36	12	16	31	39	38	38	44	36	34
	ENSMUSG00000005952.16	Trpv1	-0.255771	-1.11487	0.0569999	0.812338	1	0	1	0	0	1	1	1	1	0	0	0
	ENSMUSG00000005958.16	Ephb3	-0.129279	5.03476	1.01137	0.319717	0.683879	176	151	75	122	128	149	144	137	122	119	94
	ENSMUSG00000005968.15	Tuft1	0.220729	5.95588	3.43166	0.0702328	0.449283	147	149	83	158	139	171	194	209	159	157	126
	ENSMUSG00000005973.7	Rcn1	0.264638	6.24243	3.06263	0.0911717	0.485731	503	620	226	372	447	454	469	459	615	396	626
	ENSMUSG00000005980.16	Dnase1	-0.452346	2.23455	3.56214	0.065285	0.440586	34.17	39	6.88	29.84	33	38.32	24	41.26	14	24	7.97
	ENSMUSG00000005981.12	Trap1	0.0442648	5.52575	0.206279	0.651787	0.9438	372	342	118	248	275	341	294	370	305	268	212
	ENSMUSG00000005982.15	Naa60	-0.321873	5.59209	4.97566	0.0323067	0.336733	423.08	361.5	91.9	257.69	255.69	447.74	286.13	412.58	138.32	248.27	129.7
	ENSMUSG00000005983.16	1700037C18Rik	-0.206843	2.47786	0.990846	0.324625	0.68904	50.91	42.59	16.97	33.31	30.31	42.24	30.42	33.2	37.79	25.97	26.99
	ENSMUSG00000005986.17	Ankrd13d	0.0556641	1.87154	0.0369677	0.848358	1	14	15	9	13	19	12	18	26	12	11	7
	ENSMUSG00000005994.15	Tyrp1	0.157005	1.23864	0.294838	0.589698	0.899327	16	12	3	11	10	19	10	18	13	14	10
	ENSMUSG00000006005.19	Tpr	0.0308744	7.82078	0.111873	0.739508	0.989063	1824.62	1711.97	484.75	1206.6	1396.18	1921.68	1194.99	1931.21	1472.08	1404.17	1103.73
	ENSMUSG00000006007.15	Pdc	0	-1.62459	0	1	1	0	0	0	0	0	0	0	0	0	0	0
	ENSMUSG00000006010.15	Odr4	-0.0105427	4.91794	0.00929048	0.923622	1	255.47	213.09	67.25	141	169	273.57	158.39	248	196.28	181.83	125
	ENSMUSG00000006014.17	Prg4	0.0726552	10.0042	0.0535611	0.819426	1	8898.91	8945.94	1114	2634.4	4685.82	11114.7	7188.62	9168.79	6438.65	5166	2479.27
	ENSMUSG00000006019.16	Dhx34	-0.34328	4.69132	6.92971	0.0114295	0.22097	193	198	105	212	184	180	144	173	131	166	114
	ENSMUSG00000006021.6	Kptn	-0.324988	2.93265	2.4126	0.12706	0.544007	48	56	44	30	42	50	36	60	35	37	24
	ENSMUSG00000006024.14	Napa	-0.159542	6.06135	2.17932	0.146534	0.580494	501	508	155	380	364	515	396	519	255	434	209
	ENSMUSG00000006050.13	Sra1	0.254969	4.93721	3.76303	0.0584016	0.420646	221	246	82	165	193	184	225	186	250	186	213
	ENSMUSG00000006057.16	Atp5g1	-0.151915	5.41528	1.32779	0.255263	0.628623	352.59	279.11	137.08	244.85	272.57	294.78	284.33	382.52	179.81	234.54	147.54
	ENSMUSG00000006058.11	Snf8	-0.132059	4.70697	0.986089	0.325777	0.690493	191	161	107	170	188	175	136	197	140	181	131.01
	ENSMUSG00000006095.13	Tbcb	-0.192525	5.21608	1.53953	0.22376	0.628623	255.4	317.38	173	266.8	301	234	234.49	270.37	258.06	194.65	218.81
	ENSMUSG00000006127.10	Inpp5k	-0.0795627	5.67308	0.460058	0.500917	0.837568	403	325	100	255	293	428	257	433	246	272	199
	ENSMUSG00000006134.5	Crkl	-0.0417361	6.3628	0.20218	0.65503	0.945459	660	620	232	522	497	584	482	651	494	568	349
	ENSMUSG00000006143.13	Upk3bl	-1.26392	-1.53464	1.48828	0.271182	0.628623	0	0	0	1	0	0	0	0	0	0	0
	ENSMUSG00000006154.14	Eps8l1	0.306785	6.10542	2.18065	0.153707	0.593177	117	78	62	97	88	70	124	189	110	57	80
	ENSMUSG00000006169.21	Clint1	-0.0366041	6.7887	0.133815	0.716147	0.97287	838	861	203	571	619	912	573	957	627	636	404
	ENSMUSG00000006179.10	Prss16	-0.323906	0.613211	0.597037	0.443573	0.797927	8	13	3	3	9	8	3	7	6	9	4
	ENSMUSG00000006191.18	Cdkal1	-0.00510681	4.37615	0.0016954	0.96733	1	160	144	43	102	98	158	99	166	117	124	75
	ENSMUSG00000006204.8	Cdcp3	-0.453213	-0.656005	0.325054	0.571297	0.887964	1	3	0	2	2	2	0	3	1	2	0
	ENSMUSG00000006205.14	Htra1	-0.0765404	6.12855	0.65939	0.420862	0.778975	541	556	217	410	423	546	441	518	400	440	336
	ENSMUSG00000006215.13	Zbtb17	-0.0503205	4.56374	0.147794	0.702384	0.964032	173	184	79	141	147	158	147	168	121	119	156
	ENSMUSG00000006216.11	Clcnkb	-1.29857	-1.32026	1.21852	0.275262	0.633759	0	1	0	3	0	0	0	0	0	0	1
	ENSMUSG00000006218.5	Fam131c	0.370485	-0.337186	0.226842	0.636079	0.932307	1	4	0	2	1	0	1	5	2	1	0
	ENSMUSG00000006219.13	Fblim1	-0.414657	4.28117	8.48138	0.00547013	0.157028	155	175	95	184	170	174	130	177	93	133	91
	ENSMUSG00000006221.8	Hspb7	-0.361287	7.31257	3.52813	0.0746321	0.449283	1950	955	365	1078	1039	1382	944	1216	575	1094	498
	ENSMUSG00000006235.7	Epor	0.215908	-0.180385	0.121934	0.728793	0.981562	4	4	3	2	8	2	4	1	2	6	9
	ENSMUSG00000006241.17	Ccdc159	-0.702286	-0.343964	1.52343	0.223227	0.628623	4	2	2	5	4	7	2	3	2	1	4
	ENSMUSG00000006262.16	Mob1b	0.129056	6.36663	1.20365	0.278173	0.636739	501	437	108	350	385	670	314	596	449	494	305
	ENSMUSG00000006269.8	Atp6v1b1	-0.661489	1.40542	3.57568	0.0647942	0.438975	10	14	5	24	14	14	4	10	15	7	7
	ENSMUSG00000006273.15	Atp6v1b2	-0.224128	7.46537	4.84822	0.0326099	0.338166	1236	1280	588	1195	1309	1267	899	1324	1050	894	865
	ENSMUSG00000006276.11	Eps15l1	-0.180844	6.19551	3.43421	0.0701326	0.449283	553	516	175	411	424	559	367	598	365	374	252
	ENSMUSG00000006281.9	Tep1	-0.236169	6.8227	6.24562	0.0159955	0.252238	980	871.64	400	777.76	859	947	701	964	604	670	553.61
	ENSMUSG00000006288.9	Ttc5	0.0327556	4.92909	0.0435441	0.835961	1	204	268	136	200	183	204.98	205	197	263	150	222
	ENSMUSG00000006289.15	Osgep	-0.0138559	4.21834	0.0115884	0.914731	1	136.88	106.94	44.85	101.87	107.83	136.95	123	136.89	74	115.91	75
	ENSMUSG00000006299.14	Aamp	0.0804479	6.14725	0.199245	0.659653	0.946974	434	445	329	421	470	386	445	504	448	415	504
	ENSMUSG00000006301.18	Tmbim1	0.190451	7.23254	4.41015	0.0411108	0.367922	955.19	904	389.78	659	783	944	967.11	1072.6	875	827	696.07
	ENSMUSG00000006304.15	Arpc2	0.0442239	7.90857	0.182014	0.671593	0.947194	1799	2086	646	1459	1578	1852	1503	1914	1947	1389	1260
	ENSMUSG00000006307.17	Kmt2b	-0.0887138	6.86381	0.791183	0.378266	0.745966	833	942	441	720	734	857	798	937	652	703	574
	ENSMUSG00000006310.11	Zbtb32	0.0763558	2.39661	0.0998705	0.753414	0.999131	40	57	13	27	35	40	51	31	42	36	22
	ENSMUSG00000006311.9	Etv2	-1.26392	-1.56392	1.53128	0.271182	0.628623	0	0	0	1	0	0	0	0	0	0	0
	ENSMUSG00000006313.6	Upk1a	0.0774446	0.158392	0.0269844	0.870222	1	6	4	3	3	3	7	7	7	1	4	4
	ENSMUSG00000006315.10	Tmem147	0.283621	4.35347	3.50745	0.0673104	0.447247	159	138	31	78	86	151	135	174	150	94	81
	ENSMUSG00000006333.15	Rps9	-0.297204	8.64483	2.00951	0.171867	0.617516	2476.03	2529.71	2237.19	2778.41	3234.69	2301.35	2305.65	2668.48	2033.06	2478.49	2153.92
	ENSMUSG00000006335.17	Tfpt	-0.0673967	3.00803	0.0868107	0.769959	1	47	53	41	54	66	46	56	52	52	36	57
	ENSMUSG00000006342.16	Susd2	-0.083008	5.79596	0.433124	0.513666	0.847158	150	160	86	133	140	158	161	206	115	113	85
	ENSMUSG00000006344.18	Ggt5	-0.140023	3.77089	0.583493	0.449446	0.803182	132	136	43	57	81	102	100	92	60	106	54
	ENSMUSG00000006345.11	Ggt1	-0.656697	-0.0314117	1.77413	0.189284	0.617516	10	6	0	6	7	8	6	6	3	3	1
	ENSMUSG00000006356.11	Crip2	-0.0780901	6.66803	0.526742	0.471573	0.813091	642	680	208	466	495	674	559	727	356	529	330
	ENSMUSG00000006360.12	Crip1	-0.227601	7.34312	3.95678	0.0525115	0.409634	1217	1155	667	1225	1452	1359	1065	1347	950	1019	857
	ENSMUSG00000006362.17	Cbfa2t3	-0.587343	4.85785	23.9036	1.21875e-05	0.00812508	254.51	296.21	107.86	274.96	221.39	301.58	167.91	191.74	133	199	119.81
	ENSMUSG00000006369.15	Fbln1	-0.165601	6.06136	1.99358	0.164543	0.614943	695	601	202	418	433	557	490	603	291	474	299
	ENSMUSG00000006373.11	Pgrmc1	0.0220917	5.82802	0.0506977	0.822828	1	435	355	106	324	336	429	315	443	303	354	238
	ENSMUSG00000006378.16	Gcat	0.305175	4.7658	5.13967	0.0280188	0.322593	108.42	84	31.89	65	75	89.53	81.53	131	87	83	83
	ENSMUSG00000006386.16	Tek	-0.0091152	4.50577	0.00521172	0.942755	1	213	183	48	146	153	229	136	173	186	170	113
	ENSMUSG00000006389.14	Mpl	-1.22098	-0.0813158	3.9562	0.0544556	0.416063	14	10	2	1	10	10	1	3	0	11	1
	ENSMUSG00000006390.16	Elovl1	-0.237647	5.94197	3.1215	0.0848226	0.471495	349	320	95	218	224	350	242	384	161	204	118
	ENSMUSG00000006392.17	Med8	0.33674	5.07132	7.43163	0.00897251	0.197618	231	245	70	199	185	215	230	252	306	189	202
	ENSMUSG00000006395.17	Hyi	0.440316	2.76926	5.28062	0.0260531	0.315153	53	63	17	35	41	44	58	51	68	37	63
	ENSMUSG00000006398.16	Cdc20	-0.146579	4.38353	1.12727	0.293775	0.654721	138	185	66	140.92	143	136	129.99	110	123	124	118
	ENSMUSG00000006403.14	Adamts4	0.553934	4.38733	3.91101	0.062235	0.431932	150	151	51	140	114	88	166	206	220	164	106
	ENSMUSG00000006411.13	Nectin4	0.173337	6.04486	1.79792	0.186721	0.617516	231	246	131	226	206	216	261	272	229	190	252
	ENSMUSG00000006412.11	Pfdn2	0.452164	4.29447	6.83892	0.013176	0.233285	157.38	162.52	42	98.78	101	135.78	140.62	126.18	199.78	95.29	189.66
	ENSMUSG00000006418.18	Rnf114	0.0579823	6.87133	0.260826	0.61194	0.91519	975	1075	345	879	699	857	823	1012	954	703	683
	ENSMUSG00000006423.16	C330007P06Rik	0.182384	5.2032	2.48073	0.121946	0.536279	266.7	309.95	81.61	162.21	183.99	307.67	204.35	269.81	287.45	243.27	195.81
	ENSMUSG00000006435.17	Neurl1a	0.310647	3.74763	3.18007	0.0810988	0.462551	127.97	75.77	18.15	59.51	70.34	109.24	103.85	132.42	83.71	77.38	65
	ENSMUSG00000006442.11	Srm	-0.154143	4.77344	1.56232	0.217505	0.628623	249	236	91	141	167	196	161	242	132	177	111
	ENSMUSG00000006445.4	Epha2	0.164862	5.10605	1.80648	0.185372	0.617516	213	159	75	175	167	164	185	232	139	184	159
	ENSMUSG00000006456.11	Rbm14	0.14851	5.98755	2.00319	0.16355	0.612683	479.62	529.52	149.93	317.53	315.19	448.88	452.1	514.21	441.04	352.08	283.38
	ENSMUSG00000006457.5	Actn3	0.734795	7.30165	7.88811	0.0111232	0.217734	1577	791	440	765	627	1131	1325	1778	1385	956	1745
	ENSMUSG00000006462.7	A530013C23Rik	0.270231	2.76708	1.83474	0.182035	0.617516	39	28	15	23	27	45	31	50	17	48	32
	ENSMUSG00000006463.14	Zdhhc24	-0.112032	3.16484	0.454319	0.503587	0.839562	65	81	24	46	54	56	52	78	51	37	36
	ENSMUSG00000006464.10	Bbs1	0.245068	3.24157	2.40336	0.127772	0.544735	56	57	20	54	48	71	70	70	51	65	44
	ENSMUSG00000006469.14	Slc34a3	0	-1.5343	0	1	1	0	0	0	0	0	0	0	0	0	0	0
	ENSMUSG00000006471.19	Ndor1	-0.0652937	5.34194	0.316046	0.576661	0.890948	238.88	260	96.25	240.02	207.91	247.45	196.35	318.82	141.22	228.49	164.21
	ENSMUSG00000006476.20	Nsmf	-0.21432	4.49755	3.10229	0.0846761	0.471298	194	190	80	165	173	185	167	172	131	152	96
	ENSMUSG00000006494.12	Pdk1	0.35968	5.76781	11.9128	0.00118756	0.0787171	381	307	122	235	275	388	323	409	395	316	341
	ENSMUSG00000006498.17	Ptbp1	-0.130195	7.60395	1.21812	0.275581	0.634001	1533.74	1567.88	397.49	1020.75	1031.8	1595.93	1102.69	1748.69	766.53	1232.87	578.28
	ENSMUSG00000006517.6	Mvd	-0.182451	3.6311	1.20692	0.27753	0.636024	97	96	44	63	69	61	78	80	65	56	44
	ENSMUSG00000006519.12	Cyba	-0.520114	6.20089	5.19452	0.0340768	0.342188	534	750	403	798	768	563	484	570	452	387	446
	ENSMUSG00000006522.18	Itih3	-0.336259	-0.578356	0.204691	0.653039	0.94444	2	2	1	3	4	0	0	2	1	4	1
	ENSMUSG00000006526.14	Stimate	0.148628	4.18278	1.2181	0.275344	0.633845	155	156	43	107	92	145	125	128	103	127	137
	ENSMUSG00000006527.17	Sfmbt1	0.0659864	5.30267	0.35575	0.553733	0.876589	346	285	78	246	239	346	244	366	233	299	178
	ENSMUSG00000006538.13	Ihh	-0.525592	-0.753156	0.442259	0.509279	0.844893	4	2	0	2	0	3	1	1	1	3	0
	ENSMUSG00000006542.14	Prkag3	0.0868887	1.86028	0.0947146	0.759624	1	34	11	7	18	28	30	23	35	9	18	27
	ENSMUSG00000006546.4	Cryba2	0	-1.62401	0	1	1	0	0	0	0	0	0	0	0	0	0	0
	ENSMUSG00000006567.12	Atp7b	1.48191	-1.22291	2.6544	0.109938	0.532283	1	2	0	0	0	0	3	2	1	2	0
	ENSMUSG00000006574.16	Slc4a1	-0.845372	2.8477	2.4211	0.13603	0.559585	129	75	22	89	174	80	26	37	25	156	17
	ENSMUSG00000006575.15	Rundc3a	0.273818	1.23092	0.716539	0.401564	0.76401	12	16	2	13	7	9	9	9	14	15	11
	ENSMUSG00000006576.17	Slc4a3	-0.0290017	4.31613	0.0368231	0.848651	1	192	171	86	134	132	158	159	145	115	132	160
	ENSMUSG00000006585.4	Cdt1	-0.303233	4.71062	5.02517	0.0297334	0.327194	232	247	128	194	178	194	180	205	174	167	101
	ENSMUSG00000006586.16	Runx1t1	0.0436436	2.78011	0.0586844	0.80964	1	65	50	23	38	32	56	32	58	47	48	41
	ENSMUSG00000006587.7	Snai3	-0.872144	0.15678	3.00551	0.0895272	0.482701	12	9	2	2	3	9	3	4	1	4	4
	ENSMUSG00000006589.9	Aprt	-0.239899	5.02153	3.07095	0.0862933	0.474319	259	262	152	226	242	248	244	214	204	176	171
	ENSMUSG00000006599.14	Gtf2h1	0.173674	5.27107	2.46282	0.123267	0.538379	239	303	85	193	225	286	213	310	295	198	215
	ENSMUSG00000006611.16	Hfe	-0.132365	4.12021	1.13929	0.291245	0.65156	148	119	53	88	105	149	105	139	88	105	69
	ENSMUSG00000006638.16	Abhd1	-0.0869093	0.258823	0.038498	0.845291	1	5.76	4.8	2.61	8.23	4.57	7.01	6.83	7.63	8.21	3.75	0
	ENSMUSG00000006641.13	Slc5a6	0.0319759	3.23272	0.0403932	0.849778	1	67	79	18	59	56	61	67	73	52	55.19	40
	ENSMUSG00000006642.4	Tcf23	1.98685	-1.24812	3.79808	0.0572846	0.418257	0	0	0	0	0	1	1	1	0	2	1
	ENSMUSG00000006649.18	Nphs1	-0.790508	5.07769	8.99933	0.0072	0.18057	200.66	270.96	105.83	191.65	188.35	226.12	128.49	219.24	62.87	169.95	26.24
	ENSMUSG00000006651.9	Aplp1	0.0582191	1.13971	0.0303781	0.862382	1	8	22	12	12	15	11	21	11	10	15	14
	ENSMUSG00000006673.15	Qrich1	0.00204789	6.7418	0.000448204	0.983199	1	894.78	850.7	243.38	554.32	547	879.14	607.92	838.5	699.03	652.1	445.9
	ENSMUSG00000006675.11	P4htm	0.0438827	0.991242	0.0171819	0.896271	1	16	12	7	15	8	12	15	16	6	14	10
	ENSMUSG00000006676.17	Usp19	-0.0214734	7.09325	0.043268	0.836119	1	953	956	507	770	836	859	813	1009	856	778	700
	ENSMUSG00000006678.7	Pola1	0.125314	5.02211	1.06926	0.306395	0.668038	242	237	65	151	208	259	158	240	246	222	162
	ENSMUSG00000006699.18	Cdc42	-0.240216	8.37548	4.72444	0.0348001	0.344692	2550	2576	637	2021	2117	2973	1526	2807	1526	2045	1089
	ENSMUSG00000006705.14	Pknox1	-0.140941	4.94724	1.8332	0.182215	0.617516	248	228.92	76	191	178	237	160	232	150	198	132
	ENSMUSG00000006711.16	D130043K22Rik	0.650773	-1.22758	0.366297	0.547936	0.872796	0	1	0	0	0	1	0	2	0	1	0
	ENSMUSG00000006715.12	Gmnn	-0.112886	2.84503	0.252504	0.617956	0.919537	48	53	35	44	61	45	42	39	56	42	46
	ENSMUSG00000006717.8	Acot13	0.127318	2.40455	0.314525	0.577576	0.891568	41	25	7	20	22	33	23	41	39	20	11
	ENSMUSG00000006720.17	Zfp184	-0.960248	-0.735625	1.13683	0.291762	0.652002	2	0	0	2	5	1	2	1	0	0	1
	ENSMUSG00000006724.13	Cyp27b1	-0.163344	-0.020855	0.0947464	0.759585	1	6	5	3	2	1	6	4	3	3	6	1
	ENSMUSG00000006728.13	Cdk4	-0.0684955	6.09325	0.434216	0.513138	0.846747	517.97	610.61	202.97	431.36	492.13	465.94	411.26	528.91	419.99	431.05	374.47
	ENSMUSG00000006731.11	B4galnt1	-0.555885	5.40102	13.9006	0.000722898	0.0634448	366.8	399.34	179.76	352.36	393.57	382.89	291.99	401.88	147.44	259.04	136.72
	ENSMUSG00000006732.15	Mettl1	0.109478	3.50209	0.541558	0.465439	0.808191	93	87	22	51	70	70	78	81	72	68	48
	ENSMUSG00000006736.10	Tspan31	-0.26334	4.93598	5.55323	0.0226592	0.294912	263.03	241.39	79.03	166.64	176.87	240.06	146.74	266.09	143.01	158.95	103.53
	ENSMUSG00000006740.15	Kif5b	0.177559	7.91536	3.59387	0.0641408	0.437633	1518.87	1391.81	638.59	1205.95	1355.51	1659.81	1232.61	1793.92	1660.77	1580.92	1135.94
	ENSMUSG00000006763.15	Saal1	-0.05719	3.84138	0.182277	0.67137	0.947075	103	111	32	73	79	121	85	97	77	81	67
	ENSMUSG00000006764.9	Tph2	-0.958138	-1.34722	0.774158	0.398671	0.761599	1	0	0	0	1	1	0	1	0	0	0
	ENSMUSG00000006777.8	Krt23	0.747641	3.85534	8.56007	0.00527397	0.154145	13	13	5	8	8	17	16	23	25	6	19
	ENSMUSG00000006782.17	Cnp	-0.292413	5.70889	4.8461	0.0336154	0.34149	459.81	442.7	277.73	443.91	444.6	461.65	365.31	445.21	325	322.94	337.13
	ENSMUSG00000006784.15	Odad4	0.312596	-0.382342	0.240731	0.625958	0.924912	3	2	3	2	1	1	3	3	1	5	1
	ENSMUSG00000006800.15	Sulf2	-0.0159858	6.31971	0.0311493	0.860665	1	630	634.23	188.25	439.18	428	592.18	484	606	445	477	354.79
	ENSMUSG00000006818.6	Sod2	0.321569	7.26483	7.62628	0.00821324	0.191462	1141.31	1301.67	282.72	785.47	752.33	1112.12	1002.85	1322.03	1378.57	906.5	790.82
	ENSMUSG00000006850.9	Tmco6	-0.0543892	2.59838	0.0605793	0.806653	1	43	24	18	31	38	45	33	40	29	24	34
	ENSMUSG00000006906.11	Stambp	0.150721	4.80292	1.60338	0.211655	0.620974	180	162	50	131	129	196	122	245	160	126	127
	ENSMUSG00000006920.15	Ezh1	0.0476067	6.05726	0.230636	0.633277	0.930088	494	454	155	328	373	562	377	515	402	331	367
	ENSMUSG00000006930.16	Hap1	0.64192	2.85822	8.93359	0.00453233	0.146085	49	75	22	34	38	22	71	79	64	58	45
	ENSMUSG00000006931.16	P3h4	-0.401636	3.85026	7.336	0.00939326	0.202448	96	92	40	72	64	81	64	78	50	44	48
	ENSMUSG00000006932.18	Ctnnb1	0.166976	8.59942	3.79302	0.0574444	0.418444	2966.82	2736.91	875.92	2064.78	2142.79	2870.77	2214.91	3216.78	2538.81	2469.85	2101.95
	ENSMUSG00000006941.6	Eif1b	0.261167	4.10598	1.22303	0.280715	0.639813	135	227	29	101	86	132	125	124	223	83	115
	ENSMUSG00000006948.8	Klk4	0	-1.62412	0	1	1	0	0	0	0	0	0	0	0	0	0	0
	ENSMUSG00000006958.15	Chrd	0.057066	3.00437	0.112541	0.73876	0.988445	81	68	31	41	57	66	61	66	52	59	58
	ENSMUSG00000006998.17	Psmd2	0.293949	7.78049	7.9901	0.00688307	0.176618	1733.06	1680.31	599.62	1222.69	1371.3	1530.49	1499.77	1825.64	1874.11	1298.26	1655.89
	ENSMUSG00000007021.6	Syngr3	-0.538165	-0.416171	0.567758	0.454903	0.803312	2	2	0	5	1	4	2	5	1	0	0
	ENSMUSG00000007029.17	Vars	-0.210793	6.63075	2.46287	0.125945	0.542647	775	807	435	661	760	602	658	754	508	679	464
	ENSMUSG00000007030.9	Vwa7	0.669955	1.86851	6.50472	0.0140711	0.240178	27.3	24	5	12	13	22.67	45	30	19.63	23	16.83
	ENSMUSG00000007033.5	Hspa1l	0.0804525	2.73466	0.149694	0.700571	0.963027	66.53	43.93	12.24	28.32	44.13	44.71	40.89	44.24	53.42	34.64	32.19
	ENSMUSG00000007034.16	Slc44a4	-2.67585	-1.22507	4.40286	0.0417793	0.370236	1	2	0	0	0	1	0	0	0	0	0
	ENSMUSG00000007035.16	Msh5	-0.12409	1.21621	0.174731	0.677842	0.950016	15	16	5	11	16	9	15	13	8	9	10
	ENSMUSG00000007036.16	Abhd16a	0.0166285	5.21325	0.0231409	0.879741	1	294	306	110	223	227	253	255	317	245	192	190
	ENSMUSG00000007038.6	Neu1	-0.391928	4.62176	9.3385	0.00368999	0.1334	215	217	110	182	204	203	159	194	138	125	123
	ENSMUSG00000007039.13	Ddah2	-0.125472	3.7523	0.324588	0.573587	0.88921	116	130	72	77	98	84	104	83	58	92	110
	ENSMUSG00000007041.10	Clic1	-0.510788	7.44317	11.9434	0.00179001	0.0945948	1277	1286	861	1298	1491	1247	969	1453	667	1011	659
	ENSMUSG00000007050.18	Lsm2	0.0303166	3.36027	0.0404877	0.937837	1	83	76	21	45	67	70	64	81	58	46	54
	ENSMUSG00000007080.15	Pole	-0.0978084	5.16981	0.712901	0.402753	0.765138	270	252	87	182	265	292	233	271	171	217	151
	ENSMUSG00000007097.15	Atp1a2	0.613542	8.57493	13.5503	0.00122579	0.0795248	3755.43	2211.81	817.78	1573.87	1749.78	3439.34	3237.7	4126.14	2955.98	2985.23	3100.79
	ENSMUSG00000007107.7	Atp1a4	1.34611	-1.42375	1.46514	0.232156	0.628623	0	1	0	0	0	0	0	0	2	1	0
	ENSMUSG00000007122.12	Casq1	0.517965	6.55966	3.45877	0.0782919	0.454707	780	460	251	404	478	791	738	852	671	512	880
	ENSMUSG00000007207.11	Stx1a	0.144466	1.45851	0.191688	0.66354	0.946974	18	15	19	14	11	7	24	22	14	8	15
	ENSMUSG00000007209.5	Ceacam9	-1.24622	-1.62419	1.4971	0.271182	0.628623	0	1	0	0	0	0	0	0	0	0	0
	ENSMUSG00000007216.7	Zfp775	-0.235111	2.50925	1.41392	0.240369	0.628623	54	63	18	36	40	36.83	28	48	36	21	41
	ENSMUSG00000007279.15	Scube2	-0.370249	0.544259	0.754265	0.389535	0.755554	14	15	4	9	6	7	8	8	1	11	7
	ENSMUSG00000007338.11	Mrpl49	0.129859	3.81619	0.818091	0.370344	0.738155	101	84	33	62	77	85	92	114	67	79	54
	ENSMUSG00000007379.16	Dennd2c	0.163021	5.37105	1.98321	0.165622	0.616926	173	149	56	113	143	234	144	202	143	194	115
	ENSMUSG00000007411.17	Mark3	0.0714586	6.50836	0.682692	0.412829	0.773096	643	623	206	485	470	723	491	674	576	530	439
	ENSMUSG00000007415.16	Gatad1	-0.0800968	5.3491	0.613353	0.43745	0.7922	324.94	260.96	106	211.79	237.41	372.86	220.49	334.46	231.55	229	173.53
	ENSMUSG00000007440.11	Pcdha11	-0.845463	-1.33617	0.457095	0.503375	0.83937	0	0	5.07	0	0	0	0	0	1.32	1.18	0
	ENSMUSG00000007458.15	M6pr	-0.0227963	7.33916	0.049219	0.825388	1	1227.87	1460.96	419.86	1105.21	1107.88	1348.39	1038.91	1428.28	1192	954.88	817.89
	ENSMUSG00000007476.19	Lrrc8a	0.0693923	5.96877	0.549509	0.4622	0.805614	489.18	481.71	181.54	349.41	387.97	483.62	434.19	616.05	381.93	369.36	301.15
	ENSMUSG00000007480.6	Mc5r	-0.108972	3.93634	0.564701	0.456113	0.803312	115	122	33	75	96	148	78	151	70	95	60
	ENSMUSG00000007564.16	Ppp2r1a	-0.211972	7.08852	3.99707	0.05137	0.405487	952	954	387	836	891	981	778	1067	532	842	477
	ENSMUSG00000007570.17	Fance	0.0546985	4.39713	0.0325618	0.858677	1	114	149	146	119	137	90	139	124	148	119	178
	ENSMUSG00000007589.10	Tinf2	-0.141462	4.86306	1.58852	0.213749	0.623689	237.05	199.4	97.62	167.68	197.72	221.06	161.45	249.49	165.54	164.77	125.56
	ENSMUSG00000007591.16	Tssk4	-0.154	0.652936	0.147631	0.702539	0.964103	12	11	1	6	6	6	12	8	5	5	1
	ENSMUSG00000007594.11	Hapln4	-1.08156	-0.447964	2.72089	0.105701	0.522952	4	1	2	5	4	5	3	1	2	1	1
	ENSMUSG00000007603.10	Dus3l	-0.305268	4.46861	4.71369	0.0349976	0.34541	181	189	81	154	113	153	141	152	90	134	83
	ENSMUSG00000007610.16	Gtpbp3	-0.0788945	4.18079	0.277861	0.600582	0.906702	146	128	76	95	136	119	116	116	99	107	121
	ENSMUSG00000007613.16	Tgfbr1	0.339153	5.80763	8.16088	0.00635245	0.169792	391	336	82	265	310	565	297	537	399	406	327
	ENSMUSG00000007617.19	Homer1	0.185633	4.93571	2.53329	0.118161	0.532525	199	202	58	145	171	247	140	258	199	190	163
	ENSMUSG00000007646.14	Rad51c	0.532967	1.51204	3.33495	0.0741679	0.449283	21	15	4	11	6	14	16	10	18	19	19
	ENSMUSG00000007653.13	Gabrb2	0.294967	-0.595458	0.177815	0.675177	0.948625	5	4	0	1	1	1	1	2	1	6	2
	ENSMUSG00000007655.17	Cav1	-0.0441736	7.70682	0.110647	0.741487	0.990242	1668	1467	291	1062	1156	2232	1093	1682	1087	1338	831
	ENSMUSG00000007656.14	Arpp19	0.556794	5.8197	19.7128	5.61905e-05	0.0182052	382	332	84	236	227	427	326	394	498	320	404
	ENSMUSG00000007659.19	Bcl2l1	-0.0425727	6.67977	0.11488	0.73649	0.986626	819	940	482	859	740	649	787	958	734	641	692
	ENSMUSG00000007670.11	Khsrp	0.095794	7.07912	1.03513	0.314157	0.677253	1058	1028	457	761	772	911	944	1041	916	842	755
	ENSMUSG00000007682.8	Dio2	0.527228	3.51606	8.87746	0.00455524	0.146085	102	82	17	33	57	77	80	92	86	110	57
	ENSMUSG00000007721.7	Ccdc124	0.362562	4.46633	4.0718	0.0526179	0.410003	146	188	76	110	136	98	170	148	205	108	177
	ENSMUSG00000007739.11	Cct4	0.0536111	6.712	0.303397	0.584365	0.89638	724	646	224	604	618	801	503	821	631	670	478
	ENSMUSG00000007777.10	0610009B22Rik	0.184458	2.66254	0.795046	0.377113	0.74488	40	38	5	19	27	44	35	41	34	31	18
	ENSMUSG00000007783.11	Cpt1c	-0.366989	2.9174	4.29175	0.0438019	0.375768	61	65	37	46	58	65	46	59	43	48	26
	ENSMUSG00000007805.5	Twist2	-0.482255	2.78831	5.67682	0.0212799	0.287495	59.29	69.16	36.49	40.58	55.96	50.46	51.89	46.77	25.04	43.29	25.18
	ENSMUSG00000007812.17	Zfp655	-0.0974676	5.64701	0.313263	0.580769	0.89387	403	281	77	245	265	463	232	448	170	357	130
	ENSMUSG00000007815.14	Rhoa	0.119831	8.39331	1.29762	0.260412	0.628623	2422.37	3059.19	966.11	2026.22	2040.71	2575.08	2196.29	2386.1	2904.04	2023.7	2113.49
	ENSMUSG00000007817.16	Zmiz1	-0.27979	7.80575	4.74897	0.0358614	0.348043	1976.8	1740.58	459.99	1243.43	1244.06	2187.72	1359.08	1812.56	824.68	1349.36	629.55
	ENSMUSG00000007827.11	Ankrd26	0.138412	3.426	0.889577	0.350407	0.717263	86	69	21	68	58	76	60	72	77	65	64
	ENSMUSG00000007833.16	Aldh16a1	0.0532457	5.04354	0.0902334	0.766245	1	205	204	148.64	217	241	184	224	214.06	212	203.55	227.29
	ENSMUSG00000007836.7	Hnrnpa0	-0.0493086	7.00996	0.0621877	0.805589	1	807	942	782	912	874	819	910	937	845	914	904
	ENSMUSG00000007837.12	Prrg2	-0.0731228	3.30843	0.196534	0.814357	1	48	62	26	52	57	47	40	70	41	50	37
	ENSMUSG00000007850.17	Hnrnph1	0.425045	7.56451	12.8294	0.000851147	0.067676	1206.83	1163	518	884	1080.95	1390.9	1181	1347	1771	1107	1448.87
	ENSMUSG00000007867.10	Ift43	0.102279	2.33246	0.220008	0.641199	0.935974	28	38	16	27	17	38	30	31	30	27	28
	ENSMUSG00000007872.4	Id3	-0.324572	5.2796	4.32377	0.0457756	0.38213	283	274	165	241	238	277	199	317	129	254	144
	ENSMUSG00000007877.3	Tcap	0.195749	7.02659	0.481459	0.496065	0.832949	1164	585	684	671	829	1078	1086	1382	773	742	1102
	ENSMUSG00000007880.17	Arid1a	-0.0653361	7.79324	0.512962	0.477397	0.817402	1855	1801	542	1249	1237	1692	1404	1855	1117	1275	965
	ENSMUSG00000007888.16	Crlf1	-0.240367	2.92299	1.25075	0.269085	0.628623	40	56	22	40	36	44	42	38	23	46	21
	ENSMUSG00000007891.17	Ctsd	-0.527529	8.79858	26.0567	5.88061e-06	0.00657623	3245	3248	1510	3131	3196	3713	2130.22	3403	1673.31	2270	1422.71
	ENSMUSG00000007892.9	Rplp1	-0.286334	8.35525	2.07823	0.16472	0.615274	2188.75	1471.68	1169.93	1731.75	1925.91	2246.7	1650.83	2762.87	790	1993	825
	ENSMUSG00000007908.15	Hmgcll1	0.136288	1.84725	0.296954	0.605021	0.910153	28	19	4	17.9	13	37	19	35	13	17	22
	ENSMUSG00000007944.9	Ttc9b	0.928766	-0.764393	1.69729	0.19898	0.617516	3.41	1.34	0	0	1.15	1.15	2.31	4.78	1.05	1.2	2.26
	ENSMUSG00000007946.12	Phox2a	-0.910757	-0.592111	2.03196	0.160619	0.607414	5	2	1	7	4	2	4	1	1	1	2
	ENSMUSG00000007950.10	Abhd8	-0.140782	3.53993	0.799435	0.375811	0.743359	73	87	42	74	67	86	63	75	62	66	62
	ENSMUSG00000007987.13	Ift22	-0.166999	4.20199	1.57476	0.215711	0.626671	159	161	62	138	123	161	144	164	115	115	68
	ENSMUSG00000007989.8	Fzd3	0.097539	3.58582	0.333442	0.566391	0.884326	100	55	16	69	58	88	63	113	61	68	38
	ENSMUSG00000008028.16	1700008O03Rik	-0.554512	-1.39763	0.214675	0.670373	0.946974	0	0	1	0	0	1	0	1	0	0	0
	ENSMUSG00000008035.13	Mid1ip1	0.427142	5.89016	16.7888	0.000163439	0.0336394	405	458.26	140.39	303.3	287.61	392	481	498	443	430.66	342
	ENSMUSG00000008036.12	Ap2s1	-0.374882	5.61621	5.51953	0.0261227	0.31545	352	399	255	347	404	340	306	358	242	277	248
	ENSMUSG00000008090.15	Fgfrl1	-0.102423	3.25129	0.373389	0.544102	0.870599	107	68	25	63	43	94	49	85	60	67	45
	ENSMUSG00000008129.15	Brme1	-0.00820296	0.257712	0.000166413	0.989762	1	4	3	3	5	6	1	2	6	7	3	1
	ENSMUSG00000008136.15	Fhl2	-0.319552	3.8707	4.26383	0.044464	0.378112	92	79	36	85	74	75	57	78	46	78	41
	ENSMUSG00000008140.19	Emc10	-0.0698265	5.27024	0.374691	0.543403	0.870187	307	343	140	241	243	256	282	300	249	235	174
	ENSMUSG00000008153.13	Clstn3	0.110608	2.16421	0.217408	0.643172	0.937668	36	45	18	26	24	31	32	31	26	38	34
	ENSMUSG00000008167.15	Fbxw9	0.267774	3.90742	2.5978	0.113697	0.532525	89.67	85.14	66.89	74.5	85.21	67	102.35	107.62	104.38	91	87.59
	ENSMUSG00000008193.14	Spib	-0.866521	2.01416	10.5877	0.00211043	0.101856	31	36	15	25	45	38	18	21	13	29	7
	ENSMUSG00000008200.16	Fnbp4	0.114727	6.70419	1.7281	0.195022	0.617516	705	755	271	587	641	750	624	886	712	639	505
	ENSMUSG00000008206.17	Cers4	-0.0322004	6.99145	0.096923	0.756928	1	794.95	753	323	703.51	642.81	747	540.45	858	626.65	762.97	505
	ENSMUSG00000008226.15	Scrn3	0.313283	3.3935	3.30074	0.0756179	0.449283	70	64	10	33	35	83	60	88	62	50	36
	ENSMUSG00000008301.12	Phax	0.0323428	4.22886	0.0644493	0.911276	1	152.53	154.45	38.62	107.7	100.89	138.25	103.7	143	139	114	80
	ENSMUSG00000008305.19	Tle1	0.0476271	4.7174	0.14509	0.704986	0.965845	190.91	166	104.25	154	154	207	179.79	210	177.91	155	140.42
	ENSMUSG00000008307.12	1700109H08Rik	-0.177908	2.7042	0.670446	0.417022	0.77585	63	44	9	34	36	45	30	44	28	47	18
	ENSMUSG00000008318.11	Relt	-0.133428	3.6635	0.622133	0.43421	0.789937	103	120	45	132	105	89	115	108	69	85	80
	ENSMUSG00000008333.13	Snrpb2	0.233327	4.41209	2.81109	0.100244	0.508086	134	157	28	106	123	157	112	159	158	123	114
	ENSMUSG00000008348.10	Ubc	-0.37838	7.676	4.26623	0.0513234	0.405383	1933.96	1440.19	559	1189	1322.16	1693.14	1140.29	1868.68	577.21	1313.95	479
	ENSMUSG00000008373.17	Prpf31	0.322037	5.12074	7.81374	0.00748067	0.182451	294.56	297.62	82.21	186.1	185.75	241.78	250.04	283.22	329.88	212.8	227.17
	ENSMUSG00000008384.9	Sertad1	-0.0416566	4.98132	0.0616575	0.805628	1	214	198	146	248	220	187	217	260	183	186	193
	ENSMUSG00000008393.10	Carhsp1	0.11955	6.86592	1.64457	0.205978	0.617516	1016.65	931.91	326.78	759.35	757.41	877.74	793.64	1159.13	818.29	903.16	581.83
	ENSMUSG00000008398.17	Elk3	-0.177933	6.06821	2.53705	0.117895	0.532525	655.06	564.21	152.89	516.48	464.2	636.83	388.97	603.08	375.14	492.67	306.28
	ENSMUSG00000008429.9	Herpud2	0.118171	5.77971	1.51604	0.224335	0.628623	375	383	114	269	266	442	303	426	354	324	236
	ENSMUSG00000008435.16	Rdh13	0.275082	4.83597	4.99975	0.0301292	0.328559	167	124	70	119	107	128	124	212	120	140	141
	ENSMUSG00000008438.4	Adam21	-0.327865	-0.396882	0.26764	0.607342	0.91221	4	2	0	1	3	4	1	2	3	3	0
	ENSMUSG00000008450.9	Nutf2	0.361216	3.64766	3.66368	0.0629	0.433596	98.9	103.08	23.07	40.53	72.11	96.74	77.4	103.6	98.42	77.72	89.15
	ENSMUSG00000008461.7	Fut1	0.108398	2.96519	0.265089	0.609054	0.9132	19	16	12	17	18	24	26	19	19	19	13
	ENSMUSG00000008475.14	Arpc5	-0.0295634	7.54811	0.0910788	0.764139	1	1372	1461	534	1130	1035	1615	1023	1450	1307	1046	972
	ENSMUSG00000008482.10	Rnf151	-0.518668	-0.83822	0.438177	0.511231	0.846322	1	2	1	2	1	2	4	0	0	0	1
	ENSMUSG00000008489.19	Elavl2	0.231805	-1.17858	0.046932	0.829427	1	0	0	0	1	0	2	0	1	0	1	1
	ENSMUSG00000008496.20	Pou2f2	-0.132437	4.82044	0.678358	0.416106	0.775221	232	237	97	238	218	236	182	255	219	158	156
	ENSMUSG00000008540.12	Mgst1	-0.176114	5.63416	1.187	0.285411	0.644826	377	321	86	307	266	420	229	454	153	356	127
	ENSMUSG00000008575.18	Nfib	0.21589	8.66037	4.56773	0.0378042	0.356033	3068	2357	735	1728	1868	3140	2076	2861	2422	2669	1943
	ENSMUSG00000008601.13	Rab25	0.132453	5.47636	0.976984	0.327998	0.692617	141	114	49	99	99	150	153	196	82	114	62
	ENSMUSG00000008604.12	Ubqln4	0.223155	5.70434	4.12931	0.0478106	0.391462	398	355	79	273	246	363	342	484	282	309	217
	ENSMUSG00000008658.17	Rbfox1	0.591973	3.89938	4.86468	0.0388037	0.360497	142	86	22	40	43	153	119	133	150	81	90
	ENSMUSG00000008668.16	Rps18	0.562234	8.49118	24.9346	8.57175e-06	0.00742892	2404.56	2287.5	796.05	1752.6	1974.01	2139.66	2626.04	2762.9	3376.22	1965.17	2830.59
	ENSMUSG00000008682.14	Rpl10	-0.328389	8.30241	3.97022	0.0579473	0.419528	2306.6	1555.34	680.17	1758.83	1935.13	2476.78	1241.53	2574.65	869.9	1963.61	689.78
	ENSMUSG00000008683.17	Rps15a	-0.111707	7.22123	0.917195	0.343105	0.708634	1091.87	937.41	253.5	749.05	782.21	1069.99	749.03	1213.65	485.5	879.72	427.43
	ENSMUSG00000008690.16	Ncaph2	-0.142482	6.28742	2.11976	0.152046	0.590815	571.07	553.4	250.63	481.41	516.74	507.26	441.27	586.66	379.56	469.28	353.42
	ENSMUSG00000008730.18	Hipk1	0.119705	8.03137	1.35694	0.249937	0.628623	2244.83	2028.84	472.39	1358.21	1387.51	2318.81	1542.19	2520.22	1707.08	1634	1192.35
	ENSMUSG00000008734.10	Gprc5b	0.0094812	5.12365	0.00738825	0.931867	1	300.93	288.23	87	194.96	225	310.93	252	314	218	209	171
	ENSMUSG00000008763.17	Man1a2	0.0912502	6.37299	0.964204	0.33115	0.695463	485	539	218	366	398	607	398	583	511	450	383
	ENSMUSG00000008813.14	Tppp2	1.03348	-1.32049	1.03833	0.313417	0.676574	0	1	0	1	0	0	2	0	1	1	0
	ENSMUSG00000008822.16	Acyp1	0.619164	1.6026	5.34502	0.0252047	0.309958	15	16	4	12	11	20	22	20	21	12	22
	ENSMUSG00000008843.5	Cldn13	-1.36606	-0.820475	3.98679	0.0523542	0.409096	4	3	0	5	6	9	2	0	2	4	0
	ENSMUSG00000008845.10	Cd163	0.747713	5.09041	7.73323	0.0117679	0.223416	263	146	88	100	162	212	267	267	361	200	240
	ENSMUSG00000008855.18	Hdac5	-0.145288	6.50332	1.78175	0.188354	0.617516	565	539	301	517	488	525	467	556	419	400	438
	ENSMUSG00000008859.9	Rala	0.297972	5.27776	6.43148	0.0145887	0.242868	262	265	68	187	175	281	226	282	298	194	222
	ENSMUSG00000008874.4	Clec3a	-0.12824	1.46807	0.174671	0.677894	0.950016	20	10	4	11	16	26	9	17	8	20	11
	ENSMUSG00000008892.13	Vdac3	0.0163531	6.20869	0.0285983	0.866434	1	568.69	518.55	197.73	483.38	511.81	549.77	382.04	628.47	473.63	517.11	392.71
	ENSMUSG00000008932.11	Slc1a7	-0.62538	-0.532337	0.988721	0.325139	0.689722	3	4	2	1	3	2	2	2	0	3	1
	ENSMUSG00000008958.15	Vps72	0.125832	4.93447	0.918332	0.342809	0.708318	207	246	97	138	162	197	208	221	223	125	176
	ENSMUSG00000008976.17	Gabpa	0.121395	5.67187	1.49528	0.227485	0.628623	362	259.12	102.18	251	272	358.72	248	388	292.61	306	211
	ENSMUSG00000008999.8	Bmp7	0.0237211	4.51494	0.0259913	0.872611	1	104	98	30	102	91	110	109	130	72	101	45
	ENSMUSG00000009013.6	Dynll1	-0.0744625	6.99119	0.428539	0.515892	0.848811	753	767	216	469	479	715	566	839	439	573	284
	ENSMUSG00000009030.15	Pdcl	0.293243	4.73746	6.77383	0.0123312	0.226422	166	163	57	147	138	165	159	182	187	169	146
	ENSMUSG00000009035.16	Tmem184b	-0.155689	6.16751	1.35575	0.252019	0.628623	713	723	178	494	457	651	492	709	408	538	247
	ENSMUSG00000009047.5	Gm5965	0.144362	-0.00599691	0.00952175	0.922818	1	0	0	1	0	0	0	1	0	0	0	0
	ENSMUSG00000009070.15	Rsph14	-1.9309	-1.50601	2.85452	0.119679	0.532525	0	0	0	1	1	0	0	0	0	0	0
	ENSMUSG00000009073.17	Nf2	0.361983	6.48145	11.4949	0.00142106	0.0846457	744	671	204	466	425	575	641	664	713	543	624
	ENSMUSG00000009075.3	Cabp7	-0.499335	0.406933	1.48496	0.229071	0.628623	8.37	7.2	7.22	8.53	5.36	10.48	3.21	4.23	5.22	10.37	5.1
	ENSMUSG00000009076.11	Zmat5	-0.270998	2.58624	1.95885	0.168192	0.617516	53.63	39.8	26.78	39.47	36.64	53.52	37.79	44.77	30.78	27.63	33.9
	ENSMUSG00000009079.17	Ewsr1	0.27815	7.32374	8.34902	0.00581766	0.16166	1243.66	1171.78	360.69	911.5	845.14	1335.96	1133.85	1331.67	1246.95	960.18	1054.02
	ENSMUSG00000009090.18	Ap1b1	-0.234102	7.02944	5.17071	0.0275726	0.32142	943	862	405	743	820	921	767	1067	515	676	436
	ENSMUSG00000009092.6	Derl3	-0.321182	0.423334	0.639827	0.427791	0.784648	5	6	2	7	7	9	6	7	3	5	3
	ENSMUSG00000009093.8	Gstt4	-0.270456	-1.37252	0.060969	0.807091	1	0	2	0	0	0	1	0	2	0	0	0
	ENSMUSG00000009097.11	Tbx1	-0.115933	4.89302	0.72616	0.398445	0.761599	167	163	87	150	150	144	164	177	100	154	92
	ENSMUSG00000009108.16	Gnat2	0.107349	-0.188414	0.0406986	0.84099	1	4	4	3	2	1	5	2	3	7	1	4
	ENSMUSG00000009112.5	Bcl2l13	-0.0467373	6.35734	0.239674	0.626715	0.925481	554	453	196	375	401	548.3	373	610.39	349	444	292
	ENSMUSG00000009114.18	2610028H24Rik	-0.562412	-1.55877	0.249372	0.620468	0.921042	0	0	0	0	0	2.19	1	0	0	0	0
	ENSMUSG00000009115.6	Spatc1l	0.856657	-1.50564	0.623993	0.458672	0.803312	0	0	0	1	0	0	1	0	0	1	0
	ENSMUSG00000009145.7	Dqx1	-0.333959	0.78317	0.654364	0.422626	0.78031	7	9	7	5	5	10	9	7	7	4	2
	ENSMUSG00000009185.3	Ccl8	-1.03406	5.85938	13.9297	0.00138611	0.0840228	461	464	216	398	551	554	248	437	113	276	75
	ENSMUSG00000009207.16	Lnpk	0.0684745	5.16166	0.238418	0.627828	0.926171	215	174	55	142	197	325	139	280	164	247	122
	ENSMUSG00000009210.11	Prr29	-1.10698	-0.296855	3.33639	0.0741078	0.449283	2	4	1	9	2	6	3	2	1	2	1
	ENSMUSG00000009214.10	Mymk	0.798858	-0.733803	1.0732	0.305516	0.667488	2	1	2	1	0	1	3	3	0	5	0
	ENSMUSG00000009216.8	Fam163b	-0.545335	-1.47633	0.197868	0.670373	0.946974	0	0	0	2	0	0	0	1	0	0	0
	ENSMUSG00000009246.15	Trpm5	-0.48465	-0.593616	0.607178	0.439752	0.794646	5	4	1	2	5	2	1	1	4	4	1
	ENSMUSG00000009248.7	Ascl2	-0.419064	0.734114	1.18823	0.281235	0.640409	10	6	3	4	11	7	6	12	2	3	3
	ENSMUSG00000009281.7	Rarres2	-0.256454	6.16144	3.95162	0.0538413	0.414293	743.31	714.32	216.84	435.42	475.05	606.13	443.23	550.12	442.4	476.16	291.45
	ENSMUSG00000009291.14	Pttg1ip	0.11439	6.83158	1.2623	0.266913	0.628623	860	768	415	670	754	819	792	901	908	731	629
	ENSMUSG00000009292.19	Trpm2	-0.298086	3.38415	3.17969	0.0810068	0.462189	83	105	43	86	99	105	73	98	66	63	59
	ENSMUSG00000009293.18	Ube2g2	0.348309	5.62338	7.214	0.0102092	0.209919	358.91	303	166	295	282.9	272	339	373	422	286	379
	ENSMUSG00000009350.14	Mpo	-0.74408	3.70954	2.6269	0.121364	0.535649	263.83	128.77	49	105.8	189.37	183.52	43	114	36.75	240.74	22
	ENSMUSG00000009356.13	Lpo	-1.55801	-1.03013	1.93401	0.17086	0.617516	0	2	0	0	2	1	1	0	0	0	0
	ENSMUSG00000009376.16	Met	-0.000395749	5.67515	1.02243e-05	0.997462	1	355	328	80	267	305	479	221	468	274	330	193
	ENSMUSG00000009378.5	Slc16a12	-0.122057	1.15518	0.123899	0.726415	0.980212	21	8	4	4	10	17	5	13	7	15	8
	ENSMUSG00000009394.14	Syn2	-0.825311	0.776805	6.2113	0.0162708	0.254195	14	14	7	15	12	11	7	9	10	7	2
	ENSMUSG00000009406.14	Elk1	-0.0421824	4.08519	0.109322	0.742384	0.990873	150	126	50	101	94	147	110	153	101	101	77
	ENSMUSG00000009418.17	Nav1	-0.0709253	7.06935	0.504969	0.480831	0.820606	1291.92	1222.98	335.8	812.49	798.75	1255.45	937.83	1126.99	739.07	978.07	635.99
	ENSMUSG00000009470.18	Tnpo1	0.155563	7.63322	1.7925	0.187125	0.617516	1680.41	1371.04	291.79	996.97	1125.25	1894.18	1089.94	1772.66	1317.58	1290.14	1006.72
	ENSMUSG00000009471.5	Myod1	0.0234664	2.55358	0.0101665	0.920115	1	53	51	16	38	41	29	32	28	25	71	34
	ENSMUSG00000009487.11	Otog	-0.91751	-1.4237	0.656447	0.421894	0.77971	2	0	0	0	1	0	0	0	0	0	1
	ENSMUSG00000009535.14	Rnmt	0.258252	5.13014	4.81005	0.0332689	0.340618	212	199	68	223	227	269	201	260	250	242	217
	ENSMUSG00000009545.15	Kcnq1	0.257918	0.326164	0.378274	0.54149	0.86963	8	5	3	12	3	6	7	5	6	14	5
	ENSMUSG00000009549.15	Srp14	-0.101111	4.5661	0.393673	0.534201	0.863927	174	148	95	162	152	150	143	157	143	125	135
	ENSMUSG00000009551.3	6330409D20Rik	0.161325	0.525924	0.168045	0.683715	0.953279	5	5	3	7	13	11	4	13	12	9	4
	ENSMUSG00000009555.17	Cdk9	-0.202006	5.67514	3.40584	0.0712605	0.449283	389	411	197	337	389	386	290	478	280	329	220
	ENSMUSG00000009563.17	Tor2a	-0.201965	4.2023	2.7384	0.104615	0.520256	134	135	45.47	112	129	141.99	98	147	81	106	76
	ENSMUSG00000009566.13	Fpgs	0.0912745	4.31164	0.429901	0.515229	0.848364	135	131	79	102	122	107	139	171	105	136	80
	ENSMUSG00000009569.15	Mrtfb	0.0127516	6.23526	0.0107891	0.917738	1	661	484	121	383	369	675	448	658	349	464	278
	ENSMUSG00000009575.15	Cbx5	0.282229	7.34956	8.13586	0.00642739	0.171004	1227	1170	422	810	925	1222	975	1186	1275	1128	1130
	ENSMUSG00000009580.16	Odam	1.3889	-1.56449	1.96819	0.208944	0.617516	0	0	0	0	0	0	0	1	0	0	0
	ENSMUSG00000009585.19	Apobec3	-0.368029	7.1144	7.97044	0.00776485	0.185006	1275.5	1327.94	414.8	1048.87	1115.07	1290.64	801.7	1330.6	758.89	853.74	500.72
	ENSMUSG00000009588.10	St6galnac1	0.154425	-1.56343	0.0191752	0.896562	1	0	0	0	1	0	0	1	0	0	0	0
	ENSMUSG00000009596.10	Taf7l	1.35553	-1.37136	1.30877	0.258401	0.628623	0	0	0	0	0	1	0	0	3	0	0
	ENSMUSG00000009614.17	Sardh	-0.386808	2.83577	3.29365	0.075922	0.449885	58.39	60	51	43	62	58	46	45	28.72	51	50
	ENSMUSG00000009621.19	Vav2	-0.183917	4.6337	2.07395	0.15645	0.598705	199	212	107	188	203	226	175	201	135	179	157
	ENSMUSG00000009628.15	Tex15	-0.645164	1.40268	3.366	0.0728787	0.449283	21	16	7	9	11	10	5	14	2	15	4
	ENSMUSG00000009630.11	Ppp2cb	-0.0251371	4.95713	0.050473	0.823215	1	224	213	82	172	191	240	148	219	173	209	163
	ENSMUSG00000009633.4	G0s2	-0.0725787	1.46743	0.0603767	0.80697	1	25	22	8	11	24	11	23	18	14	12	13
	ENSMUSG00000009640.12	Dmap1	0.0610589	3.81648	0.165193	0.686261	0.954756	80	98	54	81	90	104	84	131	64	102	76
	ENSMUSG00000009646.14	Pla2g12b	-0.174042	-1.32118	0.030205	0.89176	1	1	0	1	0	1	1	0	2	0	0	1
	ENSMUSG00000009647.14	Mcu	0.070997	5.27985	0.343816	0.560436	0.880818	320.98	257.96	68.85	169	206.98	350	221	327	216	237	166
	ENSMUSG00000009654.5	Oit3	-1.74963	-0.564463	5.22785	0.026771	0.317832	8	1	1	3	3	2	0	1	0	2	1
	ENSMUSG00000009670.12	Tex11	0	-1.56362	0	1	1	0	0	0	0	0	0	0	0	0	0	0
	ENSMUSG00000009681.11	Bcr	-0.0347865	6.13398	0.125544	0.72468	0.9789	568	628	207	495	421	502	450	556	448	471	369
	ENSMUSG00000009687.15	Fxyd5	-0.177658	6.46294	0.887701	0.35685	0.724504	862	831	188	513	517	849	603	885	414	511	315
	ENSMUSG00000009731.5	Kcnd1	-0.444886	1.57939	2.38402	0.129278	0.547793	19	24	6	23	19	27	18	18	12	18	6
	ENSMUSG00000009733.10	Tfcp2	0.245127	3.75594	2.60783	0.11302	0.532525	82	87	42	73	51	82	89	94	103	69	62
	ENSMUSG00000009734.19	Pou6f2	-1.24075	-1.59396	1.50868	0.271182	0.628623	1	0	0	0	0	0	0	0	0	0	0
	ENSMUSG00000009739.18	Pou6f1	0.142797	4.50151	1.22345	0.274304	0.63251	175	176	80	128	119	182	172	179	140	123	172
	ENSMUSG00000009741.16	Ubp1	0.238362	6.55164	6.24906	0.0159682	0.252057	629.64	701.24	225.71	510.1	554.46	683.51	584.42	751.59	745.08	585.12	537.96
	ENSMUSG00000009772.16	Nuak2	-0.0823399	5.59579	0.42996	0.5152	0.848357	278	304	168	329	286	247	286	349	268	261	177
	ENSMUSG00000009828.16	Cilk1	0.0187806	4.45568	0.0183756	0.89275	1	214	165	39	101	104	210	120	187	132	141	98
	ENSMUSG00000009863.15	Sdhb	-0.400643	5.38637	6.6218	0.0151113	0.246872	332	270	146	306	335	321	226	326	138	267	162
	ENSMUSG00000009876.14	Cox4i2	-0.181425	-0.683029	0.0657674	0.79872	1	3	1	3	3	1	1	3	1	3	0	2
	ENSMUSG00000009894.16	Snap47	-0.415925	3.58124	6.31102	0.0154846	0.24925	83.18	66	44	70	91	82	53	75	44	72	38
	ENSMUSG00000009900.8	Wnt3a	-0.667192	2.0751	4.00008	0.0527101	0.410441	8	19	17	15	27	24	19	16	3	10	12
	ENSMUSG00000009905.6	Kdsr	0.0752005	5.52942	0.540396	0.465915	0.808562	307	262	84	216	244	279	238	328	248	228	172
	ENSMUSG00000009907.18	Vps4b	0.0437607	6.68708	0.252283	0.617814	0.919537	655	649	211	504.92	527	727.97	490	731	530	581	448
	ENSMUSG00000009927.10	Rps25	-0.0421732	7.54841	0.0452289	0.833719	1	1453.81	1121.05	206.69	795.49	802.79	1653.67	780.93	1721.94	669.89	1091.8	479.9
	ENSMUSG00000009941.11	Nxf2	-0.503265	-1.11216	0.374936	0.543272	0.870187	1	2	0	1	4	1	1	0	1	2	1
	ENSMUSG00000009995.18	Taz	0.11184	5.22483	0.997461	0.323032	0.687381	279	207	97	186	175	225	216	270	212	171	186
	ENSMUSG00000010021.14	Kif19a	-0.324402	1.4216	1.58909	0.213668	0.623556	34	26	11	20	18	20	21	19	15	12	18
	ENSMUSG00000010025.20	Aldh3a2	-0.206374	5.57972	4.27596	0.044175	0.377417	381	315	144	279	303	336	252	339	242	238	213
	ENSMUSG00000010044.13	Zmynd10	0.134067	-0.783966	0.0352223	0.851937	1	0	3	0	1	4	2	3	1	1	2	2
	ENSMUSG00000010045.3	Tmem115	-0.0129172	5.06093	0.0104336	0.919075	1	193	239	130	218	173	216	235	266	176	193	143
	ENSMUSG00000010047.13	Hyal2	-0.348905	4.15964	5.69608	0.0210733	0.287325	129	129	56	116	118	112	88	145	61	103	52
	ENSMUSG00000010048.11	Ifrd2	0.0767445	4.83563	0.192442	0.664191	0.946974	201.78	200.12	113.15	150.1	182.38	152.19	182.72	166.48	198.15	197.54	154.89
	ENSMUSG00000010051.16	Hyal1	-0.070181	4.62081	0.232205	0.632127	0.929055	205.92	135.82	41.73	141.39	127.24	145.47	126.8	175.52	102.86	129.13	92.43
	ENSMUSG00000010054.5	Tusc2	-0.190622	3.84046	1.70047	0.198567	0.617516	102.78	99.69	45.58	98.06	89.3	87.99	101.54	107.24	57.2	80.39	46.83
	ENSMUSG00000010057.9	Nprl2	0.0841111	2.71012	0.181179	0.672302	0.947465	41	32	13	32	26	38	34	47	34	19	27
	ENSMUSG00000010064.16	Slc38a3	0.143779	3.06306	0.202089	0.657585	0.946719	85	43	15	32	38	80	61	93	36	26	48
	ENSMUSG00000010066.16	Cacna2d2	-0.526305	-0.1876	0.975419	0.328382	0.692879	7	1	3	8	4	2	3	6	2	3	1
	ENSMUSG00000010067.14	Rassf1	-0.0512524	5.40148	0.191525	0.663652	0.946974	291.39	245.95	167.52	283.42	301.39	312.34	258.57	375.4	242.46	287.88	192.02
	ENSMUSG00000010080.16	Epn3	0.0135082	5.02875	0.00761181	0.930846	1	77	61	46	66	57	69	70	94	59	68	39
	ENSMUSG00000010086.18	Rnf112	-2.27329	-1.07178	3.90654	0.0539734	0.414602	3	0	0	1	0	5	0	0	0	1	0
	ENSMUSG00000010095.14	Slc3a2	-0.253999	6.93163	5.83453	0.0196492	0.278943	928	1179	382	831	795	885	748	1050	648	675	459
	ENSMUSG00000010097.16	Nxf1	-0.0458719	6.69232	0.251312	0.618489	0.919826	801	750	278	561	573	799	614	885	557	606	405
	ENSMUSG00000010110.18	Stx5a	0.189916	5.87748	3.42796	0.0703794	0.449283	459	401	111	333	282	437	382	461	420	325	283
	ENSMUSG00000010122.15	Slc47a1	0.193786	1.71329	0.42479	0.517726	0.850738	29	25	2	9	16	32	12	34	22	10	25
	ENSMUSG00000010136.15	Pifo	0	-1.59383	0	1	1	0	0	0	0	0	0	0	0	0	0	0
	ENSMUSG00000010142.13	Tnfrsf13b	0.127466	3.95164	0.466499	0.499375	0.836441	124	150	49	92	110	141	96	116	186	92	104
	ENSMUSG00000010154.8	Spire2	0.0203206	1.42367	0.0040544	0.949499	1	11	16	8	22	19	13	15	11	15	12	22
	ENSMUSG00000010175.14	Prox1	-0.120351	3.93988	0.590411	0.446098	0.800252	160	108	23	95	117	167	90	163	71	101	76
	ENSMUSG00000010205.12	Raver1	-0.345726	6.04272	6.24118	0.0174556	0.262589	600.97	581.47	196.98	431.7	444.34	550.17	468.91	584.91	236.27	425.29	167.13
	ENSMUSG00000010277.8	2610507B11Rik	-0.075085	8.48498	0.678946	0.414105	0.773813	3075	2683	883	2067	2270	3034	1960	3410	1880	2283	1552
	ENSMUSG00000010290.8	AI597479	0.21049	4.14708	1.86727	0.17828	0.617516	133	100	17	90	77	140	98	132	108	91	85
	ENSMUSG00000010307.8	Tmem86a	-0.410933	4.8655	12.1024	0.00109529	0.0756381	229	284	107	237	264	260	187	241	145	161	146
	ENSMUSG00000010311.16	Optc	0.0592074	0.586491	0.0150107	0.926029	1	4	2	0	7	1	7	5	4	2	5	2
	ENSMUSG00000010342.17	Tex14	-0.11788	1.64084	0.165414	0.686064	0.954673	28	25	2	31	19	22	19	28	17	17	15
	ENSMUSG00000010358.14	Ifi35	0.133413	6.31189	0.731145	0.400343	0.762832	608.15	641.71	298.76	555.77	558.22	505	584.96	739	689.98	440.82	523
	ENSMUSG00000010362.10	Rdm1	-0.0627368	2.54459	0.0864974	0.769971	1	46	30	12	35	33	35	32	19	28	39	30
	ENSMUSG00000010376.16	Nedd8	0.310385	4.94673	5.01321	0.0300213	0.328195	239.99	259.96	65	147.98	159.92	208	225	196	286	157	204
	ENSMUSG00000010392.9	Gosr1	-0.0484868	5.46264	0.241179	0.625637	0.924627	324	328	97	263	257	359	224	360	254	250	209
	ENSMUSG00000010406.13	Mrpl52	-0.313645	4.78564	1.81934	0.191975	0.617516	174	170	152	183	213	154	167	179	117	180	117
	ENSMUSG00000010453.13	Kansl3	-0.0350028	6.45042	0.143687	0.706347	0.966778	674	735	281	594	603	639	600	753	523	556	474
	ENSMUSG00000010461.17	Eya4	-0.149426	3.63002	0.685883	0.411747	0.772392	129	67	26	48	55	117	43	110	67	66	42
	ENSMUSG00000010476.15	Ebf3	-0.0574378	4.06728	0.14145	0.708534	0.968186	165	141	38	80	98	187	94	122	105	132.78	90
	ENSMUSG00000010492.11	Uckl1os	0.328129	3.02004	2.92057	0.0940424	0.493069	68.88	54.71	30	47	37	58	76	73	69	33	59
	ENSMUSG00000010505.17	Myt1	-1.23818	-1.56442	1.5354	0.271182	0.628623	0	0	0	0	0	1	0	0	0	0	0
	ENSMUSG00000010517.8	Faf1	-0.207435	5.70966	3.73525	0.0593042	0.423547	316	309	116	247	300	342	187	353	223	271	160
	ENSMUSG00000010529.7	Gm266	-0.17389	0.47801	0.190274	0.664683	0.946974	13	15	0	9	7	12	3	5	9	14	8
	ENSMUSG00000010538.15	Tsacc	0.660704	0.287525	2.12835	0.151237	0.589095	11	4	1	7	0	5	7	5	7	11	6
	ENSMUSG00000010554.15	Mettl16	0.223183	5.04328	4.15316	0.0471976	0.388733	218	198	89	169	172	242	180	277	245	176	184
	ENSMUSG00000010592.10	Dazl	-1.024	-1.07144	1.21928	0.275113	0.633627	4	2	1	1	0	0	1	1	0	1	0
	ENSMUSG00000010601.15	Apol7a	0.248842	3.18764	1.57822	0.215216	0.625915	42	36.81	8	32	27	39	26.6	63.67	34	33	26
	ENSMUSG00000010607.9	Pigyl	-0.0642282	2.35344	0.0934789	0.772531	1	37	39	18	28	29	29	36	34	21	29	25
	ENSMUSG00000010608.16	Rbm25	0.0738708	7.42403	0.500411	0.482807	0.821968	1203	1082.69	302	854.26	860	1586.49	760.74	1242	1028.46	1121.67	801
	ENSMUSG00000010609.16	Psen2	-0.364002	5.19071	7.2805	0.00979932	0.206137	301	343	178	347	289	318	239	266	247	206	223
	ENSMUSG00000010651.5	Acaa1b	0.187705	0.35001	0.232732	0.672511	0.947644	5.62	8.8	2.16	4.52	4.52	16.25	8.33	7.63	5.61	7.78	8.94
	ENSMUSG00000010660.4	Plcd1	-0.0237079	5.12393	0.0356118	0.851131	1	196	212	68	141	151	176	169	153	148	170	122
	ENSMUSG00000010663.6	Fads1	-0.0790891	4.7952	0.407551	0.526309	0.858008	294	277	78	187	194	279	203	244	174	196	185
	ENSMUSG00000010721.16	Lmbr1	0.140676	4.40229	1.16518	0.285894	0.645253	131	100	28	98	80	144	109	149	90	99	77
	ENSMUSG00000010751.16	Tnfrsf22	-0.0093994	2.43418	0.0017626	0.96669	1	32.5	33.96	10	31.67	27.48	48.23	20.53	58.49	17	38.21	20
	ENSMUSG00000010755.18	Cars	-0.0403871	5.18109	0.138394	0.711553	0.970202	249	218	101	186	227	223	175	289	190	210	138
	ENSMUSG00000010760.6	Phlda2	-0.252444	-0.990454	0.0577061	0.811202	1	0	0	0	1	0	2	1	1	0	0	0
	ENSMUSG00000010797.7	Wnt2	-0.220811	1.70244	0.622105	0.43422	0.789937	30	20	5	13	25	32	20	17	12	31	7
	ENSMUSG00000010803.14	Gabra1	-0.829397	-1.34627	0.697689	0.40778	0.768916	2	0	0	1	0	2	1	0	1	0	0
	ENSMUSG00000010825.18	Grid2ip	0.174016	1.13497	0.166781	0.684841	0.953967	6	8	1	5	3	7.11	7	6	10	3	2
	ENSMUSG00000010830.9	Kdelr3	-0.540238	3.14728	7.95838	0.0069867	0.178073	106	76	17	42	66	116	50	75	38	41	31
	ENSMUSG00000010911.13	Apip	-0.0995431	2.35207	0.230164	0.633624	0.930519	45	43	14	24	32	50	24	29	44	24	35
	ENSMUSG00000010914.11	Pdhx	0.378755	4.10093	6.84945	0.0118846	0.223794	121	113	45	74	93	136	121	125	156	85	127
	ENSMUSG00000010936.12	Vac14	-0.16153	5.67481	2.32585	0.133931	0.555699	412	434	177	382	346	379	337	450	257	340	243
	ENSMUSG00000011008.14	Mcoln2	0.512619	3.64745	9.55709	0.00334214	0.127181	88	58	25	45	64	70	78	104	71	111	52
	ENSMUSG00000011034.7	Slc5a1	0.573623	4.10805	8.93157	0.00444343	0.145404	30	31	7	18	30	42	39	62	44	32	19
	ENSMUSG00000011096.18	Akt1s1	0.0289845	5.02374	0.0630049	0.802901	1	229	264	119	207	182	219	239	230	205	194	184
	ENSMUSG00000011114.19	Tbrg1	-0.0185536	6.29441	0.0364149	0.849482	1	578.02	635.67	189	385.55	455.31	569.89	435.92	617.03	430.08	512.19	310.64
	ENSMUSG00000011118.5	Panx3	-0.439845	2.41401	3.97736	0.0519249	0.407166	50	43	14	38	36	43	24	41	24	39	11
	ENSMUSG00000011148.15	Adssl1	0.302265	5.66315	3.75473	0.0626538	0.432673	435	287	129	243	274	424	380	481	338	306	311
	ENSMUSG00000011154.18	Cfap161	1.38891	-1.50687	1.90257	0.208944	0.617516	0	0	0	0	0	0	0	1	0	0	0
	ENSMUSG00000011158.9	Brf1	0.129208	5.56338	1.33463	0.253814	0.628623	331.77	317.91	162.37	264.51	305.39	296.55	315.71	349.83	309.51	264.57	310.78
	ENSMUSG00000011171.12	Vipr2	-0.964208	0.822113	7.21347	0.00996329	0.207657	14	16	3	6	11	25	7	11	2	6	5
	ENSMUSG00000011179.9	Odc1	0.3798	7.02492	12.6242	0.0008782	0.0687082	1087.96	1097.14	333.97	749.91	801.05	858.97	984.83	1013.3	1204.29	1036.86	952.18
	ENSMUSG00000011254.17	Thg1l	0.356156	3.03057	3.59648	0.0640479	0.437335	53	66	32	46	31	54	67	51	67	47	67
	ENSMUSG00000011256.17	Adam19	-0.0715795	5.49532	0.442213	0.509301	0.844893	442	459.9	145.42	296.29	270.96	435.69	358	394	304.48	301.37	245
	ENSMUSG00000011257.20	Pabpc4	0.259576	5.72935	4.77845	0.0338254	0.342053	513.69	507.9	152.85	254.21	309.45	377.25	414.77	444.11	419.51	378.78	391.32
	ENSMUSG00000011263.17	Exoc3l2	-0.700283	3.44033	10.8052	0.00233639	0.10785	86	71	69	101	84	87	61	63	53	65	31
	ENSMUSG00000011267.9	Zfp296	0.326806	2.66679	2.14174	0.149985	0.586323	23.35	27.73	12	26	22	29	38.81	47	21	33.47	10.53
	ENSMUSG00000011305.12	Plin5	0.0339538	0.262238	0.00596589	0.938761	1	3	7	1	5	8	9	3	9	6	4	6
	ENSMUSG00000011306.8	Sugp1	-0.0309016	5.1619	0.0952736	0.758939	1	279	229	96	210	214	272	208	254	214	192	185
	ENSMUSG00000011350.16	Gm5893	0	-1.59368	0	1	1	0	0	0	0	0	0	0	0	0	0	0
	ENSMUSG00000011382.9	Dhdh	0.188188	3.50041	1.44652	0.235102	0.628623	99	79.66	17.45	49.79	63	95	70.81	105.82	83.56	51	61
	ENSMUSG00000011427.17	Zfp790	0.160096	4.26864	1.53258	0.221864	0.628623	151	104	46	113	135	121	116	140	119	116	126
	ENSMUSG00000011463.6	Cpb1	1.41834	-1.56385	1.95762	0.208944	0.617516	0	0	0	0	0	0	1	0	0	0	0
	ENSMUSG00000011486.15	Slc25a41	0	-1.59375	0	1	1	0	0	0	0	0	0	0	0	0	0	0
	ENSMUSG00000011589.10	Fsd1	0.512146	-0.700552	0.463346	0.499399	0.836441	1	2	3	1	0	1	1	1	1	4	3
	ENSMUSG00000011632.8	Pinlyp	0.409455	2.62271	1.04027	0.314079	0.677124	6	11	1	6	5	6	6	23	4	7	0
	ENSMUSG00000011658.17	Fuz	0.0127534	3.95335	0.00780519	0.929976	1	117.99	129.37	37.21	92.35	83.26	120.32	88.82	93.86	114.76	73.67	101.08
	ENSMUSG00000011751.17	Sptbn4	0.661192	0.420181	1.07905	0.304216	0.666009	5	0	1	2	2	1	3	5	5	1	1
	ENSMUSG00000011752.8	Pgam1	-0.213243	6.95493	4.22505	0.0454018	0.380916	938.66	857.92	359.69	780.58	792.34	964.02	660.68	1048.16	508.44	814.14	436.53
	ENSMUSG00000011831.17	Evi5	0.0812586	5.53968	0.520202	0.474322	0.815399	315.72	228.82	87	201.56	241.18	388.74	200.67	355.22	219.72	297.61	195.92
	ENSMUSG00000011832.17	Evi5l	-0.00532721	5.04854	0.00169962	0.96729	1	216.11	248.14	108.93	186.69	146.52	179.36	218.7	208.74	181.49	158.38	150.97
	ENSMUSG00000011837.5	Snapc2	-0.302631	3.64697	2.29031	0.138908	0.565362	95	83	49	91	77	75	81	77	44	96	32
	ENSMUSG00000011877.14	Git1	-0.114899	6.48395	1.32958	0.254701	0.628623	684	737	274	583	585	652	581	738	428	645	365
	ENSMUSG00000011884.14	Gltp	0.0473923	7.96545	0.161987	0.689155	0.956467	771	857	264	599	646	943	754	1177	565	692	380
	ENSMUSG00000011958.18	Bnip2	0.25383	6.35759	5.1364	0.0280663	0.322925	578.91	615.79	276.52	536.57	474.83	610.86	540.86	653.93	757.97	510.94	614.86
	ENSMUSG00000011960.13	Ccnt1	0.200753	6.11289	4.26972	0.0443234	0.377904	466.67	404.36	146.94	337.66	384.9	507.96	379.73	608.97	447.57	349.69	353.83
	ENSMUSG00000012017.5	Scarf2	-0.537367	4.7295	14.6439	0.000381918	0.047972	262	295	149	196	249	250	174	187	128	205	134
	ENSMUSG00000012042.10	4930579F01Rik	0	-1.62433	0	1	1	0	0	0	0	0	0	0	0	0	0	0
	ENSMUSG00000012076.9	Brms1l	0.23286	4.00919	2.59884	0.113627	0.532525	112	100	24	80	101	118	88	121	111	88	99
	ENSMUSG00000012114.18	Med15	-0.109631	6.83048	1.20616	0.27768	0.636096	1042.75	1038	342.03	724	667.45	969.05	737.88	991.06	676.57	712.95	561
	ENSMUSG00000012117.14	Dhdds	-0.111675	5.31764	1.26746	0.26595	0.628623	296	329	116	258	267	300	224	306	274	227	183
	ENSMUSG00000012123.18	Crybg2	0.271092	5.74221	4.62974	0.0365832	0.350982	188	233	120	154	160	196	228	294	202	231	149
	ENSMUSG00000012126.17	Ubxn11	0.0421621	2.37397	0.0414663	0.839518	1	36.18	35.08	21.07	35.09	42.17	33.22	41.09	38.27	36.03	41.23	22.05
	ENSMUSG00000012187.14	Mogat1	-0.400847	-1.42968	0.125505	0.738384	0.988061	0	0.81	0	0	0	1	0	1	0	0	0
	ENSMUSG00000012211.14	Tex22	-0.43888	-0.755563	0.391901	0.534326	0.863968	4	2	0	3	2	2	2	5	1	0	0
	ENSMUSG00000012282.3	Wnt8a	0.0898199	-1.47774	0.0100342	0.920634	1	0	0	1	0	0	0	0	1	0	0	0
	ENSMUSG00000012296.17	Tjap1	0.0219189	4.91479	0.032141	0.858488	1	213	274	100	184	178	201	209	209	198	171	185
	ENSMUSG00000012350.16	Ehf	0.631749	4.3977	15.7685	0.000243692	0.0367822	41	42	9	33	33	71	52	73	67	56	41
	ENSMUSG00000012396.13	Nanog	-1.23818	-1.62438	1.50131	0.271182	0.628623	0	0	0	0	0	1	0	0	0	0	0
	ENSMUSG00000012405.17	Rpl15	0.0465871	7.81142	0.235143	0.629985	0.927702	1651.46	1245.04	469.98	1082.64	1153.75	1604.22	1262.51	1873.9	1076.05	1238.31	775.7
	ENSMUSG00000012422.15	Tmem167	0.0456859	5.9278	0.107061	0.745505	0.993137	441	381	75	325	278	594	272	470	330	386	258
	ENSMUSG00000012428.10	Steap4	0.283183	5.9497	6.18569	0.0164795	0.255271	437	480	100	259	322	494	402	485	459	338	338
	ENSMUSG00000012429.10	Mplkip	0.103727	4.34873	0.53017	0.470142	0.811887	124.94	86.96	39.94	94	99.92	147.93	117	186.95	103	78	57
	ENSMUSG00000012443.5	Kif11	-0.193162	5.21958	2.40507	0.12764	0.544735	240	222	101	204	242	277	150	247	152	282	123
	ENSMUSG00000012483.5	Rpa3	-0.308602	2.19548	1.5398	0.220796	0.628623	26	28	18	48	24	34	20	36	17	37	15
	ENSMUSG00000012519.15	Mlkl	0.253568	5.78296	2.01822	0.168919	0.617516	440	607	181	298	358	378	392	442	594	399	389
	ENSMUSG00000012535.15	Tnpo3	0.204656	6.67309	4.96545	0.0306723	0.329925	662.27	669	206.82	507.42	531.21	748.35	562	740.04	669.98	555	578
	ENSMUSG00000012609.20	Ttll5	0.0722537	4.48751	0.362549	0.549983	0.874139	162	161	47	109	123	172	114	147	126	137	133
	ENSMUSG00000012640.17	Zfp715	0.139531	4.47223	0.529994	0.472834	0.81397	176	112	25	98	120	223	92	275	108	124	86
	ENSMUSG00000012705.17	Retn	-0.63658	1.61094	3.10987	0.0851994	0.471637	16	28	3	13	17	15	0	12	13	11	12
	ENSMUSG00000012777.15	Acp4	0.270322	-0.776674	0.106346	0.745842	0.993281	1	4	2	1	0	2.01	2	0	4	1	3
	ENSMUSG00000012819.17	Cdh23	-0.296062	2.79784	2.05995	0.157826	0.601646	61	47	22	48	48	60	52	39	52	32	19
	ENSMUSG00000012848.16	Rps5	0.026651	8.38702	0.0836695	0.773655	1	2209	2145	737	1629	1781	2326	1883	2754	1485	1933	1212
	ENSMUSG00000012889.9	Podnl1	-0.512239	2.66555	5.81676	0.0198261	0.279964	61	78	38	51	46	44	27	50	27	34	52
	ENSMUSG00000013033.17	Adgrl1	-0.0231931	5.76846	0.0423352	0.837869	1	521.51	427.12	220.5	290.54	305.91	397.47	356.11	411.95	383.97	339.44	306.82
	ENSMUSG00000013076.18	Amotl1	0.189455	7.75718	4.31757	0.0431991	0.374657	1708	1348	472	978	998	1453	1261	1611	1243	1289	1069
	ENSMUSG00000013083.9	2200002J24Rik	-0.499245	-1.50583	0.205965	0.670373	0.946974	0	1	0	1	0	0	1	0	0	0	0
	ENSMUSG00000013089.16	Etv5	0.0546153	4.92338	0.253352	0.617072	0.919193	249.8	217.54	71.63	200.75	189.37	266.16	191.9	298.9	208.7	187.43	144.57
	ENSMUSG00000013091.6	Tmem190	1.27185	-0.348335	3.78916	0.0575666	0.41862	2	1	0	1	2	0	3	4	3	2	1
	ENSMUSG00000013150.16	Gfod2	0.0126684	3.43931	0.00616354	0.937757	1	63	56	35	52	68	61	54	72	61	56	46
	ENSMUSG00000013155.11	Enkd1	-0.100412	2.47063	0.253742	0.645381	0.939152	39	35	21	34	39	46	37	41	39	33.82	19
	ENSMUSG00000013158.7	4933405L10Rik	1.33556	-1.17499	1.85945	0.179173	0.617516	0	1	0	1	0	0	1	2	0	1.18	1
	ENSMUSG00000013160.8	Atp6v0d1	-0.431576	5.9557	11.1457	0.0017624	0.0941155	447	401	160	384	411	480	281	523	205	328	132
	ENSMUSG00000013236.18	Ptprs	-0.233174	7.47873	5.20367	0.0271072	0.31934	1507	1323	538	1050	964	1311	1044	1282	706	1093	679
	ENSMUSG00000013275.10	Slc41a1	0.192054	5.54683	3.21247	0.0795063	0.457696	379	400	137	221	222	324	320	421	285	326	250
	ENSMUSG00000013338.17	Fer1l4	1.05024	-1.09035	0.945779	0.335767	0.700067	0	2	0	0	0	0	0	1	1	0	2
	ENSMUSG00000013353.11	4931406B18Rik	0.176489	-1.53505	0.0223397	0.896562	1	1	0	0	0	0	0	0	0	1	0	0
	ENSMUSG00000013367.6	Iglon5	0.0675152	0.759883	0.0321543	0.858459	1	12	11	2	5	9	9	12	9	5	8	7
	ENSMUSG00000013415.10	Igf2bp1	-0.298624	-0.0207831	0.317987	0.575497	0.890522	8	6	3	5	0	6	2	6	5	4	2
	ENSMUSG00000013418.9	B4galnt2	-0.0815376	-1.02775	0.00784163	0.953418	1	1	1	1	1	1	0	1	1	0	1	1
	ENSMUSG00000013419.8	Zfp651	0.0632573	4.96526	0.21265	0.646856	0.940391	304	266	93	146	211	286	245	249	171	195	239
	ENSMUSG00000013465.20	Nelfb	-0.0862929	5.70654	0.296472	0.590468	0.899849	362	405	278	326	327	323	326	383	381	268	327
	ENSMUSG00000013483.15	Card14	0.847178	5.67108	41.8637	7.16282e-08	0.000827712	290.42	264.16	111.16	155.01	164.69	213.62	353.12	413.36	326.51	397.66	307.64
	ENSMUSG00000013495.16	Tmem175	-0.270886	3.97014	3.08865	0.0853415	0.471931	114.72	108.14	33	87.23	89.94	140.06	69.62	147.64	59.3	81.73	42.89
	ENSMUSG00000013523.14	Bcas1	0.248084	0.912846	0.714367	0.402273	0.764729	16	7	6	9	9	16	9	15	9	15	14
	ENSMUSG00000013539.15	Tango2	-0.0396279	4.31687	0.0944418	0.75996	1	172	152	47	112	130	177	125	168	107	146	87
	ENSMUSG00000013562.13	4833413E03Rik	-2.01924	-1.13493	3.48987	0.0679763	0.448949	3	1	0	3	0	0	0	1	0	0	0
	ENSMUSG00000013584.6	Aldh1a2	0.372325	4.35948	3.4859	0.0734385	0.449283	238	199	43	83	92	144	176	175	157	183	130
	ENSMUSG00000013593.13	Ndufs2	0.15464	6.17307	2.02543	0.161278	0.608251	497	512	231	417	449	479	469	532	545	406	461
	ENSMUSG00000013611.15	Snx31	0.880698	-1.50608	0.5634	0.458672	0.803312	1	0	0	0	0	0	0	0	2	0	0
	ENSMUSG00000013622.16	Atraid	-0.103491	4.47113	0.776608	0.382658	0.749299	175	150	52	119	162	169	121	167	127	126.81	96
	ENSMUSG00000013629.17	Cad	-0.0932459	6.2467	0.678192	0.414362	0.773919	632	648	246	428	522	550	513	616	385	532	347
	ENSMUSG00000013643.14	Lypd8	0.16855	-1.39425	0.0164431	0.898513	1	0	0	0	1	0	0	0	0	0	0	1
	ENSMUSG00000013646.18	Sh3bp5l	0.147829	5.2906	1.32292	0.255879	0.628623	218	228	117	190	199	216	217	225	246	200	204
	ENSMUSG00000013653.3	1810065E05Rik	-0.907222	-1.4782	0.668036	0.418341	0.77685	0	2	0	0	0	1	0	0	0	0	1
	ENSMUSG00000013662.7	Atad1	0.402347	6.15701	13.2617	0.000672725	0.0616967	452	495	135	347	358	525	417	545	617	392	478
	ENSMUSG00000013663.8	Pten	0.128269	7.92649	1.77512	0.189163	0.617516	1684.18	1370.69	458.64	1120.93	1255.98	2024.36	1168.52	1794.5	1333.52	1642.56	1072.34
	ENSMUSG00000013698.13	Pea15a	-0.100722	6.2639	1.13871	0.291368	0.651709	645	610	249	487	524	562	467	608	427	493	415
	ENSMUSG00000013701.14	Timm23	0.00511635	5.89586	0.00250025	0.960332	1	375.89	446.91	137.87	339.22	365.91	401.4	324.57	460.17	318.28	370.41	259.37
	ENSMUSG00000013707.4	Tnfaip8l2	-0.475508	4.03837	10.0099	0.002727	0.115996	148	173	61	147	131	150	100	147	88	97	64
	ENSMUSG00000013736.17	Trnt1	0.0938956	4.97608	0.579831	0.450177	0.803312	215.63	228.67	59	156.74	178.08	225.69	136.04	246.23	176.17	218.89	152.4
	ENSMUSG00000013766.12	Ly6g6e	0.109438	2.86402	0.182879	0.726056	0.979957	15	10	1	12	20	21.37	15	14	13	17.94	10
	ENSMUSG00000013787.16	Ehmt2	-0.209065	6.91516	3.80339	0.0571175	0.417334	911	971	537	807	838	823	801	954	654	728	578
	ENSMUSG00000013822.8	Elof1	-0.221988	4.65872	3.26762	0.0770515	0.451261	184	218	89	159	148	183	160	164	120	146	118
	ENSMUSG00000013833.16	Med16	-0.282109	4.97523	6.39593	0.0148472	0.244391	284	265	89	195	212	258	211	242	133	181	125
	ENSMUSG00000013846.11	St3gal1	0.108382	7.20334	1.29126	0.261567	0.628623	1393	1384	417	827	893	1406	1249	1425	1000	1055	831
	ENSMUSG00000013858.15	Tmem259	0.0503933	6.37923	0.199442	0.657219	0.946719	556.76	640.74	293	464.9	432.21	508	591.8	620.42	499.43	403.3	448
	ENSMUSG00000013878.19	Rnf170	0.177052	4.71736	2.17936	0.146531	0.580494	169.51	123.58	55	131.85	120.5	188.13	125.07	199.89	145.74	167.7	105
	ENSMUSG00000013921.16	Clip3	-0.327786	3.35093	3.23136	0.0786559	0.455758	108	101	22	80	63	82	72	79	36	78	34
	ENSMUSG00000013928.14	1700020L13Rik	-0.135455	-0.239665	0.065616	0.798946	1	4.19	4.6	1	5.46	5.9	2	1	5.07	2.35	2.23	6.8
	ENSMUSG00000013936.13	Myl2	0.319156	4.07626	0.837688	0.371373	0.739142	167	71	10	41	56	181	104	164	91	89	66
	ENSMUSG00000013973.13	Dedd	0.0487725	4.79196	0.171096	0.681018	0.952008	214.91	206.24	56.42	201.94	152.49	202.2	189.6	232.75	170.97	159.03	130.23
	ENSMUSG00000013974.4	Mcemp1	-0.130628	1.73149	0.151326	0.699731	0.962636	26	15	10	14	34	29	13	36	29	20	3
	ENSMUSG00000013997.11	Nit1	-0.0133205	4.51062	0.00929531	0.923602	1	155.09	152.76	58.58	68.06	123.51	165.8	117.4	180.25	131.03	105.97	68.77
	ENSMUSG00000014030.16	Pax5	-0.547173	2.65449	6.04438	0.0176839	0.26405	73	52.34	13.44	35.56	70.15	79	37	46.63	25.55	54	17.52
	ENSMUSG00000014039.19	Prdm15	0.0926209	4.50206	0.518647	0.47498	0.81568	152	142	43	112	130	143	118	156	142	140	81
	ENSMUSG00000014074.18	Rnf168	-0.0502424	5.31803	0.203348	0.654102	0.94483	265	277	132	240	238	285	196	293	210	254	222
	ENSMUSG00000014075.16	Dynlt2b	0.278026	2.26568	1.78192	0.188334	0.617516	32	29	10	27	25	39	25	45	44	24	25
	ENSMUSG00000014077.14	Chp1	0.019813	6.82523	0.0401864	0.84198	1	865	787	192	560	577.85	866.86	565.87	888.83	609.01	647.8	452.01
	ENSMUSG00000014158.13	Trpv4	-0.108136	3.98509	0.530444	0.470028	0.811881	92	88	34	68	70	116	76	107	56	74	50
	ENSMUSG00000014164.16	Klhl3	-0.114836	1.79939	0.227082	0.6359	0.932307	22	31	14	23	18	38	21	23	21	19	27
	ENSMUSG00000014177.11	Tvp23b	0.364267	3.72671	4.7732	0.0339188	0.342188	75	74	45	71	65	69	103	95	110	58	72
	ENSMUSG00000014195.17	Dnajc7	0.101748	6.55276	1.1008	0.299447	0.660029	650.24	739.68	284.85	569.66	620.62	647.35	596.16	764.42	678	560.4	562.87
	ENSMUSG00000014198.16	Zfp385c	0.519812	1.33569	3.29763	0.0757514	0.449481	20	15	5	10	5	15	22	14	9	18	18
	ENSMUSG00000014226.11	Cacybp	0.254342	5.00346	4.32543	0.0430175	0.374601	241.24	241	56	150	163	239.85	189	312.82	235.04	199.82	132
	ENSMUSG00000014232.15	Cluap1	0.0899361	3.47129	0.297583	0.587977	0.898257	81.84	62.01	29.54	51.84	86.51	70.22	69.64	85.25	68.3	59.24	57.77
	ENSMUSG00000014243.6	Zswim7	0.336358	1.57984	1.46188	0.232669	0.628623	23	11	10	10	18	20	20	17	27	12	20
	ENSMUSG00000014245.9	Pigl	0.0388606	2.19149	0.0308858	0.861249	1	25	26	17	20	23	38	21	32	18	33	25
	ENSMUSG00000014294.5	Ndufa2	-0.000359191	4.82351	1.86143e-06	0.998925	1	198	167	162	201	240	161	215	208	146	217	216
	ENSMUSG00000014301.14	Pam16	-0.0998074	3.28588	0.346213	0.643692	0.937864	86.81	61.76	37.87	84.5	58.68	51.88	60.49	76.05	68.08	57.87	43.84
	ENSMUSG00000014303.14	Glis2	-0.196519	4.7907	2.36896	0.130464	0.549651	280	210.9	100.84	198	190	272.56	228.14	189.79	132	230	127.23
	ENSMUSG00000014313.16	Cox6c	0.225543	4.97864	2.70425	0.106744	0.525264	218	166.76	49	135.28	153.49	324.14	150.16	268.46	216.78	185.62	160.03
	ENSMUSG00000014329.15	Bicc1	0.0813895	6.15475	0.480019	0.491818	0.829595	801.76	627	156	364.91	416.88	678.66	473	608.87	439	642.87	395.98
	ENSMUSG00000014349.8	Ube2z	-0.12139	6.42099	1.66062	0.203817	0.617516	638	662	274	554	541	639	514	737	475	532	347
	ENSMUSG00000014353.16	Tmem87b	0.358306	5.61249	10.1047	0.00261403	0.113418	346	296	67	242	240	357	264	474	331	319	227
	ENSMUSG00000014355.11	Anapc1	0.0597584	7.11755	0.45513	0.503209	0.83929	1060	974	297	772	856	1128	772	1141	888	869	667
	ENSMUSG00000014361.6	Mertk	-0.162755	4.58364	1.34516	0.251974	0.628623	212	234	55	216	196	252	175	243	197	110	130
	ENSMUSG00000014402.16	Tsg101	-0.0894559	5.20014	0.637984	0.428453	0.785249	275.13	225.24	58.45	203.78	173.6	266.35	177.12	262.73	160.27	180.64	141.76
	ENSMUSG00000014418.17	Hps5	0.0802834	5.41663	0.559375	0.458232	0.803312	306	267	125	279	241	357	251	329	304	239	260
	ENSMUSG00000014426.10	Map3k4	0.0204831	5.97016	0.0480568	0.827427	1	432	451.02	145	306	328	442	332	415	361	339	301
	ENSMUSG00000014444.18	Piezo1	-0.32622	7.54186	12.1166	0.00108869	0.0756093	1554.61	1682.66	628.03	1367.63	1322.07	1536.99	1127.92	1616.84	922.26	1126.43	727.43
	ENSMUSG00000014453.5	Blk	-0.747049	0.452331	3.27102	0.0769028	0.451261	15	12	5	3	4	11	3	3	4	10	4
	ENSMUSG00000014470.5	Rnf166	-0.305527	4.32197	4.49561	0.0392803	0.362018	143	150	94	146	145	139	154	144	104	90	85
	ENSMUSG00000014496.9	Ankrd28	0.118203	6.772	1.27671	0.264236	0.628623	861	647	203	578	661	958	549	920	669	804	503
	ENSMUSG00000014498.10	Ankrd52	0.0512014	7.19804	0.337999	0.56376	0.882439	1205.34	1251.42	431.12	922.18	1026.57	1133.34	1078	1302	956	961	846
	ENSMUSG00000014503.16	Pkd2l2	0.303869	1.71311	1.37728	0.246468	0.628623	27.74	11.53	6.38	19.95	15.76	12.74	13.11	39.61	15.96	16.7	14.38
	ENSMUSG00000014504.17	Srp19	0.0827003	4.1022	0.34015	0.562527	0.881844	120	129	30	96	67	122	81	128	124	88	68
	ENSMUSG00000014529.10	Tmbim7	-1.24097	-1.42362	1.31431	0.271182	0.628623	1	0	0	0	0	0	0	0	0	0	0
	ENSMUSG00000014542.4	Clec4f	0.172571	-1.56336	0.0219297	0.896562	1	0	0	0	0	1	0	0	0	0	0	1
	ENSMUSG00000014543.15	Klra17	-1.25802	-0.768598	2.69183	0.107529	0.527705	1	1	1	4	4	4	0	2	0	2	1
	ENSMUSG00000014547.11	Wdfy2	-0.189095	6.63525	3.87266	0.0549848	0.416063	784	760	222	558	614	891	463	850	521	561	384
	ENSMUSG00000014550.15	Rbsn	0.221315	5.76995	5.15243	0.0278345	0.321646	371	346	125	305	295	374	299	404	363	373	304
	ENSMUSG00000014551.9	Mrps25	0.0884063	4.87214	0.544469	0.464249	0.807376	199.49	192.2	62.35	141	148.21	224.21	150.46	188.83	208.59	178.27	115.75
	ENSMUSG00000014554.14	Dguok	-0.11501	3.94953	0.519096	0.47479	0.815599	100	80	16	72	92	127	61	120	73	75	41
	ENSMUSG00000014592.22	Camta1	0.333737	5.54331	9.50903	0.00341552	0.129117	254	215	67	172	161	269	222	350	211	251	153
	ENSMUSG00000014599.11	Csf1	0.0682372	7.63432	0.375324	0.543065	0.870187	1765	2091	607	1233	1356	1487	1553	1794	1444	1561	1069
	ENSMUSG00000014601.14	Strip1	-0.0620282	5.41475	0.337573	0.564005	0.882646	296	279	88	231	255	294	248	334	168	213	185
	ENSMUSG00000014602.16	Kif1a	-0.0585072	3.37866	0.131331	0.799506	1	110	87	46	82	67	68	71	95	81	65	64
	ENSMUSG00000014603.4	Alx3	0.750348	-0.814583	1.126	0.294044	0.654922	1	1	2	0	3	2	2	1	2	4	4
	ENSMUSG00000014606.15	Slc25a11	-0.0537334	5.78504	0.274193	0.602989	0.908672	366	356.45	169.65	306	308	360.03	297	347	315.24	295	262.29
	ENSMUSG00000014609.17	Chrne	0.690259	1.82874	3.34933	0.0785978	0.455605	26	17	0	6	7	42	23	46	26	20	12
	ENSMUSG00000014633.16	Cmc2	-0.207065	2.21281	0.882388	0.352343	0.719265	36	28	14	27	33	23	28	20	26	21	21
	ENSMUSG00000014668.16	Chfr	0.065118	5.40864	0.397748	0.531305	0.861683	289.85	300.66	105	226.4	265.67	285	238.78	315.84	298	223	204.92
	ENSMUSG00000014686.9	Ceacam16	-0.438328	0.869357	1.7627	0.190691	0.617516	12	11.85	3	16.31	13.07	20.78	10.51	17.5	6.86	7.7	5
	ENSMUSG00000014704.11	Hoxa2	-0.104283	0.49938	0.061105	0.814745	1	7.03	4.52	3	3	8.42	5	5.34	5.84	6	4	3
	ENSMUSG00000014725.17	Adam28	2.13436	-1.593	3.59981	0.0755808	0.449283	0	0	0	0	0	0	0	0	0	1	1
	ENSMUSG00000014747.7	Ankrd53	0.27575	-0.224735	0.258163	0.613757	0.916555	7	2	3	1	2	3	4	2	5	2	5
	ENSMUSG00000014748.14	Tex261	0.0244605	6.1252	0.0717857	0.789925	1	603	504	226	395	422	519	460	573	423	440	381
	ENSMUSG00000014763.9	Fam120b	0.0733158	5.60086	0.514274	0.476838	0.817083	368	294	97	241	234	329	258	380	304	256	166
	ENSMUSG00000014767.18	Tbp	0.0536797	4.97213	0.141015	0.709095	0.96846	221.81	218.58	35.88	135.85	144.82	284.39	173.35	256.56	189.56	159.61	91.14
	ENSMUSG00000014769.11	Psmb1	0.0923822	6.28718	0.89838	0.348057	0.714308	573	516	158	456	478	608	466	686	415	480	398
	ENSMUSG00000014771.14	Pdcd2	0.104108	2.87733	0.380983	0.540052	0.868598	51.19	43.42	19.12	39.15	35.18	50.61	36.65	63.44	50.44	32.39	32.86
	ENSMUSG00000014773.14	Dll1	-0.303874	4.54158	3.91188	0.0539689	0.414602	135	128	88	154	126	116	107	134	95	137	62
	ENSMUSG00000014776.8	Nol3	0.109382	3.54885	0.438792	0.510936	0.846161	116.62	74.33	33	71.53	60.34	83.38	83.9	86.07	72.69	66.38	78.59
	ENSMUSG00000014778.11	Fhod1	-0.250582	5.28497	3.2398	0.0794654	0.457537	304	349	202.97	322	301	266	256	304	226	264	234
	ENSMUSG00000014782.17	Plekhg4	-0.119331	1.91106	0.209782	0.649045	0.941988	35	30	16	23	27	17	23	37	21	23	14
	ENSMUSG00000014786.9	Slc9a5	-0.441167	2.00833	2.81863	0.0998023	0.507086	26	30	27	32	29	37	21	35	12	33	17
	ENSMUSG00000014791.11	Elmo3	-0.115039	3.68587	0.509231	0.478995	0.818924	92	64	27	58	63	55	43	95	42	67	36
	ENSMUSG00000014813.10	Stc1	0.198055	2.73021	0.98765	0.325398	0.690112	60	41	16	43	46	55.47	34	92	43.81	60	26
	ENSMUSG00000014837.16	4931428F04Rik	0.356793	1.69161	1.73089	0.194668	0.617516	24.38	29.67	5	10.47	10.66	13.62	15.1	19.93	22.31	22.62	17.41
	ENSMUSG00000014846.13	Tppp3	-0.219696	6.65902	3.8558	0.0554957	0.416063	786	881	461	721	680	721	708	705	573	649	526
	ENSMUSG00000014850.16	Msh3	0.152721	4.96532	1.79691	0.18652	0.617516	229.69	216.61	61.73	163.54	163	228	174.22	187.62	207	218	164
	ENSMUSG00000014852.17	Adamts13	-1.31682	-1.39637	1.50646	0.233775	0.628623	1	0	1	0	1	1	0	0	1	0	0
	ENSMUSG00000014856.13	Tmem208	-0.319205	3.36486	3.0927	0.0851431	0.471495	90	72	18.03	60	55	78	44	97	35	53	23
	ENSMUSG00000014859.10	E2f4	-0.374562	5.15205	9.23003	0.00387659	0.135747	317	345	110	233	250	256	224	301	143	202	120
	ENSMUSG00000014867.10	Surf4	0.185973	7.65056	2.95006	0.0924469	0.488614	1682.94	1840	657.87	1297.92	1217.9	1485.76	1546.89	1595.88	1826	1187.89	1494.93
	ENSMUSG00000014873.16	Surf2	0.173097	3.9435	1.70376	0.198141	0.617516	93.06	130	34.13	82.08	71.1	121.24	91.11	139.12	108	91.11	68.07
	ENSMUSG00000014905.5	Dnajb9	0.328301	4.47609	4.63852	0.0365978	0.350982	148	132	28	96	89	193	125.97	183	184	138	66
	ENSMUSG00000014907.11	Naf1	0.0472649	4.06994	0.121106	0.729389	0.981937	95.91	93.78	46	106	92	124	105	116.93	81	111	72
	ENSMUSG00000014932.16	Yes1	0.385066	4.99833	9.99846	0.00274101	0.116449	172.49	123.16	54.29	148.54	138.35	221.83	138.43	246.47	213.93	164.76	160.8
	ENSMUSG00000014956.16	Ppp1cb	0.454779	7.83079	22.2282	2.18562e-05	0.0116047	1321.57	1158.97	442.89	998.99	1023.04	1607.2	1197.21	1704.1	1711.85	1334.05	1348.62
	ENSMUSG00000014959.13	Gorasp2	-0.0936867	6.09912	0.747244	0.391734	0.758164	580.14	578.88	131.75	370.73	414.72	615.07	419.89	625.06	325	429.9	261.85
	ENSMUSG00000014980.15	Tsen15	-0.174391	3.3041	1.13082	0.293024	0.653812	70	50	20	50	58	70	44	72.65	31	55.66	32.81
	ENSMUSG00000015001.18	Oc90	0.859385	-0.854006	1.16218	0.286507	0.646048	0	2	0	3	2	0	1	2	0	4	4
	ENSMUSG00000015002.19	Efr3a	-0.0182487	6.52159	0.0298263	0.863625	1	684	611	160	505	537	819	437	791	514	600	338
	ENSMUSG00000015013.10	Trappc2l	-0.324271	3.42656	3.72387	0.0596781	0.424582	68	65	38	74	85	87	58	73	54	54	45
	ENSMUSG00000015016.9	Acsf3	0.128115	3.73911	0.67714	0.414722	0.774092	83	102	44	74	77	94	93	90	103	60	85
	ENSMUSG00000015023.8	Ddx19a	0.00505566	5.35172	0.00224081	0.962445	1	339.23	271.39	106.51	225.6	257.6	263.01	261.85	331.07	216.58	235.49	184.98
	ENSMUSG00000015027.12	Galns	-0.466078	3.99342	8.09054	0.00658718	0.173687	119	162	67	116	131	165	105	137	61	113	56
	ENSMUSG00000015053.15	Gata2	-0.190241	3.6355	1.622	0.209065	0.617542	112	127	56	76	93	106	90	120	75	81	61
	ENSMUSG00000015083.12	C8g	-0.860849	-1.17544	0.675632	0.415239	0.77455	1	2	0	1	1	0	0	0	1	1	0
	ENSMUSG00000015085.9	Entpd2	-0.315064	3.94705	5.03669	0.0295559	0.326498	149	123	48.03	84	97.61	127	91	131.57	70	89.6	45
	ENSMUSG00000015087.15	Rabl6	-0.101313	6.00578	1.14174	0.290734	0.650988	464	470	194	377	344	482	389	440	349	366	279
	ENSMUSG00000015090.14	Ptgds	1.28201	-0.686547	2.41014	0.127249	0.544267	0	0	0	1	2	1	2	2	1	3	1
	ENSMUSG00000015092.10	Edf1	0.0891759	5.45193	0.459911	0.501252	0.83772	345	337	161	314	300	254	321	322	320	263	310.03
	ENSMUSG00000015093.16	Clic3	-0.0980229	4.06793	0.252278	0.617817	0.919537	28	35	10	23	35	43	21	50	28	23	15
	ENSMUSG00000015094.17	Npdc1	-0.438305	4.81206	5.63816	0.025114	0.309853	198	208	159.97	186	221.39	198	171	162.43	118	198.4	117
	ENSMUSG00000015095.13	Fbxw5	-0.38049	5.19552	13.5354	0.000600625	0.0586531	281	316	127	249	252	274	196	246	184	196	153
	ENSMUSG00000015112.16	Slc25a13	-0.0647257	3.81115	0.196101	0.659915	0.946974	91	96	29	79	59	98	85	89	72	55	55
	ENSMUSG00000015120.16	Ube2i	0.109994	7.20114	1.19351	0.280182	0.639061	1022.92	1255.05	447.79	849.55	930.61	957.87	926.83	1128.34	1080.2	850.56	929.64
	ENSMUSG00000015126.10	Tsr3	0.0663643	3.10462	0.138264	0.711682	0.97025	56	52.6	38.78	53	51.78	65.68	59	64.73	66	42.84	52
	ENSMUSG00000015127.15	Unkl	0.192785	4.9136	2.78834	0.10159	0.511816	173.35	195.52	72.37	162.59	147.41	196.83	187.71	192.7	184.08	151.84	175.51
	ENSMUSG00000015133.18	Lrrk1	-0.307515	6.9502	10.7775	0.00194151	0.0985776	1104	1151	352	857	839	1010	712	1038	577	734	527
	ENSMUSG00000015134.16	Aldh1a3	-0.232179	3.65952	1.72822	0.195006	0.617516	114	85	36	67	89	119	71	81	77	54	71
	ENSMUSG00000015143.16	Actn1	-0.16754	6.66971	3.544	0.0659494	0.442561	932.71	936.36	349.12	744.42	697.37	877	652.07	874.41	650	682.66	528.09
	ENSMUSG00000015149.15	Sirt2	-0.0821798	5.67398	0.692491	0.40952	0.770311	406	441	155	294	279	373	334	391	272	305	236
	ENSMUSG00000015165.17	Hnrnpl	-0.0684026	7.90452	0.601735	0.441796	0.795996	1772.03	1798	752	1303	1503	1741.04	1493.89	1692	1379.03	1397	1149
	ENSMUSG00000015176.12	Nolc1	0.147442	5.46632	1.93733	0.1705	0.617516	343	334	134	271	250	304	304	418	284	293	234
	ENSMUSG00000015189.13	Casd1	-0.0209587	4.15688	0.0247742	0.875604	1	143	100	45	87	95	147	84	165	85	116	63
	ENSMUSG00000015202.14	Cnksr3	-0.121414	4.00331	0.702582	0.406153	0.76732	90	111	48	100	90	104	89	81	89	96	64
	ENSMUSG00000015214.15	Mtmr1	0.173777	5.69146	2.58103	0.114839	0.532525	296	275	82	186	196	384	212	344	286	248	206
	ENSMUSG00000015217.12	Hmgb3	-0.185189	3.39147	1.46362	0.232395	0.628623	74.71	87.44	25	56.68	56.16	85.51	61.81	62.72	51.79	48.89	51.18
	ENSMUSG00000015222.19	Map2	0.339075	6.32979	7.84584	0.00736793	0.182316	193	149	47	106	117	207	165	227	184	150	119
	ENSMUSG00000015224.11	Cyp2j9	0.211121	2.61489	0.730927	0.396913	0.761599	26	23	4	17	17	39	19	33	25	18	23
	ENSMUSG00000015243.5	Abca1	-0.0900173	7.6544	0.965961	0.330714	0.694971	1545	1547	583	1215	1379	1769	1179	1758	1149	1221	1010
	ENSMUSG00000015247.11	Nipsnap3b	-0.187791	3.73356	1.41118	0.240819	0.628623	139	122	23	105	80	112	77	128	85	76	53
	ENSMUSG00000015289.5	Lage3	-0.201066	3.49035	1.81921	0.18386	0.617516	88	102	34	63	67	84	61	72	69	59	54
	ENSMUSG00000015290.16	Ubl4a	-0.0750245	4.78335	0.338036	0.563739	0.882439	200.42	186.17	47	144.04	132	234	153.94	247	108	149.22	84.41
	ENSMUSG00000015291.11	Gdi1	0.0570846	6.35191	0.294896	0.589662	0.899327	567	592	265	509	511	578	515	595	533	479	514
	ENSMUSG00000015305.7	Sash1	-0.0939473	7.60307	1.07955	0.304105	0.665851	1402.08	1515.04	677.14	1313.54	1256.58	1487.68	1195.86	1493.82	1202.14	1234.35	979.76
	ENSMUSG00000015312.10	Gadd45b	0.215696	4.56979	2.29106	0.136807	0.56131	162	139	73	152	121	113	166	184	164	139	105
	ENSMUSG00000015314.11	Slamf6	-0.740404	3.10254	14.2586	0.000446512	0.0507205	82	85	19	51	88	86	48	51	39	45	19
	ENSMUSG00000015316.12	Slamf1	-0.212262	1.89358	0.671055	0.416812	0.775693	37	32	11	12	28	32	22	31	24	20	12
	ENSMUSG00000015335.17	Zdhhc12	-0.637044	2.65179	9.37235	0.00363371	0.13295	42	61	39	50	50	46	34	42	28	36	23
	ENSMUSG00000015337.6	Endog	-1.11644	1.92955	11.4515	0.00173937	0.0936316	27.66	29.35	23.09	24.73	27.62	26	12.94	21.56	5.75	19.6	4.8
	ENSMUSG00000015340.11	Cybb	0.0748266	7.42414	0.137962	0.714227	0.971906	1339	1385	294	1183	1113	1808	939	1763	1614	897	838
	ENSMUSG00000015341.18	Golga7	0.252319	5.94849	7.00057	0.011043	0.217122	372.74	373.5	120.37	327.24	307.68	446.15	381.72	468.51	379.59	338.22	328.82
	ENSMUSG00000015342.7	Xk	0.281494	1.87754	1.02363	0.316832	0.680607	37	13	11	18	21	25	14	36	18	49	12
	ENSMUSG00000015354.9	Pcolce2	0.19043	4.99618	2.4383	0.125102	0.541507	276	298	97	145	185	266	232	255	237	247	207
	ENSMUSG00000015355.14	Cd48	-0.718615	4.40203	6.12058	0.0226712	0.294912	172	132	31	135	175	232	69	187	67	105	23
	ENSMUSG00000015357.11	Clpx	0.355494	5.45301	9.63437	0.00322759	0.126145	279	209	106	201	255	282	274	294	317	265	258
	ENSMUSG00000015363.14	Trabd	-0.190868	5.66492	2.11762	0.152883	0.59212	307	329	230	306	336	311	293	348	271	246	252
	ENSMUSG00000015365.16	Mov10l1	0	-1.62422	0	1	1	0	0	0	0	0	0	0	0	0	0	0
	ENSMUSG00000015377.11	Dennd6b	-0.0394637	3.7234	0.0745847	0.814173	1	117	121	52	93	95	111	97	122	80	103	81
	ENSMUSG00000015396.5	Cd83	0.120493	3.28364	0.419533	0.520316	0.85265	77	71	15	53	60	80	56	110	68	66	24
	ENSMUSG00000015401.13	Cltrn	-1.24622	-1.50643	1.36974	0.271182	0.628623	0	1	0	0	0	0	0	0	0	0	0
	ENSMUSG00000015405.16	Ace2	0.650239	4.51953	11.1912	0.00184606	0.096039	58	35	8	21	36	52	54	97	62	34	27
	ENSMUSG00000015437.6	Gzmb	0.0753469	7.044	0.0632348	0.804124	1	1370	1864	278	795	745	1135	1150	1148	1554	610	670
	ENSMUSG00000015441.5	Gzmf	0.854825	-1.47925	0.631214	0.458672	0.803312	0	0	0	0	0	1	0	1	0	1	0
	ENSMUSG00000015451.17	C4a	0.105405	0.869703	0.0770909	0.782495	1	15	16.96	2.15	3.04	5.29	8.56	10.49	11.82	15.97	2.13	4.3
	ENSMUSG00000015452.15	Ager	-0.39562	1.10979	1.40129	0.24245	0.628623	13	20	8	10	13	19	17	11	4	8	12
	ENSMUSG00000015461.16	Atf6b	-0.0648056	5.45599	0.319536	0.574571	0.889741	319	348	156	291	259	287	283	337	283	217	232
	ENSMUSG00000015467.15	Egfl8	0.469634	1.87082	2.31682	0.137173	0.562071	14.87	27	11	41.35	21	19	24.87	21	30	27	50
	ENSMUSG00000015468.15	Notch4	-0.33573	4.12567	2.53274	0.124046	0.539764	156	160	128	139	173	128	122	152	111	95	141
	ENSMUSG00000015474.17	Ppt2	-0.0202047	4.23111	0.0174647	0.895426	1	127.26	153	29	120.57	104	163	143.81	156	107	74	79
	ENSMUSG00000015476.7	Prrt1	-0.0516402	1.23214	0.0365689	0.872007	1	16	15	6	17	15	21	10	23	20	9	11
	ENSMUSG00000015478.14	Rnf5	-0.401454	3.3775	5.69039	0.0211341	0.287388	77.04	83.2	37.36	61.93	62.32	52.58	50.2	63	40.62	41.69	45.57
	ENSMUSG00000015484.4	Fam163a	0.281992	-1.42294	0.0722502	0.821843	1	1	1	0	0	1	0	0	0	0	0	3
	ENSMUSG00000015488.15	Cacfd1	0.102744	5.01739	0.290183	0.595143	0.903082	249	213	189	222	181	229	250	259	271	168	263
	ENSMUSG00000015501.11	Hivep2	0.0329818	7.45122	0.0831192	0.77438	1	1593	1363	315.88	917	928	1638	1058	1587.02	972	1277	675
	ENSMUSG00000015522.19	Arnt	0.0777592	6.52393	0.785373	0.380008	0.74698	713	670	220	513	501	773	509	819	553	599	469
	ENSMUSG00000015533.10	Itga2	0.220931	4.48609	2.67906	0.108344	0.529681	169	145	45	77	106	191	110	183	154	135	111
	ENSMUSG00000015536.15	Mocs2	0.304402	5.58253	5.89134	0.0190951	0.275476	302	336	155	246	273	277	305	336	397	242	360
	ENSMUSG00000015542.18	Nat9	-0.0464636	3.45383	0.0562637	0.813732	1	80	90	46	86	106	51	73	79	76	69	82
	ENSMUSG00000015568.17	Lpl	-0.244534	6.73073	3.73363	0.0607515	0.427803	861	845	237	760	787	1229	575	1058	645	564	445
	ENSMUSG00000015575.16	Atp6v0e	-0.247567	5.48482	3.86601	0.0551856	0.416063	333	367	69	209	268	373	210	375	178	219	137
	ENSMUSG00000015597.18	Zfp318	0.146695	5.71776	1.81363	0.184521	0.617516	429	366	101	248	307	463	334	440	349	314	270
	ENSMUSG00000015599.10	Ttbk1	-0.936204	-0.056403	4.0735	0.0492787	0.397396	11	12	2	5	7	4	3	2	3	4	5
	ENSMUSG00000015605.7	Srf	-0.215461	5.27903	2.48457	0.122365	0.537007	328	293	187	228	252	260	268	305	215	235	152
	ENSMUSG00000015619.11	Gata3	0.0553964	6.25056	0.235648	0.629619	0.927624	361	370	94	233	266	353	311	329	291	266	213
	ENSMUSG00000015627.6	Gata5	-1.24075	-1.59414	1.5328	0.271182	0.628623	1	0	0	0	0	0	0	0	0	0	0
	ENSMUSG00000015647.10	Lama5	-0.0113683	7.05579	0.0113517	0.915603	1	969	735	371	773	725	850	843	1067	573	844	453
	ENSMUSG00000015652.10	Steap1	0.144561	2.18848	0.338224	0.563631	0.882378	32	52	15	20	28	27	42	29	22	42	24
	ENSMUSG00000015653.14	Steap2	0.159146	4.71037	1.67974	0.201277	0.617516	222	195	64	129	148	237	166	236	216	178	117
	ENSMUSG00000015656.18	Hspa8	0.192305	10.2422	2.87696	0.0964596	0.499158	10138.2	10150.8	2400.6	6539.65	6847.42	9182.11	7544.09	11024.6	10045.6	7054.13	6101.72
	ENSMUSG00000015659.13	Serac1	-0.199175	3.20328	1.44656	0.235096	0.628623	76.88	62.73	18.67	41.05	51.73	71.55	29.67	57.79	57	43.58	40.9
	ENSMUSG00000015665.9	Awat1	-0.44389	4.07719	6.12992	0.0176487	0.263982	82	95	36	106	118	114	64	137	44	61	45
	ENSMUSG00000015668.14	Pdzd11	0.0538705	4.02635	0.128988	0.72109	0.976185	116.18	119.87	52.18	86.94	88.93	92.03	92.14	87.97	97.84	87.98	110.51
	ENSMUSG00000015671.12	Psma2	0.243362	6.06835	5.00248	0.0300864	0.328373	502	534	129	352	397	526	403	547	565	390	412
	ENSMUSG00000015672.5	Mrpl32	0.134938	3.7377	0.47758	0.493855	0.830849	97	81	15	41	49	129	76	115	73	76	27
	ENSMUSG00000015697.15	Setdb1	0.103238	5.96315	1.10153	0.29929	0.659872	451.54	394.53	186.68	330.7	335.79	472.6	400.51	505.01	349.84	340.76	357.94
	ENSMUSG00000015702.14	Anxa9	0.0277868	4.11451	0.0231863	0.879624	1	31	33	12	19	38	37	29	52	22	19	24
	ENSMUSG00000015709.10	Arnt2	0.0235684	2.61563	0.0144446	0.988956	1	60	49	13	33	37	43	49.89	42	34	49.88	20
	ENSMUSG00000015711.9	Prune1	-0.0777901	4.30435	0.319758	0.574439	0.88973	180	132	58	88	100	185	114	160	84	145	81
	ENSMUSG00000015714.12	Cers2	0.235514	6.32822	3.61111	0.0643717	0.437669	740	744	185	483	409	729	652	791	747	447	482
	ENSMUSG00000015733.14	Capza2	-0.000633146	7.92104	2.1086e-05	0.996366	1	1820	1785	376	1412	1570	2402	1161	2216	1634	1539	994
	ENSMUSG00000015745.10	Plekho1	-0.283765	5.84833	3.39281	0.076056	0.450168	468	649	292	542	459	424	428	441	381	422	340
	ENSMUSG00000015747.6	Vps45	0.0571891	3.55294	0.153054	0.697399	0.961034	92	69	33	56	65	61	60	83	80	61	46
	ENSMUSG00000015748.14	Prpf3	0.100528	4.8261	0.601346	0.441943	0.796095	215	267	75	142	166	198	188	209	242	145	150
	ENSMUSG00000015749.13	Anp32e	0.466681	5.89613	15.3489	0.000287838	0.0403453	420	435	155	316	339	408	452	443	554	366	504
	ENSMUSG00000015750.16	Aph1a	0.0278846	6.66505	0.0928218	0.761963	1	741.1	858.24	300.73	620.78	643.34	715.85	710.43	835.96	614.73	604.38	547.58
	ENSMUSG00000015755.17	Tab2	-0.0679065	7.16793	0.405555	0.527319	0.858872	1115	999	243	712	778	1191	712	1209	677	787	531
	ENSMUSG00000015757.11	Ppil4	0.486755	5.01271	11.7561	0.00136449	0.0838265	240	197	43	156	138	265	174	271	307	182	216
	ENSMUSG00000015759.12	Cnih1	-0.16748	4.98779	1.92917	0.171385	0.617516	239.98	209	57	167.97	169.93	245	137	227.96	122	204	106.88
	ENSMUSG00000015766.15	Eps8	-0.128987	6.73153	1.33152	0.25436	0.628623	941	1100	271	835	703	1022	695	939	777	690	537
	ENSMUSG00000015776.13	Med22	-0.00439757	5.40212	0.00187235	0.965669	1	341	295	127	236	251	287	281	353	245	234	184
	ENSMUSG00000015787.16	Abo	0	-1.62395	0	1	1	0	0	0	0	0	0	0	0	0	0	0
	ENSMUSG00000015790.17	Surf1	-0.236657	3.94622	2.91949	0.0941017	0.493165	109	116	54	84	98	107	84	104	73	90	59
	ENSMUSG00000015804.15	Med28	-0.146842	4.85146	1.28795	0.262172	0.628623	210	192	67	137	175	214	134	206	152	183	78
	ENSMUSG00000015806.13	Qdpr	0.316004	4.48748	5.18265	0.027403	0.321005	178	184	59	126	157	146	191	165	219	143	147
	ENSMUSG00000015812.9	Gnrh1	0.474706	-0.38066	0.547967	0.462825	0.805986	5	0	2	3	1	3	2	2	4	0	8
	ENSMUSG00000015829.14	Tnr	0.105683	0.00223205	0.0604704	0.806823	1	10	7	3	9	3	2	5	14	3	8	2
	ENSMUSG00000015837.16	Sqstm1	0.111279	7.64465	1.46104	0.232801	0.628623	1622.51	1507.11	702.87	1330.32	1281.39	1575.51	1520.16	1751.17	1425.11	1295.08	1307.73
	ENSMUSG00000015839.7	Nfe2l2	-0.0663418	6.35553	0.160117	0.692574	0.958472	629	561	117	427	413	744	381	799	378	514	205
	ENSMUSG00000015843.11	Rxrg	0.0899612	0.997253	0.0772962	0.782213	1	14	12	9	8	7	12	7	16	11	9	13
	ENSMUSG00000015846.16	Rxra	0.00892755	7.31689	0.00883393	0.925517	1	1053	946	384	687	716	978	853	1041	677	767	664
	ENSMUSG00000015850.12	Adamtsl4	-0.140888	5.47468	1.54224	0.220436	0.628623	416	411	186	287	312	350	368	359	255	287	239
	ENSMUSG00000015852.14	Fcrls	-0.137503	-0.261842	0.054241	0.816851	1	4	4	2	0	5	9	2	5	2	7	2
	ENSMUSG00000015854.8	Cd5l	-0.999421	0.60173	8.03784	0.00673017	0.175675	10	20	6	14	16	14	9	5	8	6	5
	ENSMUSG00000015869.17	Prpsap1	-0.202338	5.08737	2.49906	0.120611	0.534421	229	210	95	201	176	245	159	299	104	204	104
	ENSMUSG00000015879.9	Fam184b	0.241708	1.13464	0.481021	0.491368	0.829182	16.8	17.14	0	7.13	5	17.63	14.36	11.66	15.37	12.3	6.09
	ENSMUSG00000015880.14	Ncapg	0.0756563	3.99558	0.241223	0.625606	0.92462	99.61	76.45	25	79.1	92.06	150.87	64.43	107.25	96.31	110.52	68.8
	ENSMUSG00000015882.19	Lcorl	-0.0807145	5.20888	0.267442	0.608578	0.912922	244.39	211.55	57	179.9	183.94	404.13	158.57	294.75	172.69	243.48	115.2
	ENSMUSG00000015889.9	Lta4h	-0.12236	5.28331	1.24742	0.269715	0.628623	310	269	88	178	236	340	210	319	178	230	143
	ENSMUSG00000015890.3	Amdhd1	-0.016288	-0.835851	0.000152253	0.990207	1	0	1	4	0	0	2	1	0	0	2	3
	ENSMUSG00000015932.9	Dstn	-0.0361031	8.04534	0.110109	0.741493	0.990242	1263	1039	419	865	1046	1568	823	1643	844	1215	587
	ENSMUSG00000015937.16	Macroh2a1	-0.281131	6.88272	6.24506	0.016	0.252238	795.07	882	466.71	788.48	820.84	803.87	696.11	931.18	519.41	731.73	436.69
	ENSMUSG00000015942.10	Gtf2ird2	0.131601	3.42847	0.801577	0.375177	0.742621	83.77	78.44	35.02	55.24	73.36	86	67.56	93.38	97.58	65.13	54.58
	ENSMUSG00000015943.12	Bola1	-0.698516	2.03253	6.81718	0.0120731	0.224176	32	26	19	36	23	22	13	31	11	23	8
	ENSMUSG00000015944.10	Castor2	0.277401	5.39824	6.69541	0.0128132	0.230135	379	360	125	236	237	385	326	420	363	280	315
	ENSMUSG00000015947.11	Fcgr1	-0.0427768	7.42182	0.0479846	0.8288	1	1446	1326	390	1351	1227	1529	1104	1648	1394	870	813
	ENSMUSG00000015950.14	Ncf1	-0.0654853	6.10163	0.332584	0.566889	0.884563	593.23	611.56	253.98	533.76	521.64	605	490.44	588.62	604.42	374.87	437.42
	ENSMUSG00000015957.13	Wnt11	0.472862	2.35869	3.81438	0.0567731	0.41652	34	31	18	22	19	36	48.79	47	27	40	25
	ENSMUSG00000015961.9	Adss	0.193415	5.7299	3.86076	0.0553446	0.416063	341	378	131	251	299	412	310	420	361	323	293
	ENSMUSG00000015962.6	1700016C15Rik	0.15072	-1.59434	0.0190826	0.896562	1	0	0	0	0	0	1	0	1	0	0	0
	ENSMUSG00000015966.18	Il17rb	0.13133	2.46062	0.2973	0.588154	0.898257	29	29	16	23	9	33	34	33	22	19	20
	ENSMUSG00000015968.19	Cacna1d	-0.0290831	4.39101	0.0480763	0.827393	1	169.44	163.28	55.44	120.1	122.46	162.37	106.33	201.59	135.52	132.97	79.21
	ENSMUSG00000015970.20	Chdh	0.0660835	5.39601	0.273815	0.603239	0.908758	243.56	186.72	81.56	186.9	197.54	231.63	208.67	225.41	181.48	203.03	159.79
	ENSMUSG00000015971.6	Actr8	0.077444	4.74921	0.451589	0.504866	0.840769	208	180	72	130	147	219	177	205	178	144	129
	ENSMUSG00000015980.15	Lrrc27	-0.291343	0.304599	0.51887	0.474886	0.815599	8	12	3	6	3	11	6	3	6	5	8
	ENSMUSG00000015981.13	Stk32c	-0.186813	2.46072	0.683372	0.412598	0.772887	39	41	38	41	40	44	39	45	45	27	32
	ENSMUSG00000015994.11	Fnta	0.189908	5.44793	2.76647	0.102903	0.515659	289	281	117	268	238	300	300	301	314	232	262
	ENSMUSG00000016018.5	Mtrex	0.161259	5.54852	2.05741	0.158077	0.60227	341.5	318.85	64.18	230.92	278.74	359.83	255.06	365.81	290.29	301.22	218.27
	ENSMUSG00000016024.10	Lbp	0.0383913	6.62577	0.0353813	0.852696	1	963	939	200	419	527	759	778	960	449	716	297
	ENSMUSG00000016028.12	Celsr1	0.0223184	7.27721	0.0508892	0.8225	1	868	944	402	723	691	797	783	997	655	884	539
	ENSMUSG00000016087.14	Fli1	-0.326914	5.08987	7.45173	0.00888664	0.196601	339	341	103	241	246	386	186	262	239	191	193
	ENSMUSG00000016128.15	Stard13	-0.122554	4.91328	1.11292	0.296833	0.657192	253	213	88	208	181	250	174.07	246	159	235	110
	ENSMUSG00000016150.16	Tenm1	1.03518	-0.775992	1.59294	0.213123	0.622491	3	1	0	0	3	0	3	1	2	1	5
	ENSMUSG00000016179.12	Camk1g	0.281917	0.149638	0.371217	0.616718	0.918963	7	7	0	2	3	6	8	2	3	5	6
	ENSMUSG00000016181.10	Utp25	0.322878	4.2932	6.81182	0.0121047	0.224643	154	134	60	85	107	141	143	174	143	115	132
	ENSMUSG00000016194.15	Hsd11b1	0.0545477	2.97123	0.0701945	0.79221	1	59	66	16	35	50	86	37	78	81	46	25
	ENSMUSG00000016200.15	Syt14	0.378643	-0.334611	0.525521	0.472084	0.813447	5	3	1	4	3	3	3	7	5	4	2
	ENSMUSG00000016206.7	H2-M3	-0.193587	4.58063	0.677169	0.419939	0.778254	196	163	114	198	228	171	148	182	212	126	142
	ENSMUSG00000016239.12	Lonrf3	0.0226257	2.98398	0.0122032	0.912508	1	38	52	10	51	45	64	44	82	33	50	15
	ENSMUSG00000016252.8	Atp5e	-0.236227	5.67978	0.696464	0.414218	0.773839	325	240	325	339	443	341	355	348	230	351	287
	ENSMUSG00000016253.13	Nelfcd	0.128574	4.58979	1.0457	0.311726	0.674697	191	208	83	170	170	172	171	195	183	155	197
	ENSMUSG00000016255.6	Tubb1	-0.495412	1.00887	1.74485	0.194438	0.617516	36	22	9	8	22	14	3	15	21	16	10
	ENSMUSG00000016256.11	Ctsz	-0.156627	7.63161	0.701464	0.411831	0.772424	1619	2142	879	1627	1713	1539	1427	1651	1663	987	1503
	ENSMUSG00000016257.16	Prelid3b	0.161848	5.06956	1.79504	0.186745	0.617516	230	227	102	176	208	228	218	236	239	170	224
	ENSMUSG00000016262.15	Sertad4	0.0250477	4.92539	0.0272614	0.869695	1	195	164	39	133	135	211	117	151	118	209	118
	ENSMUSG00000016283.14	H2-M2	0.104242	1.40693	0.102772	0.749946	0.99633	17	23	5	8	12	8	15	22	14	7	8
	ENSMUSG00000016308.13	Ube2a	-0.282435	3.87687	2.17078	0.148936	0.58512	91	65	16	79	71	130	51	115	40	77	27
	ENSMUSG00000016319.4	Slc25a5	-0.0701318	7.67296	0.468452	0.497056	0.833973	1457.27	1513.86	339.93	1083.87	1152.91	1627.2	1008.62	1692.43	937.68	1174.5	764.73
	ENSMUSG00000016327.10	Atp1b4	-0.0640011	0.656979	0.0225333	0.881318	1	10	6	2	2	8	19	5	10	7	4	10
	ENSMUSG00000016344.15	Ppdpf	-0.0797277	3.68497	0.252492	0.617668	0.919537	85.72	86	41	95	88.74	76.65	97	96	58	73	58
	ENSMUSG00000016346.18	Kcnq2	1.17536	0.531341	8.70065	0.00494185	0.15028	10	3	1	2	6	9	8	11	17	11	10
	ENSMUSG00000016349.11	Eef1a2	0.880876	6.52088	18.7121	0.000328581	0.0438112	782	567	194	326	353	698	867	1060	885	569	893
	ENSMUSG00000016356.19	Col20a1	0.161683	2.18451	0.498866	0.48348	0.822616	35	24	12	21	21	35	28	44	22	24	21
	ENSMUSG00000016382.16	Pls3	0.145851	7.15018	2.0694	0.156896	0.599816	896	769	224	589	676	948	611	1030	697	798	564
	ENSMUSG00000016386.16	Mpped2	-0.768836	0.00792933	2.44988	0.124232	0.540032	9	7	1	7	4	5	1	8	2	2	3
	ENSMUSG00000016409.5	Nkap	0.16892	4.26323	1.72555	0.195346	0.617516	135	93	32	89	96	159	108	128	117	114	83
	ENSMUSG00000016427.8	Ndufa1	0.468354	3.8881	4.5904	0.0419209	0.370631	140	153	29	60	73	131	131	118	188	73	124
	ENSMUSG00000016458.16	Wt1	0.15072	-1.56484	0.0192929	0.896562	1	0	0	0	0	0	1	0	1	0	0	0
	ENSMUSG00000016477.19	E2f3	0.00245053	4.43343	0.00040372	0.984054	1	137	168	52	129	117	178	102	204	112	136	102
	ENSMUSG00000016481.16	Cr1l	0.305794	5.97374	6.61157	0.0133508	0.235395	482.57	403.1	102.98	248.93	280.83	532.72	374.73	567.39	488.75	338.44	271.66
	ENSMUSG00000016487.16	Ppfibp1	-0.0119924	6.55557	0.0183814	0.892733	1	782	724	249	575	575	741	508	753	541	673	507
	ENSMUSG00000016493.14	Cd46	0.254102	3.07093	1.63842	0.206814	0.617516	56.18	40.07	6.6	40.13	33.23	78.33	29.02	63.05	59.67	44.08	46.28
	ENSMUSG00000016494.10	Cd34	-0.122159	7.0946	1.25137	0.268967	0.628623	1459.87	1107.94	334.93	734.97	838.98	1319.84	874.98	1181.84	706	1003.93	564.98
	ENSMUSG00000016495.13	Plgrkt	-0.270801	4.76514	5.56673	0.0225041	0.293718	240	202	62	173	142	224	142	211	127	132	103
	ENSMUSG00000016496.8	Cd274	0.203473	8.61952	2.28723	0.140029	0.567102	3537.44	3122.16	921.57	2402.41	2323.12	3456.5	2581.48	3558.86	3137.98	2947.79	2418.7
	ENSMUSG00000016498.11	Pdcd1lg2	-0.564693	1.9029	4.04504	0.0500463	0.400396	34	38	11	28	22	31	13	22	18	18	20
	ENSMUSG00000016503.19	Gtf3a	-0.457615	4.0161	8.35307	0.00580669	0.16166	111.24	120.15	73.89	111.42	110.74	120.84	81.78	124.13	61.06	101.63	47.91
	ENSMUSG00000016510.12	Mtif3	0.00366192	4.03385	0.000721536	0.978684	1	106.76	99.85	52.11	84.58	104.26	101.16	101.22	115.87	103.94	74.37	72.09
	ENSMUSG00000016520.8	Lnx2	-0.387175	4.5449	8.91555	0.00447622	0.145706	169	155	68	154	121	170	114	153	84	136	59
	ENSMUSG00000016524.13	Il19	-0.913801	-1.34569	0.639334	0.427968	0.784786	1	0	0	0	0	2	0	0	0	1	0
	ENSMUSG00000016526.9	Dyrk3	0.195177	1.64149	0.550054	0.46198	0.805614	26	26	6	22	16	22	18	44	21	14	17
	ENSMUSG00000016528.11	Mapkapk2	-0.181269	7.56349	2.71383	0.106141	0.523759	1465	1474	888	1225	1354	1419	1214	1674	1051	1169	998
	ENSMUSG00000016529.6	Il10	-0.387169	2.49855	2.45658	0.123875	0.53967	36	48	11	35	35	47	35	40	16	30	14
	ENSMUSG00000016534.16	Lamp2	0.0380756	8.64343	0.077706	0.782222	1	2783	2403	615	1930	1860	3588	1641	3523	2131	2407	1323
	ENSMUSG00000016541.11	Atxn10	-0.337968	5.57412	10.6811	0.00202543	0.100409	418	338	120	305	346	418	234	348	203	300	190
	ENSMUSG00000016552.14	Foxred2	0.0197615	3.3534	0.0159728	0.899967	1	82	79	28	62	62	81	69	93	46	77	49
	ENSMUSG00000016554.10	Eif3d	0.0681072	6.00514	0.434714	0.512898	0.846747	467.4	463.39	118.72	313.74	348.61	472.21	381.78	510.44	386.02	302.54	284.65
	ENSMUSG00000016559.15	H3f3b	0.220014	8.88291	2.53396	0.121462	0.535718	3197.78	4197.18	1784.91	2975.41	2721.29	3322.08	3254	3336.12	4360.14	3156.92	3663.59
	ENSMUSG00000016619.11	Nup50	0.00129662	5.78005	0.000149724	0.990289	1	405	451	170	373	351	363	349	394	354	325	340
	ENSMUSG00000016624.16	Phf21b	0.015609	0.535331	0.00185241	0.965852	1	11	10	3	7	8	6	9	10	6	8	5
	ENSMUSG00000016637.8	Ift27	-0.448654	2.60888	5.41024	0.0243758	0.306616	67	49	18	36	39	50	39	44	29	29	17
	ENSMUSG00000016664.17	Pacsin2	0.0331163	6.4976	0.103356	0.749262	0.99577	730	803	310	604	638	742	585	703	773	569	614
	ENSMUSG00000016756.18	Cmah	-0.0606912	3.90642	0.153768	0.69673	0.960649	141	113	24	78	81	160	87	107	100	98	64
	ENSMUSG00000016757.12	Ttll12	-0.139176	4.83895	1.4937	0.227727	0.628623	217	205	93	158	185	196	139	250	137	166	128
	ENSMUSG00000016758.5	Bik	-0.245978	0.480845	0.39052	0.541861	0.869736	5	7	4	11	10	6	7	9	3	6	6
	ENSMUSG00000016763.16	Scube1	0.0838254	1.46596	0.0958851	0.758191	1	24	16	12	14	15	23	14	24	17	12	25
	ENSMUSG00000016831.13	Tox4	0.10498	6.59654	1.23407	0.272258	0.629583	767.63	753.98	183.92	511.99	513.94	747.34	565.88	828.75	611.65	567.55	461.4
	ENSMUSG00000016833.15	Mrps18c	0.864371	4.03736	15.967	0.000505275	0.0539076	106	134	25	93	76	109	161	122	249	88	159
	ENSMUSG00000016918.16	Sulf1	0.0752141	6.13716	0.472573	0.495179	0.831962	660	593	134	385	388	597	455	684	426	509	289
	ENSMUSG00000016921.15	Srsf6	0.399441	7.48639	15.3168	0.000291544	0.0405902	1127	1139	366	858	901	1205	1079	1209	1501	1099	1070
	ENSMUSG00000016933.18	Plcg1	0.151279	6.45782	2.1772	0.146727	0.580726	620.96	552	232.96	457	509.83	537.96	480	603	599	448.93	543
	ENSMUSG00000016940.19	Kctd2	-0.0326844	4.54381	0.0527586	0.819326	1	146	176	84	137	163	139	137	151	135	108	164
	ENSMUSG00000016942.7	Tmprss6	-0.176942	0.162918	0.150554	0.699755	0.962636	8	6	4	5	9	2	8	8	5	4	1
	ENSMUSG00000016946.7	Kctd5	0.10754	5.14805	0.851592	0.360808	0.728246	200	201	51	144	156	187	187	232	150	161	106
	ENSMUSG00000016982.7	Pom121l2	-0.491647	-1.53456	0.199068	0.670373	0.946974	0	0	0	1	0	1	1	0	0	0	0
	ENSMUSG00000016984.8	Etaa1	0.0328807	3.85809	0.0477313	0.828003	1	75	83	22	69	68	119	55	113	78	80	44
	ENSMUSG00000016995.18	Matn4	0.236895	2.3917	1.09636	0.300413	0.661149	42	40	24	19	38	31	51	54	28	30	33
	ENSMUSG00000017002.15	Slpi	-0.117769	3.95355	0.333869	0.567975	0.885102	130	134	74	102	134	111	89	143	132	106	78
	ENSMUSG00000017007.10	Rbpjl	0.512173	0.0733731	1.31343	0.257566	0.628623	4	9	2	1	5	5	9	8	5	5	4
	ENSMUSG00000017009.4	Sdc4	0.256742	8.00638	6.29484	0.0156094	0.250459	1680	1770	744	1136	1300	1558	1606	2011	1875	1654	1167
	ENSMUSG00000017057.10	Il13ra1	0.376933	7.33446	6.08721	0.0205209	0.284142	1063	798	173	593	618	1049	732	1346	918	1019	484
	ENSMUSG00000017119.21	Nbr1	0.308084	6.89401	8.28185	0.00600292	0.163935	841	795	268	652	685	729	728	829	941	649	836
	ENSMUSG00000017132.18	Cyth1	-0.260262	5.59308	5.95361	0.0185068	0.271242	357	378	164	342	339	371	267	352	320	251	197
	ENSMUSG00000017144.9	Rnd3	0.330189	6.15276	8.38654	0.00571682	0.160457	468	553	116	365	369	491	372	557	598	458	398
	ENSMUSG00000017146.13	Brca1	-0.178321	4.46347	1.793	0.186991	0.617516	145	198	59	147	127	178	107	145	132	132	107
	ENSMUSG00000017167.7	Cntnap1	-0.10845	2.39268	0.231476	0.63266	0.929692	36.33	32	15.58	26.17	17.16	22	27.05	23.11	26.52	20.21	18.91
	ENSMUSG00000017176.18	Nt5c3b	0.10655	3.42938	0.490149	0.487306	0.826086	68.4	69.07	22.05	46.02	57.26	74.05	61.06	97.31	51.06	51.13	43.22
	ENSMUSG00000017188.4	Coa3	-0.166167	3.6581	1.09708	0.300255	0.661025	93	113	32	79	83	101	88	105	48	90	43
	ENSMUSG00000017195.16	Zpbp2	-2.15317	-1.13157	3.96207	0.0523598	0.409096	0	1	3	2	1	0	0	1	0	0	0
	ENSMUSG00000017204.5	Gsdma	0.888265	4.51213	17.6396	0.000117809	0.0272271	22	21	5	15	13	18	31	52	22	16	25
	ENSMUSG00000017210.15	Med24	-0.1898	5.40468	2.77692	0.102273	0.513745	358	317	111	221	264	311	257	367	173	242	134
	ENSMUSG00000017211.15	Gsdma2	0.178369	-1.34166	0.0190032	0.896562	1	0	0	0	0	0	1	0	0	1	0	0
	ENSMUSG00000017221.15	Psmd3	-0.21909	6.77669	5.49589	0.0233315	0.299124	833	1007	316	688	715	830	668	877	538	644	444
	ENSMUSG00000017264.17	Exosc10	-0.0549303	5.41984	0.293731	0.590396	0.899778	382	336	102	268	242	318	263	372	252	248	181
	ENSMUSG00000017286.16	Glod4	0.280844	4.86136	3.19178	0.0824794	0.465535	150	164	78.39	133	132	213.3	171	171	237	149.38	148
	ENSMUSG00000017288.16	Vps53	0.0191449	5.38122	0.0373518	0.847582	1	313	299	130	229	235	306	260	316	253	224.62	228
	ENSMUSG00000017291.14	Taok1	0.203079	8.16638	3.06129	0.0866942	0.475543	1837	1551	395	1155	1186	2361	1253	2270	1656	1571	1081
	ENSMUSG00000017299.14	Dnttip1	0.0497852	3.97075	0.13432	0.715637	0.972606	119	154	48	94	105	108	119	114	117	88	98
	ENSMUSG00000017300.10	Tnnc2	1.04228	6.26169	11.129	0.00343142	0.129117	625.35	314.22	226.81	323.35	445.83	575.08	698.7	692.53	898.79	511.13	1307.83
	ENSMUSG00000017307.17	Acot8	-0.34149	3.33786	5.13456	0.028093	0.323018	70.05	78.71	26.47	69.45	62.33	73.3	57.51	64.11	48.83	48.44	32.59
	ENSMUSG00000017309.12	Cd300lg	-0.405695	3.13085	4.51834	0.0388085	0.360497	88	59	22	80	66	70	60	60	41	43	37
	ENSMUSG00000017311.16	Pyy	-0.393905	-0.0839945	0.316673	0.576284	0.890871	1	2	3	1	3	4	2	3	1	2	1
	ENSMUSG00000017314.13	Mpp2	0.308573	2.58352	1.9057	0.173962	0.617516	29	27	19	32	34	35	50	45	38	40	15
	ENSMUSG00000017344.5	Vtn	-0.151488	1.54934	0.305214	0.583246	0.895708	26	15	9	11	16	26	19	25	19	8	7
	ENSMUSG00000017376.16	Nlk	-0.0930668	4.50793	0.559629	0.458131	0.803312	188	161	50	120	132	201	145	175	132	120	84
	ENSMUSG00000017386.11	Traf4	-0.175677	3.02216	1.02403	0.316739	0.680532	96	59	27	47	51	51	50	73	39	51	34
	ENSMUSG00000017390.16	Aldoc	0.176238	1.7522	0.429986	0.515188	0.848357	13	13	3	12	12	14	13	18	11	12	9
	ENSMUSG00000017400.11	Stac2	0.100561	1.83739	0.121687	0.728768	0.981562	14	21	17	12	10	19	23	22	17	17	8
	ENSMUSG00000017404.13	Rpl19	0.268951	7.93299	7.16698	0.0101891	0.209879	1925.52	2125.74	609.46	1379.18	1366.08	1707.27	1914.37	1982.4	1995.72	1418.52	1596.38
	ENSMUSG00000017405.15	Nek8	-0.301562	3.15219	3.27805	0.0765969	0.451261	74	56	33	69	59	67	45	68	49	48	38
	ENSMUSG00000017412.16	Cacnb4	-0.237823	2.14053	0.830442	0.366788	0.734656	38.6	29.6	6.23	18.78	20	41.9	15.39	40.48	22.87	23.78	6.6
	ENSMUSG00000017417.15	Plxdc1	0.00484315	3.74731	0.000878391	0.976481	1	97	92	29	69	68	103	77	91	65	78	65
	ENSMUSG00000017418.15	Arl5b	0.275503	5.76774	5.36981	0.0248861	0.309239	297	207	59	187	186	331	182	361	232	280	189
	ENSMUSG00000017421.19	Zfp207	0.223148	7.11172	2.44346	0.128726	0.546457	919	799	146	524	518	1125	630	1050	848	732	459
	ENSMUSG00000017428.17	Psmd11	0.145939	6.89955	2.21819	0.143063	0.5732	882.85	903.65	342.22	680.15	752.08	880.54	759.86	877.25	920.33	688.84	792.37
	ENSMUSG00000017446.15	C1qtnf1	0.273525	4.81483	4.40849	0.0411473	0.367927	287.84	213.54	76	169.77	155.77	224.07	254.41	230.51	218.01	172.47	221.35
	ENSMUSG00000017453.5	Pipox	0.0356169	0.167446	0.00610326	0.938061	1	13	8	1	5	1	7	6	7	9	4	3
	ENSMUSG00000017466.10	Timp2	-0.0155371	8.28282	0.0251756	0.874609	1	3015	2998	893	1942	2027	2792	2365	2691	2138	2066	1756
	ENSMUSG00000017478.16	Zc3h18	0.171344	6.16332	2.06097	0.157725	0.601426	485.86	564	269	422.89	487.79	449.95	531	552	548	434.92	498
	ENSMUSG00000017485.12	Top2b	0.0769876	7.43889	0.602044	0.44168	0.795942	983.83	875.9	311	723	922.89	1228.84	647.82	1230	827.88	1025.85	665.91
	ENSMUSG00000017491.10	Rarb	-0.120307	0.442602	0.0992138	0.754167	0.999543	7.17	8.1	3	8	10.11	9.16	6.18	7	9.12	4.15	8.09
	ENSMUSG00000017493.13	Igfbp4	-0.208139	8.05268	2.26614	0.142376	0.572196	2478	2851	1291	1761	2202	2139	1923	1791	1563	2054	1941
	ENSMUSG00000017499.16	Cdc6	0.0715504	3.26294	0.158457	0.69238	0.958387	73	84	23	52	63	66	54	48	83	68	54
	ENSMUSG00000017548.16	Suz12	0.133272	6.00518	1.43623	0.236748	0.628623	463	459	116	338	322	572	285	472	483	417	334
	ENSMUSG00000017550.15	Atad5	-0.0645104	4.65667	0.212279	0.647108	0.940521	176	116	71	133	165	196	111	171	135	185	91
	ENSMUSG00000017561.17	Crlf3	-0.189709	5.54028	2.28125	0.13763	0.563041	329	334	203	343	345	325	264	375	284	294	228
	ENSMUSG00000017588.3	Krt27	0.160296	1.64302	0.0613029	0.805812	1	5	3	0	1	3	2	2	4	3	2	2
	ENSMUSG00000017607.10	Tns4	-0.0568081	7.39766	0.159045	0.692904	0.958573	1018	782	290	771	709	1015	771	1122	510	970	350
	ENSMUSG00000017615.13	Tnfaip1	0.0724678	6.38175	0.685172	0.411988	0.772463	586	614	203	425	457	581	458	691	505	459	396
	ENSMUSG00000017631.20	Abr	-0.115881	7.20967	1.20315	0.278271	0.636839	1150	1251	606	939	1126	1198	934	1128	1079	839	932
	ENSMUSG00000017639.14	Rab11fip4	0.303199	5.22738	7.06748	0.0106909	0.213635	212	223	106	164	198	204	244	276	212	201	220
	ENSMUSG00000017652.17	Cd40	-0.23765	4.90815	1.98532	0.169246	0.617516	237	267	93	209	222	235	176	276	177	170	114
	ENSMUSG00000017664.17	Slc35c2	-0.253484	4.62724	4.54605	0.0382416	0.357916	216	175	80	178	162	215	163	194	131	153	87
	ENSMUSG00000017667.10	Zfp334	-0.121965	3.009	0.52004	0.474391	0.815436	70	68	37	42	54	70	46	63	48	64	44
	ENSMUSG00000017670.17	Elmo2	-0.360888	6.20042	12.1993	0.00105109	0.0740062	616	653	205	534	552	604	433	593	371	399	274
	ENSMUSG00000017677.12	Wsb1	0.0466575	6.11584	0.193986	0.661635	0.946974	465	582	185	472	407	513	437	570	508	400	347
	ENSMUSG00000017679.17	Ttpal	-0.000978332	6.29333	8.26346e-05	0.992785	1	379	327	120	310	347	451	292	494	294	366	182
	ENSMUSG00000017686.18	Rhot1	0.144374	5.43664	2.10535	0.153416	0.592496	309	247	92	188	224	357	247	320	253	254	204
	ENSMUSG00000017688.15	Hnf4g	0.128638	-1.39654	0.0186437	0.891975	1	0	0	1	0	1	0	0	1	0	1	0
	ENSMUSG00000017692.9	Rhbdl3	0.449854	2.87937	5.10672	0.028501	0.324908	49	57	11	40	47	35	49	47	77	40	51
	ENSMUSG00000017697.4	Ada	-0.1443	2.52753	0.555353	0.459843	0.80447	48	53	8	35	36	53	30	61	27	33	23
	ENSMUSG00000017707.10	Serinc3	0.0364339	8.29381	0.0891254	0.766787	1	2506	2499	492	1847	1773	3055	1631.98	3063	2191	1770	1374
	ENSMUSG00000017713.10	Tha1	-0.299121	2.41246	2.02581	0.16124	0.608172	46	42	28	31	49	33	31	39	35	25	30
	ENSMUSG00000017715.12	Pgs1	0.0918394	7.07908	0.698711	0.40744	0.768692	1027	1172	465	908	869	843	1033	1124	972	901	757
	ENSMUSG00000017716.16	Birc5	-0.0438952	3.91195	0.0862764	0.770257	1	114	110	39	91	99	114	83	87	112	108	63
	ENSMUSG00000017718.16	Afmid	-0.334568	1.95411	1.31239	0.258866	0.628623	46.48	30.93	4	23.52	32.63	30.4	21.56	35.3	22.94	17.63	11.78
	ENSMUSG00000017720.3	Trp53tg5	0.61601	-1.17904	0.381705	0.539669	0.868454	0	3	0	0	0	0	2	0	1	0	1
	ENSMUSG00000017721.16	Pigt	-0.397651	5.94919	7.18476	0.0117573	0.223358	528.8	525.56	206	355	396	445	399	560	211	322	136.51
	ENSMUSG00000017723.12	Wfdc2	0.264765	-0.753728	0.117588	0.733192	0.984306	3	2	1	0	0	2	0	2	2	2	2
	ENSMUSG00000017724.15	Etv4	0.209183	3.22799	0.972818	0.329584	0.693939	65	46	34	33	43	34	57	64	44	56	34
	ENSMUSG00000017734.16	Dbndd2	0.205352	3.55202	1.3232	0.255829	0.628623	84	92.12	29	43	85.02	79.7	59.87	65.33	80.39	72.26	103
	ENSMUSG00000017737.3	Mmp9	-0.799251	5.36451	11.5364	0.00291101	0.119427	696	587	153	296	386	449	243	287	156	302	200
	ENSMUSG00000017740.18	Slc12a5	-0.700603	0.782015	3.79483	0.0573872	0.418444	11	12	8	16	5	12	6	4	10	8	5
	ENSMUSG00000017747.14	Ghdc	-0.25834	3.43861	2.68697	0.107839	0.528476	89	96	38	81	90	68	70	71	72	53	58
	ENSMUSG00000017754.14	Pltp	-0.174247	6.25667	2.80161	0.100802	0.509675	705.81	629.79	228.47	536.19	527.69	657.3	578.12	697.59	407.63	411.12	345.71
	ENSMUSG00000017756.10	Slc12a7	-0.184681	6.41502	3.72462	0.0596536	0.424582	709	715	261	565	630	765	536	769	434	490	454
	ENSMUSG00000017760.17	Ctsa	-0.402871	7.12986	15.4672	0.000274605	0.0393378	1049.86	983.37	285.26	809.27	867.35	1139.64	709.56	985	551.48	575.99	401.35
	ENSMUSG00000017764.3	Zswim1	-0.292895	3.73612	3.48284	0.0682443	0.449283	99	72	31	61	52	85	49	89	38	61	38
	ENSMUSG00000017765.18	Slc12a4	-0.275482	6.13047	5.85804	0.0194179	0.277707	539.83	538.47	308.96	434.7	525.85	537.92	429.74	572.95	324.91	469.82	295.58
	ENSMUSG00000017767.4	Spata25	-0.771644	-0.506156	1.69393	0.199417	0.617516	4	5	1	5	1	8	4	1	0	3	3
	ENSMUSG00000017774.20	Myo1c	-0.0362067	7.8109	0.165309	0.686157	0.954713	1777	2008	698	1452	1395	1706	1516	1889	1418	1388	1172
	ENSMUSG00000017776.16	Crk	0.514175	7.29552	26.909	4.43549e-06	0.00591404	1076	1052	347	848	783	1055	1086	1301	1459	1005	1130
	ENSMUSG00000017778.15	Cox7c	0.532315	5.74717	6.73839	0.0170938	0.26013	410.2	554.22	93.43	299.2	212.03	376.77	480.81	409.89	646.46	254.58	408.25
	ENSMUSG00000017781.18	Pitpna	0.00283082	7.67632	0.000771418	0.977959	1	1640	1950	654	1369	1463	1620	1461	1640	1526	1248	1323
	ENSMUSG00000017801.16	Mlx	-0.242145	4.42435	3.33802	0.0740394	0.449283	148.92	163.53	42.14	122.48	129.22	163.55	105.61	194.07	72.96	106.66	68.83
	ENSMUSG00000017802.15	Retreg3	-0.0648326	5.92468	0.42672	0.516781	0.849671	453	395	181	333	358	392	337	446	288	339	296
	ENSMUSG00000017817.12	Jph2	0.197876	5.43835	0.99346	0.330056	0.694299	458	253	164	189	287	353	315	377	342	234	350
	ENSMUSG00000017830.16	Dhx58	-0.261019	6.54398	2.97595	0.0960114	0.498098	857.95	872	313.77	767	747.96	716	643	907	534	534	427
	ENSMUSG00000017831.9	Rab5a	0.0821279	6.46258	0.516639	0.475831	0.81643	460.59	354.93	123	316.94	341.93	602.17	287	564.67	375.96	429.93	256
	ENSMUSG00000017832.3	Hspb9	-0.628417	1.29354	3.68232	0.0610662	0.428539	19	26	15	17	19	7	9	19	9	16	6
	ENSMUSG00000017837.13	Nkiras2	-0.150924	5.44844	1.89002	0.175708	0.617516	338.95	317.62	118.42	255.43	218.78	294	253.53	356.36	208	216.65	146
	ENSMUSG00000017843.15	Ppp2r5c	-0.121487	6.87743	1.8777	0.177095	0.617516	846	825	345	705	773	958	657	885	626	747	526
	ENSMUSG00000017858.13	Ift52	0.0323732	4.47862	0.078673	0.780333	1	146	152	52	109	108	171	121	167	103	128	105
	ENSMUSG00000017861.12	Mybl2	0.0586686	3.46765	0.141948	0.767203	1	104.08	112.9	35.34	73.07	62.66	78.93	85.54	74.47	80.26	78.59	77.58
	ENSMUSG00000017868.17	Sgk2	-0.250103	-1.0925	0.0956337	0.758498	1	2	1	0	0	2	4	0	1	2	3	0
	ENSMUSG00000017897.19	Eya2	-0.152408	1.76865	0.318058	0.575454	0.890522	36	47	4	20	21	18	27	20	25	17	16
	ENSMUSG00000017929.14	B4galt5	-0.303618	7.32787	5.24804	0.0283665	0.32432	1413	1580	684	1252	1217	1290	1073	1450	921	1173	633
	ENSMUSG00000017943.16	Gdap1l1	0.0234335	-0.950541	0.000831064	0.977123	1	2	1	0	0	4	0	3	2	0	1	0
	ENSMUSG00000017950.17	Hnf4a	-0.960645	-1.50683	0.767144	0.398671	0.761599	2	0	0	0	1	0	0	1	0	0	0
	ENSMUSG00000017969.14	Ptgis	-0.0789064	4.93278	0.516066	0.476075	0.816464	356	256	94	211	228	287	250	246	196	240	174
	ENSMUSG00000017978.19	Cadps2	0.00701049	1.47092	0.000740096	0.978411	1	19	17	10	18	25	22	15	21	26	17	15
	ENSMUSG00000017999.17	Ddx27	0.304835	5.12953	6.15317	0.0167487	0.257713	244	306	109	188	169	231	256	275	264	213	263
	ENSMUSG00000018001.19	Cyth3	0.300493	6.82777	9.48734	0.00344921	0.129166	834	880	300	694	628	807	868	930	891	712	782
	ENSMUSG00000018008.9	Cyth4	-0.0593877	7.36926	0.155308	0.6967	0.960649	1662	1858	537	1363	1199	1445	1457	1496	1334	1031	1034
	ENSMUSG00000018012.12	Rac3	0.0909249	1.85064	0.11108	0.740398	0.989414	25	13	18	10	22	15	20	21	19	19	16
	ENSMUSG00000018040.10	Rrp7a	0.0698805	6.00294	0.273709	0.604008	0.909284	475.9	638.54	256.01	379.66	450.26	417.85	484.49	490.95	512.78	341.85	479.99
	ENSMUSG00000018042.19	Cyb5r3	0.0163218	7.18181	0.0305619	0.861971	1	1301	1160	429.97	881	935	1074	1107	1213.99	788	1047	719
	ENSMUSG00000018068.14	Ints2	0.105433	5.04982	0.961587	0.3318	0.696067	256.49	196.69	68	155.31	180.7	255.67	153.31	279.37	214.5	200.01	141
	ENSMUSG00000018076.13	Med13l	0.0313889	8.04722	0.121783	0.728664	0.981528	2140	2045	648	1632	1407	2154	1716	2335	1543	1704	1184
	ENSMUSG00000018102.6	H2bc4	-0.345984	5.18292	2.27579	0.146818	0.580773	309.2	243.46	47.75	161.38	154.78	335.42	134.88	266.4	140.67	213.62	49.66
	ENSMUSG00000018126.16	Baiap2l2	-0.0275612	0.169684	0.00255321	0.977512	1	2	2	3	1	4	5	4	2	1	5	2
	ENSMUSG00000018143.11	Mafk	0.472283	6.14398	17.474	0.000125509	0.0282534	507	494	226	421	376	447	607	651.95	647	465	514.95
	ENSMUSG00000018160.16	Med1	0.0364633	6.7307	0.141832	0.708159	0.967974	835	771	197	571	601	893	627	875	626	617	469
	ENSMUSG00000018166.9	Erbb3	0.282346	6.48022	7.34859	0.00933672	0.202298	395	364	133	271	251	346	364	504	364	334	234
	ENSMUSG00000018167.11	Stard3	-0.108848	5.04635	0.904755	0.346368	0.712105	281	331	106	261	246	257	232	291	239	191	194
	ENSMUSG00000018168.9	Ikzf3	-0.450768	4.18987	10.1871	0.00251995	0.111539	160	202	58	121	168	203	92	138	104	119	95
	ENSMUSG00000018169.13	Mfng	-0.28884	2.62163	2.09608	0.154305	0.593456	51	64	14	50	44	57	39	64	31	35	23
	ENSMUSG00000018171.10	Vmp1	0.0956593	7.22429	0.492334	0.488019	0.826739	1036	1231	281	868	801	1324	773	1485	1081	865	650
	ENSMUSG00000018189.13	Uchl5	0.290317	4.10649	4.88839	0.0319315	0.335326	116	126	28	95	86	114	103	139	120	102	98
	ENSMUSG00000018196.19	Glrx2	0.439271	4.64157	12.3188	0.000999134	0.0723821	151	121	39	89	106	172	118	186	161	137	141
	ENSMUSG00000018199.10	Ro60	0.140633	5.5503	1.59295	0.213122	0.622491	311	221	69	187	203	321	178	330	210	283	178
	ENSMUSG00000018209.16	Stk4	-0.0726669	6.68969	0.575401	0.451902	0.803312	762	859	248	616	693	844	585	764	732	548	501
	ENSMUSG00000018217.13	Pmp22	-0.337149	6.93328	4.84299	0.036817	0.351911	1472	1004	295	746	728	1415	761	1189	508	849	369
	ENSMUSG00000018238.7	Gdf9	-1.02023	-0.652406	1.80967	0.185	0.617516	3	5	2	3	6	0	0	6	0	0	2
	ENSMUSG00000018239.10	Zcchc10	0.0842008	2.34082	0.163165	0.688089	0.955961	31	39	6	27	33	39	28	43	34	31	17
	ENSMUSG00000018263.12	Tbx5	-0.475629	0.0758851	1.02254	0.317086	0.68092	12	5	0	9	4	12	4	8	1	3	8
	ENSMUSG00000018286.7	Psmb6	-0.0420375	6.11708	0.100265	0.7533	0.999125	543	497	319	408	463	447	456	488	446	394	462
	ENSMUSG00000018287.13	Spag7	0.192436	3.99072	1.85185	0.180048	0.617516	124	120	50	89	93	100	121	118	140	89	82
	ENSMUSG00000018293.5	Pfn1	-0.254111	8.47612	5.04482	0.0294313	0.326498	3020	4105	1435	2691	2583	2869	2689	2737	2314	2006	2035
	ENSMUSG00000018322.11	Tomm34	-0.126057	4.93994	1.34671	0.251705	0.628623	233	264	76	181	211	238	165	271	176	189	122
	ENSMUSG00000018326.10	Ywhab	-0.0101693	7.56345	0.0140587	0.906121	1	1394	1332	535	1153	1174	1517	1118	1540	1093	1221	937
	ENSMUSG00000018334.19	Ksr1	0.288074	5.68657	5.97101	0.018346	0.270019	411	415	179	218	282	343	399	447	364	344	338
	ENSMUSG00000018339.13	Gpx3	-0.326672	7.37967	4.60882	0.0412391	0.368329	1533	1174	490	839	1111	1607	1040	1454	589	1053	437
	ENSMUSG00000018340.14	Anxa6	-0.126883	7.09752	1.71482	0.196716	0.617516	1247	1299	471	945	1074	1230	943	1234	952	794	851
	ENSMUSG00000018341.13	Il12rb2	-0.110509	3.54528	0.166872	0.68678	0.954836	80.08	93.97	20.24	61.14	70.36	107.91	65	133.05	62.75	63.96	16.12
	ENSMUSG00000018347.17	Zkscan6	0.0432105	3.81677	0.0805019	0.777863	1	93	69	36	91	81	95	83	99	73	72	74
	ENSMUSG00000018362.15	Kpna2	-0.0740081	5.83458	0.552571	0.460963	0.805141	359.8	411.72	144.52	307.35	381.37	427.58	276.22	429.5	279.06	374.45	256.34
	ENSMUSG00000018363.17	Smurf2	0.0490974	6.02082	0.255054	0.615895	0.918302	510	476	163	354	327	531	353	490	420	381	352
	ENSMUSG00000018372.14	Cep95	0.0277149	3.11923	0.0286577	0.866297	1	48	53	20	44	34	58	39	59	41	38	41
	ENSMUSG00000018377.11	Vezf1	0.0926112	6.17656	0.205126	0.655439	0.94556	677	551	89	285	300	734	457	659	404	449	246
	ENSMUSG00000018378.14	Cuedc1	0.199086	5.39842	2.26285	0.139767	0.566829	382	277	161	246	268	309	365	336	276	272	327
	ENSMUSG00000018379.18	Srsf1	0.204202	7.65799	4.96902	0.0306153	0.329711	1313	1242	474	953	1066	1385	1034	1453	1345	1233	1050
	ENSMUSG00000018381.16	Abi3	-0.526978	4.60063	12.9686	0.000760104	0.0643008	191.47	224.35	82.9	185.81	220.48	227.92	127.7	178.44	112.35	171.31	77.59
	ENSMUSG00000018387.13	Shroom1	-0.941844	-0.235949	2.61626	0.112455	0.532525	6	4	4	4	4	5	1	7	0	2	2
	ENSMUSG00000018395.20	Kif3a	0.064504	3.33322	0.171499	0.680663	0.951781	80	80	32	49	53	79	65	99	62	57	46
	ENSMUSG00000018398.19	Septin8	0.0363395	7.24815	0.174993	0.677614	0.949816	941	940	330	692	676	935	767	982	727	708	647
	ENSMUSG00000018401.18	Mtmr4	-0.134155	5.94454	1.73531	0.19411	0.617516	433	452	179	332	403	412	297	451	346	373	242
	ENSMUSG00000018405.8	Mrm1	0.0900215	3.45429	0.213123	0.646728	0.940284	68	58	51	71	74	65	76	64	90	46	77
	ENSMUSG00000018411.18	Mapt	0.129216	3.47306	0.525548	0.472073	0.813447	131	65	34	48	60	102	72	102	84	68	68
	ENSMUSG00000018412.17	Kansl1	-0.150171	6.79951	2.79549	0.101164	0.51049	904	852.47	306.76	685.36	679.35	997	668.54	895.49	626.52	694	439.13
	ENSMUSG00000018415.15	Gid4	0.212613	5.55431	4.50298	0.0391267	0.361422	318	278	99	232	224	313	270	365	301	257	211
	ENSMUSG00000018417.15	Myo1b	0.118287	5.40647	1.42888	0.237934	0.628623	291	267	95	195	205	293	231	271	239	237	215
	ENSMUSG00000018425.19	Dhx40	0.10495	4.82411	0.718595	0.400894	0.763322	184	149	53	137	174	272	145	260	163	187	108
	ENSMUSG00000018427.9	Ypel2	0.0461875	4.41397	0.0896289	0.765967	1	149	94	21	72	83	131	85	118	93	73	84
	ENSMUSG00000018428.16	Akap1	0.325401	5.14716	6.31072	0.0154869	0.24925	251	250	138	164	188	208	270	285	263	198	261
	ENSMUSG00000018433.15	Nol11	0.12251	4.96793	1.10422	0.298706	0.659149	211	200	46	159	166	240	162	268	148	211	123
	ENSMUSG00000018442.14	Derl2	0.218029	5.4613	3.73653	0.0592623	0.423335	284	327	78.52	237	236.46	333	257	349	351	232	223.1
	ENSMUSG00000018446.9	C1qbp	0.119701	5.14132	1.06737	0.30682	0.668585	278	297	93	190	194	229	236	330	202	240	160
	ENSMUSG00000018449.13	Rpain	-0.118467	2.63025	0.347496	0.571953	0.888384	40	41	27	40	42	50	35	51	42	24	37
	ENSMUSG00000018451.8	6330403K07Rik	-0.129637	-0.262685	0.0501984	0.823688	1	3	8	0	6	6	3	0	7	6	6	1
	ENSMUSG00000018459.16	Slc13a3	-0.274308	2.60056	1.58032	0.214915	0.625856	49	38	19	60	44	45	38	49	21	42	29
	ENSMUSG00000018470.9	Kcnab3	0.649732	-0.191621	1.38631	0.244947	0.628623	2	2	0	1	5	2	2	5	3	3	3
	ENSMUSG00000018474.19	Chd3	0.0107438	5.99946	0.00852673	0.92682	1	587	621	239	438	416	471	505	461	468	401	470
	ENSMUSG00000018476.8	Kdm6b	0.0852045	6.80477	0.767578	0.385416	0.752005	903.85	940	367	682	624	799.87	797	986	806.92	684.86	591
	ENSMUSG00000018479.13	1700125H20Rik	1.4327	-1.59332	1.93407	0.208944	0.617516	0	0	0	0	0	0	0	0	0	0	1
	ENSMUSG00000018481.10	Appbp2	0.108859	5.9552	1.22444	0.274113	0.632204	447	439.67	133.3	330.98	296	480	327	524	343	448	255
	ENSMUSG00000018486.3	Wnt9b	-0.646228	-0.030392	0.972302	0.330683	0.694971	2	7	4	4	8	3	2	1	8	2	2
	ENSMUSG00000018500.3	Adora2b	-0.129038	3.61624	0.46493	0.498687	0.835693	74	58	30	50	48	85	56	100	32	64	20
	ENSMUSG00000018501.18	Ncor1	0.0128271	7.90885	0.0200791	0.887921	1	1885	1818	501	1202	1301	1999	1332	1897	1386	1433	1077
	ENSMUSG00000018507.17	Trpv2	-0.462548	5.18399	7.77492	0.00938325	0.202448	316	354	179	325	331	308	254	351	172	206	172
	ENSMUSG00000018509.9	Cenpv	-0.0417219	1.82669	0.0297241	0.863857	1	36	25	7	14	19	22	28	20	13	21	15
	ENSMUSG00000018537.17	Pcgf2	0.113888	3.56139	0.565904	0.455636	0.803312	90	88	36	64	57	73	69	94	61	81	65
	ENSMUSG00000018541.11	Cwc25	0.05373	4.55649	0.209155	0.649534	0.94219	183	154	78	149	142	160	173	175	161	140	111
	ENSMUSG00000018543.9	1700001P01Rik	0.239827	-1.24789	0.0569448	0.821843	1	1	1	0	0	1	0	1	0	2	0	0
	ENSMUSG00000018547.9	Pip4k2b	0.0982641	5.76107	0.891449	0.349906	0.716717	460	476	167	302	327	492	394	489	421	322	334
	ENSMUSG00000018548.16	Trim37	0.047976	4.87234	0.188703	0.665983	0.946974	232	195	80	137	170	220	152	206	192	200	135
	ENSMUSG00000018554.14	Ybx2	0.124851	0.341467	0.0754484	0.784765	1	5	5	5	3	2	6	2	6	9	1	6
	ENSMUSG00000018559.17	Ctdnep1	0.0619179	5.65871	0.335556	0.565168	0.883333	476	364	113	267	274	421	394	428	291	297	220
	ENSMUSG00000018565.18	Elp5	0.092984	4.34708	0.569888	0.454064	0.803312	152	173	53	99	102	144	141	157	146	106	88
	ENSMUSG00000018566.15	Slc2a4	0.463605	4.80285	2.64826	0.119843	0.532782	246	149	32	85	94	236	178	340	165	134	121
	ENSMUSG00000018567.15	Gabarap	-0.227937	7.29482	5.38568	0.0246844	0.308296	1381	1518	517	1032	1055	1222	1066	1202	914	863	751
	ENSMUSG00000018569.13	Cldn7	-0.553101	-0.787101	0.579401	0.450344	0.803312	3	3	0	2	1	2	0	2	2	2	0
	ENSMUSG00000018570.18	2810408A11Rik	0.381232	0.119973	0.57943	0.450332	0.803312	4	2	1	3	5	4	6	7	5	1	2
	ENSMUSG00000018572.11	Phf23	0.0136211	5.28683	0.011672	0.914425	1	289	330	152	244	247	292	276	305	270	227	248
	ENSMUSG00000018574.15	Acadvl	0.0114753	5.51561	0.0106833	0.918116	1	307.95	308.37	158.29	226.98	311.89	337.29	262.68	368.42	270.22	301.76	220.61
	ENSMUSG00000018581.16	Dnah11	-0.397887	-0.836877	0.223197	0.638798	0.934095	2.13	1.07	1.1	0	3.22	1.06	2.09	0	2.12	0	1.03
	ENSMUSG00000018583.6	G3bp1	0.228424	7.29984	5.48773	0.0234288	0.299849	1122.68	1333.47	382.42	849.2	831.81	1063.06	1066.6	1225.83	1178.88	907	956.06
	ENSMUSG00000018585.10	Atox1	-0.257425	5.02238	2.39359	0.132	0.552728	224	191	51	188	166	223	164	257	91	171	55
	ENSMUSG00000018593.14	Sparc	-0.451402	10.0633	13.4668	0.000649936	0.0611173	14613	13485	3933	7101	7381	10325	7037	6576	6070	6450	6864
	ENSMUSG00000018595.7	Glra4	1.07737	-0.767511	2.09013	0.154878	0.594856	2	0	0	1	2	1	4	1	2	3	1
	ENSMUSG00000018599.6	Mief2	0.235372	4.27696	1.74203	0.196117	0.617516	150	110	88	101	125	130	168	158	112	113	157
	ENSMUSG00000018604.19	Tbx3	0.507981	4.47242	13.3957	0.000636359	0.0604402	163	118	40	100	87	130	159	144	141	122	160
	ENSMUSG00000018620.4	Mmp20	0	-1.62459	0	1	1	0	0	0	0	0	0	0	0	0	0	0
	ENSMUSG00000018634.11	Crhr1	2.10955	-1.5637	3.66045	0.0755808	0.449283	0	0	0	0	0	0	0	1	0	0	1
	ENSMUSG00000018648.16	Dusp14	-0.101738	4.13666	0.216417	0.644764	0.938609	62	39	11	26	35	68	27	73	23	46	18
	ENSMUSG00000018651.15	Tada2a	0.31362	3.4703	3.67978	0.0611524	0.428773	80	64	22	46	49	89	84	71	77	68	52
	ENSMUSG00000018654.18	Ikzf1	-0.0835401	6.62767	0.464932	0.499129	0.836279	903	1038	302	665	767	978	636	873	840	674	572
	ENSMUSG00000018656.6	Tcaf3	-0.488198	-1.4503	0.179471	0.673757	0.948098	0	0	0	0	1	1	1	0	0	0	0
	ENSMUSG00000018659.13	Pnpo	-0.295172	3.67675	3.58838	0.0643374	0.437669	74.27	63.53	39.59	77.32	80.25	83.79	52	90.8	48	63.55	41
	ENSMUSG00000018661.18	Cog1	-0.133981	5.1968	1.19364	0.280156	0.639061	280.75	248.52	88.26	240.4	220.96	296.54	240	341.56	168.28	209.88	104.96
	ENSMUSG00000018666.14	Cbx1	0.488455	5.41096	7.43903	0.0117845	0.223554	291	330	133	238	245	292	305	276	526	234	402
	ENSMUSG00000018669.15	Cdk5rap3	-0.102428	4.7807	0.461101	0.501043	0.837621	214	174	144	153	198.94	184	191	190	165	152	170
	ENSMUSG00000018672.16	Copz2	-0.349574	3.47912	4.45336	0.040174	0.364528	110	84	29	55	91	89	61	76	44	67	48
	ENSMUSG00000018677.10	Slc25a39	-0.554913	5.02904	13.1822	0.000873515	0.0687082	267	292	89	230	264	266	180	257	90	216	74
	ENSMUSG00000018678.14	Sp2	-0.249649	4.47644	2.73132	0.105199	0.521736	214	184	42	133	114	216	129	196	96	141	62
	ENSMUSG00000018697.15	Aatf	0.123481	4.70203	0.414724	0.52541	0.85731	183	199	115	155	174	159	163	183	217	145	205
	ENSMUSG00000018698.16	Lhx1	-1.26013	-1.59352	1.51468	0.271182	0.628623	0	0	0	0	1	0	0	0	0	0	0
	ENSMUSG00000018707.14	Dync1h1	0.0454245	10.0563	0.236679	0.628872	0.926879	8095.99	8490.29	3383.36	6407.06	6752.75	7423.28	6887.29	8693.79	7569.97	6087.8	6006.6
	ENSMUSG00000018727.20	Cpsf4l	0.446038	-0.142429	0.859615	0.358576	0.72584	5	6	3	4	2	5	9	8	4	5	3
	ENSMUSG00000018733.11	Pex12	0.0183447	3.24665	0.0133485	0.940834	1	67	53	16	44	44	76	45	63	46	56	38
	ENSMUSG00000018736.15	Ndel1	0.173911	6.47536	2.7182	0.105868	0.523142	524	439	131	346	393	544	397	693	396	481	261
	ENSMUSG00000018740.15	Slc25a35	-0.0377641	2.5745	0.029374	0.864653	1	46.71	30.82	14.57	17.72	14.23	45.09	29.74	42.46	24.65	24.36	15.79
	ENSMUSG00000018750.15	Zbtb4	0.320247	6.22543	8.47333	0.00549062	0.157308	589	507	164	410	387	544	569	574	568	424	484
	ENSMUSG00000018752.20	Tnfsfm13	-0.00945141	2.19953	0.00167886	0.96749	1	50.78	32.04	16.6	27.92	20.54	39.74	32.27	35.29	35.85	14.18	35.06
	ENSMUSG00000018761.15	Mpdu1	-0.292378	4.59401	5.68727	0.0211676	0.287472	210	187	55	156	167	197	139	199	109	134	81
	ENSMUSG00000018765.6	Fxr2	0.284496	5.81809	4.32011	0.0448467	0.379124	385	373	225	325	316	355	384	444	450	311	465
	ENSMUSG00000018770.10	Atp5g3	0.132723	6.26941	1.45543	0.233686	0.628623	580	507	242	458	458	553	526	555	519	481	477
	ENSMUSG00000018774.14	Cd68	-0.565993	6.66742	4.21078	0.0540394	0.414721	1126	1037	158	819	671	1167	644	1022	378	483	230
	ENSMUSG00000018776.11	Slc35g3	0.898044	-1.11456	0.820871	0.36954	0.737356	3	0	0	0	0	0	1	0	2	2	0
	ENSMUSG00000018796.14	Acsl1	0.133708	7.31825	1.89269	0.175409	0.617516	794.47	761.18	206.27	564.49	621.73	899.24	636.35	926.73	675.54	674.85	517.26
	ENSMUSG00000018800.15	Abca5	0.313324	4.72984	4.67027	0.0358082	0.347763	130	114	30	78	81	193	100	175	145	116	92
	ENSMUSG00000018809.3	Smyd4	-0.0366486	3.03161	0.0375016	0.847281	1	50	52	35	51	61	59	42	54	55	49	55
	ENSMUSG00000018819.11	Lsp1	-0.156259	7.10954	2.06546	0.157283	0.600566	1194	1361	461	997	964	1147	995	1090	939	839	714
	ENSMUSG00000018820.14	Zfyve27	0.0603844	5.39751	0.209787	0.649147	0.941988	311	331	178	248	245	219	272	310	257	259	278
	ENSMUSG00000018821.4	Avpi1	-0.076547	4.71339	0.200613	0.657111	0.946701	149	137	76	108	121	106	130	156	80	131	77
	ENSMUSG00000018822.8	Sfrp5	-0.212081	3.08787	1.25052	0.269126	0.628623	96	81	30	64	66	52	65	81	35	62	41
	ENSMUSG00000018830.11	Myh11	-0.140813	4.99549	0.714838	0.404627	0.766416	269	239	113	239	192	255	178	192	272	118	217
	ENSMUSG00000018841.18	Rad51d	-0.408307	3.62554	7.68964	0.007934	0.18749	104	102	34	75	81	88	59	88	48	68	43
	ENSMUSG00000018844.7	Fndc8	0.460389	-0.385816	0.695694	0.408447	0.769479	4	4	1	4	0	4	4	8	4	3	1
	ENSMUSG00000018845.15	Unc45b	0.443664	4.55263	6.85058	0.0133998	0.235563	206.79	125.55	85.88	117.69	129.91	176	159.78	241.88	187.97	157	212.79
	ENSMUSG00000018846.9	Pank3	0.0985398	6.38599	0.964224	0.331145	0.695463	529	444	148	408	422	667	365	680	421	497	345
	ENSMUSG00000018848.5	Rars	0.361488	5.841	8.86891	0.00457318	0.146085	362	430	140	292	253	371	335	443	524	279	367
	ENSMUSG00000018849.7	Wwc1	0.359488	4.28914	6.37434	0.0150066	0.245741	80	90	34	77	63	74	84	108	92	81	83
	ENSMUSG00000018858.16	Mrpl58	-0.302669	4.03893	4.35864	0.0422588	0.37185	132	177	49	104	127	120	99	132	88	110	55
	ENSMUSG00000018861.9	Fdxr	0.0934779	2.78362	0.198807	0.657729	0.946749	57	54	28	45	42	36	70	40	49	46	31
	ENSMUSG00000018862.12	Otop3	-0.0357408	3.14418	0.0192057	0.904225	1	7	18	5	8	14	18	14	17	12	6	8
	ENSMUSG00000018865.10	Sult4a1	-0.392011	-0.989144	0.210466	0.648513	0.941761	0	2	1	3	2	1	0	4	2	0	0
	ENSMUSG00000018868.5	Pnpla5	-0.29606	3.69102	1.54255	0.225494	0.628623	80	70	52	84	95	80	65	118	26	91	36
	ENSMUSG00000018882.13	Mrpl45	-0.18875	3.90352	2.02627	0.161194	0.608065	116	112	38	92	104	102	69	113	71	95	66
	ENSMUSG00000018893.16	Mb	0.691217	8.29265	10.761	0.00379657	0.134714	2315	1422	624.06	925	1318	2279	2459	2754.62	2430	1833.45	2039
	ENSMUSG00000018899.18	Irf1	0.0923533	8.60993	0.333383	0.568956	0.886106	3343.3	3601.77	1295.23	3109.71	2842.41	2961.67	3191.95	3826.89	3871.66	2031.76	2440.47
	ENSMUSG00000018900.8	Slc22a5	-0.374634	3.51659	6.53215	0.0138823	0.238523	98.46	81.43	38.27	68.34	74.41	103.91	49.22	86.8	51.01	57.24	55.99
	ENSMUSG00000018906.15	P4ha2	-0.0377505	3.94424	0.0583419	0.810185	1	148	117	58	77	96	105	117	105	86	86	93
	ENSMUSG00000018907.11	Alox12e	0.334983	5.54032	3.60068	0.0673676	0.447315	92	104	40	56	69	92	116	139	93	64	69
	ENSMUSG00000018909.16	Arrb1	-0.0247366	7.02081	0.0695907	0.793085	1	1030	967	403	836	891	996	822	1038	821	770	758
	ENSMUSG00000018914.6	Il3	1.3889	-1.62443	1.91574	0.208944	0.617516	0	0	0	0	0	0	0	1	0	0	0
	ENSMUSG00000018916.6	Csf2	0.68157	-1.11362	0.396344	0.532027	0.862141	1	0	0	0	0	1	2	1	0	0	0
	ENSMUSG00000018919.11	Tm4sf5	-0.323657	-0.984409	0.150873	0.699454	0.962603	3	1	2	3	0	0	2	0	2	1	1
	ENSMUSG00000018920.12	Cxcl16	-0.0274812	6.07226	0.0420658	0.838651	1	511.11	605.81	234.49	520.3	455.51	502.16	449.77	505.71	495.62	417.93	449.27
	ENSMUSG00000018921.12	Pelp1	0.0674424	5.23526	0.363901	0.549243	0.873603	271	310	123	209	205	243	247	298	227	228	203
	ENSMUSG00000018923.14	Med11	-0.651157	3.90411	9.9285	0.00366126	0.133132	91	97	78	122	119	102	66	101	65	71	45
	ENSMUSG00000018924.7	Alox15	-0.366974	1.1615	0.760506	0.388306	0.754436	13	8	8	9	8	11	1	15	4	10	8
	ENSMUSG00000018925.4	Heatr9	0.0662159	-0.155135	0.0179022	0.905039	1	3	4	0	4	5	6	3	5	5	4	2
	ENSMUSG00000018927.4	Ccl6	0.12488	6.41424	0.477412	0.496947	0.833906	651	729	167	548	395	837	595	982	562	383	446
	ENSMUSG00000018930.4	Ccl4	-0.490706	4.17614	2.18186	0.155775	0.596579	118	149	67	148	103	103	83	154	57	117	27
	ENSMUSG00000018931.4	Natd1	-0.176238	4.35558	1.78278	0.188229	0.617516	140	139	39	109	100	128	98	152	74	96	65
	ENSMUSG00000018932.10	Map2k3	0.120013	6.61098	1.41976	0.239415	0.628623	660	549	251	489	541	645	546	818	532	631	376
	ENSMUSG00000018965.12	Ywhah	0.0931335	7.07828	0.668912	0.417552	0.776237	1051	1358.04	361	795	794.9	1030.9	864	1064	1171.85	738.86	834.88
	ENSMUSG00000018974.8	Sart3	-0.0984293	5.2339	0.505515	0.48107	0.820709	275	285	192	240	265	245	245	283	248	212	240
	ENSMUSG00000018983.10	E2f2	-0.153712	4.91699	1.35675	0.249969	0.628623	217	215	102	196	219	191	157	173	179	195	158
	ENSMUSG00000018986.11	Slfn3	0.0490366	3.2563	0.0853723	0.771429	1	87	95.87	20	62	69.64	80.58	65.77	96.71	77.09	59.75	52.87
	ENSMUSG00000018995.13	Nars2	0.43648	3.3981	8.26865	0.00604004	0.164486	47	72	24	48	59	64.91	75	80	66	64	68
	ENSMUSG00000018999.15	Slc35b4	-0.19669	5.15619	2.86152	0.0973318	0.500995	317.31	265.74	67.43	225.24	234.52	298.45	212.17	293.71	171.48	194.1	136.95
	ENSMUSG00000019027.9	Dnah1	-0.660304	0.311123	2.38994	0.128815	0.54661	8	6	4	8	8	16	7	6	6	3	4
	ENSMUSG00000019039.15	Dalrd3	-0.423167	4.10625	8.45519	0.00553711	0.158118	126.85	127.65	55.12	118.04	90.12	122.7	97.12	128.05	73.24	69.11	43.37
	ENSMUSG00000019054.14	Fis1	-0.0542612	5.4873	0.260993	0.611827	0.915175	355	342	166	298	284	332	274	350	283	281	262
	ENSMUSG00000019055.16	Plod1	-0.374455	5.97719	13.1535	0.000703669	0.0627574	564	604	262	493	474	516	411	538	351	325	304
	ENSMUSG00000019066.14	Rab3d	0.00802423	6.60049	0.0054506	0.94146	1	474	475	172	363	399	475	428	643	305	409	239
	ENSMUSG00000019080.9	Mfsd3	-0.340501	1.9287	1.72862	0.194956	0.617516	38.18	18.36	13	13.55	25	30.96	16	31.16	14.27	24.71	7.23
	ENSMUSG00000019082.19	Slc25a22	-0.0132035	5.69759	0.0112274	0.916066	1	458	497	154	373	346	399	432	527	363	326	214
	ENSMUSG00000019087.14	Atp6ap1	-0.203379	6.73443	4.12563	0.0479058	0.391687	873	766	231	559	636	900	512	926	523	520	380
	ENSMUSG00000019088.15	Dnase1l1	-0.0247669	4.65403	0.0370332	0.848225	1	215	171	54	177	177	239	166	242	187	118	124
	ENSMUSG00000019102.11	Aldh3a1	0.190594	5.2623	2.33139	0.13348	0.554904	273	266	69	225	178	270	234	344	227	207	189
	ENSMUSG00000019122.9	Ccl9	-0.0300605	6.13525	0.0387539	0.845378	1	546	556	133	453	420	648	430	824	385	395	231
	ENSMUSG00000019124.11	Scrn1	-0.252742	2.51877	1.43039	0.23769	0.628623	74	51	14	34	53	52	30	43	21	45	48
	ENSMUSG00000019132.12	BC005537	0.146779	8.86801	2.08441	0.155431	0.595858	3641	3521	1082	2756	2859	4128	3084	4188	3745	2753	2476
	ENSMUSG00000019139.11	Isyna1	-0.44098	3.94505	9.08749	0.00413712	0.139651	132	141	53	102	116	146	102	132	76	84	39
	ENSMUSG00000019143.16	Hars2	-0.117571	4.26592	0.90769	0.345594	0.711149	137	104.14	50	109	132	144.26	96	134.11	109	108.09	76
	ENSMUSG00000019146.3	Cacng2	2.12244	-1.47796	3.15791	0.0827892	0.466599	0	0	0	0	0	0	1	0	1	0	0
	ENSMUSG00000019158.10	Tmem160	-0.423934	3.99927	1.75617	0.200523	0.617516	94	144	152	147	159	93	111	94	102	97	135
	ENSMUSG00000019173.12	Rab5c	0.0284574	7.83729	0.064247	0.801009	1	1975	2251	651	1422	1292	1782	1839	1996	1625	1253	1170
	ENSMUSG00000019178.18	Styxl1	-0.952946	-1.2941	0.804413	0.374341	0.741827	0	0	2	0	1	2	1	1	0	0	0
	ENSMUSG00000019179.11	Mdh2	-0.259127	6.50356	4.93558	0.031154	0.331764	719	557	297	488	540	693	482	768	337	512	293
	ENSMUSG00000019188.17	H13	-0.147398	6.64367	2.33255	0.133386	0.55478	802	807	404	658	711	780	630	891	596	612	520
[truncated: 32,668 more rows]

## Sheet: b DEGs n=291
DEGs n=291 (q<0.05 filter applied to a)	ensembl_ID	GeneID	logFC	logCPM	F	PValue	FDR	6NGrp1Ms1	6NGrp1Ms2	6NGrp1Ms3	6NGrp1Ms4	6NGrp1Ms5	6NGrp1Ms6	6NNNTKOGrp2Ms1	6NNNTKOGrp2Ms2	6NNNTKOGrp2Ms3	6NNNTKOGrp2Ms5	6NNNTKOGrp2Ms6
	ENSMUSG00000000168.11	Dlat	0.519689	5.58489	15.3116	0.00033912	0.0447007	366	350	109	247	231	346	399	343	484	254	401
	ENSMUSG00000000532.12	Acvr1b	0.492776	6.47398	18.3913	8.85822e-05	0.0240705	528	530	232	440	414	493	646	626	739	442	623
	ENSMUSG00000000628.11	Hk2	0.400454	7.10574	16.3917	0.000190758	0.0343707	1098	986	384	667	713	955	992	1145	1058	1053	958
	ENSMUSG00000000753.16	Serpinf1	-0.615448	6.93671	16.3281	0.000406741	0.0494535	1568	1149	362	844	877	1209	740	951	340	823	388
	ENSMUSG00000000787.13	Ddx3x	0.608512	8.40814	31.47	1.03835e-06	0.0032724	2177	2281	490	1482	1438	2373	2100	2828	2975	2124.26	2245
	ENSMUSG00000001270.10	Ckb	-0.652528	5.76497	24.7905	1.17297e-05	0.00812508	475.59	563.64	239	630.85	438.88	480.83	330.89	407.81	269	266.23	268.95
	ENSMUSG00000001348.16	Acp5	-0.611729	4.80599	20.8345	3.59624e-05	0.015333	325	288	113	209	200	206.96	152	214	124	135	119
	ENSMUSG00000001750.17	Tcirg1	-0.49692	6.99347	16.4813	0.000211721	0.0359791	1176	1298	640	1099	1143	1115	835	1162	656	845	542
	ENSMUSG00000001751.10	Naglu	-0.602527	3.96521	18.3512	8.99325e-05	0.0240705	139	153	49	124	115	132	83	125	62	75	52
	ENSMUSG00000001930.18	Vwf	-0.455093	5.87119	16.3461	0.000194192	0.0343707	583	502	241	541	522	537	332	452	316	342	357
	ENSMUSG00000002458.14	Rgs19	-0.61942	4.94119	17.1766	0.000178935	0.0343291	236	270	161	237	236	277	176	273	123	166	89
	ENSMUSG00000002797.10	Ggct	0.617961	5.71389	16.1145	0.000308203	0.0422312	114	152	57	89	108	122	141	208	255	105	121
	ENSMUSG00000003032.9	Klf4	0.507123	7.93925	17.3576	0.000151081	0.0321321	1192	1165	263	721	698	1179	1283	1485	1185	1043	914
	ENSMUSG00000003378.10	Grik5	-0.608947	3.415	15.694	0.000250974	0.0370235	119	103	44	86	74	89	70	74	47	56	38
	ENSMUSG00000003812.14	Dnase2a	-0.506949	5.37974	15.63	0.00025742	0.0374958	207.61	210.55	132.03	214.13	238.11	244.12	162.3	217.69	119.76	172.95	98.26
	ENSMUSG00000006362.17	Cbfa2t3	-0.587343	4.85785	23.9036	1.21875e-05	0.00812508	254.51	296.21	107.86	274.96	221.39	301.58	167.91	191.74	133	199	119.81
	ENSMUSG00000007656.14	Arpp19	0.556794	5.8197	19.7128	5.61905e-05	0.0182052	382	332	84	236	227	427	326	394	498	320	404
	ENSMUSG00000007891.17	Ctsd	-0.527529	8.79858	26.0567	5.88061e-06	0.00657623	3245	3248	1510	3131	3196	3713	2130.22	3403	1673.31	2270	1422.71
	ENSMUSG00000008035.13	Mid1ip1	0.427142	5.89016	16.7888	0.000163439	0.0336394	405	458.26	140.39	303.3	287.61	392	481	498	443	430.66	342
	ENSMUSG00000008668.16	Rps18	0.562234	8.49118	24.9346	8.57175e-06	0.00742892	2404.56	2287.5	796.05	1752.6	1974.01	2139.66	2626.04	2762.9	3376.22	1965.17	2830.59
	ENSMUSG00000012017.5	Scarf2	-0.537367	4.7295	14.6439	0.000381918	0.047972	262	295	149	196	249	250	174	187	128	205	134
	ENSMUSG00000012350.16	Ehf	0.631749	4.3977	15.7685	0.000243692	0.0367822	41	42	9	33	33	71	52	73	67	56	41
	ENSMUSG00000013483.15	Card14	0.847178	5.67108	41.8637	7.16282e-08	0.000827712	290.42	264.16	111.16	155.01	164.69	213.62	353.12	413.36	326.51	397.66	307.64
	ENSMUSG00000014956.16	Ppp1cb	0.454779	7.83079	22.2282	2.18562e-05	0.0116047	1321.57	1158.97	442.89	998.99	1023.04	1607.2	1197.21	1704.1	1711.85	1334.05	1348.62
	ENSMUSG00000015749.13	Anp32e	0.466681	5.89613	15.3489	0.000287838	0.0403453	420	435	155	316	339	408	452	443	554	366	504
	ENSMUSG00000016349.11	Eef1a2	0.880876	6.52088	18.7121	0.000328581	0.0438112	782	567	194	326	353	698	867	1060	885	569	893
	ENSMUSG00000016921.15	Srsf6	0.399441	7.48639	15.3168	0.000291544	0.0405902	1127	1139	366	858	901	1205	1079	1209	1501	1099	1070
	ENSMUSG00000017204.5	Gsdma	0.888265	4.51213	17.6396	0.000117809	0.0272271	22	21	5	15	13	18	31	52	22	16	25
	ENSMUSG00000017760.17	Ctsa	-0.402871	7.12986	15.4672	0.000274605	0.0393378	1049.86	983.37	285.26	809.27	867.35	1139.64	709.56	985	551.48	575.99	401.35
	ENSMUSG00000017776.16	Crk	0.514175	7.29552	26.909	4.43549e-06	0.00591404	1076	1052	347	848	783	1055	1086	1301	1459	1005	1130
	ENSMUSG00000018143.11	Mafk	0.472283	6.14398	17.474	0.000125509	0.0282534	507	494	226	421	376	447	607	651.95	647	465	514.95
	ENSMUSG00000019487.12	Trip10	0.605872	5.36996	22.2788	2.14696e-05	0.0116047	318	342	104	187	229	267	345	368	397	267	396
	ENSMUSG00000019577.7	Pdk4	1.10897	7.40331	20.3658	0.000230497	0.0367822	862	528	183	730	389	866	1187	1292	1165	1576	923
	ENSMUSG00000019761.11	Krt10	0.649639	12.3562	28.4223	2.71132e-06	0.00469967	13106	13959	5493	8957	10397	13718	17699	20306	21463	10831	15224
	ENSMUSG00000019996.18	Map7	0.461902	5.31834	16.5968	0.000176099	0.0342968	169	163	49.63	131.93	129	176	171.88	207	184	196	160
	ENSMUSG00000020250.12	Txnrd1	0.383997	7.01553	15.3024	0.00029322	0.0406602	866	974	318	660	736	849	910	1028	1155	853	778
	ENSMUSG00000020664.11	Dld	0.564364	5.84809	19.8007	5.80187e-05	0.0183039	420	337	70	254	254	434	349	468	513	334	384
	ENSMUSG00000020892.11	Aloxe3	0.845423	6.06976	25.4285	7.94936e-06	0.00742892	35	47	15	29	29	41	51	126	54	37	35
	ENSMUSG00000020893.18	Per1	0.534143	6.7178	16.9919	0.000214058	0.036023	822	816	294	616	593	659	929	1324	975	739	689
	ENSMUSG00000020913.4	Krt24	0.816081	8.03762	33.2281	2.28869e-06	0.00460793	389	399	198	292	376	436	659	845	795	337	505
	ENSMUSG00000020994.6	Pnn	0.44913	5.38579	14.4252	0.000417282	0.049711	263	317	115	203	248	325	319	335	413	255	319
	ENSMUSG00000021135.9	Slc10a1	1.16372	1.54641	15.8008	0.000240596	0.0367822	11	6	3	7	8	12	22	16	10	26	13
	ENSMUSG00000021340.14	Gpld1	0.580711	4.52538	17.2462	0.000136978	0.0300544	88.89	76.02	27.41	68.26	59.74	80.33	118.06	100.65	91.21	79.62	98.73
	ENSMUSG00000021375.12	Kif13a	0.451117	6.36461	18.7863	7.63718e-05	0.0219088	606	515	193	398	428	625	631	708	652	529	556
	ENSMUSG00000021537.10	Cetn3	0.81234	4.45759	19.3648	0.00013557	0.0299352	145	174.96	42	91	62	131.96	173	166	263	125	177
	ENSMUSG00000021939.9	Ctsb	-0.499979	10.2131	16.8881	0.00016117	0.0334567	10430.1	11279.1	4105.48	10360.8	10162.4	11046.3	6990.89	10843.5	5681.13	6882.71	4451.04
	ENSMUSG00000022357.3	Klhl38	1.05267	2.76087	20.4588	5.21833e-05	0.0179087	61.07	36.07	10.32	12.87	16.23	43.92	62.79	107.76	66.31	31.26	40.09
	ENSMUSG00000022358.8	Fbxo32	0.932829	6.89397	32.2642	7.95673e-06	0.00742892	881.97	611.94	243.41	390.88	388.93	987.85	974.86	1423.44	1163.96	792.89	1009.96
	ENSMUSG00000022419.17	Deptor	0.533872	6.36563	23.7909	1.26697e-05	0.00828719	571	463.88	146.81	327.88	363.8	663	534.76	714.93	692	512.93	488
	ENSMUSG00000022439.10	Parvg	-0.642851	4.03474	16.861	0.000158931	0.0333048	157	181	80	172	171	170	100	133	87	100	88
	ENSMUSG00000022483.18	Col2a1	-1.491	3.03564	22.5794	9.15074e-05	0.0240705	172	68	57	57	80	58	26	41	13	35	34
	ENSMUSG00000022504.11	Ciita	-0.544231	6.15387	15.6245	0.000368655	0.0469859	608	653	254	569	589	602	378	497	387	384	262
	ENSMUSG00000022510.15	Trp63	0.635494	7.42173	31.158	1.14345e-06	0.00330333	942	709	173	518	543	1005	922	1296	875	1034	684
	ENSMUSG00000022698.18	Naa50	0.60205	7.03566	16.8156	0.000325878	0.0437877	988	758	147	554	542	1132	787	1166	1128	897	855
	ENSMUSG00000022884.17	Eif4a2	0.519429	7.54398	18.6752	9.19912e-05	0.0240705	1142.13	1174.69	366.4	943.72	918.87	1197.13	1121.3	1237.49	1818.09	1080.93	1330.64
	ENSMUSG00000022893.15	Adamts1	0.477978	6.5047	17.9206	0.00010585	0.0257479	621	715	198	483	474	589	634	890	786	666	554
	ENSMUSG00000022895.17	Ets2	0.420233	7.21742	20.7925	3.65133e-05	0.015333	866	807	255	692	621	857	843	1273	942	821	665
	ENSMUSG00000022951.17	Rcan1	0.473472	6.25643	20.9693	3.42542e-05	0.0152242	543	441	182	365	367	479	580	600	534	641	382
	ENSMUSG00000023050.10	Map3k12	-0.554145	4.53516	14.5172	0.000401998	0.0494447	211.4	169.75	78.61	184.88	162.87	182.73	83.56	173.43	79.58	165.61	76.09
	ENSMUSG00000023150.15	Ivns1abp	0.373753	7.61574	14.5509	0.000396562	0.0492746	1164.22	1124.58	410.72	837.52	862.9	1307.46	1058.54	1329.09	1393.48	1087.33	1140.9
	ENSMUSG00000024013.16	Fgd2	-0.642657	5.24967	19.177	0.000100702	0.0251154	336	448	180	400	363	367	274	330	171	183	195
	ENSMUSG00000024045.7	Akap8	0.406811	6.7344	16.6058	0.000175481	0.0342968	787	741	285	532	547	775	789	852	940	630	759
	ENSMUSG00000024187.16	Fam234a	-0.480362	5.95937	14.671	0.000377768	0.0479709	371	348	195	363	359	415	238	412	178	313	154
	ENSMUSG00000024210.4	Ip6k3	0.712052	3.38102	17.2207	0.000138327	0.0301596	79	73	24	40	45	67	100	106	86	85	65
	ENSMUSG00000024294.15	Mib1	0.377678	7.48957	16.4002	0.000190126	0.0343707	1228	1090	354	983	925	1339	1067	1472	1351	1193	1137
	ENSMUSG00000024669.9	Cd5	-0.753212	2.93038	16.6317	0.00017372	0.0342968	53	75	31	40	56	72	25	34	34	42	27
	ENSMUSG00000024910.6	Ctsw	-0.782616	3.12682	15.6491	0.00025548	0.0374958	77	69	37	66	86	98	49	77	28	52	13
	ENSMUSG00000025066.11	Sfr1	0.42987	6.02386	16.0522	0.000217901	0.0361434	460	407	132	277	286	502	414	470	541	382	415
	ENSMUSG00000025103.9	Btbd1	0.448077	6.01982	16.165	0.000208462	0.035776	488.85	416.37	135.44	273.25	279.45	518.13	379.16	547.64	574.21	392.27	420.45
	ENSMUSG00000025151.17	Maged1	-0.402129	6.08099	16.6187	0.000174605	0.0342968	680	651	223	444	499	587	402	533	303	427	285
	ENSMUSG00000025193.15	Cutc	0.782176	2.97874	14.4765	0.000412913	0.049531	50	65	19	34	46	39	70	55	81	46	97
	ENSMUSG00000025579.15	Gaa	-0.448354	5.5776	16.2386	0.000202535	0.0352828	493	457	149	322	322	442	271	418	206	274	175
	ENSMUSG00000025813.15	Homer2	0.571115	5.91395	21.7773	2.56454e-05	0.0123479	218.55	164.91	49.81	124.76	132.58	243.61	213.12	318.98	222.85	184.86	185.88
	ENSMUSG00000025898.7	Cwf19l2	0.447845	5.33122	15.1437	0.000312407	0.0426386	257	224	63	170	200	331	220	308	340	253	235
	ENSMUSG00000025921.8	Rdh10	0.576098	4.17002	17.9117	0.000106209	0.0257479	104	117	43	66	60	116	113	150	130	118	111
	ENSMUSG00000026020.10	Nop58	0.534583	5.92304	22.7177	1.83978e-05	0.01063	372	423	149	291	328	422	400	466	605	418	454
	ENSMUSG00000026034.18	Clk1	0.492006	7.22328	19.4207	6.03121e-05	0.0188364	837	687	171	564	627	916	786	1010	1066	701	684
	ENSMUSG00000026234.13	Ncl	0.451238	8.50273	19.5227	5.80792e-05	0.0183039	2745	2535	951	1861	2056	2678	2495	2983	3204	2742	2825
	ENSMUSG00000026235.15	Epha4	0.471711	5.21622	16.2013	0.000205518	0.0354463	125	112	33	88	95	134	123	168	109	149	116
	ENSMUSG00000026413.13	Pkp1	0.502036	9.95469	23.296	1.50362e-05	0.00914489	3628	3238	1118	2299	2477	3440	3899	5165	3904	3088	2897
	ENSMUSG00000026434.13	Nucks1	0.447831	7.77087	19.7009	5.4385e-05	0.0179087	1614	1531	424	1001.03	1108.33	1785.06	1382	1721.7	1832	1550.49	1556
	ENSMUSG00000026535.10	Ifi202b	0.949139	3.60409	15.9943	0.000359443	0.0463227	35	30	13	19	24	53	44	106	73	33	29
	ENSMUSG00000026596.14	Abl2	0.437202	7.58319	20.382	4.23777e-05	0.0163785	1560	1579	502	1143	1093	1538	1574	1844	1824	1362	1535
	ENSMUSG00000026603.14	Smyd2	0.454998	4.94392	16.8521	0.000159477	0.0333048	233.86	212.45	75.65	146.94	165.92	228.89	236.35	291.34	226.05	210.34	228.23
	ENSMUSG00000026638.16	Irf6	0.448637	6.62108	21.2245	3.12496e-05	0.0142543	400	357	119	290	280	430	374	637	431	438	259
	ENSMUSG00000026670.16	Uap1	0.5038	6.72241	20.3628	4.26755e-05	0.0163785	703	804	245	520	516	649	835	931	906	788	568
	ENSMUSG00000026775.10	Yme1l1	0.614657	6.79211	21.3688	5.30894e-05	0.0179087	759	663	173	502	422	779	716	797	1063	554	819
	ENSMUSG00000027077.8	Smtnl1	0.711704	4.60504	15.9403	0.0004085	0.0494535	236	132	42	90	104	170	187	239	218	142	217
	ENSMUSG00000027162.8	Lin7c	0.546063	6.34858	24.9421	8.55009e-06	0.00742892	426	446	109	310	310	506	412	552	552	454	474
	ENSMUSG00000027245.12	Hypk	0.584928	4.06656	14.6439	0.000381927	0.047972	140.42	94.02	41.57	91.76	65.44	127.4	113.84	142.93	172.19	97.42	152.53
	ENSMUSG00000027288.17	Zfp106	0.419967	8.73707	15.3421	0.000288621	0.0403453	3647	2773	913	2044	2195	3647	2982	4056	3448	2889	2926
	ENSMUSG00000027313.4	Chac1	0.811839	2.78042	15.511	0.00026986	0.0388184	38	29	12	24	26	35	60	85	36	37	27
	ENSMUSG00000027513.12	Pck1	-1.00395	2.42336	18.379	8.89944e-05	0.0240705	39	49	23	45	56	45	21	32	22	20	15
	ENSMUSG00000027919.6	Lce1g	1.95326	5.30296	31.9268	8.34114e-06	0.00742892	6	10	6	4	4	11	39	55.23	18	13	12
	ENSMUSG00000028064.18	Sema4a	-0.452932	6.07957	16.2703	0.000200031	0.0350226	504	581	218	380	441	534	383	537	265	295	192
	ENSMUSG00000028104.15	Polr3gl	0.738401	3.01811	14.4385	0.000415036	0.049614	63	48	20	38	28	56	75	70	91	33	73
	ENSMUSG00000028236.4	Sdr16c5	0.570232	5.39765	20.1937	4.53908e-05	0.0171039	115	101	41	112	93	109	128	179	188	131	88
	ENSMUSG00000028525.17	Pde4b	0.85297	6.22425	33.9985	2.42211e-06	0.00460793	557	468	97	264	328	502	552	925	674	647	422
	ENSMUSG00000028572.14	Hook1	0.606967	4.69856	18.2568	9.31927e-05	0.0240705	83.75	92	24	73	69.84	101	86	128.9	143	96	97
	ENSMUSG00000028693.16	Nasp	0.515777	5.36234	15.9996	0.000222457	0.0362369	273	312	89	197	231	305	290	280	415	272	343
	ENSMUSG00000028744.16	Slc66a1	-0.59813	3.86587	14.5196	0.000401614	0.0494447	137	101	62	87	107	109	68	121	43	71	45
	ENSMUSG00000028749.8	Pla2g2f	0.713074	6.70563	19.6847	0.000126339	0.0282567	140	156	75	121	117	149	241	289	274	111	148
	ENSMUSG00000028834.14	Trim63	1.27976	5.23973	31.6665	1.63765e-05	0.00962244	241	162	105	164	138	207	455	527	475	263	371
	ENSMUSG00000028967.11	Errfi1	0.714191	6.74444	45.9253	1.76926e-08	0.000306675	716	771	195	467	504	737	749	1247	1130	852	581
	ENSMUSG00000029070.10	Mxra8	-0.414697	5.94449	16.4541	0.000186167	0.0343291	637	652	247	433	436	602	402	460.99	304	391	319.97
	ENSMUSG00000029095.18	Ablim2	0.714096	4.04701	17.8777	0.000128897	0.028644	155	100	34	51	62	139	137	170	127	115	155
	ENSMUSG00000029119.10	Man2b2	-0.616206	5.53083	27.4863	3.67142e-06	0.00578532	442	469	149	327	334	437	263	376	155	242	152
	ENSMUSG00000029131.15	Dnajb6	0.43794	6.21507	18.1742	9.61499e-05	0.0241926	481.92	483.65	179.9	342.44	375.72	490.75	495.47	567.72	593.37	412.75	533.54
	ENSMUSG00000029135.11	Fosl2	0.58222	8.10526	34.2566	4.46741e-07	0.00221245	1641	1848	553	1183	987	1467	1842	2399	1934	1705	1589
	ENSMUSG00000029156.12	Sgcb	0.448299	5.74083	15.0256	0.000327547	0.0438112	464	397	95	283	273	430	366	497	490	357	393
	ENSMUSG00000029321.2	Slc10a6	0.97801	3.49619	32.6972	7.13453e-07	0.00247333	54	47	21	41	40	50	83	124	108	49	58
	ENSMUSG00000029392.13	Rilpl1	0.793398	4.3453	24.8601	1.19756e-05	0.00812508	157.87	101.73	65.89	88.67	83.79	165.87	192.98	216.78	216.99	121.91	199.99
	ENSMUSG00000029422.16	Rsrc2	0.519814	5.78531	16.6509	0.000181644	0.0343291	307	290	65	233	202	440	302	433	440	277	294
	ENSMUSG00000029545.14	Acads	-0.673185	3.72014	14.9153	0.000342368	0.0449578	87	113	69	89	117	104	64	103	60	66	31
	ENSMUSG00000029814.11	Igf2bp3	-0.807758	2.40232	14.612	0.00038687	0.0483798	48.04	47.08	17.03	32.96	29.15	62.83	15.64	41.15	21.19	25.75	10.21
	ENSMUSG00000029998.15	Pcyox1	0.412804	6.7919	17.0327	0.000148722	0.0318257	594	541	180	385	399	610	597	735	653	469	488
	ENSMUSG00000030091.18	Nup210	-0.50663	5.38566	20.7445	3.71527e-05	0.015333	440	518	150	303	371	456	243	366	238	256	203
	ENSMUSG00000030177.15	Ccdc77	0.579859	3.55269	16.726	0.000167475	0.0339524	76.05	63.07	23.39	52.1	47	71	76.1	93.26	96.1	73.44	69.34
	ENSMUSG00000030468.13	Siglecg	-1.03349	2.50408	24.5521	9.76095e-06	0.00755858	59	60	27	39	46	49	23.48	33	16	30	14
	ENSMUSG00000030577.15	Cd22	-0.844375	2.61561	17.6438	0.000117619	0.0272271	48.74	58	29	38.72	50	69	29	38	21	30	20.54
	ENSMUSG00000030753.16	Thap12	0.402802	6.3926	14.6051	0.000387965	0.0483798	649	452	135	333	409	637	503	752	549	515	457
	ENSMUSG00000030852.19	Tacc2	0.614008	9.02658	26.4641	5.6873e-06	0.00657205	3901	2381	911	1597	1869	3178	3531	4830	2910	3351	2606
	ENSMUSG00000030942.9	Thumpd1	0.628271	5.3562	27.1294	4.1259e-06	0.00591404	290	309	82	218	199	256	318	328	403	279	347
	ENSMUSG00000031176.9	Dynlt3	0.786749	6.06266	23.4286	5.15822e-05	0.017882	339	301	60	179	189	391	347	432	513	278	384
	ENSMUSG00000031299.11	Pdha1	0.410936	7.13588	15.3789	0.000284417	0.0402444	1107.28	939.71	319.63	678.32	773.14	1061.76	911.78	1130.67	1208.66	863.49	1081.58
	ENSMUSG00000031601.17	Cnot7	0.450139	5.16071	15.9975	0.000222646	0.0362369	244	221	54	176	167	271.95	212	304	307	223	200
	ENSMUSG00000031711.8	Zfp330	0.525374	4.84462	18.7829	7.64694e-05	0.0219088	175.37	180	58	114.53	120.85	196.52	187.59	225.64	251.41	159	166.77
	ENSMUSG00000031757.8	Mt4	0.745496	6.15569	34.2379	5.7271e-07	0.00246491	251	273	101	214	227	249	395	513	388	216	336
	ENSMUSG00000031903.8	Pla2g15	-0.544096	4.89538	18.7116	7.85398e-05	0.0223175	265	269	122	266	278	265	198	231	156	151	124
	ENSMUSG00000032093.8	Cd3e	-0.842008	3.16202	16.0159	0.000242262	0.0367822	60	117	30	54	67	88	42	63	25	46	20
	ENSMUSG00000032122.16	Slc37a2	-0.491098	6.16423	20.3425	4.29931e-05	0.0163785	577	580	195	537	554	615	349	516	304	373	279
	ENSMUSG00000032238.18	Rora	0.661662	8.62476	22.4366	4.59417e-05	0.0171254	1551	1357	289	835	909	1838	1463	2157	1873	1563	1339
	ENSMUSG00000032307.17	Ube2q2	0.430402	5.58314	17.7098	0.000114695	0.0272271	222.27	249.92	76.53	217.54	192.04	297.32	256.29	366.2	281.73	245.78	240.85
	ENSMUSG00000032436.18	Cmtm7	-0.635345	4.33502	19.1786	6.59777e-05	0.020083	195.94	180.93	77.75	151.86	162.83	160.69	105.86	179.85	69.85	110	54.95
	ENSMUSG00000032487.9	Ptgs2	0.863379	3.22747	15.0517	0.000411853	0.049531	49	50	11	26	33	38	45	97	60	78	35
	ENSMUSG00000032892.15	Rangrf	0.887575	2.50549	16.7571	0.000165462	0.0337417	29.29	26.18	12.43	19.28	29.77	45.91	51.26	36.41	67.35	30.5	56.21
	ENSMUSG00000033016.17	Nfatc1	-0.405716	6.52106	15.4413	0.000277448	0.0394961	829	823	247	617	555	939	505	819	385	497	321
	ENSMUSG00000033192.6	Lpcat2	-0.546698	4.63816	17.8002	0.000110812	0.0266772	143.25	144.07	90.95	133.85	175.31	172.51	102.14	142.14	96.31	98.54	73.25
	ENSMUSG00000033765.6	Calm4	0.678464	9.17491	26.1385	1.09121e-05	0.00772018	893	942	485	660	905	1032	1344	1817	1374	1051	1173
	ENSMUSG00000033863.3	Klf9	0.569183	6.84117	22.4644	2.35304e-05	0.0118869	936	758	213	516	539	1019	855	1319	965	916	701
	ENSMUSG00000034247.10	Plekhm1	-0.524373	6.67833	23.1708	1.5705e-05	0.009387	789.47	827.87	387.22	733.82	812.9	774	526.96	793.69	445.35	558.69	311.82
	ENSMUSG00000034255.18	Arhgap27	-0.459519	5.75864	17.643	0.000117657	0.0272271	383.17	440.91	211.07	390.97	384.18	374.84	296.44	353.73	249.11	250.27	222.63
	ENSMUSG00000034445.9	Cyb561a3	-0.548763	4.69681	16.3629	0.000192918	0.0343707	228.3	241.36	93.81	167.49	198.25	228.57	156.2	160.39	128.92	156.52	66.47
	ENSMUSG00000034485.11	Uaca	0.488287	6.7859	16.6308	0.000189735	0.0343707	926	665	321	533	622	922	898	935	925	842	943
	ENSMUSG00000034641.3	Cd300ld	-0.730814	4.35618	17.4963	0.000194325	0.0343707	205.17	178.13	66.39	187.39	182.45	217	94.11	189.16	96.09	111	46.1
	ENSMUSG00000034842.17	Art3	0.50659	5.35438	15.8499	0.000235978	0.0367822	331	278	63	156.01	186.01	340.03	291	471.06	343.02	234.02	214.03
	ENSMUSG00000034845.7	Plvap	-0.652023	6.45859	18.6383	0.000184544	0.0343291	706	804	406	897	828	730	471	753	369	548	328
	ENSMUSG00000035764.6	Fbxo45	0.413029	5.09131	14.9826	0.000333233	0.0441522	180	185	68	144	158	184	213	231	221	175	172
	ENSMUSG00000035770.9	Dync1li2	0.434257	6.69865	15.1803	0.000307868	0.0422312	781	674.96	219.97	521.94	535.96	729	674	721.97	907	629.95	791.97
	ENSMUSG00000035783.10	Acta2	-0.574866	5.33982	30.0637	1.60874e-06	0.00398359	399	310	126	273	287	349	205	271	169	210	128
	ENSMUSG00000035851.15	Ythdc1	0.481944	6.464	18.3952	8.84547e-05	0.0240705	522	548	161	421	423.01	644	513	630	822	507	568
	ENSMUSG00000035923.5	Myf6	0.744158	4.20421	17.9697	0.000154545	0.0326684	124	93	42	81	80	128	141	134	206	119	143
	ENSMUSG00000036282.16	Naa30	0.53531	5.32339	18.1699	9.63042e-05	0.0241926	238	225	74	168	161	298	231	294	368	205	257
	ENSMUSG00000036371.7	Serbp1	0.457263	8.07228	22.451	2.02047e-05	0.011118	1527.92	1489.03	422.76	1173.86	1196.64	1720.09	1543	1921.95	1910.25	1435.04	1481.88
	ENSMUSG00000036390.9	Gadd45a	1.06672	3.75071	26.4103	1.39306e-05	0.00878059	61.16	75.43	17.7	56.36	48.41	64.93	97	89.87	157.67	81.24	117
	ENSMUSG00000036594.16	H2-Aa	-0.482638	7.60151	16.7251	0.000173133	0.0342968	1403	1638	564	1440	1443	1758	941	1484	887	1031	662
	ENSMUSG00000036596.7	Cpz	-0.984035	1.91121	16.2754	0.000199637	0.0350226	49	43	18	31	36	29	26	17	12	21	11
	ENSMUSG00000036599.11	Chst12	-0.710797	4.36943	25.3026	7.56998e-06	0.00742892	180	206	67	156	187	192	126	136	72	124	51
	ENSMUSG00000036918.17	Ttc7	-0.431317	6.97536	17.4784	0.000125298	0.0282534	915	962	448	825	906	932	641	834	492	762	459
	ENSMUSG00000037197.12	Rbm17	0.48117	4.98641	15.8057	0.000240128	0.0367822	263	242	66	180	164	237	251	274	295	201	264
	ENSMUSG00000038354.14	Ankrd35	0.566549	6.2694	19.8993	5.32941e-05	0.0179087	223	240	114	170	201	185	319	325	303	228	249
	ENSMUSG00000038560.8	Sp6	0.893069	3.9837	16.3547	0.000233147	0.0367822	21.45	21.68	17.71	28	11.75	29.93	48.15	60	45.78	20.42	33.06
	ENSMUSG00000038764.15	Ptpn3	0.70804	6.43723	26.1121	1.42258e-05	0.00880652	587	389	121	233	292	590	552	716	583	485	518
	ENSMUSG00000039153.18	Runx2	-0.477783	5.18716	16.4651	0.000185369	0.0343291	387.57	373.14	109.37	234.5	235.86	356.08	193.46	255.56	149.21	267.5	135.09
	ENSMUSG00000039735.17	Fnbp1l	0.586375	5.85375	27.4952	3.66085e-06	0.00578532	339	305	83	235	230	378	322	430	457	307	363
	ENSMUSG00000040127.14	Sdr9c7	0.828082	5.54457	19.0273	9.43468e-05	0.0240705	39	24	10	25	30	39	51	94	46	37	24
	ENSMUSG00000040268.18	Plekha1	0.455469	6.43102	14.8508	0.000351743	0.0456699	608	615	142	411	405	627	541	616	788	491	592
	ENSMUSG00000040432.6	Ltb4r2	0.647925	5.14274	24.3478	1.04656e-05	0.00755858	147	119	57	89	89	129	179	192	200	138	116
	ENSMUSG00000040479.13	Dgkz	-0.417512	6.55107	16.0685	0.000216509	0.0360852	834.83	836.86	384.67	770.4	719.3	768	600.44	804.36	424	519	441
	ENSMUSG00000041028.17	Ghitm	0.427563	6.85164	17.9569	0.000104404	0.0257479	846	711	233	556	578	818	716	877	980	673	788
	ENSMUSG00000041112.18	Elmo1	-0.540523	5.85696	19.7068	5.42672e-05	0.0179087	569.25	562.69	154.35	407.23	457.19	660.17	320.02	557.76	233.57	333.49	174
	ENSMUSG00000041782.15	Lad1	0.425625	6.65682	16.0744	0.000216015	0.0360852	395	394	178	331	311	337	479	545	425	401	370
	ENSMUSG00000041926.16	Rnpep	-0.544652	6.26912	24.4103	1.02444e-05	0.00755858	663.45	665.4	269.68	612.65	628.37	715.33	377.47	636.01	353.66	442.46	278.65
	ENSMUSG00000042447.14	Mios	0.520137	4.78404	14.7605	0.000364374	0.0466116	188	157	29	121	144	216	173	212	227	162	189
	ENSMUSG00000044574.6	5031434C07Rik	1.24132	3.50028	25.2258	3.68927e-05	0.015333	60	59	8	54	22	125	111	136	125	126	108
	ENSMUSG00000044811.14	Cd300c2	-0.860969	4.60856	24.1679	2.81729e-05	0.0131531	240	210.75	124.33	234	285.51	226	125.64	193	111	125.67	83
	ENSMUSG00000045394.10	Epcam	0.588186	4.47239	18.9685	7.13475e-05	0.0213225	65	78	22	56	71	70	98	125	74	87	70
	ENSMUSG00000045594.11	Glb1	-0.622643	3.93928	19.5511	5.74745e-05	0.0183039	128.51	151	53	115.56	123	127	83	109	63.37	79	50
	ENSMUSG00000045730.5	Adrb2	0.469235	4.68801	15.8135	0.000239391	0.0367822	146	149	70	113	137	131	144	230	167	164	170
	ENSMUSG00000046470.6	Sox18	-0.717274	3.73431	18.9147	7.27946e-05	0.021569	126	162	49	135	107	135	78	100	44	106	39
	ENSMUSG00000046676.5	Lce1l	2.00145	5.01035	33.6494	5.24144e-06	0.00648946	5	4	5	10	6	10	37	48	25	12	16
	ENSMUSG00000047547.15	Cltb	0.615504	7.36107	23.2469	2.4817e-05	0.0122013	903	992	404	636	603	679	1121	1055	1333	817	1058
	ENSMUSG00000047586.5	Nccrp1	1.07471	5.05851	22.9357	1.93734e-05	0.0108325	13	12	12	15	15	13	32	50	27	23	14
	ENSMUSG00000047675.16	Rps8	0.560998	8.72439	26.2305	5.55034e-06	0.00657205	2815.75	2903	803.1	1881.84	1959.34	2759.78	2964.37	3206.08	3850.23	2276.68	3080.77
	ENSMUSG00000047821.17	Trim16	0.455538	5.25293	15.945	0.000227294	0.0367822	269	225	85	148	153	236	250	340	236	238	203
	ENSMUSG00000048373.9	Fgfbp1	0.531046	5.38305	14.8483	0.000381622	0.047972	198	203	57	131	124	208	201	250	239	215	175
	ENSMUSG00000049299.15	Trappc1	-0.591245	3.96508	15.8592	0.000235112	0.0367822	129	131	36	108	109	135	68	121	53	74	45
	ENSMUSG00000049517.9	Rps23	0.555793	8.07338	17.149	0.000230468	0.0367822	2141.12	2423.56	522.39	1323.9	1354.63	1778.96	2180.98	2156.62	3114	1570.89	2018.31
	ENSMUSG00000049562.7	Ap5b1	-0.579935	4.54946	18.5213	8.43536e-05	0.0233943	182	202	121	175	194	183	114	173	115	137	85
	ENSMUSG00000049593.9	Lce1h	2.23754	4.75899	20.9293	0.000163991	0.0336394	7	5	3	0	3	4	26	32	22	8	2
	ENSMUSG00000049658.14	Bdp1	0.481388	6.51289	19.8942	5.0653e-05	0.017882	640	622	193	478	462	655	608	780	867	544	643
	ENSMUSG00000049709.5	Nlrp10	0.681722	5.8225	16.2237	0.00021979	0.0362369	40	31	12	31	35	67	50	107	40	61	34
	ENSMUSG00000049871.15	Nlrc3	-0.586898	3.95568	18.2935	9.19111e-05	0.0240705	143	137	44	102	130	180	98	87	74	90	51
	ENSMUSG00000050106.19	Tmc8	-1.09632	1.8535	20.6273	3.87635e-05	0.0156258	30	44	19	32	39	28	15	26	9	20	8
	ENSMUSG00000050234.8	Gja4	-0.697719	3.07831	15.7432	0.00024614	0.0367822	71	85	36	93	68	83	44	60	32	60	33
	ENSMUSG00000050592.9	Fam78a	-0.753174	3.53419	24.5544	9.75326e-06	0.00755858	124.28	133.33	40	109	113.17	119.13	69.73	97.37	53.34	54.46	43.51
	ENSMUSG00000050708.17	Ftl1	-0.626837	9.56204	20.3364	8.04468e-05	0.0226736	7278.8	7614.34	2743.97	6498.66	6600.31	7472.38	4605.99	6526.55	2790.1	4941.11	2380.16
	ENSMUSG00000050919.11	Zfp366	-0.596758	4.0568	15.7378	0.000246659	0.0367822	147	167	45	149	130	185	92	109	94	110	45
	ENSMUSG00000051506.18	Wdfy4	-0.451849	6.24117	14.5159	0.00040221	0.0494447	651	716	273	670	721	716	458	735	382	463	317
	ENSMUSG00000052160.8	Pld4	-0.518077	6.7725	17.0382	0.000184169	0.0343291	921	1101	425	1029	960	1044	686	971	524	574	521
	ENSMUSG00000053044.9	Cd8b1	-1.19437	1.78197	18.2219	9.44295e-05	0.0240705	24	36	18	30	18	54	11	19	12	13	11
	ENSMUSG00000053110.14	Yap1	0.522824	7.38264	29.6618	1.82604e-06	0.00422022	982	946	348	687	661	919	1049	1178	1262	921	946
	ENSMUSG00000053332.14	Gas5	0.461248	6.31778	15.4364	0.000277989	0.0394961	476	503	178	396	371	428	492	594	695	428	469
	ENSMUSG00000053897.16	Slc39a8	0.839032	3.20918	26.4592	5.14502e-06	0.00648946	40	45	12	35	31	40	56	75	67	66	38
	ENSMUSG00000054766.14	Set	0.562857	7.60051	17.6864	0.000191831	0.0343707	1336.47	1367.94	517.13	1012.61	1011.67	1281.66	1511.11	1347.17	2064.41	1160.88	1706.54
	ENSMUSG00000054889.11	Dsp	0.417639	11.722	19.0341	6.96222e-05	0.0209878	14448.8	14043	4725.81	10248	10773.4	14477	15077	19416.3	16007.8	13373.4	11808
	ENSMUSG00000056078.7	Lipm	0.703625	5.72748	25.5986	6.85332e-06	0.00719952	81.05	56.71	23.88	64.26	54.94	96.31	87.39	145.26	105.91	82.23	87.9
	ENSMUSG00000056153.16	Socs6	0.524118	6.07434	20.4083	4.1975e-05	0.0163785	468	461	102	322	332	477	451	526	620	399	460
	ENSMUSG00000056413.17	Adap1	-0.550346	4.33084	15.7321	0.000247216	0.0367822	183	188	94	185	150	196	107	159	111	124	84
	ENSMUSG00000057609.7	Lce1a1	1.68798	6.12839	29.5243	2.24281e-05	0.0116047	12	14	10	9	17	24	64	95	35	17	28
	ENSMUSG00000058558.13	Rpl5	0.501878	8.06846	19.9224	5.01315e-05	0.017882	1487.05	1617.33	526.6	1267	1284.2	1593.02	1628.31	1914.63	1855.15	1340.39	2115.49
	ENSMUSG00000058655.10	Eif4b	0.445886	8.34776	14.8366	0.000353375	0.0457107	2366	2428	917	1703	1766	2149	2446	2437	3084	1862	2732
	ENSMUSG00000059970.8	Hspa2	0.588776	5.47205	16.3528	0.000260359	0.0376078	150	207	76	173	140	173	227	304	292	154	191
	ENSMUSG00000060019.7	Gm10073	0.786616	4.62636	28.8426	2.36939e-06	0.00460793	150.25	99.32	46.07	78.25	93.09	138.3	162.17	195.1	169	121	198
	ENSMUSG00000060419.9	Rps16-ps2	1.13287	6.41627	18.827	0.000344267	0.0450366	477.56	548.88	166.33	301.13	293.18	399.87	812.09	496.25	1186.04	319.2	947.62
	ENSMUSG00000061167.10	Rpl15-ps3	0.635439	5.98828	16.8993	0.000319015	0.0432004	414.59	413.38	98.61	302.61	306.96	406.2	485.58	472.48	735.19	307.18	399.82
	ENSMUSG00000061780.7	Cfd	-0.519027	6.08572	16.2359	0.000220996	0.0362369	352	379	153	398	359	398	221	391	203	259	155
	ENSMUSG00000061838.8	Suclg2	0.464262	4.95935	14.9793	0.000333686	0.0441522	245.94	191.65	55.19	139.82	150.39	229.34	216.63	240.4	247.28	194.39	214.1
	ENSMUSG00000061928.7	Dsg1b	0.502968	8.28546	21.728	2.61001e-05	0.0123947	746.72	672.31	199.15	470.21	560.19	803.72	761.4	1190.57	866.21	653.35	552
	ENSMUSG00000063130.5	Calml3	0.668443	7.32408	34.4481	4.22064e-07	0.00221245	402	382	184	304	350	435	512	681	598	412	537
	ENSMUSG00000064201.9	Krt2	0.799182	11.9695	28.2511	1.04029e-05	0.00755858	7211	8082	3793	4779	6405	8551	12805	14032	14074	6390	9940
	ENSMUSG00000064254.7	Ethe1	-0.94794	2.65139	17.7385	0.000113447	0.0271232	43	37	23	44	53	39	22	29	17	29	10
	ENSMUSG00000066037.15	Hnrnpr	0.435832	6.89352	22.6551	1.88061e-05	0.0106877	794.84	661.96	227.09	525.96	541.45	819.74	732.94	953.84	869.26	686.66	676.76
	ENSMUSG00000066279.4	Chrna10	1.15259	1.92896	16.5294	0.00018078	0.0343291	14.81	13.46	6.66	17.48	14.16	8.43	37.93	38.9	31.88	19.05	15.48
	ENSMUSG00000067653.13	Ankrd23	0.780125	6.50118	25.6354	2.84559e-05	0.0131531	702	466	201	322	392	734	835	988	582	693	796
	ENSMUSG00000067818.7	Myl9	-0.627937	3.79787	15.6385	0.000256552	0.0374958	164	98	54	94	106	97	69	101	55	70	44
	ENSMUSG00000067873.12	Htatsf1	0.465203	5.2277	15.1176	0.000315695	0.0429184	280	278	91	192	217	299	271	302	345	258	327
	ENSMUSG00000068876.17	Cgn	0.904474	4.94362	21.4921	3.65947e-05	0.015333	24.15	34	14	24.68	24	33	51.77	86	48.59	21	37.91
	ENSMUSG00000068888.4	Lce1i	2.01675	5.26301	43.6821	2.57062e-07	0.00179044	9	6	4	2	10	7	34	42	21	15	19
	ENSMUSG00000068890.9	Lce1a2	1.60448	5.42681	17.8135	0.000408642	0.0494535	7	7	6	11	12	15	43	58	27	10	14
	ENSMUSG00000069372.4	Ctxn3	0.760321	3.29763	16.5507	0.000179289	0.0343291	67	44	16	38	27	76	63	114	71	66	59
	ENSMUSG00000069441.4	Dsg1a	0.498325	9.88389	17.6431	0.000117653	0.0272271	2018.89	1814.61	521.85	1275.31	1643.6	2733.13	2127.6	3416.27	2576.74	1821.52	1538
	ENSMUSG00000071415.7	Rpl23	0.507105	8.03317	20.6848	3.79653e-05	0.015484	1730.92	1697.76	696.45	1279	1272.34	1664.13	1926.5	1958.92	2336.44	1390.88	2087.05
	ENSMUSG00000072676.13	Tmem254a	0.920291	5.51245	66.5943	1.45118e-10	5.0308e-06	135	101	39	77	90	110	173	255	166	174	109
	ENSMUSG00000073412.7	Lst1	-0.824832	3.21644	18.2703	9.27203e-05	0.0240705	89	83	49	90	100	97	42	70	41	52	42
	ENSMUSG00000073639.7	Rab18	0.43185	6.42945	17.132	0.000143134	0.0310126	538	478	155	366	368	663	461	639	674.3	487	514
	ENSMUSG00000074794.11	Arrdc3	0.434739	6.8927	14.4721	0.000409414	0.0494535	729	510	148	448	495	799	563	1042	708	702	433
	ENSMUSG00000076928.6	Trac	-1.07625	2.90632	18.0417	0.00016942	0.0341469	80	65	24	47	73	90	39	43	24	35	9
	ENSMUSG00000078622.9	Ccdc47	0.49061	5.91682	16.6075	0.000175367	0.0342968	406.27	413.2	130	277.53	275	440	377.84	462	593	310	446
	ENSMUSG00000078656.12	Vps25	-0.45891	4.83334	15.8914	0.000232145	0.0367822	224	231.69	78	159	169	220.21	139.6	185.05	93	143	97
	ENSMUSG00000078671.12	Chd2	0.413062	7.19622	16.5411	0.000179956	0.0343291	1055.47	1070.52	317.96	689.38	740.5	1138.51	1039.07	1088.96	1222.35	936.12	1031.52
	ENSMUSG00000078722.3	Gm12394	0.960607	2.66075	21.8502	2.4989e-05	0.0122013	46.27	38.46	14	39.7	22.78	35.11	78.89	67.08	56.32	63.48	49.79
	ENSMUSG00000078783.2	Gm9733	-1.38841	1.31512	17.062	0.000147047	0.0316627	24	19	3	23	15	24	6	13	5	9	1
	ENSMUSG00000079020.10	Slc45a4	-0.554576	5.29823	27.2826	3.92403e-06	0.00591404	332	319	155	282	292	339	186	284	151	203	176
	ENSMUSG00000080002.3	Gm5566	1.41608	1.15431	17.5996	0.000119622	0.0274631	10.29	19	4.05	7.46	5.59	10.49	36.42	12.2	23.78	10.23	37.31
	ENSMUSG00000080316.12	Spaca6	0.744876	5.41992	33.1729	6.39923e-07	0.00246491	314	252	82	176	186	273	345	393	434	228	330
	ENSMUSG00000081289.2	Gm14857	1.38569	0.696713	15.6179	0.000258653	0.0375176	6	6	2	2	5	16	17	12	15	12	21
	ENSMUSG00000081603.2	Gm14681	0.718874	4.25667	20.9256	3.62411e-05	0.015333	125.48	113.04	22.93	90.43	70.59	139.19	146.44	146.34	181.75	95.66	156.15
	ENSMUSG00000086583.4	Gm15500	0.630778	8.00426	18.528	0.000189052	0.0343707	1936.08	1668.97	337.73	1068.57	1218.24	1835.43	1759.08	1996.27	2651.51	1411.58	1817.6
	ENSMUSG00000086688.5	Gm11560	0.947228	2.27073	17.9261	0.000105631	0.0257479	41.37	37.94	9.86	18.82	23.81	31.47	55.4	37.85	67.85	38.48	51.13
	ENSMUSG00000087165.8	2010001A14Rik	1.72088	0.396502	15.2719	0.000296808	0.0409937	5	7	2	2	2	4	13	8	15	4	19
	ENSMUSG00000087692.2	Gm11940	1.5703	2.23003	17.861	0.00012519	0.0282534	8	7	1	3	1	10	22	16	26	5	5
	ENSMUSG00000089809.10	Rasgef1b	-0.529604	5.18522	18.5873	8.2287e-05	0.0230052	293	345	93	334	264	338	167	265	171	191	162
	ENSMUSG00000090761.2	Gm17201	-5.00647	-0.356161	25.1744	9.52445e-06	0.00755858	4.66	1.58	1.88	5.82	5.43	2.66	0	0	0	0	0
	ENSMUSG00000091905.4	Dnajb6-ps	1.1963	2.87613	17.5132	0.000322246	0.0434681	30.94	64.77	20.08	36.29	33.39	40.03	74.96	47.61	124.88	42.62	122.44
	ENSMUSG00000092274.4	Neat1	0.511031	11.8831	24.4641	1.00581e-05	0.00755858	23914.6	21844.5	8774.03	19177	18773	24407	23629.7	32079.1	29865	25517.2	26221
	ENSMUSG00000093930.3	Hmgcs1	0.39677	7.41858	15.8549	0.00023551	0.0367822	962.43	853.13	316.85	673.63	740.8	1034.98	834.06	1114.66	1169.15	906.42	887.85
	ENSMUSG00000094686.2	Ccl21a	-0.745431	5.91002	17.4454	0.000362131	0.0464963	480.82	590.83	390.39	647.97	515.26	574.09	402.28	422.93	233.54	362.79	281.11
	ENSMUSG00000094724.9	Rnaset2b	-0.469069	5.29179	15.8303	0.000237811	0.0367822	283.29	313.97	154.84	280.45	294.87	316.72	187.64	285.32	172.65	204.16	173.5
	ENSMUSG00000095304.10	Plac9a	1.24252	5.24555	26.348	5.13703e-05	0.017882	112	118	109	83	113	89	357	239	233	255	223
	ENSMUSG00000095562.9	Erdr1	4.06301	5.38332	37.7547	6.30162e-06	0.00682682	19.67	2	41.19	0	10.49	39.51	263	124.41	436.12	233.22	489.91
	ENSMUSG00000096991.2	Gm26789	0.944601	3.4889	22.0571	3.19065e-05	0.0143649	52	52	17	60	40	51	83	68	126	56	91
	ENSMUSG00000097006.8	9530082P21Rik	0.55164	4.945	16.5051	0.000182503	0.0343291	242.3	219.57	56.23	156.23	127.75	217.77	251.14	264.07	284.25	167.83	226.12
	ENSMUSG00000097195.11	Snhg5	0.774689	4.69199	20.8038	7.43833e-05	0.0218529	148.82	167.81	64	118	117	147	217	193.84	284.92	145	224
	ENSMUSG00000100213.2	Gm28151	1.3187	1.30686	15.716	0.000248804	0.0368602	9	10	1	5	5	12	22	13	22	9	18
	ENSMUSG00000101309.2	Gm29397	1.13794	1.77387	20.0377	4.80558e-05	0.0177229	11.29	9.77	3.96	11.8	8.38	10.9	20.88	25.55	24.98	20.17	12.45
	ENSMUSG00000102439.5	Flg	2.14124	10.1845	47.4944	1.33775e-06	0.00356737	208	188	58	89	145	244	804	1700	563	270	255
	ENSMUSG00000102496.2	Gm36989	1.17349	2.82426	28.6434	2.52547e-06	0.00460793	24	32	3	22	17	40	42	54	75	39	40
	ENSMUSG00000102573.2	Gm7265	0.725249	4.07303	26.9666	4.35231e-06	0.00591404	106.08	75.94	28.65	69.57	51.72	112.85	111.67	167.84	136.94	98.77	90.33
	ENSMUSG00000104030.2	5330406M23Rik	0.540355	4.56328	19.176	6.60415e-05	0.020083	175	202	65	125	127	190	191	239	248	173	199
	ENSMUSG00000104060.2	Gm37954	-0.772442	2.98786	14.8765	0.000347742	0.0453202	67	69	17	46	51	76	22	49	27	43	17
	ENSMUSG00000104877.2	Gm42651	0.930465	2.08468	16.0977	0.00021404	0.036023	18	24	4	17	12	28	31	30	44	24	29
	ENSMUSG00000104960.2	Snhg8	0.659006	4.03598	19.6823	5.47587e-05	0.0179087	119	97	46.14	79	73	107	141	112	177	109	132
	ENSMUSG00000105717.2	Gm43465	1.17851	1.67713	15.7513	0.000245354	0.0367822	14	12	6	6	15	10	24	20	38	14	22
	ENSMUSG00000106110.2	Gm43571	0.814254	3.26651	19.2242	6.48695e-05	0.0200789	65	50	25	33	38	58.91	77	107.75	96	48.61	67
	ENSMUSG00000106815.2	Gm43658	0.771847	3.163	15.7947	0.000241176	0.0367822	31	41	14	28	13	42	45	55	58	40	40
	ENSMUSG00000107362.2	Gm40309	0.598771	3.78468	16.1408	0.000210451	0.0359395	85	78	26	65	50	90	72	103	130	96	85
	ENSMUSG00000108752.2	Gm45191	-0.781782	3.16928	22.1729	2.22881e-05	0.0116047	78	88	29	66	100	96	32	65	36	50	39
	ENSMUSG00000108784.2	4930517G19Rik	0.740802	4.23401	23.6973	1.30853e-05	0.00840051	111	125	60	107	98	119	186	189	232	110	154
	ENSMUSG00000109225.2	4930513N20Rik	0.889527	2.91859	24.7763	9.04437e-06	0.00755858	32	40	9	23	28	43	46	68	65	46	41
	ENSMUSG00000109904.2	Gm45819	0.893481	3.09672	25.2267	7.76601e-06	0.00742892	47	65	23	43	37	46	78	80	83	69	89
	ENSMUSG00000110556.2	Gm45762	0.791416	2.57795	20.3745	4.24943e-05	0.0163785	34	26	12	27	24	32	45	66	45	43	28
	ENSMUSG00000112734.2	Gm47644	1.03021	2.19609	19.8463	5.15519e-05	0.017882	27.06	21.15	7.83	18.7	14.22	25.68	28.64	62.96	48.19	27.41	29.45
	ENSMUSG00000113440.2	Gm46404	1.46389	1.00844	18.8069	7.57856e-05	0.0219088	4	8	3	4	5	7	12	19	18	7	16
	ENSMUSG00000114102.2	Gm48048	1.70494	2.29914	19.8184	0.000204293	0.0354111	25.03	22.83	5.82	10.48	23.17	17.63	53.16	28.93	92.3	15.97	78.25
	ENSMUSG00000114487.2	Gm49393	3.89141	-1.10187	15.3643	0.000286079	0.040315	0	0	0.61	0.03	0	0	0.42	5.26	1.95	1.35	7.23
	ENSMUSG00000115025.2	Gm4240	2.43019	-0.38339	14.488	0.000406788	0.0494535	1	3	0	0	1	0	6	6	4	7	2
	ENSMUSG00000117084.2	Gm22146	1.35536	1.69415	22.0043	2.36593e-05	0.0118869	14	15	4	9	16	15	30	78	26	17	13
	ENSMUSG00000117869.2	Snhg4	0.618942	4.46828	19.9671	4.93156e-05	0.017882	128.44	98.78	37.01	109.11	102.35	103.18	152.26	162.17	162.88	125.5	129.47
	ENSMUSG00000118171.2	Gm50390	0.772542	2.84429	15.7818	0.000242409	0.0367822	69.1	65.5	10.52	33.25	29.72	53.18	69.5	76.05	105.08	51.99	53.38
	ENSMUSG00000118671.1	Eppk1	0.657817	8.89931	36.1236	2.58233e-07	0.00179044	1402	1439.99	548	1125	1054	1408	1924	2635	1885.99	1393	1451

## Sheet: c IPA USRs for 291 DEGs
IPA USR analysis of DEGs from b (n=291) (direct and indirect interactions)	Upstream Regulator	Expr Log Ratio	Molecule Type	Predicted Activation State	Activation z-score	Flags	p-value of overlap	Target Molecules in Dataset	Mechanistic Network
	PRKAG3		kinase				1.38e-05	DLAT,EIF4B,FTL,GAS5,KLF4,MID1IP1,RPL5,Snhg5,Snhg8,TRIM16
	OVOL1		transcription regulator				6.72e-05	CBFA2T3,IRF6,RCAN1
	TAF1C		transcription regulator				6.72e-05	CBFA2T3,IRF6,RCAN1
	GSK0660		chemical reagent				6.72e-05	FBXO32,PDK4,TRIM63	48 (7)
	SUZ12		enzyme				0.000119	ABL2,DNAJB6,EPCAM,FBXO32,Flg,IVNS1ABP,KLF4,SFR1
	MSX1		transcription regulator				0.000141	COL2A1,EPHA4,MYF6,RUNX2
	BMPR1B		kinase				0.000223	CFD,COL2A1,PTGS2,RUNX2
	PPP3CA		phosphatase				0.000265	CD5,FTL,NFATC1,PTGS2,RCAN1,RUNX2
	harmine		chemical - endogenous non-mammalian				0.00033	NFATC1,PTGS2,RUNX2
	PPP3CB		phosphatase				0.00033	FBXO32,GADD45A,TRIM63
	SGPP1		phosphatase				0.000416	Flg,Krt10,PTGS2
	SIN3A		transcription regulator				0.000556	Acp5,FBXO32,NCL,PTGS2,SET	40 (7)
	mevastatin		chemical drug				0.00063	ADAMTS1,KLF4,PTGS2
	ARRDC3	0.435	other				0.000689	ADRB2,PCK1
	PPP1R18		other				0.000689	Acp5,NFATC1
	Sapk		group				0.000689	FBXO32,GADD45A
	AMELX		growth factor				0.000689	COL2A1,RUNX2
	Foxo		group				0.000759	FBXO32,GADD45A,TRIM63
	Ctbp		group				0.000904	Acp5,ADRB2,GADD45A
	tomatidine		chemical - endogenous non-mammalian				0.00106	Acp5,NFATC1,TCIRG1
	GNA14		enzyme				0.0011	ADAMTS1,GADD45A,GJA4,HK2,PTGS2
	LOC102724788/PRODH		enzyme				0.00114	NFATC1,PTGS2	48 (7)
	PPP1R13L		transcription regulator				0.00124	DSP,PKP1,TP63
	NTN1		growth factor				0.00144	CTSB,PTGS2,YAP1
	EIF4G2		translation regulator				0.00165	CTSD,KLF4,PTGS2
	SSPN		other				0.0017	CTSB,PTGS2
	TRAT1		kinase				0.0017	CD3E,CD5
	Gm19378		other				0.0017	FBXO32,TRIM63
	ferric nitrilotriacetate		chemical toxicant				0.0017	KLF4,PTGS2
	gallium nitrate		chemical drug				0.0017	Acp5,NFATC1
	MGP		other				0.00188	ACTA2,CFD,RUNX2
	TINCR		other				0.00214	ALOXE3,CHAC1,FTL
	MLN120B		chemical drug				0.00214	CD3E,CTSB,PTGS2	19 (3)
	THZ2		chemical drug				0.00214	ETS2,FOSL2,RUNX2
	Alpha 1 antitrypsin		group				0.00236	COL2A1,CTSB
	ASPN		other				0.00236	COL2A1,PTGS2	48 (7)
	PDGFD		growth factor				0.00236	NFATC1,PTGS2	48 (7)
	miR-542-3p (miRNAs w/seed GUGACAG)		mature microRNA				0.00236	PTGS2,RPS23
	E4F1		transcription regulator				0.00236	DLAT,DLD
	PROK1		growth factor				0.00236	PTGS2,RCAN1
	NKX3-2		transcription regulator				0.00236	COL2A1,RUNX2
	SIX4		transcription regulator				0.00236	DEPTOR,YAP1
	RWJ 67657		chemical drug				0.00236	ACTA2,PTGS2	42 (7)
	Ki16425		chemical reagent				0.00236	NFATC1,PTGS2
	S-allyl-L-cysteine		chemical - endogenous non-mammalian				0.00236	ACTA2,PTGS2	65 (11)
	SOX6		transcription regulator				0.00241	COL2A1,MYL9,RUNX2
	BCOR		transcription regulator				0.00258	ADAMTS1,CIITA,COL2A1,NFATC1
	MYOC		other				0.00268	ADAMTS1,FBXO32,MAFK,RUNX2,TRIM63
	miR-103-3p (and other miRNAs w/seed GCAGCAU)		mature microRNA				0.0027	ACTA2,KLF4,SERBP1
	BAG1		other				0.0027	GADD45A,PTGS2,UAP1	9 (2)
	DMD		other				0.00273	CHRNA10,DGKZ,DNAJB6,FBXO32,IP6K3,MAP7,PDK4,SGCB
	NPC1		transporter				0.00282	CTSB,CTSD,HMGCS1,KLF4,PTGS2
	CDK9		kinase				0.00295	HLA-DQA1,NCL,PDK4,SRSF6
	CREB3L3		transcription regulator				0.00302	NFATC1,PCK1,RUNX2	48 (7)
	PDCD10		other				0.00312	ACTA2,KLF4
	ZNF746		transcription regulator				0.00312	PCK1,PDHA1
	VCL		enzyme				0.00312	COL2A1,RUNX2	48 (7)
	IPMK		kinase				0.00335	ACTA2,MYL9,PER1	39 (7)
	miR-203a-3p (and other miRNAs w/seed UGAAAUG)		mature microRNA				0.00335	KLF4,RUNX2,TP63
	CCR1		G-protein coupled receptor				0.00335	Acp5,NFATC1,RUNX2	56 (7)
	CD47		transmembrane receptor				0.00335	Acp5,FTL,NFATC1
	desmopressin		biologic drug				0.00357	CARD14,CTSD,EIF4B,RPL23,VWF
	IRF6	0.449	transcription regulator				0.00358	CBFA2T3,KLF4,PTGS2,RCAN1
	DYSF		other				0.0039	CFD,ERRFI1,FTL,HLA-DQA1,Ifi202b
	PKP2		other				0.00399	COL2A1,DSP
	WNT5B		other				0.00399	ACTA2,COL2A1	42 (7)
	NEK6		kinase				0.00399	PTGS2,RILPL1
	RNA polymerase II		complex				0.004	Acp5,CD3E,CIITA,FOSL2,GADD45A,HLA-DQA1,PCK1,PTGS2,RUNX2
	GC-GCR dimer		complex				0.00409	ADRB2,PCK1,PDK4
	NFATC4		transcription regulator				0.00409	Acp5,CTSD,NFATC1	49 (7)
	CBFA2T3	-0.587	transcription regulator				0.00409	CBFA2T3,IRF6,RCAN1
	NFIA		transcription regulator				0.00449	MYF6,PCK1,RUNX2
	mir-23		microRNA				0.00449	FBXO32,RUNX2,TRIM63
	glycyrrhizic acid		chemical drug				0.00449	ADRB2,PTGS2,VWF
	GNAQ		enzyme				0.00454	ADAMTS1,GADD45A,GJA4,HK2,PTGS2,YAP1	37 (5)
	MYOG		transcription regulator				0.00491	FBXO32,MYF6,TRIM63
	pitavastatin		chemical drug				0.00491	HMGCS1,NFATC1,PTGS2
	BCO2		enzyme				0.00495	ARRDC3,DLAT
	KCNN4		ion channel				0.00495	Acp5,NFATC1
	ALOX15B		enzyme				0.00495	KLF4,TP63
	mito-TEMPO		chemical reagent				0.00495	ACTA2,PTGS2	48 (7)
	gamma-secretase inhibitor XX		chemical reagent				0.00495	FBXO32,TRIM63
	ATP5IF1		other				0.0051	ACADS,DLD,PCK1,TXNRD1
	Fgf		group				0.00536	PER1,PTGS2,RUNX2	49 (7)
	RCAN1	0.473	other				0.00536	CBFA2T3,PTGS2,RCAN1
	UPF2		other				0.00536	DSP,PTGS2,RCAN1
	CL 316243		chemical drug				0.00536	CKB,PDK4,PTGS2
	CD3E	-0.842	transmembrane receptor				0.00569	CD3E,CD8B,NFATC1,PTGS2	68 (10)
	GW501516		chemical drug				0.0057	CCL21,CFD,Ifi202b,PDK4,PTGS2	71 (12)
	EPHB1		kinase				0.00601	PCK1,PTGS2	53 (5)
	OSTM1		other				0.00601	Acp5,NFATC1
	WNT10B		other				0.00601	ACADS,RUNX2
	enoxacin		chemical drug				0.00601	Acp5,TCIRG1
	rosmarinic acid		chemical - endogenous non-mammalian				0.00601	ACTA2,PTGS2
	acyline		biologic drug				0.00617	RPL23,RPL5,RPS18,RPS23,RPS8
	CHRNA7		transmembrane receptor				0.00633	CHRNA10,Flg,Krt10
	RYR1		ion channel				0.00633	DLAT,DLD,PDHA1
	TRIB3		kinase				0.00685	FBXO32,HK2,RUNX2	48 (7)
	HSPG2		enzyme				0.00685	ACTA2,COL2A1,GADD45A
	ATP6AP2		transporter				0.00716	ACTA2,PTGS2
	CST3		other				0.00716	Acp5,NFATC1
	mimosine		chemical drug				0.00716	CIITA,HLA-DQA1
	CREM		transcription regulator				0.00733	ADRB2,CD8B,ERRFI1,HMGCS1,NFATC1,PER1
	SIRT6		enzyme				0.00736	ACTA2,PCK1,PTGS2,RPL23	80 (18)
	TBP		transcription regulator				0.00736	BDP1,CD3E,ETS2,PTGS2
	ELF3		transcription regulator				0.0074	COL2A1,EHF,PTGS2	42 (7)
	ZBTB7B		transcription regulator				0.00811	CD8B,COL2A1,HMGCS1,KLF4
	echinomycin		chemical drug				0.0084	ADAMTS1,HK2
	BCO1		enzyme				0.0084	ARRDC3,DLAT
	SOX5		transcription regulator				0.0084	COL2A1,RUNX2	48 (7)
	CRY2		enzyme				0.0084	PCK1,PER1
	BCR		kinase				0.0084	DSG1,NFATC1
	GHSR		G-protein coupled receptor				0.0084	Acp5,TCIRG1
	LAMA2		other				0.0084	ACTA2,PLVAP
	CRY1		enzyme				0.0084	PCK1,PER1	48 (5)
	ferric ammonium citrate		chemical drug				0.0084	FTL,GADD45A
	N,N-dimethylsphingosine		chemical reagent				0.0084	NFATC1,PTGS2	87 (12)
	etanercept		biologic drug				0.00857	NFATC1,PTGS2,SLC10A1	66 (11)
	CARM1		transcription regulator				0.00857	FTL,GADD45A,PCK1	39 (6)
	APC		enzyme				0.00951	EPCAM,HK2,KLF4,PDK4,PTGS2,SUCLG2	49 (7)
	NFYB		transcription regulator				0.00958	ACTA2,DNAJB6,GADD45A,PCK1,RUNX2,SERBP1,SLC39A8,VWF
	TGFBR		group				0.00973	ACTA2,ADAMTS1
	mir-375		microRNA				0.00973	ACTA2,YAP1
	RMRP		other				0.00973	COL2A1,RUNX2
	LAMC1		other				0.00973	ACTA2,ETS2
	WNT3		other				0.00973	PTGS2,RUNX2	25 (4)
	5,8,11,14-eicosatetraynoic acid		chemical reagent				0.00973	CFD,PCK1	50 (7)
	onapristone		chemical drug				0.00973	ADAMTS1,CTSD
	conjugated linoleic acid		chemical drug				0.00984	Acp5,NFATC1,PTGS2
	ABL1		kinase				0.00984	CTSB,GADD45A,TP63	56 (7)
	PCGEM1		other				0.0105	HK2,PDHA1,PDK4
	IL17F		cytokine				0.0105	COL2A1,PTGS2,RUNX2
	NU9056		chemical reagent				0.0108	TP63
	thromboxane A2		chemical - endogenous mammalian				0.0108	PTGS2
	TRIM72		enzyme				0.0108	ACTA2
	FD & C Yellow no. 6		chemical toxicant				0.0108	CD3E
	GÎ±q		group				0.0108	PTGS2
	beta-glucuronidase		group				0.0108	PTGS2
	3',5'-methoxyflavone		chemical reagent				0.0108	PTGS2
	tandospirone		chemical drug				0.0108	PER1
	MAP2K4/7		group				0.0108	PTGS2
	ZM 323881		chemical drug				0.0108	RCAN1
	UBAP1		other				0.0108	DEPTOR
	ASB9		transcription regulator				0.0108	CKB
	Pad2		other				0.0108	PTGS2
	CDC42BPB		kinase				0.0108	CTSB
	RDH5		enzyme				0.0108	RDH10
	TMEM178A		other				0.0108	NFATC1
	PPIP5K1		phosphatase				0.0108	RUNX2
	GGN		other				0.0108	ADRB2
	FNDC3B		other				0.0108	RUNX2
	procyanidin B2		chemical - endogenous non-mammalian				0.0108	PTGS2
	RBM24		other				0.0108	TP63
	GGT7		enzyme				0.0108	ADRB2
	CHMP4C		other				0.0108	DEPTOR
	ASB13		other				0.0108	YAP1
	nickel sulfide		chemical reagent				0.0108	PTGS2
	Tpl2 kinase inhibitor		chemical drug				0.0108	PTGS2
	roxadustat		chemical drug				0.0108	SERPINF1
	cucurbitacin E		chemical - endogenous non-mammalian				0.0108	PTGS2
	GTF2H2		transcription regulator				0.0108	KLF9
	MYLPF		other				0.0108	ACTA2
	EDN2		growth factor				0.0108	PTGS2
	CLN3		other				0.0108	HOOK1
	GFUS		enzyme				0.0108	ACTA2
	mir-675		microRNA				0.0108	COL2A1
	mir-1285		microRNA				0.0108	YAP1
	miR-574-3p (miRNAs w/seed ACGCUCA)		mature microRNA				0.0108	TP63
	miR-663b (miRNAs w/seed GUGGCCC)		mature microRNA				0.0108	Snhg8
	TIMELESS		other				0.0108	PER1
	EXOC5		other				0.0108	ACTA2
	CHRNA5		transmembrane receptor				0.0108	TP63
	SIGLEC7		transmembrane receptor				0.0108	PTGS2
	SIGLEC9		other				0.0108	PTGS2
	DCSTAMP		other				0.0108	Acp5
	PFKFB2		kinase				0.0108	PDK4
	ITIH5		other				0.0108	ACTA2
	5-methoxytryptophan		chemical - endogenous mammalian				0.0108	PTGS2
	isonicotinamide		chemical reagent				0.0108	PCK1
	LUC7L3		other				0.0108	PTGS2
	LRRC17		other				0.0108	NFATC1
	TFF1		other				0.0108	PTGS2
	NPIPA5 (includes others)		other				0.0108	ADRB2
	Pla2g2a		other				0.0108	PTGS2
	THEM4		enzyme				0.0108	PTGS2
	RXFP1		G-protein coupled receptor				0.0108	ACTA2
	LIN7B		other				0.0108	LIN7C
	PRC1		other				0.0108	PTGS2
	FZD4		G-protein coupled receptor				0.0108	PLVAP
	LIN7A		other				0.0108	LIN7C
	NCGC00184710		chemical reagent				0.0108	PDK4
	arsenic trichloride		chemical reagent				0.0108	GADD45A
	2,4-dinitrophenylhydrazine		chemical toxicant				0.0108	PLA2G2F
	S-methylisothiopseudouronium		chemical reagent				0.0108	PTGS2
	LY311727		chemical reagent				0.0108	PTGS2
	BN 50730		chemical reagent				0.0108	PTGS2
	Triton X-100		chemical reagent				0.0108	PPP1CB
	1-(1-glycero)dodeca-1,3,5,7,9-pentaene		chemical toxicant				0.0108	PTGS2
	triazolam		chemical drug				0.0108	PER1
	Ro 31-7549		chemical drug				0.0108	PTGS2
	theaflavin monogallate B		chemical - endogenous non-mammalian				0.0108	PTGS2
	anti-miR-32 inhibitor		chemical reagent				0.0108	KLF4
	N-t-Boc-Phe-D-Leu-Phe-D-Leu-Phe		chemical reagent				0.0108	PTGS2
	n-6 docosapentaenoic acid		chemical - other				0.0108	PTGS2
	long-chain alcohol		chemical - endogenous non-mammalian				0.0108	PTGS2
	fucose		chemical - endogenous mammalian				0.0108	ACTA2
	G protein q		complex				0.0108	RCAN1
	HBP1		transcription regulator				0.0111	CTSB,PTGS2
	DIRAS3		enzyme				0.0111	COL2A1,HLA-DQA1
	MYH9		enzyme				0.0111	Flg,Lce1a1
	finerenone		chemical drug				0.0111	IP6K3,PER1
	perindopril		chemical drug				0.0111	ACTA2,TRIM63
	JAK		group				0.0112	FBXO32,PTGS2,TRIM63
	MHC II		group				0.0112	HLA-DQA1,RNASET2,RPL23
	MALAT1		other				0.0112	CFD,LIPM,Neat1
	EED		transcription regulator				0.0112	KLF4,PTGS2,RUNX2
	DMP1		other				0.0119	CTSW,EPCAM,RUNX2
	methyl methanesulfonate		chemical toxicant				0.0119	CTSD,GADD45A,KLF4
	fluoride		chemical - endogenous mammalian				0.0126	GADD45A,RUNX2
	salubrinal		chemical reagent				0.0126	Acp5,NFATC1
	ORAI1		ion channel				0.0126	Acp5,NFATC1
	GPNMB		enzyme				0.0126	Acp5,NFATC1
	MS4A1		other				0.0126	CD22,HK2
	DMH1		chemical reagent				0.0126	ACTA2,PTGS2
	HBEGF		growth factor				0.0127	HK2,PDK4,PTGS2
	NME1		kinase				0.0127	CTSD,NOP58,PTGS2
	beta-carotene		chemical - endogenous mammalian				0.0127	ARRDC3,MID1IP1,PTGS2
	CYP1A2		enzyme				0.0135	CD3E,ETHE1,Mt4
	RAG1		enzyme				0.0135	CD5,COL2A1,RUNX2
	PAX1		transcription regulator				0.0135	COL2A1,Flg,IRF6
	mycophenolic acid		chemical drug				0.0136	ACTA2,ADRB2,PTGS2,RUNX2
	PIK3R1		kinase				0.0142	ACTA2,PCK1,PDHA1,PTGS2
	ALDH1A1		enzyme				0.0142	PCK1,RUNX2
	MIRLET7		group				0.0142	ACTA2,ACVR1B
	FANCD2		other				0.0142	TP63,TXNRD1
	NRP1		transmembrane receptor				0.0142	ACTA2,RCAN1
	PLA2G2A		enzyme				0.0142	PCK1,PTGS2
	S1PR3		G-protein coupled receptor				0.0142	ACTA2,PTGS2
	SMAD6		transcription regulator				0.0142	NFATC1,PCK1
	2-arachidonoylglycerol		chemical - endogenous mammalian				0.0142	PCK1,PTGS2
	SMAD1		transcription regulator				0.0143	ACTA2,COL2A1,RUNX2
	KDR		kinase				0.0143	PTGS2,SET,SOX18
	testosterone propionate		chemical drug				0.0143	CLTB,FBXO32,TRIM63
	Hsp27		group				0.0151	FBXO32,PTGS2,TRIM63
	PPRC1		transcription regulator				0.0151	ERRFI1,HK2,PTGS2
	HCAR2		G-protein coupled receptor				0.0159	PTGS2,SLC37A2
	GSN		other				0.0159	ACTA2,COL2A1
	PDGFRA		kinase				0.0159	ACTA2,RUNX2
	NFASC		other				0.0159	DYNC1LI2,DYNLT3
	SH3BP2		other				0.0159	Acp5,NFATC1
	NCR2		transmembrane receptor				0.0159	PTGS2,RCAN1
	CH-223191		chemical reagent				0.0159	ACTA2,PTGS2
	isoliquiritigenin		chemical - endogenous non-mammalian				0.0159	PTGS2,SERPINF1
	clenbuterol		chemical drug				0.0159	ADRB2,FBXO32
	TCL1A		transcription regulator				0.0159	Acp5,CD300LD,CTSB,CTSD
	SCARB1		transporter				0.016	FBXO32,PTGS2,TRIM63
	TFAP4		transcription regulator				0.016	CBFA2T3,IRF6,RCAN1
	semaxinib		chemical drug				0.0163	CCL21,CD3E,CD8B,PTGS2,VWF
	cytochalasin D		chemical toxicant				0.0169	ACTA2,COL2A1,PTGS2
	Gli		group				0.0176	ACTA2,RUNX2
	PROM1		other				0.0176	HMGCS1,PCK1
	mir-143		microRNA				0.0176	HK2,PTGS2
	S1PR2		G-protein coupled receptor				0.0176	ACTA2,PTGS2
	MNT		transcription regulator				0.0176	FBXO32,NCL
	PS-1145		chemical drug				0.0176	PTGS2,UACA
	ITGB2		transmembrane receptor				0.0178	ACTA2,PTGS2,RUNX2
	EFNA5		kinase				0.0178	DSG1,PKP1,PTGS2
	9,10-dimethyl-1,2-benzanthracene		chemical toxicant				0.0178	Flg,GADD45A,PTGS2
	mir-30		microRNA				0.0178	GADD45A,KLF9,RUNX2
	inosine		chemical - endogenous mammalian				0.0187	CFD,FTL,RNASET2
	LRP6		transmembrane receptor				0.0187	ACTA2,EPCAM,HK2
	LRP1		transmembrane receptor				0.0187	CTSD,PTGS2,SERPINF1
	MAX		transcription regulator				0.0191	FBXO32,GADD45A,HK2,NCL
	mir-29		microRNA				0.0191	ACTA2,KLF4,NASP,RUNX2
	tert-butyl hydroperoxide		chemical toxicant				0.0195	COL2A1,PTGS2
	PKNOX2		transcription regulator				0.0195	COL2A1,GADD45A
	SMARCD3		transcription regulator				0.0195	COL2A1,DEPTOR
	KCNJ10		ion channel				0.0195	GADD45A,Ifi202b
	HOXD3		transcription regulator				0.0195	DSG1,DSP
	BID		other				0.0195	CTSB,CTSD
	HNRNPAB		enzyme				0.0195	ACTA2,PTGS2
	biochanin A		chemical toxicant				0.0195	PTGS2,RUNX2
	deoxycholate		chemical - endogenous mammalian				0.0197	PTGS2,SLC10A1,TP63
	CCN5		growth factor				0.0197	ACTA2,DSP,KLF4
	LONP1		peptidase				0.0204	ACADS,CHAC1,DLD,PTGS2
	ROCK		group				0.0207	ACTA2,MAFK,RUNX2
	GRB2		other				0.0207	ACTA2,Flg,IRF6
	carbamazepine		chemical drug				0.0207	EIF4A2,KLF9,MID1IP1
	TCF/LEF		group				0.0214	PTGS2,RUNX2
	Collagen type IV		complex				0.0214	ACTA2,PTGS2
	GNA13		enzyme				0.0214	ACTA2,PTGS2
	SIN3B		transcription regulator				0.0214	FBXO32,NCL
	ERN1		kinase				0.0214	ACTA2,EPCAM,HOOK1,LAD1,LPCAT2
	UC2288		chemical reagent				0.0215	COL2A1
	arbutin		chemical drug				0.0215	PTGS2
	ginsenoside Rh2		chemical - endogenous non-mammalian				0.0215	NFATC1
	prostaglandin E3		chemical - endogenous mammalian				0.0215	PTGS2
	HP1		group				0.0215	PTGS2
	Steroid 5 alpha-Reductase		group				0.0215	PTGS2
	ARHGEF12		other				0.0215	ACTA2
	3-(methylthio)propionic acid		chemical - endogenous mammalian				0.0215	PCK1
	Rab5		group				0.0215	ADRB2
	dacetuzumab		biologic drug				0.0215	TP63
	sPla2		group				0.0215	PTGS2
	propionate derivative		chemical - other				0.0215	PCK1
	UBE2W		enzyme				0.0215	Krt10
	ADGRL2		G-protein coupled receptor				0.0215	ADRB2
	MCOLN1		ion channel				0.0215	CTSD
	NAA15		transcription regulator				0.0215	HYPK
	LPAR5		G-protein coupled receptor				0.0215	PTGS2
	VRK2		kinase				0.0215	PTGS2
	Snhg7		other				0.0215	ACTA2
	VPS33B		transporter				0.0215	VWF
	SELENOH		other				0.0215	GLB1
	DSC2		other				0.0215	DSP
	FRZB		other				0.0215	COL2A1
	Mi2		group				0.0215	Acp5
	MIP1		group				0.0215	NFATC1
	3,4-dihydroxyphenylethanol		chemical drug				0.0215	PTGS2
	AGRO 100		chemical drug				0.0215	NCL
	HLA-B27		complex				0.0215	HLA-DQA1
	CTS-1027		chemical drug				0.0215	ACTA2
	TAT		enzyme				0.0215	GLB1
	SETBP1		transcription regulator				0.0215	SET
	EIF3H		enzyme				0.0215	YAP1
	STXBP4		other				0.0215	TP63
	GAS5-AS1		other				0.0215	ACTA2
	PLA2G2F	0.713	enzyme				0.0215	PTGS2
	STAM		other				0.0215	DEPTOR
	miR-431-5p (and other miRNAs w/seed GUCUUGC)		mature microRNA				0.0215	EHF
	TPPP3		other				0.0215	ADRB2
	CDK10		kinase				0.0215	ETS2
	STK38L		kinase				0.0215	YAP1
	TGFBI		other				0.0215	CCL21
	OSTF1		transcription regulator				0.0215	RUNX2
	SNF8		enzyme				0.0215	VPS25
	B4GALNT2		enzyme				0.0215	VWF
	LIMD1		transcription regulator				0.0215	NFATC1
	TXNDC5		enzyme				0.0215	CTSB
	CBR1		enzyme				0.0215	PTGS2
	DNAJB1		transcription regulator				0.0215	RORA
	ARHGDIB		enzyme				0.0215	PTGS2
	ITPR3		ion channel				0.0215	PCK1
	Bhlhe41		transcription regulator				0.0215	PER1
	MARCKS		other				0.0215	ACTA2
	SH3GLB2		other				0.0215	PTGS2
	PEX14		transcription regulator				0.0215	PTGS2
	CARHSP1		transcription regulator				0.0215	PCK1
	MLS000389544		chemical reagent				0.0215	PDK4
	bavachalcone		chemical reagent				0.0215	RORA
	ristocetin		chemical toxicant				0.0215	VWF
	hydroxyl radical		chemical toxicant				0.0215	KLF4
	semapimod		chemical drug				0.0215	PTGS2
	SC68376		chemical drug				0.0215	PTGS2
	pyridoxal		chemical - endogenous mammalian				0.0215	PTGS2
	ethyl methanesulfonate		chemical toxicant				0.0215	CIITA
	bifenthrin		chemical toxicant				0.0215	PTGS2
	PD 173958		chemical drug				0.0215	Flg
	benzylamine		chemical - endogenous mammalian				0.0215	PTGS2
	CGP77675		chemical drug				0.0215	PTGS2
	methylprednisolone acetate		chemical drug				0.0215	PTGS2
	vanillic acid		chemical - endogenous mammalian				0.0215	PTGS2
	2-hydroxyarachidonic acid		chemical reagent				0.0215	PTGS2
	tetrahydropalmatine		chemical - endogenous non-mammalian				0.0215	PTGS2
	tyrphostin AG 1295		chemical drug				0.0215	ACTA2
	epoxyeicosatrienoic acid		chemical - other				0.0215	PTGS2
	lipooligosaccharide		chemical toxicant				0.0215	PTGS2
	MTORC1		complex				0.0217	HK2,KLF4,PTGS2
	KLF15		transcription regulator				0.0217	ACADS,PDK4,TRIM63
	iron		chemical - endogenous mammalian				0.0217	FTL,GADD45A,SLC39A8
	RHOA		enzyme				0.0219	ACTA2,CTSD,PDHA1,RUNX2
	BIRC5		other				0.0227	HLA-DQA1,TP63,VWF
	CBL		transcription regulator				0.0227	CD3E,EPHA4,RUNX2
	carbonyl cyanide m-chlorophenyl hydrazone		chemical toxicant				0.0227	ERRFI1,HK2,PTGS2
	lactosylceramide		chemical - endogenous mammalian				0.0233	CIITA,HLA-DQA1
	cis-urocanic acid		chemical drug				0.0233	ADAMTS1,PTGS2
	MTM1		phosphatase				0.0233	FBXO32,TRIM63
	ADRB3		G-protein coupled receptor				0.0233	ADRB2,PTGS2
	KIF3A		enzyme				0.0233	COL2A1,HMGCS1
	dimethyl fumarate		chemical drug				0.0233	ACTA2,PTGS2
	dichloroacetic acid		chemical drug				0.0233	PDHA1,PDK4
	L-methionine		chemical - endogenous mammalian				0.0238	ACTA2,ETS2,PCK1
	LTA		cytokine				0.0238	CCL21,COL2A1,PTGS2
	CYP1B1		enzyme				0.0238	CD3E,ETHE1,Mt4
	N-cor		group				0.0249	CTSB,NFATC1,PCK1,PTGS2
	MAP2K4		kinase				0.0249	ERRFI1,GADD45A,PTGS2
	PLAG1		transcription regulator				0.0249	CD300C,CLTB,NFATC1
	EBI3		cytokine				0.0249	CIITA,HLA-DQA1,NFATC1
	glucagon		biologic drug				0.0249	CARD14,EIF4B,PCK1
	Tnf (family)		group				0.025	FBXO32,LAD1,PTGS2,RUNX2,TRIM63
	Fibrin		complex				0.0254	ACTA2,COL2A1
	PLA2G6		enzyme				0.0254	PTGS2,RUNX2
	RAPGEF3		other				0.0254	NFATC1,PTGS2
	desipramine		chemical drug				0.0254	FGFBP1,PDE4B
	beta-glycerophosphoric acid		chemical - endogenous mammalian				0.0254	PTGS2,RUNX2
	NCOR2		transcription regulator				0.026	CTSB,NFATC1,PTGS2
	PRKCB		kinase				0.026	Acp5,PTGS2,TCIRG1
	Ccl2		cytokine				0.026	CFD,CTSB,KLF4
	IL11		cytokine				0.0272	ACTA2,COL2A1,VWF
	GPER1		G-protein coupled receptor				0.0272	ACTA2,ERRFI1,NOP58
	IDH1		enzyme				0.0272	CFD,PCK1,RUNX2
	BNIP3L		other				0.0272	CD22,GADD45A,HK2
	PAX5		transcription regulator				0.0272	CD22,CIITA,HK2
	phenylbutazone		chemical drug				0.0272	ADAMTS1,GAS5,PTGS2
	dexamethasone phosphate		chemical drug				0.0275	ERRFI1,PDK4
	ADCY		group				0.0275	NFATC1,PER1
	Ikb		group				0.0275	PTGS2,UACA
	HOXA13		transcription regulator				0.0275	EPHA4,PTGS2
	BMPER		other				0.0275	ACTA2,RUNX2
	USP19		peptidase				0.0275	FBXO32,TRIM63
	ammonium chloride		chemical drug				0.0275	CTSB,RCAN1
	diosgenin		chemical - endogenous non-mammalian				0.0275	HMGCS1,PTGS2
	HIC1		transcription regulator				0.0284	ACTA2,ADRB2,TRIM16
	dalfampridine		chemical drug				0.0284	HK2,KLF4,PTGS2
	GW 4064		chemical toxicant				0.0296	PCK1,PDK4,SLC10A1
	LRPAP1		other				0.0297	ACTA2,PTGS2
	ITGA1		other				0.0297	COL2A1,PTGS2
	HSD17B4		enzyme				0.0297	PDK4,PTGS2
	IREB2		translation regulator				0.0297	FTL,HK2
	piceatannol		chemical - endogenous non-mammalian				0.0297	NFATC1,PTGS2
	kaempferol		chemical toxicant				0.0297	PTGS2,RUNX2
	SP3		transcription regulator				0.0304	ACTA2,COL2A1,KLF4,PTGS2,SLC39A8,TXNRD1
	MST1		growth factor				0.0319	PCK1,PTGS2
	miR-23a-3p (and other miRNAs w/seed UCACAUU)		mature microRNA				0.0319	FBXO32,TRIM63
	LTBP1		other				0.0319	COL2A1,VWF
	CTSB	-0.5	peptidase				0.0319	ACTA2,CTSB
	NOS1		enzyme				0.0319	FBXO32,TRIM63
	HMGB2		transcription regulator				0.0319	COL2A1,RUNX2
	cuprizone		chemical toxicant				0.0319	HMGCS1,PTGS2
	sulprostone		chemical drug				0.0321	PTGS2
	Diap		group				0.0321	ACTA2
	chloride		chemical - endogenous mammalian				0.0321	PTGS2
	Esr1-Estrogen-Sp1		complex				0.0321	CTSD
	cardamomin		chemical - endogenous non-mammalian				0.0321	PTGS2
	cetylpyridinium		chemical drug				0.0321	NFATC1
	PF-573228		chemical drug				0.0321	TP63
	Gm10768		other				0.0321	PCK1
	hexa-D-arginine		biologic drug				0.0321	PTGS2
	des-Arg(10)-kallidin		chemical reagent				0.0321	PTGS2
	imperatorin		chemical - endogenous non-mammalian				0.0321	PTGS2
	ZNF219		transcription regulator				0.0321	COL2A1
	NIPBL		transcription regulator				0.0321	KLF4
	Snhg5	0.775	other				0.0321	KLF4
	OTUB2		enzyme				0.0321	YAP1
	NDUFAF3		other				0.0321	CTSD
	DNAJA2		enzyme				0.0321	RORA
	adrenoceptor		group				0.0321	PDE4B
	Ap1 gamma		group				0.0321	CD8B
	DUSP9		phosphatase				0.0321	PCK1
	volasertib		chemical drug				0.0321	GADD45A
	pycnogenols		chemical drug				0.0321	PTGS2
	CSNK1E		kinase				0.0321	PER1
	pinoresinol		chemical - endogenous non-mammalian				0.0321	PTGS2
	LPXN		transcription regulator				0.0321	ACTA2
	kahweol		chemical - endogenous non-mammalian				0.0321	NFATC1
	SERTAD1		transcription regulator				0.0321	SET
	SLA		other				0.0321	CD3E
	SNAPC5		transcription regulator				0.0321	ADRB2
	SIT1		other				0.0321	CD5
	PURB		transcription regulator				0.0321	ACTA2
	FGD5-AS1		other				0.0321	RORA
	17alpha-hydroxyprogesterone caproate		chemical drug				0.0321	PTGS2
	RIPPLY2		other				0.0321	EPHA4
	NFATC2IP		other				0.0321	NFATC1
	miR-222-5p (miRNAs w/seed UCAGUAG)		mature microRNA				0.0321	ACTA2
	SGCA		other				0.0321	SGCB
	EEF1D		translation regulator				0.0321	COL2A1
	RBM5-AS1		other				0.0321	YAP1
	MYH11		other				0.0321	ACTA2
	TRIM63	1.28	enzyme				0.0321	FBXO32
	FTMT		enzyme				0.0321	FTL
	WWP1		enzyme				0.0321	TP63
	POU3F4		transcription regulator				0.0321	EPHA4
	ZNF350		transcription regulator				0.0321	GADD45A
	KRT5		other				0.0321	SERPINF1
	MYOZ2		other				0.0321	RCAN1
	quercetin-3-O-glucuronide		chemical - endogenous non-mammalian				0.0321	PTGS2
	norisoboldine		chemical - endogenous non-mammalian				0.0321	NFATC1
	ERC1		other				0.0321	PTGS2
	AZIN1		enzyme				0.0321	ACTA2
	H1-1		other				0.0321	GLB1
	umbralisib		chemical drug				0.0321	EIF4B
	temocapril		chemical reagent				0.0321	PTGS2
	AA-861		chemical reagent				0.0321	PTGS2
	amifostine		chemical drug				0.0321	PTGS2
	rocuronium		chemical drug				0.0321	PTGS2
	incyclinide		chemical drug				0.0321	PTGS2
	10-decarbamoylmitomycin C		chemical toxicant				0.0321	GADD45A
	TTI-101		chemical drug				0.0321	ACTA2
	G141		chemical reagent				0.0321	RUNX2
	REC2923		chemical reagent				0.0321	PCK1
	NC9		chemical reagent				0.0321	YAP1
	NSOP00313		chemical reagent				0.0321	ACTA2
	tenidap		chemical drug				0.0321	PTGS2
	acacetin		chemical - endogenous non-mammalian				0.0321	PTGS2
	glycocholic acid		chemical - endogenous mammalian				0.0321	TP63
	aluminum		chemical drug				0.0321	RUNX2
	poly(ADP-ribose)		chemical - endogenous mammalian				0.0321	PTGS2
	poly(C)RNA		chemical reagent				0.0321	PTGS2
	d18:1/48:2 omega-O-linoleoyl-ceramide		chemical - endogenous mammalian				0.0321	Flg
	epiallopregnanolone		chemical - endogenous mammalian				0.0321	PTGS2
	CD247		transmembrane receptor				0.0321	CD3E,HTATSF1,NASP
	napabucasin		chemical drug				0.0321	EPCAM,KLF4,YAP1
	BACH1		transcription regulator				0.0334	FTL,HK2,PDK4
	mitomycin C		chemical drug				0.0334	GADD45A,SRSF6,TP63
	homocysteine		chemical - endogenous mammalian				0.0335	ACADS,FOSL2,GADD45A,PTGS2
	PYCARD		transcription regulator				0.0342	ACTA2,PTGS2
	EPCAM	0.588	other				0.0342	EPCAM,RUNX2
	GNA15		enzyme				0.0344	ACTA2,GADD45A,MAFK,PTGS2
	FOXA1		transcription regulator				0.0354	ACTA2,MYL9,PCK1,RORA,SLC10A6
	vitamin E		chemical drug				0.0361	ACTA2,COL2A1,PTGS2
	NFATC3		transcription regulator				0.0361	ACTA2,NFATC1,PTGS2
	sodium arsenite		chemical drug				0.0361	GADD45A,HK2,PCK1
	Histone h2a		group				0.0366	IGF2BP3,RUNX2
	sodium selenite		chemical drug				0.0366	MYF6,PTGS2
	CA4		enzyme				0.0366	Mt4,SLC10A6
	ELOVL5		enzyme				0.0366	PCK1,PDK4
	CLDN6		other				0.0366	Flg,KLF4
	miR-22-3p (miRNAs w/seed AGCUGCC)		mature microRNA				0.0366	ACVR1B,CCDC47
	mir-124		microRNA				0.0366	NFATC1,RUNX2
	PLA2R1		transmembrane receptor				0.0366	CTSA,CTSD
	CRYAB		other				0.0366	COL2A1,FBXO32
	SFN		other				0.0366	DSP,PDK4
	Esrra		transcription regulator				0.0374	DLAT,PCK1,PDK4,PTGS2
	KCNE3		ion channel				0.0374	KLF4,PER1,PTGS2
	Collagen type I (complex)		complex				0.0388	ACTA2,PTGS2,RUNX2
	PDGFB		growth factor				0.0388	ACTA2,PTGS2,SERPINF1
	prexasertib		chemical drug				0.0388	GRIK5,KLF4,PTGS2
	calphostin C		chemical drug				0.0388	ACTA2,MAP3K12,PTGS2
	SMTNL1	0.712	other				0.039	HK2,PTGS2
	trans-cinnamaldehyde		chemical drug				0.039	PTGS2,TXNRD1
	MAP3K12	-0.554	kinase				0.039	RPS18,RPS8
	ASXL2		other				0.039	CFD,HK2
	B2M		transmembrane receptor				0.039	CD8B,HLA-DQA1
	PTCH1		transmembrane receptor				0.039	COL2A1,GADD45A
	NPC2		transporter				0.039	CTSB,PTGS2
	GABARAPL2		other				0.039	CTSB,NAGLU
	hydroxypropyl-beta-cyclodextrin		chemical drug				0.039	CTSB,CTSD
	curdlan		chemical - endogenous non-mammalian				0.039	Acp5,NFATC1
	TAZ		enzyme				0.0394	ACTA2,ADAMTS1,ADRB2,PTGS2,RUNX2
	DKK1		growth factor				0.0403	ACTA2,EPCAM,RUNX2
	taurocholic acid		chemical - endogenous mammalian				0.0415	PTGS2,TP63
	GABARAPL1		other				0.0415	CTSB,NAGLU
	tosedostat		chemical drug				0.0415	CHAC1,GADD45A
	BMPR2		kinase				0.0415	EPHA4,RUNX2
	vismodegib		chemical drug				0.0415	CCL21,KLF4
	POLG		enzyme				0.0415	RPL23,RPL5
	OXT		other				0.0415	PTGS2,RCAN1
	RPSA		translation regulator				0.0415	Ifi202b,PTGS2
	mir-214		microRNA				0.0415	PCK1,PTGS2
	FAAH		enzyme				0.0415	RPL5,RPS18
	IRAK3		kinase				0.0415	ACTA2,ETS2
	PD 123319		chemical drug				0.0415	FOSL2,PTGS2
	silibinin		chemical drug				0.0417	KLF4,NFATC1,PTGS2
	ARV771		chemical reagent				0.0426	TP63
	cumambrin A		chemical reagent				0.0426	Acp5
	8-chloro-cAMP		chemical drug				0.0426	PTGS2
	dienogest		chemical drug				0.0426	PTGS2
	SHP		group				0.0426	PCK1
	stevioside		chemical - endogenous non-mammalian				0.0426	PTGS2
	1-methyl-2-pyrrolidinone		chemical drug				0.0426	NFATC1
	RAR ligand-RARÎ±-Retinoic acid-RXRÎ±		complex				0.0426	SLC10A1
	tylophorine		chemical drug				0.0426	PTGS2
	PHA-665752		chemical drug				0.0426	PTGS2
	nebivolol		chemical drug				0.0426	PTGS2
	ZNF282		transcription regulator				0.0426	CTSD
	NPSR1		G-protein coupled receptor				0.0426	GADD45A
	ATF6B		transcription regulator				0.0426	RCAN1
	TSPAN33		other				0.0426	PTGS2
	GNL3L		other				0.0426	ADRB2
	Carlr		other				0.0426	PTGS2
	GLIPR2		other				0.0426	ACTA2
	HSPBP1		other				0.0426	HSPA2
	YTHDF2		other				0.0426	KLF4
	SOX12		transcription regulator				0.0426	CD3E
	C1QL3		other				0.0426	PCK1
	ANKRD13C		other				0.0426	ADRB2
	TMEM119		other				0.0426	RUNX2
	RPRD1A		other				0.0426	CTSB
	GATAD2A		transcription regulator				0.0426	PTGS2
	Eif2		complex				0.0426	PTGS2
	danusertib		chemical drug				0.0426	GADD45A
	RBBP5		transcription regulator				0.0426	CTSD
	ZFYVE9		peptidase				0.0426	ACTA2
	ACTC1		enzyme				0.0426	ACTA2
	PKIA		other				0.0426	PCK1
	ARID5B		transcription regulator				0.0426	ACTA2
	SLA2		other				0.0426	CD3E
	UBE2K		transcription regulator				0.0426	ACTA2
	Bc1		translation regulator				0.0426	ACTA2
	mir-483		microRNA				0.0426	CKB
	mir-431		microRNA				0.0426	EHF
	GBP1		enzyme				0.0426	VWF
	ANKH		transporter				0.0426	COL2A1
	K-604		chemical drug				0.0426	PTGS2
	GCLC		enzyme				0.0426	SLC39A8
	IK		cytokine				0.0426	CIITA
	17-epi-resolvin D1		chemical - endogenous mammalian				0.0426	PTGS2
	anatabine		chemical - endogenous non-mammalian				0.0426	PTGS2
	BAG2		other				0.0426	CTSB
	SGCG		other				0.0426	SGCB
	STEAP4		enzyme				0.0426	TP63
	DCC		transmembrane receptor				0.0426	YAP1
	WNT6		other				0.0426	RUNX2
	RGD1560225		other				0.0426	PTGS2
	SETD3		enzyme				0.0426	MYF6
	DOCK5		other				0.0426	PCK1
	SKLB023		chemical reagent				0.0426	PTGS2
	ribociclib		chemical drug				0.0426	YAP1
	dexpramipexole		chemical drug				0.0426	HK2
	TBPL1		transcription regulator				0.0426	TP63
	ANXA6		ion channel				0.0426	RUNX2
	CAY10397		chemical reagent				0.0426	PTGS2
	GR-MD-02		chemical drug				0.0426	ACTA2
	(+)-epicatechin		chemical drug				0.0426	PTGS2
	PDGFRbeta-recognizing cyclic peptide		chemical reagent				0.0426	ACTA2
	1-butanol		chemical - endogenous non-mammalian				0.0426	PTGS2
	aminooxyacetic acid		chemical reagent				0.0426	PCK1
	bumetanide		chemical drug				0.0426	PTGS2
	glabridin		chemical - endogenous non-mammalian				0.0426	NFATC1
	deltamethrin		chemical toxicant				0.0426	NFATC1
	betamethasone valerate		chemical drug				0.0426	PTGS2
	ethyl linoleate		chemical - endogenous mammalian				0.0426	PTGS2
	SKL-2001		chemical reagent				0.0426	ACADS
	cadmium sulfate		chemical toxicant				0.0426	PTGS2
	vanadium pentoxide		chemical toxicant				0.0426	PTGS2
	ruthenium red		chemical reagent				0.0426	COL2A1
	1,1-diethyl-2-hydroxy-2-nitrosohydrazine		chemical toxicant				0.0426	GADD45A
	pubchem compound 25247557		chemical reagent				0.0426	PDK4
	1-eicosapentaenoylglycerol		chemical reagent				0.0426	PTGS2
	flavone		chemical - endogenous non-mammalian				0.0426	PTGS2
	ecdysterone		chemical - endogenous mammalian				0.0426	RUNX2
	CIL56		chemical reagent				0.0426	YAP1
	TEAD1		transcription regulator				0.0432	ACTA2,PTGS2,TP63
	ELK1		transcription regulator				0.0432	PTGS2,RUNX2,SOX18
	chloroquine		chemical drug				0.0432	CTSD,RCAN1,RUNX2
	POU2F1		transcription regulator				0.0436	GADD45A,GAS5,Ifi202b,VWF
	anakinra		biologic drug				0.0441	PTGS2,SLC10A1
	selumetinib		chemical drug				0.0441	FOSL2,RUNX2
	GABARAP		transporter				0.0441	CTSB,NAGLU
	SRSF1		other				0.0441	Rsrc2,SRSF6
	USP18		peptidase				0.0441	Acp5,NFATC1
	VTN		other				0.0441	PTGS2,RUNX2
	crocidolite asbestos		chemical toxicant				0.0441	FOSL2,GADD45A
	SOX1		transcription regulator				0.0447	DSP,TXNRD1,YAP1
	PRKD1		kinase				0.0447	Acp5,CD5,PTGS2
	miR-145-5p (and other miRNAs w/seed UCCAGUU)		mature microRNA				0.0462	ACTA2,KLF4,MYL9
	Brd4		kinase				0.0462	ACTA2,KLF4,SRSF6
	Stat3-Stat3		complex				0.0467	FTL,RORA
	grape seed extract		chemical drug				0.0467	CKB,PTGS2
	APEX1		enzyme				0.0467	NCL,PTGS2
	NCOA4		transcription regulator				0.0467	EHF,FTL
	selenium		chemical drug				0.0467	PTGS2,TXNRD1
	GHRL		growth factor				0.0478	MYF6,PCK1,PTGS2
	STK40		kinase				0.0494	ACTA2,HLA-DQA1,PTGS2
	mir-135		microRNA				0.0494	KLF4,RUNX2
	PRKD		group				0.0494	PDK4,PTGS2
	MARK2		kinase				0.0494	PTGS2,RILPL1
	NF1		other				0.0494	NCL,PCK1
	GRN		growth factor				0.0494	COL2A1,CTSD
	sodium tungstate		chemical drug				0.0494	CKB,PDHA1
	MYC		transcription regulator	Activated	3.766		6.38e-06	ADAMTS1,CBFA2T3,COL2A1,CTSB,CTSD,DDX3X,DSP,EPCAM,FBXO32,Flg,GAA,GADD45A,HK2,IRF6,KLF4,MYL9,NCL,NOP58,PCK1,PDHA1,PTGS2,RCAN1,RPL23,RPL5,RPS18,RPS23,RPS8,SEMA4A,TXNRD1,YAP1,YME1L1,YTHDC1	62 (12)
	TNF		cytokine	Activated	3.192		5.95e-06	ACADS,Acp5,ACTA2,ADRB2,ARRDC3,CCL21,CD3E,CD5,CFD,CIITA,COL2A1,CTSB,DEPTOR,EHF,EPCAM,ETS2,FBXO32,FOSL2,GADD45A,GAS5,HK2,KLF4,LAD1,LTB4R2,NAGLU,NFATC1,PCK1,PDE4B,PLVAP,PTGS2,RCAN1,RORA,RUNX2,SERPINF1,SLC10A1,SLC39A8,THAP12,TP63,TRIM63,TXNRD1,UACA,YAP1,ZNF330	93 (17)
	metribolone		chemical reagent	Activated	2.925	bias	0.00342	ADAMTS1,DLAT,DLD,ERRFI1,HK2,HMGCS1,HOMER2,PDHA1,SUCLG2,TACC2,TCIRG1,UAP1	68 (8)
	levodopa		chemical - endogenous mammalian	Activated	2.828		0.000423	ACTA2,ARPP19,CHAC1,CTSB,ETS2,FTL,GLB1,KLF9,Krt10,NAGLU,NASP,PER1,PLD4,RILPL1,Rsrc2,SLC66A1,TCIRG1,TRAPPC1
	methylprednisolone		chemical drug	Activated	2.719		0.0477	CD22,DGKZ,DSG1,FBXO32,GADD45A,GAS5,IVNS1ABP,KLF9,LAD1,NCL,PKP1,SLC10A1
	forskolin		chemical toxicant	Activated	2.606		0.00141	ACTA2,ADAMTS1,EPHA4,ERRFI1,FOSL2,GADD45A,HK2,HLA-DQA1,HSPA2,Ifi202b,KLF4,PCK1,PDE4B,PDK4,PER1,PTGS2,RASGEF1B,RUNX2	71 (14)
	IL1B		cytokine	Activated	2.544		0.00645	ACTA2,ADAMTS1,ADRB2,CIITA,COL2A1,CTSB,EHF,ERRFI1,ETS2,GADD45A,GAS5,HK2,IGF2BP3,PDE4B,PDHA1,PTGS2,RCAN1,RORA,RUNX2,SLC10A1,UAP1	90 (17)
	Lh		complex	Activated	2.509		0.00158	ACTA2,ADAMTS1,HK2,PER1,PTGS2,RPL23,RPL5,RPS18,RPS23,RPS8,RUNX2	75 (16)
	leukotriene D4		chemical - endogenous mammalian	Activated	2.449	bias	2.8e-05	ADAMTS1,FOSL2,KLF4,PDK4,PTGS2,RCAN1	40 (7)
	KLF4	0.507	transcription regulator	Activated	2.443		1.43e-05	ACTA2,ADAMTS1,ADRB2,CBFA2T3,DSP,EPCAM,Flg,GADD45A,IRF6,KLF4,RCAN1,RUNX2,TXNRD1,YAP1	29 (4)
	POU5F1		transcription regulator	Activated	2.44		7.66e-06	CBFA2T3,CTSA,CTSB,CTSD,DSP,EPCAM,Flg,GAA,GADD45A,GLB1,HK2,IRF6,KLF4,RCAN1,TXNRD1,YAP1	21 (3)
	MLXIPL		transcription regulator	Activated	2.433	bias	0.00117	MID1IP1,PCK1,RPL23,RPL5,RPS18,RPS23,RPS8
	Ca2+		chemical - endogenous mammalian	Activated	2.43		0.00309	ACTA2,COL2A1,Flg,FOSL2,KLF4,PER1,PLA2G2F,PTGS2,RUNX2	48 (12)
	thapsigargin		chemical toxicant	Activated	2.423		0.0033	CHAC1,COL2A1,DDX3X,ERRFI1,GADD45A,KLF4,RCAN1,TXNRD1	67 (10)
	MAPK7		kinase	Activated	2.404	bias	0.000302	ADAMTS1,ADRB2,HMGCS1,KLF4,PTGS2,TP63	46 (7)
	diclofenac		chemical drug	Activated	2.355		0.000439	DNAJB6,EIF4A2,KLF4,KLF9,MID1IP1,PTGS2	17 (3)
	MYCN		transcription regulator	Activated	2.345		0.011	ADAMTS1,CIITA,FBXO32,HK2,NCL,RPL23,RPL5,RPS23,RPS8
	HGF		growth factor	Activated	2.323	bias	3.53e-05	ACTA2,ADAMTS1,CHD2,COL2A1,DDX3X,DSG1,EHF,EPCAM,EPHA4,ERRFI1,HK2,NFATC1,PCK1,PTGS2,RUNX2,TP63,TRIP10	82 (19)
	TCF7L2		transcription regulator	Activated	2.263	bias	0.0129	EPCAM,FBXO32,HSPA2,MAP7,PCK1,PLEKHA1,PTGS2,RASGEF1B,TP63,YAP1
	STAT5a/b		group	Activated	2.236		0.00262	EPHA4,PCK1,PDE4B,PTGS2,SLC10A1,VWF
	Salmonella enterica serotype abortus equi lipopolysaccharide		chemical toxicant	Activated	2.236	bias	0.0369	ABL2,ADRB2,ETS2,GADD45A,PTGS2
	BMP6		growth factor	Activated	2.2		0.000943	ACTA2,ADAMTS1,ERRFI1,KLF4,PTGS2,TXNRD1	48 (7)
	LDLR		transporter	Activated	2.2		0.0172	DLAT,DLD,GJA4,HK2,MID1IP1,PCK1,RUNX2
	MAP3K14		kinase	Activated	2.196	bias	0.00186	ACTA2,GADD45A,PTGS2,RCAN1,YAP1	41 (4)
	ROCK2		kinase	Activated	2.183		0.000477	ACTA2,DSG1,DSP,HK2,MYF6
	lovastatin		chemical drug	Activated	2.176		0.0059	ADAMTS1,CIITA,HMGCS1,KLF4,PTGS2,VWF
	PTEN		phosphatase	Activated	2.175		0.00497	CFD,CTSB,DLAT,DLD,DYNC1LI2,ERRFI1,ETS2,GSDMA,HMGCS1,LAD1,MAFK,Neat1,NFATC1,PDHA1,PTGS2,SUCLG2	48 (3)
	PDGF BB		complex	Activated	2.085		0.0294	ACTA2,ADRB2,ETS2,GADD45A,HMGCS1,HOMER2,MAFK,PTGS2
	lipopolysaccharide		chemical drug	Activated	2.076		1.35e-06	ACTA2,ADRB2,CALML5,CBFA2T3,CCL21,CD22,CD300LD,CD3E,CFD,CIITA,CTSB,DDX3X,EHF,ETS2,FBXO32,Fnbp1l,GADD45A,GAS5,GGCT,HK2,HLA-DQA1,Ifi202b,IVNS1ABP,KLF4,LAD1,LTB4R2,MAGED1,MYL9,NCL,NFATC1,PDE4B,PDK4,PLA2G2F,PLD4,PLEKHA1,PPP1CB,PTGS2,RASGEF1B,RCAN1,RORA,RUNX2,SERPINF1,SLC10A1,SLC39A8,SP6,TP63,TRIM63,VWF,YAP1,ZNF366	93 (16)
	cigarette smoke		chemical toxicant	Activated	2.029		0.000775	ACTA2,CKB,FBXO32,Flg,FTL,KLF4,LTB4R2,PTGS2,TRIM63,TXNRD1	91 (18)
	STAT4		transcription regulator	Activated	2	bias	0.00322	DNAJB6,ERRFI1,GAS5,Ifi202b,KLF9,MAGED1,PER1,RORA
	cobalt chloride		chemical reagent	Activated	2		0.0039	ACTA2,ADAMTS1,HK2,PTGS2,SERPINF1	91 (17)
	G protein alphai		group	Activated	2	bias	0.0089	ADAMTS1,FOSL2,KLF4,SP6
	5-O-mycolyl-beta-araf-(1->2)-5-O-mycolyl-alpha-araf-(1->1')-glycerol		chemical - endogenous non-mammalian	Activated	2	bias	0.0136	NLRC3,PDE4B,PTGS2,RCAN1
	MTOR		kinase	Activated	2		0.0186	FBXO32,HK2,PDHA1,PDK4,RPL23,RPS18,RUNX2,SGCB,TRIM63
	IL3		cytokine	Activated	2	bias	0.0337	FOSL2,GADD45A,HK2,HSPA2,KLF9,NCL,NFATC1,RPL5
	bee venom		chemical - endogenous non-mammalian		1.997		0.00426	ETS2,GADD45A,KLF4,PTGS2,RCAN1	37 (3)
	tunicamycin		chemical - endogenous non-mammalian		1.994		0.0315	ACTA2,CHAC1,COL2A1,GADD45A,HOOK1,KLF4,PTGS2
	CGA		other		1.982		0.0265	ADAMTS1,HOMER2,KLF9,PTGS2
	bicuculline		chemical - endogenous non-mammalian		1.964		0.00336	ACTA2,HK2,KLF4,PTGS2	49 (8)
	TGFA		growth factor		1.946	bias	0.0121	DDX3X,ERRFI1,FOSL2,PTGS2
	E. coli B5 lipopolysaccharide		chemical - endogenous non-mammalian		1.938		0.0243	ADAMTS1,ADRB2,CRK,ERRFI1,ETS2,PDE4B,PTGS2
	NGF		growth factor		1.934		0.0416	EPHA4,ERRFI1,FOSL2,GADD45A,MAFK,MAP3K12
	SMARCA4		transcription regulator		1.912	bias	0.00407	ACTA2,CIITA,CLK1,CTSB,DYNLT3,EHF,EPHA4,ETS2,FGFBP1,FOSL2,GADD45A,IRF6,PDE4B,RUNX2,TXNRD1	20 (2)
	kainic acid		chemical toxicant		1.91		0.0316	ERRFI1,FOSL2,GRIK5,PER1,PTGS2
	Pkc(s)		group		1.813		0.000705	ACTA2,CTSB,FGFBP1,Flg,GADD45A,IRF6,MAFK,PER1,PTGS2	72 (14)
	ANGPT2		growth factor		1.718	bias	0.031	ACTA2,HMGCS1,HSPA2,PTGS2,RCAN1,RDH10
	EGFR		kinase		1.693		0.0004	ACTA2,CLK1,EPCAM,FAM234A,FOSL2,GADD45A,GAS5,HK2,IGF2BP3,IVNS1ABP,NCL,NUP210,PTGS2,RUNX2,SERBP1	105 (18)
	ESRRA		transcription regulator		1.682	bias	0.00958	ADRB2,CKB,GSDMA,HK2,HMGCS1,KRT24,PDK4,RUNX2	15 (3)
	EGF		growth factor		1.681		0.0109	ADAMTS1,CTSD,EPCAM,ERRFI1,ETS2,FOSL2,GADD45A,HMGCS1,NCL,PDK4,PER1,PTGS2,RUNX2,TP63
	TP63	0.635	transcription regulator		1.676		0.0172	ACTA2,ADAMTS1,CTSD,Flg,FOSL2,GADD45A,HK2,PKP1,RUNX2,SERPINF1,TP63
	dexamethasone		chemical drug		1.674		2.63e-06	ACADS,Acp5,ACTA2,ADAMTS1,ADRB2,CCL21,CD22,CD3E,CD8B,CFD,CTSB,CTSD,CTSW,EHF,ERRFI1,ETS2,FBXO32,FGFBP1,FOSL2,FTL,GADD45A,GGCT,GPLD1,HK2,HOMER2,Ifi202b,IP6K3,KLF4,KLF9,LAD1,MID1IP1,NFATC1,PCK1,PDE4B,PDK4,PER1,PLD4,PPP1CB,PTGS2,RCAN1,RORA,RPL5,RPS23,RUNX2,SERPINF1,SLC10A1,SLC10A6,TCIRG1,TRIM63	95 (15)
	CD3		complex		1.672	bias	2.29e-05	ACADS,CD3E,CD5,CD8B,CLK1,CTSW,EEF1A2,ETS2,FTL,HNRNPR,HOMER2,NASP,NCL,NFATC1,PCYOX1,PDE4B,PTGS2,RORA,TRIP10,TXNRD1	50 (5)
	STAT3		transcription regulator		1.653		0.0145	ACTA2,CIITA,CTSB,GADD45A,HK2,HLA-DQA1,Ifi202b,KLF4,MYF6,NFATC1,PCK1,PTGS2,RORA,TMC8
	tetradecanoylphorbol acetate		chemical drug		1.635		0.0122	ADAMTS1,ALOXE3,CIITA,CTSB,CTSD,DSG1,EPHA4,ERRFI1,ETS2,FGFBP1,Flg,FOSL2,HSPA2,KLF4,NFATC1,PCK1,PDK4,PER1,PLA2G15,PTGS2,RCAN1,SLC39A8
	RELA		transcription regulator		1.525	bias	0.00222	ACTA2,CIITA,COL2A1,CTSB,EHF,ELMO1,EPCAM,NFATC1,PCK1,PDE4B,PTGS2,RUNX2,TP63	104 (19)
	CEBPB		transcription regulator		1.492	bias	0.00704	ACTA2,ARPP19,CFD,FBXO32,FTL,GADD45A,NASP,PCK1,PDK4,PTGS2,RCAN1,RORA,RUNX2,SLC10A1	96 (19)
	CREB1		transcription regulator		1.475		0.0104	ALOXE3,CIITA,ERRFI1,GAA,GADD45A,HMGCS1,Ifi202b,KLF4,PCK1,PER1,PTGS2,RASGEF1B,SEMA4A
	INSR		kinase		1.471		0.00327	ACADS,ARRDC3,CTSB,GADD45A,HMGCS1,Ifi202b,KLF9,PCK1,PDE4B,PDHA1,PDK4,RAB18,RPL5,THAP12	57 (7)
	5-N-ethylcarboxamido adenosine		chemical reagent		1.432		0.00862	CIITA,EPCAM,GADD45A,HK2,HLA-DQA1	80 (10)
	aflatoxin B1		chemical - endogenous non-mammalian		1.414	bias	0.0156	CFD,EHF,EPCAM,GPLD1,HLA-DQA1,SGCB,TRIM16,TXNRD1
	simvastatin		chemical drug		1.404		0.00265	ACTA2,ADAMTS1,ADRB2,CIITA,KLF4,NFATC1,PTGS2,VWF	81 (17)
	MET		kinase		1.387		0.00071	FBXO32,GSDMA,KLF4,PTGS2,RILPL1,SP6,TRIM63	60 (12)
	AMPK		complex		1.387		0.0102	CIITA,FBXO32,PCK1,PTGS2,RUNX2
	EZH2		transcription regulator		1.387		0.016	ABL2,ADRB2,Flg,GRIK5,IGF2BP3,KLF4,PER1,PTGS2,RORA,RUNX2
	EGR1		transcription regulator		1.387	bias	0.0192	ACTA2,CCL21,COL2A1,FTL,GADD45A,PTGS2
	5-azacytidine		chemical drug		1.364	bias	0.0427	CIITA,GADD45A,HK2,KLF4,PTGS2
	INS		other		1.363		0.00217	ACTA2,DEPTOR,ERRFI1,FOSL2,PCK1,PTGS2,RDH10	98 (17)
	prostaglandin E2		chemical - endogenous mammalian		1.36		0.00727	ACTA2,ADAMTS1,Fnbp1l,FOSL2,KLF4,LAD1,PDE4B,PTGS2,RASGEF1B,RUNX2	72 (16)
	15-deoxy-delta-12,14 -PGJ 2		chemical - endogenous mammalian		1.342		6.5e-05	ACTA2,CIITA,CTSB,CTSD,EHF,GADD45A,KLF4,PTGS2,RORA,RUNX2,TXNRD1	84 (15)
	trovafloxacin		chemical drug		1.342		0.00085	ADRB2,CRK,ERRFI1,ETS2,PDE4B	45 (7)
	ID2		transcription regulator		1.342		0.00313	ACTA2,CBFA2T3,ETS2,HOMER2,IRF6,NFATC1,PTPN3,RORA	17 (3)
	RGS2		enzyme		1.342		0.00445	CTSA,ERRFI1,MAGED1,PLVAP,RCAN1
	ID3		transcription regulator		1.342		0.00606	CBFA2T3,ETS2,HOMER2,IRF6,NFATC1,PTPN3,RORA	16 (2)
	IL2		cytokine		1.319		0.0484	ACVR1B,CD5,CD8B,CTSW,EPHA4,GPLD1,HK2,HLA-DQA1,HMGCS1,PDE4B,PTGS2,PTPN3,RASGEF1B
	ATF4		transcription regulator		1.299	bias	0.000396	CHAC1,GADD45A,GHITM,KLF4,KLF9,MID1IP1,PCK1,PTGS2,SERPINF1	15 (2)
	salmonella minnesota R595 lipopolysaccharides		chemical - endogenous non-mammalian		1.257	bias	0.0426	ETS2,HLA-DQA1,PDE4B,PTGS2
	cycloheximide		chemical reagent		1.255		0.0093	COL2A1,EIF4B,FOSL2,GADD45A,GLB1,PTGS2,RCAN1,RUNX2,UACA,YME1L1	78 (16)
	rosiglitazone		chemical drug		1.248		0.00031	ACADS,ADAMTS1,CFD,CIITA,DLD,KLF4,PCK1,PDHA1,PDK4,PLA2G15,PTGS2,RORA,RUNX2,SERPINF1,TRIM63	83 (17)
	N-acetyl-L-cysteine		chemical drug		1.235		0.00162	Acp5,ACTA2,FBXO32,GLB1,HK2,NFATC1,PTGS2,RUNX2,TRIM63	89 (18)
	SPP1		cytokine		1.23		0.00112	Acp5,DSP,ETS2,HOMER2,PNN,PTGS2,RUNX2,SERPINF1	75 (13)
	PTHLH		other		1.221		0.00197	ADAMTS1,COL2A1,FOSL2,PTGS2,RUNX2	81 (16)
	CD28		transmembrane receptor		1.203		0.0056	CD3E,CLK1,HK2,HOMER2,NCL,NFATC1,PCYOX1,PDE4B,PTGS2,RORA	92 (14)
	fluticasone propionate		chemical drug		1.195		0.00283	HLA-DQA1,KLF9,PDK4,RCAN1,SERPINF1,SIGLEC10,VWF
	NR4A2		ligand-dependent nuclear receptor		1.192		0.0198	ABL2,GPLD1,PTGS2,SLC39A8
	HRAS		enzyme		1.188		0.00312	CHST12,COL2A1,CTSB,FGFBP1,FOSL2,Ifi202b,LTB4R2,MYL9,NOP58,NUCKS1,PCK1,PKP1,PTGS2,RPL23,TP63,YAP1	82 (17)
	progesterone		chemical - endogenous mammalian		1.183		0.0375	ACTA2,ADAMTS1,ADRB2,ART3,CFD,CTSD,ERRFI1,GGCT,HSPA2,KLF9,PCK1,PDHA1,PTGS2
	fisetin		chemical drug		1.154	bias	0.00108	Acp5,NFATC1,PCK1,PTGS2	65 (11)
	USF1		transcription regulator		1.154	bias	0.0131	CIITA,FBXO32,PCK1,PTGS2
	mifepristone		chemical drug		1.139		0.0101	COL2A1,CTSD,EHF,EPCAM,ERRFI1,GLB1,KLF4,PTGS2,RUNX2
	phytohemagglutinin		chemical drug		1.134	bias	0.0494	FOSL2,GJA4,GPLD1,NAGLU,PCYOX1,PLA2G2F,PTPN3
	AICAR		chemical - endogenous mammalian		1.131		0.0265	ACTA2,HK2,PDK4,RUNX2
	NFKB1		transcription regulator		1.125	bias	0.042	CIITA,COL2A1,CTSB,EHF,GADD45A,NFATC1,PTGS2
	SFRP1		transmembrane receptor		1.122		0.00295	ACTA2,EPCAM,PCK1,RUNX2	50 (7)
	STAT6		transcription regulator		1.11		0.013	Acp5,ADAP1,CTSB,CTSW,CYB561A3,Flg,NFATC1,PDK4,PTGS2,RNPEP,SERPINF1
	25-hydroxycholesterol		chemical reagent		1.109		0.00773	CHAC1,FOSL2,HMGCS1,PTGS2
	LIPE		enzyme		1.091		9.57e-06	CLK1,HLA-DQA1,PCK1,PDHA1,PDK4,PER1,PTGS2,RUNX2,SOX18	53 (7)
	tert-butyl-hydroquinone		chemical reagent		1.091	bias	0.0198	FOSL2,FTL,GADD45A,TXNRD1
	INHA		growth factor		1.091		0.0281	ACTA2,ADAMTS1,MYL9,PTGS2
	IL17A		cytokine		1.079		0.0433	ACTA2,COL2A1,GADD45A,NFATC1,PTGS2,TP63,VWF
	doxorubicin		chemical drug		1.068		0.0272	ADAMTS1,CTSB,CTSD,GADD45A,GAS5,GLB1,PTGS2,TP63,TRIM63,UACA
	PLIN5		other		1.067		0.000987	ACTA2,MAFK,PDK4,TXNRD1
	NPY		other		1.067		0.00539	PCK1,PER1,RCAN1,TTC7A
	KDM8		enzyme		1.067	bias	0.00811	Acp5,HK2,PDHA1,PDK4
	KAT2A		enzyme		1.067		0.0447	ADAMTS1,FBXO32,PCK1,TRIM63
	POR		enzyme		1.067		0.0472	CIITA,ETHE1,HLA-DQA1,HMGCS1,PDK4
	Creb		group		1.044		0.0317	ABL2,ACTA2,CTSB,DYNC1LI2,PCK1,PDE4B,PER1,PTGS2
	PPARD		ligand-dependent nuclear receptor		1.029		0.00918	ACTA2,CYB561A3,PCYOX1,PDK4,PTGS2,RUNX2,Snhg5,TRIM63	70 (13)
	FYN		kinase		1		0.00179	CD5,Flg,PTGS2,RORA
	CUL3		enzyme		1		0.00295	BTBD1,CD22,COL2A1,FBXO32
	phosphate		chemical - endogenous mammalian		1		0.0249	CHST12,HK2,RUNX2,THAP12
	camptothecin		chemical drug		1		0.0346	ACTA2,AKAP8,CD22,CD300C,CHAC1,CLTB,DGKZ,GADD45A,GPLD1,HLA-DQA1,NCL,PTGS2
	hydrogen peroxide		chemical - endogenous mammalian		0.989		0.0129	ACTA2,CFD,CTSB,CTSD,ETS2,FBXO32,GADD45A,KLF4,PTGS2,RPL5,RUNX2,UACA
	miR-17-5p (and other miRNAs w/seed AAAGUGC)		mature microRNA		0.975	bias	0.0159	ACTA2,MAP3K12,RUNX2,TP63
	FOXA2		transcription regulator		0.97		0.00137	ACTA2,EPCAM,HK2,Krt2,MYL9,PCK1,RORA,SLC10A1,SLC10A6
	CTNNB1		transcription regulator		0.958		0.000228	ACADS,ACTA2,CFD,COL2A1,ELMO1,EPCAM,FGD2,FGFBP1,HK2,HMGCS1,NFATC1,PCK1,PDE4B,PTGS2,RAB18,RPL23,RPL5,RPS18,RPS23,RPS8,RUNX2,SP6,TP63,YAP1	76 (16)
	ATG7		enzyme		0.946		0.00104	ACTA2,CTSB,HK2,RCAN1,SET,SLC37A2	46 (7)
	IL6		cytokine		0.945		0.00667	Acp5,ACTA2,ADAMTS1,CFD,CIITA,COL2A1,EPHA4,ERRFI1,ETS2,GADD45A,HLA-DQA1,Ifi202b,PTGS2,RORA,RUNX2,SEMA4A,SLC10A1	72 (14)
	dihydrotestosterone		chemical - endogenous mammalian		0.922		0.000535	Acp5,ADAMTS1,DYNC1LI2,FBXO32,FTL,HK2,HOMER2,Ifi202b,PCK1,PER1,PTGS2,RPL5,RPS23,RUNX2,TACC2,UAP1,YTHDC1	83 (17)
	Notch		group		0.896		0.00554	ACTA2,ADAP1,EPCAM,NFATC1,PLD4,TP63	69 (12)
	Vegf		group		0.877	bias	0.0119	ACTA2,ADAMTS1,DDX3X,EHF,EPHA4,HK2,NFATC1,PDK4,PLVAP,PTGS2,RCAN1,VWF
	MAPK8		kinase		0.877		0.0145	BDP1,FOSL2,GADD45A,HMGCS1,PTGS2,SLC10A1
	prednisolone		chemical drug		0.861		0.00149	CTSB,FBXO32,GAA,IGF2BP3,KLF9,PCK1,PTGS2,RGS19,TRIM63
	FGF2		growth factor		0.852		0.0224	ACTA2,EPCAM,EPHA4,ERRFI1,GADD45A,GRIK5,HK2,PTGS2,RORA,RUNX2,VWF
	PRKCD		kinase		0.844		0.00487	ALOXE3,CIITA,CTSB,ETS2,FOSL2,PTGS2,RCAN1	81 (14)
	FLT1		kinase		0.816		0.000283	COL2A1,DDX3X,EIF4B,IGF2BP3,LIN7C,VWF
	NCOA2		transcription regulator		0.816		0.00176	CFD,CIITA,HMGCS1,KLF4,PCK1,PTGS2,RORA	81 (14)
	NANOG		transcription regulator		0.816		0.00367	CBFA2T3,CNOT7,IRF6,KLF4,RCAN1,SET
	triamcinolone acetonide		chemical drug		0.816		0.0259	CD22,EPHA4,KLF9,PER1,TACC2,VWF
	PGR		ligand-dependent nuclear receptor		0.802		0.048	ADAMTS1,CTSD,HSPA2,KLF4,KLF9,PTGS2,SLC39A8
	Y 27632		chemical drug		0.749		0.0102	ACTA2,COL2A1,PTGS2,YAP1
	VDR		transcription regulator		0.743		0.00171	ACTA2,DSG1,GADD45A,HK2,NASP,NFATC1,PTGS2,RUNX2,TP63	77 (17)
	IL10		cytokine		0.742		0.0317	ACTA2,CIITA,CTSA,CTSB,CTSD,EHF,ETS2,NFATC1,PDE4B,PTGS2
	TGFB1		growth factor		0.716		1.2e-05	Acp5,ACTA2,ARHGAP27,CALML3,CBFA2T3,CD8B,CFD,CIITA,COL2A1,CTSB,CTSD,DEPTOR,DNAJB6,DSP,ELMO1,EPCAM,FGFBP1,FOSL2,FTL,GADD45A,HK2,HLA-DQA1,HMGCS1,HOOK1,KLF4,KLF9,MAN2B2,NFATC1,NOP58,PTGS2,RAB18,RASGEF1B,RORA,RUNX2,SEMA4A,SERPINF1,SLC39A8,SRSF6,TACC2,TXNRD1,VWF,YAP1	95 (18)
	ESR2		ligand-dependent nuclear receptor		0.711		0.000151	ADAMTS1,CBFA2T3,CD3E,CTSD,FOSL2,GGCT,GLB1,HMGCS1,HSPA2,IP6K3,KLF4,KLHL38,Krt10,NASP,PCYOX1,PDK4,PTGS2,RDH10,RUNX2,VWF	97 (14)
	NKX2-3		transcription regulator		0.707		0.00288	ACTA2,ADAP1,EIF4B,KLF4,PTGS2,RPL23,RPS23,UACA
	SREBF1		transcription regulator		0.704	bias	5.42e-05	ACADS,CFD,ETHE1,FBXO32,GLB1,HK2,HMGCS1,IVNS1ABP,PCK1,PTGS2,RNASET2,TRIM63	83 (14)
	IL4		cytokine		0.675		0.005	Acp5,ACTA2,ADAP1,CD5,CD8B,CIITA,CKB,CYB561A3,DSG1,Flg,GPLD1,HK2,HLA-DQA1,HOMER2,NCL,NFATC1,PDE4B,PTGS2,RASGEF1B,RNPEP,SEMA4A,SLC66A1,YAP1	64 (10)
	CG		complex		0.656		0.0146	ACTA2,ADAMTS1,CBFA2T3,FOSL2,GGCT,HK2,HLA-DQA1,KLF4,PTGS2,RORA,RUNX2
	3,4,5,3',4'-pentachlorobiphenyl		chemical toxicant		0.655		0.0136	CTSD,ETS2,GADD45A,HSPA2
	MED1		transcription regulator		0.64	bias	0.00251	CFD,FGD2,GADD45A,KLF4,LAD1,NCL,PDK4,SLC39A8
	NUPR1		transcription regulator		0.632		4.73e-05	ABL2,ACTA2,ADRB2,ALOXE3,CCDC77,DEPTOR,GADD45A,HK2,HSPA2,IGF2BP3,KLF4,MAN2B2,NUCKS1,PCYOX1,SLC39A8,TRIM16,UAP1
	YAP1	0.523	transcription regulator		0.603	bias	2.13e-05	ACTA2,ADAMTS1,FBXO32,GADD45A,HMGCS1,MYL9,PTGS2,RPL23,RPL5,RPS18,RPS23,RPS8,TP63,TRIM63	71 (14)
	TEAD4		transcription regulator		0.594		0.00594	ACTA2,CBFA2T3,IRF6,RCAN1,TP63
	MAPK9		kinase		0.59		0.0124	BDP1,FOSL2,GADD45A,HMGCS1,NCL,RILPL1
	IKBKG		kinase		0.585	bias	0.0182	CD3E,CTSB,HK2,NAGLU,RCAN1
	decitabine		chemical drug		0.58		0.0041	ADAMTS1,ADRB2,DDX3X,EHF,EIF4B,GLB1,HK2,IGF2BP3,KLF4,MYF6,NFATC1,NUCKS1,PTGS2,RGS19,SMYD2,SRSF6,TP63,YAP1
	2-amino-5-phosphonovaleric acid		chemical - other		0.557		0.00469	ADAMTS1,CGN,CYB561A3,GADD45A,PTGS2,RASGEF1B
	BMP7		growth factor		0.557		0.0463	ACTA2,DSP,EPCAM,KLF4,RUNX2
	IL13		cytokine		0.539		0.0232	Acp5,CD3E,CTSB,DYNLT3,FGD2,HOMER2,NFATC1,PTGS2,SERPINF1,YAP1
	troglitazone		chemical drug		0.534		0.0259	ACADS,ACTA2,CFD,CIITA,GADD45A,KLF4,PCK1,PDK4,PTGS2
	APP		other		0.527		0.0328	ACTA2,ADAP1,ARRDC3,CALML3,CKB,CLTB,CRK,CTSB,CTSD,ETS2,Fnbp1l,PDE4B,PTGS2,RCAN1,SERPINF1,SET,TP63
	IKBKB		kinase		0.525		0.00136	Acp5,CTSB,GADD45A,HK2,NAGLU,PTGS2,RCAN1,TP63,TRIM63,UACA	75 (12)
	WNT5A		cytokine		0.503		0.0196	COL2A1,DGKZ,IGF2BP3,PTGS2,RUNX2,YAP1
	PTH		other		0.498		0.000132	Acp5,ADAMTS1,CARD14,COL2A1,EIF4B,FOSL2,PDK4,PTGS2,RUNX2	70 (15)
	beta-estradiol		chemical - endogenous mammalian		0.496		0.000358	ACTA2,ADAMTS1,ADRB2,ART3,CBFA2T3,CCL21,CFD,CGN,CKB,CRK,CTSB,CTSD,DSP,ERRFI1,FGFBP1,FOSL2,GAA,GADD45A,GLB1,HLA-DQA1,HMGCS1,HSPA2,Ifi202b,IP6K3,IRF6,KLF4,KLF9,KLHL38,Krt10,LPCAT2,NAGLU,NOP58,PCYOX1,PDE4B,PDK4,PPP1CB,PTGS2,RDH10,RUNX2,SET,SGCB,SLC10A1,TP63,TXNRD1,VWF	96 (11)
	Laminin (complex)		complex		0.496		0.00118	ACTA2,ETS2,PTGS2,RUNX2	71 (14)
	TWIST1		transcription regulator		0.485		0.00978	ACTA2,ADAMTS1,COL2A1,EPCAM,MXRA8,RUNX2	28 (5)
	palmitic acid		chemical - endogenous mammalian		0.483		0.00273	CTSB,FBXO32,HK2,KLF4,PCK1,PDK4,PTGS2,RUNX2,TRIM63	93 (15)
	SOX2		transcription regulator		0.474		0.00908	CBFA2T3,DSP,EPCAM,ETS2,Flg,IRF6,KLF4,RASGEF1B,RCAN1,TP63,TXNRD1,YAP1	21 (3)
	Insulin		group		0.458		0.0002	ARRDC3,CFD,ERRFI1,FBXO32,FTL,GPLD1,HK2,HMGCS1,KLF4,PCK1,PDHA1,PDK4,PER1,PTGS2,RUNX2,SERPINF1,TRIM63,YME1L1,ZNF106	63 (13)
	niacinamide		chemical - endogenous mammalian		0.447		0.00282	ACTA2,KLF4,PDK4,PTGS2,RUNX2	87 (18)
	CASR		G-protein coupled receptor		0.447		0.0168	DSG1,GADD45A,NASP,NFATC1,PTGS2
	mono-(2-ethylhexyl)phthalate		chemical toxicant		0.447	bias	0.0331	HK2,NFATC1,PCK1,PDK4,SUCLG2
	CSF3		cytokine		0.447		0.0445	CD300LD,CTSD,GADD45A,HLA-DQA1,NFATC1
	CALCA		other		0.447		0.0454	Acp5,CARD14,EIF4B,FOSL2,RUNX2
	GW9662		chemical reagent		0.44		0.00505	DGKZ,KLF4,MID1IP1,PTGS2,RORA	43 (7)
	chenodeoxycholic acid		chemical - endogenous mammalian		0.434		0.00296	PCK1,PDK4,PTGS2,SLC10A1,TXNRD1	28 (5)
	SIRT1		transcription regulator		0.431		0.0235	COL2A1,FBXO32,GADD45A,HK2,HLA-DQA1,PCK1,PDK4,PER1,RUNX2,TRIM63
	fenofibrate		chemical drug		0.391		0.0088	CCL21,DLAT,FBXO32,GADD45A,PDK4,PTGS2,RORA,TRIM63	84 (14)
	nitrofurantoin		chemical drug		0.378		0.00225	ADAMTS1,COL2A1,CTSB,GADD45A,GAS5,HMGCS1,RPS8
	4-hydroxytamoxifen		chemical drug		0.372		0.00386	CTSD,ERRFI1,FOSL2,PDK4,RGS19,SLC39A8,TRIM16	49 (4)
	SMAD3		transcription regulator		0.359		0.0129	ACTA2,ARHGAP27,CIITA,COL2A1,DEPTOR,PTGS2,RPS8,RUNX2
	IFNG		cytokine		0.351		0.0273	ACTA2,ARPP19,CHAC1,CIITA,CTSB,CTSD,EHF,ETS2,FTL,GAS5,HK2,HLA-DQA1,HMGCS1,Ifi202b,KLF4,Lce1l,PARVG,PCK1,PDHA1,PTGS2,RUNX2,SEMA4A,TCIRG1,TP63,YAP1
	NR3C1		ligand-dependent nuclear receptor		0.343		0.00861	ACTA2,CARD14,ERRFI1,Flg,GADD45A,IP6K3,KLF9,LAD1,NFATC1,NLRP10,PCK1,PDE4B,PER1,PPP1CB,PTGS2,RUNX2	112 (20)
	LDB1		transcription regulator		0.333		0.00418	ABL2,ACVR1B,CD3E,DDX3X,IGF2BP3,NLRP10,PTPN3,RNPEP,SERPINF1
	LMO2		transcription regulator		0.333		0.00428	ABL2,ACVR1B,CD3E,DDX3X,IGF2BP3,NLRP10,PTPN3,RNPEP,SERPINF1
	RICTOR		other		0.311		0.0134	HK2,PTGS2,RPL23,RPS18,RPS23,RPS8,TCIRG1,YAP1
	metformin		chemical drug		0.301		0.0105	ACTA2,PCK1,PTGS2,RUNX2,SERPINF1,TP63,VWF
	CHUK		kinase		0.297	bias	0.0023	Acp5,CCL21,CTSB,HK2,NAGLU,PTGS2,RCAN1,TP63	71 (9)
	uranyl nitrate		chemical toxicant		0.277		0.00667	ACADS,FTL,PDHA1,RPL23,RPS8
	IL22		cytokine		0.277		0.0182	ACTA2,CALML3,CALML5,PLA2G2F,PTGS2
	26s Proteasome		complex		0.277		0.025	CTSA,CTSB,CTSD,GAS5,PTGS2
	3-methyladenine		chemical toxicant		0.254		0.00193	ACTA2,PTGS2,RCAN1,RUNX2	80 (19)
	NFKBIA		transcription regulator		0.248		0.00053	CCL21,COL2A1,CTSB,DDX3X,GADD45A,GAS5,HK2,HLA-DQA1,NAGLU,PDHA1,PTGS2,RCAN1,RPS18,YAP1	86 (13)
	VEGFA		growth factor		0.237	bias	0.00617	ACTA2,ADAMTS1,CTSB,ETS2,NFATC1,PTGS2,RCAN1,RUNX2,SET	75 (17)
	ERBB2		kinase		0.223		0.00723	ACTA2,CBFA2T3,CTSB,DNAJB6,EHF,EPCAM,HOMER2,IRF6,KLF4,MYL9,NUP210,PDHA1,PDK4,PER1,POLR3GL,PTGS2,RAB18,TP63,VWF	76 (11)
	epinephrine		chemical - endogenous mammalian		0.218		0.0121	HK2,PER1,PTGS2,TRIM63
	MSTN		growth factor		0.162		0.00014	Acp5,ACTA2,FBXO32,NFATC1,RUNX2,TRIM63	62 (10)
	HDAC1		transcription regulator		0.152		0.00409	Acp5,COL2A1,FGFBP1,NASP,NCL,NFATC1,PCK1,PTGS2,RUNX2	71 (14)
	cadmium		chemical toxicant		0.152		0.0089	DLD,PTGS2,SERPINF1,SLC39A8
	EP300		transcription regulator		0.117	bias	0.0239	ACTA2,CKB,COL2A1,FOSL2,IRF6,PCK1,PDK4,PLEKHA1,PTGS2,RUNX2
	THRB		ligand-dependent nuclear receptor		0.063		0.00108	Acp5,CFD,CTSD,KLF9,PCK1,PDK4,PER1,PTGS2,RUNX2,TP63	84 (18)
	PPARG		ligand-dependent nuclear receptor		0.05		0.0105	ACADS,ACTA2,ADRB2,CFD,DLAT,HK2,KLF4,MYF6,PCK1,PDK4,PTGS2,RUNX2
	CEBPA		transcription regulator		0.011		1.07e-05	CFD,CIITA,DYNLT3,EEF1A2,Flg,GADD45A,IRF6,KLF4,MYF6,NFATC1,PCK1,PTGS2,PTPN3,RORA,RUNX2,SERPINF1,SLC10A1	60 (11)
	MAPK14		kinase		0.007		0.00165	ACTA2,FGFBP1,FOSL2,GADD45A,NFATC1,PCK1,PTGS2,RUNX2	80 (14)
	PML		transcription regulator		0		0.000464	ACADS,CIITA,DNAJB6,FTL,GADD45A,HMGCS1,PDK4,TXNRD1
	TAF4		transcription regulator		0		0.000619	ABL2,EHF,Flg,GAS5,KLF4,MAFK
	L-glutamic acid		chemical - endogenous mammalian		0		0.00409	ACTA2,CFD,HMGCS1,PER1,PTGS2,RUNX2	77 (19)
	methapyrilene		chemical drug		0		0.00409	ACADS,CTSB,GADD45A,RPS8,SLC10A1,TXNRD1
	5-fluorouracil		chemical drug		0		0.00479	ACVR1B,CTSD,GADD45A,NCL,PTGS2,RPL23,RPL5,RPS23,RPS8,YAP1
	CIP2A		other		0		0.006	GADD45A,HK2,NCL,PDK4
	IL5		cytokine		0	bias	0.014	CD5,CHST12,CIITA,FOSL2,GADD45A,PDE4B,SEMA4A,SLC39A8
	TGFBR1		kinase		0		0.0178	ACTA2,GJA4,KLF4,PDK4
	PIK3CG		kinase		0		0.0281	Acp5,CTSW,FOSL2,NFATC1
	vancomycin		biologic drug		0		0.0316	ACTA2,ADAMTS1,CTSB,GAS5,SET,SLC37A2
	AGN194204		chemical drug		0		0.0367	CD3E,CD5,GADD45A,GGCT,HK2,PDK4
	BMP4		growth factor		-0.005		0.000994	ACTA2,COL2A1,EIF4A2,EPCAM,HK2,KLF4,MAFK,RUNX2,TP63	9 (2)
	NFATC1	-0.406	transcription regulator		-0.021	bias	0.0384	Acp5,NFATC1,PTGS2,RCAN1
	geldanamycin		chemical drug		-0.073		0.0371	ACTA2,CIITA,CNOT7,DDX3X,HLA-DQA1,NASP,PTGS2
	CREBBP		transcription regulator		-0.106		0.029	CKB,COL2A1,FOSL2,HMGCS1,IRF6,PCK1,PLEKHA1,PTGS2,RUNX2
	lactacystin		chemical - protease inhibitor		-0.128		0.0219	ADRB2,CTSD,FTL,PTGS2,RUNX2,TXNRD1
	SMAD7		transcription regulator		-0.128		0.0269	ACTA2,ACVR1B,COL2A1,DEPTOR,GADD45A
	ESR1		ligand-dependent nuclear receptor		-0.137		0.000149	ACTA2,ACVR1B,ARRDC3,CARD14,CGN,CKB,CRK,CTSB,CTSD,DYNC1LI2,EPCAM,FOSL2,GLB1,HSPA2,Ifi202b,KIF13A,Krt10,MAP3K12,MAP7,NFATC1,NUP210,PCYOX1,PDK4,PTGS2,RDH10,RGS19,RUNX2,SLC10A1,SLC39A8,TCIRG1,TRIM16	100 (17)
	RPTOR		other		-0.14		0.00354	Acp5,HK2,HMGCS1,PCK1,PTGS2,RUNX2	68 (12)
	ADRB		group		-0.156		0.0193	GADD45A,HMGCS1,KLF4,NCL,PTGS2
	cyclic AMP		chemical - endogenous mammalian		-0.183		0.00287	ACTA2,EPCAM,FOSL2,NFATC1,PCK1,PDE4B,PER1,PTGS2,VWF	57 (15)
	FOS		transcription regulator		-0.186		0.0257	Acp5,CFD,CTSB,DDX3X,GAS5,HK2,HOOK1,Krt2,MAFK,NFATC1,PTGS2,RPS18
	PRKCA		kinase		-0.192		0.0117	CIITA,CTSB,IGF2BP3,PTGS2,RUNX2
	trichostatin A		chemical drug		-0.224		0.000854	ADAMTS1,CIITA,COL2A1,DDX3X,EIF4B,FOSL2,GADD45A,HMGCS1,IGF2BP3,KLF4,MYF6,NFATC1,NUCKS1,PTGS2,RGS19,RUNX2,SMYD2,SRSF6,TP63,VWF,YAP1	65 (12)
	TNFSF10		cytokine		-0.243		0.00166	ADRB2,CTSB,PER1,PTGS2,RCAN1,TP63	82 (17)
	PI3K (complex)		complex		-0.254	bias	0.00544	ADRB2,CTSD,FBXO32,HK2,NCL,NFATC1,PTGS2,RPL23,TP63	71 (17)
	PNPLA2		enzyme		-0.271		0.000741	ACADS,PCK1,PDK4,SUCLG2,TRIM63	59 (10)
	MAPK1		kinase		-0.311		0.00115	CTSB,CTSW,DEPTOR,EPCAM,FBXO32,FOSL2,IGF2BP3,LAD1,NFATC1,NUP210,PTGS2,TACC2	75 (10)
	NR1H4		ligand-dependent nuclear receptor		-0.342		0.0123	ACTA2,ADRB2,CTSB,KLF4,PCK1,PTGS2,SLC10A1
	isoproterenol		chemical drug		-0.345	bias	0.00292	ACTA2,ADRB2,FOSL2,PCK1,PTGS2,RAB18,VWF	91 (18)
	PD98059		chemical - kinase inhibitor		-0.351		0.0257	ACTA2,ARPP19,CTSB,DSG1,ERRFI1,FGFBP1,GADD45A,LAD1,PCK1,PER1,PTGS2,RUNX2
	D-glucose		chemical - endogenous mammalian		-0.372		0.0071	ACTA2,ART3,COL2A1,CTSB,FBXO32,GPLD1,HK2,MID1IP1,MYL9,PCK1,PTGS2,RDH10,RUNX2,SLC39A8,TRIM63,TXNRD1	84 (17)
	Rxr		group		-0.391		3.42e-05	CTSB,GADD45A,Neat1,PCK1,PDK4,PTGS2,SERPINF1,SLC10A1	44 (7)
	MRTFB		transcription regulator		-0.391		0.00274	ACTA2,ADAMTS1,GADD45A,MAFK,MYL9,PTGS2,TRAPPC1	33 (4)
	sphingosine-1-phosphate		chemical - endogenous mammalian		-0.409		0.0226	ACTA2,PTGS2,RUNX2,VWF
	GDF11		growth factor		-0.422		0.000815	Acp5,NFATC1,PTGS2,RUNX2
	calcitriol		chemical drug		-0.425		0.0102	Acp5,CFD,EHF,ERRFI1,FTL,GADD45A,HK2,KLF4,NASP,NFATC1,PDHA1,PDK4,PTGS2,TP63
	IRF2		transcription regulator		-0.435		0.00354	CIITA,DNAJB6,HK2,KLF4,PTGS2,TXNRD1
	let-7a-5p (and other miRNAs w/seed GAGGUAG)		mature microRNA		-0.44	bias	0.021	ACTA2,AKAP8,DSP,IGF2BP3,PTGS2,RDH10
	ELAVL1		other		-0.445		0.00367	ACTA2,CFD,HOMER2,HSPA2,NCL,PTGS2,RUNX2,TP63	51 (7)
	ciprofloxacin		chemical drug		-0.447		0.00719	CTSA,CTSD,IGF2BP3,MAN2B2,RPS18
	PKD1		ion channel		-0.447		0.00728	Acp5,MAP3K12,PCK1,PDE4B,RUNX2,VWF,YAP1	83 (11)
	GLI2		transcription regulator		-0.447		0.00832	CBFA2T3,HK2,IRF6,RCAN1,RUNX2
	cholecalciferol		chemical - endogenous mammalian		-0.447		0.0154	Acp5,HK2,PDK4,PLD4,RUNX2
	CPT1B		enzyme		-0.447		0.0293	CALML5,HK2,PCK1,PDK4,PPP1CB,TRIP10
	UCP1		transporter		-0.447		0.0331	FBXO32,GADD45A,GHITM,PCK1,SMYD2
	AKT1		kinase		-0.456		0.00166	ACTA2,FBXO32,HMGCS1,NFATC1,PCK1,PLA2G2F,PTGS2,SERPINF1,TP63,TRIM63	99 (20)
	TLR2		transmembrane receptor		-0.504		0.00559	ACTA2,FBXO32,GADD45A,HLA-DQA1,PTGS2,TRIM63,VWF	92 (18)
	PI3K (family)		group		-0.506		0.00774	ACTA2,CTSD,FBXO32,PTGS2,RDH10	80 (15)
	AHR		ligand-dependent nuclear receptor		-0.536		0.0038	ACTA2,CCL21,CD3E,CD8B,CTSD,GADD45A,GHITM,HK2,PCK1,PDE4B,PTGS2,SDR9C7	80 (16)
	CSF1		cytokine		-0.551		0.0252	Acp5,CTSD,ETS2,HK2,HMGCS1,NFATC1,SLC37A2
	FN1		enzyme		-0.57		0.0091	ACTA2,CTSD,DDX3X,EIF4B,IGF2BP3,LIN7C,RUNX2	54 (9)
	TP53		transcription regulator		-0.585		0.0211	ACADS,ACTA2,ADRB2,CHST12,CKB,COL2A1,CTSB,CTSD,CTSW,DDX3X,DLAT,DLD,FGFBP1,GADD45A,GLB1,HK2,HLA-DQA1,HMGCS1,KLF4,Krt10,MYL9,PCK1,PDE4B,PDHA1,PTGS2,RPL5,RPS18,RUNX2,SUCLG2,TACC2,TP63
	SPI1		transcription regulator		-0.603		0.0171	Acp5,ACTA2,CD3E,CIITA,ETS2,KLF4,PTGS2,SP6
	MRTFA		transcription regulator		-0.625		0.00101	ACTA2,CRK,DSG1,GADD45A,MAFK,MYL9,PTGS2,TRAPPC1	33 (4)
	FOXC2		transcription regulator		-0.651		0.000515	ACTA2,ADRB2,CFD,PTGS2,RUNX2	49 (7)
	IRS1		enzyme		-0.651		0.0158	FBXO32,GAS5,KLF4,PCK1,TRIM63
	SB203580		chemical drug		-0.654	bias	0.00092	Acp5,ACTA2,ADRB2,CIITA,EHF,ETS2,GADD45A,HK2,PCK1,PDE4B,PTGS2,RUNX2,TP63,YAP1	74 (16)
	Akt		group		-0.656		0.00349	ACTA2,COL2A1,CTSD,FBXO32,HK2,NFATC1,PCK1,PDK4,PTGS2,RDH10,RUNX2	68 (17)
	obeticholic acid		chemical drug		-0.686		0.00165	ACTA2,PCK1,PTGS2,SLC10A1	81 (14)
	KLF3		transcription regulator		-0.707		0.0427	ELMO1,HYPK,IGF2BP3,MAGED1,PCYOX1,SGCB,TRAPPC1,TRIP10
	Immunoglobulin		complex		-0.726		0.00208	ACTA2,CFD,CIITA,CTSA,DLAT,DLD,DSP,ETS2,HK2,KLF4,NFATC1,PCK1,PDHA1,PDK4,PLA2G2F,PTGS2,RUNX2,SUCLG2,TXNRD1	93 (17)
	GCG		other		-0.737		0.00208	ACADS,ELMO1,FOSL2,PCK1,PDHA1	28 (5)
	HDAC2		transcription regulator		-0.762		0.00801	ACTA2,COL2A1,NASP,NFATC1,PTGS2,TP63	45 (9)
	arsenic trioxide		chemical drug		-0.801		0.011	DNAJB6,HMGCS1,HSPA2,NCL,PTGS2,RAB18,TCIRG1,TP63,TXNRD1
	IGF1R		transmembrane receptor		-0.816		0.00568	ACADS,ACTA2,ADRB2,CD300C,CTSD,IVNS1ABP,PTGS2,RAB18,RUNX2	91 (15)
	PLCG2		enzyme		-0.849		0.00149	CTSD,DGKZ,HLA-DQA1,NFATC1,PTGS2
	dorsomorphin		chemical - kinase inhibitor		-0.849		0.00569	ACTA2,COL2A1,PCK1,SERPINF1	66 (11)
	RAC1		enzyme		-0.885	bias	0.0394	ACTA2,CIITA,COL2A1,PTGS2
	tazemetostat		chemical drug		-0.905		0.000517	ADAMTS1,DDX3X,EIF4B,IGF2BP3,KLF4,NFATC1,NUCKS1,RGS19,SMYD2,SRSF6,YAP1
	SP2509		chemical reagent		-0.905		0.000608	ADAMTS1,DDX3X,EIF4B,IGF2BP3,KLF4,NFATC1,NUCKS1,RGS19,SMYD2,SRSF6,YAP1
	U0126		chemical drug		-0.971		0.0415	ACTA2,CIITA,COL2A1,EHF,EPCAM,ERRFI1,HLA-DQA1,NFATC1,PER1,PTGS2,RUNX2
	torin1		chemical reagent		-1	bias	1.04e-06	DLAT,EIF4B,HK2,PDHA1,PTGS2,RPL23,RPL5,RPS18,RPS23,RPS8,RUNX2,TCIRG1
	GATA1		transcription regulator		-1		0.000391	CBFA2T3,CIITA,ETS2,MAGED1,NCL,RANGRF,RUNX2,SP6,UAP1,VWF,ZNF366
	ARID1A		transcription regulator		-1		0.00464	ACTA2,EPCAM,FGFBP1,KLF4,TP63
	CLPP		peptidase		-1	bias	0.00539	ACADS,DLAT,DLD,PDHA1
	pexidartinib		chemical drug		-1		0.0226	CD300C,DSP,EEF1A2,ERRFI1
	SNAI2		transcription regulator		-1.033		8.64e-05	COL2A1,DSP,EPCAM,RUNX2,TP63,YAP1
	MMP9		peptidase		-1.067		0.00167	Acp5,ACTA2,CTSB,GADD45A,NFATC1	85 (14)
	NOTCH1		transcription regulator		-1.067		0.00273	ACTA2,CFD,DLD,EPHA4,Flg,GAA,PTGS2,RUNX2,TP63	75 (15)
	GSTO1		enzyme		-1.067		0.00539	CHAC1,CTSD,DYNLT3,PDE4B
	ascorbic acid		chemical - endogenous mammalian		-1.067		0.0226	ACTA2,FTL,PTGS2,RUNX2
	CDKN1A		kinase		-1.069		0.00958	ACTA2,CTSB,Flg,GADD45A,GLB1,Krt10,TP63,YTHDC1
	8-bromo-cAMP		chemical reagent		-1.079	bias	0.0121	ADRB2,CFD,CKB,CTSB,CTSD,GAA,GLB1,NAGLU,PCK1,PDE4B,PPP1CB,PTGS2
	bleomycin		biologic drug		-1.114	bias	0.0259	ACTA2,CHAC1,CTSD,PLA2G15,TP63,VWF
	AS1842856		chemical reagent		-1.131	bias	0.000223	COL2A1,FBXO32,PTGS2,TRIM63
	MKNK1		kinase		-1.134	bias	0.00331	GGCT,HSPA2,Neat1,NUP210,PDK4,SFR1,Spaca6
	let-7		microRNA		-1.145	bias	0.0438	ACTA2,HK2,PTGS2,RCAN1,RDH10,YAP1
	BCL2		transporter		-1.154		0.0299	CD5,COL2A1,DLAT,GADD45A
	SP1		transcription regulator		-1.166	bias	0.00459	ACTA2,ADAMTS1,CIITA,CKB,COL2A1,CTSD,HK2,KLF4,PCK1,PTGS2,RUNX2,SLC39A8,TXNRD1,VWF	53 (10)
	BMP2		growth factor		-1.177		0.0112	ACTA2,COL2A1,KLF4,KLF9,NFATC1,PTGS2,RUNX2
	AZGP1		transporter		-1.214		0.000165	DSP,FBXO32,HK2,TRIM63
	NR4A1		ligand-dependent nuclear receptor		-1.238		0.000319	ACTA2,DLAT,DLD,EHF,EPCAM,HK2,PCK1,PDHA1,PDK4,SLC37A2,SUCLG2	68 (11)
	ESRRG		ligand-dependent nuclear receptor		-1.277		3.17e-07	DLAT,DLD,FBXO32,HK2,PCK1,PDHA1,PDK4,SUCLG2,TRIM63	60 (7)
	TCF12		transcription regulator		-1.308		0.0182	CBFA2T3,CD3E,EPCAM,RORA,SEMA4A
	GLI1		transcription regulator		-1.32		0.0325	ACTA2,COL2A1,CTSB,KLF4,KLF9,PDK4,PTGS2,RUNX2,SOX18,TRIP10,UACA
	TFRC		transporter		-1.342	bias	0.000413	ACTA2,CHAC1,FTL,GADD45A,HK2,PLD4
	CDK19		kinase		-1.342	bias	0.00214	ACVR1B,CTSD,EPCAM,GADD45A,HMGCS1,KLF4
	GABA		chemical - endogenous mammalian		-1.387	bias	0.000832	ACVR1B,DLAT,EEF1A2,EIF4A2,GAA,GLB1,MAGED1,NOP58,PTGS2,RPL5,RPS18,RPS8,UBE2Q2
	ACOX1		enzyme		-1.387		0.0209	ADAMTS1,ETS2,GADD45A,HLA-DQA1,PDK4
	miR-199a-5p (and other miRNAs w/seed CCAGUGU)		mature microRNA		-1.4	bias	0.00132	KLF4,LIN7C,MYL9,PTGS2,SET
	PTGER4		G-protein coupled receptor		-1.406		0.0282	ACTA2,ARRDC3,Fnbp1l,PTGS2,RUNX2
	epicatechin		chemical drug		-1.41		0.00426	NFATC1,PARVG,PCK1,PLA2G15,PTGS2	50 (7)
	SOX9		transcription regulator		-1.414		0.00719	ADAMTS1,COL2A1,FGFBP1,NFATC1,RUNX2	50 (7)
	TCF3		transcription regulator		-1.437		0.0021	CBFA2T3,CD3E,CD5,CD8B,EPCAM,ETS2,FGD2,GADD45A,GPLD1,KLF4,RORA,SEMA4A	16 (2)
	oleic acid		chemical - endogenous mammalian		-1.543		0.00317	ANKRD23,GADD45A,HK2,PCK1,PDK4,PTGS2	80 (14)
	PRL		cytokine		-1.611		0.0354	CTSA,CTSB,CTSD,MAGED1,PDK4,SLC10A1,TP63
	PPARGC1A		transcription regulator		-1.617		0.000391	ADAMTS1,COL2A1,CTSA,DLAT,ELMO1,FBXO32,HK2,PCK1,PDHA1,PDK4,PTGS2,RUNX2,TRIM63,YAP1	97 (15)
	PPARGC1B		transcription regulator		-1.698	bias	1.28e-05	CKB,FBXO32,HK2,PCK1,PDK4,RUNX2,TRIM63	71 (12)
	SNAI1		transcription regulator		-1.72		0.00778	CGN,COL2A1,EPCAM,PTGS2,RUNX2,TP63	63 (13)
	imatinib		chemical drug		-1.732		0.0308	DNAJB6,EIF4B,GADD45A,HSPA2,NCL,RAB18,SRSF6,TCIRG1
	CST5		other		-1.89		0.0315	CHD2,CTSB,DSP,MYL9,NCL,RUNX2,VPS25
	miR-141-3p (and other miRNAs w/seed AACACUG)		mature microRNA		-1.974	bias	0.0089	EPCAM,GADD45A,IRF6,YAP1
	FASN		enzyme		-1.982		0.00666	ACTA2,CFD,PCK1,PTGS2	91 (15)
	HDL-cholesterol		complex	Inhibited	-2		0.000815	CHAC1,DEPTOR,FOSL2,HMGCS1
	glutamine		chemical - endogenous mammalian	Inhibited	-2		0.00667	ACTA2,GADD45A,KLF4,PCK1,PTGS2	69 (16)
	sirolimus		chemical drug	Inhibited	-2.137		0.0335	Acp5,ACTA2,CFD,HK2,NCL,PDHA1,RPL23,RPL5,RPS18,RPS23,RPS8,RUNX2
	TFEB		transcription regulator	Inhibited	-2.204	bias	0.000318	Acp5,CTSA,CTSB,CTSD,NAGLU
	mir-8		microRNA	Inhibited	-2.216	bias	0.00124	ABL2,ACTA2,ADAMTS1,CRK,EPCAM,ERRFI1,KLF4,YAP1
	Cdc42		enzyme	Inhibited	-2.219		9.77e-05	ACTA2,COL2A1,CTSA,CTSB,CTSD	48 (7)
	OGA		enzyme	Inhibited	-2.309		0.00227	ADAP1,EPHA4,FGFBP1,GAA,GADD45A,HMGCS1,IGF2BP3,IP6K3,PDHA1,PLD4,SMTNL1,SUCLG2
	LARP1		translation regulator	Inhibited	-2.449	bias	0.000302	EIF4B,RPL23,RPL5,RPS18,RPS23,RPS8
	LY294002		chemical drug	Inhibited	-2.521	bias	0.0344	ACTA2,ADAMTS1,ADRB2,ART3,ETS2,HK2,HMGCS1,PDE4B,PTGS2,RUNX2,TP63
	SNCA		enzyme	Inhibited	-2.985		0.0251	CHAC1,CIITA,CTSB,FBXO32,GADD45A,HLA-DQA1,HOMER2,IVNS1ABP,KLF4
	genistein		chemical drug	Inhibited	-3.021		0.000523	CFD,CHST12,CTSA,CTSB,CTSD,GLB1,HLA-DQA1,NAGLU,PER1,PLA2G15,PTGS2,RUNX2,SIGLEC10	95 (12)

## Sheet: d +z score cytokine USRs
USRs in c filtered for +positive z score and Cytokine	Upstream Regulator	Expr Log Ratio	Molecule Type	Predicted Activation State	Activation z-score	Flags	p-value of overlap	Target Molecules in Dataset	Mechanistic Network
	TNF		cytokine	Activated	3.192		5.95e-06	ACADS,Acp5,ACTA2,ADRB2,ARRDC3,CCL21,CD3E,CD5,CFD,CIITA,COL2A1,CTSB,DEPTOR,EHF,EPCAM,ETS2,FBXO32,FOSL2,GADD45A,GAS5,HK2,KLF4,LAD1,LTB4R2,NAGLU,NFATC1,PCK1,PDE4B,PLVAP,PTGS2,RCAN1,RORA,RUNX2,SERPINF1,SLC10A1,SLC39A8,THAP12,TP63,TRIM63,TXNRD1,UACA,YAP1,ZNF330	93 (17)
	IL1B		cytokine	Activated	2.544		0.00645	ACTA2,ADAMTS1,ADRB2,CIITA,COL2A1,CTSB,EHF,ERRFI1,ETS2,GADD45A,GAS5,HK2,IGF2BP3,PDE4B,PDHA1,PTGS2,RCAN1,RORA,RUNX2,SLC10A1,UAP1	90 (17)
	IL3		cytokine	Activated	2	bias	0.0337	FOSL2,GADD45A,HK2,HSPA2,KLF9,NCL,NFATC1,RPL5
	IL2		cytokine		1.319		0.0484	ACVR1B,CD5,CD8B,CTSW,EPHA4,GPLD1,HK2,HLA-DQA1,HMGCS1,PDE4B,PTGS2,PTPN3,RASGEF1B
	SPP1		cytokine		1.23		0.00112	Acp5,DSP,ETS2,HOMER2,PNN,PTGS2,RUNX2,SERPINF1	75 (13)
	IL17A		cytokine		1.079		0.0433	ACTA2,COL2A1,GADD45A,NFATC1,PTGS2,TP63,VWF
	IL6		cytokine		0.945		0.00667	Acp5,ACTA2,ADAMTS1,CFD,CIITA,COL2A1,EPHA4,ERRFI1,ETS2,GADD45A,HLA-DQA1,Ifi202b,PTGS2,RORA,RUNX2,SEMA4A,SLC10A1	72 (14)
	IL10		cytokine		0.742		0.0317	ACTA2,CIITA,CTSA,CTSB,CTSD,EHF,ETS2,NFATC1,PDE4B,PTGS2
	IL4		cytokine		0.675		0.005	Acp5,ACTA2,ADAP1,CD5,CD8B,CIITA,CKB,CYB561A3,DSG1,Flg,GPLD1,HK2,HLA-DQA1,HOMER2,NCL,NFATC1,PDE4B,PTGS2,RASGEF1B,RNPEP,SEMA4A,SLC66A1,YAP1	64 (10)
	IL13		cytokine		0.539		0.0232	Acp5,CD3E,CTSB,DYNLT3,FGD2,HOMER2,NFATC1,PTGS2,SERPINF1,YAP1
	WNT5A		cytokine		0.503		0.0196	COL2A1,DGKZ,IGF2BP3,PTGS2,RUNX2,YAP1
	CSF3		cytokine		0.447		0.0445	CD300LD,CTSD,GADD45A,HLA-DQA1,NFATC1
	IFNG		cytokine		0.351		0.0273	ACTA2,ARPP19,CHAC1,CIITA,CTSB,CTSD,EHF,ETS2,FTL,GAS5,HK2,HLA-DQA1,HMGCS1,Ifi202b,KLF4,Lce1l,PARVG,PCK1,PDHA1,PTGS2,RUNX2,SEMA4A,TCIRG1,TP63,YAP1
	IL22		cytokine		0.277		0.0182	ACTA2,CALML3,CALML5,PLA2G2F,PTGS2
