# Supplementary material for: Widespread discrepancy in Nnt genotypes and genetic backgrounds complicates granzyme A and other knockout mouse studies
Source: eLife. 2022 Feb 4;11:e70207. doi: 10.7554/eLife.70207 (PMC8816380; doi:10.7554/eLife.70207)
Supplement: Supplementary file 5. — Datasets for RNA-Seq and Ingenuity Pathway Analysis (IPA) of mice feet day 6 post infection; 6J + MitoTEMPO + CHIKV vs. 6J + PBS + CHIKV. [file elife-70207-supp5.xlsx]

## Sheet: a All genes6JMito+CHIKvs6J+CHIK
RNA-Seq of mice feet (day 6 post infection) after treatment with MitoTEMPO; 6J+MitoTEMPO+CHIKV vs 6J+PBS+CHIKV, all genes	ensembl_ID	GeneID	logFC	logCPM	F	PValue	FDR	6JMito	6JMito	6JMito	6JMito	6JMito	6JMito	6J	6J	6J	6J	6J	6J
	ENSMUSG00000000001.5	Gnai3	0.0392536	7.359	0.22435	0.637935	0.931721	1132	1506	1331	1307	1435	1232	1392	1210	229	1175	1408	1365
	ENSMUSG00000000028.16	Cdc45	-0.032977	3.0237	0.0415691	0.839322	1	54	69	53	41	48	61	43	62	12	48	71	52
	ENSMUSG00000000031.17	H19	0.466928	5.11192	3.5865	0.073109	0.548931	198	247	123	315	198	156	155	145	26	130	164	160
	ENSMUSG00000000037.18	Scml2	0.0275068	2.36876	0.0214786	0.929618	1	38	41	38	36	54	31	43	31	5	44	40	41
	ENSMUSG00000000049.12	Apoh	1.79207	-1.3215	3.51476	0.0705172	0.548931	1	1	0	2	1	1	0	0	0	0	0	1
	ENSMUSG00000000056.8	Narf	-0.00466019	5.07038	0.0014933	0.969338	1	199	315	186	301	242	167	263	232	42	231	201	250
	ENSMUSG00000000058.7	Cav2	-0.156815	5.44497	0.45303	0.508818	0.868498	271	527	402	368	344	239	424	423	67	381	378	393
	ENSMUSG00000000078.8	Klf6	-0.152692	8.54478	1.85581	0.179641	0.662338	1724	2451	2255	1379	2542	1927	2472	2234	441	1834	2385	2419
	ENSMUSG00000000085.17	Scmh1	-0.0469317	4.62205	0.150283	0.700013	0.957654	158	246	177	194	190	131	187	180	33	178	192	207
	ENSMUSG00000000088.8	Cox5a	0.0412869	5.42749	0.15073	0.699589	0.957606	263.96	370.97	272.98	293.99	358.98	302.96	309.98	287	48.98	277.95	324.95	340.95
	ENSMUSG00000000093.7	Tbx2	0.769851	2.91778	16.207	0.000205056	0.0300818	50	56	40	78	45	39	42	29	3	29	30	26
	ENSMUSG00000000094.13	Tbx4	0.0856858	2.64335	0.185651	0.668527	0.940616	41	50	32	38	29	19	28	40	6	31	33	31
	ENSMUSG00000000120.7	Ngfr	-0.0949887	3.12484	0.263302	0.61026	0.927839	50	85	52	78	54	40	52	87	14	54	55	64
	ENSMUSG00000000125.6	Wnt3	0.020669	3.59387	0.0170834	0.896567	1	85	118	117	132	120	109	116	143	20	98	106	103
	ENSMUSG00000000126.12	Wnt9a	0.405531	2.5097	3.33441	0.0741905	0.548931	36	39	28	45	27	20	32	23	6	27	19	19
	ENSMUSG00000000127.16	Fer	-0.0815873	5.01867	0.506157	0.480318	0.850065	223	329	235	213	269	166	255	240	52	223	239	282
	ENSMUSG00000000131.16	Xpo6	-0.0823085	7.17317	0.887505	0.350964	0.755145	796	1135	960	784	1060	806	983	967	205	820	965	1061
	ENSMUSG00000000134.18	Tfe3	-0.19935	6.20707	4.00351	0.0511902	0.49841	356	602	509	402	439	370	548	540	97	394	550	526
	ENSMUSG00000000142.16	Axin2	0.175141	5.09542	2.54377	0.117422	0.607655	256	296	271	276	290	222	280	231	48	243	209	218
	ENSMUSG00000000148.18	Brat1	0.0836984	4.49614	0.410453	0.524846	0.877963	151	153	140	118	177	141	156	109	27	132	156	142
	ENSMUSG00000000149.11	Gna12	-0.110622	6.06446	1.16464	0.286003	0.68815	350.64	489.34	371.73	364.76	430.74	352.53	472.4	427.38	69.35	338.72	437.61	495.67
	ENSMUSG00000000154.17	Slc22a18	0.133223	1.31817	0.223083	0.638883	0.931721	14	14	16	22	19	17	12	23	2	9	16	20
	ENSMUSG00000000157.17	Itgb2l	0.178251	0.59262	0.0634028	0.803228	1	12	2	4	4	3	0	2	9	1	4	1	2
	ENSMUSG00000000159.17	Igsf5	-1.34081	-1.21662	2.25541	0.139827	0.649321	0	0	0	0	0	3	2	1	0	1	1	3
	ENSMUSG00000000167.15	Pih1d2	0.275908	0.308701	0.327382	0.570314	0.903652	10	7	6	1	11	11	3	0	3	10	5	11
	ENSMUSG00000000168.11	Dlat	0.119006	5.58489	0.848292	0.362467	0.765032	326	354	267	310	293	278	302	276	48	246	307	301
	ENSMUSG00000000171.6	Sdhd	-0.112861	5.20876	0.954332	0.333612	0.739567	203	313	227	207	262	174	268	252	46	194	282	250
	ENSMUSG00000000182.10	Fgf23	0.96552	-0.450104	1.75063	0.192188	0.662338	1	4	1	1	1	4	3	0	0	1	1	0
	ENSMUSG00000000183.7	Fgf6	0.231594	0.682056	0.329031	0.568961	0.903175	10	14	8	9	8	6	10	11	0	5	3	12
	ENSMUSG00000000184.13	Ccnd2	0.0780208	8.72501	0.845399	0.362545	0.765101	2497	3139	2711	2479.57	2820.88	2140	2801.88	2503	448.33	2234.97	2359.96	2696
	ENSMUSG00000000194.14	Gpr107	0.00361354	6.53523	0.00152371	0.969028	1	566	799.67	629	561.94	715	504.51	667	630.43	104	596.49	642.41	643.35
	ENSMUSG00000000197.9	Nalcn	-0.049113	0.721526	0.0199618	0.888247	1	8	8	6	14	5	6	10	7	2	10	8	5
	ENSMUSG00000000202.10	Btbd17	-1.06325	-0.753423	2.02316	0.161508	0.662338	1	0	2	1	0	1	2	2	0	3	1	2
	ENSMUSG00000000204.17	Slfn4	-0.0934299	9.25556	0.169354	0.685212	0.949905	2906.93	3896.87	4623.91	1079.97	3924.94	2700.99	3818.88	2976.9	691.98	2009.9	4517.88	3546.43
	ENSMUSG00000000214.12	Th	1.14397	-1.62408	1.52844	0.264342	0.662338	0	0	0	1	0	0	0	0	0	0	0	0
	ENSMUSG00000000216.9	Scnn1g	0.101795	1.4525	0.182521	0.695378	0.955174	25	19	26	32	32	33	24	28	4	23	36	23
	ENSMUSG00000000223.14	Drp2	0.268685	5.14606	6.27551	0.0157598	0.312376	222	232	178	172	236	167	181	142	31	142	187	188
	ENSMUSG00000000244.18	Tspan32	-0.751565	2.54399	13.7852	0.000541883	0.0520106	28	37	25	22	26.64	14	34	31	6	44	51	57
	ENSMUSG00000000247.12	Lhx2	0.254642	3.04392	2.0551	0.158306	0.662338	56	58	68	56	76	44	60	60	8	29	60	46
	ENSMUSG00000000248.17	Clec2g	0.216545	3.39574	1.14336	0.293376	0.695324	87	125	169	143	130	128	138	93	17	101	128	121
	ENSMUSG00000000253.14	Gmpr	0.442156	2.58064	3.10594	0.0863098	0.565763	54.93	33	23	60	51	27	38	22.03	4	39	21.59	36
	ENSMUSG00000000263.16	Glra1	-1.26504	-1.39789	1.62251	0.215017	0.662338	0	0	0	0	0	0	0	0	0	1	0	0
	ENSMUSG00000000266.12	Mid2	-0.107393	5.41055	0.792606	0.37784	0.773462	305	520	393	421	386	300	446	428	75	410	394	406
	ENSMUSG00000000275.17	Trim25	0.0235684	7.49238	0.0573399	0.81179	1	1084	1320	1304	838	1278	1063	1198	1102	226	815	1274	1258
	ENSMUSG00000000276.12	Dgke	-0.0723336	4.32658	0.278787	0.599978	0.920937	147	167	161	133	144	138	165	186	37	149	99	162
	ENSMUSG00000000278.11	Scpep1	-0.264961	6.41109	8.27414	0.00602457	0.192492	445	706	596	443	617	428	643	648	137	503	673	697
	ENSMUSG00000000282.13	Mnt	-0.0223597	5.79097	0.0440886	0.834595	1	308	387	290	312	378	234	391	335	51	257	285	382
	ENSMUSG00000000290.14	Itgb2	-0.697604	7.76157	25.3348	2.40208e-05	0.0082371	803	1478	1138	481	1217	720	1599	1472	308	1072	1669	1915
	ENSMUSG00000000295.14	Hddc2	0.303853	2.52884	2.52819	0.118522	0.609864	37	58	37	39	61	45	46	45	6	36	32	29
	ENSMUSG00000000296.9	Tpd52l1	0.386323	1.7125	1.81408	0.184791	0.662338	21	35	18	36	28	17	23	17	1	18	17	28
	ENSMUSG00000000301.17	Pemt	0.511052	0.254043	1.37313	0.247172	0.662338	7	9	7	7	4	6	8	3	1	7	1	4
	ENSMUSG00000000303.13	Cdh1	-0.124686	7.25332	1.69402	0.199406	0.662338	1103	1675	1534	1605	1439	1238	1667	1603	303	1470	1635	1409
	ENSMUSG00000000305.13	Cdh4	0.100393	1.90699	0.14165	0.708338	0.962935	23	42	34	24	33	2	26	19	6	27	24	21
	ENSMUSG00000000308.15	Ckmt1	0.164711	5.82038	1.85591	0.180057	0.662338	455	564	414	513	514	495	471	448	88	421	439	413
	ENSMUSG00000000317.12	Bcl6b	-0.115939	2.96907	0.449559	0.50582	0.866453	37	58	55	32	42	47	55	51	4	41	58	52
	ENSMUSG00000000318.17	Clec10a	0.0133257	4.20813	0.00789355	0.929581	1	108.87	97.83	102	108.78	118.84	71.7	118.33	90.85	23	82	96.89	107.93
	ENSMUSG00000000320.11	Alox12	0.0872834	4.0917	0.397529	0.531417	0.883035	182	199	192	173	140	129	180	147	32	162	167	137
	ENSMUSG00000000326.14	Comt	-0.0926008	5.26137	0.650813	0.423879	0.81343	228.1	392	302.73	292.97	279.39	180	326	300.71	50.81	271.58	288	303.89
	ENSMUSG00000000339.15	Rtca	-0.06714	4.07652	0.242132	0.624958	0.931721	93	119	95	87	110	68	91	92	24	90	110	101
	ENSMUSG00000000340.11	Dbt	0.123222	4.23029	0.945583	0.335816	0.741323	105	193	143	137	164	114	132	139	17	114	129	157
	ENSMUSG00000000346.10	Dazap2	-0.295822	7.26307	2.86221	0.105371	0.599682	657.56	1482.74	1136.43	907.49	1100.11	609.76	1333.94	1176.82	219.85	1057.45	1148.45	1220.32
	ENSMUSG00000000355.14	Mcts1	-0.0509672	3.62333	0.123798	0.726521	0.972972	88	127	105	101	98	65	109	81	24	84	106	110
	ENSMUSG00000000359.4	Rem1	-0.165824	1.66326	0.450259	0.505491	0.866233	20	26	20	15	13	10	25	15	2	17	29	14
	ENSMUSG00000000365.10	Rnf17	0.420914	-0.459933	0.585394	0.448025	0.834005	1	7	5	3	3	2	1	4	1	2	3	2
	ENSMUSG00000000374.9	Trappc10	0.039578	6.75828	0.219521	0.641567	0.931721	721	941	750	718	899	652	814	783	135	685	736	808
	ENSMUSG00000000378.16	Ccm2	-0.0954246	4.61465	0.70107	0.406655	0.797215	137	170	135	119	153	129	168	140	30	128	149	164
	ENSMUSG00000000381.11	Wap	-2.35586	-1.4511	5.22081	0.0317496	0.411925	0	0	0	0	0	0	1	0	0	0	1	1
	ENSMUSG00000000384.16	Tbrg4	0.020235	4.98822	0.0281476	0.867481	1	203	247	167	194	239	196	218	181	34	181.04	218	245
	ENSMUSG00000000385.9	Tmprss2	0.444498	2.04294	4.04967	0.0499207	0.4964	33	57	41	28	25	20	30	31	3	14	25	27
	ENSMUSG00000000386.17	Mx1	0.167445	7.32736	0.85353	0.366195	0.767779	704.61	997.55	1318.4	428.42	1245.2	833.82	951.87	790.6	155	588.74	962.68	830.66
	ENSMUSG00000000392.18	Fap	0.307787	3.99109	4.37155	0.0419678	0.461632	119	131	114	135	105	102	101	102	13	113	84	88
	ENSMUSG00000000394.16	Gcg	0.515705	-1.5068	0.249403	0.646778	0.931721	0	0	1	0	1	0	1	0	0	0	0	0
	ENSMUSG00000000399.11	Ndufa9	0.273262	5.39875	5.45375	0.0238392	0.374738	256	363	228	297	311	263	256	219	50	222	252	218
	ENSMUSG00000000402.3	Egfl6	0.54755	0.590553	2.14705	0.149491	0.662338	5	8	7	14	11	7	4	9	0	5	7	6
	ENSMUSG00000000409.15	Lck	-0.529116	3.96891	6.9123	0.0136632	0.293404	67	136	69	22	94	83	123	98	28	80	111	132
	ENSMUSG00000000411.8	Tssk3	-0.00355896	-0.748478	4.32583e-06	0.998349	1	3	2	1	1	3	1	2	1	2	2	2	0
	ENSMUSG00000000416.17	Cttnbp2	-0.00175642	4.60111	0.000224914	0.988098	1	196.73	307.99	247.45	304.16	279.18	181.54	286.46	253.92	52.3	246.27	240.66	214.99
	ENSMUSG00000000420.16	Galnt1	-0.0501765	6.62507	0.261831	0.611257	0.928221	528	929	685.47	657	693	499	748	620	128	632.19	710	709.23
	ENSMUSG00000000435.2	Myf5	-0.704315	-0.420898	1.25655	0.26799	0.666601	1	4	1	0	2	1	2	3	0	4	2	2
	ENSMUSG00000000439.10	Mkrn2	-0.106441	5.49561	0.996025	0.323376	0.729201	251.31	428.34	272.36	290.41	345.79	228.63	368.42	305.98	42.09	332.05	320.41	349.47
	ENSMUSG00000000440.13	Pparg	-0.241513	4.17432	3.50807	0.0672874	0.544757	117	144	91	96	105	77	113	123	21	106	126	157
	ENSMUSG00000000441.18	Raf1	-0.0854518	6.65926	0.94622	0.335655	0.741294	573.99	787.72	719.76	685.69	799.07	574.8	785.64	789.93	116.63	614.97	794.23	776.77
	ENSMUSG00000000486.14	Septin1	-0.471528	3.72174	4.97018	0.0331353	0.417407	53	82	38	40	60	37	69	67	15	60	71	84
	ENSMUSG00000000489.8	Pdgfb	0.010765	4.7166	0.0082775	0.927894	1	167	222	163	158	186	144	186	164	33	179	169	156
	ENSMUSG00000000530.17	Acvrl1	-0.268772	5.54618	5.10344	0.0285496	0.399491	222	314	263	152	278	210	272	233	70	225	326	336
	ENSMUSG00000000531.6	Tamalin	0.138485	2.71521	0.384264	0.538319	0.885907	43	29	32	24	45	41	35	31	6	34	43	21
	ENSMUSG00000000532.12	Acvr1b	0.124421	6.47398	1.28059	0.263521	0.662338	584	810	657	638	702	510	662	521	120	587	607	563
	ENSMUSG00000000538.19	Tom1l2	0.175111	6.69295	3.88253	0.054688	0.502499	811.95	1047.87	831	928.51	919.15	671.34	879.99	796	115.58	777.69	743.97	762.04
	ENSMUSG00000000544.15	Gpa33	-1.21011	-1.15723	1.66011	0.203885	0.662338	1	2	0	0	0	0	2	0	0	0	4	1
	ENSMUSG00000000552.11	Zfp385a	-0.105308	5.41661	0.763283	0.386738	0.780432	251	398	366	355	366	261	390	359	74	361	321	326
	ENSMUSG00000000555.9	Itga5	-0.110265	7.36726	0.788014	0.380687	0.775222	876	1219	1082	568	1017	824	1007	960	204	709	1224	1074
	ENSMUSG00000000560.10	Gabra2	1.75764	-1.53596	3.02855	0.114445	0.599682	0	1	1	0	0	0	0	0	0	0	0	0
	ENSMUSG00000000561.15	Wdr77	0.293393	5.51463	7.65923	0.00804946	0.22543	353.4	356.34	310.39	326.16	395.46	377.24	294.32	290.92	64.32	222.24	325.24	299.01
	ENSMUSG00000000562.6	Adora3	0.0760257	3.09755	0.179599	0.673648	0.943717	53.91	74	67.63	34	79	53	69	60	11	44	58	54
	ENSMUSG00000000563.18	Atp5pb	0.0399405	6.44984	0.215448	0.64467	0.931721	567.25	782.93	552.43	594.44	701.7	598.58	625.33	555.54	110.6	554.89	709.81	663.01
	ENSMUSG00000000567.6	Sox9	-0.03913	4.69083	0.112504	0.738802	0.980446	178	249	202	192	184	143	183	214	34	201	204	183
	ENSMUSG00000000568.16	Hnrnpd	-0.0825566	6.43114	0.490065	0.487719	0.854532	471.82	716.94	540.85	477	651.74	446.87	591.83	533.79	106	512.94	632.96	644.95
	ENSMUSG00000000579.15	Dynlt1c	-0.422942	3.25422	5.4837	0.0234771	0.371635	48.79	88.17	47.58	27.74	55.1	37.61	67.38	64.92	18.23	52.01	79.1	60.16
	ENSMUSG00000000581.9	C1d	0.0327738	4.3452	0.0672629	0.796495	1	135	193	130	107	187	109	130	135	24	118	141	178
	ENSMUSG00000000594.8	Gm2a	-0.414696	6.56613	15.1206	0.000315315	0.0380872	410	784	626	488	640	363	779	674	150	592	778	758
	ENSMUSG00000000600.16	Krit1	-0.139317	6.03121	1.41737	0.239908	0.662338	417	617	491	364	517	320	544	437	78	439	533	593
	ENSMUSG00000000605.10	Clcn4	-0.0499408	6.08704	0.260509	0.612155	0.928572	442.67	605.66	481.73	493.01	484.17	409.64	526.75	431.57	104.76	440.68	518.87	567.52
	ENSMUSG00000000617.15	Grm6	-0.160594	-1.4237	0.023244	0.88419	1	0	1	0	0	1	0	0	0	0	0	1	1
	ENSMUSG00000000627.16	Sema4f	0.445007	1.92036	2.31469	0.134931	0.640337	29	27	15	8	29	16	8	18	3	12	26	11
	ENSMUSG00000000628.11	Hk2	0.250396	7.10574	6.90218	0.0115835	0.274106	957	1133	802	862	969	898	901	765	143	651	949	732
	ENSMUSG00000000631.21	Myo18a	0.218666	8.04151	4.00653	0.0511059	0.49841	2122	2129	1622	2089	1801	1988	1896	1748	334	1526	1671	1638
	ENSMUSG00000000632.14	Sez6	0.606825	-1.45134	0.402734	0.529116	0.880925	0	1	2	0	1	0	0	0	0	1	0	1
	ENSMUSG00000000673.10	Haao	-0.323196	2.00958	1.77273	0.189456	0.662338	10	29	23	27	20	21	23	30	3	18	40	29
	ENSMUSG00000000682.8	Cd52	-0.741768	6.051	6.27052	0.0214401	0.35751	244	513.03	475	173	497	237.26	586	583	102	450	658	692
	ENSMUSG00000000686.12	Abhd15	0.194735	2.6109	0.929701	0.339868	0.745897	30.72	55.84	37	31.69	31.41	32.65	40.85	31.5	3.61	28.93	22.27	40
	ENSMUSG00000000690.6	Hoxb6	-0.0790784	1.52681	0.0774025	0.782067	0.999758	18	21	21	12	10	25	20	14	3	15	22	26
	ENSMUSG00000000693.11	Loxl3	-0.241339	5.8863	2.80312	0.104352	0.599682	294.48	406.31	288.52	175.42	370.12	276.9	359.66	312.65	85.81	289.56	364.91	386.32
	ENSMUSG00000000706.17	Btn1a1	0	-1.59324	0	1	1	0	0	0	0	0	0	0	0	0	0	0	0
	ENSMUSG00000000708.15	Kat2b	0.00525669	6.48099	0.00291256	0.957189	1	489.84	833.98	705.93	527.95	740.95	489.9	688.87	631.93	104	553.99	697.89	605.96
	ENSMUSG00000000711.4	Rab5b	-0.104817	6.58277	1.2623	0.266913	0.665306	597.87	831.4	639.36	702.64	671.93	492.37	733.53	679.68	147.88	662.74	658.8	714.37
	ENSMUSG00000000724.11	Cryba1	-0.0325348	0.115271	0.00539461	0.941761	1	4	9	4	4	8	4	7	7	1	3	3	8
	ENSMUSG00000000730.14	Dnmt3l	0.144713	-0.174466	0.0770673	0.782527	0.999818	3	5	3	2	4	4	3	1	2	1	3	6
	ENSMUSG00000000731.16	Aire	-0.133549	-1.45107	0.0180324	0.89375	1	2	0	0	0	0	0	0	1	0	0	0	1
	ENSMUSG00000000732.10	Icosl	-0.0598919	4.63809	0.294957	0.589624	0.914686	138	246	164	131	175	132	176	160	30	140	191	189
	ENSMUSG00000000738.19	Spg7	0.141298	5.15266	1.26358	0.266673	0.665091	258	260	228	195	257	225	238	190	45	191	218	235
	ENSMUSG00000000739.15	Sult5a1	0.314541	2.42852	2.894	0.095507	0.591556	44	45	29	43	47	29	44	23	6	30	31	31
	ENSMUSG00000000740.13	Rpl13	0.240732	8.44214	4.06275	0.0507888	0.49841	2781.64	3172.01	2432.41	2797.05	3323.89	2975.07	2639.94	2590.3	480.07	2159.43	2558.44	2444.08
	ENSMUSG00000000743.10	Chmp1a	0.113147	6.53319	1.21387	0.276169	0.676431	638.95	725.78	593.94	616.94	717.79	675.91	632.85	626.97	121	544.98	631.99	630.97
	ENSMUSG00000000751.14	Rpa1	-0.0111116	5.66527	0.0119081	0.913568	1	305	359	280	255	326	315	306	278	62	293	324	342
	ENSMUSG00000000753.16	Serpinf1	0.471363	6.93671	10.5034	0.00319824	0.137389	917	1080	697	954	998	698	647	601	108	626	714	671
	ENSMUSG00000000759.15	Tubgcp3	0.0321639	5.75527	0.136869	0.713073	0.964986	357	457	360	327	388	313	385	335	68	312	365	400
	ENSMUSG00000000766.19	Oprm1	-0.0727697	-0.170258	0.0201218	0.887803	1	2	10	7	1	3	1	5	3	2	2	5	4
	ENSMUSG00000000776.14	Polr3d	0.165029	4.11506	1.12672	0.293891	0.696112	125	104	92	97	133	110	86	96	23	91	113	99
	ENSMUSG00000000782.17	Tcf7	-0.298179	3.6717	3.68436	0.0609975	0.520645	58	127	80	87	76	58	109	104	17	86	93	105
	ENSMUSG00000000787.13	Ddx3x	0.0633876	8.40814	0.373067	0.544275	0.888009	2263	3078	2477	2459	2497	1972.98	2553	2294	430	2128	2436	2414
	ENSMUSG00000000791.10	Il12rb1	-1.02366	4.29193	13.2789	0.00164397	0.0958638	55	85	102	20	103	38	141	100	28	85	143	205
	ENSMUSG00000000792.3	Slc5a5	-0.670258	-0.873994	0.893022	0.349485	0.753598	3	0	1	1	2	2	0	2	0	6	3	2
	ENSMUSG00000000794.10	Kcnn3	0.615097	3.67826	8.43866	0.00691132	0.206725	77	89	74	141	123	72	91	45	13	57	53	67
	ENSMUSG00000000804.15	Usp32	-0.157868	6.17364	2.2859	0.137239	0.644859	431	659	583	526	602	371	653	565	103	521	609	618
	ENSMUSG00000000805.19	Car4	-2.6478	0.861736	16.1695	0.00060485	0.0541818	3	4	2	3	4	2	31	4	0	53	6	8
	ENSMUSG00000000811.15	Txnrd3	0.211936	3.85196	2.34486	0.13239	0.634731	95	129	98	119	102	126	85	107	17	92	104	100
	ENSMUSG00000000817.11	Fasl	-0.588198	1.94276	4.98337	0.0303873	0.409324	13	39	17	4	18	22	31	30	7	20	28	28
	ENSMUSG00000000823.17	Zfp512b	0.0763753	5.902	0.698114	0.407639	0.797979	435	564	422	455	445	315	449	431	76	396	378	428
	ENSMUSG00000000826.17	Dnajc5	-0.0903435	7.21783	1.06686	0.306933	0.710737	778	1126	947	863	1023	636	1037	969	164	842	944	1015
	ENSMUSG00000000827.19	Tpd52l2	0.182116	5.73525	2.86292	0.0972526	0.596612	410	444	368	368	390	344	330.67	342	65	302	381	361
	ENSMUSG00000000838.18	Fmr1	-0.140954	6.07751	1.30524	0.260083	0.662338	368.17	618	538	381	512	394.21	529.56	466	98	479	514	578.29
	ENSMUSG00000000861.16	Bcl11a	-0.0883113	6.00255	0.66328	0.419505	0.808977	447	735	615.88	518.9	560.66	400	621	557	118	576	496	588.93
	ENSMUSG00000000869.13	Il4	2.15821	-1.32153	4.9088	0.0315927	0.411925	0	2	1	0	2	3	0	0	0	0	0	1
	ENSMUSG00000000876.12	Pxmp4	0.084838	4.90936	0.45265	0.504368	0.865678	178	260	214	246	226	132	213	217	34	184	193	182
	ENSMUSG00000000881.13	Dlg3	0.0482987	4.16472	0.142048	0.707947	0.962749	137	179	149	171	137	134	151	145	27	145	148	146
	ENSMUSG00000000884.18	Gnb1l	0.367273	2.15174	3.32701	0.0745016	0.548931	24	41	36	22	38	37	32	25	5	20	21	30
	ENSMUSG00000000901.18	Mmp11	0.484271	1.95512	4.40968	0.0411211	0.456831	29	31	19	31	30	22	24	27	3.06	21	12	13
	ENSMUSG00000000902.14	Smarcb1	0.0280431	5.90337	0.0888694	0.766931	0.995067	413	499	390	384	463	403	430	433	74	403	432	411
	ENSMUSG00000000903.4	Vpreb3	-0.513182	-0.589233	0.507432	0.479768	0.849793	4	2	0	1	1	0	3	1	1	2	1	2
	ENSMUSG00000000915.16	Hip1r	0.173733	6.24998	2.93498	0.0932588	0.585053	647.41	793.39	685.76	806.25	725.79	579.74	694.65	642.66	126.54	549.49	610.29	617.16
	ENSMUSG00000000916.16	Nsun5	0.495999	3.77741	12.9511	0.000765688	0.0630618	90.98	118.58	95.95	110.3	101.55	99.66	82.27	82.69	7.83	56.04	82.37	77.81
	ENSMUSG00000000934.10	Top1mt	0.428497	3.0872	6.5494	0.013765	0.29359	62	49	55	66	71	68	49	54	7	38	53	43
	ENSMUSG00000000938.12	Hoxa10	0.101171	3.13745	0.333709	0.566236	0.901604	63	87	57	71	63	54	94	59	10	62	45	50
	ENSMUSG00000000942.11	Hoxa4	0.023356	0.675977	0.0044203	0.947273	1	16	12	11	14	10.78	3	12	11	0	12	11	12
	ENSMUSG00000000948.17	Gm38393	0.0428312	0.367125	0.00972541	0.921861	1	13	3	7	13	6.32	6	10	10.1	0	9	2	11
	ENSMUSG00000000957.12	Mmp14	-0.212191	7.41798	4.63155	0.0365482	0.433909	831	1270	1104	738	971	793	1135	1078	241	823	1213	1108
	ENSMUSG00000000958.11	Slc7a7	-0.58957	3.79518	12.9854	0.000754784	0.0626725	56.33	97.44	85.75	33.34	75.81	43.41	103.44	86.45	18.85	63.47	113.4	121.4
	ENSMUSG00000000959.8	Oxa1l	-0.0930141	5.01929	0.795915	0.376855	0.773462	239.67	275.56	198.25	227.66	240.19	173.59	229.56	262.55	41.15	236.53	231.6	253.6
	ENSMUSG00000000976.14	Heatr6	-0.0238859	5.12186	0.0602151	0.807223	1	220	337	256	249	282	245	288	251	46	258	301	263
	ENSMUSG00000000982.6	Ccl3	-0.325822	2.94858	1.18172	0.288883	0.691052	39	70	71	23	59	51	81	56	11	47	90	57
	ENSMUSG00000000983.14	Wfdc18	0.0578377	2.49907	0.0834743	0.773912	0.99691	77	102	63	51	77	46	60	90	17	54	59	54
	ENSMUSG00000001014.7	Icam4	-0.105299	-0.856454	0.0165934	0.898053	1	3.8	0	2.26	0	0.63	1.49	1.19	0	0	0	5.39	1.39
	ENSMUSG00000001016.13	Ilf2	0.0632517	5.45396	0.378882	0.541167	0.886401	254.93	353.38	298.46	315.35	333.06	296.22	311.36	309.67	57.03	246.48	310.01	304.54
	ENSMUSG00000001017.16	Chtop	0.0197814	6.69181	0.0452614	0.832443	1	646	790	672	641	742	632	750	704	116	581	694	734
	ENSMUSG00000001018.16	Snapin	-0.149407	4.87608	0.708837	0.407764	0.797979	169.07	334.62	234.54	240.65	192.94	132.78	317.64	246.33	34.97	220.52	202.99	236.46
	ENSMUSG00000001020.9	S100a4	-0.0959445	7.28199	0.493592	0.487924	0.854718	873	1430	986	805	1207	830	1197	1000	200	895	1108	1245
	ENSMUSG00000001021.14	S100a3	0.354451	2.63064	2.49812	0.122523	0.61746	44	93	70	104	73	49	49	47	4	54	78	68
	ENSMUSG00000001023.11	S100a5	-1.20994	-0.803148	1.78797	0.187599	0.662338	2	0	0	0	2	0	5	0	0	4	0	0
	ENSMUSG00000001025.9	S100a6	0.128934	7.60499	0.322357	0.576737	0.907281	1200	1491	1041	1046	1665	1626	1312	1260	203	1035	1291	1476
	ENSMUSG00000001027.8	Scn4a	0.569865	5.64207	14.041	0.000805114	0.064909	442	454	202	399	415	279	317	227	41	245	218	238
	ENSMUSG00000001029.16	Icam2	-0.269776	2.29779	1.59013	0.213522	0.662338	24	30	36	19	38	15	42	22	5	26	36	39
	ENSMUSG00000001034.18	Mapk7	-0.139921	5.03574	1.54161	0.220529	0.662338	177	223	176	156	200	159	196	187	42	169	217	222
	ENSMUSG00000001036.18	Epn2	0.12602	6.07842	1.70361	0.19816	0.662338	487	664	517	547	521	450	575	527	70	467	432	517
	ENSMUSG00000001039.13	B9d1	-0.0684069	1.717	0.0846453	0.789039	1	16	28	21	16	28	15	21	20	5	16	29	20
	ENSMUSG00000001052.16	Sec24b	-0.189169	6.35747	2.21786	0.145342	0.660377	467	701	662	478	606	416	690	664	94	570	647	681
	ENSMUSG00000001053.16	N4bp3	0.207595	3.9196	1.60753	0.212017	0.662338	169	146	113	160	103	133	134	129	14	99	132	135
	ENSMUSG00000001054.10	Rmnd5b	0.0782451	4.48277	0.417238	0.521455	0.87583	164	202	143	163	189	155	185	159	32	130	169	158
	ENSMUSG00000001056.4	Nhp2	0.21103	5.15077	2.2189	0.144843	0.659567	214	244	231	257	262	263	204	231	36	206	239	203
	ENSMUSG00000001062.19	Vps9d1	-0.12446	5.07466	1.26735	0.26597	0.664437	202	285	230	224	239	157	266	227	54	219	208	262
	ENSMUSG00000001065.16	Zfp276	0.0725958	5.17365	0.342938	0.560935	0.897905	252.58	252.07	200.97	172.95	265.24	222.8	232.33	190.5	44.63	196.2	230.44	230.44
	ENSMUSG00000001076.8	C1ql4	1.54655	-1.15362	2.11168	0.152812	0.662338	0	1	2	2	0	0	0	0	0	1	0	0
	ENSMUSG00000001082.13	Mfsd10	0.0840139	4.44168	0.477981	0.492734	0.858048	111	205	159	121	159	118	168	140	23	105	137	141
	ENSMUSG00000001089.15	Luzp1	-0.055765	6.8925	0.355596	0.553819	0.893769	733	1111	827	786	856	648	934	852	167	741	859	869
	ENSMUSG00000001095.6	Slc13a2	-1.25365	-1.59362	1.91653	0.215017	0.662338	0	0	0	0	0	0	0	0	0	0	1	0
	ENSMUSG00000001098.16	Kctd10	-0.024368	6.44433	0.0741202	0.78662	1	517.86	630.88	578.5	450.16	535.32	455.1	572.62	529.57	106	475.69	526.73	572.5
	ENSMUSG00000001100.11	Poldip2	0.119726	5.1004	1.33078	0.25449	0.662338	231	283	221	280	305	233	231	264	50	227	226	228
	ENSMUSG00000001103.8	Sebox	0.357634	-0.773048	0.320888	0.573765	0.905358	4	3	2	4	5	0	1	5	0	2	2	2
	ENSMUSG00000001105.16	Ift20	-0.00784601	4.51509	0.00441814	0.947286	1	175	202	151	172	182	141	167	163	29	170	186	181
	ENSMUSG00000001119.8	Col6a1	0.104611	7.72267	0.970616	0.329563	0.735766	1336	1876	1171	1479	1402	1086	1557	1112	215	1472	1176	1228
	ENSMUSG00000001120.16	Pcbp3	0.13204	2.33434	0.352682	0.555442	0.89459	39	36	38	37	27	37	42	20	8	38	40	21
	ENSMUSG00000001123.16	Lgals9	-0.0786048	6.90735	0.385534	0.538745	0.886151	529	878	894	392	930	605	817	757	126	567	871	756
	ENSMUSG00000001127.13	Araf	0.0818489	6.03538	0.875933	0.354094	0.757071	456	570	449	486	526	474	490	436	94	405	476	520
	ENSMUSG00000001128.8	Cfp	-0.423638	5.92737	12.7379	0.000837212	0.0664034	297	386	323	198	326	223	375	388	75	314	441	430
	ENSMUSG00000001131.12	Timp1	-0.258119	5.83684	1.90049	0.182353	0.662338	277	497	325	135	340	328	374	349	78	292	462	384
	ENSMUSG00000001134.10	Uxt	0.0733857	2.34046	0.122165	0.728257	0.974404	28.94	45.81	35.8	34	42.83	35	44	34	4	27	41	36
	ENSMUSG00000001138.14	Cnnm3	0.286284	5.08872	6.36601	0.0150686	0.305743	220	349	242	282	287	261	268	235	31	215	199	240
	ENSMUSG00000001143.14	Lman2l	-0.16066	4.62855	1.84155	0.18124	0.662338	159	196	157	151	159	153	181	158	42	171	195	184
	ENSMUSG00000001150.8	Mcm3ap	-0.0254665	5.97536	0.0672774	0.796474	1	395	507.72	357.85	398	414	337.69	397.86	407.81	91	369	420.89	394.9
	ENSMUSG00000001151.11	Pcnt	0.158358	6.67061	2.62669	0.111761	0.599682	731.99	789.89	598.98	633.85	749.98	592	624	631.87	113	561.91	599	663
	ENSMUSG00000001155.14	Ftcd	0.840781	-1.25043	0.800584	0.375471	0.773462	0	3	1	0	3	0	2	0	0	0	0	1
	ENSMUSG00000001156.10	Mxd1	0.0291378	7.66574	0.0358049	0.851506	1	1281	1751	1740	801	1430	1221	1468	1336	265	957	1680	1256
	ENSMUSG00000001157.14	Gmcl1	-0.153509	3.99947	1.66863	0.202748	0.662338	110	145	109	104	125	89	143	118	18	115	137	134
	ENSMUSG00000001158.14	Snrnp27	-0.350786	3.8359	3.65003	0.0638069	0.531237	57	79	87	68	80	54	91	82	21	82	112	75
	ENSMUSG00000001166.18	Oas1c	-0.0592752	2.45444	0.11353	0.737658	0.979711	36	49	38	35	27	27.84	40	37.83	7	32	30	45
	ENSMUSG00000001168.17	Oas1h	0.305995	0.204515	0.571917	0.453266	0.838389	7	8	5	5	11	7	5	6	1	4	8	6
	ENSMUSG00000001173.16	Ocrl	-0.24392	5.55602	4.17995	0.0465196	0.48241	238	427	365	301	349	249	414	371	81	339	371	361
	ENSMUSG00000001175.17	Calm1	-0.342324	8.81425	13.9979	0.00049662	0.0501217	2354	3953	2905	2319	3314	2154	3513	3573	682	2778	3908	3987
	ENSMUSG00000001211.16	Agpat3	0.133006	6.49441	2.22504	0.14246	0.654126	675	823	639	774	732	620	701	646	125	594	675	628
	ENSMUSG00000001225.13	Slc26a3	0	-1.59424	0	1	1	0	0	0	0	0	0	0	0	0	0	0	0
	ENSMUSG00000001227.13	Sema6b	0.145042	4.43228	0.832369	0.366902	0.768079	104	113	85	76	136	133	115	101	20	86	98	89
	ENSMUSG00000001228.15	Uhrf1	-0.120828	5.88454	1.23032	0.272979	0.673162	280	450.47	346.18	275.01	365.9	419.82	413.71	375.48	77.63	336.9	402.94	406.83
	ENSMUSG00000001229.10	Dpp9	0.0416939	5.67745	0.186332	0.667958	0.940403	309	480	329	291	340	278	336	306	62	268	368	356
	ENSMUSG00000001240.14	Ramp2	0.0108706	4.23486	0.00576883	0.939778	1	108	179	91	105.03	103.26	108.84	120.98	93	33	92	126	112.15
	ENSMUSG00000001247.17	Lsr	0.00944913	4.53194	0.00583714	0.939424	1	201.77	244.24	233.29	212.97	217.44	171.13	266.76	222.39	31.94	188.04	208.9	205.06
	ENSMUSG00000001248.16	Gramd1a	-0.0544092	5.45626	0.238032	0.627896	0.931721	279.77	328	237.74	204	254	215.76	266.81	240	40	212	322.81	310
	ENSMUSG00000001249.15	Hpn	0.403548	1.85416	2.73065	0.105094	0.599682	19	33	24	25	19	14	14	24	4	16	12	16
	ENSMUSG00000001270.10	Ckb	-0.614162	5.76497	23.1211	2.03034e-05	0.00724726	221.89	330.5	199.83	230.73	274.92	159	335.78	362.96	81.9	248.87	354.67	442.95
	ENSMUSG00000001280.14	Sp1	-0.112564	7.4496	1.14296	0.290478	0.692482	949	1702	1389	1261	1328	884	1562	1354	216	1276	1341	1343
	ENSMUSG00000001281.11	Itgb7	-0.524956	6.1947	5.39629	0.0311578	0.411925	245	387	374	138	400	280	418	394	90	282	530	538
	ENSMUSG00000001285.13	Myg1	0.0859956	3.94927	0.448582	0.506281	0.866686	111	136.75	92.29	84.26	103.99	107.29	110.54	106	16	86.35	106	99.36
	ENSMUSG00000001288.16	Rarg	0.0288206	6.85931	0.0781015	0.781111	0.99933	890	1158	1008	1017	880	787	956	984	183	908	925	893
	ENSMUSG00000001289.13	Pfdn5	-0.00271934	5.35081	0.000598256	0.98059	1	239	310.97	250.42	239.5	283.01	196.71	269.35	252	47	232.5	262.44	251.64
	ENSMUSG00000001300.17	Efnb2	0.105995	6.10303	1.15872	0.287216	0.689486	500	592	529	599	550	395	493	531	92	459	491	480
	ENSMUSG00000001305.6	Rrp15	0.390584	4.20136	3.61501	0.0683949	0.548931	126	123	94	87	111	110	84	81	9	72	107	89
	ENSMUSG00000001313.13	Rnd2	0.607841	2.5031	7.80221	0.00752161	0.21749	47.08	43.52	27.13	57.7	37.06	45.42	33.23	24.72	6.11	27.54	23.07	32.78
	ENSMUSG00000001323.18	Srr	0.106762	3.75712	0.49557	0.484921	0.853135	82.43	162.14	127.92	118.24	124.05	75.71	119.85	110.87	22.15	95.3	97.31	99.32
	ENSMUSG00000001333.10	Sync	0.255103	3.59304	1.01754	0.32306	0.728963	60.84	80.91	41.68	83.86	69.53	44.09	53.67	65.3	10	46.61	49.66	49.27
	ENSMUSG00000001334.10	Fndc5	0.885145	1.6153	11.0103	0.00175351	0.0992408	29	23	23	25	24	18	11	17	1	16	8	14
	ENSMUSG00000001348.16	Acp5	0.290904	4.80599	4.9968	0.0301756	0.408288	233	174	144	206	189	152	150	150	31	148	138	162
	ENSMUSG00000001349.6	Cnn1	0.0847279	1.4486	0.0989661	0.754464	0.988511	20	26	12	22	22	12	17	26	1	15	20	15
	ENSMUSG00000001366.15	Fbxo9	0.103807	4.6535	0.802384	0.374939	0.773462	203	226	171	211	239	166	201	162	40	189	191	187
	ENSMUSG00000001376.18	Vps50	0.0218304	5.2058	0.0406211	0.841139	1	243	284	259	263	316	269	267	245	65	239	272	282
	ENSMUSG00000001380.8	Hars	0.230084	5.54053	2.36055	0.135178	0.640661	297	323	272	337	340	378	325	269.87	36	266	317.87	283.75
	ENSMUSG00000001383.10	Zmat2	0.00658102	4.90202	0.00286549	0.957536	1	181	261	175	178	176	159	185	170	31	172	226	195
	ENSMUSG00000001403.14	Ube2c	0.313092	4.49098	2.38558	0.135516	0.641126	181.51	158.67	116.62	153.9	165.14	85.13	129.98	105.51	17.22	124.72	104.37	122.69
	ENSMUSG00000001415.11	Smg5	-0.0386244	6.20727	0.170826	0.681256	0.948187	431	604	464	452	484	432	538	450	101	426	512	503
	ENSMUSG00000001416.14	Cct3	0.103631	6.7387	1.12798	0.293626	0.695646	629	805	636	607	734	804	665	614	135	553	712	724
	ENSMUSG00000001418.14	Glmp	-0.168639	5.85509	2.08375	0.155496	0.662338	380.53	516.08	405.66	334.91	421.35	350.6	433.59	430.8	95.27	356.64	511.62	489.5
	ENSMUSG00000001419.18	Mef2d	0.206992	7.18732	5.14291	0.0279719	0.398743	930.63	1203.02	836.88	938.88	955.14	741.9	921.12	801.68	114	784.51	825	872.51
	ENSMUSG00000001420.14	Tmem79	0.0928938	4.56768	0.372448	0.545593	0.888819	195.47	259.92	274.34	292.09	191.65	253.4	273.41	239.2	47.73	222.36	214.38	198.5
	ENSMUSG00000001424.15	Snd1	-0.0309785	7.21206	0.0979508	0.755685	0.989437	847	1100	875	748	1000	898	946	878	202	757	992	999
	ENSMUSG00000001435.16	Col18a1	-0.232715	6.82599	4.39299	0.0414895	0.459365	550	812	592	542	714	596	642	725	168	609	826	808
	ENSMUSG00000001436.16	Slc19a1	0.176583	3.6777	1.21595	0.275762	0.675952	79	103	89	88	86	82	93	67	26	68	74	62
	ENSMUSG00000001440.6	Kpnb1	-0.143283	7.92866	2.79039	0.101467	0.599682	1294	1921	1485	1277	1520	1349	1703	1596	316	1345	1782	1688
	ENSMUSG00000001441.14	Npepps	0.169775	6.9321	3.55774	0.0654457	0.537377	963	1166	988	992	1101	1022	921	884	171	879	1058	925
	ENSMUSG00000001444.3	Tbx21	-0.53676	2.71029	6.13149	0.0169308	0.32214	29	40	30	15	28	32	36	46	12	19	48	55
	ENSMUSG00000001445.11	Mrpl10	-0.0484983	4.70722	0.197615	0.65869	0.935909	155	228.87	173	169.99	179.96	136.91	183	184.94	27	174	203	169.84
	ENSMUSG00000001467.6	Cyp51	0.0871582	5.35811	0.701801	0.406412	0.796963	322	403	347	325	373	299	347.5	306	59	329	318	331
	ENSMUSG00000001472.18	Tcf25	-0.0549082	7.49991	0.449211	0.505984	0.86649	1103	1561	1192	1154	1235	957	1341	1215	237	1148	1209	1290
	ENSMUSG00000001473.8	Tubb6	-0.202716	6.259	3.88529	0.0546052	0.502499	312	599	400	317	446	328	485	485	94	377	475	426
	ENSMUSG00000001482.16	Def8	0.146646	5.71757	2.28927	0.136956	0.644151	348	425	352	445	413	367	379	359	65	338	339	373
	ENSMUSG00000001493.10	Meox1	0.304561	2.86659	1.93015	0.171278	0.662338	33	60	27	26	45	36	25	30	7	30	28	36
	ENSMUSG00000001494.7	Sost	0.202291	0.852275	0.378173	0.541544	0.886401	18	10	9	10	14	6	7	8	4	12	9	9
	ENSMUSG00000001497.19	Pax9	0.39989	0.977837	1.70674	0.197755	0.662338	12	20	11	11	9	11	8	8	4	8	10	9
	ENSMUSG00000001504.11	Irx2	0.0962829	4.04768	0.505167	0.480745	0.850262	113	145	127	120	137	86	117	104	27	112	101	116
	ENSMUSG00000001506.11	Col1a1	0.744299	12.2081	5.79841	0.0262401	0.387165	32074	32054	18429	36834	28133	27799	13564	16000	2691	18954	19287	23423
	ENSMUSG00000001507.17	Itga3	0.179661	5.86749	2.67346	0.108704	0.599682	456	517	445	484	492	527	442	396	91	381	550	376
	ENSMUSG00000001508.16	Sgca	0.558615	3.49106	8.28137	0.0065581	0.201551	107	112	62	115	99	43	75	56	8	58	50	71
	ENSMUSG00000001510.9	Dlx3	-0.0607272	4.58419	0.126021	0.725293	0.972453	200	310	237	323	212	167	269	250	38	287	222	253
	ENSMUSG00000001517.15	Foxm1	-0.245708	4.96499	4.73337	0.0346369	0.426125	141	250	203	170	207	151	234	215	36	202	212	256.99
	ENSMUSG00000001518.13	Itfg2	0.0384595	4.00571	0.0675956	0.796004	1	86	135	72	112	121	74	113	73	13	83	115	114
	ENSMUSG00000001520.13	Nrip2	-0.137201	1.67223	0.27595	0.601834	0.922359	6	20	16	24	14	17	17	16.42	2	18	18	22
	ENSMUSG00000001521.13	Tulp3	0.136888	4.12681	1.28704	0.262338	0.662338	101	128	121	113	131	88	105	101	17	79	127	113
	ENSMUSG00000001524.15	Gtf2h4	0.0833912	3.10673	0.19961	0.657085	0.935311	63	66	38	68	62	48	40	61	12	37	63	68
	ENSMUSG00000001525.11	Tubb5	-0.241917	8.78777	6.70339	0.0127632	0.286014	2216	3633	2701	2223	2932	2276	3259	3118	635	2619	3215	3244
	ENSMUSG00000001542.8	Ell2	-0.217061	6.38802	4.33227	0.04286	0.467977	522	813	683	545	692	551	709	692	150	631	815	787
	ENSMUSG00000001552.15	Jup	0.0614115	9.1559	0.331807	0.567341	0.902275	4676	6498	5790	7039	5731	4831	6182	6130	950	5524	5279	5020
	ENSMUSG00000001555.11	Fkbp10	-0.0695018	5.3426	0.389682	0.53548	0.884644	200	290.39	211.82	213.82	230.94	165.8	229.94	220.64	55	197.92	228.9	227.96
	ENSMUSG00000001558.6	Klhl10	-0.669239	-0.689547	1.1873	0.281421	0.6831	1	1	2	3	2	2	7	1	0	3	2	3
	ENSMUSG00000001569.11	Nom1	0.288091	5.51491	5.88433	0.0191626	0.340497	290	316	249	252	358	303	273	221	43	232	258	240
	ENSMUSG00000001576.16	Ergic1	-0.205561	5.6854	2.55569	0.117873	0.608898	253	487	325	264	335	249	414	335	63	324	372	394
	ENSMUSG00000001583.14	Tnk1	0.454564	2.74263	6.84824	0.0118916	0.277421	59.81	66.64	48.71	74.49	61.55	56.24	42.57	49.32	8.85	42.89	50.75	37.89
	ENSMUSG00000001588.13	Acap1	-0.6909	3.83985	20.7384	3.72343e-05	0.0110926	68	77	64	50	66	54	88	109	31	78	104	102
	ENSMUSG00000001604.15	Tcea3	0.677127	3.30644	11.1118	0.00190166	0.102536	94	86	42	86	82	68	65	34	6	62	37	47
	ENSMUSG00000001627.13	Ifrd1	0.165594	6.04795	2.94748	0.0925852	0.583499	461.29	572.63	471.92	524.66	627.57	499.58	511.22	476.91	87	403.39	504.89	472.11
	ENSMUSG00000001630.14	Stk38l	0.169344	4.98048	2.48583	0.121573	0.615509	208.88	263.92	219.5	197.65	262.05	231.42	213.65	189.37	33.59	185.9	246.57	211.7
	ENSMUSG00000001632.17	Brpf1	-0.170571	6.31766	3.21161	0.0795455	0.548931	381.96	579.97	517	362.9	541.37	385.95	582.91	507.9	107	418	531	517.98
	ENSMUSG00000001642.19	Akr1b3	0.023328	5.32242	0.0434039	0.835865	1	220.76	337.36	264.14	216.75	282.24	267.91	280.56	234.89	35.51	245.74	312.9	276.84
	ENSMUSG00000001655.7	Hoxc13	0.0634741	2.63568	0.118196	0.73253	0.976791	49	91	53	63	58	30	52	49	13	63	55	43
	ENSMUSG00000001656.4	Hoxc11	0.103428	3.41224	0.448086	0.506515	0.866837	101	103	75	84	78	84	87	94	15	73	94	63
	ENSMUSG00000001657.8	Hoxc8	-0.178503	2.58589	0.839055	0.364336	0.766447	46	68	42	57	49	27	37	60	10	49	71	53
	ENSMUSG00000001661.6	Hoxc6	-0.0305803	2.45183	0.0228507	0.880492	1	38	61	51	45	50	37	39	49	7	49	38	68
	ENSMUSG00000001663.11	Gstt1	0.0430335	2.63601	0.048915	0.825919	1	36	45	37	41	35	24	44	28	10	29	45	24
	ENSMUSG00000001665.12	Gstt3	0.377241	3.53284	6.11275	0.0170898	0.323214	95	90	97	99	101	107	78	66	20	81	67	77
	ENSMUSG00000001666.9	Ddt	-0.0198351	3.05462	0.0109301	0.917179	1	43	81	49	67	64	39	57	51	7	52	64	72
	ENSMUSG00000001670.14	Tat	0	-1.6239	0	1	1	0	0	0	0	0	0	0	0	0	0	0	0
	ENSMUSG00000001672.15	Marveld3	0.204004	2.38046	1.22491	0.274022	0.674585	43	60	55	47	41	49	58	37	6	45	36	43
	ENSMUSG00000001674.12	Ddx18	0.147413	5.12499	1.65771	0.204207	0.662338	238.97	259.43	219.48	166.14	278.08	230.22	224.09	190.69	35.21	174.93	241.15	239.15
	ENSMUSG00000001687.16	Ubl3	-0.0193429	7.17086	0.03792	0.846442	1	938	1181	955	1033	1181	851	1139	990	204	888	1023	1124
	ENSMUSG00000001700.11	Gramd3	0.130997	5.14022	1.5176	0.2241	0.662338	254	321	303	298	365	271	309	271	34	263	287	316
	ENSMUSG00000001707.9	Eef1e1	0.300829	3.69945	3.87016	0.05506	0.503462	91	113	108	74	102	88	95	70	9	52	105	85
	ENSMUSG00000001729.15	Akt1	0.069631	7.38002	0.572556	0.453015	0.838179	907	1219	996	939	1113	894	1067	948	174	829	1033	992
	ENSMUSG00000001739.15	Cldn15	-0.243581	0.51775	0.387394	0.536676	0.885221	7	7	3	12	4	6	6	11	0	8	5	11
	ENSMUSG00000001741.13	Il16	-0.0301275	5.35861	0.0746544	0.785872	1	274.01	323.37	156.47	250.04	243.58	165.12	255.89	224.34	40.63	230.36	258.72	239.54
	ENSMUSG00000001750.17	Tcirg1	-0.431411	6.99347	13.384	0.000707386	0.0605505	517	748	655	367	695	465	741	789	143	584	857	901
	ENSMUSG00000001751.10	Naglu	-0.208301	3.96521	2.37227	0.130203	0.630924	79	148	88	75	95	74	97	95	26	95	103	127
	ENSMUSG00000001755.13	Coasy	0.0488392	4.37683	0.1757	0.677002	0.945861	153	189	132	132	143	150	174	145	29	128	123	154
	ENSMUSG00000001761.8	Smo	0.0759314	5.59215	0.476975	0.493187	0.858077	308	421	278	352	359	266	319	320	68	283	324	286
	ENSMUSG00000001763.15	Tspan33	0.329863	1.20486	0.945163	0.335922	0.741442	15	8	9	11	14	7	8	4	2	9	5	16
	ENSMUSG00000001767.6	Crnkl1	-0.0044607	4.86021	0.00159209	0.968341	1	200	232	204	174	203	165	191	191	39	181	228	190
	ENSMUSG00000001768.17	Rin2	-0.157523	7.93186	2.67925	0.108332	0.599682	1262	1846	1633	1042	1745	1192	1743	1560	313	1280	1741	1726
	ENSMUSG00000001773.15	Folh1	-1.90841	-1.56463	3.68363	0.079522	0.548931	0	0	0	0	0	0	1	0	0	0	1	0
	ENSMUSG00000001774.9	Chordc1	-0.0634639	5.12011	0.301812	0.585345	0.912214	284	315	237	237	278	277	306	232	49	236	333	345
	ENSMUSG00000001783.4	Rtcb	0.113895	6.18381	1.08337	0.30326	0.706572	421	558	406	355	506	425	436	411	75	328	488	411
	ENSMUSG00000001785.14	Pwp1	0.110693	4.37122	0.831937	0.36636	0.767872	115	161	163	136	183	145	155	123	27	109	152	162
	ENSMUSG00000001786.15	Fbxo7	-0.0864785	4.7312	0.590629	0.446014	0.832235	181.14	208.08	178.47	134.76	192.74	157.9	164	198	35	158.84	193.19	220.84
	ENSMUSG00000001794.14	Capns1	-0.124869	7.11609	1.29555	0.260788	0.662338	757	1180	870	733	971	675	965	949	166	812	1049	950
	ENSMUSG00000001802.17	Lrp3	0.480899	3.4841	8.54127	0.00532017	0.182789	68.38	88	56.83	88	76.54	61	66.56	52	9	53	48	44
	ENSMUSG00000001804.10	Dsg4	0.318655	0.47123	0.663079	0.419575	0.809067	4	26	9	10	25	2	8	8	1	9	14	11
	ENSMUSG00000001815.16	Evx2	0.458822	0.498667	1.11663	0.296039	0.69867	10	8	10	10	6	1	4	2	1	8	6	7
	ENSMUSG00000001819.5	Hoxd13	0.272269	3.10654	1.94135	0.170067	0.662338	71	72	48	54	53	31	37	33	6	57	39	64
	ENSMUSG00000001823.6	Hoxd12	-0.196606	-0.62526	0.0484282	0.826773	1	1	3	0	0	1	0	0	0	0	1	2	2
	ENSMUSG00000001827.13	Folr1	0.281124	-1.32113	0.0760201	0.783972	1	0	1	0	1	1	0	0	0	0	0	0	2
	ENSMUSG00000001829.18	Clpb	0.13976	4.63867	1.32799	0.254982	0.662338	200	189	137	180	199	201	173	150	37	166	176	166
	ENSMUSG00000001833.18	Septin7	-0.161641	6.90612	2.52887	0.118474	0.609864	761.51	1210	851	734.41	997	707	982	893	200	841	980	1102
	ENSMUSG00000001844.11	Zdhhc4	-0.0204567	4.39465	0.0310697	0.860841	1	115	171	133	132	139	137	144	132	27	132	155	136
	ENSMUSG00000001847.15	Rac1	-0.187291	8.06421	4.1721	0.0467172	0.4838	1570.7	2337.93	1827.15	1394.76	2115.96	1507.41	2172.7	1972.6	390.91	1678.86	2091.14	2220.78
	ENSMUSG00000001855.16	Nup214	-0.136005	6.36172	1.89588	0.175052	0.662338	522.71	700.56	642.24	538.88	604.6	460.67	702.28	650.9	107	537.98	663.06	681.87
	ENSMUSG00000001864.14	Aif1l	-0.0673316	4.72327	0.254953	0.616047	0.930737	201	325	307	386	285	191	365	306	49	284	287	259
	ENSMUSG00000001865.3	Cpa3	-0.0451128	3.47284	0.0327432	0.857999	1	90	127	86	87	107	56	101	93	13	80	103	107
	ENSMUSG00000001870.17	Ltbp1	0.301666	7.03688	10.1819	0.00252577	0.122335	814	1040	824	665	904	894	782	709	110	633	785	681
	ENSMUSG00000001891.17	Ugp2	0.0615013	6.5179	0.292622	0.591185	0.915571	591	964	617	689	828	569	778	607	112	664	656	730
	ENSMUSG00000001901.16	Kcnh6	-0.708924	-1.02726	0.767319	0.385496	0.779333	4	2	0	1	1	0	0	0	2	2	6	1
	ENSMUSG00000001909.17	Trmt1	0.209959	5.30778	3.94859	0.0527467	0.49841	280	300	234	305	342	284	261	259	49	214	270	261
	ENSMUSG00000001910.6	Nacc1	-0.141282	6.6456	2.50964	0.119847	0.612745	568.75	808.59	674.3	620.63	720.83	506.41	746.63	722.35	129.84	598.85	776.06	756.41
	ENSMUSG00000001911.17	Nfix	0.0808269	8.77044	0.739054	0.394321	0.786761	2631.87	3906.85	2955.48	3285.96	3231.64	2299.19	3305.35	2876.48	545.76	2838.26	2405.68	2891.11
	ENSMUSG00000001918.18	Slc1a5	0.319323	6.38878	8.57491	0.00523783	0.182406	527	662	555	537	530	427	496	378	81	417	432	444
	ENSMUSG00000001924.16	Uba1	-0.122364	8.0688	1.91962	0.172428	0.662338	1501	2397	1996	1590	1853	1553	2108	1846	372	1665	2224	2030
	ENSMUSG00000001930.18	Vwf	0.121651	5.87119	1.22588	0.273834	0.67443	363	404	279	322	366	247	291	313	64	270	254	363
	ENSMUSG00000001942.9	Siae	-0.128997	4.03683	1.06007	0.308461	0.712561	126.89	134.24	104.69	110.98	109.7	87.05	123.31	114.99	27.3	90.09	135.73	142.72
	ENSMUSG00000001943.9	Vsig2	0.358375	0.935317	1.18279	0.282325	0.683857	6	14	7	13	8	7	11	10	1	4	6	5
	ENSMUSG00000001946.15	Esam	0.143663	4.29291	1.19748	0.279393	0.680797	109	121	101	87	128	111	97	92	21	89	104	111
	ENSMUSG00000001948.11	Spa17	0.0628208	-0.732149	0.0099016	0.921158	1	3	1	3	4	1	3	0	4	2	2	2	2
	ENSMUSG00000001962.9	Fam50a	-0.117109	4.14616	0.610819	0.438393	0.825875	105	106	90	97	100	101	98	113	23	89	124	117
	ENSMUSG00000001964.15	Emd	-0.0204746	4.6691	0.0187246	0.8919	1	137.32	233.39	197.38	198.88	214.27	163.82	212.26	208.83	27.8	169.29	193.24	209.83
	ENSMUSG00000001983.8	Taco1	0.207819	2.63805	1.15221	0.288558	0.690622	52	42	35	39	49.95	51	51	30	13	33	29.71	42
	ENSMUSG00000001985.10	Grik3	0.320849	1.05908	1.04708	0.31141	0.716067	9	11	8	22	10	13	13	11	2	7	9	9
	ENSMUSG00000001986.17	Gria3	-0.0152803	2.87151	0.00585302	0.939342	1	36	63	37	33	49	31	46	21	12	45	45	42
	ENSMUSG00000001988.10	Npas1	0.0564467	-0.271314	0.0095268	0.92266	1	6	3	0	1	6	2	3	1	0	5	4	2
	ENSMUSG00000001995.10	Sipa1l2	-0.00172929	6.17054	0.000328134	0.985624	1	437	524	460	440	550	373	531	454	83	400	473	489
	ENSMUSG00000001998.16	Ap4e1	-0.0426558	4.87811	0.17243	0.679848	0.947545	209	252	215	196	241	185	253	231	36	194	228	231
	ENSMUSG00000001999.16	Blvra	-0.0855204	4.18884	0.386913	0.536927	0.885251	102	124	86	77	125	76	115	101	12	84	120	120
	ENSMUSG00000002006.13	Pdzd4	0.183165	3.58688	1.52836	0.222491	0.662338	90	94	63.53	81.42	83	67.55	61	73	17	61.73	67	81.51
	ENSMUSG00000002007.6	Srpk3	0.302701	2.52605	2.18615	0.145917	0.661504	40	48	20	37	43	28	36	26	5	29	28	27
	ENSMUSG00000002010.18	Idh3g	0.0976492	5.32133	0.995079	0.323604	0.729201	300	361	233	287	318	222	300	252	52	242	271	268
	ENSMUSG00000002012.14	Pnck	-0.058359	-0.405266	0.00724755	0.932517	1	1	1	3	3	2	1	1	5	0	2	2	0
	ENSMUSG00000002014.13	Ssr4	0.118451	5.34898	1.41245	0.240611	0.662338	247	352	301	251	337	299	301	245	51	255	306	273
	ENSMUSG00000002015.6	Bcap31	0.0369992	6.08715	0.0885549	0.767579	0.995422	487	498	377	371	496	404	420	467	72	355	451	494
	ENSMUSG00000002017.11	Fam98a	0.127454	4.83538	1.25067	0.269098	0.668493	201	265	209	212	198	183	217	165	36	180	217	193
	ENSMUSG00000002020.16	Ltbp2	-0.117685	5.91009	0.98613	0.325767	0.731578	296.55	386.38	335.12	210.21	336.75	297.67	371.33	367.8	52	276.59	358.31	357.47
	ENSMUSG00000002028.14	Kmt2a	-0.100988	7.92655	1.24235	0.270677	0.670669	1552.14	2263.69	1772.75	1534.8	1683.79	1140.77	1868.78	1709.44	339.83	1576.84	1819.7	1817.78
	ENSMUSG00000002031.14	Ift46	-0.0886655	4.04167	0.461512	0.500245	0.862473	123	145	102	109	133	66	114	112	26	116	101	143
	ENSMUSG00000002032.18	Tmem25	0.572444	0.492225	1.76185	0.190795	0.662338	9	6	8	7	22	2	6	9	1	3	4	8
	ENSMUSG00000002033.15	Cd3g	-1.04185	2.28724	16.8538	0.000169806	0.0268797	11	46	15	10	26	13	53	43	11	22	34	45
	ENSMUSG00000002043.18	Trappc6a	0.198652	3.25592	1.34038	0.252808	0.662338	66	83	60	85	79	65	65	67	11	68	66	54
	ENSMUSG00000002052.7	Supt6	0.054028	7.02138	0.347155	0.558545	0.896379	826.57	999.25	770.82	795.32	853.99	745.35	833.65	809.53	159.99	680.61	823.51	844.17
	ENSMUSG00000002055.10	Spag5	-0.106642	4.02752	0.621606	0.434403	0.822427	96	138	97	88	113	96	105	104	24	104	105	137
	ENSMUSG00000002057.5	Foxn1	-0.218902	3.50453	1.29376	0.263623	0.662338	77	168	116	123	105	86	143	132	26	127	126	115
	ENSMUSG00000002058.14	Unc119	-0.695127	2.73184	13.9385	0.000508856	0.0506911	30	42	28	23	27	18	48	45	4	52	43	46
	ENSMUSG00000002059.19	Rab34	0.263188	3.87749	3.81261	0.0568283	0.506314	103	129	98	101	122	98	99	89	15	89	94	86
	ENSMUSG00000002064.11	Sdf2	0.0312841	4.52296	0.0740635	0.7867	1	130.43	180.75	142.18	170.68	194.01	166.65	176.35	157.47	28.01	160.39	150.49	167.83
	ENSMUSG00000002068.17	Ccne1	-0.0583176	2.51829	0.0743429	0.786308	1	18	41	27	22	35	31	27	27	6	13	45	39
	ENSMUSG00000002076.13	Hsf2bp	-0.0685244	-0.141313	0.0152535	0.902233	1	3	2	5	4	5	1	2	2	1	5	4	4
	ENSMUSG00000002083.14	Bbc3	-0.017118	2.44371	0.00566427	0.940326	1	29	38	37	29	34	27	23	37	6	27	37	40
	ENSMUSG00000002100.16	Mybpc3	0.358482	0.0298763	0.451052	0.505118	0.865997	6	6	1	3	5	0	4	4	0	1	3	2
	ENSMUSG00000002102.16	Psmc3	0.168946	6.96857	1.22082	0.279828	0.681418	761	834	619	702	818	860	692	669	150	551	707	755
	ENSMUSG00000002103.17	Acp2	-0.673709	6.17411	15.2547	0.000746901	0.0622424	354.36	548.16	422.52	300.26	444.48	242.79	634.06	559.88	114.76	436.39	685.72	735.84
	ENSMUSG00000002104.12	Rapsn	0.118921	1.3259	0.151376	0.698978	0.957312	20	16	11	19	14	7	10	16	0	23	8	13
	ENSMUSG00000002105.16	Slc39a13	-0.123558	4.56822	1.0016	0.32204	0.727707	143	230	134	154	132	105	158	162	30	145	177	167
	ENSMUSG00000002107.19	Celf2	-0.398782	6.93921	10.5104	0.0025234	0.122335	585	997	706	622	777	428	886	836	185	729	906	1033
	ENSMUSG00000002108.11	Nr1h3	-0.713126	3.96935	12.9497	0.00112505	0.0797591	62	80	76	39	57	65	90	93	20	64	129	147
	ENSMUSG00000002109.15	Ddb2	-0.0183196	3.28905	0.0138242	0.906904	1	66.64	102.84	69.48	75.74	83.52	71.21	84.94	68.12	20.24	76.61	60.28	92.16
	ENSMUSG00000002111.9	Spi1	-0.504323	6.43475	12.804	0.00123439	0.083165	318	550	468	224	505	301	575	570	113	344	673	585
	ENSMUSG00000002129.12	Sf3a1	-0.152634	6.19083	2.55047	0.116953	0.606384	392	527	436	406	451	391	528	465	93	448	490	478
	ENSMUSG00000002147.19	Stat6	-0.177302	7.17769	3.47142	0.0686828	0.548931	718	1155	965	788	963	798	1040	990	199	853	1071	1086
	ENSMUSG00000002190.14	Clgn	0.96514	-1.20118	0.831146	0.378286	0.773462	1	0	1	1	0	0	1	0	0	0	0	0
	ENSMUSG00000002204.10	Napsa	-0.200034	4.50643	1.38842	0.24767	0.662338	116.22	168.56	179.91	83.18	179.91	110.91	158.78	162.44	26	99.97	183.85	211.69
	ENSMUSG00000002205.17	Vrk3	-0.341153	4.34322	8.93759	0.00443117	0.166973	115	166	113	111	150	94	151	167	30	121	179	168
	ENSMUSG00000002210.12	Smg9	0.00740281	4.70218	0.00406575	0.949429	1	155	175	130	152	183	127	161	165	18	136	171	163
	ENSMUSG00000002221.12	Paxip1	-0.0252757	5.16815	0.0591514	0.808899	1	207	303	239	238	286	212	261	273	43	218	268	252
	ENSMUSG00000002222.15	Rmnd5a	0.104128	7.2296	1.21744	0.275472	0.675895	1205	1571	1214	1456	1421	931	1422	1145	210	1176	1134	1230
	ENSMUSG00000002227.16	Mov10	-0.195503	5.8626	2.09282	0.157084	0.662338	258	459	402	200	388	263	384	341	76	258	447	422
	ENSMUSG00000002228.8	Ppm1j	0.0471996	1.91127	0.0388478	0.877565	1	23	25	19	29	26	16	19	22	2	24	20	30
	ENSMUSG00000002233.14	Rhoc	0.206407	5.7654	2.39734	0.130062	0.630888	334	369	273	194	377	292	298	262	43	198	317	285
	ENSMUSG00000002249.22	Tead3	0.269812	5.51603	5.8572	0.0194261	0.342275	444	513	364	489	419	415	429	374	64	355	359	342
	ENSMUSG00000002250.17	Ppard	-0.047706	5.40662	0.197138	0.659075	0.936133	270	355	334	283	313	240	344	295	59	300	310	294
	ENSMUSG00000002257.9	Def6	-0.131321	4.58509	0.909852	0.345026	0.75033	135.51	171.35	127.18	126.51	143.02	139.5	156.99	175.48	34	109.34	167.29	152.3
	ENSMUSG00000002265.18	Peg3	0.137563	5.07417	0.917664	0.344154	0.749717	270	210	146	225	176	144	165	172	31	146	198	224
	ENSMUSG00000002266.18	Zim1	-0.21845	0.605456	0.383416	0.538766	0.886151	5	9	5	10	4	5	7	8	2	7	4	10
	ENSMUSG00000002274.14	Metrn	0.144488	2.68792	0.640163	0.427671	0.817009	29	51.8	33	34	41	45	35	37	6	28	34	44
	ENSMUSG00000002279.20	Lmf1	-0.0225984	4.007	0.0217376	0.883417	1	94	125	96	118	111	81	119	101	30	94	103	86
	ENSMUSG00000002280.12	Ciao3	-0.128436	4.51074	1.33087	0.254474	0.662338	143.7	190.83	149.94	146.33	183.3	127.51	165.56	182.37	37.95	131.92	169.41	191.86
	ENSMUSG00000002289.17	Angptl4	0.0966652	4.9381	0.264534	0.611838	0.928335	186	253	296	126	252	194	194	204	36	145	313	175
	ENSMUSG00000002297.17	Dbf4	-0.319936	3.91189	4.88042	0.0320649	0.413847	101	105	77	78	98	92	124	79	26	89	129	148
	ENSMUSG00000002307.17	Daxx	-0.0110432	6.87073	0.00638469	0.936859	1	509	781	863	362	854	545	768	608	120	483	774	671
	ENSMUSG00000002308.17	Cd320	0.0407741	2.26102	0.0392485	0.865421	1	30	34	18	29	34	40	29	33	5	32	32	26
	ENSMUSG00000002319.17	Ipo4	0.296045	5.55064	6.71669	0.0126804	0.28545	322	351.55	283.72	270.03	407	328.15	292.87	270.17	39.7	238.27	304.02	271.5
	ENSMUSG00000002320.16	Tm9sf1	-0.0254328	5.80919	0.0549005	0.815762	1	358.32	471.42	344.79	320.83	390.29	335.75	414.21	320.14	79.4	329.11	393.45	402.22
	ENSMUSG00000002324.9	Rec8	0.323615	1.3275	1.72598	0.195292	0.662338	16	41	21	25	30	27	25	19	2	25	17	23
	ENSMUSG00000002325.16	Irf9	-0.178103	6.8384	3.22339	0.0790138	0.548931	695	1008	884	612	881	598.28	978	771	180	721	983	885
	ENSMUSG00000002326.7	Gmpr2	-0.196025	3.6147	1.52048	0.223669	0.662338	57.45	94.77	58.5	49.15	74.61	47.9	71.72	58.09	15.32	55.13	99.92	74.1
	ENSMUSG00000002329.8	Mdp1	-0.0333782	3.78415	0.060716	0.806439	1	99	98	93	94	108	92	100	101	17	83	121	103
	ENSMUSG00000002332.17	Dhrs1	0.0557314	5.02607	0.311963	0.579125	0.908349	249	329	252	274	300	268	301	279	54	239	271	245
	ENSMUSG00000002341.9	Ncan	-0.100485	-1.59363	0.0105418	0.918761	1	0	0	0	0	0	1	0	0	0	0	0	1
	ENSMUSG00000002342.18	Tmem161a	0.213524	4.29701	3.27696	0.076644	0.548931	132	163	118	127	146	113	127	127	17	96	122	115
	ENSMUSG00000002343.12	Armc6	0.313352	2.85429	2.01256	0.163825	0.662338	52.92	63.38	46.59	42	40.96	74.74	41.62	41.3	7	35.3	54.76	48
	ENSMUSG00000002345.19	Borcs8	0.0844628	3.0147	0.229004	0.634478	0.931721	54	93	55	62	51	42	57	49	10	45	68	61
	ENSMUSG00000002346.17	Slc25a42	0.293942	3.24806	3.55707	0.06547	0.537449	80	78	70	86	90	52	65	72	8	61	58	62
	ENSMUSG00000002365.11	Snx9	0.0501362	6.19863	0.288942	0.593431	0.917092	477	611	466	465	562	367	487	490	77	457	451	521
	ENSMUSG00000002372.10	Ranbp3	0.0666137	5.90788	0.422546	0.518829	0.87455	382	449	365	340	411	382	414	363	59	350	389	390
	ENSMUSG00000002379.8	Ndufa11	0.0868306	4.41769	0.388169	0.53627	0.884985	135	159	131	159	195	156	166	147	26	133	144	154
	ENSMUSG00000002384.3	Bmp8b	0.0630558	0.262724	0.0239883	0.877577	1	6	14.34	8	5.11	4	7	8	5	2	9	4	8
	ENSMUSG00000002393.15	Nr2f6	0.293407	4.57932	1.90422	0.181531	0.662338	182.43	183.44	154.2	187.62	162.51	206.14	176.31	142.02	25.67	125.07	153.11	156.09
	ENSMUSG00000002395.15	Use1	0.375275	5.38097	6.21142	0.0183789	0.33379	336	326	222	264	347	280	252	237	31	198	231	270
	ENSMUSG00000002396.9	Ocel1	0.126956	4.75037	1.11173	0.297088	0.700051	234.57	239.56	191.8	171.38	161.49	160.86	182.69	173.98	36.33	150.93	184.89	189.91
	ENSMUSG00000002409.19	Dyrk1b	0.014595	4.0563	0.0115775	0.914771	1	119	147	111	142	143	89	158	138	17	119	101	119
	ENSMUSG00000002413.16	Braf	-0.180197	6.3517	3.06889	0.0863161	0.565763	453	785	585	527	637	408	696.81	642	105	581	648.8	664
	ENSMUSG00000002416.14	Ndufb2	0.0766702	4.03047	0.342036	0.561449	0.898119	122	160	102	107	127	118	136.19	113	16	115	116.2	117
	ENSMUSG00000002428.13	Hltf	-0.173667	4.90466	2.04715	0.159096	0.662338	192	258	223	180	242	216	233	222	42	222.97	286	289
	ENSMUSG00000002455.15	Prpf6	0.138753	5.62504	1.79088	0.187247	0.662338	368	400	313	307	351	345	329	300	58	272	348	351
	ENSMUSG00000002458.14	Rgs19	-0.359202	4.94119	6.21055	0.0170882	0.323214	146	209	170	115	190	158	200	208	45	150	228	258
	ENSMUSG00000002459.18	Rgs20	0.182432	2.68559	1.03211	0.314857	0.719764	49	79	74	81	85	69	73	65	8	69	60	64
	ENSMUSG00000002475.17	Abhd3	-0.398695	0.944143	1.5655	0.217044	0.662338	10	14	4	12	8	4	9	13	2	11	9	15
	ENSMUSG00000002477.6	Snrpd1	-0.211666	3.93278	1.37487	0.248861	0.662338	65	113	107	75	97	68	98	92	13	83	133	114.97
	ENSMUSG00000002486.16	Tchp	-0.0380396	3.40211	0.0665349	0.797575	1	65	73	54	64	59	55	69	67	10	61	55	70
	ENSMUSG00000002489.17	Tiam1	0.0645672	8.06007	0.507533	0.479725	0.849793	1912	2462	2288	2392	2349	1897	2435	2260	385	1918	2126	1991
	ENSMUSG00000002496.11	Tsc2	0.00260252	6.27981	0.000896416	0.976241	1	507.54	684.84	516.68	565.71	561	477.48	583.67	573.1	100.91	501.66	569.85	542.35
	ENSMUSG00000002500.16	Rpl3l	0.761655	4.50675	14.3665	0.000888683	0.0690761	212	215	99	212	204	144	140	115	10	98	88	119
	ENSMUSG00000002504.16	Slc9a3r2	0.402026	3.74047	7.33697	0.0093889	0.243786	104	94	81	97	69	83	78	65	13	56	70	68
	ENSMUSG00000002524.18	Puf60	0.0683174	6.06986	0.499283	0.483298	0.852363	460	573	376	431	491	419	492	417	84	337	492	456
	ENSMUSG00000002546.18	Golga2	0.0706345	6.28227	0.544739	0.464139	0.847393	521	657	541	604	569	435	532	566	101	507	497	529
	ENSMUSG00000002550.17	Uck1	0.0968601	4.18097	0.684773	0.412123	0.802464	123.74	154.33	114.8	125	126.33	111	120	118.84	17.76	108.87	127.79	125.83
	ENSMUSG00000002565.17	Scin	0.036507	4.8152	0.10856	0.743251	0.98307	168	250	181	239	247	187	191	209	48	217	184	199
	ENSMUSG00000002578.19	Ikzf4	-0.017128	2.78353	0.0117954	0.913976	1	52	68	63	54	54	45	59	66	11	47	54	57
	ENSMUSG00000002580.8	Mien1	0.197124	3.8038	1.90331	0.174226	0.662338	105	109	93	91	101	123	94	88	14	71	111	104
	ENSMUSG00000002588.14	Pon1	1.5891	-0.857907	5.22281	0.0268407	0.392444	5	4	3	1	3	3	1	1	0	2	0	1
	ENSMUSG00000002602.17	Axl	0.178579	8.24842	4.13383	0.0476937	0.487385	1871	2212	1911	1600	2120	1753	1780	1610	327	1480	1787	1799
	ENSMUSG00000002603.16	Tgfb1	-0.400454	6.46064	14.074	0.000481416	0.0498186	375	601	460	335	506	354	570	572	125	407	654	615
	ENSMUSG00000002608.9	Ccdc97	-0.0192161	5.75903	0.0325687	0.85756	1	303	398	308	274	337	293	340	329	62	241	383	328
	ENSMUSG00000002617.15	Zfp40	-0.173371	2.83054	0.907223	0.345717	0.750783	49	77	45	44	49	41	61	52	9	52	55	69
	ENSMUSG00000002625.11	Akap8l	0.101843	5.41856	0.687314	0.411263	0.801871	311	382	271	316	293	205	275	260	49	247	319	286
	ENSMUSG00000002633.5	Shh	0.454696	-1.39805	0.26728	0.612654	0.928719	1	1	0	0	1	2	1	0	0	1	0	1
	ENSMUSG00000002635.12	Pdcd2l	0.188782	3.33712	1.5256	0.222903	0.662338	55	81	57	57	77	61	59	58	11	46	59	61
	ENSMUSG00000002658.10	Gtf2f1	-0.0672878	5.0674	0.256318	0.615052	0.930198	174	238	188	141	210	181	193	194	43	147	229	212
	ENSMUSG00000002660.9	Clpp	0.311985	3.34652	3.80607	0.0570333	0.507022	62	78	66	63	85	86	61	58	6	58	65	67
	ENSMUSG00000002661.15	Alkbh7	-0.0685028	1.81262	0.0459304	0.831663	1	21	28	18	25	21	26	16	22	4	26	20	39
	ENSMUSG00000002664.3	Pspn	1.12501	-1.59455	1.55894	0.264342	0.662338	0	1	0	0	0	0	0	0	0	0	0	0
	ENSMUSG00000002668.9	Dennd1c	-0.493745	4.84367	13.6276	0.000578207	0.0534525	132	212	164	73	159	97	192	185	45	139	222	210
	ENSMUSG00000002679.15	Med6	-0.150906	3.16257	0.907622	0.345612	0.750777	50	75	57	69	50	54	77	80	9	60	70	50
	ENSMUSG00000002688.9	Prkd1	0.237035	2.28252	1.3869	0.244848	0.662338	29	43	22	34	30	19	28	27	4	26	25	19
	ENSMUSG00000002699.14	Lcp2	-0.661892	6.24413	21.2901	7.58698e-05	0.0165385	312	538	430	190	467	308	638	585	119	398	619	669
	ENSMUSG00000002718.15	Cse1l	-0.137117	5.90418	1.3675	0.248129	0.662338	366	636	395	383	492	385	478	406	109	457	519	484
	ENSMUSG00000002728.15	Naa20	-0.123103	5.17015	0.808663	0.374042	0.773462	172.39	270.33	320.21	184.89	306.18	192.27	272.06	265.22	43	236.92	306.38	249.36
	ENSMUSG00000002731.7	Prkra	0.0340637	2.90509	0.0335955	0.855357	1	49	108	61	60	51	35	61	54	10	48	71	60
	ENSMUSG00000002732.15	Fkbp7	0.191285	2.83668	1.10276	0.299022	0.701807	58	59	43	45	54	35	43	53	8	39	46	33
	ENSMUSG00000002733.9	Plekha3	-0.0761756	4.58564	0.430507	0.514934	0.872899	151	207	176	124	160	137	179	146	35	137	185	184
	ENSMUSG00000002741.10	Ykt6	0.0732018	6.67742	0.459002	0.501407	0.8632	632	732	583	656	623	608	683	568	121	519	645	632
	ENSMUSG00000002748.8	Baz1b	-0.0542361	7.61349	0.32922	0.56885	0.903111	1202	1538	1214	1019	1109	1086	1295	1217	243	983	1347	1362
	ENSMUSG00000002763.17	Pex6	0.220784	4.66016	0.926146	0.347055	0.751343	208	180	142	159	159	229	136	139	39	112	187	189
	ENSMUSG00000002767.14	Mrpl2	0.168535	4.3127	1.26764	0.265916	0.664437	109	117	105	98	162	142	102	93	26	86	136	120
	ENSMUSG00000002768.9	Mea1	0.0547232	4.53169	0.112443	0.739445	0.980805	135	177.02	151.06	133	154.17	118	148.12	130.12	30	101.13	153.05	157
	ENSMUSG00000002769.10	Gnmt	0.793074	-0.312608	1.78182	0.188837	0.662338	3	13	2	8	6	2	1	2	1	5	2	5
	ENSMUSG00000002771.13	Grin2d	0.660075	2.1491	8.44479	0.00556396	0.185978	33	47.4	30.67	30.35	31.67	57.36	28.57	24.06	2.14	22.69	23.33	28.79
	ENSMUSG00000002778.15	Kdelr1	-0.125532	5.39756	0.818166	0.372012	0.77323	256	421	323	304	357	232	361	327	60	317	341	377
	ENSMUSG00000002781.20	Tmem143	0.0136798	3.22767	0.00856998	0.926635	1	63	86	58	60	66	62	76	52	12	64	74	61
	ENSMUSG00000002791.18	Pdxk-ps	0.489773	-1.47924	0.216207	0.646778	0.931721	0	2	0	0	0	0	1	0	0	0	0	0
	ENSMUSG00000002797.10	Ggct	-0.078909	5.71389	0.352965	0.556346	0.894816	511	624	480	642	495	472	590	579	130	468	562	572
	ENSMUSG00000002799.7	Jag2	0.204725	6.49024	3.45317	0.0693897	0.548931	738	862	677	801	731	621	717	643	115	600	603	680
	ENSMUSG00000002803.15	Btbd6	0.230556	4.27594	2.56808	0.115729	0.603001	141	206	116	156	159	131	136	115	23	113	140	144
	ENSMUSG00000002804.5	Nudt14	-0.208855	2.37883	1.20381	0.278143	0.678724	27	40	21	33	29	31	30	37	9	27	40	36
	ENSMUSG00000002808.8	Epdr1	0.349716	4.64739	6.7635	0.0123936	0.282292	189	220	129	181	214	149	139	128	30	141	133	155
	ENSMUSG00000002812.5	Flii	-0.0268581	7.31805	0.0915179	0.763589	0.99317	893	1277	1023	828	972	940	1070	946	204	810	1133	1044
	ENSMUSG00000002814.16	Top3a	0.185254	4.25158	2.254	0.139948	0.649536	109	128	115	88	134	103	125	96	12	87	100	107
	ENSMUSG00000002820.7	Atg4d	0.10347	5.23745	1.16528	0.285872	0.688044	232.66	344.14	281.22	257.17	290.93	221.61	247.78	255.51	48.08	248.08	266.45	235.89
	ENSMUSG00000002825.9	Qtrt1	0.342499	3.05043	3.51569	0.0670011	0.543455	44	68	54	47	57	64	39	43	11	38	52	43
	ENSMUSG00000002831.15	Plin4	0.603845	7.15623	12.4664	0.00191029	0.102578	1383	1099	831	1154	1117	1019	969	694	131	663	729	658
	ENSMUSG00000002833.12	Hdgfl2	0.286167	5.19385	4.85884	0.032429	0.414624	257	231	194	195	229	237	188	185	32	189	195	179
	ENSMUSG00000002835.10	Chaf1a	0.0551474	5.19596	0.0870613	0.770586	0.99691	211.37	231.17	176.61	171.14	229.14	213.62	209.93	220.39	32.07	144.9	192.88	248.86
	ENSMUSG00000002844.10	Adprh	-0.116794	5.54812	0.822912	0.369454	0.770814	220	305	254	199	286	253	288	257	62	210	284	307
	ENSMUSG00000002845.15	Tmem39a	0.0656071	4.46553	0.329011	0.568972	0.903175	157.95	184	148	129	157	128	149	131	25	120	198	130.58
	ENSMUSG00000002846.10	Timmdc1	-0.0382908	3.31691	0.0586172	0.809747	1	57	71	59	55	85	64	63	72	13	53	80	67
	ENSMUSG00000002847.8	Pla1a	0.41604	3.44698	4.19133	0.0484452	0.490468	107	119	91	79	60	83	82	42	19	72	79	49
	ENSMUSG00000002870.9	Mcm2	-0.0965149	5.4772	0.761211	0.387378	0.781048	208	309	239	214	254	283	275	255	55	238	279	292
	ENSMUSG00000002871.15	Tpra1	-0.000466327	4.59788	8.99053e-06	0.997625	1	200	211	168	189	179	169	203	183	37	164	182	201
	ENSMUSG00000002881.15	Nab1	-0.115767	6.65278	1.44087	0.236004	0.662338	529	930	777	576	767	619	821	783	151	621	763	756
	ENSMUSG00000002885.15	Adgre5	-0.252301	6.29498	4.62822	0.0369503	0.435608	395.27	579.19	516.76	417.67	545.16	344.72	614.7	542.06	89.6	503.37	535.69	628.2
	ENSMUSG00000002897.6	Il17ra	0.263567	6.33728	5.10739	0.028695	0.399755	514	610	543	320	704	540	497	432	81	337	510	499
	ENSMUSG00000002900.18	Lamb1	-0.0900721	6.43182	0.958399	0.332595	0.738937	482	536	406	384	493	393	486	501	83	405	512	523
	ENSMUSG00000002908.18	Kcnn1	0.514839	1.16921	2.6466	0.110447	0.599682	17	14	11	14	20	7	7	11	4	4	15	8
	ENSMUSG00000002910.12	Arrdc2	0.20091	3.73649	1.84217	0.181168	0.662338	86	114	78	115	87	76	102	74	11	78	79	81
	ENSMUSG00000002944.16	Cd36	-0.191327	6.32502	1.66905	0.207606	0.662338	487	736	561	590	531	368	713	560	108	529	578	761
	ENSMUSG00000002948.20	Map2k7	0.0643473	5.7298	0.414432	0.522852	0.876658	343	452.55	327	381.66	365.29	253.76	384	300	59	351	320	344
	ENSMUSG00000002949.16	Timm44	0.0463331	4.9321	0.161997	0.689146	0.951462	192	247	204	192	206	205	205	194	32	201	217	211
	ENSMUSG00000002957.12	Ap2a2	-0.0660963	7.2714	0.603765	0.441032	0.828327	807.88	1151.72	868.94	719	1003.91	745.9	984.86	932.93	178	743.93	960.85	972.93
	ENSMUSG00000002963.18	Pnkp	0.061832	4.44627	0.198164	0.658247	0.935616	152	141	121	107	142	114	125	116	31	97	128	140
	ENSMUSG00000002968.10	Med25	0.102729	5.58269	0.95734	0.332859	0.738937	354	434	345	371	377	297	368	335	62	306	345	346
	ENSMUSG00000002980.15	Bcam	0.125951	5.98408	1.38843	0.244591	0.662338	388	487	477	421	544	420	446	361	70	398	510	420
	ENSMUSG00000002981.11	Clptm1	-0.0734613	6.49769	0.47885	0.492343	0.857796	574	819	714	626	742	554	785	703	119	644	725	732
	ENSMUSG00000002983.18	Relb	0.0147857	5.18595	0.0157586	0.900636	1	183	229	234	149	284	199	240	215	36	146	248	225
	ENSMUSG00000002984.18	Tomm40	0.132109	5.43233	1.15907	0.287145	0.689486	260	328.73	231	246.23	300.68	302	280	255.56	49	207.88	274.73	259.81
	ENSMUSG00000002985.17	Apoe	0.148268	8.39449	1.93526	0.170724	0.662338	2599	2516	2197	2372	2488	1953	2294	2210	384	1998	2101	2184
	ENSMUSG00000002992.18	Apoc2	0.0440824	0.752572	0.0125514	0.911273	1	8	15	10	3	10	12	16	8	1	9	9	6
	ENSMUSG00000002996.18	Hbp1	0.113552	6.33535	1.29518	0.260855	0.662338	637	816.57	717.2	760.3	786.48	487.25	732.75	667.64	112.34	621.83	569.19	675.13
	ENSMUSG00000002997.16	Prkar2b	-0.17698	3.77348	1.32515	0.255483	0.662338	93	108	84	98	93	46	106	122	13	93	76	105
	ENSMUSG00000003031.15	Cdkn1b	0.047796	5.84259	0.248807	0.620239	0.931721	403	631	470	451	439	317	423	418	90	427	419	445
	ENSMUSG00000003032.9	Klf4	0.0904464	7.93925	0.616252	0.436854	0.82486	1861	2480	2381	2966	2486	1606	2476	2414	336	2192.03	2044	1983
	ENSMUSG00000003033.16	Ap1m1	-0.111953	5.32647	1.07517	0.305077	0.708521	222	305	273	198	283	187	285	246	45	225	300	279
	ENSMUSG00000003037.17	Rab8a	-0.196427	5.91132	3.64441	0.0623638	0.525584	340	518	389	326	406	341	476	434	88	345	493	451
	ENSMUSG00000003038.16	Hmgn2	-0.0639718	6.55729	0.524738	0.472412	0.849417	591.84	805.53	586.26	530.26	691.8	517.71	647.28	633.11	131.18	594.75	625.84	690.76
	ENSMUSG00000003039.10	Fam32a	0.137591	5.36458	1.85476	0.179713	0.662338	305	339	257	281	357	252	265	272	48	199	316	324
	ENSMUSG00000003051.14	Elf3	0.0438575	-0.420841	0.0067792	0.934729	1	7	1	1	3	6	3	4	4	0	4	4	2
	ENSMUSG00000003062.14	Stard3nl	0.0573519	4.97582	0.209017	0.649642	0.932216	199	255	193	135	188	165	201	160	27	125	205	245
	ENSMUSG00000003068.18	Stk11	0.133901	6.14051	1.67526	0.201869	0.662338	481.69	520.93	421.14	435.38	497.65	430.84	422.59	403.83	87	384.15	441.69	453.94
	ENSMUSG00000003070.7	Efna2	-0.0706662	0.582127	0.0473238	0.828727	1	10	10	9	6	10	8	12	9	1	5	14	8
	ENSMUSG00000003072.16	Atp5d	0.209533	5.9574	2.78403	0.103245	0.599682	524	558	392	558	546	445	446	429	86	397	447	460
	ENSMUSG00000003099.12	Ppp5c	0.0554155	5.24352	0.263065	0.61042	0.927849	276	279	227	236	285	266	260	252	42	230	277	271
	ENSMUSG00000003119.15	Cdk12	-0.0682043	6.99047	0.452481	0.504448	0.865678	719	1181	999	833	979	680.98	1048	897	154	819	1046	980
	ENSMUSG00000003123.16	Lipe	0.0263999	5.31335	0.052838	0.819192	1	315.7	317.81	318.3	311.28	262.25	241.46	309.08	284.13	48	264.34	293.36	332.35
	ENSMUSG00000003131.8	Pafah1b2	-0.0333836	6.48656	0.118686	0.731998	0.976449	521	800	577	498	673	489	623	620	115	514	626	630
	ENSMUSG00000003134.11	Tbc1d8	0.0211911	5.09219	0.0384546	0.845377	1	264.12	268.59	236.8	262.57	292.62	184.63	270.12	271.27	38.14	216.05	256	258.1
	ENSMUSG00000003135.16	Cnot11	0.0538995	4.69621	0.233509	0.631174	0.931721	174	247	179	172	229	173	203	185	25	200	167	214
	ENSMUSG00000003153.11	Slc2a3	-0.260752	3.46249	2.34781	0.132152	0.634357	72	78	47	58	42	34	77	51	14	68	70	60
	ENSMUSG00000003154.16	Foxj2	-0.0778678	5.80202	0.653565	0.422908	0.812533	342	520.98	393	357.98	403	263.98	461.95	397.96	71	352	395	399.98
	ENSMUSG00000003161.16	Sri	-0.242501	5.55621	5.03657	0.0295577	0.40462	216	386	328	242	330	231	349	307	76	299	350	350
	ENSMUSG00000003166.21	Dgcr2	0.0175699	6.51099	0.0428998	0.836807	1	608.65	758.11	599.56	639	675.44	534.39	643	656.71	124	578.18	643	599.16
	ENSMUSG00000003184.16	Irf3	0.101256	5.38459	0.309308	0.58353	0.911104	304	316	223	243	287	299	284	221	52	213	313	278
	ENSMUSG00000003190.13	Bcl2l12	0.18725	2.76385	0.91336	0.344107	0.749695	49.59	65.1	41.46	40.81	53.49	45.08	46.84	50.55	13	41.31	35.68	30.79
	ENSMUSG00000003198.11	Zfp959	0.0967035	2.74646	0.282637	0.597478	0.918934	54.59	63.01	49	60.34	68.18	47	52.78	52.99	10	49	49.69	62.55
	ENSMUSG00000003199.17	Mpnd	0.00880674	4.10701	0.00428735	0.948071	1	98	130	82	117	96	95	109	103	23	84	108	101
	ENSMUSG00000003200.11	Sh3gl1	-0.0355121	5.7996	0.141784	0.708206	0.962935	363	529	411	422	402	333	449	414	74	354	464	441
	ENSMUSG00000003206.8	Ebi3	-0.321967	1.83851	1.58254	0.2146	0.662338	18	21	18	16	21.84	12	27	20	4	22	23	19.48
	ENSMUSG00000003208.10	Yju2	0.104045	3.42539	0.423893	0.518167	0.874358	68	76	49	78	69.76	66	64.49	70.24	9	48.61	75	66.34
	ENSMUSG00000003226.8	Ranbp2	-0.0646535	8.46512	0.358983	0.551944	0.892938	2124	3049	2636	1943	2725	1915	2668	2553	471	2010	2601	2693
	ENSMUSG00000003227.5	Edar	0.0433793	0.95775	0.0183335	0.892872	1	14	17	10	12	11	6	12	9	3	9	6	19
	ENSMUSG00000003228.10	Grk5	-0.033086	4.85578	0.0889888	0.766779	0.995037	181	241	178	136	188	181	192	177	39	153	217.76	195.7
	ENSMUSG00000003233.13	Dvl3	-0.0335884	5.68856	0.110082	0.741523	0.982059	339	499	366	394	375	270	421	357	57	387	384	405
	ENSMUSG00000003234.17	Abcf3	0.0723274	5.10297	0.369649	0.546118	0.889057	245	244	200	198	178	237	211	203	30	179	239	246
	ENSMUSG00000003235.14	Eif2b5	0.184273	5.20276	2.51923	0.11916	0.611264	280	312	274	297	267	333	250	266	46	228	296	285
	ENSMUSG00000003269.18	Cyth2	0.0403157	5.04092	0.100834	0.752235	0.987381	251.32	255.74	202.91	209.79	242.82	153.89	225	218.89	41	198.76	233.28	186.88
	ENSMUSG00000003271.18	Sult2b1	0.0330594	3.7078	0.0477419	0.827985	1	110	135	150	178	139	159	154	144	32	137	146	124
	ENSMUSG00000003273.15	Car11	0.944923	0.411524	5.25107	0.0264526	0.389232	10	8	8	8	12	4	4	2	1	5	4	6
	ENSMUSG00000003279.18	Dlgap1	-0.44244	1.30042	2.06796	0.157038	0.662338	8	14	13	6	22	3	9	17	2	13	17	19
	ENSMUSG00000003282.10	Plag1	0.424912	2.89781	4.05632	0.0504575	0.49841	55	77	66	68	59	56	52	55	10	38	36	54
	ENSMUSG00000003283.16	Hck	-0.652783	6.25379	10.8903	0.00354112	0.146717	276	435	422	137	467	296	515	479	117	327	640	635
	ENSMUSG00000003299.11	Mrpl4	0.00465994	4.83725	0.00185184	0.965857	1	156	262	213	210	224	192	231	188	36	179	242	217
	ENSMUSG00000003308.16	Keap1	0.0948111	6.28412	0.812359	0.372012	0.77323	470.07	567	458.67	446.82	517.26	493.04	478.14	472.08	84.99	401.07	503.55	477.2
	ENSMUSG00000003309.15	Ap1m2	0.162208	4.07252	1.46387	0.232356	0.662338	146	201	156	181	171	152	158	151	16	165	151	160
	ENSMUSG00000003316.15	Glg1	-0.0606746	7.58317	0.52635	0.471737	0.849417	1052	1612	1122	1051	1337	999	1293	1263	226	1053	1266	1369
	ENSMUSG00000003341.10	Atp8b3	-1.2652	-1.50613	1.73267	0.215017	0.662338	0	0	0	0	0	0	0	0	0	1	0	0
	ENSMUSG00000003344.15	Btbd2	0.111971	4.5102	0.795784	0.376894	0.773462	178	224	146	191	167	107	166	156	32	157	150	138
	ENSMUSG00000003345.17	Csnk1g2	0.113503	6.25512	1.3629	0.248914	0.662338	505	605	479	477	542	442	500	490	74	422	531	470
	ENSMUSG00000003346.15	Abhd17a	0.0394521	4.98839	0.100431	0.752714	0.987823	211	230	209	204	253	210	238	198	47	179	228	215
	ENSMUSG00000003348.11	Mob3a	-0.287427	5.25915	4.85646	0.0329195	0.41696	220	313	237	180	264	182	317	294	41	226	320	300
	ENSMUSG00000003352.15	Cacnb3	-0.367464	4.29844	7.2096	0.0099819	0.253511	86	141	139	110	129	83	159	137	29	169	117	147
	ENSMUSG00000003354.7	Ccdc65	-0.424198	-1.22635	0.223286	0.638731	0.931721	0	0	0	1	2	1	2	0	0	0	2	1
	ENSMUSG00000003355.8	Fkbp11	0.219602	1.51631	0.6709	0.416865	0.806623	21	21	14	15	17	6	11	13	3	11	14	17
	ENSMUSG00000003360.16	Ddx23	0.188301	6.15094	3.49438	0.0678048	0.547232	485	573	378	435	492	447	421	388	78	337	460	463
	ENSMUSG00000003363.16	Pld3	-0.276098	5.80699	5.98089	0.0182553	0.333785	311	481	400	353	416	276	480	492	87	387	456	420
	ENSMUSG00000003378.10	Grik5	0.193988	3.415	1.63619	0.207118	0.662338	66	59	64	74	68	58	57	49	10	54	64	64
	ENSMUSG00000003379.8	Cd79a	-0.31181	1.4421	0.948934	0.33497	0.740964	23	9	11	16	13	9	15	18	6	15	18	14
	ENSMUSG00000003380.12	Rabac1	0.370123	5.70393	11.6022	0.00135682	0.0884151	391	412	313	393	395	376	330	287	53	238	322	323
	ENSMUSG00000003382.19	Etv3	-0.0159405	7.71613	0.0288044	0.865959	1	1349	1706.94	1619	1211.9	1504.96	1238.92	1631.93	1479.98	254	1240	1490	1563.95
	ENSMUSG00000003402.15	Prkcsh	-0.034659	5.30507	0.117204	0.73361	0.977367	238	303	228	218	277	224	268	228	38	234	306	269
	ENSMUSG00000003410.9	Elavl3	2.43317	-1.02929	5.97164	0.0183402	0.33379	3	3	2	0	2	0	0	0	0	0	0	1
	ENSMUSG00000003411.11	Rab3b	0.583889	-0.256246	1.41256	0.240593	0.662338	5	2	2	8	9.98	10.47	3	5	0	6	5	3
	ENSMUSG00000003418.12	St8sia6	-0.20387	1.66298	0.625742	0.432889	0.821145	22	26	17	21	18	8	31	25	4	19	13	19
	ENSMUSG00000003420.9	Fcgrt	0.246734	5.5196	3.33608	0.0756525	0.548931	346	325	187	278	292	216	232	188	44	250	228	255
	ENSMUSG00000003421.14	Nosip	-0.128415	4.84173	1.44404	0.235497	0.662338	171	223	189	167	185	152	189	205	45	174	169	230
	ENSMUSG00000003423.16	Pih1d1	0.150449	3.7118	1.12149	0.295001	0.697512	92.33	119.17	78	62.75	102.93	79.53	73.46	75	13	67.26	98.14	91.8
	ENSMUSG00000003429.12	Rps11	-0.153488	7.6664	0.413296	0.527882	0.880087	1180.93	2132.93	1729.8	1678.94	1575	910.89	1888.9	1789.99	296.85	1516.92	1794	1539.68
	ENSMUSG00000003435.10	Supt5	0.0528745	6.67097	0.325369	0.571111	0.903927	663.6	820.88	614.96	652.06	691.45	555.97	682.04	609.59	148.29	545.95	642.64	628.43
	ENSMUSG00000003436.12	Dll3	-1.23393	-1.47868	1.56828	0.243683	0.662338	0	0	0	0	1	0	0	0	0	1	1	1
	ENSMUSG00000003437.15	Paf1	0.0698678	5.1432	0.292066	0.591447	0.915671	226	262	224	174	238	234	223	214	34	179	258	236
	ENSMUSG00000003438.18	Timm50	0.0933037	4.108	0.455446	0.503061	0.864546	110	162	126	119	142	128	123	113	24	101	153	125
	ENSMUSG00000003444.9	Med29	-0.028146	3.0623	0.0338784	0.854756	1	50	64	53	45	51	46	63	55	9	38	58	52
	ENSMUSG00000003452.16	Bicd1	-0.13267	2.03277	0.292984	0.590867	0.915417	22	43	13	30	16	15	35	22	5	15	24	30
	ENSMUSG00000003458.13	Ncstn	-0.151737	6.72285	3.20892	0.0796674	0.549047	570.99	932.68	712	605	768.53	505.47	844	750.57	138	653	756.28	773.22
	ENSMUSG00000003464.14	Pex19	0.0851967	5.58533	0.805959	0.373886	0.773462	311	409	287	373	336	267	333	314	66	278	297	311
	ENSMUSG00000003469.10	Phyhip	-0.229293	4.79047	3.99329	0.0514759	0.49841	207	310	296	305	241	232	347	311	62	274	322	298
	ENSMUSG00000003476.17	Crhr2	0.911719	3.03904	18.5307	9.49403e-05	0.0185949	71	84	44	65	77	47	47	44	4	32	24	28
	ENSMUSG00000003477.6	Inmt	1.62173	2.00738	26.1559	8.4504e-06	0.00390074	48	27	16	48	26	11	12	12	0	8	7	11
	ENSMUSG00000003484.5	Cyp4f18	-0.313714	3.43884	3.04511	0.0875058	0.568578	54	59	71	41	64	58	83	57	10	54	87	92
	ENSMUSG00000003500.14	Impdh1	0.0787888	4.26876	0.405556	0.527318	0.879845	99	148	110	94	134	116	118	92	23	109	125	103
	ENSMUSG00000003505.16	Psg18	-0.118332	-1.56459	0.0131409	0.917965	1	0	0	0	0	1	0	0	0	0	0	0	1
	ENSMUSG00000003518.14	Dusp3	-0.0650397	6.12084	0.384301	0.5383	0.885907	405	528	374	368	463	283	443	425	64	360	455	473
	ENSMUSG00000003526.13	Prodh	0.317358	3.73879	3.77158	0.0581271	0.511185	73	129	89	102	117	91	105	69	16	83	69	72
	ENSMUSG00000003527.10	Ess2	-0.0488269	4.30856	0.151437	0.698921	0.957309	125	162	131	113	115	101	116	132	22	113	131	158
	ENSMUSG00000003528.16	Slc25a1	0.138426	4.86975	1.57283	0.215988	0.662338	199	230	223	200	216	180	206	192	32	181	203	178
	ENSMUSG00000003531.16	Dgcr6	0.187523	4.24891	2.01535	0.162303	0.662338	152	177	121	149	188	130	141	129	25	114	154	135
	ENSMUSG00000003534.18	Ddr1	0.174013	6.74842	3.26395	0.0772123	0.548931	806	1087	918	1018	947	778	860	828	147	816	869	764
	ENSMUSG00000003541.7	Ier3	0.225091	4.68441	3.17251	0.0813398	0.552773	187	203	198	176	251	204	216	176	34	139	188	157
	ENSMUSG00000003545.4	Fosb	0.56824	4.87591	0.846778	0.368876	0.76998	263	76	70	101	260	50	77	98	7	117	146	44
	ENSMUSG00000003546.11	Klc4	0.021156	3.26204	0.00911566	0.924498	1	65	59	48	51	48	32	55	35	10	50	58	50
	ENSMUSG00000003549.10	Ercc1	0.188339	3.70276	1.71041	0.197283	0.662338	98	130.59	98	79	124	86	96	106	14	73	98	83
	ENSMUSG00000003555.9	Cyp17a1	0.109355	1.55478	0.226286	0.636491	0.931721	24	28	36	31	43	18	36	28	5	28	29	18
	ENSMUSG00000003559.9	As3mt	-0.135065	2.61849	0.436132	0.512214	0.870694	28	48	31	30	36	19	34	26	6	34	35	46
	ENSMUSG00000003573.16	Homer3	0.198662	3.79801	1.39979	0.242699	0.662338	75.48	93.95	74.5	96.49	85.91	93.17	52.85	73.15	17.05	69.38	103.97	74.34
	ENSMUSG00000003575.14	Crtc1	-0.0198794	4.78639	0.0337641	0.854999	1	157	233	169	207	222	150	195	179	46	174	195	185
	ENSMUSG00000003581.15	Rnf215	0.217268	3.9652	1.42544	0.240541	0.662338	114	106	67	85	109	102	85	75	15	74	94	96
	ENSMUSG00000003585.14	Sec14l2	-0.0827757	3.13744	0.241714	0.625256	0.931721	66	70	62	81	61	57	77	59	22	67	79	50
	ENSMUSG00000003604.15	Aven	0.253757	3.36667	3.17014	0.0814499	0.552893	68.87	75.89	68.98	71.92	87.37	61.4	66.9	61.67	12	45	65	65.87
	ENSMUSG00000003617.17	Cp	0.12136	5.98791	0.56526	0.459393	0.843546	468	672	511	483	468	395	517	404	96	422	498	413
	ENSMUSG00000003623.5	Crot	-0.154146	4.64585	1.37017	0.247675	0.662338	135	252	185	175	205	114	204	192	48	183	163	198
	ENSMUSG00000003644.18	Rps6ka1	-0.287531	5.83431	7.42055	0.00902021	0.239253	303	490	359	278	372	298	474	440	75	316	495	427
	ENSMUSG00000003657.10	Calb2	0.307714	-1.42453	0.087657	0.774402	0.99691	0	0	0	0	1	2	0	1	0	0	1	0
	ENSMUSG00000003660.11	Snrnp200	0.0871885	7.58466	0.993258	0.324043	0.729319	1195	1618	1282	1130	1493	1313	1357	1256	219	1084	1330	1395
	ENSMUSG00000003662.11	Ciao1	0.025275	4.40069	0.0517731	0.820992	1	136	192	123	149	169	117	154	130	25	141	153	150
	ENSMUSG00000003665.8	Has1	0.804937	3.88454	29.0396	2.22492e-06	0.00190222	125	97	107	100	124	117	78	53	10	64	79	55
	ENSMUSG00000003680.17	Taf6l	-0.136836	3.69721	0.883423	0.352064	0.75578	80	75	76	78	84	76.41	83.42	79	19	69	92	106
	ENSMUSG00000003721.15	Insig2	0.0256689	5.37373	0.0614455	0.805304	1	299	372	282	327	368	287	330	297	67	270	327	342
	ENSMUSG00000003731.14	Kpna6	-0.0361032	6.48125	0.16867	0.68316	0.948969	638	839	611	673	681	535	712	699	136	586	682	685
	ENSMUSG00000003746.17	Man1a	0.117397	6.7362	1.70225	0.198336	0.662338	735	925	665	730	773	547	826	635	110	638	635	688
	ENSMUSG00000003752.10	Itpkc	0.252847	5.84446	4.69472	0.0353494	0.428974	483.18	572.33	497.79	535.35	534.17	447.09	479.2	457.39	90.07	345.79	456.21	391.93
	ENSMUSG00000003762.14	Coq8b	0.151812	4.55028	1.14781	0.289469	0.691816	140.26	179.37	148.95	107.83	160.32	163.99	151.89	146.98	21	105.4	128.66	161.29
	ENSMUSG00000003778.15	Brd8	-0.0148564	6.04786	0.0232088	0.879566	1	431	571	446	412	513	384	486	462	92	411	466	476
	ENSMUSG00000003779.17	Kif20a	-0.270103	4.55614	5.1556	0.0277889	0.397917	99.73	190.03	142.72	119.81	168.66	137.6	183.39	177.96	30.99	147.26	174.41	181.41
	ENSMUSG00000003808.19	Farsa	0.104227	5.28239	1.00234	0.321864	0.72753	233	294	247	200	273	230	219	227	41	211	257	240
	ENSMUSG00000003809.15	Gcdh	0.172518	3.47821	1.48052	0.229758	0.662338	79	85	72	78	78	92	73	79	14	57	69	84
	ENSMUSG00000003810.14	Mast2	0.0887412	6.7329	0.979447	0.327395	0.733471	761	859	594	698	786	630	730	679	134	627	679	660
	ENSMUSG00000003812.14	Dnase2a	-0.0723161	5.37974	0.386176	0.537314	0.885485	344.21	431.27	350.2	366.98	328.84	253.73	356.43	396.81	70.36	334.75	342.14	377.46
	ENSMUSG00000003813.16	Rad23a	0.169167	5.30336	2.26013	0.139422	0.649027	295.11	294.26	235.08	254.66	271.22	244.26	228.54	236.32	32.32	220	269.77	276.44
	ENSMUSG00000003814.9	Calr	-0.303917	8.81704	8.68593	0.00497557	0.178264	2382	3402	2745	1832	2826	2692	3100	2985	672	2450	4050	3589
	ENSMUSG00000003824.13	Syce2	0.258189	1.70884	0.989956	0.32484	0.730237	27	24	17	25	18	20	21	17	4	17	19	17
	ENSMUSG00000003847.17	Nfat5	-0.163833	8.23377	1.93219	0.172225	0.662338	1946	3236	2540	2462	2503	1566	2853	2597	502	2524	2531	2622
	ENSMUSG00000003848.15	Nob1	0.251893	4.64919	4.56164	0.0379265	0.44106	177	194	137	180	205	161	176	153	26	106	174	141
	ENSMUSG00000003849.9	Nqo1	0.302514	2.62496	2.2928	0.13666	0.643872	41	47	52	33	53	36	38	28	4	29	50	38
	ENSMUSG00000003863.19	Ppfia3	0.0824576	4.6269	0.458002	0.501871	0.863399	255	294	247	326	280	236	287	270	41	249	277	240
	ENSMUSG00000003865.17	Gys1	0.459063	5.72764	9.9835	0.00359163	0.148101	389.47	529.06	291.93	527.17	475.99	294.05	404.39	268.52	46.44	299.17	292.29	284.8
	ENSMUSG00000003868.15	Ruvbl2	0.130224	4.49668	0.984685	0.326118	0.731932	143.53	164.94	125.07	117.83	142.01	157.95	150.61	130.48	25.56	108.83	134.71	128.2
	ENSMUSG00000003872.10	Lin7b	-0.540955	-0.139099	1.74929	0.192355	0.662338	3	4.54	5	4.33	7	5.4	8.33	8.64	1	8	4.38	7
	ENSMUSG00000003873.12	Bax	-0.0687747	4.86593	0.0706284	0.793203	1	122	162	103.93	92	192	148	131	118	25.77	129	174.98	168
	ENSMUSG00000003882.6	Il7r	-0.70094	5.35253	11.8987	0.00243258	0.120489	176	298	264	91	228	170	320	350	54	230	387	397
	ENSMUSG00000003923.15	Tfam	0.166837	4.42339	1.79546	0.186695	0.662338	133	171	126	143	186	175	141	145	23	136	141	143
	ENSMUSG00000003929.12	Zfp81	-0.110675	3.52398	0.549853	0.462061	0.845961	80	119	96	82	89	61	114	89	22	76	90	93
	ENSMUSG00000003934.6	Efnb3	0.455752	0.559554	1.16593	0.285739	0.687945	13	6	9	8	8	3	5	11	0	4	5	5
	ENSMUSG00000003948.18	Mmd	-0.0648811	4.50944	0.244588	0.623212	0.931721	153.13	237.13	245.62	237.31	214.28	137	236.07	227.32	40	214.2	185.91	198.54
	ENSMUSG00000003949.17	Hlf	0.00478693	6.09669	0.000640205	0.980059	1	526	847	651	748	648	287	772	593	107	663	473	553
	ENSMUSG00000003955.9	Fam162a	0.112612	4.30452	0.748902	0.391213	0.784201	150	214	110	170	191.91	182	175	154	26	139	188	142
	ENSMUSG00000003970.10	Rpl8	0.274373	8.65339	6.85808	0.0118348	0.276922	2938	3211	2529	2777	3323	3192	2601	2528	440	2223	2769	2571
	ENSMUSG00000003974.7	Grm3	0	-1.62443	0	1	1	0	0	0	0	0	0	0	0	0	0	0	0
	ENSMUSG00000003992.16	Ssbp2	-0.00200603	4.90802	0.000236656	0.987791	1	212.82	287.5	267.68	226.56	266.54	180.38	272.9	258.34	51	188.65	245.72	219.1
	ENSMUSG00000004018.10	Fancl	-0.267432	2.42153	2.06347	0.157479	0.662338	36.55	52.04	32.03	21.78	42.88	27.37	40.66	46.29	7.88	38.43	49.98	36.1
	ENSMUSG00000004031.14	Brinp2	-0.602748	-1.07092	0.474088	0.494492	0.858982	2	2	0	1	0	0	4	1	0	1	1	0
	ENSMUSG00000004032.11	Gstm5	0.15125	3.43071	0.967212	0.330404	0.736317	75	99.91	69.87	100.97	87	59.93	80.72	77	15	73	61	74
	ENSMUSG00000004035.13	Gstm7	0.335618	-0.0690416	0.53416	0.468485	0.849417	6	7	4	3	6	1	4	3	1	4	3	3
	ENSMUSG00000004038.10	Gstm3	-0.119896	-1.53248	0.0151298	0.902752	1	1.03	0	0	0	0	1.02	0	0	0	1	1.02	0
	ENSMUSG00000004040.17	Stat3	0.119015	8.4328	1.6611	0.203752	0.662338	2119	2715	2529	1882	2809	2113	2486	2132	389	1793	2487	2134
	ENSMUSG00000004043.15	Stat5a	0.0515683	5.99579	0.25477	0.616091	0.930737	389.39	541.53	466.35	321	500.42	362.13	408.84	417.8	87.43	332.38	483.24	394.94
	ENSMUSG00000004044.10	Cavin1	0.234268	8.50329	4.27827	0.0443301	0.472519	2426	2679	1809	2131	2225	2156	1891	1912	369	1702	1891	2149
	ENSMUSG00000004054.10	Map3k11	-0.00359739	6.28602	0.000457009	0.983131	1	509.42	588	402.49	420	515	431.97	475	481	100	374.96	539	500.86
	ENSMUSG00000004056.16	Akt2	0.108708	6.86143	1.27394	0.264747	0.662939	743.34	1049.44	809.47	809.05	826.93	554.63	764.88	749.75	143.62	654.78	769.36	723.18
	ENSMUSG00000004069.18	Dnaja3	0.189275	5.17126	3.23171	0.0786404	0.548931	251	316	228	256	269	220	275	193	34	198	274	217.05
	ENSMUSG00000004070.16	Hmox2	-0.184705	5.62451	1.73996	0.196084	0.662338	276.41	343.01	230.95	211.5	318.19	234.5	311	292	63.97	221.43	339.58	347.36
	ENSMUSG00000004071.14	Cdip1	-0.0203869	5.84015	0.0469913	0.829321	1	362.75	555.1	373.05	384.13	422.92	267.77	436.37	393	69.03	360.57	388.42	422.64
	ENSMUSG00000004085.15	Map3k20	0.21595	8.11385	4.05241	0.0498465	0.4964	1986	2855	1784	2385	2332	1784	2211	1903	323	1733	1863	1831
	ENSMUSG00000004096.10	Cwc15	-0.214077	4.76929	3.16535	0.0816728	0.553506	136	198	176	159	188	100	182	197	40	161	171	191
	ENSMUSG00000004098.8	Col5a3	0.311319	5.77087	6.33882	0.0154314	0.309226	332	445	305	305	303	286	267	249	55	220	299	278
	ENSMUSG00000004099.17	Dnmt1	-0.212434	7.0231	5.309	0.0256755	0.384488	710	985	797	687	844	773	924	927	199	728	998	975
	ENSMUSG00000004100.13	Ppan	0.233064	4.72563	4.01238	0.0509435	0.49841	231	204	197	214	198	206	197.22	180	29	160	202.22	175
	ENSMUSG00000004105.9	Angptl2	-0.0169344	6.8683	0.0206502	0.886436	1	633	953	636	892	727	400	801	692	123	721	607	755
	ENSMUSG00000004110.18	Cacna1e	0.10415	3.79201	0.509163	0.479024	0.849454	105	129	90	94	109	71	120	96	8	99	80	89
	ENSMUSG00000004113.19	Cacna1b	-0.36168	0.658951	0.993586	0.323964	0.729319	3	9	8	5	7	3	9	9	1	5	10	5
	ENSMUSG00000004127.13	Trmt10a	0.077815	2.79419	0.196382	0.659687	0.936502	53	83	58.62	59	77	61	67	73	7	46	63.87	70.56
	ENSMUSG00000004151.18	Etv1	0.0313019	3.33557	0.0297162	0.863875	1	65.49	106.97	57.5	71.68	65.52	43.2	86.5	54.41	7.5	65.29	71.16	65.29
	ENSMUSG00000004187.12	Kifc2	0.276247	1.65685	1.31297	0.257649	0.662338	35	28	21	23	21	18	19.05	17	4	24	22	18
	ENSMUSG00000004207.15	Psap	-0.457384	10.5695	10.9819	0.0023794	0.119002	6405	8609	6970	4703	7949	5735	8718	8392	1873	6804	10038	11602
	ENSMUSG00000004221.17	Ikbkg	-0.0128036	5.80899	0.016454	0.898479	1	309	453.19	388.22	369	415.88	329.98	349	367	92	357.81	353.27	400.4
	ENSMUSG00000004231.16	Pax2	1.77564	-1.59372	2.88836	0.114445	0.599682	0	0	1	1	0	0	0	0	0	0	0	0
	ENSMUSG00000004233.15	Wars2	-0.190061	3.0518	1.22914	0.273206	0.673486	37	80	55	48	52	47	66	62	16	59	51	52
	ENSMUSG00000004263.16	Atn1	-0.0853138	6.299	0.660954	0.420316	0.809788	433	699	532	496	529.55	393	665	526.79	84.35	532	536.17	517
	ENSMUSG00000004264.18	Phb2	0.169921	6.42705	2.67565	0.108563	0.599682	590.74	696.49	515.89	549.29	660.27	646.65	579.92	514.25	100	475.06	617.31	564.08
	ENSMUSG00000004266.16	Ptpn6	-0.491437	6.54515	12.3436	0.00147768	0.091969	438.57	656.52	607.63	268.6	563.4	369.38	651.43	611.79	135.78	438.82	830.07	832.09
	ENSMUSG00000004267.17	Eno2	-0.150702	2.39902	0.547251	0.463116	0.846829	27	46	24	24	27	24	34	33	3	26	33	38
	ENSMUSG00000004268.12	Emg1	0.0674987	5.54918	0.399646	0.530331	0.882055	307.84	322.31	280.42	251.75	371.92	310.02	305.07	282.32	49.7	244.28	327.66	343.34
	ENSMUSG00000004270.14	Lpcat3	-0.0829278	5.37554	0.474574	0.494272	0.858764	253.16	363.69	313.58	294.25	297.08	200.98	318.93	289.68	68.3	294.72	301.34	267.66
	ENSMUSG00000004285.13	Atp6v1f	-0.0387883	5.06692	0.124689	0.72558	0.97256	209	278.93	195	198.96	248	217.98	248	237	36	196.99	250	250
	ENSMUSG00000004296.15	Il12b	0.040911	-0.407842	0.00405887	0.949471	1	1	1	6	0	2	2	0	2	1	1	2	4
	ENSMUSG00000004317.15	Clcn5	-0.117979	5.56798	1.51561	0.224399	0.662338	252	432	343	283	367	264	361	345	52	315	410	363
	ENSMUSG00000004319.16	Clcn3	0.0385068	6.43478	0.152263	0.698142	0.956658	615	849.11	676	753	754	571.05	799	666	107	679	666	700
	ENSMUSG00000004328.16	Hif3a	1.54106	0.862304	13.9486	0.000506749	0.0506267	12	18	10	20	8	5	5	2	1	6	2	5
	ENSMUSG00000004347.18	Pde1c	-0.0310168	1.73969	0.0166496	0.897881	1	28	30	17	25	17	16	26	25	3	17	17	31
	ENSMUSG00000004356.9	Utp20	0.0913635	6.0154	0.89942	0.34778	0.751933	380	603	477	470	495	496	466	466	77	405	514	480
	ENSMUSG00000004359.17	Spic	-0.861411	0.90596	6.03534	0.017764	0.328966	4	4	17	7	7	3	14	11	4	10	17	10
	ENSMUSG00000004360.10	9330159F19Rik	0.3291	2.95429	1.08167	0.310138	0.714383	61	87	27	94	71	31	71	59	4	48	24	52
	ENSMUSG00000004364.15	Cul3	-0.0624222	6.6465	0.261714	0.611974	0.928379	658	1101	843	792	884	598	958	816	152	777	851	836
	ENSMUSG00000004371.16	Il11	0.132517	-0.371935	0.0586966	0.80962	1	2	4	5	3	3	2	3	3	0	4	3	2
	ENSMUSG00000004383.19	Large1	0.252011	5.02076	4.83904	0.032767	0.416312	235	276	183	248	265	200	207	167	47	171	209	204
	ENSMUSG00000004393.11	Ddx56	0.169641	4.78971	1.79277	0.187019	0.662338	169	210	185	183	188	245	159	178	37	153	196	191
	ENSMUSG00000004394.13	Tmed4	0.20384	4.99843	2.08521	0.156382	0.662338	178	232	152	214	234	167	194	160	32	156	172	170
	ENSMUSG00000004415.16	Col26a1	2.80992	-0.7183	7.8105	0.00749214	0.217178	2	1	2	6	2	0	0	0	0	0	1	0
	ENSMUSG00000004446.13	Bid	-0.3323	4.41934	5.0071	0.0302171	0.408288	105	163.3	149.11	70	142	88	142	158	34	115.82	151	164.1
	ENSMUSG00000004451.15	Ralb	-0.157726	5.84392	2.71256	0.106221	0.599682	306	409	350	292	354	274	391	360	76	297	379	399
	ENSMUSG00000004455.17	Ppp1cc	-0.0140571	6.88298	0.0252422	0.874445	1	740.94	978.6	770.12	719.04	877.35	720.23	917.87	763.53	151.8	736.61	798.53	840.37
	ENSMUSG00000004460.18	Dnajb11	-0.215197	6.02987	1.73347	0.200264	0.662338	299	427	316	258	359	332	385	341	82	301	459	416
	ENSMUSG00000004462.8	Tbccd1	-0.0401354	4.03431	0.0757359	0.784366	1	96	134	132	116	114	109	103	118	31	113	125	121
	ENSMUSG00000004473.11	Clec11a	0.211734	3.14592	1.31584	0.257136	0.662338	47	62	47	62	42	49	60	46	11	35	42	36
	ENSMUSG00000004500.10	Zfp324	0.0599297	3.96017	0.203806	0.653739	0.933909	124	158	112	110	112	108	120	122	29	86	117	117
	ENSMUSG00000004508.7	Gab2	-0.2678	6.13469	7.24645	0.00980636	0.250521	270	452	354	261	394	229	435	400	69	327	393	408
	ENSMUSG00000004530.13	Coro1c	-0.168496	7.7404	3.22168	0.0790905	0.548931	1036	1624	1193	1130	1215	1011.16	1447	1325	257	1152	1364	1434.96
	ENSMUSG00000004535.13	Tax1bp1	-0.133864	8.00211	1.11906	0.297674	0.700651	1464	2426	2308	1328	2206.92	1436	2122	1960	410	1641	2262	2035
	ENSMUSG00000004540.8	Psg17	-0.149821	-1.20195	0.0213059	0.884572	1	1	0	0	0	1	0	1	0	0	1	0	0
	ENSMUSG00000004542.16	Psg19	-0.109724	-1.50664	0.0109701	0.917965	1	0	0	1	0	0	0	0	0	0	0	0	1
	ENSMUSG00000004552.17	Ctse	0.204069	1.40459	0.357316	0.552865	0.893362	14	17	14	7	20	4	10	15	1	5	11	15
	ENSMUSG00000004558.16	Ndrg2	0.616994	7.22534	10.1308	0.00467201	0.172303	1248	1457	714	1342	1253	934	1023	714	102	771	741	695
	ENSMUSG00000004561.15	Mettl17	0.0878005	3.53793	0.375866	0.542775	0.887166	91	110	80	80	86	61	92	70	18	66	83	80
	ENSMUSG00000004562.17	Arhgef40	0.234767	5.42262	4.71816	0.0349154	0.426437	279.95	350.88	210.33	246.09	262.13	241	232	212	45	215	233.77	225
	ENSMUSG00000004565.16	Pnpla6	0.00481686	4.94472	0.00233777	0.961641	1	209	293	214	236	221	156	222	209	40	210	237	224
	ENSMUSG00000004567.17	Mcoln1	-0.0391612	5.39914	0.118046	0.732693	0.976824	253	392	294	279	299	182	304	292	51	248	290	320
	ENSMUSG00000004568.14	Arhgef18	0.00105728	5.9241	0.000132232	0.990874	1	451	586	443	459	436	372	530	449	84	431	432	454
	ENSMUSG00000004591.17	Pkn2	-0.0508536	6.53909	0.30947	0.58064	0.909294	585	847	611	576	718	580	729	644	117	578	719	755
	ENSMUSG00000004609.12	Cd33	0.276095	3.94771	2.9303	0.0935129	0.585186	105	133	104	123	109	63	115	89	16	86	79	68
	ENSMUSG00000004610.5	Etfb	0.442335	5.00855	9.6293	0.0034826	0.145284	203.99	184.58	163.8	180	228.38	229	170	136.14	27	137	146.65	154
	ENSMUSG00000004612.10	Nkg7	-0.57403	4.10948	4.05498	0.0578293	0.50986	59	119	62	21	105	73	103	111	22	89	112	118
	ENSMUSG00000004626.15	Stxbp2	-0.16841	5.54005	2.22959	0.142062	0.652557	247	348	272	260	299	257	340	293	49	260	360	367
	ENSMUSG00000004630.19	Pcp2	-0.714691	-0.470011	0.936759	0.340297	0.746274	0	7.64	1.71	0	5.85	0	1	2.65	0	10.02	1.29	6.27
	ENSMUSG00000004631.16	Sgce	0.328819	3.76363	4.56737	0.0378115	0.440176	94	132	89	98	114	40	83	62	14	69	74	83
	ENSMUSG00000004633.18	Chn2	-0.142895	2.6424	0.572209	0.453152	0.838347	37.87	43.81	45.42	28.89	28	40.65	39	44.87	10.21	38.78	46.85	33.82
	ENSMUSG00000004637.16	Wwox	0.069038	3.81046	0.253501	0.694053	0.954427	86	117	93	85	101	87	95	102	10	79	90	104
	ENSMUSG00000004642.14	Slbp	-0.149823	4.74777	1.67708	0.201628	0.662338	135	212	188	139.72	187.85	184.98	205.3	178	44	148	205.48	216.84
	ENSMUSG00000004651.7	Tyr	-0.268538	-0.357888	0.280781	0.59868	0.919925	4	4	2	3	3	2	2	5	0	5	5	2
	ENSMUSG00000004654.7	Ghrhr	1.13454	-1.59371	1.52211	0.264342	0.662338	0	0	0	0	1	0	0	0	0	0	0	0
	ENSMUSG00000004655.6	Aqp1	0.145936	7.60373	2.35364	0.131684	0.633163	1044	1358	1013	1059	1193	1081	1128	991	190	938	916	1143
	ENSMUSG00000004661.16	Arid3b	-0.305095	3.84423	4.07152	0.0493319	0.49456	63	113.81	84.04	40	79.82	50.85	97.56	82.29	15	61	92	112
	ENSMUSG00000004665.11	Cnn2	-0.333523	6.3915	10.2383	0.00246326	0.120955	386	637	422	364	495	384	544	565	104	396	695	623
	ENSMUSG00000004667.19	Polr2e	0.0520588	4.59008	0.192427	0.662911	0.938255	172	202	156	171	178	127	161	169	34	142	162	164
	ENSMUSG00000004668.15	Abca13	0.195479	1.66076	0.129873	0.722197	0.970395	27	5	12	14	11	6	7	11	4	18	8	8
	ENSMUSG00000004677.18	Myo9b	-0.215422	7.54149	5.4211	0.0242406	0.377344	1004	1382	1059	858	1212	861	1201	1197	244	990	1363	1348
	ENSMUSG00000004698.12	Hdac9	-0.0990928	3.44117	0.370265	0.545785	0.888829	52	95	67	54	80	42	79	82	13	46	60	78
	ENSMUSG00000004707.15	Ly9	-0.815054	4.46062	33.2259	6.08082e-07	0.000878349	98	118	110	49	119	70	160	161	36	111	183	198
	ENSMUSG00000004709.15	Cd244a	-0.283497	4.64537	4.59926	0.0371779	0.435608	105	207	166	79	187	120	165	174	38	136	180	197
	ENSMUSG00000004730.16	Adgre1	-0.858932	6.74432	42.0817	2.63181e-07	0.000559695	400	755	480	315	517	271	821	775	160	552	831	1064
	ENSMUSG00000004748.6	Mtfp1	0.726918	0.481626	2.79893	0.100961	0.599682	7	9	3	6	8	13	10	4	1	4	2	3
	ENSMUSG00000004768.15	Rab23	0.11173	4.51518	0.78607	0.379798	0.774663	159	205	168	106	158	125	155	135	24	151	157	115
	ENSMUSG00000004771.13	Rab11a	-0.0432945	6.53287	0.233409	0.631247	0.931721	639	920.34	739	699	813	618	824	771	133	685.11	795	765
	ENSMUSG00000004788.12	Eif2b2	0.0304283	4.62216	0.0576954	0.811219	1	131	189	151	157	153	133	165	148	30	123	135	172
	ENSMUSG00000004789.11	Dlst	-0.00567325	6.86315	0.00450333	0.946781	1	723	922	729	720	764	614	801	712	140	682	769	786
	ENSMUSG00000004791.8	Pgf	-0.353696	1.47475	1.55714	0.218256	0.662338	12	13	19	9	13	13	18	13	6	15	25	9
	ENSMUSG00000004798.15	Ulk2	0.0281859	5.43221	0.0652578	0.799484	1	305	408	278	301	341	242	379	287	44	318	277	309
	ENSMUSG00000004814.11	Ccl24	0.218539	-0.296472	0.119163	0.731708	0.976409	5	3	1	8	5	1	3	3	0	8	0	3
	ENSMUSG00000004815.13	Dgkq	0.0781129	5.26643	0.559826	0.458052	0.842536	276.22	344.52	258.15	309.06	314.23	253.43	275.84	256.14	60.18	279.01	252.3	296.01
	ENSMUSG00000004837.3	Grap	-0.0916692	2.9026	0.263826	0.609906	0.927591	52	58	53	35	50	35	55	41	12	35	63	53
	ENSMUSG00000004842.19	Pou1f1	-0.100825	-1.06935	0.0155126	0.90141	1	1	2	2	1	3	0	1	1	1	2	3	0
	ENSMUSG00000004843.8	Chmp2b	-0.0460978	5.51864	0.174852	0.677736	0.946467	333	467	402	422	430	281	398	406	76	392	432	368
	ENSMUSG00000004846.11	Plod3	-0.161725	6.4894	1.65278	0.206776	0.662338	412.8	654.61	557.13	283.28	617.3	448.94	538.27	525.67	99.59	401	689.88	632.76
	ENSMUSG00000004849.15	Ap1s1	-0.00931817	5.24209	0.00576641	0.939791	1	207	296	226	217	247	223	214	221	69	208	240	228
	ENSMUSG00000004864.14	Mapk13	0.201491	5.38584	3.06929	0.0862964	0.565763	409	498	443	563	460	469	467	413	65	406	433	413
	ENSMUSG00000004865.17	Srpk1	0.0162863	7.23031	0.0352145	0.851953	1	1256	1766	1407	1583	1482	1220	1588	1413	271	1309	1385	1497
	ENSMUSG00000004872.16	Pax3	0.102175	-0.49126	0.0187287	0.891824	1	0	0	2	5	7	0	1	3	1	2	1	3
	ENSMUSG00000004880.12	Lbr	-0.126971	6.09573	1.88423	0.176358	0.662338	395.83	620.1	489.66	434.45	517.32	386.62	541.43	515.45	101.61	449.05	499.44	555.68
	ENSMUSG00000004885.6	Crabp2	0.128458	4.47757	0.606417	0.442064	0.829	216	215	187	249	198	239	198	201	34	203	217	202
	ENSMUSG00000004891.17	Nes	0.117932	5.56801	0.246683	0.62497	0.931721	286	260	171	248	174	231	170	250	47	162	221	244
	ENSMUSG00000004892.14	Bcan	0.79337	-0.397497	1.78118	0.188424	0.662338	1	4	5	6	3	2	2	0	1	3	1	3
	ENSMUSG00000004894.11	Hapln2	-0.190489	-1.089	0.0478046	0.827874	1	1	2	1	0	1	0	1	1	0	1	0	2
	ENSMUSG00000004895.10	Prcc	-0.000673367	5.22464	3.84754e-05	0.995077	1	230	263	216	213	251	199	231	213	41	210	251	250
	ENSMUSG00000004896.17	Rrnad1	-0.101871	4.53542	0.609877	0.438743	0.826141	176.2	225.05	151.21	135.17	147.88	120.91	169.45	151.06	36.64	169.6	185.17	161.35
	ENSMUSG00000004897.17	Hdgf	0.062442	7.73828	0.350666	0.55657	0.894956	1428	1677	1327	1389	1442	1306	1490	1405	246	1226	1354	1470
	ENSMUSG00000004902.8	Slc25a18	-0.121735	1.51782	0.180629	0.672769	0.943216	16	34	12	6	27	10	20	24	5	17	16	13
	ENSMUSG00000004929.13	Thop1	0.152281	5.45502	1.63422	0.207387	0.662338	389	411	419	480	446	441	413	418	77	356	403	365
	ENSMUSG00000004931.12	Apba3	0.0828634	4.66571	0.521601	0.473732	0.849417	167	241	161	182	197	196	203	171	25	172	198	186
	ENSMUSG00000004933.18	Matk	-0.0412885	2.11616	0.0352859	0.86299	1	20	24	26	18	28	21	28	19	6	23	27	18
	ENSMUSG00000004934.15	Pias4	0.135493	4.75787	1.0274	0.315952	0.721026	194	225	165	153	178	153	164	176	24	121	183	189
	ENSMUSG00000004936.9	Map2k1	-0.101896	5.93807	0.81319	0.371769	0.772934	347	454	340	270	405	355	457	318	87	318	390	420
	ENSMUSG00000004937.7	Sgta	0.026601	5.85569	0.0755713	0.784594	1	374	444	353	403	426	366	389	393	85	367	365	386
	ENSMUSG00000004939.8	Nmrk2	-0.17347	2.77632	0.74255	0.393213	0.786116	30	60.42	28.05	35.37	33	23	49.69	39.49	6	43.5	33	31
	ENSMUSG00000004945.16	Tmem242	0.318334	4.67647	4.10097	0.0505029	0.49841	199	197	124	133	176	186	137	152	21	115	137	157
	ENSMUSG00000004947.16	Dtx2	-0.197491	5.69795	3.51351	0.0670826	0.543804	310	479	375	307	398	250	416	396	79	371	404	406
	ENSMUSG00000004948.13	Zp3	0	-1.62384	0	1	1	0	0	0	0	0	0	0	0	0	0	0	0
	ENSMUSG00000004951.11	Hspb1	0.266964	7.97949	1.58535	0.222887	0.662338	2426.92	2417.9	1804.66	2424.32	2425.59	2810.44	2128.66	2174.03	360.86	1692.56	2327.94	1884.21
	ENSMUSG00000004952.14	Rasa4	-0.151338	6.55019	1.84806	0.180486	0.662338	412	583	538	316	535	358.94	538	483	91	390	583	559
	ENSMUSG00000004961.8	Syt5	-3.59263	-1.201	11.3668	0.0016125	0.0949134	0	0	0	0	0	0	0	2	0	2	1	3
	ENSMUSG00000004980.17	Hnrnpa2b1	-0.0237515	8.24899	0.0528042	0.819249	1	1663	2166	1651	1394	1986	1677	1729	1667	330	1568	2025	1998
	ENSMUSG00000004988.10	Fxyd4	-0.0545912	0.285475	0.0168132	0.897383	1	6	9	4	10	4	5	9	4	0	4	10	8
	ENSMUSG00000004994.13	Ccdc130	-0.271184	2.9213	2.40152	0.127915	0.627521	34	74	39	37	39	49	65	53	13	52	50	46
	ENSMUSG00000004996.10	Mri1	0.254347	4.17268	2.77167	0.102872	0.599682	143	180	115	147	136	131	153	110	14	123	109	124
	ENSMUSG00000005034.16	Prkacb	-0.0262091	6.23184	0.0752018	0.785108	1	495	634	450	469	548	381	501	511	83	533	489	518
	ENSMUSG00000005043.14	Sgsh	0.183941	4.24166	1.97089	0.166916	0.662338	113.04	159.42	121.21	139.39	136.11	117.06	126.75	138.01	18.34	105.05	100.42	115.48
	ENSMUSG00000005045.17	Chd5	0.960577	1.06634	8.55078	0.00529674	0.182709	12	14	15	16	12	9	10	9	0	3	9	4
	ENSMUSG00000005054.8	Cstb	-0.492446	5.62258	14.0687	0.000592025	0.053923	218	439	322	281	334	264	420	400	107	306	455	495
	ENSMUSG00000005057.14	Sh2b2	-0.0891143	4.35966	0.472123	0.495383	0.859462	107	152	127	75	123	100	121	115	22	99	140	133
	ENSMUSG00000005069.13	Pex5	0.321293	5.3398	6.5623	0.0136779	0.293404	237	301	229	251	281	270	199	224	51	173	211	212
	ENSMUSG00000005078.17	Jkamp	0.0339656	3.69411	0.0522633	0.820161	1	92	125	104	92	100	81	104	97	14	97	91	104
	ENSMUSG00000005087.18	Cd44	-0.148278	8.72971	1.8998	0.174616	0.662338	2299	3999	3257	2481	3231	2304	3440	3180	547	2756	3681	3371
	ENSMUSG00000005089.16	Slc1a2	-0.135692	1.11294	0.162474	0.688714	0.951394	5	18	18	6	17	8	24	8	2	14	13	7
	ENSMUSG00000005102.14	Eif2ak4	-0.167048	4.36852	2.23541	0.141555	0.651495	116	159	134	120	134	86	163	138	30	123	139	125
	ENSMUSG00000005103.13	Wdr1	-0.185864	8.24315	4.0261	0.0505645	0.49841	1548	2356	1853	1357	2164	1634	2045.33	1943	400	1575	2427	2302
	ENSMUSG00000005107.14	Slc2a9	-0.247926	3.10444	2.07343	0.156501	0.662338	28	56	41	44	56	38	59	41	11	46	56	55
	ENSMUSG00000005124.11	Ccn4	0.24101	3.70667	1.83525	0.182731	0.662338	76	102	78	115	92	61	86	63	12	87	62	74
	ENSMUSG00000005125.14	Ndrg1	0.211688	6.83848	5.52593	0.0229766	0.367764	794.99	964.99	724	712	907	625	740	640	129	595	726	696
	ENSMUSG00000005131.5	4930550C14Rik	-0.417018	0.425473	1.3561	0.250082	0.662338	6	11	10	9	10	3	13	10	2	14	12	5
	ENSMUSG00000005142.11	Man2b1	-0.115081	7.0081	1.52195	0.223449	0.662338	784	953	786	642	849	652	948	824	136	720	892	939
	ENSMUSG00000005148.9	Klf5	-0.0418346	7.13485	0.172143	0.680099	0.947743	1054	1607	1341	1337	1276	911	1549	1338	236	1308	1088	1155
	ENSMUSG00000005150.17	Wdr83	0.0180559	3.67622	0.0176553	0.89486	1	75.55	86.26	71.23	88.32	92.97	81.64	86.84	86.71	10.13	70.69	89.64	90.54
	ENSMUSG00000005161.16	Prdx2	0.130923	6.54626	1.53087	0.222117	0.662338	767.76	853.92	664	703.89	851.85	774.87	719.86	689.85	134	628	744.96	759.85
	ENSMUSG00000005198.16	Polr2a	-0.0819951	7.67824	1.011	0.319804	0.725092	1135	1475	1279	1121	1309	1047	1434	1296	223	1150	1390	1349
	ENSMUSG00000005204.13	Senp3	0.0147512	5.72838	0.0208195	0.885888	1	357	382	361	347	340.01	285	358	336.97	60	306.01	382	355.01
	ENSMUSG00000005220.11	Corin	0.291989	0.103867	0.547421	0.463047	0.846829	4	7	6	10	11	4	8	5	2	5	5	4
	ENSMUSG00000005225.16	Plekha8	0.169011	4.03495	1.91348	0.173102	0.662338	131.68	161.83	112.85	104.8	114.36	116.93	105	111.4	18	91.59	106.92	145
	ENSMUSG00000005233.17	Spc25	-0.127256	2.88599	0.591875	0.445538	0.831858	48	69	48	42	45	47	52	45	9	61	50	66
	ENSMUSG00000005237.15	Dnah2	-0.222364	1.65795	0.79326	0.377645	0.773462	16	14	17	13	11	12	25	17	2	15	14.27	12
	ENSMUSG00000005251.16	Ripk4	0.19555	5.27074	2.97134	0.0913141	0.579808	316	403	330	364	351	288	337	287	59	306	291	263
	ENSMUSG00000005262.14	Ufd1	0.0540489	5.51354	0.288049	0.594001	0.917092	270	386	312	310	360	263	330	315	50	277	308	319
	ENSMUSG00000005267.14	Zfp287	-0.301448	3.43609	3.42315	0.0705698	0.548931	41	88	55	35	57	65	79	57	10	72	65	83
	ENSMUSG00000005268.21	Prlr	-0.158287	5.30903	0.728033	0.402762	0.79398	251	505	347	423	400	246	406	440	75	423	352	365
	ENSMUSG00000005299.7	Letm1	0.11478	5.99132	1.11103	0.297239	0.700133	385	467	386	410	489	460	442	415	71	347	438	396
	ENSMUSG00000005312.16	Ubqln1	-0.0141274	6.94057	0.0270108	0.870159	1	861	1197	995	1043	1060	900	1065	1066	189	979	1014	992
	ENSMUSG00000005320.10	Fgfr4	0.197515	0.757676	0.211313	0.647947	0.932216	7	15	1	4	11	10	6	7	3	6	6	7
	ENSMUSG00000005338.15	Cadm3	0.623884	6.0051	19.1432	0.000132932	0.0224798	435.69	583.34	506.53	378	531.27	389	360	295.93	45.62	254.93	385	272.81
	ENSMUSG00000005339.11	Fcer1a	-0.465159	0.809205	1.83493	0.182013	0.662338	9	13	13	5	15	7	16	13	2	17	17	9
	ENSMUSG00000005354.17	Txn2	0.159316	5.77259	2.70621	0.10662	0.599682	387	465	345	405	422	401	358	352	70	311	415	384
	ENSMUSG00000005355.10	Casp14	-0.0272036	5.19276	0.0274908	0.869624	1	323	544	405	652	416	308	482	476	89	459	391	410
	ENSMUSG00000005357.10	Slc1a6	2.50615	-1.34746	4.56567	0.0391045	0.446521	0	3	0	1	0	0	0	0	0	0	0	0
	ENSMUSG00000005360.15	Slc1a3	0.359027	4.31384	9.37339	0.00363199	0.149006	172	197	149	157	167	153	137	127	25	109	153	123
	ENSMUSG00000005362.15	Crbn	-0.0668362	5.10529	0.325325	0.571137	0.903927	190.44	309.57	228.11	228	277.14	168.45	269	239	44	215.01	227.51	269.51
	ENSMUSG00000005364.12	Il5ra	-0.258751	-0.286487	0.2456	0.622496	0.931721	1	11	4	0	3	5	5	3	2	4	7	3
	ENSMUSG00000005370.5	Msh6	0.161631	5.41821	2.50738	0.12001	0.612855	317	354	254	276	358	295	300	265	51	241	288	300
	ENSMUSG00000005371.16	Fbxo11	-0.0480837	5.96449	0.221799	0.639848	0.931721	405	638	494	455	508	348	510	482	104	401	504	497
	ENSMUSG00000005373.14	Mlxipl	0.389075	3.17871	3.50433	0.0690493	0.548931	49	89	51.12	90	70	61.94	75.91	43.82	3	53	56.25	47
	ENSMUSG00000005374.14	Tbl2	0.070991	5.07058	0.468384	0.497087	0.86079	223	287	206	206	233	197	225	195	40	202	221	231
	ENSMUSG00000005378.18	Bud23	0.0306075	3.99345	0.0482724	0.827047	1	110.81	104.32	72.24	99.45	102.45	117.34	100.29	100.63	16.21	71.95	117.5	120.32
	ENSMUSG00000005397.9	Nid1	0.0529645	7.53808	0.347087	0.558584	0.896379	1013.34	1464.75	1132.85	972	1124	846	1124	1061	188	885.7	1087.5	1133
	ENSMUSG00000005410.7	Mcm5	-0.136788	5.49055	1.57262	0.216019	0.662338	169	338	244	213	288	256	279	282	60	228	293	270
	ENSMUSG00000005413.9	Hmox1	-0.286424	6.76538	3.60786	0.0690199	0.548931	830	793	621	509	713	414	762	694	157	603	944	911
	ENSMUSG00000005417.18	Mprip	0.123351	8.34326	2.00573	0.163289	0.662338	2248.27	2707	2285.73	2441.32	2535.68	1949.41	2311.5	2166.51	404.64	2016.9	2221.59	2174.35
	ENSMUSG00000005442.14	Cic	-0.150802	8.03331	2.63529	0.111191	0.599682	1393	1972	1494	1332	1555	1192	1742	1674	288	1461	1775	1698
	ENSMUSG00000005447.13	Pafah1b3	-0.0781108	2.83705	0.233982	0.630829	0.931721	53	56	46	45	37	41	62	40	9	46	47	52
	ENSMUSG00000005465.10	Il27ra	-0.670358	2.02794	7.80205	0.00752216	0.21749	20	25	17	8	21	24	30	34	3	15	44	37
	ENSMUSG00000005469.11	Prkaca	0.110855	5.75261	1.12725	0.293779	0.695944	375	505	316	412	428	348	406	369	59	322	386	396
	ENSMUSG00000005470.9	Asf1b	-0.0978045	3.32102	0.330602	0.568043	0.902573	53	85	65	46	60	70	72	55	14	55	90	65
	ENSMUSG00000005474.10	Myl10	1.05457	-0.477285	2.62523	0.111857	0.599682	4	5	0	1	5	5	1	2	0	1	3	1
	ENSMUSG00000005481.19	Ddx39a	-0.0077101	5.44526	0.00495687	0.94417	1	265.73	291.81	237.24	261.33	288.84	305.28	283.3	269.94	54.4	232.63	294.31	316.8
	ENSMUSG00000005483.11	Dnajb1	-0.0952795	5.67856	0.877274	0.35373	0.756913	368	492	440	413	424	285	451	431	82	352	535	383
	ENSMUSG00000005493.16	Msh4	-0.108043	-0.28527	0.0495757	0.824766	1	5	2	4	6	5	1	6	4	0	3	5	4
	ENSMUSG00000005501.15	Usp40	-0.0298242	5.60345	0.0719027	0.789758	1	323	514	351	361	373	316	431	382	64	348	375	388
	ENSMUSG00000005503.9	Evx1	-1.21608	-1.27181	1.624	0.208789	0.662338	0	0	1	0	1	0	1	1	0	1	1	1
	ENSMUSG00000005505.13	Kbtbd4	0.147829	4.18813	1.2382	0.271468	0.671337	143.17	134.45	129.2	136.93	155.31	114.7	117.12	120.61	21.96	91.51	150.5	142.36
	ENSMUSG00000005506.17	Celf1	-0.0546789	7.32681	0.41806	0.521047	0.875794	912	1348	1008	945	1095	852	1134	959	221	912	1101	1125
	ENSMUSG00000005510.10	Ndufs3	0.161251	5.1761	2.11501	0.152496	0.662338	265.71	284.75	218.6	252.48	279.15	232.84	245.9	240.64	50.68	183.35	228.9	229.56
	ENSMUSG00000005514.15	Por	-0.198386	6.3889	3.21131	0.079559	0.548931	449	565	438	361	455	391	503	487	108	369	564	587
	ENSMUSG00000005533.11	Igf1r	0.126897	7.25311	2.27396	0.138245	0.647099	1041	1357	1029	1031	1100	867	1159	960	164	918	991	965
	ENSMUSG00000005534.11	Insr	0.110262	6.59515	1.5915	0.213327	0.662338	686	860	681	765	779	573	826	688	125	574	638	643
	ENSMUSG00000005540.11	Fcer2a	0.201527	1.04303	0.417757	0.521197	0.875794	18	11	8	7	14	13	9	10	3	12	11	8
	ENSMUSG00000005547.15	Cyp2a5	0.436258	-0.506166	0.460616	0.500659	0.862856	0	3	3	4	5	1	2	1	0	3	3	1
	ENSMUSG00000005553.15	Atp4a	0.534046	-1.03112	0.410247	0.52495	0.877963	0	1	1	2	2	1	1	1	0	0	1	1
	ENSMUSG00000005566.15	Trim28	0.134014	6.8787	1.59279	0.213145	0.662338	863	849	709	700	864	887	776	704	148	614	850	791
	ENSMUSG00000005575.17	Ube2m	-0.101816	5.40519	0.917125	0.343123	0.748541	212	403	272	280	297	206	304	275	56	270	320	308
	ENSMUSG00000005580.12	Adcy9	0.175976	5.12203	2.71361	0.106155	0.599682	293	336	198	268	267	221	244	236	41	251	197	245
	ENSMUSG00000005583.17	Mef2c	0.411919	6.76894	2.35296	0.141342	0.651395	792	1289	573	1191	921	640	884	664	76	753	538	714
	ENSMUSG00000005609.17	Ctr9	-0.126767	5.09266	1.18113	0.282659	0.684236	202	328	252	252	241	236	298	285	54	222	293	274
	ENSMUSG00000005610.18	Eif4g2	0.0129794	9.56486	0.0132216	0.908946	1	5148.57	7282.33	5881.33	5792.49	6551.23	5226.46	6445.4	5679.4	1176	5020.33	6248.39	6020.8
	ENSMUSG00000005611.16	Irag1	-0.0580276	2.49186	0.0814507	0.776593	0.99719	33	34	19	35	32	22	41	24	4	35	21	34
	ENSMUSG00000005615.16	Pcyt1a	-0.0514773	7.13957	0.257681	0.614088	0.929633	819.29	1121.92	850.85	775.2	886.42	692.12	978.2	919.05	149.7	790.8	868.8	954.24
	ENSMUSG00000005621.12	Zfp592	-0.073646	6.23488	0.646867	0.425278	0.814572	415	633	467	388	507	353	544	521	70	426	492	503
	ENSMUSG00000005625.16	Psmd4	0.140283	6.3695	1.72011	0.196039	0.662338	520	607	445	501	597	499	510	456	95	388	532	513
	ENSMUSG00000005628.13	Tmod4	0.528535	4.81453	4.12875	0.0560246	0.505198	226	295	113	241	220	165	180	146	13	149	153	134
	ENSMUSG00000005640.12	Insrr	-0.199994	1.32282	0.462965	0.499574	0.86203	5	22	21	6	16	12	16	14	4	13	17	16
	ENSMUSG00000005649.18	Cabp5	0.919218	-1.47889	0.79862	0.378286	0.773462	1	2	0	0	0	0	0	0	0	1	0	0
	ENSMUSG00000005656.10	Snx6	-0.345043	5.3051	7.99651	0.00686233	0.20615	219	389	298	258	306	187	379	352	75	265	353	357
	ENSMUSG00000005667.9	Mthfd2	-0.283682	4.03913	3.56166	0.0653028	0.537086	87	122	95	64	100	76	88	100	26	79	141	130
	ENSMUSG00000005672.13	Kit	0.174761	4.54355	1.65496	0.204576	0.662338	184	186	139	145	162	121	178	152	18	115	137	135
	ENSMUSG00000005674.10	Tomm40l	-0.0278881	4.25517	0.0396033	0.843115	1	105.82	126.92	93.51	96.78	152.3	135.62	125.23	102.85	25	103.07	132.93	140.08
	ENSMUSG00000005677.15	Nr1i3	0.226865	1.51645	0.517568	0.475437	0.849417	14.18	13.08	16.49	19.22	7.7	24.38	21.77	14.15	0	7.93	14.07	15.92
	ENSMUSG00000005681.13	Apoa2	-3.03165	-1.26793	5.54135	0.0242184	0.377344	0	0	0	0	0	0	3	0	1	0	1	0
	ENSMUSG00000005682.10	Pan2	0.12177	5.47554	1.54209	0.220458	0.662338	347	418	340	320	356	295	355	366	43	290	307	334
	ENSMUSG00000005683.9	Cs	0.098801	7.77848	1.35671	0.249978	0.662338	1498	2041.99	1565	1728	1784	1363	1706	1543.99	271	1445	1650	1518
	ENSMUSG00000005686.18	Ampd3	0.105991	5.72027	1.04498	0.311891	0.716413	356.54	502.38	436	441.54	448	317.8	479.24	398.76	80.78	316.45	405.64	310.66
	ENSMUSG00000005687.15	Bcas2	0.0716444	4.84153	0.448734	0.506209	0.866686	199	237	206	177	236	197	211	195	44	151	201	223
	ENSMUSG00000005696.12	Sh2d1a	-0.787961	0.93862	5.86069	0.0193919	0.342189	6	17.75	7	5	5	6	15	10	4	7.76	15.94	16
	ENSMUSG00000005698.16	Ctcf	-0.0165622	6.15767	0.0354896	0.851383	1	460	606	500	420.05	556	458	574	512	100	429.61	487.76	516
	ENSMUSG00000005699.17	Pard6a	0.14835	1.80871	0.447227	0.506921	0.867053	23	21	25	21	29	19	17	21	5	21	20	23
	ENSMUSG00000005705.11	Agrp	0.705092	-0.425689	1.76774	0.190068	0.662338	1	7	2	3	5	5	3	1	0	1	2	5
	ENSMUSG00000005716.17	Pvalb	0.928859	7.28623	13.0004	0.00185539	0.102102	1710	1451	484	1527	1457	1033	1006	638	61	663	666	683
	ENSMUSG00000005718.9	Tfap4	-0.0533266	3.53869	0.114335	0.736765	0.979275	66	110	74	80	89	52	97	72	18	82	76	69
	ENSMUSG00000005732.15	Ranbp1	0.164897	5.63192	1.52753	0.224207	0.662338	257	338	282	244	388	342	277	260	50	209	360	292
	ENSMUSG00000005763.16	Cd247	-0.360354	2.90912	3.3157	0.0749802	0.548931	24	45.78	57.61	21.94	54.53	37.16	47.72	47.59	9.8	41.26	63.57	57.6
	ENSMUSG00000005774.13	Rfx5	-0.112785	4.85184	0.908492	0.345383	0.750701	174.31	260.92	222.19	160.85	210.69	136	200.22	213.26	41.44	195.13	230.75	193.93
	ENSMUSG00000005779.13	Psmb4	0.0970566	6.651	0.690305	0.41064	0.801241	535	731	545	524	687	679	581	553	112	488	630	646
	ENSMUSG00000005800.4	Mmp8	0.293806	2.83348	1.05099	0.315109	0.720003	58	63	60	25	40	39	39	42	5	27	50	41
	ENSMUSG00000005802.13	Slc30a4	0.00499517	6.0965	0.00171688	0.967148	1	478	705	579	631	686	417	666	602	97	531	562	576
	ENSMUSG00000005803.15	Sqor	0.162276	3.5984	1.10539	0.298453	0.701502	63	90	62	62	80	66	74	63	8	50	78	59
	ENSMUSG00000005804.15	Bloc1s6	-0.0591713	4.28911	0.160138	0.690853	0.952706	120	170	143	122	150	132	156	139	33	119	130	170
	ENSMUSG00000005813.13	Metap1	0.0599744	5.52923	0.381233	0.53992	0.886401	308	414	306	285	337	313	305	303	59	247	336	388
	ENSMUSG00000005823.10	Gpr108	0.0300325	5.1507	0.0736229	0.787319	1	200	307	249	219	245	207	283	192	47	215	230	235
	ENSMUSG00000005824.8	Tnfsf14	-0.0875839	2.46013	0.151987	0.698402	0.956863	29	37	36	16	30	22	33	29	7	23	38	25
	ENSMUSG00000005836.11	Gata6	0.311239	2.11864	2.11712	0.152297	0.662338	37	31	36	38	37	37	32	27	3	26	34	33
	ENSMUSG00000005846.13	Rsl1d1	0.183719	5.76204	2.95072	0.0924114	0.583082	421	453	347	384	500	475	407	375	61	350	432	391
	ENSMUSG00000005864.8	Cnga2	1.79728	-1.17861	2.93643	0.0931802	0.585053	3	0	0	0	2	1	0	1	0	0	0	0
	ENSMUSG00000005871.16	Apc	-0.051463	7.36262	0.343942	0.560364	0.897462	1068	1445	1083	1019	1277	876	1245	1167	198	1113	1188	1196
	ENSMUSG00000005873.7	Reep5	0.0607453	7.14824	0.489973	0.487384	0.854377	953	1213	935	1045	1147	863	1017	1015	157	977	943	1087
	ENSMUSG00000005881.14	Ergic3	-0.0272837	5.45953	0.0546675	0.816146	1	240	334	241	263	306	198	277	241	60	233	277	279
	ENSMUSG00000005882.19	Uqcc1	0.158869	4.62385	1.95067	0.169065	0.662338	174	178	130	160	189	161	157	163	30	124	143	154
	ENSMUSG00000005883.16	Spo11	-0.0942329	-0.383594	0.0247776	0.875596	1	1	3	4	2	3	1	2	5	0	2	2	2
	ENSMUSG00000005886.15	Ncoa2	-0.200021	6.72811	3.16549	0.0818056	0.553573	615	1126	887	828	835	539	1016	930	173	813	858	957
	ENSMUSG00000005892.5	Trh	1.13454	-1.62433	1.53569	0.264342	0.662338	0	0	0	0	1	0	0	0	0	0	0	0
	ENSMUSG00000005893.15	Nr2c2	0.0266562	6.61672	0.0833082	0.77413	0.99691	608.25	929.48	669.84	658.67	796.33	537.19	773.01	659.61	123.45	616.23	652.97	734.96
	ENSMUSG00000005897.15	Nr2c1	-0.120588	3.61619	0.795094	0.377099	0.773462	63	131	85	91	92	67	98	96	21	81	88	104
	ENSMUSG00000005899.15	Smpd4	0.0288587	5.18104	0.0860665	0.770528	0.99691	267	320	224	215	258	212	256	244	42	230	236	268
	ENSMUSG00000005907.15	Pex1	-0.0642597	4.13986	0.25045	0.61909	0.931721	100.54	167.05	117.7	107.01	159.54	79.03	121.26	140.54	26.5	119.09	120.06	118.38
	ENSMUSG00000005917.16	Otx1	0.0583001	3.87492	0.158832	0.692036	0.953454	108	160	157	146	120	98	152	131	23	138	111	99
	ENSMUSG00000005936.20	Kctd20	0.103636	6.65167	1.39225	0.243954	0.662338	606	815	684	595	706	602	647	630	102	552	649	702
	ENSMUSG00000005947.12	Itgae	-0.2313	1.88927	0.910866	0.34476	0.750052	26	30	24	16	24	9	28	28	2	26	20	28
	ENSMUSG00000005949.10	Ctns	-0.329352	4.14324	5.78539	0.0201425	0.347391	91	160	139	117	112	79	147	133	31	138	138	159
	ENSMUSG00000005950.15	P2rx5	0.473283	1.49937	2.88359	0.0960878	0.59314	18	28	15	24	18	15	17	9	2	8	17	21
	ENSMUSG00000005951.14	Shpk	0.10279	2.40634	0.274662	0.60268	0.922963	38	40	25	35	31	24	36	24	5	31	28	32
	ENSMUSG00000005952.16	Trpv1	0.800867	-1.11487	1.06471	0.307416	0.711524	2	4	2	1	2	0	0	1	0	3	1	0
	ENSMUSG00000005958.16	Ephb3	-0.0169662	5.03476	0.0219192	0.882935	1	255	344	326	362	242	229	330	272	58	301	286	291
	ENSMUSG00000005968.15	Tuft1	0.0877553	5.95588	0.715182	0.402007	0.79334	649	737	591	790	672	609	689	650	133	597	595	615
	ENSMUSG00000005973.7	Rcn1	-0.0133027	6.24243	0.00834674	0.927863	1	396	632	432	457	566	478	465	440	109	433	552	541
	ENSMUSG00000005980.16	Dnase1	0.0279671	2.23455	0.0155494	0.901294	1	37	27.39	36.21	22	32.75	31	24	37.12	4.39	28.11	28.78	38.47
	ENSMUSG00000005981.12	Trap1	0.0526116	5.52575	0.315514	0.576981	0.907297	268	410	288	301	352	284	330	277	66	263	349	280
	ENSMUSG00000005982.15	Naa60	-0.0850082	5.59209	0.390989	0.535892	0.884791	307.4	461.17	375.08	328.53	360.7	265.64	401.77	383	63.01	321.67	402.52	363.02
	ENSMUSG00000005983.16	1700037C18Rik	-0.118927	2.47786	0.35151	0.576005	0.906804	35.55	63.1	27.92	19.92	33.42	23.36	37.02	27.48	9.6	24.72	44.53	42.62
	ENSMUSG00000005986.17	Ankrd13d	0.227037	1.87154	0.892535	0.349615	0.753714	43	28	26	34	24	32	35	18	5	25	18	40
	ENSMUSG00000005994.15	Tyrp1	-0.115832	1.23864	0.181157	0.709927	0.963627	12	22	9	11	21	9	15	9	3	22	17	11
	ENSMUSG00000006005.19	Tpr	-0.122142	7.82078	1.91555	0.172874	0.662338	1388.18	1920	1438.39	1238.7	1603.95	1292.95	1651.07	1571.7	308	1334.01	1854.06	1625.05
	ENSMUSG00000006007.15	Pdc	1.12501	-1.62459	1.54155	0.264342	0.662338	0	1	0	0	0	0	0	0	0	0	0	0
	ENSMUSG00000006010.15	Odr4	-0.0948158	4.91794	0.824966	0.368359	0.769544	183	266	194.83	192.38	225.37	157.26	246	213.4	35	184.1	230	226.23
	ENSMUSG00000006014.17	Prg4	0.290529	10.0042	0.938947	0.34459	0.750052	9171.82	10735	8471.78	10697.9	7167.67	4436.79	8920.93	5095.9	1132	9280.88	6429.94	5202.72
	ENSMUSG00000006019.16	Dhx34	-0.278294	4.69132	4.88939	0.0319148	0.413191	145	168	146	126	187	122	180	175	47	154	191	165
	ENSMUSG00000006021.6	Kptn	0.107372	2.93265	0.304633	0.583603	0.911131	50	55	40	47	67	65	47	47	10	44	63	51
	ENSMUSG00000006024.14	Napa	0.0205106	6.06135	0.0400415	0.842261	1	444	614	465	488	538	407	540	481	87	409	502	516
	ENSMUSG00000006050.13	Sra1	-0.0502504	4.93721	0.155984	0.694665	0.954611	191	226	181	156	216	179	203	171	34	160	234	241
	ENSMUSG00000006057.16	Atp5g1	0.16347	5.41528	1.69339	0.199755	0.662338	262.08	372.93	201.07	351.16	336.57	342.52	294.72	288.5	46.45	260.62	292.44	280.92
	ENSMUSG00000006058.11	Snf8	0.150559	4.70697	1.39428	0.243615	0.662338	149	235	153	156	209	174	166	163	20	146	184	177
	ENSMUSG00000006095.13	Tbcb	-0.00502465	5.21608	0.00111212	0.973605	1	210.1	264.4	208.79	147.78	233.21	252.81	225	219.51	38.61	172.26	263.7	243
	ENSMUSG00000006127.10	Inpp5k	-0.113252	5.67308	1.03966	0.313112	0.717711	327	517	380	379	400	201	467	364	74	392	355	379
	ENSMUSG00000006134.5	Crkl	-0.099786	6.3628	1.26028	0.267291	0.665769	537	689	536	474	527	442	619	568	105	466	645	583
	ENSMUSG00000006143.13	Upk3bl	-0.791528	-1.53464	0.588747	0.47887	0.849417	0	0	0	0	1	0	0	1	0	1	0	0
	ENSMUSG00000006154.14	Eps8l1	0.0388259	6.10542	0.0532336	0.819628	1	734	969	713	1059	790	657	878	770	166	767	758	762
	ENSMUSG00000006169.21	Clint1	-0.165174	6.7887	3	0.0898125	0.574931	661	992	808	717	779	601	907	845	161	737	860	896
	ENSMUSG00000006179.10	Prss16	-0.140157	0.613211	0.140506	0.709462	0.963489	6	13	11	7	4	12	10	11	5	6	14	3
	ENSMUSG00000006191.18	Cdkal1	-0.113539	4.37615	0.944863	0.335999	0.741442	116	196	161	156	152	102	162	157	36	132	163	160
	ENSMUSG00000006204.8	Cdcp3	0.783314	-0.656005	1.46084	0.232833	0.662338	8	2	6	0	1	3	2	2	0	3	2	1
	ENSMUSG00000006205.14	Htra1	0.169908	6.12855	3.51462	0.0670412	0.543653	463	577	433	512	567	396	444	417	101	394	399	458
	ENSMUSG00000006215.13	Zbtb17	0.174821	4.56374	1.93198	0.171079	0.662338	174	179	156	158	156	160	130	160	26	133	164	149
	ENSMUSG00000006216.11	Clcnkb	0.166499	-1.32026	0.0279918	0.867845	1	1	2	0	0	0	1	2	0	0	1	0	0
	ENSMUSG00000006218.5	Fam131c	0.665227	-0.337186	1.45694	0.233448	0.662338	0	10	4	11	3	6	1	5	1	3	4	4
	ENSMUSG00000006219.13	Fblim1	-0.537515	4.28117	14.1267	0.000471164	0.0491737	78	117	89	55	89	76	127	115	22	89	129	153
	ENSMUSG00000006221.8	Hspb7	0.238878	7.31257	1.70203	0.206477	0.662338	1026	1443	786	1478	1090	1167	1219	1162	156	882	871	977
	ENSMUSG00000006235.7	Epor	0.619611	-0.180385	0.875115	0.355202	0.757751	9	1	5	6	1	1	5	3	0	4	1	0
	ENSMUSG00000006241.17	Ccdc159	-0.366593	-0.343964	0.421404	0.519392	0.874788	3	2	3	5	2	0	4	2	1	0	5	5
	ENSMUSG00000006262.16	Mob1b	-0.0468291	6.36663	0.178607	0.674497	0.944315	567	859	680	612	773	492	692	683	116	665	643	766
	ENSMUSG00000006269.8	Atp6v1b1	-0.24569	1.40542	0.700628	0.406802	0.797298	19	24	10	28	9	15	27	25	4	20	19	13
	ENSMUSG00000006273.15	Atp6v1b2	-0.135127	7.46537	1.94109	0.170094	0.662338	1051	1313	1169	939	1220	1111	1296	1200	228	995	1382	1453
	ENSMUSG00000006276.11	Eps15l1	-0.123531	6.19551	1.77993	0.188576	0.662338	496	702	524	509	475	409	547	544	125	499	560	596
	ENSMUSG00000006281.9	Tep1	-0.235674	6.8227	6.76043	0.0124121	0.282529	609.64	885.3	679	490.55	690	545.63	799	730.65	143	637	804.4	850
	ENSMUSG00000006288.9	Ttc5	0.154464	4.92909	1.01112	0.321806	0.72753	196	243	145	175	215	167	160	165	30	157.98	177	199
	ENSMUSG00000006289.15	Osgep	0.203082	4.21834	2.79521	0.101181	0.599682	125.67	168.25	150.88	135.74	156.82	117.75	148.85	125.74	24	115.84	102.91	123.82
	ENSMUSG00000006299.14	Aamp	0.223371	6.14725	1.66309	0.210457	0.662338	573	542	374	421	518	492	431	426	70	375	459	450
	ENSMUSG00000006301.18	Tmbim1	0.182446	7.23254	4.457	0.0400962	0.451303	1117.11	1467	1148.37	1243.27	1194	1008.44	1200.83	1015.94	199	1025	1014	1018.97
	ENSMUSG00000006304.15	Arpc2	-0.27106	7.90857	7.44936	0.00889669	0.237247	1167	1815	1450	1055	1685	1222	1812	1572	316	1234	1834	2002
	ENSMUSG00000006307.17	Kmt2b	0.050588	6.86381	0.280183	0.599068	0.920099	799	938	771	665	743	657	829	761	133	620	784	731
	ENSMUSG00000006310.11	Zbtb32	-0.0901806	2.39661	0.134916	0.715072	0.965734	27	45	33	7	36	20	25	33	3	23	34	37
	ENSMUSG00000006311.9	Etv2	-0.123476	-1.56392	0.013522	0.917965	1	0	0	0	0	1	0	0	1	0	0	0	0
	ENSMUSG00000006313.6	Upk1a	0.192612	0.158392	0.205434	0.652452	0.933084	6	8	2	4	11	7	10	6	0	6	2	5
	ENSMUSG00000006315.10	Tmem147	0.0979606	4.35347	0.469698	0.496487	0.860668	102	201	172	183	161	111	161	145	26	155	139	120
	ENSMUSG00000006333.15	Rps9	0.32362	8.64483	2.62491	0.121022	0.61483	3017.4	2792.86	2229.56	2340.46	3193.55	3127.03	2260.65	2259.58	416.28	1898.79	2392.42	2551.47
	ENSMUSG00000006335.17	Tfpt	0.0466539	3.00803	0.0432658	0.836395	1	59	56	41	25	71	40	46	48	7	30	62	54
	ENSMUSG00000006342.16	Susd2	-0.108024	5.79596	0.993856	0.323898	0.729271	543	626	508	664	622	449	690	637	110	588	576	604
	ENSMUSG00000006344.18	Ggt5	0.146451	3.77089	0.668345	0.41849	0.808189	92	103	101	53	107	85	70	76	25	63	109	68
	ENSMUSG00000006345.11	Ggt1	-1.08272	-0.0314117	4.13359	0.0477	0.487385	0	6	3	1	1	3	4	3	1	8	3	7
	ENSMUSG00000006356.11	Crip2	0.162398	6.66803	2.55837	0.116403	0.604745	697	950	791	973	887	848	808	823	144	718	796	719
	ENSMUSG00000006360.12	Crip1	0.190608	7.34312	3.01615	0.088979	0.573033	1038	1143	912	743	1250	994	906	876	144	778	1037	976
	ENSMUSG00000006362.17	Cbfa2t3	-0.0247488	4.85785	0.044751	0.833376	1	153.34	229.79	160.9	134.01	179.43	132	175.52	166.55	23	143.76	200.16	172.87
	ENSMUSG00000006369.15	Fbln1	0.4109	6.06136	13.0472	0.000735557	0.0617008	558	580	334	452	490	370	411	340	60	292	377	352
	ENSMUSG00000006373.11	Pgrmc1	0.040671	5.82802	0.189878	0.665009	0.939256	397	486	414	436	443	324	421	407	73	363	428	422
	ENSMUSG00000006378.16	Gcat	0.237585	4.7658	4.29378	0.0437541	0.471038	239	306	254.43	359.27	282.71	297.9	260	280.06	54	219.87	239	219.09
	ENSMUSG00000006386.16	Tek	0.083067	4.50577	0.442665	0.509086	0.868584	151	162	117	143	145	106	165	123	23	111	114	142
	ENSMUSG00000006389.14	Mpl	1.24251	-0.0813158	2.55548	0.118784	0.610206	6	6	1	5	2	1	1	0	2	0	2	2
	ENSMUSG00000006390.16	Elovl1	-0.15424	5.94197	1.5879	0.214859	0.662338	363	667	620	614	523	451	639	595	94	554	698	595
	ENSMUSG00000006392.17	Med8	0.115399	5.07132	0.938466	0.337623	0.743514	214	258	202	249	225	222	245	236	32	169	218	222
	ENSMUSG00000006395.17	Hyi	0.153296	2.76926	0.600467	0.442275	0.829017	33	51	37	30	34	40	42	32	4	25	33	42
	ENSMUSG00000006398.16	Cdc20	-0.241081	4.38353	3.30876	0.0752751	0.548931	121.99	163	120.99	132	109	105	141	136	29	134	145	183
	ENSMUSG00000006403.14	Adamts4	0.397838	4.38733	2.0535	0.167649	0.662338	112	117	219	62	120	199	131	98	21	73	152	85
	ENSMUSG00000006411.13	Nectin4	0.195387	6.04486	2.79342	0.101621	0.599682	583	722	644	799	693	591	664	654	91	507	624	593
	ENSMUSG00000006412.11	Pfdn2	0.206095	4.29447	1.4523	0.236433	0.662338	139.53	162.97	107.14	100.84	128.05	113	117.77	91.45	22.93	105.48	115.22	106.79
	ENSMUSG00000006418.18	Rnf114	-0.0959089	6.87133	0.765146	0.386164	0.779773	546	848	788	441	810	601	770	683	141	551	818	748
	ENSMUSG00000006423.16	C330007P06Rik	-0.0590011	5.2032	0.28116	0.598434	0.919859	214.29	334.8	245.35	247.38	270.15	165.96	274.72	236.63	51.38	218.37	239.8	293.62
	ENSMUSG00000006435.17	Neurl1a	0.374277	3.74763	4.91186	0.0316266	0.411925	106.73	130.47	56.5	126.88	97.2	80.16	100.78	79.38	11	77.77	62.66	71.13
	ENSMUSG00000006442.11	Srm	0.301211	4.77344	6.40958	0.0147473	0.303304	186	219	185	168	189	224	171	163	28	132	172	171
	ENSMUSG00000006445.4	Epha2	0.0971859	5.10605	0.730863	0.396933	0.789095	235	295	258	362	303	250	286	252	49	252	288	262
	ENSMUSG00000006456.11	Rbm14	-0.0698498	5.98755	0.483086	0.490444	0.856401	419.89	557.69	427.29	422.22	372.22	354.23	451.38	451.46	80.91	373.76	522.4	453.56
	ENSMUSG00000006457.5	Actn3	0.942762	7.30165	13.6474	0.00151419	0.093072	1480	1336	528	1464	1178	969	970	586	69	586	525	565
	ENSMUSG00000006462.7	A530013C23Rik	0.292768	2.76708	2.69696	0.107204	0.599682	50	83	45	66	59	45	48	50	11	36	50	47
	ENSMUSG00000006463.14	Zdhhc24	-0.0316408	3.16484	0.0402438	0.841869	1	58	69	77	47	57	49	75	56	12	48	70	56
	ENSMUSG00000006464.10	Bbs1	0.224208	3.24157	2.22042	0.142866	0.65521	81	80	62	70	59	58	58	58	8	63	60	61
	ENSMUSG00000006469.14	Slc34a3	-0.148389	-1.5343	0.0202656	0.887548	1	0	0	0	1	0	1	0	0	0	2	0	0
	ENSMUSG00000006471.19	Ndor1	0.103221	5.34194	0.898412	0.348048	0.752419	332.21	353.09	322.31	347.89	346.17	238.74	318.96	306.93	64.65	260.87	315.85	281.56
	ENSMUSG00000006476.20	Nsmf	0.190442	4.49755	2.53584	0.117981	0.608943	152	194	121	137	126	120	138	107	20	115	139	131
	ENSMUSG00000006494.12	Pdk1	0.127666	5.76781	1.64472	0.205958	0.662338	387	521	357	435	447	292	387	385	75	356	335	365
	ENSMUSG00000006498.17	Ptbp1	-0.209122	7.60395	3.4655	0.0691828	0.548931	1033.9	1842.7	1376.84	1295.75	1466.5	1008.41	1672.86	1586.85	312	1288.13	1531.76	1478.7
	ENSMUSG00000006517.6	Mvd	0.196528	3.6311	1.61104	0.210584	0.662338	99	109	76	104	91	82	93	99	11	75	91	62
	ENSMUSG00000006519.12	Cyba	-0.440618	6.20089	3.91773	0.0620782	0.524605	309	375	281	154	409	320	403	391	65	273	494	599
	ENSMUSG00000006522.18	Itih3	0.298431	-0.578356	0.221156	0.640332	0.931721	3	2	5	3	2	3	7	1	0	0	1	4
	ENSMUSG00000006526.14	Stimate	0.138014	4.18278	1.09485	0.300741	0.704065	118	135	112	117	125	94	104	126	17	85	111	114
	ENSMUSG00000006527.17	Sfmbt1	0.0495156	5.30267	0.213863	0.645887	0.931721	253	331	257	214	301	203	264	264	43	241	215	277
	ENSMUSG00000006538.13	Ihh	0.138746	-0.753156	0.0399654	0.842409	1	1	4	0	4	0	4	2	1	1	2	1	3
	ENSMUSG00000006542.14	Prkag3	1.07708	1.86028	14.1399	0.000468625	0.049081	29	32	14	40	35	21	18	16	2	12	7	15
	ENSMUSG00000006546.4	Cryba2	1.14637	-1.62401	1.52633	0.264342	0.662338	1	0	0	0	0	0	0	0	0	0	0	0
	ENSMUSG00000006567.12	Atp7b	-1.62312	-1.22291	2.24546	0.140684	0.650363	1	0	0	0	0	0	1	2	1	0	0	0
	ENSMUSG00000006574.16	Slc4a1	1.11114	2.8477	1.88272	0.185834	0.662338	51	10	16	8	6	12	5	8	5	3	5	15
	ENSMUSG00000006575.15	Rundc3a	0.0786113	1.23092	0.0755847	0.784575	1	8	25	13	21	16	15	17	12	3	23	12	12
	ENSMUSG00000006576.17	Slc4a3	0.0200497	4.31613	0.0173942	0.895636	1	111	152	76	110	95	100	111	83	25	72	128	126
	ENSMUSG00000006585.4	Cdt1	-0.174749	4.71062	1.73074	0.194687	0.662338	119	160	144	97	178	147	163	157	29	153	158	168
	ENSMUSG00000006586.16	Runx1t1	0.113223	2.78011	0.404171	0.528022	0.880214	34	66	34	41	44	36	49	41	4	41	31	39
	ENSMUSG00000006587.7	Snai3	0.214539	0.15678	0.22208	0.639636	0.931721	10	6	2	10	6	2	4	4	1	1	7	10
	ENSMUSG00000006589.9	Aprt	-0.114914	5.02153	0.742528	0.393273	0.786116	147	241	178	130	214	201	190	224	40	152	227	205
	ENSMUSG00000006599.14	Gtf2h1	-0.10686	5.27107	1.01698	0.318391	0.723306	228	313	241	228	284	246	264	273	57	233	307	293
	ENSMUSG00000006611.16	Hfe	0.0608184	4.12021	0.261795	0.611282	0.928221	114	154	112	104	127	104	136	110	27	90	101	121
	ENSMUSG00000006638.16	Abhd1	0.093895	0.258823	0.0510706	0.822189	1	3.75	11.59	3.69	3.91	7.19	7.63	6.23	5.89	1.17	2.46	5.93	8.74
	ENSMUSG00000006641.13	Slc5a6	0.0101847	3.23272	0.00443589	0.962327	1	49	76.95	71	54	55.2	63.37	74.06	55	12	57	63.2	57
	ENSMUSG00000006642.4	Tcf23	-1.00165	-1.24812	1.37987	0.246031	0.662338	1	0	1	0	1	0	1	1	0	1	0	3
	ENSMUSG00000006649.18	Nphs1	0.265203	5.07769	1.22856	0.281132	0.683002	330.46	321.22	246.9	240.29	361.16	292.79	236.4	293.54	43.93	219.44	262.91	248.22
	ENSMUSG00000006651.9	Aplp1	0.379285	1.13971	1.14835	0.289357	0.691729	16	8	7	8	19	13	7	7	2	14	10	7
	ENSMUSG00000006673.15	Qrich1	-0.115946	6.7418	1.57509	0.215664	0.662338	564.75	975.79	714.67	706.46	831.68	544	861.74	820.97	139.69	696	784.03	747.17
	ENSMUSG00000006675.11	P4htm	0.440642	0.991242	1.58751	0.213893	0.662338	11	16	5	11	18	7	9	15	3	5	2	8
	ENSMUSG00000006676.17	Usp19	0.137132	7.09325	1.93268	0.171004	0.662338	1034	1042	873	921	1057	871	947	831	161	799	945	936
	ENSMUSG00000006678.7	Pola1	-0.047063	5.02211	0.163786	0.687527	0.951249	190	261	198	177	246	233	223	237	46	192	205	261
	ENSMUSG00000006699.18	Cdc42	-0.279636	8.37548	7.07285	0.0106631	0.262915	1805	2920	2305	1761	2577	1756	2732	2502	495	2251	2703	3019
	ENSMUSG00000006705.14	Pknox1	-0.00140974	4.94724	0.000201338	0.988739	1	180	252	210	205	253	187	237	216	44	181	221	209
	ENSMUSG00000006711.16	D130043K22Rik	1.62116	-1.22758	3.05692	0.0869127	0.567915	2	5	0	1	0	1	0	1	0	0	0	1
	ENSMUSG00000006715.12	Gmnn	-0.425766	2.84503	3.66061	0.0625845	0.526862	28	35	26	24	47	52	52	47	7	49	33	63
	ENSMUSG00000006717.8	Acot13	0.0446656	2.40455	0.0487888	0.82614	1	29	60	42	47	40	26	43	47	5	35	35	40
	ENSMUSG00000006720.17	Zfp184	-0.135812	-0.735625	0.0372469	0.847793	1	6	5	2	0	1	0	1	3	1	2	4	2
	ENSMUSG00000006724.13	Cyp27b1	0.105094	-0.020855	0.0511875	0.821989	1	4	13	6	5	1	3	7	2	2	2	7	5
	ENSMUSG00000006728.13	Cdk4	0.00334821	6.09325	0.00112087	0.973434	1	435.28	513.21	410.51	381.76	464.07	405.06	425.78	421.87	62.63	397.55	480.84	528.21
	ENSMUSG00000006731.11	B4galnt1	-0.451873	5.40102	9.70295	0.00379352	0.152166	189.42	286.25	207.34	134.62	257.45	163.89	279.32	259.58	55.05	219.94	313.59	324.02
	ENSMUSG00000006732.15	Mettl1	0.285842	3.50209	4.00264	0.0512144	0.49841	81	92	71	85	94	78	73	62	18	58	66	74
	ENSMUSG00000006736.10	Tspan31	-0.114874	4.93598	1.18302	0.282279	0.683794	222.72	255.79	212.49	176.24	218.93	168.94	239.22	233.13	37.37	202.45	241.16	234.79
	ENSMUSG00000006740.15	Kif5b	0.107179	7.91536	1.43768	0.236516	0.662338	1710.68	2002.91	1704.9	1668.29	2045.45	1717.35	1821.67	1674.54	282.52	1483.64	1845.82	1807.57
	ENSMUSG00000006763.15	Saal1	0.147846	3.84138	1.34438	0.252109	0.662338	99	122	116	88	112	86	98	84	23	67	112	97
	ENSMUSG00000006764.9	Tph2	-0.507895	-1.34722	0.32434	0.571719	0.904187	0	1	1	1	0	0	1	0	0	1	2	0
	ENSMUSG00000006777.8	Krt23	0.126664	3.85534	0.748147	0.39145	0.784461	171	189	191	212	218	107	199	173	29	132	182	153
	ENSMUSG00000006782.17	Cnp	-0.394809	5.70889	9.07429	0.00450696	0.168501	201.44	307.36	265.43	135	275.87	202.86	308.52	295.92	62	239.93	303.85	351.88
	ENSMUSG00000006784.15	Odad4	-0.431175	-0.382342	0.632891	0.43029	0.818957	8	2	2	3	1	2	5	7	0	1	6	3
	ENSMUSG00000006800.15	Sulf2	0.156025	6.31971	3.25044	0.077807	0.548931	547	737.25	597	583	579.68	500.33	609	523	99.15	471.55	556.24	500.45
	ENSMUSG00000006818.6	Sod2	0.125638	7.26483	1.2647	0.266544	0.664933	906.29	1244.26	1205.72	815.81	1305.82	990.21	1079.56	939.03	167.95	832.78	1215.98	975.55
	ENSMUSG00000006850.9	Tmco6	0.0667917	2.59838	0.107268	0.744728	0.983691	40	56	43	37	46	35	40	30	1	50	46	51
	ENSMUSG00000006906.11	Stambp	-0.0766052	4.80292	0.476705	0.493309	0.858125	183	261	231	203	204	175	241	236	35	204	194	251
	ENSMUSG00000006920.15	Ezh1	0.0639886	6.05726	0.458759	0.50152	0.863251	446	646	476	460	540	341	528	461	71	422	456	496
	ENSMUSG00000006930.16	Hap1	0.615023	2.85822	7.65386	0.00820164	0.227826	41	52	60	28	42	55	41	27	5	28	36	22
	ENSMUSG00000006931.16	P3h4	0.0153987	3.85026	0.0137091	0.90729	1	106	140	102	134	111	115	127	120	22	126	102	110
	ENSMUSG00000006932.18	Ctnnb1	0.0753036	8.59942	0.843938	0.362956	0.765155	2458.72	3451.57	2500.74	2749.69	2934.68	2425.84	2705.62	2544.84	515.96	2332.76	2629.73	2746.65
	ENSMUSG00000006941.6	Eif1b	-0.181251	4.10598	0.57691	0.455589	0.841095	86	147	83	87	74	62	110	88	25	94	97	100
	ENSMUSG00000006948.8	Klk4	-1.25801	-1.62412	1.90173	0.215017	0.662338	0	0	0	0	0	0	0	1	0	0	0	0
	ENSMUSG00000006958.15	Chrd	0.372943	3.00437	4.46939	0.0398323	0.450032	35	56	37.91	58	51	41	37	33	3	31	35.91	49.84
	ENSMUSG00000006998.17	Psmd2	0.0655845	7.78049	0.430583	0.514898	0.872899	1228.41	1625.73	1233.19	1297.52	1436.37	1426.94	1340.06	1278.46	259.89	1123.13	1418.05	1417.46
	ENSMUSG00000007021.6	Syngr3	0.423795	-0.416171	0.548113	0.462766	0.84666	7	6	0	3	7	2	4	2	0	3	3	4
	ENSMUSG00000007029.17	Vars	0.112538	6.63075	0.762036	0.388894	0.782618	604	655	572	535	692	733	648	570	104	461	705	625
	ENSMUSG00000007030.9	Vwa7	0.433163	1.86851	2.82349	0.0995191	0.599682	20	36.51	14	33	37	11	21	22	3	16.57	15	18
	ENSMUSG00000007033.5	Hspa1l	0.413221	2.73466	4.20592	0.0458722	0.479976	45.83	66.81	31.34	67.35	41.81	35.27	51.28	38.16	2.67	33.92	31.56	32.99
	ENSMUSG00000007034.16	Slc44a4	0.728762	-1.22507	0.701576	0.406878	0.797311	1	1	0	3	0	3	0	1	0	1	0	2
	ENSMUSG00000007035.16	Msh5	-0.134555	1.21621	0.244128	0.623538	0.931721	13	21	14	13	12	11	10	12	3	19	12	23
	ENSMUSG00000007036.16	Abhd16a	-0.0250615	5.21325	0.0560606	0.813862	1	220	307	254	202	265	185	258	215	60	196	258	240
	ENSMUSG00000007038.6	Neu1	-0.26368	4.62176	4.384	0.0416894	0.460491	116	164	135	93	171	104	150	154	38	121	148	183
	ENSMUSG00000007039.13	Ddah2	0.309459	3.7523	1.94547	0.174476	0.662338	111	92	56	63	83	82	65	55	15	68	56	80
	ENSMUSG00000007041.10	Clic1	-0.232212	7.44317	2.73115	0.109731	0.599682	993	1250	970	749	1190	952	1143	1215	234	931	1334	1335
	ENSMUSG00000007050.18	Lsm2	-0.0148045	3.36027	0.0107015	0.918047	1	61	91	62	59	74	69	67	75	13	66	71	71
	ENSMUSG00000007080.15	Pole	-0.062251	5.16981	0.317411	0.575842	0.906764	195	290	198	221	294	261	280	268	47	218	234	278
	ENSMUSG00000007097.15	Atp1a2	0.628409	8.57493	15.3034	0.000692002	0.0597513	2703.12	2964.69	1764.51	3477.49	2963.88	2440.11	2462.38	1711.53	251.83	1813.45	1679.53	1587.51
	ENSMUSG00000007107.7	Atp1a4	0.941156	-1.42375	0.770589	0.384493	0.778578	0	1	0	2	0	0	0	1	0	0	0	0
	ENSMUSG00000007122.12	Casq1	0.936643	6.55966	11.9228	0.00262999	0.125219	1085	853	271	985	848	608	508	457	38	461	362	383
	ENSMUSG00000007207.11	Stx1a	-0.0906358	1.45851	0.0820199	0.775849	0.996979	12	15	21	14	15	16	17	20	1	13	24	13
	ENSMUSG00000007209.5	Ceacam9	0	-1.62419	0	1	1	0	0	0	0	0	0	0	0	0	0	0	0
	ENSMUSG00000007216.7	Zfp775	0.366686	2.50925	3.3567	0.0732619	0.548931	31	52	32	34	38	26	33	24	4	21	32	29
	ENSMUSG00000007279.15	Scube2	0.220801	0.544259	0.25383	0.616741	0.930844	5	7	2	15	9	5	4	7	0	11	3	7
	ENSMUSG00000007338.11	Mrpl49	-0.0114898	3.81619	0.00731105	0.955873	1	96	126	102	112	91	87	95	79	23	116	116	100
	ENSMUSG00000007379.16	Dennd2c	0.224186	5.37105	4.67933	0.0356375	0.430518	384	447	401	472	429	372	374	378	70	344	338	355
	ENSMUSG00000007411.17	Mark3	0.0472662	6.50836	0.328409	0.569325	0.903365	629	823	625	633	710	567	664	640	119	584	652	685
	ENSMUSG00000007415.16	Gatad1	-0.0312168	5.3491	0.102628	0.750115	0.986429	232.41	372	293.47	242.39	305.91	246.24	311.45	278.74	49.5	279.91	319.44	260.22
	ENSMUSG00000007440.11	Pcdha11	0.285102	-1.33617	0.0467284	0.830097	1	0	2.21	0	0	0	0	1.41	0	0	0	0	0
	ENSMUSG00000007458.15	M6pr	-0.246652	7.33916	6.25176	0.0159468	0.314512	789.88	1141.82	1032.91	662.88	1141.78	781.95	1132.86	1047.9	196.93	853.51	1244.8	1253.2
	ENSMUSG00000007476.19	Lrrc8a	0.115852	5.96877	1.64505	0.205913	0.662338	374.86	496.66	405.34	416.98	417.13	401.68	415.21	391.53	75	361.09	379.09	387.74
	ENSMUSG00000007480.6	Mc5r	0.11289	3.93634	0.656032	0.42204	0.811653	99	130	109	128	102	71	91	84	21	104	105	100
	ENSMUSG00000007564.16	Ppp2r1a	0.0630135	7.08852	0.390264	0.535177	0.884644	873	1089	925	911	1120	1039	985	930	199	795	1035	976
	ENSMUSG00000007570.17	Fance	0.39289	4.39713	1.74936	0.201378	0.662338	142	137	115	115	152	178	115	85	18	100	118	130
	ENSMUSG00000007589.10	Tinf2	-0.0955745	4.86306	0.790579	0.378446	0.773652	184.6	205.26	200.5	141.98	222.42	165.13	219.28	192.98	33.79	173.87	194.11	233.92
	ENSMUSG00000007591.16	Tssk4	0.451717	0.652936	1.63584	0.207165	0.662338	6	12	13	8	16	12	10	9	0	7	9	8
	ENSMUSG00000007594.11	Hapln4	0.550208	-0.447964	0.810966	0.372418	0.773462	4	6	4	3	3	0	0	1	2	2	1	5
	ENSMUSG00000007603.10	Dus3l	0.187674	4.46861	1.94599	0.169567	0.662338	166	184	110	164	178	145	141	131	35	125	121	153
	ENSMUSG00000007610.16	Gtpbp3	0.110035	4.18079	0.571355	0.453487	0.838544	101	131	115	119	120	118	101	101	28	82	135	111
	ENSMUSG00000007613.16	Tgfbr1	0.0188379	5.80763	0.0271297	0.869877	1	381	466	369	366	426	281	398	366	75	340	365	394
	ENSMUSG00000007617.19	Homer1	0.107269	4.93571	0.931913	0.339299	0.745263	188	278	239	183	250	215	244	227	42	160	213	199
	ENSMUSG00000007646.14	Rad51c	0.455801	1.51204	2.90383	0.0949621	0.58946	13	30	23	22	16	27	16	18	4	14	17	13
	ENSMUSG00000007653.13	Gabrb2	-0.262961	-0.595458	0.152366	0.698045	0.956658	0	5	1	2	5	0	2	5	1	3	1	1
	ENSMUSG00000007655.17	Cav1	-0.186151	7.70682	2.15942	0.151053	0.662338	1208	2005	1461	1390	1483	1011	1685	1508	304	1571	1454	1799
	ENSMUSG00000007656.14	Arpp19	0.0654621	5.8197	0.299457	0.586875	0.912919	347	509	379	419	447	377	450	412	66	336	395	417
	ENSMUSG00000007659.19	Bcl2l1	-0.0950649	6.67977	0.607012	0.440659	0.827805	524	644	494	409	572	494	594	567	95	444	615	631
	ENSMUSG00000007670.11	Khsrp	-0.140316	7.07912	2.41413	0.126942	0.62519	737	1119	859	796	845	675	981	901	174	818	916	989
	ENSMUSG00000007682.8	Dio2	0.350056	3.51606	4.13373	0.0476963	0.487385	77	103	74	65	91	82	77	51	7	69	83	53
	ENSMUSG00000007721.7	Ccdc124	0.215649	4.46633	1.51307	0.228222	0.662338	149	168	116	129	156	155	139	127	20	108	134	134
	ENSMUSG00000007739.11	Cct4	-0.0307869	6.712	0.109971	0.741649	0.982108	688	908	625	641	850	768	800	720	154	641	827	808
	ENSMUSG00000007777.10	0610009B22Rik	-0.0618889	2.66254	0.113831	0.737324	0.979579	49	79	38	38	44	42	49	42	8	52	57	53
	ENSMUSG00000007783.11	Cpt1c	-0.122473	2.9174	0.482531	0.491953	0.857517	35	68	41	39	32	36	42	41	12	42	41	53
	ENSMUSG00000007805.5	Twist2	0.0880824	2.78831	0.191563	0.66362	0.938773	39.18	59.05	31.66	51.42	34.09	28.22	42.78	30.13	10.3	32.08	32.3	47.13
	ENSMUSG00000007812.17	Zfp655	-0.0668649	5.64701	0.165996	0.687236	0.951085	287	473	405	392	431	272	403	392	66	388	423	379
	ENSMUSG00000007815.14	Rhoa	-0.0945284	8.39331	0.880887	0.35275	0.75627	1840.25	2621.76	2074.16	1675.29	2244.12	1737.69	2434.79	2104.47	370.43	1780.19	2316.13	2408.88
	ENSMUSG00000007817.16	Zmiz1	-0.200427	7.80575	2.69772	0.109099	0.599682	1296.3	2058.63	1496.54	1604.35	1614.7	1026.21	1887.68	1814.78	311	1552.82	1613.75	1831.68
	ENSMUSG00000007827.11	Ankrd26	-0.0335908	3.426	0.0567815	0.812691	1	66	101	67	62	70	56	75	64	14	65	74	79
	ENSMUSG00000007833.16	Aldh16a1	0.0891304	5.04354	0.270206	0.607546	0.926422	215.67	210.83	187	183.25	217.07	246.47	187.54	218	34	170.74	226.86	211.2
	ENSMUSG00000007836.7	Hnrnpa0	0.242894	7.00996	1.61789	0.217834	0.662338	731	847	673	691	908	822	710	631	127	558	712	708
	ENSMUSG00000007837.12	Prrg2	-0.0123769	3.30843	0.00698458	0.951859	1	65	100	77	72	93	55	97	78	14	72	60	80
	ENSMUSG00000007850.17	Hnrnph1	0.0495959	7.56451	0.18984	0.665191	0.939327	1315.92	1492	1201	1056.93	1333.88	1150.97	1148	1036	227	1140.89	1400.91	1397.91
	ENSMUSG00000007867.10	Ift43	0.361899	2.33246	3.07471	0.0860277	0.565691	30	35	43	29	57	28	27	24	3	29	40	28
	ENSMUSG00000007872.4	Id3	0.505701	5.2796	11.539	0.00185548	0.102102	296	304	238	302	327	383	238	212	36	196	245	233
	ENSMUSG00000007877.3	Tcap	1.02923	7.02659	13.9059	0.0013997	0.0891976	1126	963	433	1127	1237	914	656	460	45	514	401	531
	ENSMUSG00000007880.17	Arid1a	-0.13572	7.79324	2.43078	0.125672	0.623496	1313	2009	1519	1358	1489	1173	1652	1665	301	1451	1705	1611
	ENSMUSG00000007888.16	Crlf1	0.496686	2.92299	6.57401	0.0135994	0.293404	45	92	59	75	43	84	57	47	8	42	36	57
	ENSMUSG00000007891.17	Ctsd	-0.318157	8.79858	10.5716	0.00212546	0.110231	2647	3552	2714	2821.29	2903	2242	3355	3425	732	2772	3659	3993
	ENSMUSG00000007892.9	Rplp1	0.209132	8.35525	1.23279	0.279893	0.681418	2452.68	3009.32	2268.86	2797.76	3033.64	2702.67	2576.7	2403.88	440.85	2081.88	2353.62	2431.58
	ENSMUSG00000007908.15	Hmgcll1	0.259578	1.84725	1.17345	0.28421	0.685868	31.95	29	20	24	24	18	26	23	4	20	18	15
	ENSMUSG00000007944.9	Ttc9b	0.741871	-0.764393	1.16395	0.286144	0.688302	2.21	2.33	4.46	0	2.46	2.35	2.21	1.2	0	1.11	0	2.43
	ENSMUSG00000007946.12	Phox2a	0.0884494	-0.592111	0.0162492	0.899109	1	3	2	1	0	4	1	2	1	0	0	4	2
	ENSMUSG00000007950.10	Abhd8	0.0969993	3.53993	0.419595	0.520286	0.875578	53	93	66	84	93	89	74	80	11	58	82	88
	ENSMUSG00000007987.13	Ift22	-0.453849	4.20199	11.844	0.00122306	0.0828119	74	128	97	64	111	75	122	131	28	93	127	138
	ENSMUSG00000007989.8	Fzd3	0.203039	3.58582	1.66292	0.203509	0.662338	95	124	82	108	95	61	92	90	11	61	82	94
	ENSMUSG00000008028.16	1700008O03Rik	1.53276	-1.39763	2.2387	0.141269	0.65129	1	2	2	0	0	0	0	0	0	1	0	0
	ENSMUSG00000008035.13	Mid1ip1	0.325136	5.89016	10.3941	0.00229879	0.116172	438	471	398.35	451	443	357.86	390	355	63.37	294	401	278
	ENSMUSG00000008036.12	Ap2s1	0.0288499	5.61621	0.0352793	0.852372	1	303	330	243	218	351	348	288	304	46	246	339	338
	ENSMUSG00000008090.15	Fgfrl1	0.44096	3.25129	6.96827	0.0112174	0.270052	60	59	60	81	66	57	56	40	5	41	54	55
	ENSMUSG00000008129.15	Brme1	-0.115035	0.257712	0.0779774	0.78128	0.99933	7	7	9	7	6	8	3	6	0	15	11	7
	ENSMUSG00000008136.15	Fhl2	0.158892	3.8707	1.32922	0.254765	0.662338	119	149	96	112	142	134	111	123	19	121	105	107
	ENSMUSG00000008140.19	Emc10	0.0896288	5.27024	0.656041	0.422037	0.811653	232	292	251	234	261	222	246	258	52	171	260	216
	ENSMUSG00000008153.13	Clstn3	0.579053	2.16421	5.33229	0.02537	0.384488	40	20	31	27	21	21	13	20	2	25	13	21
	ENSMUSG00000008167.15	Fbxw9	0.326148	3.90742	4.18942	0.0462823	0.480812	104.76	115.31	106.16	100.51	145.87	94.22	83.64	97.24	22	66.8	90	94.32
	ENSMUSG00000008193.14	Spib	-0.368129	2.01416	2.04751	0.15906	0.662338	37	17	22	14	19	12	22	26	3	26	34	27
	ENSMUSG00000008200.16	Fnbp4	0.0552331	6.70419	0.435935	0.512309	0.870769	689	864	723	633	845	593	725	688	141	633	697	698
	ENSMUSG00000008206.17	Cers4	0.340991	6.99145	12.0763	0.00110756	0.0793301	1007.47	1230.81	1180.02	1064.11	1315	863.71	894.63	884	158	987	737	883
	ENSMUSG00000008226.15	Scrn3	0.246098	3.3935	2.42777	0.1259	0.623496	74	105	87	87	95	77	81	64	14	78	74	71
	ENSMUSG00000008301.12	Phax	-0.0301781	4.22886	0.0605917	0.813005	1	131.55	135.12	116.61	104.79	146.37	109	126	135.69	29	103.73	127	129.42
	ENSMUSG00000008305.19	Tle1	0.350017	4.7174	8.28858	0.00598408	0.191906	220.28	210	150	182.25	188.56	163	163.35	151	28	145	133	138
	ENSMUSG00000008307.12	1700109H08Rik	-0.0390839	2.7042	0.0369253	0.848444	1	36	60	43	49	66	19	44	49	14	46	42	37
	ENSMUSG00000008318.11	Relt	-0.221235	3.6635	1.60328	0.211669	0.662338	50	81	57	41	78	47	64	60	17	41	86	83
	ENSMUSG00000008333.13	Snrpb2	-0.242287	4.41209	3.35336	0.0734005	0.548931	132	178	133	89	171	129	178	169	33	142	158	165
	ENSMUSG00000008348.10	Ubc	-0.214846	7.676	1.52415	0.230509	0.662338	1120.08	1739.72	1429.42	1168.98	1812.15	947.24	1494.35	1656.55	366.16	1360.55	1465.99	1540.31
	ENSMUSG00000008373.17	Prpf31	-0.117213	5.12074	1.08496	0.30291	0.706352	188.73	264.63	191.71	175.16	221.08	183.67	236.8	224.71	41	175.88	235.69	238.09
	ENSMUSG00000008384.9	Sertad1	0.201547	4.98132	1.52103	0.227269	0.662338	246	199	169	160	226	220	176	191	37	139	201	182
	ENSMUSG00000008393.10	Carhsp1	0.0684695	6.86592	0.579197	0.450423	0.836033	684.47	845.23	761.55	559.33	795.82	658.86	747.55	690.55	117	563.68	742.47	749.56
	ENSMUSG00000008398.17	Elk3	-0.391727	6.06821	13.1484	0.00070518	0.0605111	308.65	452.91	365.81	244.31	443.37	316.32	484.28	499.38	75.25	376.68	497.07	514.99
	ENSMUSG00000008429.9	Herpud2	0.016182	5.77971	0.0314238	0.860059	1	361	530	389	379	443	320	428	415	73	376	389	382
	ENSMUSG00000008435.16	Rdh13	0.142858	4.83597	1.61463	0.210085	0.662338	211	305	224	262	264	220	257	233	38	206	207	233
	ENSMUSG00000008438.4	Adam21	-1.00567	-0.396882	3.71276	0.0600458	0.517298	3	2	5	1	3	1	5	5	2	8	4	2
	ENSMUSG00000008450.9	Nutf2	-0.385661	3.64766	4.4186	0.0419955	0.461654	37.61	111.84	69.4	69.42	79.07	54.33	56.26	101.15	14.27	66.63	123.71	112.7
	ENSMUSG00000008461.7	Fut1	0.0298275	2.96519	0.0387662	0.920491	1	83	83	76	87	85	67	78	86	13	69	76	91
	ENSMUSG00000008475.14	Arpc5	-0.292963	7.54811	9.77894	0.00302428	0.134035	917.98	1517	1237	877	1370	909	1375	1346	259	1121	1561	1536
	ENSMUSG00000008482.10	Rnf151	-0.0519317	-0.83822	0.00628251	0.93716	1	2	2	2	2	2	1	2	4	0	1	2	1
	ENSMUSG00000008489.19	Elavl2	0.276557	-1.17858	0.1009	0.752157	0.987375	1	0	3	0	1	2	0	1	0	1	3	0
	ENSMUSG00000008496.20	Pou2f2	-0.659131	4.82044	16.9962	0.000239544	0.033485	107	201	170	68	116	88	183	180	47	125	216	246
	ENSMUSG00000008540.12	Mgst1	0.193316	5.63416	1.59887	0.216697	0.662338	388	500	387	338	476	304	357	346	65	293	382	362
	ENSMUSG00000008575.18	Nfib	0.0334695	8.66037	0.120489	0.730052	0.975814	2790	4024	2845	3304	3265	2396	3318	3051	564	3040	2635	3043
	ENSMUSG00000008601.13	Rab25	0.115657	5.47636	1.02593	0.316294	0.721145	450	569	486	521	507	403	487	477	79	469	417	429
	ENSMUSG00000008604.12	Ubqln4	0.133974	5.70434	1.63919	0.20671	0.662338	374	493	393	378	388	351	410	349	63	331	394	345
	ENSMUSG00000008658.17	Rbfox1	0.418786	3.89938	2.55994	0.124682	0.621655	91	173	64	139	140	60	95	88	9	82	71	86
	ENSMUSG00000008668.16	Rps18	0.221176	8.49118	4.20079	0.0459993	0.480124	2476.59	2885.98	2201.14	2364.32	3032.51	2347.51	2335.68	2220.26	406	1948.81	2303.33	2223.7
	ENSMUSG00000008682.14	Rpl10	0.0287356	8.30241	0.0339328	0.855417	1	2193.92	3188.45	2352.66	2413.4	2882.33	2288.1	2660.48	2591.85	423.99	2198.06	2691.09	2608.33
	ENSMUSG00000008683.17	Rps15a	0.166377	7.22123	2.26693	0.138842	0.648072	1160.62	1551	1093.61	1204.01	1475.29	1059.52	1188.53	1084.43	191.22	1000.86	1218.55	1193.24
	ENSMUSG00000008690.16	Ncaph2	0.138449	6.28742	2.20223	0.144476	0.658412	518.34	707.51	501.61	524.8	648.98	512.74	506.05	568.56	92.25	448.08	515.43	565.04
	ENSMUSG00000008730.18	Hipk1	-0.052634	8.03137	0.286515	0.594982	0.917434	1574	2288	1889.82	1610.05	1880.36	1311.21	2008.39	1709	356.81	1672.67	1769.35	1844
	ENSMUSG00000008734.10	Gprc5b	0.304075	5.12365	8.01721	0.00679579	0.205768	260	318.29	181.3	265	237	183.93	212	193.82	31	182.84	204.68	197
	ENSMUSG00000008763.17	Man1a2	-0.0214516	6.37299	0.0593136	0.808642	1	595	744	638	586	686	491	687	626	123	570	659	605
	ENSMUSG00000008813.14	Tppp2	-0.15988	-1.32049	0.0277574	0.868394	1	0	1	0	0	1	1	2	1	0	0	0	0
	ENSMUSG00000008822.16	Acyp1	0.388785	1.6026	2.37213	0.130214	0.630924	25	22	18	17	22	27	15	16	6	19	17	12
	ENSMUSG00000008843.5	Cldn13	-1.25515	-0.820475	1.38666	0.245587	0.662338	0	0	0	0	0	0	0	0	0	0	1	0
	ENSMUSG00000008845.10	Cd163	0.671794	5.09041	6.66154	0.018136	0.332401	459	331	173	326	239	131	234	149	26	200	149	154
	ENSMUSG00000008855.18	Hdac5	0.0738408	6.50332	0.517122	0.475627	0.849417	736	874	649	750	706	546	735	668	116	599	690	735
	ENSMUSG00000008859.9	Rala	-0.174185	5.27776	2.41533	0.12685	0.624913	246	321	266	237	293	218	300	282	77	255	294	283
	ENSMUSG00000008874.4	Clec3a	0.524651	1.46807	3.45531	0.0693065	0.548931	26	21	13	28	14	24	14	15	1	13	12	23
	ENSMUSG00000008892.13	Vdac3	-0.0144313	6.20869	0.0240699	0.877371	1	465.87	624.66	411.18	428.42	532.34	422.99	522.02	488.79	95.56	363.71	513.84	530.53
	ENSMUSG00000008932.11	Slc1a7	0.0784411	-0.532337	0.0201248	0.89317	1	3	2	3	2	2	5	4	4	1	1	1	3
	ENSMUSG00000008958.15	Vps72	0.0275092	4.93447	0.0482917	0.827013	1	197	289	172	207	251	165	241	214	32	200	198	208
	ENSMUSG00000008976.17	Gabpa	-0.0171709	5.67187	0.0335885	0.855372	1	346.09	475	409	377	440	274.24	407.31	372	70	349	408	427
	ENSMUSG00000008999.8	Bmp7	-0.049154	4.51494	0.144439	0.705617	0.961314	204	251	198	221	217	136	202	237	38	208	234	175
	ENSMUSG00000009013.6	Dynll1	0.0231983	6.99119	0.0473559	0.82867	1	907	1416	1119	1171	1128	1053	1136	1098	199	937	1404	1072
	ENSMUSG00000009030.15	Pdcl	-0.032979	4.73746	0.0955261	0.75863	0.990621	163	220	170	174	229	172	202	188	31	172	216	201
	ENSMUSG00000009035.16	Tmem184b	-0.14571	6.16751	1.26771	0.26773	0.666391	360	543	543	265	475	297	477	447	82	382	494	489
	ENSMUSG00000009047.5	Gm5965	1.61493	-0.00599691	8.79161	0.00539513	0.184815	2.19	23.24	12.35	19.06	12	7.66	9.66	0	0	8	3.22	0
	ENSMUSG00000009070.15	Rsph14	-0.784808	-1.50601	0.566993	0.47887	0.849417	0	0	0	0	1	0	1	0	0	1	0	0
	ENSMUSG00000009073.17	Nf2	0.166737	6.48145	2.62045	0.112175	0.599682	591	780	574	558	648	557	593	523	123	489	569	506
	ENSMUSG00000009075.3	Cabp7	0.20438	0.406933	0.253949	0.616659	0.930829	5.19	10.6	5.59	3.28	11.22	4.38	9.72	2.12	0	5.49	6.37	6.58
	ENSMUSG00000009076.11	Zmat5	-0.156827	2.58624	0.67643	0.414965	0.804691	27.81	38.4	31.41	28.72	44.78	28.62	40.28	35.88	7	19.51	37.63	53.42
	ENSMUSG00000009079.17	Ewsr1	-0.153278	7.32374	2.74578	0.104162	0.599682	863.95	1384.11	978.81	913.78	1058.75	707.49	1124.98	1036.97	209	941.89	1150.76	1151.75
	ENSMUSG00000009090.18	Ap1b1	0.0232594	7.02944	0.056722	0.812788	1	800	1168	910	951	1070	885	1002	1003	165	850	939	1017
	ENSMUSG00000009092.6	Derl3	0.503333	0.423334	2.0323	0.160585	0.662338	10	12	10	7	10	6	10	9	0	2	6	7
	ENSMUSG00000009093.8	Gstt4	-0.598423	-1.37252	0.336898	0.564393	0.900447	0	0	2	0	0	0	0	1	0	1	1	0
	ENSMUSG00000009097.11	Tbx1	0.317569	4.89302	6.47515	0.0142777	0.297813	251	278	234	290	287	251	240	233	32	218	194	211
	ENSMUSG00000009108.16	Gnat2	0.252528	-0.188414	0.26461	0.609377	0.927267	3	4	6	6	4	3	4	1	0	6	3	5
	ENSMUSG00000009112.5	Bcl2l13	0.0168553	6.35734	0.0352432	0.851894	1	627	794.7	615.89	659	685	557	744	654	102	650.18	620	659.9
	ENSMUSG00000009114.18	2610028H24Rik	0	-1.55877	0	1	1	0	0	0	0	0	0	0	0	0	0	0	0
	ENSMUSG00000009115.6	Spatc1l	-0.11051	-1.50564	0.0115216	0.917965	1	0	0	1	0	0	0	0	0	0	0	1	0
	ENSMUSG00000009145.7	Dqx1	0.11828	0.78317	0.120838	0.729677	0.975614	11	15	6	5	17	19	13	5	3	10	10	17
	ENSMUSG00000009185.3	Ccl8	-0.878758	5.85938	11.482	0.00303965	0.134035	211	417	343	148	443	214	527	497	89	402	588	720
	ENSMUSG00000009207.16	Lnpk	0.0478801	5.16166	0.133839	0.716275	0.966492	251	333	241	293	379	228	288	271	44	290	265	295
	ENSMUSG00000009210.11	Prr29	0.936701	-0.296855	2.83272	0.0989832	0.599682	4	7	1	7	3	5	5	2	0	2	0	3
	ENSMUSG00000009214.10	Mymk	-0.76022	-0.733803	1.17264	0.284375	0.686091	3	0	1	3	1	1	1	5	0	3	3	2
	ENSMUSG00000009216.8	Fam163b	-2.4439	-1.47633	4.70358	0.0358007	0.430789	0	0	0	0	0	0	0	1	1	1	0	0
	ENSMUSG00000009246.15	Trpm5	0.601233	-0.593616	0.753698	0.389712	0.783379	0	5	3	2	3	0	1	2.08	0	0	2	2
	ENSMUSG00000009248.7	Ascl2	0.0526543	0.734114	0.028915	0.865704	1	11	19	9	12	13	7	13	15	3	8	10	9
	ENSMUSG00000009281.7	Rarres2	-0.158681	6.16144	1.62372	0.210075	0.662338	348.01	503.7	490.38	223.28	549.05	388.28	497.82	427.51	103.49	349.04	522.71	473.92
	ENSMUSG00000009291.14	Pttg1ip	0.225649	6.83158	5.2967	0.0258384	0.385346	707	890	680	694	834	756	723	669	108	587	697	657
	ENSMUSG00000009292.19	Trpm2	-0.31218	3.38415	3.21311	0.0794773	0.548931	54	49	51	28	34	53	47	58	10	43	68	68
	ENSMUSG00000009293.18	Ube2g2	0.230803	5.62338	3.36838	0.0733189	0.548931	353	393	283	368	298	298	305	283	55.8	245	317	270
	ENSMUSG00000009350.14	Mpo	0.0852561	3.70954	0.0260798	0.873392	1	102.41	28.76	31.53	36.88	29	23	40.95	38.64	14	37	28	45
	ENSMUSG00000009356.13	Lpo	-0.0193171	-1.03013	0.000843117	0.976958	1	0	1	2	3	2	2	4	0	0	2	1	2
	ENSMUSG00000009376.16	Met	-0.232992	5.67515	3.86211	0.0553038	0.504011	275	468	377	276	383	291	419	374	72	319	473	453
	ENSMUSG00000009378.5	Slc16a12	0.59428	1.15518	3.663	0.0617237	0.52341	20	15	30	8	18	14	15	11	1	13	10	11
	ENSMUSG00000009394.14	Syn2	0.295709	0.776805	0.792016	0.378017	0.773462	5	11	10	7	10	12	6	6	3	7	9	7
	ENSMUSG00000009406.14	Elk1	-0.208076	4.08519	2.8188	0.0997927	0.599682	96	134	104	80	130	62	127	106	23	109	104	128
	ENSMUSG00000009418.17	Nav1	-0.00558395	7.06935	0.00339137	0.953808	1	761.72	1237.87	814.78	795.59	837.86	607.53	936.62	882.27	152.56	744.16	788.71	858.09
	ENSMUSG00000009470.18	Tnpo1	-0.163851	7.63322	2.16822	0.147621	0.662338	1144.54	1779.83	1468.62	1145.05	1343.52	915.88	1497.3	1417.6	290.81	1246.57	1417.07	1560.85
	ENSMUSG00000009471.5	Myod1	-0.148567	2.55358	0.412343	0.523901	0.87731	35	41	26	35	36	21	29	37	7	21	47	45
	ENSMUSG00000009487.11	Otog	0.938431	-1.4237	0.75179	0.390308	0.783713	2	1	0	0	0	0	0	0	0	1	0	0
	ENSMUSG00000009535.14	Rnmt	0.0376118	5.13014	0.110749	0.740771	0.981625	201	293	218	243	274	207	261	211	36	210	237	273
	ENSMUSG00000009545.15	Kcnq1	-0.146252	0.326164	0.113065	0.738175	0.980059	8	7	2	3	6	5	6	8	0	8	4	4
	ENSMUSG00000009549.15	Srp14	0.379471	4.5661	6.03323	0.0188186	0.337498	203	175	137	149	182	194	163	118	13	110	163	159
	ENSMUSG00000009551.3	6330409D20Rik	-1.08052	0.525924	7.0269	0.010903	0.266126	5	7	6	4	3	2	13	12	4	2	10	8
	ENSMUSG00000009555.17	Cdk9	-0.0403188	5.67514	0.145775	0.704324	0.960422	319	363	276	247	377	302	329	314	60	271	347	366
	ENSMUSG00000009563.17	Tor2a	-0.191059	4.2023	2.71228	0.106238	0.599682	96	136.73	118	128	139	95.49	141	126.98	31	116	136	144
	ENSMUSG00000009566.13	Fpgs	0.33046	4.31164	6.14242	0.0168387	0.32158	135	169	152	138	165	128	127	116	16	111	136	115
	ENSMUSG00000009569.15	Mrtfb	-0.123699	6.23526	1.11923	0.295782	0.698351	421	745	521	583.92	574	351.77	607	597	113	532	526	585
	ENSMUSG00000009575.15	Cbx5	0.041945	7.34956	0.195272	0.660588	0.936903	956	1356	1050	948	1121	1042	1157	1076	176	944	1066	1112
	ENSMUSG00000009580.16	Odam	-0.106953	-1.56449	0.0115106	0.917965	1	0	0	0	1	0	0	1	0	0	0	0	0
	ENSMUSG00000009585.19	Apobec3	-0.307309	7.1144	6.05422	0.0189088	0.338189	636.44	972.34	920.19	413.72	940.1	630.73	988.09	891.52	170.28	670.73	1113.12	1004.01
	ENSMUSG00000009588.10	St6galnac1	-1.25801	-1.56343	1.89123	0.215017	0.662338	0	0	0	0	0	0	0	1	0	0	0	0
	ENSMUSG00000009596.10	Taf7l	-0.960797	-1.37136	0.863384	0.357533	0.759939	0	1	0	1	0	0	0	3	0	1	0	0
	ENSMUSG00000009614.17	Sardh	0.0902789	2.83577	0.169665	0.682279	0.948442	36	49.98	31.9	34	33	40.77	34	26.71	9	42	30	39.34
	ENSMUSG00000009621.19	Vav2	-0.125966	4.6337	0.975383	0.32839	0.734471	131	151	121	118	133	112	137	119	33	95	151	183
	ENSMUSG00000009628.15	Tex15	-0.556592	1.40268	3.76442	0.058357	0.512038	15	14	22	23	14	11	23	23	9	19	31	18
	ENSMUSG00000009630.11	Ppp2cb	0.0695004	4.95713	0.42595	0.517157	0.874031	214	270	202	204	216	211	202	233	30	184	226	235
	ENSMUSG00000009633.4	G0s2	0.442843	1.46743	2.2486	0.140413	0.650174	27	19	15	11	19	14	15	18	2	12	15	5
	ENSMUSG00000009640.12	Dmap1	0.198585	3.81648	1.8623	0.178847	0.662338	90	95	82	86	117	103	100	78	14	72	94	81
	ENSMUSG00000009646.14	Pla2g12b	2.79106	-1.32118	6.2472	0.0164252	0.317752	1	2	1	0	1	0	0	0	0	0	0	0
	ENSMUSG00000009647.14	Mcu	0.0591018	5.27985	0.263254	0.610293	0.927839	279.91	349.97	257	329	318.91	174	298	273.97	42	268	286	262
	ENSMUSG00000009654.5	Oit3	-0.948707	-0.564463	2.32545	0.133964	0.638281	0	1	3	3	3	1	4	2	1	2	9	1
	ENSMUSG00000009670.12	Tex11	-0.77368	-1.56362	0.558718	0.47887	0.849417	0	0	0	0	0	1	0	1	0	1	0	0
	ENSMUSG00000009681.11	Bcr	0.213057	6.13398	5.04411	0.0294422	0.404227	432	541	464	388	558	448	426	371	78	351	460	434
	ENSMUSG00000009687.15	Fxyd5	-0.601384	6.46294	10.9741	0.00332075	0.141252	366	760	585	261	567	275	742	663	144	528	797	704
	ENSMUSG00000009731.5	Kcnd1	-0.222216	1.57939	0.651469	0.423647	0.81321	21	19	12	9	17	19	18	25	0	20	19	19
	ENSMUSG00000009733.10	Tfcp2	-0.0318692	3.75594	0.0501021	0.823854	1	82	125	101	89	95	75	98	101	13	99	112	83
	ENSMUSG00000009734.19	Pou6f2	1.14315	-1.59396	1.56666	0.264342	0.662338	0	0	1	0	0	0	0	0	0	0	0	0
	ENSMUSG00000009739.18	Pou6f1	0.198931	4.50151	2.46674	0.122977	0.618343	152	192	121	135	157	127	146	116	27	116	118	138
	ENSMUSG00000009741.16	Ubp1	0.020812	6.55164	0.0515379	0.821391	1	598.59	793.18	616.74	570.24	746.99	464.26	634.12	597	128.48	607.24	563.48	638.35
	ENSMUSG00000009772.16	Nuak2	-0.0244154	5.59579	0.0421359	0.838246	1	306	389	339	312	438	304	347	339	79	295	354	395
	ENSMUSG00000009828.16	Cilk1	-0.143102	4.45568	1.1577	0.287426	0.689486	115	211	132	162	136	98	173	143	31	159	137	160
	ENSMUSG00000009863.15	Sdhb	0.0774458	5.38637	0.274016	0.604394	0.924104	291	317	187	256	381	292	286	287	33	238	309	311
	ENSMUSG00000009876.14	Cox4i2	0.847523	-0.683029	1.53587	0.221376	0.662338	2	6	2	2	3	1	1	1	1	3	1	0
	ENSMUSG00000009894.16	Snap47	0.00878412	3.58124	0.00328872	0.954511	1	78.9	97	60	101	90.09	87	82	79	20	76	96	86
	ENSMUSG00000009900.8	Wnt3a	0.110818	2.0751	0.173986	0.678949	0.94723	29	47	34	37	33	39	41	37	11	30	22	30
	ENSMUSG00000009905.6	Kdsr	0.146679	5.52942	2.34428	0.132436	0.634753	353	463	359	423	425	285	380	352	61	354	328	330
	ENSMUSG00000009907.18	Vps4b	-0.0991598	6.68708	1.44232	0.235771	0.662338	678.92	954.77	758.92	766.94	897.88	582	904.96	798.93	159.95	745.95	796.92	859
	ENSMUSG00000009927.10	Rps25	0.0388929	7.54841	0.0427774	0.838219	1	1193.23	2115.51	1566.56	1589.35	1754.6	1144.1	1681.32	1526.24	246.93	1389.56	1613.44	1485.88
	ENSMUSG00000009941.11	Nxf2	0.148635	-1.11216	0.025096	0.874806	1	0	2	1	0	1	0	0	2	0	0	0	1
	ENSMUSG00000009995.18	Taz	0.117281	5.22483	1.23966	0.271189	0.670948	292	322	240	288	347	257	261	259	45	226	321	301
	ENSMUSG00000010021.14	Kif19a	0.0932585	1.4216	0.10606	0.799932	1	10	10	13	9	16	11	13	8	1	6	16	13
	ENSMUSG00000010025.20	Aldh3a2	-0.0376993	5.57972	0.159121	0.691771	0.953418	297	494	325	322	369	238	374	342	62	323	334	367
	ENSMUSG00000010044.13	Zmynd10	-1.58529	-0.783966	4.86024	0.0324053	0.414624	1	2	1	1	0	0	1	2	1	4	3	3
	ENSMUSG00000010045.3	Tmem115	0.059062	5.06093	0.238715	0.627404	0.931721	228	276	223	212	269	185	214	229	52	186	236	217
	ENSMUSG00000010047.13	Hyal2	0.000678795	4.15964	2.47534e-05	0.996051	1	124	160	117	130	121	115	115	150	26	91	149	132
	ENSMUSG00000010048.11	Ifrd2	0.334517	4.83563	3.91648	0.0575264	0.508612	194.3	181.08	158	208.65	223.1	267.3	176.23	156.69	40.17	129.93	192.96	152.75
	ENSMUSG00000010051.16	Hyal1	-0.289418	4.62081	4.55795	0.0380009	0.441617	165.7	247.44	187.65	200.87	147.71	89.39	207.44	212.92	51.39	172.78	199.47	219.31
	ENSMUSG00000010054.5	Tusc2	-0.0143164	3.84046	0.0107331	0.917927	1	89.35	117.4	87.26	97.44	108.49	88.64	97.55	91.16	18.77	92.88	115.75	98.29
	ENSMUSG00000010057.9	Nprl2	0.0548214	2.71012	0.0971709	0.756628	0.989785	62	64	45	43	46	46	44	47	9	53	64	38
	ENSMUSG00000010064.16	Slc38a3	0.48132	3.06306	2.43482	0.133414	0.636798	66	90	19	101	71	39	49	39	5	53	36	58
	ENSMUSG00000010066.16	Cacna2d2	-0.147584	-0.1876	0.0830938	0.774413	0.99691	3	3	1	5	7	2	2	5	1	3	6	3
	ENSMUSG00000010067.14	Rassf1	0.0690601	5.40148	0.37362	0.543978	0.887987	263.54	333.36	260.22	228.9	312.12	261.81	277.39	229.08	52.39	221.17	299.89	289.37
	ENSMUSG00000010080.16	Epn3	0.163426	5.02875	1.77388	0.189316	0.662338	360	378	347	507	375	309	372	367	64	319	324	327
	ENSMUSG00000010086.18	Rnf112	0.85543	-1.07178	0.856799	0.359357	0.761893	3	1	1	4	0	0	0	2	0	2	0	0
	ENSMUSG00000010095.14	Slc3a2	-0.157265	6.93163	2.45022	0.124206	0.621164	726	906	744	593	949	660	853	793	168	661	1008	918
	ENSMUSG00000010097.16	Nxf1	0.0134032	6.69232	0.0235502	0.878691	1	732	859	773	664	792	567	752	627	142	699	796	725
	ENSMUSG00000010110.18	Stx5a	0.0390472	5.87748	0.158397	0.692436	0.95374	388	545	430	430	410	313	459	380	74	383	409	414
	ENSMUSG00000010122.15	Slc47a1	0.61123	1.71329	4.27047	0.0443054	0.472519	19	29	18	27	31	15	23	21	3	10	7	14
	ENSMUSG00000010136.15	Pifo	-0.109681	-1.59383	0.0117073	0.917965	1	0	0	0	1	0	0	0	0	0	0	1	0
	ENSMUSG00000010142.13	Tnfrsf13b	-0.561177	3.95164	8.70897	0.00579184	0.189064	42	102	97	40	77	44	111	101	19	64	106	107
	ENSMUSG00000010154.8	Spire2	0.320626	1.42367	1.07519	0.305072	0.708521	18	10	24	14	19	17	13	17	1	6	18	18
	ENSMUSG00000010175.14	Prox1	-0.263267	3.93988	2.88968	0.0957474	0.592194	74	117	83	84	97	53	110	79	22	104	95	107
	ENSMUSG00000010205.12	Raver1	-0.195135	6.04272	2.17344	0.149571	0.662338	338.4	530.46	429.35	341.5	477.21	328.46	494.49	488.14	85.64	376.93	509.22	462.05
	ENSMUSG00000010277.8	2610507B11Rik	0.0235584	8.48498	0.0733736	0.787671	1	2120	3103	2519	2116	2727	2094	2649	2290	468	2069	2465	2480
	ENSMUSG00000010290.8	AI597479	-0.161623	4.14708	1.26819	0.265814	0.664286	119	179	125	128	121	83	183	139	18	113	146	144
	ENSMUSG00000010307.8	Tmem86a	-0.400276	4.8655	11.9548	0.00116644	0.0807125	118	184	159	139	161	110	197	214	36	149	172	224
	ENSMUSG00000010311.16	Optc	0.206559	0.586491	0.393196	0.533654	0.883791	15	16	11	12	14	9	12	11	4	12	9	8
	ENSMUSG00000010342.17	Tex14	-0.302695	1.64084	1.02971	0.315415	0.720342	16	11	15	5	22	19	19	23	6	15	11	19
	ENSMUSG00000010358.14	Ifi35	0.14358	6.31189	0.89363	0.35322	0.756523	436.91	547.64	489.11	261.74	641.12	478.85	449.84	368.75	84.64	330	533.39	472.87
	ENSMUSG00000010362.10	Rdm1	0.20475	2.54459	1.07443	0.305242	0.708715	51	52	33	42	43	40	37	30	10	32	46	39
	ENSMUSG00000010376.16	Nedd8	-0.0203138	4.94673	0.0229747	0.880184	1	204.95	265.97	159	171.87	197.97	196.98	206	182.94	37.89	181	238.97	205.98
	ENSMUSG00000010392.9	Gosr1	-0.055218	5.46264	0.343771	0.560461	0.897562	256	363	319	254	367	257	339	298	57	289	311	340
	ENSMUSG00000010406.13	Mrpl52	0.294499	4.78564	1.75143	0.20014	0.662338	183	197	145	153	233	269	155	165	33	128	194	168
	ENSMUSG00000010453.13	Kansl3	0.0949297	6.45042	1.13728	0.291667	0.693636	582	681	521	495	593	481	570	510	92	470	566	534
	ENSMUSG00000010461.17	Eya4	0.276242	3.63002	2.65668	0.109789	0.599682	74	128	80	126	107	73	79	80	18	93	69	72
	ENSMUSG00000010476.15	Ebf3	0.110278	4.06728	0.540411	0.465909	0.849015	122.85	110	98	125	93	79	108.87	98	11	110	88.95	99
	ENSMUSG00000010492.11	Uckl1os	0.255893	3.02004	1.73996	0.193524	0.662338	66	50	39.35	42.74	63.75	34	49	38	7	30	38	54.34
	ENSMUSG00000010505.17	Myt1	-0.10972	-1.56442	0.0119775	0.917965	1	0	0	1	0	0	0	0	0	0	0	0	1
	ENSMUSG00000010517.8	Faf1	0.0963291	5.70966	0.93175	0.339341	0.745275	389	479	376	456	473	447	467	386	71	389	419	424
	ENSMUSG00000010529.7	Gm266	0.679523	0.47801	2.24676	0.140571	0.650359	3	11	12	5	6	3	4	4	1	4	4	4
	ENSMUSG00000010538.15	Tsacc	0.195882	0.287525	0.197297	0.658947	0.936102	6	9	4	7	7	5	6	2	0	5	10	6
	ENSMUSG00000010554.15	Mettl16	0.0393043	5.04328	0.1412	0.708779	0.963191	214	282	194	225	240	232	245	214	43	219	225	224
	ENSMUSG00000010592.10	Dazl	1.16254	-1.07144	1.72679	0.195189	0.662338	1	3	0	1	3	1	0	0	0	2	1	0
	ENSMUSG00000010601.15	Apol7a	-0.114872	3.18764	0.486539	0.488906	0.855243	52	84.93	96.94	63	123.93	60	100.89	71	22	72.87	91	81.93
	ENSMUSG00000010607.9	Pigyl	0.349985	2.35344	3.01309	0.0891363	0.573088	32	43	21	47	42	33	33	26	7	21	35	25
	ENSMUSG00000010608.16	Rbm25	-0.0336936	7.42403	0.114624	0.736446	0.979038	1077.59	1593.38	1285.68	1166.49	1494.1	976.03	1397.39	1236.68	233	1196.67	1252	1404.74
	ENSMUSG00000010609.16	Psen2	-0.384387	5.19071	8.28158	0.00612046	0.193951	177	218	165	105	212	130	232	210	48	152	240	239
	ENSMUSG00000010651.5	Acaa1b	-0.247636	0.35001	0.351685	0.555999	0.894797	7.09	5.65	3.35	5.72	5.77	1.18	3.41	5.62	1.07	2.27	8.02	9.31
	ENSMUSG00000010660.4	Plcd1	0.213964	5.12393	3.48282	0.0682451	0.548798	296	348	277	382	299	294	285	309	45	291	242	263
	ENSMUSG00000010663.6	Fads1	-0.281834	4.7952	5.19588	0.0272164	0.395436	125	206	125	146	134	75	174	169	22	160	158	173
	ENSMUSG00000010721.16	Lmbr1	0.18992	4.40229	2.55114	0.116906	0.606343	148	197	193	176	229	166	169	157	34	157	153	165
	ENSMUSG00000010751.16	Tnfrsf22	0.100905	2.43418	0.229419	0.634173	0.931721	23.14	42.49	42.75	32.39	38.38	43	46.74	34.08	4	26	40.43	32.12
	ENSMUSG00000010755.18	Cars	-0.0344405	5.18109	0.113128	0.738105	0.980041	269	328	231.58	228	278	252	270	251	57	243	303	272
	ENSMUSG00000010760.6	Phlda2	0.328675	-0.990454	0.230455	0.63341	0.931721	2	2	3	3	1	2	3	2	0	2	0	2
	ENSMUSG00000010797.7	Wnt2	-0.0679881	1.70244	0.0623105	0.803967	1	16	19	18	9	25	25	22	23	4	17	19	17
	ENSMUSG00000010803.14	Gabra1	-1.22061	-1.34627	1.31853	0.256657	0.662338	0	0	0	1	0	0	1	2	0	0	0	0
	ENSMUSG00000010825.18	Grid2ip	-0.0673699	1.13497	0.0547318	0.81604	1	17.91	10	17.35	26.97	13.22	24.66	24	20	1	17.2	18	25
	ENSMUSG00000010830.9	Kdelr3	0.173847	3.14728	0.862276	0.35784	0.760357	42	90	41	66	62	40	50	43	5	46	52	67
	ENSMUSG00000010911.13	Apip	-0.311436	2.35207	2.26089	0.139357	0.648975	22	34	31	20	30	21	34	26	8	24	42	34
	ENSMUSG00000010914.11	Pdhx	0.271078	4.10093	3.69844	0.0605237	0.518324	123	145	98	118	128	102	106	102	18	73	90	126
	ENSMUSG00000010936.12	Vac14	-0.015486	5.67481	0.0228266	0.880554	1	282	361	296	277	384	280	304	365	62	262	305	341
	ENSMUSG00000011008.14	Mcoln2	0.387455	3.64745	6.10601	0.0171474	0.323514	85	104	117	72	130	98	84	81	21	60	90	58
	ENSMUSG00000011034.7	Slc5a1	0.0536075	4.10805	0.149049	0.701185	0.958328	151	207	181	250	197	181	175	196	26	200	218	181
	ENSMUSG00000011096.18	Akt1s1	0.11942	5.02374	1.14278	0.290517	0.692482	193	286	201	206	237	179	226	197	39	176	211	181
	ENSMUSG00000011114.19	Tbrg1	0.121116	6.29441	1.70676	0.197753	0.662338	474.11	703.76	578.31	491.02	661.3	576.95	572.69	532.01	92.7	485.91	573.27	545.28
	ENSMUSG00000011118.5	Panx3	0.63645	2.41401	8.67775	0.00499441	0.178496	30	63	33	50	40	22	30	22	3	33	20	23
	ENSMUSG00000011148.15	Adssl1	0.46159	5.66315	9.34607	0.00482838	0.175273	475	493	214	449	390	264	363	263	35	272	233	306
	ENSMUSG00000011154.18	Cfap161	0.956154	-1.50687	0.889262	0.378286	0.773462	1	0	0	1	1	0	0	0	0	0	1	0
	ENSMUSG00000011158.9	Brf1	0.110217	5.56338	1.04854	0.311078	0.71546	333.85	370.76	279	293.73	362.64	283.56	309.87	307.69	54.85	255.41	306.83	315.74
	ENSMUSG00000011171.12	Vipr2	0.360922	0.822113	1.10756	0.297986	0.700974	17	12	9	12	7	6	6	8	2	11	6	9
	ENSMUSG00000011179.9	Odc1	0.147549	7.02492	2.02821	0.160997	0.662338	758.67	961.62	739.69	655.01	851.11	779.79	746.78	721.88	158.8	570.13	765.49	689.47
	ENSMUSG00000011254.17	Thg1l	0.105402	3.03057	0.321332	0.573501	0.90523	49	62	49	40	58	41	40	53	6	45	49	49
	ENSMUSG00000011256.17	Adam19	-0.317789	5.49532	9.02758	0.00425209	0.162554	192.41	315	260	202.33	214.24	165.34	297.4	303.55	45.12	216.56	302	302
	ENSMUSG00000011257.20	Pabpc4	0.177197	5.72935	2.32879	0.133691	0.637419	319.44	397.83	294.55	325.15	343.08	258.8	371.35	258.59	35.67	269.25	309.04	283.96
	ENSMUSG00000011263.17	Exoc3l2	0.206875	3.44033	0.992295	0.326136	0.731932	97	65	78	46	61	61	57	56	15	45	73	60
	ENSMUSG00000011267.9	Zfp296	0.365578	2.66679	3.62111	0.0631763	0.529657	60.44	70.47	64	68	48	42	50.61	32.57	13	41.78	40.98	53.84
	ENSMUSG00000011305.12	Plin5	0.0429315	0.262238	0.0102355	0.919845	1	10	6	5	4	6	5	8	7	0	3	11	2
	ENSMUSG00000011306.8	Sugp1	-0.0969624	5.1619	1.03334	0.314571	0.719523	215	305	216	223	264	216	257	252	44	230	280	277
	ENSMUSG00000011350.16	Gm5893	-0.0985411	-1.59368	0.0103347	0.91956	1	0	0	0	0	0	1	1	0	0	0	0	0
	ENSMUSG00000011382.9	Dhdh	0.047221	3.50041	0.0974921	0.756239	0.989712	77	92	76.13	76	81	49.6	93	62.86	13.44	62	75.44	71.77
	ENSMUSG00000011427.17	Zfp790	-0.0181655	4.26864	0.0214319	0.884234	1	126	159	130	113	129	110	133	116	24	123	126	151
	ENSMUSG00000011463.6	Cpb1	-0.108897	-1.56385	0.0115146	0.917965	1	0	0	0	1	0	0	0	0	0	0	0	1
	ENSMUSG00000011486.15	Slc25a41	-0.114864	-1.59375	0.0123108	0.917965	1	0	0	1	0	0	0	0	1	0	0	0	0
	ENSMUSG00000011589.10	Fsd1	0.376575	-0.700552	0.309568	0.58058	0.909283	2	2	5	3	3	0	4	2	0	0	2	2
	ENSMUSG00000011632.8	Pinlyp	0.025309	2.62271	0.0135301	0.908	1	50	76	77	81	71	70	55	70	15	75	71	73
	ENSMUSG00000011658.17	Fuz	0.0162288	3.95335	0.0136916	0.907349	1	96.21	128.01	83.97	87.77	136.57	82.67	122.49	100.49	17.06	90.05	97.22	99.45
	ENSMUSG00000011751.17	Sptbn4	0.55181	0.420181	1.95577	0.16852	0.662338	11	6	12	18	12	17	4	16	1	6	15	4
	ENSMUSG00000011752.8	Pgam1	-0.209365	6.95493	4.49555	0.0392816	0.447658	664.78	1055.73	802.6	716.52	831.03	795.61	996.54	952.03	173.08	754.12	1017.81	1003.99
	ENSMUSG00000011831.17	Evi5	0.17204	5.53968	2.63557	0.111173	0.599682	334.6	428.36	347.78	368.57	436.6	360.17	390.36	339.48	55	316.12	314.71	360.85
	ENSMUSG00000011832.17	Evi5l	0.119749	5.04854	0.969327	0.329881	0.735954	254.87	291.74	207.87	285.82	264.52	201.05	271.13	215.84	41.21	233.34	231.83	211.55
	ENSMUSG00000011837.5	Snapc2	0.193144	3.64697	1.0491	0.312543	0.717023	92	101	60	79	116	94	66	86	9	66	101	92
	ENSMUSG00000011877.14	Git1	0.0358511	6.48395	0.141079	0.708898	0.963254	542	706	619	529	655	523	664	603	97	530	588	577
	ENSMUSG00000011884.14	Gltp	-0.0184499	7.96545	0.0281752	0.867417	1	1967	2863	2776	3159	2533	2234	2915	2794	460	2543	2529	2569
	ENSMUSG00000011958.18	Bnip2	-0.0571858	6.35759	0.277311	0.600942	0.92174	443.89	590.92	442.72	424.44	506.96	443.59	466.97	479.76	92.9	394.92	579.58	565.78
	ENSMUSG00000011960.13	Ccnt1	-0.0265946	6.11289	0.0828226	0.774771	0.996912	485.45	647.27	491.9	458.51	497.79	415.73	539.83	493.72	79.84	455.91	602.44	514.69
	ENSMUSG00000012017.5	Scarf2	0.143397	4.7295	1.04302	0.31234	0.716968	141	173	102	159	164	95	128	136	14	123	130	133
	ENSMUSG00000012042.10	4930579F01Rik	1.13454	-1.62433	1.53569	0.264342	0.662338	0	0	0	0	1	0	0	0	0	0	0	0
	ENSMUSG00000012076.9	Brms1l	-0.158962	4.00919	1.33815	0.253196	0.662338	101.08	144	115	112	94	71	149	92	24	102	119	126
	ENSMUSG00000012114.18	Med15	-0.187988	6.83048	3.84805	0.0557323	0.505041	594.6	926.3	758.75	502.12	745.37	499	905.5	814.1	123	603	773.38	789.97
	ENSMUSG00000012117.14	Dhdds	0.145344	5.31764	2.31553	0.134777	0.639914	248	345	275	249	289	239	284	233	47	226	253	243
	ENSMUSG00000012123.18	Crybg2	0.265988	5.74221	5.44391	0.0239594	0.375298	520	556.97	451	622	532	549.74	501	475	75	413	466	455
	ENSMUSG00000012126.17	Ubxn11	-0.354321	2.37397	2.80456	0.100628	0.599682	33.11	26.12	22.04	20.09	25.17	22.11	30.27	34.15	9.02	24.19	24.19	41.18
	ENSMUSG00000012187.14	Mogat1	1.27973	-1.42968	1.60768	0.218105	0.662338	0	0	0	1	2	1	0	0	0	1	0	0
	ENSMUSG00000012211.14	Tex22	0.24321	-0.755563	0.119573	0.731038	0.976238	3	2	0	2	3	1	1	1	0	1	3	2
	ENSMUSG00000012282.3	Wnt8a	-0.129885	-1.47774	0.0180327	0.893749	1	1	0	1	0	0	0	1	0	0	0	0	1
	ENSMUSG00000012296.17	Tjap1	0.0182525	4.91479	0.0238419	0.877948	1	166	238	194	210	219	137	217	172	32	196	201	178
	ENSMUSG00000012350.16	Ehf	0.0721356	4.3977	0.34221	0.56135	0.898119	209	276	251	244	237	185	262	228	38	223	230	180
	ENSMUSG00000012396.13	Nanog	0	-1.62438	0	1	1	0	0	0	0	0	0	0	0	0	0	0	0
	ENSMUSG00000012405.17	Rpl15	0.054811	7.81142	0.359511	0.551653	0.892863	1413.47	2182.15	1745.68	1856.6	1975.92	1442.61	1871.75	1703.37	292.81	1584.49	1810.1	1655.1
	ENSMUSG00000012422.15	Tmem167	-0.114713	5.9278	0.749239	0.392734	0.785457	309	579	462	378	551	374	497	456	96	436	435	526
	ENSMUSG00000012428.10	Steap4	0.39945	5.9497	13.3241	0.000655528	0.0578307	463	602	508	446	496	433	466	346	71	311	416	332
	ENSMUSG00000012429.10	Mplkip	-0.176324	4.34873	1.80521	0.185525	0.662338	153	193.91	152.92	137	138.9	132	173.69	159	37.05	154	160.82	195
	ENSMUSG00000012443.5	Kif11	-0.237086	5.21958	4.10853	0.0483517	0.490344	221	335	282	208	284	214	310	282	62	263	313	327
	ENSMUSG00000012483.5	Rpa3	0.072998	2.19548	0.0919223	0.763083	0.992974	30	25	25	25	30	33	27	20	2	22	36	36
	ENSMUSG00000012519.15	Mlkl	-0.117312	5.78296	0.44495	0.511421	0.8699	223	320	326	157	350	323	346	265	59	238	360	341
	ENSMUSG00000012535.15	Tnpo3	0.059561	6.67309	0.462472	0.499802	0.862157	714.63	917.66	718.23	709.42	806.1	682.53	787.11	690	135.2	626.47	795.39	764.48
	ENSMUSG00000012609.20	Ttll5	-0.0933176	4.48751	0.673143	0.416093	0.805804	143	191	151	154	162	122	151	177	32	127	187	176
	ENSMUSG00000012640.17	Zfp715	-0.0121281	4.47223	0.00447841	0.947134	1	166	214	155	144	180	108	161	163	23	158	193	152
	ENSMUSG00000012705.17	Retn	0.687204	1.61094	5.1253	0.0288832	0.400985	32	42	24	31	21	19	26	18	2	18	10	17
	ENSMUSG00000012777.15	Acp4	1.90539	-0.776674	4.21358	0.0458955	0.479976	1.03	0	1	1.02	3.02	9.07	0	1	1	0	0	1
	ENSMUSG00000012819.17	Cdh23	-0.0569709	2.79784	0.0808851	0.777349	0.997446	61	58	43	28	31	30	56	46	8	32	40	45
	ENSMUSG00000012848.16	Rps5	0.204929	8.38702	5.44766	0.0239135	0.375117	2486	3331	2487	2751	3101	2340	2723	2488	434	2113	2342	2344
	ENSMUSG00000012889.9	Podnl1	-0.305723	2.66555	1.91406	0.173038	0.662338	28	35	30	18	28	29	41	28	9	33	33	34
	ENSMUSG00000013033.17	Adgrl1	0.155481	5.76846	2.03195	0.160619	0.662338	349.66	433.3	301.02	400.33	332.69	305.63	352.24	334.83	56	288.16	316.4	316.38
	ENSMUSG00000013076.18	Amotl1	0.0222518	7.75718	0.0654509	0.799194	1	1523	1977	1513	1767	1598	1326	1857	1587	296	1464	1571	1523
	ENSMUSG00000013083.9	2200002J24Rik	-0.114867	-1.50583	0.012003	0.917965	1	0	0	1	0	0	0	0	1	0	0	0	0
	ENSMUSG00000013089.16	Etv5	-0.270676	4.92338	6.56457	0.0136627	0.293404	157.34	214.84	170.19	189.11	182.36	126.76	209.15	190.36	42	214.6	193.31	225.21
	ENSMUSG00000013091.6	Tmem190	0.124329	-0.348335	0.0697771	0.836901	1	6	5	3	7	2	4	4	4	0	2	6	6
	ENSMUSG00000013150.16	Gfod2	0.308921	3.43931	4.26598	0.0444126	0.472881	106	84	80	76	87	88	77	77	12	65	74	65
	ENSMUSG00000013155.11	Enkd1	-0.145467	2.47063	0.551458	0.461412	0.845487	30	43	24	25	32	34	26	30	7	26	47	44
	ENSMUSG00000013158.7	4933405L10Rik	0.0686853	-1.17499	0.00633254	0.951781	1	2	1	2	1	0	0	1	2	0	0	0	2
	ENSMUSG00000013160.8	Atp6v0d1	-0.108668	5.9557	0.803247	0.375185	0.773462	375	583	464	403	537	375	515	484	80	423	541	536
	ENSMUSG00000013236.18	Ptprs	0.177072	7.47873	3.31412	0.0750471	0.548931	1369	1756	1169	1436	1362	1046	1170	1249	236	1178	1152	1168
	ENSMUSG00000013275.10	Slc41a1	0.19903	5.54683	3.70937	0.0601585	0.517626	291	379	327	360	323	273	330	269	44	279	299	277
	ENSMUSG00000013338.17	Fer1l4	0.886393	-1.09035	1.16891	0.285133	0.687163	1	0	1	1	3	5	1	1	0	1	0	2
	ENSMUSG00000013353.11	4931406B18Rik	1.76742	-1.53505	2.96465	0.114445	0.599682	0	0	0	1	1	0	0	0	0	0	0	0
	ENSMUSG00000013367.6	Iglon5	0.299887	0.759883	0.734475	0.395778	0.788034	7	10	11	8	15	14	14	2	4	5	7	13
	ENSMUSG00000013415.10	Igf2bp1	0.734072	-0.0207831	2.0119	0.162656	0.662338	9	8	4	0	6	6	2	3	0	4	5	3
	ENSMUSG00000013418.9	B4galnt2	-0.498751	-1.02775	0.472794	0.495078	0.859276	0	1	1	2	1	2	3	1	0	3	0	2
	ENSMUSG00000013419.8	Zfp651	0.295378	4.96526	4.76738	0.0341073	0.423347	224	277	135	200	198	170	177	186	28	168	152	137
	ENSMUSG00000013465.20	Nelfb	0.0807755	5.70654	0.277962	0.602245	0.922609	320	388	290	302	325	332	313	293	60	263	314	368
	ENSMUSG00000013483.15	Card14	0.555881	5.67108	20.0915	5.29705e-05	0.0134038	534.96	457.58	397.79	402.61	486.89	431.94	416.25	270.99	58.66	244.95	385.58	246.52
	ENSMUSG00000013495.16	Tmem175	-0.236856	3.97014	2.71816	0.105871	0.599682	83.78	154.48	122.85	82.94	118.77	74.57	154.16	125.86	21.82	87.99	127.7	130.99
	ENSMUSG00000013523.14	Bcas1	0.626585	0.912846	4.04897	0.0499397	0.4964	8	14	12	11	11	9	10	5	2	4	8	7
	ENSMUSG00000013539.15	Tango2	-0.0773745	4.31687	0.3847	0.538089	0.885794	108	179	131	89	151	95	127	121	18	134	135	155
	ENSMUSG00000013562.13	4833413E03Rik	-0.251334	-1.13493	0.0854092	0.771381	0.99691	0	2	1	1	2	0	1	2	1	0	1	1
	ENSMUSG00000013584.6	Aldh1a2	0.0489535	4.35948	0.0605128	0.807658	1	120	163	130	74	136	94	134	110	19	120	151	64
	ENSMUSG00000013593.13	Ndufs2	0.329762	6.17307	9.93226	0.00282336	0.128238	520	614	446	564	501	475	476	416	65	362	430	452
	ENSMUSG00000013611.15	Snx31	-1.91922	-1.50608	3.18557	0.0815019	0.553138	0	0	0	0	0	0	0	2	0	0	0	0
	ENSMUSG00000013622.16	Atraid	0.328611	4.47113	8.57397	0.00524011	0.182406	142	182	160	196	190.8	141	146.94	141	22	129	130.8	134
	ENSMUSG00000013629.17	Cad	0.233961	6.2467	4.60849	0.0369968	0.435608	441	581	473	460	529	639	429	462	79	381	520	474
	ENSMUSG00000013643.14	Lypd8	-1.2754	-1.39425	1.56737	0.216774	0.662338	0	0	0	0	0	2	0	0	1	3	0	1
	ENSMUSG00000013646.18	Sh3bp5l	0.215894	5.2906	3.19051	0.080508	0.550854	313	345	232	336	312	345	325	245	52	245	258	296
	ENSMUSG00000013653.3	1810065E05Rik	1.77545	-1.4782	2.70302	0.114445	0.599682	0	0	0	0	1	1	0	0	0	0	0	0
	ENSMUSG00000013662.7	Atad1	0.00707893	6.15701	0.00447641	0.94694	1	459	585	501	437	557	427	552	445	78	461	542	522
	ENSMUSG00000013663.8	Pten	-0.050167	7.92649	0.298757	0.587244	0.91312	1575.08	2328.67	1860.84	1680.68	2025.18	1427.11	2007.94	1866	361.35	1733.31	1755.96	1948.27
	ENSMUSG00000013698.13	Pea15a	-0.222333	6.2639	6.00043	0.0180773	0.332316	434	612	435	450	482	330	526	489	107	435	597	583
	ENSMUSG00000013701.14	Timm23	0.241133	5.89586	6.12704	0.0169684	0.322325	429.16	511.55	383.34	435.66	547.41	457.62	436.09	429.43	62.93	350.95	404.58	379.35
	ENSMUSG00000013707.4	Tnfaip8l2	-0.29859	4.03837	3.9691	0.0521594	0.49841	71	124	102	42	93	62	119	85	23	76	102	111
	ENSMUSG00000013736.17	Trnt1	0.0761229	4.97608	0.426023	0.517121	0.874031	235.78	250.69	203.48	218.76	273.08	211.85	216.06	226.17	26.29	225.79	232.44	252.75
	ENSMUSG00000013766.12	Ly6g6e	-0.026473	2.86402	0.0245923	0.876058	1	66	81.33	79.51	86	89	62	77	82.61	12	77.76	76	88
	ENSMUSG00000013787.16	Ehmt2	-0.0358907	6.91516	0.122205	0.728214	0.974404	736	899	727	654	812	654	803	775	143	640	822	811
	ENSMUSG00000013822.8	Elof1	-0.00788016	4.65872	0.00451273	0.946725	1	157	173	157	170	170	174	176	157	33	135	189	191
	ENSMUSG00000013833.16	Med16	-0.046228	4.97523	0.186927	0.66746	0.940031	194	230.75	201	221	213	161	252	188	37	182.73	223	219
	ENSMUSG00000013846.11	St3gal1	0.0966446	7.20334	1.09969	0.299688	0.702772	703	1158	963	760	967	685	884	771	149	725	876	818
	ENSMUSG00000013858.15	Tmem259	0.0660851	6.37923	0.374743	0.543376	0.887415	565.89	696.77	497.17	638.48	573.64	520.44	590.77	512.93	116	529.97	574.96	538.97
	ENSMUSG00000013878.19	Rnf170	0.00269321	4.71736	0.000578974	0.980905	1	180.51	245.52	197.58	232.4	219.46	137.43	231.81	181.87	36.95	190.2	176.35	228.84
	ENSMUSG00000013921.16	Clip3	0.177068	3.35093	0.976008	0.328237	0.734207	50	81	67	66	79	46	53	50	5	49	68	78
	ENSMUSG00000013928.14	1700020L13Rik	0.518587	-0.239665	0.902239	0.347033	0.751343	3	3.3	5.71	5.23	2.09	3	3.2	2.4	0	0	4	4
	ENSMUSG00000013936.13	Myl2	0.562995	4.07626	2.93066	0.102963	0.599682	157	186	76	172	173	134	143	110	11	138	61	70
	ENSMUSG00000013973.13	Dedd	0.136955	4.79196	1.45154	0.234302	0.662338	176.46	262.44	198.59	162.95	201.85	156.06	197.42	153.28	32.8	132.74	189.62	205.69
	ENSMUSG00000013974.4	Mcemp1	-0.267383	1.73149	0.640275	0.429245	0.818563	9	27	20	13	22	11	17	14	2	11	41	22
	ENSMUSG00000013997.11	Nit1	-0.172023	4.51062	1.792	0.187111	0.662338	154.54	239.56	155.41	170.05	157.15	117.94	184.58	182.72	43.2	181.26	171.38	179.31
	ENSMUSG00000014030.16	Pax5	-0.0479275	2.65449	0.0436332	0.835439	1	45.97	26.31	26	29	29.58	33	43	25	9	33	34	26
	ENSMUSG00000014039.19	Prdm15	0.0244929	4.50206	0.0414938	0.839466	1	173	237	185	139	153	139	163	166	24	159	210	162
	ENSMUSG00000014074.18	Rnf168	0.0707526	5.31803	0.44223	0.509293	0.868795	285	360	244	236	281	273	298	258	54	214	298	260
	ENSMUSG00000014075.16	Dynlt2b	-0.529254	2.26568	6.73421	0.0125723	0.283567	24	29	34	14	25	18	41	27	5	30	39	40
	ENSMUSG00000014077.14	Chp1	0.0289121	6.82523	0.0946607	0.759691	0.991312	719.79	1100.79	918	895.01	868	693.84	952.87	803.63	159	799.9	824.6	856.95
	ENSMUSG00000014158.13	Trpv4	0.0233536	3.98509	0.0306099	0.861864	1	125	140	105	138	181	89	129	127	15	123	122	159
	ENSMUSG00000014164.16	Klhl3	-0.266941	1.79939	1.15003	0.289009	0.691115	13	21	11	17	24	11	21	17	1	22	17	24
	ENSMUSG00000014177.11	Tvp23b	0.135964	3.72671	0.739147	0.394291	0.786761	77	103	85	85	100	112	84	85	13	79	95	95
	ENSMUSG00000014195.17	Dnajc7	-0.0418503	6.55276	0.20131	0.655724	0.934873	573.87	696.06	519.91	547.76	660.78	548.97	640.48	570.08	112	502.07	640.89	723.4
	ENSMUSG00000014198.16	Zfp385c	0.524619	1.33569	3.58418	0.064488	0.534067	15	23	17	21	14	15	12	11	2	13	15	10
	ENSMUSG00000014226.11	Cacybp	-0.0673984	5.00346	0.331948	0.567259	0.902275	188.93	259.49	214.51	163.91	241.69	228.86	248.03	219.56	35	191	241.02	266.34
	ENSMUSG00000014232.15	Cluap1	0.166603	3.47129	1.10817	0.297855	0.700904	97.31	77.88	84.35	57.64	96.33	55.59	67.84	64.46	20.12	59.46	67.4	74.36
	ENSMUSG00000014243.6	Zswim7	-0.0775104	1.57984	0.0826845	0.774954	0.996914	12	18	15	22	17	18	12	21	2	23	20	16
	ENSMUSG00000014245.9	Pigl	-0.0775438	2.19149	0.138739	0.711209	0.964499	33	33	20	24	38	27	24	29	6	35	29	36
	ENSMUSG00000014294.5	Ndufa2	0.465754	4.82351	3.4624	0.077756	0.548931	184	188	97	178	215	219	148	137	22	95	135	156
	ENSMUSG00000014301.14	Pam16	0.291534	3.28588	3.05917	0.0868004	0.567777	70.23	79.83	62.14	46.47	72.93	57.51	53.83	46.11	9.14	45.5	61.17	60.57
	ENSMUSG00000014303.14	Glis2	0.225517	4.7907	3.19938	0.0801016	0.550205	166.41	234.39	148	181	156	134	155	149	25	118	154.68	155.96
	ENSMUSG00000014313.16	Cox6c	-0.0150678	4.97864	0.0133304	0.908574	1	176.08	309.13	200.32	242.22	258.57	180.39	239.3	238.3	46.75	210.61	175.12	266.32
	ENSMUSG00000014329.15	Bicc1	0.18039	6.15475	2.49254	0.121084	0.614876	426.64	630.74	403.88	475.93	490.85	290.73	450.89	377.59	68	350.79	416	410.94
	ENSMUSG00000014349.8	Ube2z	-0.0405673	6.42099	0.202011	0.655165	0.934689	491	706	534	492	645	516	597	587	123	460	607	599
	ENSMUSG00000014353.16	Tmem87b	0.0520875	5.61249	0.234912	0.630153	0.931721	323	474	396	312	401	269	388	319	62	312	334	400
	ENSMUSG00000014355.11	Anapc1	-0.0731124	7.11755	0.745156	0.392391	0.785348	777	1174	950	913	1014	793	1137	912	176	877	1019	1027
	ENSMUSG00000014361.6	Mertk	-0.289688	4.58364	4.22387	0.0454305	0.477307	103	158	111	107	127	79	138	121	20	117	138	197
	ENSMUSG00000014402.16	Tsg101	-0.0210915	5.20014	0.0405655	0.841247	1	245.61	325.69	274.93	274.7	325.47	261.12	313.68	288.08	60.91	267.54	301.84	253.83
	ENSMUSG00000014418.17	Hps5	-0.107211	5.41663	1.07495	0.305127	0.708542	234	333	277	219	302	253	292	276	59	239	328	307
	ENSMUSG00000014426.10	Map3k4	0.0951165	5.97016	1.15218	0.288564	0.690622	449	615	462	496	510	357	508	453	85	400	412	473
	ENSMUSG00000014444.18	Piezo1	-0.197277	7.54186	4.8652	0.0323212	0.41449	1025.8	1430.98	1137.46	1022.88	1110.49	888.86	1350.78	1231.05	239.41	1017.74	1310.88	1413.3
	ENSMUSG00000014453.5	Blk	-0.201285	0.452331	0.269162	0.606325	0.925709	7	5	7	6	8	6	7	6	1	13	6	6
	ENSMUSG00000014470.5	Rnf166	0.135226	4.32197	0.945655	0.335798	0.741323	122	158	124	140	143	102	134	107	19	112	122	133
	ENSMUSG00000014496.9	Ankrd28	0.112453	6.772	1.26291	0.266799	0.665166	680	1058	752	689	847	752	816	712	123	698	708	809
	ENSMUSG00000014498.10	Ankrd52	0.0239794	7.19804	0.0801072	0.778393	0.997818	824.93	1167.29	869.62	775.24	970.47	786.67	913.42	867.45	152	785.64	914.08	999.05
	ENSMUSG00000014503.16	Pkd2l2	-0.312891	1.71311	1.66731	0.202923	0.662338	13.97	23.47	19.33	15.2	27.25	14.96	27.68	18.59	4.08	22.44	28.57	21.15
	ENSMUSG00000014504.17	Srp19	-0.0534249	4.1022	0.160917	0.690128	0.952264	103	155	112	131	115	122	143	115	29	98	138	136
	ENSMUSG00000014529.10	Tmbim7	-2.08081	-1.42362	4.4752	0.040211	0.451805	0	0	0	0	0	1	1	2	0	3	0	0
	ENSMUSG00000014542.4	Clec4f	-1.25287	-1.56336	1.87855	0.215017	0.662338	0	0	0	0	0	0	0	0	0	0	0	1
	ENSMUSG00000014543.15	Klra17	-0.658141	-0.768598	0.825929	0.368082	0.769278	2	2	0	0	4	0	3	2	1	1	2	2
	ENSMUSG00000014547.11	Wdfy2	-0.227839	6.63525	6.20079	0.0163561	0.317297	537	853	685	608	750	492.98	799.58	775	140	632	780	841
	ENSMUSG00000014550.15	Rbsn	0.0252411	5.76995	0.0733542	0.787698	1	388	430	384	407	365	325	400	359	71	343	396	400
	ENSMUSG00000014551.9	Mrps25	0.184118	4.87214	2.63914	0.110937	0.599682	217.75	251.52	222.16	235.33	211.67	216.81	184.99	169.39	38.55	196.77	242.03	206.04
	ENSMUSG00000014554.14	Dguok	0.0207356	3.94953	0.0202805	0.887364	1	129	156	120	120	136	82	149	117	25	106	117	114
	ENSMUSG00000014592.22	Camta1	0.0505533	5.54331	0.255935	0.615287	0.930238	331	514	408	371	431	388	429	428	73	382	369	358
	ENSMUSG00000014599.11	Csf1	0.0584213	7.63432	0.296284	0.588791	0.914212	1023	1341	1343	736	1267	1128	1236	1048	222	858	1207	1103
	ENSMUSG00000014601.14	Strip1	-0.0478373	5.41475	0.226015	0.636693	0.931721	264	370	316	305	384	253	349	284	61	318	340	335
	ENSMUSG00000014602.16	Kif1a	0.41454	3.37866	6.21001	0.0162813	0.317297	63	76	59	42	71	56	50	52	5	34	57	44
	ENSMUSG00000014603.4	Alx3	-0.588284	-0.814583	0.548908	0.462444	0.84626	0	0	2	0	2	2	1	2	1	2	1	1
	ENSMUSG00000014606.15	Slc25a11	0.0985416	5.78504	1.02905	0.315567	0.720575	387.16	504.05	327	414.12	497.1	368	390	377	67	353.15	406	440.06
	ENSMUSG00000014609.17	Chrne	0.503075	1.82874	1.90499	0.179149	0.662338	21	33	18	40	35	10	23	22	3	14	17	16
	ENSMUSG00000014633.16	Cmc2	0.0366256	2.21281	0.0318186	0.859192	1	34	30	20	34	37	31	30	31	7	25	31	33
	ENSMUSG00000014668.16	Chfr	-0.0941117	5.40864	0.915071	0.343659	0.749122	294	353.04	285.18	231	302.91	265	318.91	301.92	57	289	333	304
	ENSMUSG00000014686.9	Ceacam16	-0.685603	0.869357	3.88983	0.0544697	0.502207	8	5	10.21	2	9	5	13.78	5.14	3	10	9.93	12.89
	ENSMUSG00000014704.11	Hoxa2	0.0906839	0.49938	0.0695029	0.793212	1	11	15	7	13	8.78	3	13.25	11	2	9.17	4	6.71
	ENSMUSG00000014725.17	Adam28	0	-1.593	0	1	1	0	0	0	0	0	0	0	0	0	0	0	0
	ENSMUSG00000014747.7	Ankrd53	-0.530146	-0.224735	1.07343	0.305464	0.709041	1	4	3.45	4	1	5	2	4	2	4	4	7
	ENSMUSG00000014748.14	Tex261	0.0261138	6.1252	0.0881918	0.767795	0.995422	422	593	445	413	482	378	456	397	91	411	471	470
	ENSMUSG00000014763.9	Fam120b	-0.0483027	5.60086	0.250988	0.618715	0.931721	331	468	374	345	362	296	386	380	63	338	402	394
	ENSMUSG00000014767.18	Tbp	-0.158932	4.97213	1.40246	0.242731	0.662338	217.27	289.35	237.77	232.37	227.24	158.15	279.52	256.31	43.24	214.63	250.69	279.18
	ENSMUSG00000014769.11	Psmb1	0.0281159	6.28718	0.0911294	0.764076	0.993482	466	690	499	509	648	491	580	549	82	450	616	583
	ENSMUSG00000014771.14	Pdcd2	0.08447	2.87733	0.284348	0.596374	0.918255	43.73	68.65	47.23	44.63	53.76	52.85	58.48	47.69	7.76	34.37	51.31	56.82
	ENSMUSG00000014773.14	Dll1	0.103912	4.54158	0.545669	0.463854	0.847243	167	237	181	163	230	148	192	180	22	150	180	200
	ENSMUSG00000014776.8	Nol3	0.471775	3.54885	8.42019	0.00562797	0.186703	101.39	86.11	49.78	101.16	93.13	67.46	61.43	65.52	10	48.77	59	70.23
	ENSMUSG00000014778.11	Fhod1	0.0627419	5.28497	0.210986	0.648499	0.932216	241	267	201	167	222	214	233	228	34	155	211	247
	ENSMUSG00000014782.17	Plekhg4	-0.220568	1.91106	0.708719	0.404126	0.795147	10	36	27	10	19	14	32	28	4	11	22	19
	ENSMUSG00000014786.9	Slc9a5	0.224606	2.00833	0.691386	0.409891	0.800283	15	36	13	20	21	28	22	24	1	13	16	24
	ENSMUSG00000014791.11	Elmo3	0.212389	3.68587	2.19669	0.144971	0.659627	95	121	113	110	124	116	114	95	20	92	101	86
	ENSMUSG00000014813.10	Stc1	-0.331035	2.73021	2.63825	0.110996	0.599682	29	45	45	23	30	20	38	40	4	30	54	46
	ENSMUSG00000014837.16	4931428F04Rik	0.290023	1.69161	1.28973	0.261846	0.662338	18.61	24.89	32.22	16.84	23.87	18.54	25.57	16.48	1	22.23	15	16.77
	ENSMUSG00000014846.13	Tppp3	0.103553	6.65902	0.928765	0.340109	0.746102	610	790	586	597	713	511	607	615	92	499	636	672
	ENSMUSG00000014850.16	Msh3	-0.0593937	4.96532	0.29942	0.586831	0.912919	194.59	265.88	238.4	185.3	238.6	176	241.29	231.54	46	211	208	221.39
	ENSMUSG00000014852.17	Adamts13	-0.125321	-1.39637	0.0170057	0.896801	1	0	0	1	0	0	1	1	0	0	0	1	0
	ENSMUSG00000014856.13	Tmem208	-0.0661075	3.36486	0.154714	0.695846	0.955428	70	98	64	56	67	84	72	69	17	67	81	90
	ENSMUSG00000014859.10	E2f4	-0.0692014	5.15205	0.344573	0.560006	0.897315	218	274	232	199	216	219	237	240	34	218	283	251
	ENSMUSG00000014867.10	Surf4	-0.0488118	7.65056	0.219076	0.641905	0.931721	992	1474	1128	932.86	1180.71	1013	1257	1171	208	931.89	1207.82	1281.81
	ENSMUSG00000014873.16	Surf2	0.146597	3.9435	1.32468	0.255565	0.662338	110	153	105	89.14	113.29	85.4	96	92	20	86.11	109.18	104.19
	ENSMUSG00000014905.5	Dnajb9	-0.0724804	4.47609	0.254717	0.61621	0.930772	159.98	197	177	163	161.95	105	165	161	30	154	172.98	194.98
	ENSMUSG00000014907.11	Naf1	0.153817	4.06994	1.44618	0.235155	0.662338	97	150	120	126	133	124	129.94	116.89	16	107	119.87	103
	ENSMUSG00000014932.16	Yes1	0.00564813	4.99833	0.00248458	0.960456	1	242.98	296.27	247.65	242.31	278.29	209.63	297.18	202.57	46.96	245.5	256.79	261.72
	ENSMUSG00000014956.16	Ppp1cb	0.0725498	7.83079	0.620704	0.434735	0.822695	1556.37	2071.95	1616.01	1669.95	1925.66	1637.17	1791.61	1544.44	317.51	1556.33	1647.62	1773.47
	ENSMUSG00000014959.13	Gorasp2	-0.0678567	6.09912	0.427794	0.516256	0.87386	362.91	594.05	467.01	471.12	495.73	372.6	520.16	484.02	90	420.88	505.03	478.88
	ENSMUSG00000014980.15	Tsen15	0.251581	3.3041	2.84499	0.098276	0.599682	89	83.77	87.88	82.81	85	56.73	68.8	73.89	10	62	74.83	67.8
	ENSMUSG00000015001.18	Oc90	0.84439	-0.854006	1.04165	0.312653	0.717136	3	1	0	1	4	2	0	1	0	2	1	1
	ENSMUSG00000015002.19	Efr3a	-0.0260219	6.52159	0.0666327	0.797429	1	555	838	672	590	746	563	689	632	140	589	695	695
	ENSMUSG00000015013.10	Trappc2l	-0.042462	3.42656	0.0713014	0.790618	1	65	111	55	53	76	66	57	67	11	65	78	102
	ENSMUSG00000015016.9	Acsf3	0.0436866	3.73911	0.084316	0.772807	0.99691	75	105	82	76	113	74	87	72	18	56	101	105
	ENSMUSG00000015023.8	Ddx19a	0.0412616	5.35172	0.16327	0.687994	0.951353	298.2	306.11	253.16	268.08	294.9	285.8	274.97	277.58	56.33	277.22	278.29	270.99
	ENSMUSG00000015027.12	Galns	-0.377098	3.99342	5.38031	0.0247947	0.381133	56	124	103	54	78	64	102	92	27	76	98	128
	ENSMUSG00000015053.15	Gata2	0.0425085	3.6355	0.078833	0.780115	0.998593	71	97	58	43	84	52	81	59	9	63	60	69
	ENSMUSG00000015083.12	C8g	-0.519771	-1.17544	0.336088	0.564861	0.900861	1	1	0	2	0	1	1	2	2	1	0	0
	ENSMUSG00000015085.9	Entpd2	0.499432	3.94705	13.6081	0.000582872	0.0537405	105	151	96	105	149	107	83	93	14	88	76	81
	ENSMUSG00000015087.15	Rabl6	0.0143653	6.00578	0.0253168	0.874261	1	457	542	386	459	491	391	531	442	87	376	450	454
	ENSMUSG00000015090.14	Ptgds	0.165736	-0.686547	0.0759087	0.784126	1	0	5	3	2	6	2	1	1	2	2	2	5
	ENSMUSG00000015092.10	Edf1	0.0587796	5.45193	0.209772	0.649223	0.932216	269	256.02	217.05	243	325.25	265	246	272	49	198	278.33	278
	ENSMUSG00000015093.16	Clic3	0.126001	4.06793	0.853014	0.360411	0.762875	157	233	187	258	211	144	223	202	28	180	159	161
	ENSMUSG00000015094.17	Npdc1	0.359934	4.81206	4.10072	0.0530831	0.49841	240	214	173	161	204	185	143	127	25	142	187	184
	ENSMUSG00000015095.13	Fbxw5	0.00481626	5.19552	0.0023871	0.961239	1	226	298	237	224	280	212	281	255	48	225	231	228
	ENSMUSG00000015112.16	Slc25a13	-0.0984465	3.81115	0.536283	0.467608	0.849417	71	120	107	92	132	95	113	117	20	94	98	130
	ENSMUSG00000015120.16	Ube2i	0.07938	7.20114	0.674359	0.415675	0.805355	898.72	1110.86	901.21	877.05	1137.29	912.87	976.16	883.47	186.94	792.84	946.36	974.37
	ENSMUSG00000015126.10	Tsr3	0.132293	3.10462	0.566162	0.455534	0.841095	55	69	39.87	44	62.48	54	40.82	61.57	10	47	51.77	43
	ENSMUSG00000015127.15	Unkl	0.178465	4.9136	2.66915	0.108981	0.599682	209.94	314.18	215.44	226.25	253	186.46	197.79	174.03	43	195.38	227.27	221.53
	ENSMUSG00000015133.18	Lrrk1	-0.129212	6.9502	2.08622	0.155257	0.662338	659	1011	812	652	835	652	847	858	148	753	857	925
	ENSMUSG00000015134.16	Aldh1a3	0.167702	3.65952	0.968704	0.330035	0.736174	127	79	74	103	73	56	85	59	16	92	66	77
	ENSMUSG00000015143.16	Actn1	-0.14315	6.66971	2.77471	0.102405	0.599682	517.91	713.3	534.44	458.39	670.9	501.03	646.81	591.63	123.84	511.55	675.65	675
	ENSMUSG00000015149.15	Sirt2	-0.137118	5.67398	2.10457	0.15349	0.662338	312	461	313	301	345	246	383	343	64	321	387	381
	ENSMUSG00000015165.17	Hnrnpl	-0.0588469	7.90452	0.489254	0.487702	0.854532	1578	2069	1489	1523	1737	1310	1691.01	1702	324	1455	1746	1785
	ENSMUSG00000015176.12	Nolc1	0.126161	5.46632	1.51296	0.224799	0.662338	278	316	250	274	310	315	269	298	46	232	306	255
	ENSMUSG00000015189.13	Casd1	0.0228929	4.15688	0.0332627	0.856067	1	112	165	110	117	142	124	160	112	21	109	131	129
	ENSMUSG00000015202.14	Cnksr3	0.11512	4.00331	0.729249	0.397451	0.789236	126	132	112	129	136	88	130	120	14	107	112	106
	ENSMUSG00000015214.15	Mtmr1	0.0845951	5.69146	0.707459	0.404541	0.79543	400	579	470	434	446	340	459	411	68	397	435	428
	ENSMUSG00000015217.12	Hmgb3	-0.0936521	3.39147	0.422894	0.518657	0.874497	75.81	99.89	65.44	51.92	68.36	62.44	73.2	75.98	16.25	74.49	65.82	80.54
	ENSMUSG00000015222.19	Map2	-0.0714498	6.32979	0.473655	0.494688	0.858995	660	1109	902	1056	888	745	1089	906	164	989	794	956
	ENSMUSG00000015224.11	Cyp2j9	-0.322078	2.61489	2.58612	0.114491	0.599734	37	90	57	32	47	33	67	67	9	76	41	55
	ENSMUSG00000015243.5	Abca1	-0.0927956	7.6544	1.12312	0.294656	0.697163	1313	1763	1238	1111	1406	879	1479	1396	251	1188	1235	1523
	ENSMUSG00000015247.11	Nipsnap3b	-0.321075	3.73356	4.25378	0.044705	0.474377	63	106	83	47	84	50	99	81	16	67	97	106
	ENSMUSG00000015289.5	Lage3	0.0326678	3.49035	0.0524895	0.976372	1	63	91	65	66	76	83	74	69	9	73	73	85
	ENSMUSG00000015290.16	Ubl4a	0.00855655	4.78335	0.00499633	0.943948	1	188.02	256	216	191	227	168.7	207	196	33	188	243	216
	ENSMUSG00000015291.11	Gdi1	0.0538532	6.35191	0.284704	0.596145	0.918065	579	655	470	486	558	498	484	487	90	475	612	594
	ENSMUSG00000015305.7	Sash1	0.0789724	7.60307	0.833941	0.365789	0.767556	1190.42	1577.09	1248.04	1133.66	1499.54	1084.67	1354.84	1214.18	219.79	1068.7	1246.75	1260.78
	ENSMUSG00000015312.10	Gadd45b	0.197448	4.56979	2.10762	0.153199	0.662338	155	197	210	147	151	184	164	140	33	111	162	182
	ENSMUSG00000015314.11	Slamf6	-1.0867	3.10254	32.2261	8.234e-07	0.00109788	28	56	38	19	44	25	78	65	20	45	87	80
	ENSMUSG00000015316.12	Slamf1	0.0568101	1.89358	0.0479306	0.827651	1	11	27	40	11	22	16	20	24	3	13	27	19
	ENSMUSG00000015335.17	Zdhhc12	-0.311192	2.65179	2.2966	0.136343	0.64299	29	36	25	22	43	37	32	41	10	35	41	45
	ENSMUSG00000015337.6	Endog	0.513988	1.92955	2.9768	0.0930598	0.585053	33.02	24.11	8.19	39.06	43.04	26.13	17.67	19.21	1.52	25.15	22.26	20.94
	ENSMUSG00000015340.11	Cybb	-0.529662	7.42414	7.45048	0.012925	0.287963	686	1314	1184	502	1024	617	1392	1143	236	925	1375	1522
	ENSMUSG00000015341.18	Golga7	-0.0265225	5.94849	0.0855986	0.771135	0.99691	390	521.61	481.53	426.23	510.73	366.91	486.9	420.41	83.67	395.97	492.8	508.71
	ENSMUSG00000015342.7	Xk	-0.0749857	1.87754	0.0733744	0.78767	1	20	29	16	14	21	21	28	24	1	12	29	19
	ENSMUSG00000015354.9	Pcolce2	0.637831	4.99618	27.7297	3.39186e-06	0.0023056	238	278	168	267	214	190	169	133	26	145	138	146
	ENSMUSG00000015355.14	Cd48	-0.8085	4.40203	8.95703	0.0073165	0.214157	86	197	130	74	138	79	200	209	41	118	244	235
	ENSMUSG00000015357.11	Clpx	0.345611	5.45301	10.0145	0.00272147	0.126879	335	355	305	327	401	362	307	266	50	238	310	270
	ENSMUSG00000015363.14	Trabd	0.188797	5.66492	2.29076	0.13747	0.645582	359	403	359	337	406	357	377	293	59	276	328	377
	ENSMUSG00000015365.16	Mov10l1	-1.25365	-1.62422	1.90522	0.215017	0.662338	0	0	0	0	0	0	0	0	0	0	1	0
	ENSMUSG00000015377.11	Dennd6b	0.224197	3.7234	2.30929	0.135291	0.640661	75	79	63	62	95	69	72	47	8	52	65	91
	ENSMUSG00000015396.5	Cd83	0.160178	3.28364	0.781886	0.381059	0.775472	65	86	85	59	64	37	59	63	10	61	44	68
	ENSMUSG00000015401.13	Cltrn	2.54986	-1.50643	5.39686	0.0256125	0.384488	2	0	0	1	1	0	0	0	0	0	0	0
	ENSMUSG00000015405.16	Ace2	0.0199693	4.51953	0.018612	0.892197	1	247	283	262	323	245	188	290	252	44	261	249	237
	ENSMUSG00000015437.6	Gzmb	-0.48449	7.044	2.75889	0.112946	0.599682	381	1089	740	207	710	478	955	712	188	552	921	837
	ENSMUSG00000015441.5	Gzmf	0.507849	-1.47925	0.24356	0.646778	0.931721	1	1	0	0	0	0	0	0	0	0	0	1
	ENSMUSG00000015451.17	C4a	-0.0352483	0.869703	0.0104175	0.919138	1	8.65	9.62	12.4	11.99	9.4	12.98	17.99	10.77	2.16	7.76	7.71	12.19
	ENSMUSG00000015452.15	Ager	-0.0461055	1.10979	0.0196036	0.889247	1	17	11	12	17	9	3	15	12	4	8	10	12
	ENSMUSG00000015461.16	Atf6b	-0.106355	5.45599	0.932707	0.339096	0.745099	210	331	305	257	276	279	309	279	58	260	322	321
	ENSMUSG00000015467.15	Egfl8	-0.250997	1.87082	0.563636	0.457933	0.842406	19.6	15.28	18	18	10	10	23	23	3	8	22	16.18
	ENSMUSG00000015468.15	Notch4	-0.0411124	4.12567	0.0354158	0.852243	1	96	91	55	54	87	78	94	81	9	72	85	79
	ENSMUSG00000015474.17	Ppt2	-0.334892	4.23111	5.24099	0.0265903	0.39043	93.1	164.71	126	123	115	70	144	129	31	116	162	160.23
	ENSMUSG00000015476.7	Prrt1	-0.0294441	1.23214	0.0112887	0.915837	1	12	10	16	11	12	8	11	12	1	10	12	16
	ENSMUSG00000015478.14	Rnf5	-0.0284125	3.3775	0.033485	0.855592	1	77.51	100	69.57	57.15	85.83	56.97	59.54	76.6	18.16	70.01	73.8	87.68
	ENSMUSG00000015484.4	Fam163a	-0.128451	-1.42294	0.0119013	0.917965	1	0	1	0	0	0	0	0	0	0	0	1	0
	ENSMUSG00000015488.15	Cacfd1	0.253737	5.01739	1.80256	0.192162	0.662338	178	219	176	171	227	177	172	131	27	138	205	170
	ENSMUSG00000015501.11	Hivep2	0.148551	7.45122	1.84241	0.18114	0.662338	1110	1529	1192	1334	1499	903	1331	1203	176.66	1012	1157	1131
	ENSMUSG00000015522.19	Arnt	-0.00311143	6.52393	0.00136589	0.970675	1	552	776	634	560	682	540	680	563	129	541	664	637
	ENSMUSG00000015533.10	Itga2	-0.233815	4.48609	3.34586	0.0737118	0.548931	111	241	160	121	148	119	179	168	35	151	199	168
	ENSMUSG00000015536.15	Mocs2	0.0130172	5.58253	0.011663	0.914459	1	291	371	289	292	385	282	336	326	59	275	313	331
	ENSMUSG00000015542.18	Nat9	-0.0832696	3.45383	0.177295	0.675998	0.945219	70	57	47	43	75	54	61	63	13	37	70	75
	ENSMUSG00000015568.17	Lpl	-0.160877	6.73073	1.75709	0.192843	0.662338	636	885	610	684	642	372	809	599	119	574	705	925
	ENSMUSG00000015575.16	Atp6v0e	-0.145877	5.48482	1.51925	0.223853	0.662338	281	419	308	322	407	227	364	321	71	335	391	372
	ENSMUSG00000015597.18	Zfp318	0.0844408	5.71776	0.650493	0.423992	0.813513	358	447	370	412	387	241	360	334	67	367	330	332
	ENSMUSG00000015599.10	Ttbk1	0.732918	-0.056403	1.95898	0.168178	0.662338	5	1	2	4	5	6	2	2	0	2	3	3
	ENSMUSG00000015605.7	Srf	-0.0138899	5.27903	0.0111782	0.916295	1	203	280	221	210	263	283	280	278	39	192	250	268
	ENSMUSG00000015619.11	Gata3	-0.05847	6.25056	0.313385	0.578265	0.907871	515	962	768	809	760	471	835	695	124	752	687	768
	ENSMUSG00000015627.6	Gata5	-1.25092	-1.59414	1.95019	0.215017	0.662338	0	0	0	0	0	0	1	0	0	0	0	0
	ENSMUSG00000015647.10	Lama5	0.147189	7.05579	2.10032	0.153898	0.662338	894	1213	1015	1139	1115	827	1034	947	181	866	860	939
	ENSMUSG00000015652.10	Steap1	-0.166763	2.18848	0.43621	0.512176	0.870672	19	36	13	12	26	34	33	23	3	21	32	26
	ENSMUSG00000015653.14	Steap2	-0.152603	4.71037	1.62681	0.208403	0.662338	111	216	197	135	160	126	187	154	36	153	190	178
	ENSMUSG00000015656.18	Hspa8	-0.0609545	10.2422	0.316445	0.576421	0.90699	7181.97	9347.93	8353.23	6202.02	8002.87	7647.39	8673.03	7470.16	1610.77	6145.27	10493.5	7930.44
	ENSMUSG00000015659.13	Serac1	-0.0545131	3.20328	0.1274	0.722739	0.970567	60	94.42	58.76	69	68.68	43.58	79.86	70.69	11	65.57	60	66.07
	ENSMUSG00000015665.9	Awat1	0.330263	4.07719	4.14982	0.0483325	0.490344	175	138	143	178	151	108	128	126	21	119	131	96
	ENSMUSG00000015668.14	Pdzd11	0.0248868	4.02635	0.0305302	0.862042	1	106.45	120.72	113.59	105.17	121.21	107.13	124.9	103.59	26.05	82.77	100.51	133.38
	ENSMUSG00000015671.12	Psma2	-0.0109971	6.06835	0.0110199	0.916841	1	366	553	418	375	541	391	488	407	75	362	511	485
	ENSMUSG00000015672.5	Mrpl32	-0.254584	3.7377	2.00181	0.165514	0.662338	94	146	96	77	89	65	117	102	21	98	125	117
	ENSMUSG00000015697.15	Setdb1	0.00736259	5.96315	0.00612831	0.937934	1	443.18	593.5	409.85	405.68	423.15	324.47	482.53	387.76	80	369.83	449.84	464.72
	ENSMUSG00000015702.14	Anxa9	0.0676424	4.11451	0.278525	0.600148	0.921028	184	232	180	245	214	153	214	190	40	179	192	174
	ENSMUSG00000015709.10	Arnt2	0.143778	2.61563	0.551515	0.461389	0.845487	34	54.93	39	38.88	35	30	46.83	35	7	37	27	27
	ENSMUSG00000015711.9	Prune1	0.148746	4.30435	1.27402	0.264734	0.662939	153	161	112	130	158	126	158	129	26	93	123	128
	ENSMUSG00000015714.12	Cers2	-0.466839	6.32822	14.9399	0.00038417	0.0432403	302	583	461	307	454	273	567	479	101	449	592	627
	ENSMUSG00000015733.14	Capza2	-0.350514	7.92104	7.0574	0.0123687	0.282215	1156	2075	1713	1094	1843	1058	1915	1770	370	1523	1971	2133
	ENSMUSG00000015745.10	Plekho1	-0.337419	5.84833	4.93765	0.0344996	0.425319	256	351	259	161	330	177	321	311	58	227	375	379
	ENSMUSG00000015747.6	Vps45	0.0324946	3.55294	0.0567399	0.812759	1	77	107	90	77	84	77	88	79	17	82	76	89
	ENSMUSG00000015748.14	Prpf3	-0.0428073	4.8261	0.116341	0.734555	0.977799	175	265	161	143	169	173	192	186	38	148	215	182
	ENSMUSG00000015749.13	Anp32e	0.0796013	5.89613	0.471762	0.495547	0.859516	372	472	302	342	385	355	379	319	76	271	376	390
	ENSMUSG00000015750.16	Aph1a	-0.0843602	6.66505	0.920302	0.342297	0.747579	563.46	774.45	671.92	599.02	688.67	532.22	747.22	626.14	135.74	569.53	678.78	737.19
	ENSMUSG00000015755.17	Tab2	-0.196526	7.16793	3.76106	0.0584651	0.512857	830	1365	1151	953	1080	746	1315	1215	200	1045	1138	1182
	ENSMUSG00000015757.11	Ppil4	-0.107442	5.01271	0.619303	0.435696	0.82375	204	294	218	228	197	140	239	213	49	211	233	228
	ENSMUSG00000015759.12	Cnih1	0.0430097	4.98779	0.145366	0.704719	0.960559	200	295	254	267	263.98	197.81	268.98	220	48	205	222	271.99
	ENSMUSG00000015766.15	Eps8	-0.160939	6.73153	2.21507	0.143337	0.656041	502	820	632	365	718	464	635	642	132	517	680	716
	ENSMUSG00000015776.13	Med22	0.151053	5.40212	2.41705	0.126718	0.624553	282	378	300	292	301	264	325	258	43	253	296	263
	ENSMUSG00000015787.16	Abo	-1.2652	-1.62395	1.8952	0.215017	0.662338	0	0	0	0	0	0	0	0	0	1	0	0
	ENSMUSG00000015790.17	Surf1	0.16469	3.94622	1.5829	0.214548	0.662338	125	130	88	94	118	117.6	103	90	21	81	115	111
	ENSMUSG00000015804.15	Med28	0.00227033	4.85146	0.000351524	0.985121	1	232	238	226	178	252	168	226	198	56	151	233	228
	ENSMUSG00000015806.13	Qdpr	0.345386	4.48748	6.23752	0.0160601	0.315979	150	163.96	119	114	146	164	122	122	21	88	112	126
	ENSMUSG00000015812.9	Gnrh1	0.891442	-0.38066	2.07856	0.156001	0.662338	6	4	1	6	4	3	1	2	0	2	4	2
	ENSMUSG00000015829.14	Tnr	-0.433464	0.00223205	0.684285	0.412289	0.802606	3	3.03	3	1	3.04	2	4	4	0	4	3	3
	ENSMUSG00000015837.16	Sqstm1	0.0759906	7.64465	0.736418	0.395159	0.78775	1175.49	1461.83	1058.78	1183.88	1260.54	1077.96	1239.96	1109.83	218	958.98	1192.5	1227.07
	ENSMUSG00000015839.7	Nfe2l2	-0.064257	6.35553	0.166563	0.686788	0.950758	532	713	762	534	601	478	657	586	123	532	719	656
	ENSMUSG00000015843.11	Rxrg	0.83639	0.997253	6.78153	0.0122849	0.281297	13	15	12	10	22	12	13	7	0	7	4	10
	ENSMUSG00000015846.16	Rxra	-0.0305968	7.31689	0.11568	0.73528	0.978366	1092	1623	1287	1374	1303	967	1478	1321	252	1267	1130.98	1243
	ENSMUSG00000015850.12	Adamtsl4	0.134612	5.47468	1.47326	0.230886	0.662338	258	326	259	232	280	228	284	264	32	219	233	245
	ENSMUSG00000015852.14	Fcrls	0.0443725	-0.261842	0.00507795	0.943493	1	2	5	0	5	4	2	6	2	0	6	1	0
	ENSMUSG00000015854.8	Cd5l	-0.97906	0.60173	5.79925	0.020002	0.346113	6	5	3	2	3	3	4	9	4	4	8	8
	ENSMUSG00000015869.17	Prpsap1	-0.0255465	5.08737	0.0455059	0.831998	1	254	292	242	258	273	207	289	230	48	219	280	287
	ENSMUSG00000015879.9	Fam184b	0.224753	1.13464	0.473848	0.4946	0.858995	12.92	17.3	11.5	17.98	18.62	8.4	22.27	10.69	3	7.16	7	13.68
	ENSMUSG00000015880.14	Ncapg	-0.368504	3.99558	6.51408	0.0140064	0.296253	86.95	128.77	109.84	92.27	99.46	98.18	125.95	141.77	31.56	110.27	111.35	156.4
	ENSMUSG00000015882.19	Lcorl	-0.279996	5.20888	3.63865	0.0653814	0.537086	201.05	346.23	254.16	254.73	334.54	154.82	355.05	307.23	57.44	286.73	264.65	330.6
	ENSMUSG00000015889.9	Lta4h	-0.109393	5.28331	1.11306	0.296801	0.699695	253	343	244	238	290	255	297	285	46	273	289	347
	ENSMUSG00000015890.3	Amdhd1	0.537723	-0.835851	0.480216	0.491729	0.857471	3	5	1	3	2	0	1	3	0	2	1	1
	ENSMUSG00000015932.9	Dstn	0.00800031	8.04534	0.00608263	0.938166	1	2106	2988	2448	2466	2665	2147	2643	2457	404	2415	2587	2462
	ENSMUSG00000015937.16	Macroh2a1	-0.0461104	6.88272	0.185136	0.668959	0.940803	727.54	918	802.23	623.36	960.43	694.61	876.7	794.76	159.89	677.5	850.5	849.47
	ENSMUSG00000015942.10	Gtf2ird2	-0.0240992	3.42847	0.0275066	0.868984	1	55.79	77.51	63.85	65.05	61.09	55.42	65.48	56.2	9	67.34	61.32	77.57
	ENSMUSG00000015943.12	Bola1	0.392816	2.03253	2.51818	0.119235	0.611289	27	33	29	22	30	39	34	14	5	15	28	24
	ENSMUSG00000015944.10	Castor2	0.02244	5.39824	0.0448158	0.833257	1	232	321	231	218	254	153	278	212	39	211	222	238
	ENSMUSG00000015947.11	Fcgr1	-0.577419	7.42182	9.42813	0.00597222	0.19188	695	1251	1103	388	1087	623	1307	1183	250	825	1482	1491
	ENSMUSG00000015950.14	Ncf1	-0.328642	6.10163	8.76986	0.00478654	0.174224	351.21	419.49	344.15	244.95	335.91	267.58	499.52	376.8	62	332.66	431.68	480.43
	ENSMUSG00000015957.13	Wnt11	0.772201	2.35869	10.073	0.00265124	0.125219	51	42	19	41	37	38.59	35.38	11	8	19	25	16
	ENSMUSG00000015961.9	Adss	-0.132363	5.7299	1.97226	0.166772	0.662338	298	458	334	286	412	324	390	347	79	375	395	389
	ENSMUSG00000015962.6	1700016C15Rik	0	-1.59434	0	1	1	0	0	0	0	0	0	0	0	0	0	0	0
	ENSMUSG00000015966.18	Il17rb	-0.0842447	2.46062	0.163432	0.687847	0.951295	43	57	32	59	44	20	42	49	8	43	42	48
	ENSMUSG00000015968.19	Cacna1d	-0.138404	4.39101	1.17492	0.283912	0.685686	134.49	177.25	165.1	84.88	145.59	92.54	164.87	134.11	30.4	119.37	154.12	150.54
	ENSMUSG00000015970.20	Chdh	-0.0915705	5.39601	0.620555	0.43479	0.822754	355.51	477.75	344.9	391.12	323.41	192.46	401.13	376.89	74.6	371.63	274.7	386.46
	ENSMUSG00000015971.6	Actr8	-0.0388764	4.74921	0.124709	0.725559	0.97256	147	282	162	196	186	130	190	184	33	178	193	193
	ENSMUSG00000015980.15	Lrrc27	-0.238886	0.304599	0.339564	0.562862	0.899211	3	8	4	8	4.51	3	6	3	1	3	9	9.33
	ENSMUSG00000015981.13	Stk32c	0.130177	2.46072	0.303771	0.584134	0.911432	33	28	24	22	26	35	23	28	2	19	30	35
	ENSMUSG00000015994.11	Fnta	0.166704	5.44793	2.32474	0.134022	0.638381	311	348	272	309	321	306	284	291	40	265	313	285
	ENSMUSG00000016018.5	Mtrex	-0.0701004	5.54852	0.42694	0.516673	0.87386	299.72	415.62	336.17	286.94	368.91	273.44	360.67	326.49	76.93	278.99	349.97	375.52
	ENSMUSG00000016024.10	Lbp	0.379277	6.62577	3.72339	0.0679747	0.54772	581	952	768	555	942	731	626	464	122	464	827	473
	ENSMUSG00000016028.12	Celsr1	0.0897419	7.27721	0.91952	0.3425	0.747724	1222	1484	1223	1353	1425	1096	1349	1266	222	1193	1156	1194
	ENSMUSG00000016087.14	Fli1	-0.514942	5.08987	19.2065	6.52974e-05	0.0152475	133	224	187	123	188	109	249	232	31	184	231	281
	ENSMUSG00000016128.15	Stard13	0.216434	4.91328	3.73333	0.059367	0.515408	198	264	181	209.61	215	194	186	203	28	155	194	187
	ENSMUSG00000016150.16	Tenm1	-0.624286	-0.775992	0.625692	0.432907	0.821145	2	4.25	0	2	0	0	0	3	0	2.24	1.06	5
	ENSMUSG00000016179.12	Camk1g	1.08773	0.149638	6.35118	0.0151796	0.306195	8	8	9	8	9	5	4	3	0	3	6	3
	ENSMUSG00000016181.10	Utp25	0.176416	4.2932	2.14029	0.15012	0.662338	121	176	125	118	131	116	125	117	21	116	124	98
	ENSMUSG00000016194.15	Hsd11b1	-0.408324	2.97123	3.98832	0.0516155	0.49841	27	73	41	39	45	20	51	60	8	54	58	46
	ENSMUSG00000016200.15	Syt14	-0.649929	-0.334611	1.30473	0.259128	0.662338	1	1	1	1	6	2	4	4	0	0	3	6
	ENSMUSG00000016206.7	H2-M3	-0.509578	4.58063	4.71193	0.0417344	0.460491	99	136	100	41	142	126	145	148	33	95	180	190
	ENSMUSG00000016239.12	Lonrf3	-0.138816	2.98398	0.527643	0.471196	0.849417	52	58	56	41	58	54	73	59	11	44	61	59
	ENSMUSG00000016252.8	Atp5e	0.436194	5.67978	2.5124	0.129255	0.628984	385	303	213	304	427	460	259	251	67	199	267	288
	ENSMUSG00000016253.13	Nelfcd	0.170597	4.58979	1.8491	0.180366	0.662338	136	173	117	134	144	134	141	124	19	114	137	118
	ENSMUSG00000016255.6	Tubb1	0.686718	1.00887	2.02306	0.163097	0.662338	17	4	4	11	3	5	4	6	0	4	5	5
	ENSMUSG00000016256.11	Ctsz	-0.588957	7.63161	10.5934	0.00382979	0.152565	716	1135	830	437	1005	678	1072	1059	262	835	1374	1476
	ENSMUSG00000016257.16	Prelid3b	-0.0191504	5.06956	0.027371	0.869305	1	224	251	229	180	235	209	236	231	34	199	227	263
	ENSMUSG00000016262.15	Sertad4	-0.1573	4.92539	1.28095	0.264513	0.662659	198	295	259	253	279	156	311	303	46	281	200	242
	ENSMUSG00000016283.14	H2-M2	-0.318895	1.40693	1.18644	0.281594	0.683114	15	24	17	11	14	16	19	15	7	16	36	9
	ENSMUSG00000016308.13	Ube2a	-0.296986	3.87687	3.00269	0.0912811	0.579808	108	130	119	109	113	79	149	122	30	129	144	116
	ENSMUSG00000016319.4	Slc25a5	-0.0731163	7.67296	0.562436	0.457012	0.841696	1248.34	1868.61	1471.13	1409.53	1660.34	1334.74	1702.36	1531.92	288.97	1290.69	1734.73	1682.21
	ENSMUSG00000016327.10	Atp1b4	0.229806	0.656979	0.32759	0.569805	0.903427	2	15	8	16	8	9	13	4	2	13	4	6
	ENSMUSG00000016344.15	Ppdpf	0.279891	3.68497	3.38072	0.072276	0.548931	75.49	106.93	80	98.77	94	95.9	70	76	10	64	84	97
	ENSMUSG00000016346.18	Kcnq2	0.639736	0.531341	2.41848	0.126609	0.624553	9	6	9	15	4	5	6	4	0	7	3	7
	ENSMUSG00000016349.11	Eef1a2	0.640065	6.52088	10.4212	0.0042163	0.161688	780	750	367	735	787	486	559	422	50	429	375	408
	ENSMUSG00000016356.19	Col20a1	0.303435	2.18451	1.92612	0.171718	0.662338	30	34	22	40	50	17	18	25	2	30	30	31
	ENSMUSG00000016382.16	Pls3	0.196638	7.15018	4.19382	0.0461726	0.480601	1090	1448	1163	1227	1232	1224	1193	1089	160	1094	1109	1108
	ENSMUSG00000016386.16	Mpped2	0.918002	0.00792933	3.67847	0.0611966	0.521766	9	6	5	8	3	4	2	6	0	1	5	2
	ENSMUSG00000016409.5	Nkap	-0.0310507	4.26323	0.0668447	0.797115	1	149	172	130	120	156	121	144	136	24	124	164	165
	ENSMUSG00000016427.8	Ndufa1	0.137993	3.8881	0.383	0.541516	0.886401	84	92	58	84	99	69	94	69	5	70	74	82
	ENSMUSG00000016458.16	Wt1	1.13454	-1.56484	1.58842	0.264342	0.662338	0	0	0	0	1	0	0	0	0	0	0	0
	ENSMUSG00000016477.19	E2f3	-0.0364588	4.43343	0.0980977	0.755508	0.989243	126	185	142	117	171	138	152	151	26	134	143	177
	ENSMUSG00000016481.16	Cr1l	-0.119945	5.97374	1.11558	0.296263	0.699009	327.51	583.32	491.5	408.4	492.41	330.77	489.5	484.01	94.81	419.21	446.07	506.21
	ENSMUSG00000016487.16	Ppfibp1	0.141584	6.55557	2.77914	0.102139	0.599682	610	783	587	664	690	553	625	591	106	530	592.89	622
	ENSMUSG00000016493.14	Cd46	-0.296173	3.07093	2.59953	0.11358	0.599682	44.79	69.86	62.52	54.59	63.69	38.15	80.34	58.53	16.18	54.56	60.76	78.8
	ENSMUSG00000016494.10	Cd34	0.0554082	7.0946	0.280355	0.598957	0.920099	844.69	1207.82	848.95	879.92	930.91	669.74	977.86	796.77	138	936.81	775.88	890.84
	ENSMUSG00000016495.13	Plgrkt	-0.165706	4.76514	2.33253	0.133387	0.636758	168	268	171	157	202	140	225	177	42	169	221	225
	ENSMUSG00000016496.8	Cd274	-0.0757669	8.61952	0.344976	0.560997	0.897922	1691.98	3129.28	2816.26	1249.81	3033.79	2051.09	2836.92	2098.27	498.76	1818.56	2857.17	2416.58
	ENSMUSG00000016498.11	Pdcd1lg2	-0.901255	1.9029	10.6403	0.00206211	0.107824	3	17	27	6	29	10	29	23	5	27	34	30
	ENSMUSG00000016503.19	Gtf3a	0.131441	4.0161	0.762415	0.387006	0.780791	121.3	105.9	95.44	103.32	121.37	120.93	108	108.29	21.46	95.11	109.6	88.36
	ENSMUSG00000016510.12	Mtif3	-0.0731222	4.03385	0.320968	0.573717	0.905352	119.7	156.1	111.56	106.68	108.63	79.07	115	106.71	27.54	103.89	126.4	129.64
	ENSMUSG00000016520.8	Lnx2	-0.0116932	4.5449	0.00946764	0.9229	1	154	187	181	159	200	161	181	182	31	157	192	174
	ENSMUSG00000016524.13	Il19	0.82683	-1.34569	0.73507	0.395588	0.787872	1	1	0	2	1	0	0	0	1	0	0	1
	ENSMUSG00000016526.9	Dyrk3	-0.0331294	1.64149	0.0147625	0.903811	1	15	14	19	12	20	12	18	11	0	12	21	22
	ENSMUSG00000016528.11	Mapkapk2	0.0331962	7.56349	0.0992736	0.754095	0.988403	1096	1432	1067	933	1326	1088	1122	1151	214	901	1247	1250
	ENSMUSG00000016529.6	Il10	0.239826	2.49855	1.08108	0.30388	0.707094	38	49	57	15	41	47	46	31	8	19	30	48
	ENSMUSG00000016534.16	Lamp2	-0.226859	8.64343	3.03574	0.0910417	0.578896	2125	4142	3503	2290	3316	2066	3644	3118	672	2925	3456	3460
	ENSMUSG00000016541.11	Atxn10	-0.257252	5.57412	6.81676	0.0120755	0.278716	270	342	273	330	337	237	381	316	73	311	377	381
	ENSMUSG00000016552.14	Foxred2	0.251319	3.3534	2.68661	0.107862	0.599682	56	81	79	74	63	55	66	70	6	53	58	49
	ENSMUSG00000016554.10	Eif3d	0.00933668	6.00514	0.00901635	0.924754	1	453.75	607.72	438.35	400.25	463.86	468.54	488.84	455.15	103.25	402.08	477.84	475.71
	ENSMUSG00000016559.15	H3f3b	-0.00849634	8.88291	0.0041153	0.949258	1	2232.77	3142.74	2830.04	1962.7	3640.65	2571.12	2872.39	2764.99	512	2232.67	2935.05	2980.03
	ENSMUSG00000016619.11	Nup50	-0.128683	5.78005	1.58709	0.213952	0.662338	330	404	322	293	358	308	403	345	71	285	421	390
	ENSMUSG00000016624.16	Phf21b	0.0579293	0.535331	0.0257141	0.901674	1	2	9	9	9	7	8	9	3	1	4	8	12
	ENSMUSG00000016637.8	Ift27	0.197573	2.60888	1.11752	0.295847	0.698419	35	48	25	45	42	45	46	34	8	28	31	34
	ENSMUSG00000016664.17	Pacsin2	-0.19455	6.4976	3.79382	0.0574189	0.508396	409	637	502	399	556	398	584	501	95	479	578	650
	ENSMUSG00000016756.18	Cmah	0.0645424	3.90642	0.185784	0.668416	0.940561	101	115	104	68	131	80	91	82	16	90	126	92
	ENSMUSG00000016757.12	Ttll12	-0.0527442	4.83895	0.237904	0.627988	0.931721	176	239	184	161	218	187	201	205	31	196	212	214
	ENSMUSG00000016758.5	Bik	0.825748	0.480845	4.66644	0.0358807	0.430979	7	12	8	5	12	11	6	3	0	3	6	9
	ENSMUSG00000016763.16	Scube1	0.823594	1.46596	8.20985	0.00620842	0.195367	16	21	13	24	19	12	8	7	1	15	9	11
	ENSMUSG00000016831.13	Tox4	-0.0661749	6.59654	0.535984	0.467731	0.849417	577.75	806.69	682.88	602.65	741.56	560.46	771.94	685.44	126.72	552.66	717.02	764.77
	ENSMUSG00000016833.15	Mrps18c	-0.0759183	4.03736	0.119113	0.732903	0.976912	79	114	78	80	94	65.98	107	73.8	25	62	107	79.92
	ENSMUSG00000016918.16	Sulf1	0.145437	6.13716	1.89796	0.174821	0.662338	415	679	496	399	543	387	447	443	84	391	463	429
	ENSMUSG00000016921.15	Srsf6	0.0946825	7.48639	0.942334	0.33664	0.742149	1274	1509	1255	1241	1470	1151	1394	1138	191	1117	1370	1376
	ENSMUSG00000016933.18	Plcg1	0.0822718	6.45782	0.707953	0.404378	0.795253	609.91	811.8	636	647.96	642.93	518.9	662.94	634.89	108	589	579.75	597.8
	ENSMUSG00000016940.19	Kctd2	0.204221	4.54381	2.23896	0.141246	0.65129	168	202	144	165	164	149	152	118	29	136	159	150
	ENSMUSG00000016942.7	Tmprss6	0.197073	0.162918	0.187121	0.667299	0.940031	6	10	2	4	4	6	6	7	1	1	6	3
	ENSMUSG00000016946.7	Kctd5	0.0613031	5.14805	0.330233	0.568258	0.902817	265	338	298	355	299	282	315	310	47	276	305	301
	ENSMUSG00000016982.7	Pom121l2	1.14315	-1.53456	1.50009	0.264342	0.662338	0	0	1	0	0	0	0	0	0	0	0	0
	ENSMUSG00000016984.8	Etaa1	-0.070755	3.85809	0.26514	0.60902	0.927265	104	132	137	96	101	94	119	120	22	105	111	128
	ENSMUSG00000016995.18	Matn4	0.768918	2.3917	10.597	0.0021018	0.10924	42.93	37	19	38	41	32	19	20	4	28	19	16
	ENSMUSG00000017002.15	Slpi	-0.0153277	3.95355	0.00553708	0.941208	1	80	106	99	31	80	95	67	78	17	57	110	102
	ENSMUSG00000017007.10	Rbpjl	1.07753	0.0733731	5.03976	0.0295089	0.404512	6.07	3	2	7	9	8	3	3	1	4	2	1
	ENSMUSG00000017009.4	Sdc4	0.233106	8.00638	5.67863	0.0212605	0.356336	1800	2229	2003	1624	2222	1935	1846	1707	280	1460	2030	1576
	ENSMUSG00000017057.10	Il13ra1	0.0474736	7.33446	0.10723	0.745943	0.98419	1052	1733	1668	971	1575	1221	1499	1294	247	1134	1451	1252
	ENSMUSG00000017119.21	Nbr1	0.0492403	6.89401	0.230304	0.633521	0.931721	868	961	794	813	868	647	871	785	152	731	813	791
	ENSMUSG00000017132.18	Cyth1	-0.0600256	5.59308	0.344021	0.560319	0.897459	302	379	305	241	367	271	362	321	72	259	320	323
	ENSMUSG00000017144.9	Rnd3	0.126152	6.15276	1.33424	0.253882	0.662338	476	617	534	413	588	476	550	482	79	402	527	459
	ENSMUSG00000017146.13	Brca1	-0.214742	4.46347	2.83971	0.0985797	0.599682	103	163	153	108	136	159	168	143	37	133	169	170
	ENSMUSG00000017167.7	Cntnap1	0.579762	2.39268	8.44993	0.00555065	0.185978	49.41	65	33.41	42.25	42.01	52.27	39.38	22.22	6	24.31	38.74	35.06
	ENSMUSG00000017176.18	Nt5c3b	0.0897111	3.42938	0.402601	0.528821	0.880744	89	117.61	76.18	63.18	80.06	64.2	73.06	85.36	16	75.08	75.1	68.04
	ENSMUSG00000017188.4	Coa3	-0.0738274	3.6581	0.231059	0.632966	0.931721	78	105	63	72	69	87	80	72	20	72	92	92
	ENSMUSG00000017195.16	Zpbp2	-0.611432	-1.13157	0.540152	0.466015	0.849147	1	1	2	0	1	0	1	1	0	2	2	1
	ENSMUSG00000017204.5	Gsdma	0.0947286	4.51213	0.529417	0.470455	0.849417	224.96	336	285	380.95	246.98	239	293	279	50	276.98	261	230
	ENSMUSG00000017210.15	Med24	0.149826	5.40468	1.91891	0.172506	0.662338	268	384	324	332	368	232	322	257	49	260	291	316
	ENSMUSG00000017211.15	Gsdma2	0.598259	-1.34166	0.441461	0.50966	0.86895	1.04	1	0	2.05	2.02	0	0	0	1	2.02	0	0
	ENSMUSG00000017221.15	Psmd3	-0.0697125	6.77669	0.610925	0.438353	0.825875	641	944	728	648	744	629	827	764	134	641	832	765
	ENSMUSG00000017264.17	Exosc10	-0.0461916	5.41984	0.226085	0.636641	0.931721	238	384	278	247	313	246	325	280	47	263	317	305
	ENSMUSG00000017286.16	Glod4	0.0487042	4.86136	0.106625	0.745921	0.98419	198	232	183	196	255.35	228.58	183	195	71.08	178	195.31	199
	ENSMUSG00000017288.16	Vps53	-0.0451964	5.38122	0.226622	0.636242	0.931721	249	330	272	269	292	250	288	288	59	241	314.69	286
	ENSMUSG00000017291.14	Taok1	-0.0654406	8.16638	0.350697	0.556553	0.894956	1849	3006	2446	2400	2491	1552	2702	2289	422	2328	2301	2378
	ENSMUSG00000017299.14	Dnttip1	-0.0127442	3.97075	0.00897081	0.969995	1	86	108	96	88	104	72	110	93	21	69	91	96
	ENSMUSG00000017300.10	Tnnc2	0.749026	6.26169	5.84916	0.02567	0.384488	567.49	471.33	186.38	522.1	487.86	433.87	351.02	285.49	18.78	270.28	265.63	268.31
	ENSMUSG00000017307.17	Acot8	0.0606064	3.33786	0.184815	0.669229	0.940861	65.84	81.66	58.65	78.67	82.27	62.51	63.37	77.09	12.91	57.4	76.16	69.97
	ENSMUSG00000017309.12	Cd300lg	0.33275	3.13085	3.15899	0.0819702	0.553865	59	90	47	76	47	36	61	47	8	51	29	46
	ENSMUSG00000017311.16	Pyy	0.43033	-0.0839945	0.777785	0.3823	0.776316	9	10	2	5	15	1	6	4	1	8	7	0
	ENSMUSG00000017314.13	Mpp2	0.152684	2.58352	0.524882	0.472352	0.849417	49	48	41	45	31	40	52	23	11	37	36	37
	ENSMUSG00000017344.5	Vtn	0.102519	1.54934	0.152587	0.697837	0.956656	15	16	14	18	27	19	17	12	2	18	22	18
	ENSMUSG00000017376.16	Nlk	-0.121415	4.50793	1.05434	0.309758	0.713956	131	193	162	166	164	96	157	170	25	164	163	183
	ENSMUSG00000017386.11	Traf4	-0.115664	3.02216	0.464575	0.498833	0.861594	42	62	46	45	46	43	56	59	6	47	63	39
	ENSMUSG00000017390.16	Aldoc	0.276806	1.7522	1.66382	0.203389	0.662338	24	35	34	39	26	26	25	31	7	28	17	21
	ENSMUSG00000017400.11	Stac2	0.288231	1.83739	1.28164	0.263327	0.662338	21	38	29	23	22	36	28	18	3	28	28	16
	ENSMUSG00000017404.13	Rpl19	-0.0486081	7.93299	0.254256	0.616446	0.930802	1417.41	1789.72	1479.74	1371.04	1797.82	1185.26	1588.33	1635.29	275.43	1420.85	1590.35	1618.94
	ENSMUSG00000017405.15	Nek8	0.00726923	3.15219	0.00205731	0.964014	1	59	57	49	63	64	44	47	46	15	61	51	64
	ENSMUSG00000017412.16	Cacnb4	-0.305345	2.14053	1.60272	0.211747	0.662338	13.71	45.75	34.07	26.15	31.15	13.86	33.88	39.11	6.82	36.7	23.21	31.87
	ENSMUSG00000017417.15	Plxdc1	-0.172083	3.74731	1.2647	0.266464	0.664856	91	166	78	89	87	42	116	95	23	104	79	103
	ENSMUSG00000017418.15	Arl5b	-0.0761009	5.76774	0.485925	0.489179	0.855317	464	582	496	473	516	339	529	505	88	500	521	480
	ENSMUSG00000017421.19	Zfp207	-0.137506	7.11172	1.03182	0.318025	0.722996	880	1467	1159	1068	1180	779	1284	1178	226	1020	1244	1211
	ENSMUSG00000017428.17	Psmd11	0.045247	6.89955	0.230771	0.633177	0.931721	701.93	970.26	708.35	711.88	847.6	729.21	764.94	726.04	143.69	641.31	827.82	816.64
	ENSMUSG00000017446.15	C1qtnf1	0.387004	4.81483	8.83287	0.00464962	0.172026	167.7	235.65	169.01	203.3	175.09	121	149	132.09	28	139	144.6	106.66
	ENSMUSG00000017453.5	Pipox	0.868496	0.167446	3.27849	0.0765779	0.548931	11	6	7	4	4	4	6	4	0	4	1	2
	ENSMUSG00000017466.10	Timp2	0.284984	8.28282	9.20123	0.0039278	0.155055	1953	2588	1754	2248	2058	1371	1840	1594	285	1647	1529	1625
	ENSMUSG00000017478.16	Zc3h18	0.11968	6.16332	1.07215	0.30575	0.70942	456	534.97	389	376.93	453.83	482.96	460.98	418.91	74	346	431.96	447.99
	ENSMUSG00000017485.12	Top2b	0.0398617	7.43889	0.179742	0.673526	0.943717	1337.87	1697.69	1369	1382.7	1547.98	1285.9	1456.82	1359.88	244	1394.35	1411.93	1466.82
	ENSMUSG00000017491.10	Rarb	-0.06556	0.442602	0.0283776	0.866946	1	9.13	8.31	3	6.3	5.02	5.1	7.18	6.12	1	11.65	2.07	5.18
	ENSMUSG00000017493.13	Igfbp4	0.295774	8.05268	4.95329	0.0334681	0.419768	1894	1710	1231	1442	1484	1169	1160	1271	231	1148	1227	1273
	ENSMUSG00000017499.16	Cdc6	-0.29693	3.26294	2.85712	0.0975823	0.597472	46	56	52	46	51	68	67	71	15	48	58	82
	ENSMUSG00000017548.16	Suz12	-0.119815	6.00518	1.26939	0.265592	0.663957	384	537	441	405	511	334	472	453	93	415	469	532
	ENSMUSG00000017550.15	Atad5	-0.108446	4.65667	0.680695	0.413509	0.803721	124	231	172	137	210	189	203	208	30	175	196	189
	ENSMUSG00000017561.17	Crlf3	-0.114898	5.54028	0.896	0.34869	0.752876	286	356	263	191	335	242	279	283	67	238	363	311
	ENSMUSG00000017588.3	Krt27	-0.204356	1.64302	0.506957	0.480908	0.850378	33	80	34	20	18	13	16	33	8	28	56	49
	ENSMUSG00000017607.10	Tns4	0.019638	7.39766	0.0213997	0.884688	1	1326	1913	1414	1676	1502	1080	1655	1485	268	1522	1175	1465
	ENSMUSG00000017615.13	Tnfaip1	0.025761	6.38175	0.0952014	0.759027	0.9909	550	727	579	584	605	556	633	600	110	517	615	603
	ENSMUSG00000017631.20	Abr	-0.320209	7.20967	9.9286	0.00282799	0.128238	653	1050	775	651	893	669	1018	930	198	745	1065	1048
	ENSMUSG00000017639.14	Rab11fip4	0.13179	5.22738	1.49163	0.228045	0.662338	265	337	248	324	310	238	285	248	55	217	248	299
	ENSMUSG00000017652.17	Cd40	-0.218776	4.90815	1.79518	0.190488	0.662338	142	212	246	80	211	162	194	204	42	132	265	220
	ENSMUSG00000017664.17	Slc35c2	-0.309353	4.62724	7.27763	0.00966036	0.248255	127	194	157	124	132	118	182	158	32	150	181	212
	ENSMUSG00000017667.10	Zfp334	0.138741	3.009	0.664188	0.419189	0.808871	43	62	41	41	59	37	48	30	7	34	43	61
	ENSMUSG00000017670.17	Elmo2	-0.325464	6.20042	10.8211	0.00190478	0.102536	388	567	470	322	505	330	548	477	114	441	594	573
	ENSMUSG00000017677.12	Wsb1	-0.190014	6.11584	3.47473	0.0685555	0.548931	410	562	449	316	446	365	481	435	97	377	531	580
	ENSMUSG00000017679.17	Ttpal	-0.0389771	6.29333	0.153409	0.697066	0.956273	612	833	680	793	741	538	759	759	127	641	723	746
	ENSMUSG00000017686.18	Rhot1	0.0664605	5.43664	0.495496	0.484953	0.853135	313	369	299	298	384	286	319	302	63	281	332	305
	ENSMUSG00000017688.15	Hnf4g	1.29118	-1.39654	1.59827	0.218105	0.662338	0	1	1	1	0	1	0	0	0	0	0	1
	ENSMUSG00000017692.9	Rhbdl3	0.223784	2.87937	1.3168	0.256966	0.662338	47	53	35	54	55	48	36	45	7	37	54	39
	ENSMUSG00000017697.4	Ada	-0.448432	2.52753	5.56171	0.0225616	0.366295	25	43	26	23	33	28	40	37	5	39	44	47
	ENSMUSG00000017707.10	Serinc3	-0.186946	8.29381	2.5675	0.116692	0.605683	1847	2717	2204	1940	2119	1294	2415.98	2185	439	2070	2211.99	2468.97
	ENSMUSG00000017713.10	Tha1	0.0752777	2.41246	0.126271	0.723918	0.97148	32.82	43	26	23	30	25	31	37	6	16	30	27
	ENSMUSG00000017715.12	Pgs1	0.172572	7.07908	2.65743	0.10974	0.599682	804	980	893	644	1035	832	853	745	141	573	926	793
	ENSMUSG00000017716.16	Birc5	-0.112344	3.91195	0.608359	0.43931	0.826297	85	91	86	77	124	103	91	92	24	86	108	126
	ENSMUSG00000017718.16	Afmid	0.190372	1.95411	0.422089	0.519663	0.874989	34	25.96	21	18.47	23.67	13.79	15.92	30.29	0	24.41	25.99	9
	ENSMUSG00000017720.3	Trp53tg5	0.0631772	-1.17904	0.00519638	0.942839	1	1	1	2	1	1	0	1	1	0	0	1	2
	ENSMUSG00000017721.16	Pigt	-0.0816287	5.94919	0.336925	0.565883	0.90147	358	532	438	440	456	314	485	470	77	402	443	456
	ENSMUSG00000017723.12	Wfdc2	-0.605707	-0.753728	0.826953	0.367787	0.769177	2	2	1	1	1	3	5	3	0	0	5	1
	ENSMUSG00000017724.15	Etv4	0.0540732	3.22799	0.0792124	0.779739	0.99853	59	74	64	56	64	109	65	79	10	59	67	86
	ENSMUSG00000017734.16	Dbndd2	0.550915	3.55202	10.0039	0.00273438	0.126898	80.84	105	87	92	85.84	80.43	77.11	51.46	10	67	59.3	50.61
	ENSMUSG00000017737.3	Mmp9	0.523168	5.36451	4.92593	0.0383682	0.442403	329	211	132	301	238	133	177	123	31	194	142	141
	ENSMUSG00000017740.18	Slc12a5	0.441985	0.782015	1.67116	0.202412	0.662338	12	17	9	10	12	5	8	11	3	6	6	6
	ENSMUSG00000017747.14	Ghdc	-0.222264	3.43861	2.05791	0.158028	0.662338	45	75	58	45	78	58	70	64	14	64	72	76
	ENSMUSG00000017754.14	Pltp	-0.130104	6.25667	1.68583	0.200476	0.662338	425.31	625.98	420.07	429.66	535.39	302.28	589.39	471.49	77.21	462.81	484.3	526.25
	ENSMUSG00000017756.10	Slc12a7	-0.142016	6.41502	2.38091	0.129522	0.629457	432	664	528	397	602	425	570	511	100	480	623	629
	ENSMUSG00000017760.17	Ctsa	-0.244727	7.12986	6.40908	0.014751	0.303304	881.56	1327.53	1034.89	964.57	1090.61	706.32	1197.36	1167.28	212.75	1039.88	1203.5	1323.51
	ENSMUSG00000017764.3	Zswim1	-0.193354	3.73612	1.93485	0.170768	0.662338	77	120	111	122	102	83	121	132	22	93	140	102
	ENSMUSG00000017765.18	Slc12a4	0.259704	6.13047	5.64175	0.0216619	0.359307	507.78	557.91	455.75	382.68	535.67	444.88	450.62	406.82	68	344.96	410.93	436.86
	ENSMUSG00000017767.4	Spata25	0.73394	-0.506156	1.17169	0.284569	0.686271	2	4	1	4	1	2	2	2	0	2	0	1
	ENSMUSG00000017774.20	Myo1c	0.0192653	7.8109	0.051055	0.822216	1	1337	1757	1325	1216	1584	1318	1559	1343	258	1208	1466	1502
	ENSMUSG00000017776.16	Crk	0.0511189	7.29552	0.288366	0.593799	0.917092	988	1242	1087	942	1083	873	1121	979	172	865	1040	1090
	ENSMUSG00000017778.15	Cox7c	0.0528868	5.74717	0.0696888	0.794433	1	321.42	389.16	266.62	316.23	341.46	297.1	302.54	331.43	51.11	288.59	325.27	333.27
	ENSMUSG00000017781.18	Pitpna	-0.185697	7.67632	3.59584	0.0640706	0.532304	1053	1403	1202	842	1238	953	1363	1237	227	963	1357	1500
	ENSMUSG00000017801.16	Mlx	-0.333938	4.42435	7.2529	0.00977597	0.249929	122.65	179.15	147.55	133.18	140.21	125.1	178.52	164.17	37.9	152.1	191.6	193.07
	ENSMUSG00000017802.15	Retreg3	-0.00100781	5.92468	0.000114644	0.991502	1	418	561	437	437	415	357	475	487	79	361	404	479
	ENSMUSG00000017817.12	Jph2	0.600612	5.43835	9.4368	0.00570778	0.187912	337	362	169	391	307	241	256	196	25	196	181	204
	ENSMUSG00000017830.16	Dhx58	-0.193194	6.54398	1.74885	0.197182	0.662338	371.85	658.96	689.98	275.93	614	438	632.97	578.98	109	397.96	690	603.82
	ENSMUSG00000017831.9	Rab5a	-0.0326484	6.46258	0.0944056	0.760004	0.99149	668.42	966.17	815.55	874.39	835.44	546.69	938.18	804.49	140.83	767.46	730.59	794.65
	ENSMUSG00000017832.3	Hspb9	0.203234	1.29354	0.386525	0.537131	0.88538	18	12	8	10	17	17	18	10	3	9	7	15
	ENSMUSG00000017837.13	Nkiras2	-0.187398	5.44844	3.26772	0.0770471	0.548931	233.69	347.58	350.66	265.24	339.35	260.17	372	360	61	291	335.26	361.71
	ENSMUSG00000017843.15	Ppp2r5c	-0.134167	6.87743	2.51131	0.119727	0.612349	769	909	690	692	910	649	846	795	172	779	851	897
	ENSMUSG00000017858.13	Ift52	-0.0425463	4.47862	0.154425	0.696116	0.955581	140	194	139	174	180	141	192	171	30	123	177	176
	ENSMUSG00000017861.12	Mybl2	-0.0492788	3.46765	0.0969216	0.792517	1	48.9	80.8	51.67	52.6	59.99	61.78	60.36	54.64	16	47.19	69.51	66.13
	ENSMUSG00000017868.17	Sgk2	-0.50566	-1.0925	0.272595	0.604044	0.923912	1	1	0	1	0	0	1	0	0	1	2	0
	ENSMUSG00000017897.19	Eya2	-0.137156	1.76865	0.242639	0.624596	0.931721	21	27	14	18	12	9	23	18	2	12	25	17
	ENSMUSG00000017929.14	B4galt5	-0.0462225	7.32787	0.132042	0.718598	0.968006	805	1145	1037	532	1082	797	1024	847	175	645	1172	972
	ENSMUSG00000017943.16	Gdap1l1	0.864463	-0.950541	1.16657	0.28561	0.687839	1	1	2	4	2	1	1	1	0	0	1	2
	ENSMUSG00000017950.17	Hnf4a	1.14315	-1.50683	1.4449	0.264342	0.662338	0	0	1	0	0	0	0	0	0	0	0	0
	ENSMUSG00000017969.14	Ptgis	0.482651	4.93278	19.0579	6.90099e-05	0.0157393	173.93	233	171	200	198	148	159	112	26	118	134	146
	ENSMUSG00000017978.19	Cadps2	0.372544	1.47092	1.7993	0.186232	0.662338	8	30	13	10	16	13	10	13	2	9	15	10
	ENSMUSG00000017999.17	Ddx27	0.183379	5.12953	2.3496	0.132009	0.63426	204	255	206	214	269	233	211	228	37	164	200	222
	ENSMUSG00000018001.19	Cyth3	0.0131975	6.82777	0.0197265	0.888903	1	698	864	713	682	742	569	821	677	110	630	724	778
	ENSMUSG00000018008.9	Cyth4	-0.389125	7.36926	7.08984	0.0130723	0.288935	695	1075	867	378	865	467	936	887	190	692	1024	1087
	ENSMUSG00000018012.12	Rac3	0.310616	1.85064	1.54756	0.219655	0.662338	29	28	20	35	33	17	27	26	4	18	23	15
	ENSMUSG00000018040.10	Rrp7a	0.0394005	6.00294	0.0919493	0.763431	0.993127	374.76	453.75	337.67	338.06	390.65	330.35	374.96	370.96	51.88	345.39	425.94	347.13
	ENSMUSG00000018042.19	Cyb5r3	0.18698	7.18181	4.34116	0.0426563	0.466194	906	1141	876	938.98	1077.96	874.97	969	879	160	749	807	873
	ENSMUSG00000018068.14	Ints2	-0.0715661	5.04982	0.493208	0.485958	0.853623	206.2	305.62	238.33	208.46	242.07	206.56	255.73	243.47	44.76	213.12	276.54	248.44
	ENSMUSG00000018076.13	Med13l	0.0813006	8.04722	0.893462	0.349367	0.753598	1635	2159	1891	1789	2018	1473	2039	1712	328	1577	1666	1636
	ENSMUSG00000018102.6	H2bc4	-0.233674	5.18292	1.2083	0.284538	0.686245	201.12	406.42	259.99	282.08	319.19	182.16	334.06	303.68	77.56	272.06	320.88	302.52
	ENSMUSG00000018126.16	Baiap2l2	-0.355739	0.169684	0.858914	0.35877	0.761206	8	13	4	6	4	6	7	6	2	9	7	14
	ENSMUSG00000018143.11	Mafk	0.256463	6.14398	5.42796	0.0241557	0.377344	488.89	538.77	424	352.1	467	431	446.83	360	72.81	295.8	447.58	348.22
	ENSMUSG00000018160.16	Med1	-0.129811	6.7307	1.96984	0.167027	0.662338	629	923	808	682	712	561	784	804	147	691	851	800
	ENSMUSG00000018166.9	Erbb3	0.107197	6.48022	1.24808	0.269589	0.669272	785	997	1015	960	832	679	944	801	157	821	766	738
	ENSMUSG00000018167.11	Stard3	-0.0909445	5.04635	0.648806	0.42459	0.814073	163	233	193	143	191	151	209	166	32	150	199	243
	ENSMUSG00000018168.9	Ikzf3	-0.547312	4.18987	15.122	0.000315136	0.0380872	82	133	82	46	84	72	130	105	25	93	123	148
	ENSMUSG00000018169.13	Mfng	-0.227744	2.62163	1.27813	0.263974	0.662338	32	33	31	26	36	27	46	35	1	34	32	46
	ENSMUSG00000018171.10	Vmp1	-0.443155	7.22429	11.4948	0.00188802	0.102536	667	1269	1147	574	943	677	1173	1129	224	944	1305	1376
	ENSMUSG00000018189.13	Uchl5	-0.0938829	4.10649	0.563393	0.456632	0.841573	88	138	113	98	132	119	127	118	19	116	130	133
	ENSMUSG00000018196.19	Glrx2	0.11525	4.64157	0.977234	0.327936	0.733831	181	283	178	214	197	162	190	181	40	184	158	200
	ENSMUSG00000018199.10	Ro60	-0.00186872	5.5503	0.000326139	0.985668	1	343	466	416	376	409	318	414	372	69	362	383	428
	ENSMUSG00000018209.16	Stk4	-0.244717	6.68969	7.1069	0.010489	0.260103	534	822	685	598	669	515	754	727	161	649	801	753
	ENSMUSG00000018217.13	Pmp22	0.148574	6.93328	1.02495	0.320655	0.726307	705	1171	840	775	913	517	842	677	131	687	717	755
	ENSMUSG00000018238.7	Gdf9	0.810077	-0.652406	0.979122	0.32748	0.733471	3	2	0	2	3	3	0	3	1	0	1	1
	ENSMUSG00000018239.10	Zcchc10	-0.138698	2.34082	0.482573	0.490674	0.856591	27	45	31	19	38	27	40	28	7	25	45	32
	ENSMUSG00000018263.12	Tbx5	0.571564	0.0758851	1.14395	0.290272	0.692434	7	5	4	2	5	3	3	2	0	4	5	1
	ENSMUSG00000018286.7	Psmb6	0.164154	6.11708	1.64411	0.207774	0.662338	406	496	374	425	527	481	450	407	74	324	444	422
	ENSMUSG00000018287.13	Spag7	0.0462783	3.99072	0.112076	0.73928	0.980699	95	132	75	84	116	102	92	107	21	86	97	98
	ENSMUSG00000018293.5	Pfn1	-0.368039	8.47612	11.5674	0.0013773	0.0886958	1512	2253	1627	1277	2143	1588	2209	2160	432	1700	2612	2442
	ENSMUSG00000018322.11	Tomm34	-0.158898	4.93994	2.31523	0.134801	0.639914	171	240	213	180	213	147	243	202	47	171	225	223
	ENSMUSG00000018326.10	Ywhab	-0.0971872	7.56345	1.40572	0.241718	0.662338	1047	1601	1211	1111	1375	1064	1346	1256	236	1117	1401	1535
	ENSMUSG00000018334.19	Ksr1	0.485593	5.68657	17.9138	0.000106126	0.0198869	360	437	286	430	433	290	329	266	41	245	258	263
	ENSMUSG00000018339.13	Gpx3	0.512334	7.37967	12.4366	0.00157374	0.0944123	1432	1639	1170	1468	1392	1037	954	820	172	1023	1149	826
	ENSMUSG00000018340.14	Anxa6	-0.221437	7.09752	5.61093	0.0220037	0.362377	700	1013	698	538	775	542	898	799	149	650	871	932
	ENSMUSG00000018341.13	Il12rb2	-0.259242	3.54528	1.01765	0.323834	0.729212	46	105.46	102.24	40.25	107.42	44.74	100.16	83.27	16.12	63.33	116.92	76.69
	ENSMUSG00000018347.17	Zkscan6	-0.0922125	3.81677	0.410722	0.524711	0.877947	86	116	103	97	94	86	110	92	34	77	90	114
	ENSMUSG00000018362.15	Kpna2	-0.063919	5.83458	0.45526	0.503148	0.864556	373.76	459.94	368.87	362.99	435.36	385.77	426.62	406.2	87.25	363.84	424.33	438.59
	ENSMUSG00000018363.17	Smurf2	-0.0239883	6.02082	0.0663858	0.797797	1	384	540	444	464	441	382	471	444	92	442	475	389
	ENSMUSG00000018372.14	Cep95	-0.279494	3.11923	3.59652	0.0640465	0.532304	54	82	65	50	72	40	87	60	11	63	75	87
	ENSMUSG00000018377.11	Vezf1	-0.104506	6.17656	0.286146	0.598537	0.919859	419	758	537	539	515	292	672	495	105	527	479	514
	ENSMUSG00000018378.14	Cuedc1	0.472601	5.39842	13.2058	0.000735514	0.0617008	302	314	230	316	286	235	253	212	24	184	185	227
	ENSMUSG00000018379.18	Srsf1	0.021729	7.65799	0.0618139	0.804733	1	1401	1739	1404	1314	1562	1509	1564	1387	270	1296	1651	1536
	ENSMUSG00000018381.16	Abi3	-0.42163	4.60063	8.76627	0.00479447	0.174224	141.09	180.35	82.25	110.15	145.76	104.71	138.97	166.17	44.88	136.38	152.62	216.91
	ENSMUSG00000018387.13	Shroom1	-0.765231	-0.235949	1.87838	0.177019	0.662338	2	4	1	2	1	5	1	6	0	3	10	3
	ENSMUSG00000018395.20	Kif3a	0.107721	3.33322	0.502718	0.481805	0.851245	59	80	77	63	49	64	65	52	12	58	76	53
	ENSMUSG00000018398.19	Septin8	-0.0148641	7.24815	0.0326728	0.857335	1	1040	1514	1179	1276	1266	1052	1327	1279	220	1146	1234	1239
	ENSMUSG00000018401.18	Mtmr4	-0.000484856	5.94454	2.52542e-05	0.996012	1	345	525	415	413	464	470	479	421	79	395	461	469
	ENSMUSG00000018405.8	Mrm1	0.065453	3.45429	0.119681	0.731119	0.976262	64	85	62	61	75	72	63	54	13	54	76	88
	ENSMUSG00000018411.18	Mapt	0.147872	3.47306	0.691849	0.409735	0.800197	86	74	39	85	65	56	85	57	10	53	65	51
	ENSMUSG00000018412.17	Kansl1	-0.0856524	6.79951	0.995334	0.323543	0.729201	571.83	947.26	709	714.54	862.59	580.27	820.44	807	142.28	670	789	781
	ENSMUSG00000018415.15	Gid4	0.0719993	5.55431	0.575974	0.451678	0.836983	321	439	382	393	349	269	399	315	63	340	323	332
	ENSMUSG00000018417.15	Myo1b	0.154733	5.40647	2.74131	0.104436	0.599682	286	417	299	361	359	291	332	300	60	270	289	305
	ENSMUSG00000018425.19	Dhx40	-0.0874263	4.82411	0.552483	0.460999	0.845131	211	229	196	178	207	155	216	213	38	183	216	220
	ENSMUSG00000018427.9	Ypel2	0.0968888	4.41397	0.498257	0.483746	0.852685	167	253	207	217	208	113	212	170	32	194	157	170
	ENSMUSG00000018428.16	Akap1	0.199664	5.14716	2.52682	0.11862	0.609864	254	301	220	248	232	182	218	216	41	180	221	203
	ENSMUSG00000018433.15	Nol11	-0.144465	4.96793	1.72355	0.195601	0.662338	207	284	208	197	249	188	265	248	48	219	247	240
	ENSMUSG00000018442.14	Derl2	-0.161818	5.4613	2.25087	0.140216	0.650016	246	383	318	279.86	275	250	333	291.04	64	271	370	363
	ENSMUSG00000018446.9	C1qbp	0.0802045	5.14132	0.518833	0.474901	0.849417	213	265	250	231	245	230	276	227	29	178	273	234
	ENSMUSG00000018449.13	Rpain	0.299858	2.63025	2.2728	0.138343	0.647099	37	43	38	39	38	46	38	27	9	35	37	22
	ENSMUSG00000018451.8	6330403K07Rik	0.269518	-0.262685	0.168199	0.683578	0.949309	2	7	1	6	1	0	2	4	0	1	2	3
	ENSMUSG00000018459.16	Slc13a3	-0.625718	2.60056	8.3726	0.00575409	0.188186	30	49	30	21	28	12	30	48	7	34	54	52
	ENSMUSG00000018470.9	Kcnab3	-0.463144	-0.191621	1.08736	0.302382	0.705758	4	5	5	7	2	1	5	6	1	3	7	7
	ENSMUSG00000018474.19	Chd3	-0.188415	5.99946	2.74474	0.104226	0.599682	345	482	286	316	346	229	411	351	74	329	363	424
	ENSMUSG00000018476.8	Kdm6b	0.0311538	6.80477	0.11075	0.74077	0.981625	640.91	954	780.73	577	726	578.86	776.86	670.85	127	614	772.79	640.68
	ENSMUSG00000018479.13	1700125H20Rik	-1.25365	-1.59332	1.86344	0.215017	0.662338	0	0	0	0	0	0	0	0	0	0	1	0
	ENSMUSG00000018481.10	Appbp2	-0.0518987	5.9552	0.306613	0.582387	0.910344	385	577	441	413	480	340.78	482	428	78.68	406	511	467
	ENSMUSG00000018486.3	Wnt9b	0.452503	-0.030392	0.564612	0.457289	0.842026	4	5	12	2	1	8	0	3	2	1	9	5
	ENSMUSG00000018500.3	Adora2b	0.251531	3.61624	2.2449	0.140765	0.650447	113	140	113	81	129	84	84	89	15	72	131	91
	ENSMUSG00000018501.18	Ncor1	-0.0830195	7.90885	0.924117	0.341308	0.746978	1528	2220	1616	1604	1880	1236	1950	1815	320	1592	1765	1782
	ENSMUSG00000018507.17	Trpv2	-0.446027	5.18399	7.4101	0.0109969	0.267155	131	187	216	85	213	147	203	212	42	172	266	260
	ENSMUSG00000018509.9	Cenpv	0.121634	1.82669	0.276476	0.601489	0.922157	30	25	19	25	23	16	28	17	4	22	20	19
	ENSMUSG00000018537.17	Pcgf2	0.13186	3.56139	0.829121	0.367166	0.76826	83	91	83	84	97	54	77	80	10	87	63	74
	ENSMUSG00000018541.11	Cwc25	-0.0468089	4.55649	0.169958	0.68202	0.948357	152	197	145	139	145	122	155	152	32	129	169	162
	ENSMUSG00000018543.9	1700001P01Rik	1.33083	-1.24789	2.10758	0.153203	0.662338	2	1	2	0	1	1	0	1	0	0	0	1
	ENSMUSG00000018547.9	Pip4k2b	-0.00812041	5.76107	0.00639756	0.936588	1	333	456	266	324	282	256	328	296	61	283	329	365
	ENSMUSG00000018548.16	Trim37	-0.0720806	4.87234	0.467809	0.49735	0.86079	200	232	186	186	210	171	188	212	42	185	199	248
	ENSMUSG00000018554.14	Ybx2	0.122762	0.341467	0.10358	0.749	0.985673	9	9	6	11	9	5	8	6	3	7	8	6
	ENSMUSG00000018559.17	Ctdnep1	-0.0490173	5.65871	0.227704	0.635439	0.931721	277	407	340	312	406	255	371	360	58	306	346	354
	ENSMUSG00000018565.18	Elp5	0.0497292	4.34708	0.176967	0.675907	0.945168	117	169	136	133	156	128	144	124	30	120	146	130
	ENSMUSG00000018566.15	Slc2a4	0.671509	4.80285	6.11063	0.0228762	0.367323	252	265	149	357	296	186	195	170	14	213	102	146
	ENSMUSG00000018567.15	Gabarap	-0.222353	7.29482	5.60097	0.0221155	0.36301	808	1195	994	717	1064	718	1075	1029	185	871	1178	1241
	ENSMUSG00000018569.13	Cldn7	-0.0268735	-0.787101	0.00196903	0.964794	1	3	1	1	1	1	4	2	3	0	2	2	1
	ENSMUSG00000018570.18	2810408A11Rik	0.0363514	0.119973	0.00795643	0.929302	1	7	4	9	11	4	4	7	4	4	4	6	7
	ENSMUSG00000018572.11	Phf23	-0.107754	5.28683	0.770088	0.384646	0.778674	275	291	221	164	224	184	222	261	47	177	300	262
	ENSMUSG00000018574.15	Acadvl	0.258884	5.51561	5.9034	0.0189796	0.338809	376.29	357.63	268.64	315.77	352.62	320.82	324.55	259.6	47.6	256.82	277.31	301.27
	ENSMUSG00000018581.16	Dnah11	1.27129	-0.836877	2.82833	0.0992378	0.599682	0	5.34	3.2	2.17	2.08	3.21	1.08	2.13	0	0	0	2.1
	ENSMUSG00000018583.6	G3bp1	0.132642	7.29984	2.01143	0.162705	0.662338	1016.68	1330.41	1025.89	1074.71	1088.04	1032.5	1150.85	976.06	184	866.01	1047.3	1010.1
	ENSMUSG00000018585.10	Atox1	0.0413696	5.02238	0.0727782	0.789125	1	222	359	251	264	282	236	292	267	48	206	281	265
	ENSMUSG00000018593.14	Sparc	0.325927	10.0633	7.77804	0.00777029	0.222387	6406	8010	5071	7113	6284	5117	4855	4704	916	4842	5211	5828
	ENSMUSG00000018595.7	Glra4	1.07988	-0.767511	2.39134	0.128705	0.628847	2	4	0	3	3	4	0	1	1	1	1	2
	ENSMUSG00000018599.6	Mief2	0.455939	4.27696	6.69251	0.0143614	0.299199	138	151	75	146	148	131	107	98	14	89	88	110
	ENSMUSG00000018604.19	Tbx3	0.14407	4.47242	1.20526	0.277856	0.678536	159	193	145	201	178	132	145	158	32	155	157	134
	ENSMUSG00000018620.4	Mmp20	1.12501	-1.62459	1.54155	0.264342	0.662338	0	1	0	0	0	0	0	0	0	0	0	0
	ENSMUSG00000018634.11	Crhr1	1.14637	-1.5637	1.488	0.264342	0.662338	1	0	0	0	0	0	0	0	0	0	0	0
	ENSMUSG00000018648.16	Dusp14	-0.102955	4.13666	0.388284	0.537381	0.885512	156	207	186	237	210	114	207	216	32	195	226	161
	ENSMUSG00000018651.15	Tada2a	0.0483411	3.4703	0.097844	0.755814	0.989531	78	98	78	85	55	71	92	73	9	77	68	79
	ENSMUSG00000018654.18	Ikzf1	-0.355733	6.62767	8.89999	0.00476777	0.174167	382	610	527	252	624	422	669	558	114	440	661	666
	ENSMUSG00000018656.6	Tcaf3	-0.157372	-1.4503	0.022541	0.88419	1	0	0	0	0	1	1	0	0	0	2	0	0
	ENSMUSG00000018659.13	Pnpo	0.0563791	3.67675	0.157791	0.692994	0.953995	100.8	119.87	82.59	98.39	89.07	101.4	104.9	87.59	19.73	70.37	103.19	109.75
	ENSMUSG00000018661.18	Cog1	-0.00727099	5.1968	0.00387485	0.950629	1	250.42	337.84	276.9	207.68	253.76	207.77	290.97	234.19	45.09	236.69	258.02	274.25
	ENSMUSG00000018666.14	Cbx1	0.0510208	5.41096	0.0837467	0.774785	0.996912	257	273	233	208	267	223	245	213	48	187	271	259
	ENSMUSG00000018669.15	Cdk5rap3	0.427673	4.7807	8.42094	0.00602012	0.192492	188.9	217	160	180	201	202	156	138	32.96	117	143	149
	ENSMUSG00000018672.16	Copz2	0.0216682	3.47912	0.0187914	0.891551	1	64	105	62	76	90	49	79	80	11	77	46	85
	ENSMUSG00000018677.10	Slc25a39	0.10775	5.02904	0.551576	0.462503	0.846323	206	301	204	221	245	204	197	221	37	186	246	226
	ENSMUSG00000018678.14	Sp2	-0.316842	4.47644	4.82496	0.0331211	0.417407	106	193	164	140	144	76	179	165	32	160	171	168
	ENSMUSG00000018697.15	Aatf	0.205042	4.70203	1.1905	0.285571	0.687826	182	142	122	139	196	194	170	146	21	106	169	146
	ENSMUSG00000018698.16	Lhx1	-1.25801	-1.59352	1.91399	0.215017	0.662338	0	0	0	0	0	0	0	1	0	0	0	0
	ENSMUSG00000018707.14	Dync1h1	-0.00339769	10.0563	0.001453	0.969755	1	6529.79	8394.93	7064.37	6110.19	7161.05	5829.86	7182.63	6724.57	1297.38	5928.43	7433.75	7136.22
	ENSMUSG00000018727.20	Cpsf4l	-0.310655	-0.142429	0.304515	0.583676	0.911131	2	6	2	3	0	2	3	8	1	1	2	1
	ENSMUSG00000018733.11	Pex12	0.112068	3.24665	0.592548	0.445281	0.831577	56	89	80	83	72	59	64	56	12	67	69	84
	ENSMUSG00000018736.15	Ndel1	-0.0217153	6.47536	0.0481435	0.827274	1	664	881	812	791	813	542	878	760	138	673	798	723
	ENSMUSG00000018740.15	Slc25a35	0.181744	2.5745	0.878473	0.353404	0.75663	36.13	65.35	39.06	50.39	47.85	54.28	51.93	44.69	5.12	44.27	35.79	44.96
	ENSMUSG00000018750.15	Zbtb4	0.0853109	6.22543	0.649949	0.424185	0.81364	521	692	509	519	464	362	565	474	79	490	419	491
	ENSMUSG00000018752.20	Tnfsfm13	-0.320198	2.19953	1.81953	0.183822	0.662338	24.37	31.04	22.53	21.02	16.33	17.13	31.38	17.46	8.94	29.07	25.75	27.11
	ENSMUSG00000018761.15	Mpdu1	-0.135201	4.59401	1.33489	0.253768	0.662338	151	152	171	149	170	140	174	149	36	147	187	196
	ENSMUSG00000018765.6	Fxr2	0.151413	5.81809	1.30198	0.26138	0.662338	403	445	305	375	343	312	346	289	63	308	343	356
	ENSMUSG00000018770.10	Atp5g3	0.192677	6.26941	3.31375	0.0750629	0.548931	438	613	400	577	575	590	515	432	82	411	516	504
	ENSMUSG00000018774.14	Cd68	-0.991904	6.66742	13.9778	0.00136851	0.0886958	298	757	619	287	538	215	944	878	167	638	907	1017
	ENSMUSG00000018776.11	Slc35g3	-0.779686	-1.11456	0.864558	0.35721	0.759782	0	2	1	1	1	0	3	1	0	0	2	2
	ENSMUSG00000018796.14	Acsl1	-0.021312	7.31825	0.0543971	0.816592	1	1286.74	1705.21	1357.7	1603.27	1480.71	1158.05	1584	1477.11	247.28	1512.27	1371.61	1431
	ENSMUSG00000018800.15	Abca5	0.114418	4.72984	0.769688	0.384769	0.778674	197	294	237	295	273	163	253	240	37	207	189	245
	ENSMUSG00000018809.3	Smyd4	0.120578	3.03161	0.425472	0.517391	0.874031	58	53	56	60	58	26	52	56	9	44	38	48
	ENSMUSG00000018819.11	Lsp1	-0.230823	7.10954	4.86946	0.0322492	0.414413	737	997	872	508	865	531	979	889	166	620	989	919
	ENSMUSG00000018820.14	Zfyve27	0.17919	5.39751	1.9854	0.165722	0.662338	281	369	267	279	261	257	248	257	44	219	303	250
	ENSMUSG00000018821.4	Avpi1	0.439927	4.71339	8.08394	0.00755608	0.218107	237	248	170	320	233	293	202	181	30	176	211	185
	ENSMUSG00000018822.8	Sfrp5	0.320478	3.08787	2.68369	0.108048	0.599682	50	50	42	58	63	35	48	31	12	22	35	56
	ENSMUSG00000018830.11	Myh11	0.339046	4.99549	4.39302	0.0447456	0.474662	232	251	174	273	227	164	204	170	29	142	163	208
	ENSMUSG00000018841.18	Rad51d	-0.0757215	3.62554	0.298774	0.587233	0.91312	90	113	81	76	67	72	94	91	20	87	85	72
	ENSMUSG00000018844.7	Fndc8	-0.365593	-0.385816	0.384231	0.538336	0.885907	0	2	1	4	2	4	2	3	0	2	3	5
	ENSMUSG00000018845.15	Unc45b	0.496064	4.55263	8.63801	0.00605242	0.193026	145.79	169.72	91.88	197.7	164.12	157.78	145.89	102.44	13	102.74	93	128.76
	ENSMUSG00000018846.9	Pank3	-0.0137157	6.38599	0.0208899	0.885696	1	574	807	650	630	678	547	691	603	107	623	694	724
	ENSMUSG00000018848.5	Rars	-0.0570819	5.841	0.24013	0.626388	0.931721	339	479	373	327	406	389	399	388	92	347	419	400
	ENSMUSG00000018849.7	Wwc1	0.165852	4.28914	1.74763	0.192562	0.662338	163	165	163	215	181	191	172	162	32	142	185	149
	ENSMUSG00000018858.16	Mrpl58	0.101801	4.03893	0.518337	0.475111	0.849417	115	104	100	90	110	105	87	89	19	76	120	118
	ENSMUSG00000018861.9	Fdxr	-0.0640912	2.78362	0.0923411	0.762561	0.992836	41	34	35	35	38	45	33	49	12	27	42	42
	ENSMUSG00000018862.12	Otop3	-0.116612	3.14418	0.575313	0.451936	0.837021	95	109	105	107	97	71	118	88	25	93	103	114
	ENSMUSG00000018865.10	Sult4a1	1.20336	-0.989144	1.74038	0.193471	0.662338	0	1	2	2	3	1	1	0	0	0	2	0
	ENSMUSG00000018868.5	Pnpla5	0.363995	3.69102	2.64159	0.116346	0.604704	103	110	100	127	105	65	83	90	14	91	67	64
	ENSMUSG00000018882.13	Mrpl45	-0.184702	3.90352	2.15147	0.149082	0.662338	103	114	84	100	101	73	100	120	22	102	102	116
	ENSMUSG00000018893.16	Mb	0.838607	8.29265	17.094	0.000527795	0.0515675	3170	2867	1580.67	3497.69	3410.13	2543.5	2099	1583	182	1934	1514	1424
	ENSMUSG00000018899.18	Irf1	-0.0820452	8.60993	0.2856	0.597883	0.919312	1807.53	2479.22	2467.95	1128.2	2229.92	1938.75	2241.4	1859.33	395.6	1548.06	2702.5	2400.24
	ENSMUSG00000018900.8	Slc22a5	0.0187687	3.51659	0.0180519	0.893693	1	65.04	109.56	67.95	78.83	61.23	73	75.47	69.37	15.71	74.47	77.98	72.8
	ENSMUSG00000018906.15	P4ha2	0.219444	3.94424	2.06452	0.157375	0.662338	107	132	70	99	91	113	83	94	18	80	72	108
	ENSMUSG00000018907.11	Alox12e	0.0185384	5.54032	0.0168932	0.89745	1	515	581	428	753	605	314	574	525	91	604	481	455
	ENSMUSG00000018909.16	Arrb1	-0.110143	7.02081	1.49943	0.226851	0.662338	713	1094	692	820	868	621	887	909	155	840	764	913
	ENSMUSG00000018914.6	Il3	0	-1.62443	0	1	1	0	0	0	0	0	0	0	0	0	0	0	0
	ENSMUSG00000018916.6	Csf2	1.2736	-1.11362	2.46735	0.122931	0.618291	2	0	2	1	4	3	2	1	0	0	0	1
	ENSMUSG00000018919.11	Tm4sf5	-1.11117	-0.984409	1.63702	0.207004	0.662338	1	1	1	0	1	0	1	1	1	2	0	3
	ENSMUSG00000018920.12	Cxcl16	-0.41112	6.07226	9.96007	0.00322925	0.13855	274.79	467.51	414	212.53	380.16	286.74	454.67	416.15	87	298.54	564.1	513.26
	ENSMUSG00000018921.12	Pelp1	0.121926	5.23526	1.29056	0.261696	0.662338	242	307	267	226	246	265	276	244	36	212	258	239
	ENSMUSG00000018923.14	Med11	-0.131926	3.90411	0.460454	0.502587	0.864246	115	80	98	63	94	118	95	106	26	90	107	116
	ENSMUSG00000018924.7	Alox15	-1.27116	1.1615	13.178	0.000786114	0.0641229	12	15	3	9	12	8	27	16	2	45	22	12
	ENSMUSG00000018925.4	Heatr9	0.00994159	-0.155135	0.000403864	0.984443	1	6	2	5	4	2	4	2	5	1	2	7	3
	ENSMUSG00000018927.4	Ccl6	-0.526549	6.41424	9.13627	0.00633699	0.19685	389	714	522	325	565	256	739	669	91	633	583	759
	ENSMUSG00000018930.4	Ccl4	0.195873	4.17614	0.396734	0.536165	0.884916	117	153	216	41	140	150	143	114	23	77	157	111
	ENSMUSG00000018931.4	Natd1	-0.136062	4.35558	1.26587	0.266247	0.664691	118	202	179	169	158	105	164	178	31	159	171	177
	ENSMUSG00000018932.10	Map2k3	0.279089	6.61098	8.46794	0.00550439	0.185978	827	854	622	858	844	714	735	674	108	563	729	634
	ENSMUSG00000018965.12	Ywhah	-0.260274	7.07828	5.63348	0.0217531	0.360131	690.83	1040	770.64	582.92	798.86	697.87	919.83	812	186	692.9	1064.87	1031
	ENSMUSG00000018974.8	Sart3	0.094805	5.2339	0.49473	0.485759	0.853618	239	262	215	185	259	227	231	224	45	165	226	234
	ENSMUSG00000018983.10	E2f2	-0.164045	4.91699	1.69312	0.199523	0.662338	156	229	187	163	188	219	229	229	43	151	225	238
	ENSMUSG00000018986.11	Slfn3	-0.161597	3.2563	0.888815	0.350612	0.754995	45.82	64.63	59.82	30	48.51	40.95	54.7	60.73	7	33	74.4	54.79
	ENSMUSG00000018995.13	Nars2	0.0952336	3.3981	0.437798	0.511413	0.8699	72	92.96	64	70	85	62	81	55	12	68	71	75
	ENSMUSG00000018999.15	Slc35b4	-0.228355	5.15619	4.22633	0.0453704	0.477307	198.48	334.53	243.67	191.59	217.03	184.27	274.4	234.1	55.59	247.83	281.73	271.09
	ENSMUSG00000019027.9	Dnah1	0.187052	0.311123	0.175931	0.676801	0.945694	0	9	6	7	8	3	9	3	0	5	4	4
	ENSMUSG00000019039.15	Dalrd3	-0.0254975	4.10625	0.0354895	0.851383	1	123.25	149.85	116.7	115.21	148.69	92.9	118.31	98.54	25.74	109.94	163.67	137.03
	ENSMUSG00000019054.14	Fis1	0.249057	5.4873	5.86642	0.0193361	0.341874	322	351	259	266	348	271	269	268	41	210	266	291
	ENSMUSG00000019055.16	Plod1	-0.167354	5.97719	2.81214	0.100182	0.599682	316	456	330	293	362	322	405	371	69	313	419	459
	ENSMUSG00000019066.14	Rab3d	0.0184945	6.60049	0.033484	0.855594	1	729	1007	955	977	902	715	979	915	160	858	772	844
	ENSMUSG00000019080.9	Mfsd3	0.119324	1.9287	0.241834	0.62517	0.931721	30.77	38.7	17.65	18	21.14	26.69	31.9	23	3.57	25	17.9	20.83
	ENSMUSG00000019082.19	Slc25a22	0.0532793	5.69759	0.190748	0.664299	0.938951	244	363	395	222	335	271	288	282	61	229	384	273
	ENSMUSG00000019087.14	Atp6ap1	-0.197248	6.73443	4.30704	0.0434437	0.470498	620	1041	771	680	760	538	883	851	144	722	867	915
	ENSMUSG00000019088.15	Dnase1l1	-0.239145	4.65403	3.62781	0.0629414	0.528711	134	207	143	130	162	92	169	183	30	129	176	195
	ENSMUSG00000019102.11	Aldh3a1	0.288555	5.2623	5.87582	0.0192448	0.341284	297	343	295	380	313	179	288	260	38	246	209	253
	ENSMUSG00000019122.9	Ccl9	-0.382335	6.13525	6.80117	0.0145237	0.301492	338	630	473	298	476	285	591	579	88	482	459	612
	ENSMUSG00000019124.11	Scrn1	0.37001	2.51877	2.75769	0.103435	0.599682	30	47	28.55	27	32	26	22	31	2	26	20	27
	ENSMUSG00000019132.12	BC005537	-0.357736	8.86801	13.4969	0.000610238	0.0542439	2204	3655	3008	2073	2953	2016	3472	3155	645	2664	3516	4041
	ENSMUSG00000019139.11	Isyna1	-0.194299	3.94505	1.86145	0.178944	0.662338	74	116	81	70	97	94	109	90	24	80	98	120
	ENSMUSG00000019143.16	Hars2	0.0974628	4.26592	0.702853	0.406063	0.796533	144	154	130	136	141	140	138	129.13	25	117	148.13	132.25
	ENSMUSG00000019146.3	Cacng2	-0.174331	-1.47796	0.0245641	0.88419	1	0	0	0	0	2	0	0	0	0	2	0	0
	ENSMUSG00000019158.10	Tmem160	0.362802	3.99927	1.17355	0.291974	0.693896	87	76	60	67	91	93	65	67	16	43	64	64
	ENSMUSG00000019173.12	Rab5c	-0.296204	7.83729	7.56259	0.00842843	0.231328	935	1743	1535	970	1538	945	1664	1546	288	1293	1701	1585
	ENSMUSG00000019178.18	Styxl1	-0.164394	-1.2941	0.0263149	0.871828	1	0	0	0	1	1	1	0	0	0	2	1	0
	ENSMUSG00000019179.11	Mdh2	0.145421	6.50356	1.73159	0.19458	0.662338	665	778	520	708	749	721	657	644	102	578	688	648
	ENSMUSG00000019188.17	H13	-0.0423764	6.64367	0.208069	0.650382	0.932299	543	755	602	539	615	540	636	639	120	500	705	599
[truncated: 32,668 more rows]

## Sheet: b DEGs n=340
DEGs from a n=340 (q<0.05 filter applied)	ensembl_ID	GeneID	logFC	logCPM	F	PValue	FDR	6JMito	6JMito	6JMito	6JMito	6JMito	6JMito	6J	6J	6J	6J	6J	6J
	ENSMUSG00000000093.7	Tbx2	0.769851	2.91778	16.207	0.000205056	0.0300818	50	56	40	78	45	39	42	29	3	29	30	26
	ENSMUSG00000000290.14	Itgb2	-0.697604	7.76157	25.3348	2.40208e-05	0.0082371	803	1478	1138	481	1217	720	1599	1472	308	1072	1669	1915
	ENSMUSG00000000594.8	Gm2a	-0.414696	6.56613	15.1206	0.000315315	0.0380872	410	784	626	488	640	363	779	674	150	592	778	758
	ENSMUSG00000001270.10	Ckb	-0.614162	5.76497	23.1211	2.03034e-05	0.00724726	221.89	330.5	199.83	230.73	274.92	159	335.78	362.96	81.9	248.87	354.67	442.95
	ENSMUSG00000001588.13	Acap1	-0.6909	3.83985	20.7384	3.72343e-05	0.0110926	68	77	64	50	66	54	88	109	31	78	104	102
	ENSMUSG00000002033.15	Cd3g	-1.04185	2.28724	16.8538	0.000169806	0.0268797	11	46	15	10	26	13	53	43	11	22	34	45
	ENSMUSG00000002603.16	Tgfb1	-0.400454	6.46064	14.074	0.000481416	0.0498186	375	601	460	335	506	354	570	572	125	407	654	615
	ENSMUSG00000002699.14	Lcp2	-0.661892	6.24413	21.2901	7.58698e-05	0.0165385	312	538	430	190	467	308	638	585	119	398	619	669
	ENSMUSG00000003476.17	Crhr2	0.911719	3.03904	18.5307	9.49403e-05	0.0185949	71	84	44	65	77	47	47	44	4	32	24	28
	ENSMUSG00000003477.6	Inmt	1.62173	2.00738	26.1559	8.4504e-06	0.00390074	48	27	16	48	26	11	12	12	0	8	7	11
	ENSMUSG00000003665.8	Has1	0.804937	3.88454	29.0396	2.22492e-06	0.00190222	125	97	107	100	124	117	78	53	10	64	79	55
	ENSMUSG00000004707.15	Ly9	-0.815054	4.46062	33.2259	6.08082e-07	0.000878349	98	118	110	49	119	70	160	161	36	111	183	198
	ENSMUSG00000004730.16	Adgre1	-0.858932	6.74432	42.0817	2.63181e-07	0.000559695	400	755	480	315	517	271	821	775	160	552	831	1064
	ENSMUSG00000005338.15	Cadm3	0.623884	6.0051	19.1432	0.000132932	0.0224798	435.69	583.34	506.53	378	531.27	389	360	295.93	45.62	254.93	385	272.81
	ENSMUSG00000006219.13	Fblim1	-0.537515	4.28117	14.1267	0.000471164	0.0491737	78	117	89	55	89	76	127	115	22	89	129	153
	ENSMUSG00000006542.14	Prkag3	1.07708	1.86028	14.1399	0.000468625	0.049081	29	32	14	40	35	21	18	16	2	12	7	15
	ENSMUSG00000008496.20	Pou2f2	-0.659131	4.82044	16.9962	0.000239544	0.033485	107	201	170	68	116	88	183	180	47	125	216	246
	ENSMUSG00000013483.15	Card14	0.555881	5.67108	20.0915	5.29705e-05	0.0134038	534.96	457.58	397.79	402.61	486.89	431.94	416.25	270.99	58.66	244.95	385.58	246.52
	ENSMUSG00000015314.11	Slamf6	-1.0867	3.10254	32.2261	8.234e-07	0.00109788	28	56	38	19	44	25	78	65	20	45	87	80
	ENSMUSG00000015354.9	Pcolce2	0.637831	4.99618	27.7297	3.39186e-06	0.0023056	238	278	168	267	214	190	169	133	26	145	138	146
	ENSMUSG00000015714.12	Cers2	-0.466839	6.32822	14.9399	0.00038417	0.0432403	302	583	461	307	454	273	567	479	101	449	592	627
	ENSMUSG00000016087.14	Fli1	-0.514942	5.08987	19.2065	6.52974e-05	0.0152475	133	224	187	123	188	109	249	232	31	184	231	281
	ENSMUSG00000017969.14	Ptgis	0.482651	4.93278	19.0579	6.90099e-05	0.0157393	173.93	233	171	200	198	148	159	112	26	118	134	146
	ENSMUSG00000018168.9	Ikzf3	-0.547312	4.18987	15.122	0.000315136	0.0380872	82	133	82	46	84	72	130	105	25	93	123	148
	ENSMUSG00000018334.19	Ksr1	0.485593	5.68657	17.9138	0.000106126	0.0198869	360	437	286	430	433	290	329	266	41	245	258	263
	ENSMUSG00000019278.6	Dpep1	0.788339	3.96606	26.4961	5.08257e-06	0.00293593	139	102	105	115	138	88	97	55	10	76	48	63
	ENSMUSG00000019838.12	Slc16a10	-0.629937	5.06163	25.5763	6.9048e-06	0.00357267	144	252	160	161	185	116	229	253	48	184	291	350
	ENSMUSG00000019899.18	Lama2	0.587424	6.64489	28.7838	2.41434e-06	0.00190222	841.25	846	491	820	756	531.52	536	526	83	425	406	514
	ENSMUSG00000019997.12	Ccn2	0.603649	7.46689	30.5949	1.36218e-06	0.00134922	1232.96	1124.3	852.62	1112.24	1221.08	735.89	888.62	580.05	102.7	726.62	691.17	678.55
	ENSMUSG00000020021.5	Fgd6	-0.485162	5.98372	21.7625	2.57808e-05	0.00843152	309	495	404	289	398	238	544	473	91	365	517	583
	ENSMUSG00000020101.15	Vsir	-0.447209	6.8056	15.1848	0.000319476	0.0382453	550	777	483	372	604	415	683	646	163	582	761	823
	ENSMUSG00000020143.16	Dock2	-0.641224	7.38266	28.1046	5.13044e-06	0.00293593	648.36	1134	903	431	895	531	1247	1097	225	825	1257.05	1394
	ENSMUSG00000020189.16	Osbpl8	-0.474108	7.0372	20.6579	3.83367e-05	0.0111682	608	965	817	519	796	545	917	935	198	729	996	1262
	ENSMUSG00000020218.12	Wif1	0.514092	4.51832	14.4535	0.000412516	0.0451278	172	178	90	167	153	125	104	101	19	95	100	119
	ENSMUSG00000020261.16	Slc36a1	-0.404043	6.04443	17.7125	0.000114575	0.0207957	344	509	465	398	439	288	568	506	111	469	515.87	586.92
	ENSMUSG00000020340.17	Cyfip2	-0.544214	5.95738	21.8286	2.51823e-05	0.00831423	247	465	394	236	321	216	455	437	100	341	443	531
	ENSMUSG00000020399.15	Havcr2	-0.695919	4.36329	24.8384	8.85586e-06	0.00390074	72	119	88	58	89	56	132	107	27	107	143	150
	ENSMUSG00000020493.9	Prr11	-0.644826	3.59745	17.2618	0.00013616	0.0226936	52	99	80	60	93	49	100	104	26	104	99	137
	ENSMUSG00000020573.18	Pik3cg	-0.463203	5.28092	14.1577	0.000465246	0.0488748	215	314	227	130	241	159	318	269	68	238	292	305
	ENSMUSG00000020681.15	Ace	0.427945	6.00729	15.357	0.000286909	0.0366704	404.97	587	491	455	476.98	299	390	340	54	299	338	336
	ENSMUSG00000020810.6	Cygb	0.450449	5.62586	15.845	0.000236432	0.0332944	340.86	412.93	269	327.85	359.84	233.9	270	232	48	223.93	215.97	227
	ENSMUSG00000021038.18	Vipas39	-0.403	5.1144	14.3865	0.000423882	0.0459371	162	272	239	154	201	159	242	241	53	224	297	285
	ENSMUSG00000021061.16	Sptb	0.678434	6.60608	24.6328	2.46209e-05	0.0082371	754	720	396	790	700	586	556	418	65	384	347	418
	ENSMUSG00000021190.15	Lgmn	-0.54255	8.55433	16.8846	0.000263718	0.0352818	1617	2183	1705	1040	2127	1418	2364	2483	448	1683	2635	3137
	ENSMUSG00000021319.8	Sfrp4	0.71643	4.91901	25.743	8.67317e-06	0.00390074	248	302	212	252	327	205	164	132	33	148	187	141
	ENSMUSG00000021423.7	Ly86	-0.52357	5.26319	15.1627	0.000360739	0.0416858	177	269	248	133	269	138	302	233	57	240	342	345
	ENSMUSG00000021903.12	Galnt15	0.619151	7.01327	35.114	3.46763e-07	0.000667847	1061	1035	812	1006	972	915	796	557	92	645	629	671
	ENSMUSG00000021939.9	Ctsb	-0.613362	10.2131	28.1157	3.15268e-06	0.00226183	5097.28	8272.29	6138.07	3627.54	6678.54	4092.3	8411.6	8533.73	1733.61	5981.84	8786.72	10467.4
	ENSMUSG00000021998.17	Lcp1	-0.590515	8.57383	22.8603	2.85693e-05	0.00917048	1580.97	2672.15	2028.89	925.52	2148.95	1530.95	2794.97	2615.88	545	1842.95	3076.97	3079.79
	ENSMUSG00000022032.15	Scara5	0.589469	5.92865	33.7927	5.12976e-07	0.000846825	467	512	381	480	403	390	278	315	55	260	282	334
	ENSMUSG00000022148.17	Fyb	-0.767636	6.50615	31.5388	3.78228e-06	0.00247397	342.98	582.07	395.46	214.41	449.14	313.96	633.95	592.13	147.22	399.92	695.73	817.44
	ENSMUSG00000022180.8	Slc7a8	-0.737761	6.55597	18.0985	0.000328673	0.039021	288	622	508	181	458	253	664	629	118	433	641	797
	ENSMUSG00000022305.14	Lrp12	-0.437758	4.9133	15.2877	0.000294944	0.0369128	127	213	179	128	192	126	210	232	46	169	229	227
	ENSMUSG00000022372.15	Sla	-0.51092	5.09446	15.8914	0.000232147	0.0331053	145	253	145	98	161	120	229	171	46	167	259	243
	ENSMUSG00000022425.17	Enpp2	0.394276	6.0034	15.3588	0.000286708	0.0366704	526	566.45	424	511	520.97	389	426	346	55	397	414.93	333.85
	ENSMUSG00000022439.10	Parvg	-1.05004	4.03474	41.2578	6.09977e-08	0.000312262	43	80	60	27	62	31	90	102	22	69	110	141
	ENSMUSG00000022488.10	Nckap1l	-0.786821	7.38922	30.3144	7.69715e-06	0.00379352	568	1129	982	445	883	527	1352	1164	258	920	1413	1528
	ENSMUSG00000022504.11	Ciita	-0.577842	6.15387	19.153	0.000107965	0.0200151	261	515	469	195	432	309	543	456	118	420	616	595
	ENSMUSG00000022548.15	Apod	0.57088	8.93316	29.0438	2.22194e-06	0.00190222	3669	4951	3732	3109	4362	3138	3156	2488	456	2098	2957	2320
	ENSMUSG00000022610.11	Mapk12	0.579176	4.38533	15.7815	0.000242436	0.0336407	177	176	100	178	162	133	140	111	11	93	94	103
	ENSMUSG00000022667.19	Cd200r1	-0.77614	3.97174	16.887	0.000256547	0.0346058	57	113	93	29	82	57	115	104	30	99	141	131
	ENSMUSG00000022696.18	Sidt1	-0.808228	2.38071	14.7227	0.000369966	0.042469	17	41	23	10	27	19	52	42	6	33	32	42
	ENSMUSG00000022788.17	Fgd4	-0.48397	5.63143	15.4876	0.000285443	0.0366704	241	446	290	283	320	186	406	392	77	350	367	513
	ENSMUSG00000022951.17	Rcan1	0.388735	6.25643	15.3187	0.000291326	0.0368157	671	673	522	552	632	499	516	469	73	407	519	408
	ENSMUSG00000022969.14	Il10rb	-0.629006	5.58231	21.9364	3.76392e-05	0.0110926	218	364	297	158	246	193	362	401	80	277	425	394
	ENSMUSG00000023019.13	Gpd1	0.664551	4.58948	19.1818	8.27741e-05	0.0173911	214	212	167	248	151.8	109	152.97	115.86	20	111.91	93	112
	ENSMUSG00000023046.7	Igfbp6	0.775369	5.65796	35.276	5.47101e-07	0.000862106	408	457	252	388	352	279	230	180	30	192	257	210
	ENSMUSG00000023913.18	Pla2g7	-1.01794	5.71788	19.9336	0.000248911	0.0341007	162.27	294.91	248	105.93	261	157.92	337.94	357.79	87	245.93	520.67	568.83
	ENSMUSG00000024011.18	Pi16	0.598137	7.24765	22.6757	3.2978e-05	0.0100503	1302.17	1327.23	916.74	1074.7	1220.43	825.37	907.76	676.67	117	708.87	819.38	650.51
	ENSMUSG00000024013.16	Fgd2	-0.683815	5.24967	21.8665	4.14127e-05	0.0115779	123	210	172	91	173	110	227	198	56	185	242	278
	ENSMUSG00000024030.8	Abcg1	-0.600528	6.94583	22.2527	3.94831e-05	0.011299	469	862	784	346	757	441	951	897	175	736	951	1022
	ENSMUSG00000024052.18	Lpin2	-0.412666	5.68631	15.3499	0.000287719	0.0366704	246	356	278	181	287	214	353	325	71	275	358	396
	ENSMUSG00000024063.14	Lbh	-0.620188	5.9297	28.8481	2.36521e-06	0.00190222	223	443	284	203	295	152	428	391	77	335	377	474
	ENSMUSG00000024210.4	Ip6k3	0.676999	3.38102	15.3206	0.0002911	0.0368157	87	97	35	78	90	62	61	52	10	39	41	38
	ENSMUSG00000024300.18	Myo1f	-0.771748	6.52792	31.0303	4.75275e-06	0.00292261	320	540	444	206	466	366	641	570	134	437	816	836
	ENSMUSG00000024481.6	Lvrn	1.17214	2.66162	36.9921	2.01e-07	0.000536006	48	52	48	45	65	57	26	19	4	20	22	31
	ENSMUSG00000024672.12	Ms4a7	-0.922786	5.38984	28.6878	1.55468e-05	0.00605572	139	307	189	98	206	146	353	327	69	233	306	456
	ENSMUSG00000024730.8	Ms4a8a	-0.87477	3.67996	17.5698	0.0002226	0.0320202	45	69	82	27	70	38	113	83	18	78	114	120
	ENSMUSG00000024781.17	Lipa	-0.79764	5.66068	43.7646	3.11205e-08	0.000312262	201	376	245	206	249	152	413	399	85	311	386	506
	ENSMUSG00000024818.16	Slc25a45	-0.710342	3.82605	19.3445	6.20384e-05	0.0146704	39	104	84	40	57	54	115	73	24	78	115	120
	ENSMUSG00000024892.18	Pcx	0.513281	4.63707	18.1071	9.86208e-05	0.0190736	219	259	178	248	187	141	169	157	23	131	130	143
	ENSMUSG00000024910.6	Ctsw	-0.778848	3.12682	16.0046	0.000222021	0.0320202	41	49	39	28	32	36	62	64	9	54	68	83
	ENSMUSG00000024965.10	Fermt3	-0.630214	6.41917	27.7919	4.25589e-06	0.0027322	351	507	413	221	435	262	560	549	114	433	555	672
	ENSMUSG00000024998.18	Plce1	0.497324	5.32796	19.1704	6.618e-05	0.0152951	296	299	185	282	256	209	207	173	25	193	179	177
	ENSMUSG00000025192.14	Entpd7	-0.443211	5.24568	15.274	0.000296561	0.0369816	157.7	259.09	262.96	160.61	222.47	145	286.93	273.51	58	179.79	294.53	311.69
	ENSMUSG00000025232.9	Hexa	-0.453631	5.60978	17.2676	0.000135854	0.0226936	239.94	341.94	232.95	240	254.88	184	326.89	305.96	74.95	288.97	331.91	404.85
	ENSMUSG00000025314.17	Ptprj	-0.39058	7.77756	14.1069	0.000474978	0.0492996	939	1539	1290	734	1286	878	1560	1437	252	1104	1545	1696
	ENSMUSG00000025473.17	Adam8	-0.69835	6.73487	30.6375	2.91646e-06	0.00215116	406	642	510	243	498	330	749	588	157	503	777	817
	ENSMUSG00000025479.10	Cyp2e1	1.2096	1.94189	24.0507	1.15867e-05	0.00489847	35	53	38	82	34.59	29	18	20	2	25	15	22
	ENSMUSG00000025743.15	Sdc3	-0.670774	8.98632	25.7458	1.62071e-05	0.00624279	1519	3080	2563	1181	2411	1309	3089	3152	669	2265	3212	3639
	ENSMUSG00000025810.10	Nrp1	-0.529059	7.11053	20.9654	3.91337e-05	0.011299	573	1026	696	514	767	439	896	876	185	739	942	1284
	ENSMUSG00000026012.3	Cd28	-0.942486	3.13391	24.5056	9.91689e-06	0.00429736	34	66	36	16	45	25	68	64	18	49	81	78
	ENSMUSG00000026085.12	Lyg1	2.72656	-0.371515	20.8585	5.06312e-05	0.0130017	3	21	5	4	18.96	8	3	0	0	2	1	1
	ENSMUSG00000026177.12	Slc11a1	-0.968902	5.91766	23.5581	9.07012e-05	0.0182569	185	320	296	152	279	154	402	396	98	285	466	650
	ENSMUSG00000026208.10	Des	0.518664	9.68692	16.6002	0.000250353	0.0341007	6425	6620	4328	5010	6485	6077	4960	4233	765	3224	4277	3960
	ENSMUSG00000026288.15	Inpp5d	-0.679983	7.23218	36.2281	2.60629e-07	0.000559695	540	953	698	377	724	420	954	903	204	734	1057	1152
	ENSMUSG00000026321.9	Tnfrsf11a	-0.564921	6.37833	18.2173	0.000154168	0.0249746	259	524	426	282	405	291	507	558	103	443	543	610
	ENSMUSG00000026482.14	Rgl1	-0.434611	7.52948	15.7798	0.000242599	0.0336407	764	1272	1068	566	1052	685	1222	1224	237	866	1345	1348
	ENSMUSG00000026489.14	Coq8a	0.679693	6.73741	17.6251	0.000339301	0.0400086	945.19	888.49	527.06	862.17	1071.58	786.55	711.35	544.57	70.69	475.25	546.71	506.94
	ENSMUSG00000026670.16	Uap1	0.687942	6.72241	40.5142	7.47632e-08	0.000312262	847	862	840	650	996	858	651	504	81	424	654	493
	ENSMUSG00000026674.10	Ddr2	0.35763	7.69475	14.5504	0.00039663	0.0439296	1475	1777	1366	1330	1560	1311	1238	1096	208	1154	1142	1149
	ENSMUSG00000026697.11	Myoc	0.76096	7.65657	44.2352	3.66989e-08	0.000312262	1682	2399	1216	1765	1604	1207	1028	927	175	989	976	908
	ENSMUSG00000026786.15	Apbb1ip	-0.726157	6.21393	26.1871	1.76072e-05	0.00663468	252	587	383	224	435	233	556	556	116	435	600	674
	ENSMUSG00000026872.19	Zeb2	-0.458561	8.95749	16.8152	0.000161778	0.0259646	2150.72	3840.77	3238.8	1657.37	2904.08	1797.84	3620.09	3256.37	666.29	2711.39	3842.45	4221.37
	ENSMUSG00000026879.15	Gsn	0.518683	10.4446	19.0941	7.67468e-05	0.0165385	12673	12826	8201	13167	11400	8337	9704	7035	1238	8953	7180	6998
	ENSMUSG00000027339.16	Rassf2	-0.495968	6.8381	17.4025	0.000151599	0.0246737	485	752	525	307	601	359	683	655	148	464	772	894
	ENSMUSG00000027381.17	Bcl2l11	-0.484795	5.72124	16.1996	0.000205654	0.0300818	226	396	315	175	327	229	386	364	80	280	413	466
	ENSMUSG00000027386.10	Fbln7	0.96765	3.06065	16.0432	0.000355566	0.0415031	85	83	47	103	48	51	30	25	14	44	43	22
	ENSMUSG00000027423.16	Snx5	-0.418671	7.56148	14.3005	0.00043895	0.0466781	838	1285	1012.93	639.91	1205.9	821	1264	1219	250	980	1336.94	1606.88
	ENSMUSG00000027435.9	Cd93	-0.395464	6.89029	15.3776	0.000284567	0.0366704	533	843	620	480	685	496	826	828	157	567	805	943
	ENSMUSG00000027488.13	Snta1	0.576133	4.66891	15.305	0.000331684	0.039244	221	212	121	233	184	153	167	115	17	126	115	127
	ENSMUSG00000027624.21	Epb41l1	-0.404368	6.61889	15.3975	0.000282322	0.0366704	447	623	464	397	499	305	635	618	113	470	540	736
	ENSMUSG00000027698.15	Nceh1	-0.644628	5.79796	25.3892	1.05383e-05	0.00451025	224	387	288	170	330	186	415	430	69	305	397	525
	ENSMUSG00000027999.16	Pla2g12a	0.765081	4.07192	31.0505	1.18218e-06	0.00129972	146	142	103	155	174	146	101	90	13	78	77	90
	ENSMUSG00000028071.13	Sh2d2a	-0.797609	3.82777	18.442	0.000109194	0.0201352	48	83	54	19	50	43	105	84	23	49	79	96
	ENSMUSG00000028249.16	Sdcbp	-0.500956	8.16406	16.6669	0.000233008	0.0331053	1254	2303	1821	1016	1916	1241	2229	2144	430	1629	2416	2699
	ENSMUSG00000028327.15	Stra6l	-1.46015	3.20709	46.7512	2.44845e-08	0.000312262	18	39	30	12	34	19	57	61	12	39	100	94
	ENSMUSG00000028337.15	Coro2a	-0.78789	6.60441	24.7692	4.33574e-05	0.0117428	335.67	581.96	502	213.95	536.79	280.78	674.64	639.65	171.87	464.98	766.83	774.61
	ENSMUSG00000028469.16	Npr2	0.484445	4.95454	17.6628	0.00011677	0.0208614	213	267	158	195.22	229	179	166	124.31	22	159	157	146
	ENSMUSG00000028476.14	Reck	0.470013	4.7789	14.2725	0.000443977	0.0469404	185	193	144	211	188	136	122	151	18	116	123	141
	ENSMUSG00000028494.13	Plin2	-0.608995	8.09156	17.2738	0.000308934	0.0378439	973	1487	1357	761	1360	933	1597	1687	382	1178	2043	1959.96
	ENSMUSG00000028581.18	Laptm5	-0.617886	7.79106	21.0434	7.44618e-05	0.0165385	697	1586	1277	686	1204	678	1677	1502	272	1224	1627	1760
	ENSMUSG00000028656.15	Cap1	-0.397049	8.27885	14.0504	0.00048608	0.0498644	1369.88	2588.81	2016.96	1351.99	1973.92	1316.79	2337.78	2185.85	478.82	1774.93	2559.9	2460
	ENSMUSG00000028657.15	Ppt1	-0.474011	6.18648	17.73	0.000113815	0.0207664	375.12	643.19	459.04	282.01	492.08	284.21	554.22	571.15	112.18	460.07	611.1	685
	ENSMUSG00000028756.13	Pink1	0.54859	6.87751	22.4582	2.34535e-05	0.00813064	1034	1088	768	1170	992	742	827	735	106	666	590	567
	ENSMUSG00000028862.7	Map3k6	0.626018	5.04877	25.0946	8.12003e-06	0.00390074	278	282	249	269	281	255	218	158	30	171	180	162
	ENSMUSG00000028931.13	Kcnab2	-0.561787	4.9574	17.8939	0.000106931	0.01993	127	196	127	86	143	91	199	183	37	132	207	215
	ENSMUSG00000029470.16	P2rx4	-0.470112	6.18345	19.0856	6.83015e-05	0.0156809	362	501	427	259	434	278	490	507	115	349	611	581
	ENSMUSG00000029771.13	Irf5	-0.532376	6.81651	20.7292	4.29923e-05	0.0117355	376.37	692.34	603.77	318.58	641.9	386.47	788.89	722	133.8	481.53	766.61	869.52
	ENSMUSG00000029778.13	Adcyap1r1	0.593314	4.12645	17.7672	0.000112213	0.0205825	138	110	123	120	114	74	86	77	13	70	73	74
	ENSMUSG00000029925.14	Tbxas1	-0.53449	5.49313	16.7772	0.000188679	0.0284887	155	298	257	103	257	146	318	285	47	227	304	343
	ENSMUSG00000029994.18	Anxa4	-0.366298	6.77135	14.3703	0.000426681	0.0459371	469	829	693	457	716	439	759	745	138	643	824	889
	ENSMUSG00000030047.15	Arhgap25	-0.558101	4.86589	18.222	9.44275e-05	0.0185949	123	183	122	84	170	103	163	198	48	131	198	231
	ENSMUSG00000030091.18	Nup210	-0.451709	5.38566	17.0099	0.000150036	0.0245345	165	284	180	126	224	146	264	254	39	217	289	272
	ENSMUSG00000030148.16	Clec4a2	-1.00176	4.51075	20.5115	0.000174153	0.0273184	72	181	132	54	142.99	58	250.99	201	36	163	225.98	216
	ENSMUSG00000030306.15	Tmtc1	0.554656	5.06867	19.6838	5.47275e-05	0.0134745	233	274	172	305	275	221	194	163	20	181	154	183
	ENSMUSG00000030427.18	Lilra6	-0.948751	3.51862	20.4466	8.20025e-05	0.017334	38.28	94.49	72.8	26.75	44.65	39.58	87.99	82.93	16.54	72.29	127.16	141.33
	ENSMUSG00000030786.19	Itgam	-0.820886	7.63528	35.5722	1.76156e-06	0.00160705	798	1307	1026.13	468	964.6	565	1567.41	1423.16	292.2	1051	1581	1791
	ENSMUSG00000030789.10	Itgax	-0.730543	4.39268	32.8855	6.73887e-07	0.000934466	95.64	139.94	107.94	60.96	101.96	84	172.97	133.97	31	140.97	169	197
	ENSMUSG00000031101.7	Sash3	-0.7818	4.73217	31.1821	1.13494e-06	0.00129972	106	194	132	61	123	75	191	172	44	140	220	233
	ENSMUSG00000031389.18	Arhgap4	-0.755016	5.08299	25.5484	1.31893e-05	0.00544324	123.46	223.03	131.57	81.92	138.56	91.52	226.7	232.04	42.48	153.48	221.84	260.22
	ENSMUSG00000031438.12	Rnf128	-0.893011	2.6856	17.6685	0.000116515	0.0208614	19	51	25	17	32	21	41	51	13	41	30	81
	ENSMUSG00000031506.12	Ptpn7	-0.63138	4.48446	18.7637	7.70229e-05	0.0165385	82	175	102	54	114	68	158	135	32	114	158	181
	ENSMUSG00000031557.17	Plekha2	-0.475205	6.18941	19.1968	6.55342e-05	0.0152475	334.46	565.09	409.3	239.01	421.44	280.7	583.09	478.9	99	401.94	569.67	542.56
	ENSMUSG00000031565.19	Fgfr1	0.407665	7.61465	16.6003	0.000175859	0.0273642	1503	1481	1035	1245	1431	1113	1091	941	160	1002	1010.96	990
	ENSMUSG00000031591.15	Asah1	-0.597531	6.14756	17.8601	0.000209972	0.0304565	306	620	435	308	478	238	556	551	124	487	599	706
	ENSMUSG00000031633.5	Slc25a4	0.675841	7.3943	20.6475	0.000117449	0.0208614	1433	1419	767	1448	1601	1313	1076	808	108	799	879	863
	ENSMUSG00000031659.14	Adcy7	-0.420546	6.35901	18.3137	9.12146e-05	0.0182569	385	624	373	332	410	282	534	515	100	415	558	635
	ENSMUSG00000031709.16	Tbc1d9	-0.472136	5.92078	17.293	0.000134535	0.0226405	256.27	424.86	355.09	278.64	347.35	304.54	496	398.77	99.56	311.99	485.01	543.03
	ENSMUSG00000031740.9	Mmp2	0.505502	7.68619	26.3978	5.25075e-06	0.00293593	1509	1832	1214	1730	1702	1280	1137	1095	192	1066	1051	1148
	ENSMUSG00000031827.14	Cotl1	-0.675035	7.03355	38.0519	1.48595e-07	0.000429278	392	853	606	385	615	402	835	918	152	638	914	1000
	ENSMUSG00000031875.8	Cmtm3	-0.504516	5.08868	17.9195	0.000105896	0.0198869	153	229	180	125	192	109	224	188	55	176	266	271
	ENSMUSG00000032122.16	Slc37a2	-0.655734	6.16423	39.9251	8.79519e-08	0.000312262	334	570	422	294	390	299.69	563	618	123	451	611	731
	ENSMUSG00000032359.15	Ctsh	-0.747415	6.46031	32.4814	2.31329e-06	0.00190222	327	637	504	308	527	270	666	679	159	538	715	841
	ENSMUSG00000032372.15	Plscr2	1.02436	2.12387	14.8214	0.000357478	0.0415377	43	30	28	26	46	32	22	12	3	12	24	15
	ENSMUSG00000032845.17	Alpk2	0.712093	4.89981	16.0372	0.000472347	0.0491737	320	301	191.57	322	259.86	201	236.13	174	26	127	180.91	114.74
	ENSMUSG00000033022.9	Cdo1	0.64396	3.31309	16.3173	0.000196389	0.0293458	89	85	93	127	81	67	70	48	12	63	49	59
	ENSMUSG00000033031.14	Cip2a	-0.528939	4.02061	14.6588	0.000379636	0.0431503	81	140	97	97	110	78	129	148	34	109	153	163
	ENSMUSG00000033327.19	Tnxb	0.631472	9.54291	31.9218	9.03713e-07	0.00116033	6003	5942.92	4259	5054	5375	4452	3694	3380.16	575	3078	3481	3502
	ENSMUSG00000033685.14	Ucp2	-0.54546	8.15844	18.7564	0.000121331	0.0212433	1032	1967.65	1614.73	942.74	1572.64	804.26	2077.77	1751.32	341.97	1502.44	2067.67	2183.74
	ENSMUSG00000033765.6	Calm4	0.490445	9.17491	15.3816	0.000382826	0.0432294	6407	7361	5704.98	8642.96	7637	9429	6040	5488	1015	4998	5614	5322
	ENSMUSG00000033863.3	Klf9	0.50392	6.84117	18.7529	8.72074e-05	0.0179946	877	997	627	926	1011	567	766	562	91	606	498	571
	ENSMUSG00000034028.17	Cd226	-0.854015	2.19413	14.3578	0.000428857	0.0459794	19	27	17	22	23	9	40	28	8	19	42	45
	ENSMUSG00000034330.11	Plcg2	-0.429548	5.99567	15.8582	0.000235205	0.033281	323	445	386	251	358	268	452	442	96	338	487	522
	ENSMUSG00000034438.17	Gbp8	-0.95647	5.47919	22.7062	0.00010564	0.0198869	103.33	236.95	243.51	77.14	239.02	152.37	305.35	276.52	58.36	267.1	392.99	467.89
	ENSMUSG00000034463.5	Scara3	0.503826	6.58305	19.7048	5.4307e-05	0.0134745	654	823	477	684	620	503	478	423	67	463	423	475
	ENSMUSG00000034612.8	Chst11	-0.521835	4.71713	18.5184	8.44446e-05	0.0176352	115	202	115	89	157	86	178	181	34	164	191	184
	ENSMUSG00000034613.13	Ppm1h	-0.662243	6.02897	17.6119	0.000286376	0.0366704	248	417	327.39	130	311	247	457	362.01	103	309.26	508.24	497.68
	ENSMUSG00000034641.3	Cd300ld	-1.00887	4.35618	34.77	1.22262e-06	0.00129972	52.41	145	79.12	50.7	108.35	63.14	165.86	176.23	24	130.24	158.36	211.44
	ENSMUSG00000034707.8	Gns	-0.401835	8.03585	16.7137	0.000168276	0.0267598	1116	1896	1464	1088	1461	975	1776	1688	346	1339	1797	2063
	ENSMUSG00000034842.17	Art3	0.597292	5.35438	23.3279	1.48703e-05	0.00592537	312.05	385.06	328.07	282.01	367.03	280.04	271	222.05	32	193.03	228.07	191.06
	ENSMUSG00000034926.4	Dhcr24	0.429534	8.42235	14.4166	0.0004316	0.0460377	2619	2606	2170	2740	2125	1854	1815	2013	287	1788	1648	1718
	ENSMUSG00000034947.14	Tmem106a	-0.56898	6.58253	17.0504	0.000271087	0.035733	367	704	592	270	547	359	723	675	149	466	742	800
	ENSMUSG00000035004.4	Igsf6	-0.691722	4.63281	22.6142	2.25686e-05	0.0079029	91	208	138	94	136	101	213	171	52	135	247	218
	ENSMUSG00000035392.18	Dennd1a	-0.48661	6.83017	15.109	0.000424248	0.0459371	502	875	755	381	760	462	835	807	196	653	908	972
	ENSMUSG00000035493.11	Tgfbi	-0.491922	9.40875	19.3372	6.22076e-05	0.0146704	3092	5622	4258	2307	4460	2688	5308	4952	1089	4025	5594	5458
	ENSMUSG00000035923.5	Myf6	0.669137	4.20421	15.1343	0.000426266	0.0459371	162	118	98	176	148	137	122	79	11	71	102	89
	ENSMUSG00000035960.15	Apex1	0.486759	4.71325	14.2717	0.000444124	0.0469404	225.02	242.53	153.05	167.85	234.98	240	140.33	154.54	19.97	141.34	173.56	171.49
	ENSMUSG00000036086.17	Zranb3	-0.609544	3.47743	15.6954	0.000250834	0.0341007	49.61	78	62	37.72	54	45.87	73	74.3	24.21	78	76.89	90.32
	ENSMUSG00000036278.8	Macrod1	0.719472	3.5722	26.5365	5.01517e-06	0.00293593	102	115	77	99	94	67	65	46	14	51	55	56
	ENSMUSG00000036526.9	Card11	-0.752213	3.71915	18.386	8.87611e-05	0.0179946	49	73	49	28	51	54	86	81	21	55	100	95
	ENSMUSG00000036594.16	H2-Aa	-0.568696	7.60151	25.6872	7.0803e-06	0.0036096	929	1591	1149	723	1494	677	1629	1381	298	1450	1685	1817
	ENSMUSG00000036887.6	C1qa	-0.508189	6.76391	18.4942	9.96972e-05	0.019095	492	724	488	460	528	309	770	674	127	578	681	846
	ENSMUSG00000036905.9	C1qb	-0.492223	7.47501	19.6309	5.58051e-05	0.0134745	809	1163	780	661	950	533	1242	1139	181	924	1159	1370
	ENSMUSG00000037071.4	Scd1	0.534303	10.224	16.8762	0.00023722	0.0332944	11318	10783.4	9726.37	11272	8637.79	5779.84	7466.79	7423.02	1062.26	7808.06	5531.19	5665.04
	ENSMUSG00000037318.11	Traf3ip3	-0.623759	3.15081	14.8025	0.000358259	0.0415377	37.45	49.87	37.19	30.94	39	27.22	62.89	57.02	7	57.14	57.64	56.84
	ENSMUSG00000037362.9	Ccn3	0.703143	5.09916	35.9138	2.74463e-07	0.000559695	248	310	232	309	271	284	209	179	24	188	156	142
	ENSMUSG00000037710.9	Cisd1	0.537004	4.43635	14.205	0.000456357	0.0480867	201	168	139	175	190	183	134	136	15	122	123	120
	ENSMUSG00000037759.7	Ptger2	-0.963327	2.3712	15.5298	0.000267857	0.0355194	16	37.96	14	6	19.74	22.45	25	30	8.46	46	33.13	49
	ENSMUSG00000037852.9	Cpe	0.526884	5.86073	20.2366	4.46853e-05	0.0118252	526	568	358	582	514	397	394	303	51	344	340	375
	ENSMUSG00000037860.16	Aim2	-0.557201	3.59751	14.0355	0.000489051	0.0498645	56	80	64	43	67	48	90	58	21	71	105	104
	ENSMUSG00000037902.19	Sirpa	-0.689679	8.225	39.839	9.00746e-08	0.000312262	1131	1919	1455	858	1539	982	2071	2039	414	1532	2244	2524
	ENSMUSG00000038011.16	Dnah10	1.04944	1.73554	16.174	0.000207731	0.030258	36	24	28	30	41	41	23	19	5	7	18	12
	ENSMUSG00000038147.15	Cd84	-0.874587	6.19692	45.4847	7.37854e-08	0.000312262	258	544	364	180	370	210	585	568	104	447	591	715
	ENSMUSG00000038156.17	Spon1	-0.44177	6.96915	16.3348	0.000195048	0.0292716	429	748	606	429	729	334	691	678	132	572	882	860
	ENSMUSG00000038178.17	Slc43a2	-0.493213	6.72204	23.99	1.18306e-05	0.00494134	437.38	663.29	484.22	387.24	483.47	309.89	618.44	652.78	122.43	506.71	642.95	791.55
	ENSMUSG00000038366.16	Lasp1	-0.394918	7.67995	14.0482	0.000486513	0.0498644	816	1413.97	1044.01	620	1022	763.95	1263	1244.44	239.02	934	1310.96	1392.99
	ENSMUSG00000038608.16	Dock10	-0.560493	7.01421	21.2492	4.43212e-05	0.0118191	522	838	751	427	749	458	860	872	201	670	960	1086
	ENSMUSG00000038623.10	Tm6sf1	-0.661263	5.49771	30.9039	1.23722e-06	0.00129972	174.42	296.81	218.18	131	242.99	152.28	328.72	282.61	50.6	251.53	352.05	406.72
	ENSMUSG00000039062.16	Anpep	-0.588381	6.79476	24.4871	1.37027e-05	0.00558862	500	936	723	413	735	428	857	878	196	787	1002	981
	ENSMUSG00000039158.12	Akna	-0.540582	6.39582	23.3588	1.47116e-05	0.00592537	338	537	397	229	444	317	543	548	116	400	587	596
	ENSMUSG00000039193.10	Nlrc4	-0.741356	2.76883	14.0427	0.000487611	0.0498644	29	42	44	17	38	27	58	52	14	28	64	66
	ENSMUSG00000039316.15	Rftn1	-0.529877	5.42251	21.8817	2.47111e-05	0.0082371	193	264	195	137	241	155	279	292	58	214	294	326
	ENSMUSG00000039621.14	Prex1	-0.510082	6.86748	22.4937	1.99038e-05	0.00724726	499	776	581	350	590	390	688	752	153	584	832	839
	ENSMUSG00000039637.16	Coro7	-0.409577	6.16239	17.3286	0.000132708	0.0224798	276	424	371	275	424	281	456	440	92	341	484	522
	ENSMUSG00000039942.16	Ptger4	-0.488186	4.84655	18.0422	0.000101079	0.0192533	144.25	203.88	182.91	131.58	166.23	143.02	252.2	211.81	44	169.54	233.68	271.58
	ENSMUSG00000039981.7	Zc3h12d	-0.677094	4.90503	16.2581	0.000362773	0.0417815	78	187	150	55	173	105	194	223	33	151	214	214
	ENSMUSG00000040488.19	Ltbp4	0.48045	7.79253	18.9112	7.28895e-05	0.0164082	1742	1730	1230	1751	1634	1234	1244	1128	187	1071	1122	1137
	ENSMUSG00000040552.9	C3ar1	-0.879201	7.62714	18.2936	0.00038234	0.0432294	619	1490	1247	598	1056	586	1895	1607	287	1274	1749	2052
	ENSMUSG00000040613.15	Apobec1	-0.597846	6.29028	18.305	0.000176813	0.0273642	323	536	385	189	482	305	570	519	103	386	575	738
	ENSMUSG00000040699.14	Limd2	-0.455865	5.46878	18.4046	8.81399e-05	0.0179946	219	278	218	163	278	181	322	306	67	220	325	323
	ENSMUSG00000040752.17	Myh6	1.3612	1.01292	15.7097	0.000249419	0.0341007	18.77	11.65	6.26	10.5	18.9	12.66	6.29	6.2	1.09	6.23	3.18	3.12
	ENSMUSG00000040907.16	Atp1a3	-0.852726	4.44819	23.6116	2.9715e-05	0.00928045	61	135	102	40	94	54	144	153	35	92	129	183
	ENSMUSG00000040990.18	Sh3kbp1	-0.426282	5.93877	19.6405	5.56078e-05	0.0134745	270	482	371	281	375	245	478	427	90	413	423	479
	ENSMUSG00000041120.7	Nbl1	0.477687	6.46702	22.4116	2.04873e-05	0.00724726	625	722	526	576	629	603	485	434	71	422	497	426
	ENSMUSG00000041642.19	Kif21b	-0.691934	5.35687	27.8275	3.75392e-06	0.00247397	174	226	153	106	193	135	244	274	62	187	244	337
	ENSMUSG00000041926.16	Rnpep	-0.439878	6.26912	17.3583	0.000131203	0.0224059	365.93	547.84	443.39	277.61	469.71	380.97	550.29	513.42	125.8	433.33	606.01	627.29
	ENSMUSG00000042010.17	Acacb	0.541393	6.28605	16.2563	0.000314546	0.0380872	710	595	418	624	602	417	440	388	64	401	346	392
	ENSMUSG00000042129.9	Rassf4	-0.478648	7.24374	17.7611	0.000118528	0.0208614	605	1102	846	472	834	539	995	951	196	824	1063	1184
	ENSMUSG00000042254.15	Cilp	0.455343	7.71612	23.2629	1.52098e-05	0.00599179	1582	2239	1331	1604	1594	1510	1341	1112	192	1189	1229	1269
	ENSMUSG00000042351.10	Grap2	-0.633783	4.62499	15.9815	0.000294808	0.0369128	109	146	107	55	126	67	160	155	36	101	181	169
	ENSMUSG00000043004.14	Gng2	-0.616946	5.13181	24.9577	8.505e-06	0.00390074	121	228.22	172.6	121.45	197	119	245	200	51	162	268	329
	ENSMUSG00000043832.14	Clec4a3	-0.942575	5.0109	24.5722	5.2508e-05	0.0133845	108	266	195	95	240	114	307	279	73	252	349	368
	ENSMUSG00000044811.14	Cd300c2	-1.02735	4.60856	35.0648	1.6119e-06	0.00151026	70.63	121.65	107.62	47.61	121.65	60.6	169	166.44	31	118	198.22	251.44
	ENSMUSG00000044827.11	Tlr1	-0.966603	5.03932	27.9534	1.95472e-05	0.00720898	104.09	250.37	196.35	70.9	156.84	97.51	298.39	274.62	47.61	181.39	326.13	346.29
	ENSMUSG00000045312.13	Lhfpl2	-0.775808	5.51184	43.3112	3.50978e-08	0.000312262	189	315	236	153	184	140	320	321	79	250	351	433
	ENSMUSG00000045551.8	Fpr1	-1.47602	1.52835	25.2832	7.61958e-06	0.00379352	6	12	13	11	8	4	23	23	2	17	35	34
	ENSMUSG00000045658.17	Pid1	-0.689588	6.49301	38.8946	1.17193e-07	0.000369338	324	647	446	285	436	281	670	633	133	448	602	809
	ENSMUSG00000045980.14	Tmem104	-0.710816	6.08295	29.9687	3.29241e-06	0.00228276	234	440	345	203	327	184	448	432	96	342	477	606
	ENSMUSG00000046245.14	Pilra	-0.854816	3.60298	25.6607	6.71208e-06	0.00352781	45.77	77.89	60.88	32.11	50.62	51.13	106.2	104.42	10.71	80.59	101.22	105.98
	ENSMUSG00000048120.17	Entpd1	-0.534089	6.20734	20.4724	4.38623e-05	0.0117874	288	538	457	228	406	270	552	479	91	407	608	600
	ENSMUSG00000048498.8	Cd300e	-1.1036	3.3832	33.8105	5.10261e-07	0.000846825	31	58	38	14	45	22	74	71	13	62	75	88
	ENSMUSG00000048537.17	Phldb1	0.450065	6.95381	16.5115	0.000182044	0.0280389	890	918	697	796	769	757	676	589	107	528	597	606
	ENSMUSG00000048583.17	Igf2	0.703816	5.22129	31.394	1.06298e-06	0.0012707	322	265	193	325	244	203	182	138	33	156	172	146
	ENSMUSG00000048779.6	P2ry6	-0.721635	4.20199	20.8116	4.00245e-05	0.011299	77	151	71	62	90	42	125	120	24	122	155	143
	ENSMUSG00000049109.16	Themis	-1.09428	3.04527	19.1778	0.000144834	0.023796	30	64	26	7	50	31	65	64	20	43	98	81
	ENSMUSG00000049130.7	C5ar1	-0.73619	5.66691	28.1394	6.4206e-06	0.00347786	212	297	210	128	208	146	320	343	70	213	375	384
	ENSMUSG00000049551.3	Fzd9	1.80222	0.604901	18.3985	8.83426e-05	0.0179946	13	16	8	7	8	11	5	2	1	4	0	3
	ENSMUSG00000049625.7	Tifab	-0.851253	4.82284	29.4264	4.80539e-06	0.00292261	81	193	154	77	138	71	191	181	46	138	250	281
	ENSMUSG00000049723.15	Mmp12	-2.15179	0.645527	21.2281	4.70545e-05	0.0121896	3	7	2	3	5	2	41	11	0	22	8	7
	ENSMUSG00000049775.17	Tmsb4x	-0.406607	9.02124	14.9231	0.000341302	0.0401082	2699	4223	2822	2198	3617	2390	3985	3779	748	3048	4317	4521
	ENSMUSG00000049791.5	Fzd4	0.727009	6.49228	28.4031	8.65307e-06	0.00390074	816	771	485	733	757	601	569	414	57	430	352	427
	ENSMUSG00000049892.8	Rasd1	0.978014	2.17024	17.429	0.000127694	0.0219807	27	49	29	33	33	29	21	18	4	22	13	8
	ENSMUSG00000050141.14	Fam205c	2.00331	0.0679775	15.2615	0.000298052	0.0370343	5	6	5	10	11	7	1	2	0	3	3	0
	ENSMUSG00000050241.9	Klre1	-2.14911	0.420644	28.6112	2.55167e-06	0.00196575	3	5	1	1	5	3	8	13	4	9	12	24
	ENSMUSG00000050592.9	Fam78a	-0.824857	3.53419	28.4109	2.7213e-06	0.00205085	37.99	68.19	43	32.03	49	34.49	79.48	73.46	19.02	50.45	79.37	96.43
	ENSMUSG00000050708.17	Ftl1	-0.585107	9.56204	19.6917	9.9035e-05	0.0190736	3057.62	5061.38	3793.7	2352.06	4485.32	2799.56	5055.13	5168.58	1025.94	3858.68	5960.74	6580.85
	ENSMUSG00000050721.10	Plekho2	-0.451835	7.81836	14.9253	0.000386644	0.0433779	895	1415	1160	550	1379	835	1397	1346	270	1039	1643	1609
	ENSMUSG00000051498.8	Tlr6	-0.739577	3.92555	17.2011	0.000184286	0.0281438	45.91	100.63	87.65	33.1	84.16	45.49	116.61	105.38	11.39	74.61	129.87	145.71
	ENSMUSG00000051506.18	Wdfy4	-0.471522	6.24117	16.8189	0.000161545	0.0259646	371	437	420	228	406	269	499	489	95	367	535	567
	ENSMUSG00000051735.8	Rinl	-0.724181	4.16342	21.923	2.43518e-05	0.0082371	72	116	83	43	86	60	101	121	30	108	141	139
	ENSMUSG00000051906.16	Cd209f	1.44162	1.1267	14.8465	0.000413273	0.0451278	40.43	26.53	6	29.69	22.59	5	10	7	1	9	7	7
	ENSMUSG00000052102.16	Gnpda1	-0.70335	5.0635	30.2761	1.50499e-06	0.00144927	152.74	255.47	180.85	102.45	168.32	112.55	247.61	262.64	46.5	201.65	257.01	346.04
	ENSMUSG00000052160.8	Pld4	-0.690958	6.7725	32.5651	1.28198e-06	0.00130712	392	672	543	318	619	313	773	729	150	570	744	953
	ENSMUSG00000052298.13	Cdc42se2	-0.412888	5.94374	15.1994	0.000305527	0.0375783	271	459	346	255	359	282	511	424	74	336	422	522
	ENSMUSG00000052688.13	Rab7b	-0.534818	6.88937	25.2255	7.76935e-06	0.00379352	450	879	713	479	723	355	856	795	169	694	878	1020
	ENSMUSG00000052911.10	Lamb2	0.48961	7.37276	17.8312	0.000124936	0.0216558	1278	1330	940	1280	1173	989	861	781	147	840	901	827
	ENSMUSG00000052934.15	Fbxo31	0.504843	5.53697	14.9063	0.000396524	0.0439296	400	330	233	331	371	320	312	185	49	227	227	216
	ENSMUSG00000053044.9	Cd8b1	-1.07665	1.78197	15.1449	0.000312262	0.0380872	16	17	12	3	13	11	25	37	4	14	21	32
	ENSMUSG00000053158.11	Fes	-0.430544	6.44468	14.0544	0.000485273	0.0498644	334	504	451	243	501	297	541	486	93	417	574	604
	ENSMUSG00000053541.4	Gvin-ps6	-0.763156	4.16339	26.4233	5.20645e-06	0.00293593	72	153	106	49	107	67	155	169	29	109	160	181
	ENSMUSG00000053687.16	Dpep2	-0.501905	4.94589	14.9065	0.000343574	0.0402388	108.02	250.82	169.14	104.63	178.66	123.99	246.13	209.59	43.89	163.11	226.39	237.23
	ENSMUSG00000053977.14	Cd8a	-0.829412	3.33998	20.0916	4.7117e-05	0.0121896	36	80	40	17	45	36	88	80	17	49	76	72
	ENSMUSG00000054435.17	Gimap4	-0.628549	5.00425	20.6156	4.5608e-05	0.011978	140	228	149	72	165	149	252	223	46	161	255	264
	ENSMUSG00000054640.16	Slc8a1	-0.484507	6.02179	15.9377	0.000245661	0.0339296	261	443	308	214	451	232	416	381	91	327	501	547
	ENSMUSG00000054855.14	Rnd1	0.797715	3.50416	16.5642	0.000227521	0.0325929	90	72	114	52	95	109	67	50	8	33	76	39
	ENSMUSG00000055435.7	Maf	-0.331801	8.15907	15.1982	0.000305682	0.0375783	1592	2557.95	1938.25	1740	1919	1560	2370.89	2327.43	474	1967.46	2361	2658
	ENSMUSG00000056069.11	Otulinl	-0.572432	4.50246	20.7468	3.71212e-05	0.0110926	119	167	116	82	139	86	144	157	36	135	223	205
	ENSMUSG00000056091.13	St3gal5	-0.665091	4.26593	19.6338	5.57463e-05	0.0134745	74	102	61	56	72	55	113	106	19	75	123	143
	ENSMUSG00000056328.15	Myh1	0.913881	11.4174	19.7395	0.000252395	0.0341789	25026.5	23915.1	11674.8	24035.4	23461.1	18711.4	16277.7	12158.7	1283.65	11126	10393.5	11001.7
	ENSMUSG00000056413.17	Adap1	-0.534826	4.33084	15.0843	0.000319933	0.0382453	94	116	106	59	110	67	126	116	34	97	138	165
	ENSMUSG00000056427.11	Slit3	0.430367	6.0172	17.2329	0.00013768	0.0228371	439	529	409	444	503	328	381	348	69	285	300	298
	ENSMUSG00000056529.8	Ptafr	-0.814019	6.72391	23.2705	7.71258e-05	0.0165385	387	634	552	195	389	288	644	670	154	492	782	882
	ENSMUSG00000056917.14	Sipa1	-0.504081	5.62559	15.6924	0.000276782	0.0363455	256	293	234	161	230	206	334	322	65	225	389	362
	ENSMUSG00000057058.17	Skap1	-0.87516	2.86662	17.6232	0.000118548	0.0208614	24	68	37	19	25	26	59	52	19	41	61	70
	ENSMUSG00000057969.16	Sema3b	0.605681	3.84903	15.1107	0.000316565	0.0381055	93	117	67	97	78	74	62	47	9	55	61	67
	ENSMUSG00000058099.17	Nfam1	-0.435245	6.27274	16.4153	0.00018901	0.0284887	298	598	406	255	373	269	527	459	92	359	548	558
	ENSMUSG00000058297.17	Spock2	1.13882	3.85908	38.4259	2.51907e-07	0.000559695	132	92	74	152	101	88	58	47	8	41	51	51
	ENSMUSG00000059146.13	Ntrk3	1.19692	2.13801	21.2094	3.14188e-05	0.00972496	33	49	32	52	29	23	16	18	0	18	12	19
	ENSMUSG00000059555.7	Tor4a	-0.478875	5.05968	17.4211	0.000128079	0.0219807	176	212	162	146	193	170	254	255	58	175	250	268
	ENSMUSG00000059895.14	Ptp4a3	0.456596	6.08729	16.2406	0.000202373	0.0299815	470	590	340	496	512	472	437	320	60	335	346	341
	ENSMUSG00000060131.12	Atp8b4	-0.705791	5.3767	33.2261	6.08055e-07	0.000878349	165	268	222	106	224	156	299	285	58	235	357	368
	ENSMUSG00000060216.16	Arrb2	-0.669491	5.83984	23.3335	2.92032e-05	0.00927347	236	347	245	124	281	160	341	363	78	246	415	432
	ENSMUSG00000061119.8	Prcp	-0.509962	5.46116	22.4235	2.04017e-05	0.00724726	198	366	240	218	280	182	336	343	59	314	348	422
	ENSMUSG00000061175.13	Fnip2	-0.616332	7.64491	28.6036	3.19698e-06	0.00226183	729	1399	1144	601	1054	625	1318	1348	293	1063	1459	1668
	ENSMUSG00000061288.14	Taok3	-0.419533	6.11572	15.0278	0.000327258	0.0389865	272	519	453	265	436	262	515	501	102	358	503	521
	ENSMUSG00000061780.7	Cfd	0.777314	6.08572	42.2105	6.58027e-08	0.000312262	885	727	539	861	726	652	445	397	89	401	470	422
	ENSMUSG00000062515.4	Fabp4	0.590282	6.26596	25.1356	8.8891e-06	0.00390074	737	624	561	622	545	525	453	373	66	415	388	432
	ENSMUSG00000062524.5	Ncr1	-1.47991	2.14185	33.962	4.87694e-07	0.000846825	9	28	11	11	19	13	42	46	14	28	37	44
	ENSMUSG00000062694.8	Cav3	0.593138	3.96903	16.4199	0.000188671	0.0284887	116	119	73	83	113	97	89	62	10	52	73	64
	ENSMUSG00000063193.10	Cd300lb	-0.984349	3.31824	28.8233	2.38406e-06	0.00190222	48	77	53	45	37	22	77	97	19	67	101	115
	ENSMUSG00000063531.8	Sema3e	0.552371	4.00312	15.5605	0.000264611	0.0352818	140	164	132	150	134	98	99	81	12	102	97	98
	ENSMUSG00000064065.16	Ipcef1	-0.625657	3.62214	15.4243	0.000279331	0.0365418	52	94	63	33	77	35	95	77	16	76	99	104
	ENSMUSG00000066279.4	Chrna10	1.54439	1.92896	31.7101	9.64382e-07	0.00119401	47.4	32.67	31.56	30.22	40.62	37.61	19.46	9.13	2	12.39	19.14	3.77
	ENSMUSG00000066361.4	Serpina3c	0.852578	3.90474	17.0722	0.0003042	0.0375783	161	158	153	121	136	81	98	77	10	75	81	51
	ENSMUSG00000066705.8	Fxyd6	0.501342	5.34543	19.3669	6.15251e-05	0.0146704	261	271	241	279	302	242	201	198	24	181	218	182
	ENSMUSG00000069372.4	Ctxn3	0.861828	3.29763	22.729	1.83252e-05	0.00683097	104	108	47	100	83	66	60	46	5	40	39	56
	ENSMUSG00000069607.5	Cd300ld3	-0.721562	5.11585	20.7149	7.72847e-05	0.0165385	126	213.73	148.24	84.12	130.93	76.44	197.68	214.68	26.93	173.99	213.51	296.3
	ENSMUSG00000069763.4	Tmem100	0.616181	4.1542	16.501	0.00018279	0.0280389	131	155	120	128	162	119	131	98	11	86	72	70
	ENSMUSG00000069911.12	Insyn2b	-0.624589	4.98034	20.8133	4.00894e-05	0.011299	143	203	191	78	179	98	239	234	39	150	269	262
	ENSMUSG00000070390.13	Nlrp1b	-0.676934	4.92736	21.3767	4.2027e-05	0.0116556	91	199	161	67	162	128	228	162	41	169	231	280
	ENSMUSG00000071311.3	Gpr31b	-1.28847	2.26414	26.3325	5.3655e-06	0.00295248	11	20.11	25.16	5.09	20.21	11.9	35.1	40.18	4.85	28.66	36.23	55.46
	ENSMUSG00000071637.6	Cebpd	0.626031	5.35298	16.9315	0.000268442	0.0355194	313.08	283.87	253.47	255.85	354.16	273.77	212.6	182.47	35.29	150.39	238.2	164.81
	ENSMUSG00000071656.8	Lrrn4cl	0.835357	4.23335	26.6694	6.71635e-06	0.00352781	165	173	120	191	143	113	124	66	9	87	64	100
	ENSMUSG00000072720.10	Myo18b	0.647295	7.00542	21.4736	7.19206e-05	0.0162959	1129.94	999	598.92	1008.94	873.81	812	739.93	605	82	508	548.81	635.93
	ENSMUSG00000073412.7	Lst1	-0.919343	3.21644	21.58	2.75138e-05	0.0089142	24	59	33	15	40	30	50	53	17	39	79	82
	ENSMUSG00000073421.7	H2-Ab1	-0.440885	7.49962	14.6726	0.000413956	0.0451278	925	1280	990	673	1375	716	1305	1083	279	1195	1514	1446
	ENSMUSG00000073492.3	Gm10521	-1.02984	2.75414	18.1178	0.000123565	0.0215258	22	33	44	8	17	14	50	42	9	36	59	48
	ENSMUSG00000073530.12	Pappa2	0.7831	3.11512	20.6999	3.7757e-05	0.0110926	58	80	47	74	64	48	40	37	6	36	42	25
	ENSMUSG00000073557.13	Ppp1r12b	0.506307	6.98541	21.0687	3.30498e-05	0.0100503	1051.01	1156.96	654.99	1130.59	1011.53	770.6	877.85	603.1	103	671.38	616.99	733.73
	ENSMUSG00000074207.11	Adh1	0.684811	4.57458	24.9102	8.64299e-06	0.00390074	204	185	150	232	192	125	97	143	17	121	102	111
	ENSMUSG00000074218.4	Cox7a1	0.926975	2.48707	14.5676	0.000408548	0.045083	55	45	29	40	59	30	28	25	0	21	22	24
	ENSMUSG00000074419.12	Gm15448	-1.17187	3.24379	24.505	2.94252e-05	0.00927347	25.14	55.98	58.31	13.83	50.15	29.62	90.29	94.19	22.23	56.53	76.96	102.63
	ENSMUSG00000074634.13	Tmem267	1.28814	2.3446	17.8123	0.000262141	0.0352234	35.77	82	48	49	116	74	33	24	8	20	22	33
	ENSMUSG00000074802.12	Gas2l3	-0.50117	4.83371	18.1927	9.54778e-05	0.0185951	126	247	171	149	158	104	244	216	47	204	193	238
	ENSMUSG00000075284.11	Wipf1	-0.411127	6.6989	18.3015	9.16347e-05	0.0182569	429	770	511	379	612	393	718	664	125	532	736	753
	ENSMUSG00000078122.5	F630028O10Rik	-0.736357	4.93779	21.0179	7.43376e-05	0.0165385	140	259	210	106	153	94	262	242	62	206	272	295
	ENSMUSG00000078721.2	Fam205a1	1.19057	1.4246	16.5867	0.000176795	0.0273642	13.55	16.94	18.56	23.24	28.86	13.47	7	5.75	0	10.37	11.96	8.47
	ENSMUSG00000078722.3	Gm12394	1.06509	2.66075	22.9946	1.66998e-05	0.00636189	51.33	39.6	31.78	46.52	52.84	25.57	26.82	13.33	1.08	19.55	28.4	14.72
	ENSMUSG00000078780.8	Gm5150	-1.02809	3.10611	20.0602	8.86995e-05	0.0179946	23	66	50	10	52	25	69	63	15	53	91	101
	ENSMUSG00000078942.11	Naip6	-0.570432	4.59913	16.7324	0.000167058	0.0266884	105.89	189.56	159.01	81.26	137.47	85.84	187.68	169.99	42.52	136.32	198.73	216.56
	ENSMUSG00000078945.11	Naip2	-0.63626	4.89552	20.279	5.44306e-05	0.0134745	120.91	237.97	180.97	84.42	193.98	128.95	258.31	226.64	56	165.13	293.66	240.6
	ENSMUSG00000079547.5	H2-DMb1	-0.67762	5.19941	19.9113	9.27569e-05	0.0183749	109.36	213.09	171.39	86.91	238.77	120.15	232.46	205.75	45.73	245.89	278.88	272.15
	ENSMUSG00000081665.3	Gm15922	-0.70647	4.60294	16.209	0.000376031	0.0428811	83.95	141.86	168.53	69.86	137.76	92.19	232.5	171.37	38.43	130.85	196.4	206.66
	ENSMUSG00000088835.3	Gm23547	-0.977564	2.23133	16.2697	0.000200078	0.0297687	13.26	25.51	18.11	19.71	19.73	6.35	26.08	38.57	6	22.94	42.69	37.92
	ENSMUSG00000089809.10	Rasgef1b	-0.511644	5.18522	18.829	7.51613e-05	0.0165385	177	235	226	154	242	129	291	298	54	200	277	305
	ENSMUSG00000089942.10	Pira2	-1.04564	6.03195	18.2871	0.000395134	0.0439296	180.25	489.92	290.21	96.12	354.67	149.55	535.13	535.06	104.97	339.27	543.48	628.82
	ENSMUSG00000090210.8	Itga10	0.641728	3.89427	20.3573	4.2762e-05	0.0117355	109.56	124.17	88.77	116.03	89.13	90.33	77.1	56.17	9	72.93	62.48	69.83
	ENSMUSG00000091345.10	Col6a5	-4.80892	1.77353	22.3729	0.000141714	0.0233942	3	3	0	4	2	2	109.65	3.63	1	231.21	4	14
	ENSMUSG00000095677.3	Dynlt1f	-0.519747	4.24237	14.5525	0.0003963	0.0439296	74.79	141.11	113.91	91.52	102.62	89.13	136.66	128.82	29.22	116.19	169.06	176.45
	ENSMUSG00000095788.7	Sirpb1a	-1.1484	3.69654	30.9698	4.4842e-06	0.00282643	45.37	89.94	61.98	25.22	67.24	29.54	111.42	110.71	22.28	69.11	145.89	145.37
	ENSMUSG00000097415.3	AU020206	-0.502796	5.73725	18.6318	8.09245e-05	0.0172111	220	387	319	154	315	199	399	356	76	289	407	393
	ENSMUSG00000097715.3	Gpr137b-ps	-0.483744	5.37686	17.6659	0.000116631	0.0208614	157.15	313.17	235.19	182.63	262.38	151.95	326.76	305.86	52.43	257.15	290.08	333.26
	ENSMUSG00000097767.9	Miat	0.816595	3.15028	14.6273	0.000409645	0.045083	61.41	73	40.03	54.21	49	52.14	30	29.6	10	31.23	24	33.76
	ENSMUSG00000101585.7	1600010M07Rik	-2.21031	0.116604	19.6229	5.59705e-05	0.0134745	0	3	2	0	3	2	3	10	2	6	11	10
	ENSMUSG00000101823.2	Gm29438	-0.994072	2.14218	16.6381	0.000173294	0.0273072	11	23	15	11	12	10	29	25	5	14	30	39
	ENSMUSG00000106427.2	Gm42820	-0.475741	4.01692	15.3125	0.000292044	0.0368157	82.42	125.86	93.66	91.23	93.94	62.18	129.35	130.64	23.12	122.69	139.35	111.05
	ENSMUSG00000106631.3	Gm42669	-0.918007	1.68193	14.6984	0.000373604	0.042745	10.78	14.09	16.38	12.93	9.11	12.92	27.43	21.47	4.82	25.54	24.47	21.78
	ENSMUSG00000107040.2	Gm43791	4.69896	-1.04051	16.5491	0.000203789	0.0300629	0	2.06	1.93	7.47	3.05	5.79	0	0	0	0	0	0
	ENSMUSG00000116766.2	Gm49702	2.78363	-0.597537	14.3528	0.000429726	0.0459794	2	6	4	3	4	2	1	1	0	0	0	0

## Sheet: c IPA USR 340 DEGs
IPA USR anlysis of DEGs from b (n=340) (direct and indirect interactions)	Upstream Regulator	Expr Log Ratio	Molecule Type	Predicted Activation State	Activation z-score	Flags	p-value of overlap	Target Molecules in Dataset	Mechanistic Network
	TCL1A		transcription regulator				3.1e-11	APOBEC1,C1QA,C1QB,C3AR1,CD300LD,CTSB,CTSH,FPR1,IGSF6,ITGAM,ITGB2,LY9,MMP12,SLC11A1	73 (7)
	DYSF		other				1.14e-06	C1QB,CFD,CTSH,FTL,HLA-DQA1,HLA-DQB1,LCP1,MMP12,SCD,SERPINA3
	TYROBP		transmembrane receptor				2.69e-06	CD84,ITGAM,ITGAX,LHFPL2,NCKAP1L,SIRPB1,TGFB1,TMEM106A
	MAPT		other				4.23e-06	ABCG1,APOBEC1,ATP1A3,AU020206,C1QB,C3AR1,CAP1,CD84,CKB,CYFIP2,DOCK2,GALNT15,GNG2,HLA-DQA1,HLA-DQB1,ITGAX,ITGB2,LCP1,LY86,LY9,Plscr2,SLC37A2,UCP2	102 (7)
	RXRB		ligand-dependent nuclear receptor				9.32e-06	ATP1A3,C1QA,CTSB,FABP4,FGFR1,IGFBP6,MMP12,MMP2	87 (7)
	platelet activating factor-C16		chemical - endogenous mammalian				1.13e-05	ITGAM,PLA2G7,PTAFR
	GW501516		chemical drug				1.95e-05	APOD,CFD,FGFR1,GPD1,IGFBP6,MMP12,PLIN2,SCD,UCP2	123 (17)
	resolvin D5		chemical - endogenous mammalian				5.54e-05	ITGAM,PLA2G7,PTGER2
	PLIN1		other				0.000132	ACACB,ADGRE1,ITGAX,UCP2
	CCL-34		chemical reagent				0.000152	CD8A,ITGAM,ITGAX
	CERS3		transcription regulator				0.000202	ASAH1,CERS2
	NPC1		transporter				0.000282	ABCG1,CD8A,CTSB,HLA-DQB1,ITGAX,LIPA,SCD	32 (3)
	PLIN2	-0.609	other				0.000319	ABCG1,ADGRE1,UCP2	30 (3)
	BSCL2		other				0.000324	CFD,CYFIP2,CYP2E1,FABP4,GPD1,PC
	NKX2-1		transcription regulator				0.000365	CYGB,ENPP2,IGFBP6,INMT,MMP2,PC,Plscr2,SCARA3,SCD,TGFB1
	MBOAT7		enzyme				0.000434	ACACB,DHCR24,SCD	43 (5)
	MTA3		transcription regulator				0.000471	CIITA,MYH6,TGFB1,ZEB2
	16,16-dimethylprostaglandin E2		chemical - endogenous mammalian				0.000572	MMP2,PTGER2,PTGER4	59 (7)
	Il8r		group				0.000572	ITGAM,ITGAX,MMP2	66 (7)
	mimosine		chemical drug				0.000572	CIITA,HLA-DQA1,HLA-DQB1
	CERS4		transcription regulator				0.000601	ASAH1,CERS2
	Ap1 gamma		group				0.000601	CD28,CD8B
	GPR34		G-protein coupled receptor				0.000601	ITGAM,ITGB2	51 (7)
	IRS1		enzyme				0.000718	CEBPD,COX7A1,FABP4,MAPK12,NRP1,TGFBI,TNXB,UCP2	67 (4)
	CSF2RA		transmembrane receptor				0.000736	ADGRE1,ITGAM,PIK3CG
	LDLR		transporter				0.000795	ABCG1,APOBEC1,C1QA,CD300E,FPR1,GRAP2,LCP2,LY86,MMP2,SCD,TLR1	37 (3)
	MYOG		transcription regulator				0.00106	ACACB,CAV3,IGF2,MYF6
	BDKRB2		G-protein coupled receptor				0.00115	CCN2,ITGAM,TGFB1	124 (17)
	EDNRA		transmembrane receptor				0.00115	ITGAM,MMP2,TGFB1	65 (7)
	ENPP2	0.394	enzyme				0.00115	ENPP2,FABP4,ITGAM
	Z-551		chemical reagent				0.00115	ADGRE1,ITGAM,UCP2	69 (7)
	perindopril		chemical drug				0.00115	ACE,CCN2,TGFB1
	ENPP7		enzyme				0.00119	ENPP2,PTAFR
	ACSL3		enzyme				0.00119	ACACB,SCD	42 (5)
	halofuginone		chemical drug				0.00148	ANXA4,CCN2,CKB,CYGB,FXYD6,MMP2,PPT1,TGFB1	93 (11)
	Ap2		group				0.00149	IGF2,LIPA,MMP2,TGFB1
	14,15-epoxyeicosatrienoic acid		chemical - endogenous mammalian				0.00168	FABP4,PIK3CG,TNFRSF11A	101 (11)
	desoxycorticosterone		chemical - endogenous mammalian				0.00168	CCN2,MMP12,TGFB1	97 (8)
	sitagliptin		chemical drug				0.00168	CCN2,FABP4,TGFB1	84 (11)
	VSIR	-0.447	other				0.00168	FABP4,SCD,VSIR	79 (7)
	IL13RA2		transmembrane receptor				0.00168	LILRB3,MMP12,TGFB1	75 (7)
	ITGB6		other				0.00168	MMP12,MMP2,TGFB1	88 (14)
	rofecoxib		chemical drug				0.00168	BCL2L11,MMP2,TBC1D9	24 (3)
	IntegrinÎ±		group				0.00196	ITGAM,ITGB2
	ELMO1		other				0.00196	DOCK2,TGFB1
	AD-5057		chemical drug				0.00196	FABP4,UCP2	117 (11)
	15(S)-HETE		chemical - endogenous mammalian				0.00199	ABCG1,FABP4,MMP2	79 (12)
	Fcgr3		group				0.00199	ITGAM,ITGAX,ITGB2	112 (17)
	AGPAT2		enzyme				0.00199	FABP4,PLD4,SCD
	elastase		group				0.00199	MMP12,MMP2,TGFB1	127 (15)
	latrunculin B		chemical reagent				0.00199	CCN2,DES,MYOC	31 (3)
	SOD1		enzyme				0.00225	APEX1,ATP1A3,C1QA,C5AR1,CKB,FGFR1,KCNAB2,P2RX4,P2RY6,TGFB1,Tmsb4x (includes others)	130 (13)
	thiazolidinedione		chemical drug				0.00234	ABCG1,CAP1,UCP2	115 (12)
	Sos		group				0.00253	FABP4,FBLIM1,GM2A,MYH6,SCD,SEMA3B,SEMA3E,SIRPA,TGFB1
	PRKAG3	1.077	kinase				0.00268	CD93,FGFR1,FTL,FXYD6,RNF128,SH3KBP1,TMEM100,ZEB2
	SUCNR1		G-protein coupled receptor				0.00272	LAMA2,LAMB2,MYH1
	batimastat		chemical - protease inhibitor				0.00272	FABP4,HAVCR2,MMP2	73 (11)
	HDAC3		transcription regulator				0.0028	ACACB,ENPP2,MMP12,PLIN2,SCD,TBX2
	conduritol epoxide		chemical reagent				0.00292	GSN,MMP2
	F Actin		complex				0.00292	CCN2,MMP2
	CERS5		transcription regulator				0.00292	ASAH1,CERS2
	AQP11		transporter				0.00292	MMP12,TGFB1
	FES	-0.431	kinase				0.00292	ITGAM,ITGAX
	BDKRB1		G-protein coupled receptor				0.00292	CCN2,TGFB1	105 (12)
	19,20-epoxydocosapentaenoic acid		chemical - endogenous mammalian				0.00292	DES,ZEB2
	APOM		transporter				0.00292	CCN2,TGFB1	52 (7)
	olmesartan medoxomil		chemical drug				0.00292	ACE,TGFB1	78 (5)
	quinapril		chemical drug				0.00292	ACE,CCN2
	ABCB4		transporter				0.00295	CCN2,DES,MMP2,TGFB1	50 (6)
	ibuprofen		chemical drug				0.00295	ITGAM,MMP2,PLIN2,SERPINA3	76 (7)
	resiquimod		chemical drug				0.00303	ADAM8,AIM2,ANXA4,C3AR1,CIITA,GM2A,GNG2,HAVCR2,ITGAX,PIK3CG,TNFRSF11A	101 (10)
	SPDEF		transcription regulator				0.00303	CCN2,FGFR1,LAMB2,LASP1,TGFB1
	LCP2	-0.662	other				0.00315	FYB1,ITGAM,NRP1
	retinol		chemical drug				0.00315	PLIN2,Stra6l,TGFB1
	GBX2		transcription regulator				0.00322	ENPP2,LAMA2,NRP1,SLIT3
	ELANE		peptidase				0.0035	C5AR1,CEBPD,CTSB,MMP2	134 (15)
	TNFRSF9		transmembrane receptor				0.0035	ANPEP,CD28,HLA-DQB1,ITGAM
	CEBPD	0.626	transcription regulator				0.00358	CEBPD,CYP2E1,FABP4,ITGAM,ITGAX,PTAFR
	lactosylceramide		chemical - endogenous mammalian				0.0036	CIITA,HLA-DQA1,TNFRSF11A	104 (9)
	PARPBP		other				0.0036	CYP2E1,INMT,SPON1
	SFTPD		other				0.0036	MMP12,MMP2,TGFB1	158 (19)
	ITGA11		other				0.0036	CCN2,DES,TGFB1
	TERF2IP		other				0.0036	CCN2,IGF2,SLIT3
	ANXA1		enzyme				0.0038	ANXA4,ITGAM,ITGB2,MMP2	119 (14)
	dextran sulfate		chemical drug				0.00391	ACE,ADAM8,CARD11,CCN2,ENPP2,FGFR1,LCP1,MMP2,NRP1,PTAFR,PTP4A3	137 (16)
	Alpha 1 antitrypsin		group				0.00405	CTSB,MMP2	24 (3)
	SCGB3A2		other				0.00405	MMP12,MMP2
	DGAT2		enzyme				0.00405	SCD,UCP2	33 (6)
	CCL18		cytokine				0.00405	MMP2,TGFB1	27 (4)
	CD2AP		other				0.00405	SH3KBP1,TGFB1
	PPM1B		phosphatase				0.00405	CEBPD,SLA
	PIK3C3		kinase				0.00405	HLA-DQB1,IGF2
	PROK1		growth factor				0.00405	CCN2,RCAN1
	FBLN5		other				0.00405	MMP2,TGFB1	57 (7)
	zimelidine		chemical drug				0.00405	ASAH1,SERPINA3
	jasplakinolide		chemical - endogenous non-mammalian				0.00405	CAV3,CCN2	36 (3)
	miR-19b-3p (and other miRNAs w/seed GUGCAAA)		mature microRNA				0.0041	BCL2L11,CCN2,COX7A1	60 (7)
	mir-33		microRNA				0.0041	ABCG1,CFD,FABP4
	EXT1		enzyme				0.0041	ACACB,CEBPD,FABP4
	DL-fructose		chemical - endogenous mammalian				0.0041	GPD1,SCD,TLR6
	TEAD4		transcription regulator				0.00413	CCN2,DES,FABP4,FGFR1,MYH1,RCAN1	46 (6)
	LMNA		other				0.00452	CCN2,CD28,CD93,DES,ENTPD1,FABP4,NPR2,PPM1H,SLC36A1,TGFB1	30 (3)
	STK40		kinase				0.0046	C1QA,C1QB,DES,FABP4,HLA-DQA1
	Il3		cytokine				0.0046	ADGRE1,ANPEP,BCL2L11,ITGAM,KSR1	73 (9)
	MLX		transcription regulator				0.00464	CCN3,IGF2,SCD
	LILRB1		transmembrane receptor				0.00464	MAF,MMP2,RECK
	BCL2L11	-0.485	other				0.00522	BCL2L11,CD84,TGFB1
	PCYT1A		enzyme				0.00522	FGFR1,GSN,SCD
	ANGPTL8		other				0.00535	ACACB,SCD
	GSK0660		chemical reagent				0.00535	C1QA,C1QB
	HPGDS		enzyme				0.00535	ITGAM,TGFB1
	GSC		transcription regulator				0.00535	TGFB1,ZEB2
	HEYL		transcription regulator				0.00535	MMP2,MYH6	108 (6)
	FYB1	-0.768	other				0.00535	ITGAM,SKAP1
	benzoic acid		chemical - endogenous mammalian				0.00535	ITGAM,ITGAX	69 (7)
	GNA15		enzyme				0.00563	CDO1,CEBPD,LAMB2,MICOS10-NBL1/NBL1,MYH1,SERPINA3
	BAHCC1		other				0.00583	FZD4,IKZF3,KLF9
	HEY1		transcription regulator				0.0065	MMP2,MYH6,TBX2	38 (6)
	L-cysteine		chemical - endogenous mammalian				0.00681	CDO1,SCD
	phosphatidylcholine		chemical - endogenous mammalian				0.00681	CYP2E1,SCD
	FA2H		enzyme				0.00681	CCN2,SCD
	ACACA		enzyme				0.00681	ACACB,SCD
	GPAM		enzyme				0.00681	PLIN2,SCD	73 (11)
	DES	0.519	other				0.00681	ACE,TGFB1
	SCUBE3		other				0.00681	MMP2,TGFB1
	ANPEP	-0.588	peptidase				0.00681	ANPEP,TGFB1
	manassantin B		chemical - endogenous non-mammalian				0.00681	CEBPD,SCD
	L-N6-(1-iminoethyl)-lysine		chemical reagent				0.00681	ITGAM,TGFB1
	JUNB		transcription regulator				0.0069	C1QB,C3AR1,C5AR1,CFD,MMP2,SCD,SLC8A1	107 (11)
	CCR1		G-protein coupled receptor				0.0072	ITGAM,MMP2,TNFRSF11A	122 (17)
	ROCK		group				0.0073	CCN2,DES,FABP4,TGFB1	93 (18)
	LMNB1		other				0.0073	PLIN2,SCD,SLIT3,TGFBI
	NPC2		transporter				0.00795	CTSB,PTGER2,PTGER4	64 (8)
	GABARAPL2		other				0.00795	CTSB,HEXA,LGMN
	HOXA7		transcription regulator				0.00795	CD93,LY86,Tmsb4x (includes others)
	BIRC5		other				0.00829	CCN2,HLA-DQA1,HLA-DQB1,MMP2
	F630028O10Rik	-0.736	other				0.00844	ITGAM,TGFB1
	CAVIN1		transcription regulator				0.00844	ADGRE1,ITGAX
	IL20		cytokine				0.00844	MMP12,TNFRSF11A	90 (7)
	FRMD6		other				0.00844	CCN2,RASSF4
	SIK1/SIK1B		kinase				0.00844	GPD1,SCD
	LPIN1		phosphatase				0.00874	FABP4,LPIN2,SCD	95 (15)
	GABARAPL1		other				0.00874	CTSB,HEXA,LGMN
	OXT		other				0.00874	COX7A1,MYH6,RCAN1
	PLAGL1		transcription regulator				0.00874	ADCYAP1R1,FABP4,PLIN2
	ramipril		chemical drug				0.00874	CCN2,MMP2,TGFB1	119 (11)
	FGF19		growth factor				0.0089	ACACB,HLA-DQB1,MMP12,SCD,SERPINA3
	RGS10		enzyme				0.00936	IL10RB,ITGAM,ITGB2,TGFB1
	SLC22A5		transporter				0.00957	LTBP4,TGFB1,TGFBI
	Focal adhesion kinase		group				0.00957	FZD4,ITGB2,MMP2	92 (14)
	GABARAP		transporter				0.00957	CTSB,HEXA,LGMN
	IFRD1		other				0.00957	CCN2,DES,LAMA2
	NCOR2		transcription regulator				0.00994	C1QA,CTSB,MMP12,MMP2	62 (8)
	NFKB1		transcription regulator				0.0101	CCN2,CD3G,CIITA,CTSB,ENPP2,HLA-DMB,POU2F2,PTAFR,SLC25A4,TGFB1
	8,9-epoxyeicosatrienoic acid		chemical - endogenous mammalian				0.0102	FABP4,PIK3CG
	LTB4R2		G-protein coupled receptor				0.0102	IRF5,MMP2
	HTR2B		G-protein coupled receptor				0.0102	SLC25A4,TGFB1
	LAMTOR1		other				0.0102	NRP1,SCD
	ERRFI1		other				0.0102	NAIP,Naip1 (includes others)
	ANGPTL3		growth factor				0.0102	ACACB,SCD
	Ncoa6		transcription regulator				0.0102	FABP4,SCD
	Cxcl3		cytokine				0.0102	CEBPD,FABP4
	nedocromil sodium		chemical drug				0.0102	MMP2,TGFB1
	rosmarinic acid		chemical - endogenous non-mammalian				0.0102	CCN2,MMP2
	tyrphostin AG 1296		chemical drug				0.0102	ITGAM,TGFB1
	desmosterol		chemical - endogenous mammalian				0.0102	ABCG1,DHCR24
	deferasirox		chemical drug				0.0105	ITGAM,ITGB2,PLD4
	irbesartan		chemical drug				0.0105	ACE,ITGAM,TGFB1
	EPO		cytokine				0.0105	BCL2L11,DES,DHCR24,FPR1,IGF2,LAPTM5,LCP1,MMP2,RNF128,UCP2
	IL11		cytokine				0.0105	CEBPD,FABP4,PAPPA2,SERPINA3
	IDH1		enzyme				0.0105	ABCG1,CFD,FABP4,ZEB2
	thioacetamide		chemical toxicant				0.0109	ANXA4,CCN2,CKB,CYGB,FXYD6,GPD1,MMP2,PPT1,TGFB1
	C1QA	-0.508	other				0.0114	C3AR1,C5AR1,SERPINA3
	UPF2		other				0.0114	CYFIP2,NRP1,RCAN1
	CR1L		transmembrane receptor				0.0114	CCN2,PTGER4,TGFB1
	CREBBP		transcription regulator				0.0118	CKB,FABP4,GIMAP4,GM2A,GNG2,MAF,MYH1,MYO1F,NTRK3,RGL1,SERPINA3,SLAMF6
	FOLR1		transporter				0.0121	ADH1C,ENTPD7,LAMB2,SCD,TNFRSF11A
	chlorcyclizine		chemical drug				0.0121	ASAH1,SERPINA3
	CLEC1B		transmembrane receptor				0.0121	LCP2,PLCG2
	WWC1		transcription regulator				0.0121	CCN2,RASSF4
	S100A12		other				0.0121	ABCG1,MMP2
	TRIB1		kinase				0.0121	RGL1,SCD
	CCL1		cytokine				0.0121	ITGB2,MMP2
	HSD11B2		enzyme				0.0121	CCN2,MYH6
	TWIST		group				0.0121	NRP1,ST3GAL5
	ELN		other				0.0121	MMP12,MMP2
	CDON		other				0.0121	ACE,CCN2
	CDN1163		chemical reagent				0.0121	ACACB,SCD
	FLCN		other				0.0124	BCL2L11,CKB,COX7A1
	bee venom		chemical - endogenous non-mammalian				0.0131	FYB1,HAS1,LCP2,LPIN2,RCAN1
	ZC3H12A		enzyme				0.0134	CEBPD,FABP4,MAF
	CHRNA7		transmembrane receptor				0.0134	CHRNA10,ITGAM,TGFB1
	ITGAM	-0.821	transmembrane receptor				0.0134	C5AR1,CD28,TGFB1
	PHB		transcription regulator				0.0134	IGF2,MMP2,TGFB1
	perhexiline		chemical drug				0.0142	ASAH1,SERPINA3
	Atrial Natriuretic Peptide		group				0.0142	CCN2,NPR2
	PLA2G2D		enzyme				0.0142	ITGAM,ITGAX
	CCL21		cytokine				0.0142	P2RX4,TGFB1
	MED16		transcription regulator				0.0142	CCN2,MMP2
	BGLAP		other				0.0142	ADGRE1,CIITA
	LAMA2	0.587	other				0.0142	DES,LAMA2
	15-deoxy-delta-12-14 prostaglandin D2		chemical - endogenous mammalian				0.0142	ITGAM
	17-phenyl-18,19,20-trinor-prostaglandin d2		chemical reagent				0.0142	ITGAM
	15S-methyl-prostaglandin d2		chemical reagent				0.0142	ITGAM
	(5Z,13E)-11alpha-hydroxy-9,15-dioxoprost-13-enoic acid		chemical - endogenous mammalian				0.0142	FABP4
	ergosterol		chemical - endogenous mammalian				0.0142	BCL2L11
	PIK3R6		kinase				0.0142	PIK3CG
	clofazimine		chemical drug				0.0142	PLIN2
	etalocib		chemical drug				0.0142	ITGAM
	artemether		chemical drug				0.0142	MMP2
	1,1,1-trichloroethane		chemical toxicant				0.0142	CYP2E1
	DNAJ		group				0.0142	ENPP2
	levocetirizine		chemical drug				0.0142	MMP2
	N-formyl-Nle-Leu-Phe		chemical reagent				0.0142	FPR1
	polyglactin 910		chemical reagent				0.0142	MMP2
	danshen extract		chemical drug				0.0142	TGFB1
	ZM 323881		chemical drug				0.0142	RCAN1
	Ctla2a/Ctla2b		other				0.0142	TGFB1
	ASB9		transcription regulator				0.0142	CKB
	FBXO46		other				0.0142	FBXO31
	CDC42BPB		kinase				0.0142	CTSB
	TSKU		other				0.0142	TGFB1
	JPH2		enzyme				0.0142	SLC8A1
	PTGR2		enzyme				0.0142	FABP4
	S100A14		other				0.0142	MMP2
	nitecapone		chemical reagent				0.0142	TGFB1
	AZD1981		chemical drug				0.0142	ITGAM
	mubritinib		chemical drug				0.0142	MAF
	TNNC1		other				0.0142	SLC8A1
	GTF2H2		transcription regulator				0.0142	KLF9
	SURF4		other				0.0142	SCD
	LINC00672		other				0.0142	LASP1
	miR-3584-5p (and other miRNAs w/seed GGAGGAG)		mature microRNA				0.0142	NTRK3
	R333		chemical drug				0.0142	MAF
	IFI6		other				0.0142	BCL2L11
	ponatinib		chemical drug				0.0142	DHCR24
	CKAP4		other				0.0142	CCN2
	PIK3R5		kinase				0.0142	PIK3CG
	GLCCI1		other				0.0142	BCL2L11
	Cbr2		enzyme				0.0142	FABP4
	SPOCK1		other				0.0142	MMP2
	PTPN9		phosphatase				0.0142	MMP2
	serelaxin		biologic drug				0.0142	TGFB1
	ADCY3		enzyme				0.0142	NRP1
	(R)-PFI-2		chemical reagent				0.0142	CCN2
	CTD_2245E153		other				0.0142	PC
	A-770041		chemical drug				0.0142	PLCG2
	ketone body		chemical - endogenous mammalian				0.0142	CYP2E1
	dihydrotetrabenazine		chemical drug				0.0142	TGFB1
	fosfomycin		chemical drug				0.0142	PTAFR
	2,4-dichlorobenzamil		chemical reagent				0.0142	CCN2
	D-lactic acid		chemical - endogenous mammalian				0.0142	ITGAM
	daclizumab		biologic drug				0.0142	MAF
	P505-15		chemical drug				0.0142	PLCG2
	4-cresol		chemical toxicant				0.0142	ITGAM
	2,5-dihydroxybenzoic acid		chemical - endogenous mammalian				0.0142	ABCG1
	sodium hypochlorite		chemical drug				0.0142	APEX1
	anti-miR-222 inhibitor		chemical reagent				0.0142	CCN2
	anti-miR-221 inhibitor		chemical reagent				0.0142	CCN2
	18-hydroxy-retinoic acid		chemical - endogenous mammalian				0.0142	ITGAX
	(des-Arg10,Leu9)-kallidin		chemical reagent				0.0142	CCN2
	podophyllotoxin		chemical drug				0.0142	CCN2
	prostanoid		chemical drug				0.0142	ENTPD1
	BX-912		chemical drug				0.0142	ITGAM
	beta-tocopherol		chemical - endogenous mammalian				0.0142	CCN2
	G protein q		complex				0.0142	RCAN1
	8-bromoguanosine 3',5'-cyclic monophosphate		chemical reagent				0.0144	CD8A,ITGAM,TGFB1
	AKT inhibitor VIII		chemical reagent				0.0144	BCL2L11,CD28,MMP2
	arginine		chemical - endogenous mammalian				0.0144	CYP2E1,SCD,TGFB1
	miR-92a-3p (and other miRNAs w/seed AUUGCAC)		mature microRNA				0.0144	BCL2L11,OSBPL8,ZEB2
	amiodarone		chemical drug				0.0144	ASAH1,MYH6,SCD
	CD3E		transmembrane receptor				0.0146	CD3G,CD8B,LCP2,PIK3CG
	ATP-gamma-S		chemical reagent				0.0153	CD300E,CD8A,NRP1,TLR1
	XDH		enzyme				0.0155	ABCG1,CCN2,MMP2
	CTF1		cytokine				0.0155	CEBPD,ENPP2,SERPINA3
	PIK3CD		kinase				0.0155	BCL2L11,MAF,TGFB1
	HOXA9		transcription regulator				0.0157	BCL2L11,CD93,LY86,OSBPL8,RGL1,SDCBP,Tmsb4x (includes others)
	moxonidine		chemical drug				0.0164	ANPEP,TGFB1
	GPRC6A		G-protein coupled receptor				0.0164	ADGRE1,PLIN2
	LOXL1		enzyme				0.0164	MMP12,MMP2
	F10		peptidase				0.0164	CCN2,MMP2
	ZBTB32		transcription regulator				0.0164	CIITA,HLA-DQB1
	BAR501		chemical reagent				0.0164	ADGRE1,TGFB1
	5,8,11,14-eicosatetraynoic acid		chemical reagent				0.0164	CFD,FABP4
	STAT		group				0.0167	CEBPD,PTGER2,SERPINA3
	GDF9		growth factor				0.0167	CCN2,HAS1,PTGER2
	NQO1		enzyme				0.0167	C5AR1,DOCK2,FPR1
	COL4A3		other				0.0167	CCN2,MMP2,TGFB1
	S-adenosylmethionine		chemical - endogenous mammalian				0.0167	CYP2E1,MAF,TGFB1
	Collagen type I (complex)		complex				0.0169	MMP12,MMP2,RECK,TGFB1
	FANCC		other				0.0169	FGFR1,FZD4,FZD9,TBC1D9
	SMARCA2		transcription regulator				0.0177	CIITA,DES,ITGAM,TBX2
	thalidomide		chemical drug				0.0179	ITGAM,NRP1,TGFB1
	KIN001-043		chemical drug				0.0179	IGF2,ITGAM,MMP2
	orotic acid		chemical - endogenous mammalian				0.0188	CYP2E1,SCD
	SELENOS		other				0.0188	CFD,FABP4
	TIMP2		other				0.0188	MMP2,RECK
	PTBP1		enzyme				0.0188	FGFR1,SERPINA3
	SPTLC2		enzyme				0.0188	CCN2,MMP2
	SMC3		other				0.0188	HLA-DQA1,HLA-DQB1
	TBX3		transcription regulator				0.0188	LBH,TBX2
	NHLH2		transcription regulator				0.0188	ADGRE1,UCP2
	ITIH1		other				0.0188	IRF5,TGFB1
	CNOT3		other				0.0188	TNFRSF11A,UCP2
	finerenone		chemical drug				0.0188	IP6K3,TNXB
	24-hydroxycholesterol		chemical - endogenous mammalian				0.0188	ABCG1,ACE
	CIITA	-0.578	transcription regulator				0.0192	HLA-DMB,HLA-DQA1,HLA-DQB1
	ENG		transmembrane receptor				0.0192	CCN2,PTPRJ,TGFB1
	pimagedine		chemical drug				0.0192	CCN2,POU2F2,TGFB1
	TEAD1		transcription regulator				0.0195	CCN2,DES,MYH1,MYH6
	MLXIPL		transcription regulator				0.0195	ACACB,ADGRE1,FABP4,GPD1,ITGAX,SCD
	PP1		chemical drug				0.0205	BCL2L11,MMP2,SIRPA
	RCE1		peptidase				0.0205	PLIN2,SLIT3,TGFBI
	2-chloroadenosine		chemical reagent				0.0213	MMP2,TGFB1
	CSF2RB		transmembrane receptor				0.0213	ADGRE1,ITGAM
	CABIN1		other				0.0213	MMP2,MYH1
	PURA		transcription regulator				0.0213	ITGAM,ITGAX
	NREP		other				0.0213	MMP2,TGFB1
	GPNMB		enzyme				0.0213	NRP1,TNFRSF11A
	FCGR1A		transmembrane receptor				0.0213	ITGAM,ITGB2
	ACACB	0.541	enzyme				0.0213	ACACB,SCD
	spermidine		chemical - endogenous mammalian				0.0213	ITGAM,MMP2
	JAK1		kinase				0.0213	BCL2L11,ENPP2,MMP2,TGFB1
	Brd4		kinase				0.0213	LY86,RASSF2,TLR6,Tmsb4x (includes others)
	HRH3		G-protein coupled receptor				0.0218	CFD,PCOLCE2,SERPINA3
	MALAT1		other				0.0232	BCL2L11,CFD,SPTB
	everolimus		chemical drug				0.0232	CCN2,MMP2,NCEH1
	D-galactosamine		chemical - endogenous mammalian				0.0232	CTSB,CYP2E1,SDC3
	Rxr		group				0.0237	C1QA,CTSB,ITGB2,MMP2,PLIN2
	JAK2		kinase				0.0238	ACE,BCL2L11,ENPP2,ITGAM,SLC11A1,SPTB
	NRP1	-0.529	transmembrane receptor				0.0239	HLA-DQB1,RCAN1
	THY1		other				0.0239	MMP2,TGFB1
	CCAT2		other				0.0239	TGFB1,ZEB2
	C5		other				0.0239	C5AR1,ITGB2
	DIM-C-pPhOH-3-Cl-5-OCH3		chemical reagent				0.0239	CCN2,GPD1
	oxysterol		chemical - endogenous mammalian				0.0239	ABCG1,TGFB1
	KIT		transmembrane receptor				0.0245	BCL2L11,C3AR1,ITGAM,ITGAX,ITGB2
	DMP1		other				0.0246	C1QB,CTSW,TMEM267
	DPP4		peptidase				0.0246	FABP4,MMP2,TGFB1
	pembrolizumab		biologic drug				0.0246	CD8A,HAVCR2,HLA-DQA1
	fasudil		chemical drug				0.0246	CCN2,MMP2,TGFB1
	MM-589		chemical reagent				0.0246	MMP2,MYH6,RND1
	estriol		chemical - endogenous mammalian				0.0261	ITGB2,SDC3,TLR6
	Collagen(s)		complex				0.0261	C3AR1,C5AR1,ITGAM
	HNRNPH1		other				0.0261	CYFIP2,GNG2,LASP1
	mannitol		chemical - endogenous mammalian				0.0266	BCL2L11,CCN2
	CYB561A3		enzyme				0.0266	COTL1,FTL
	FZD8		G-protein coupled receptor				0.0266	CCN2,MYH6
	C-21		chemical drug				0.0266	CCN2,TGFB1
	Cyp2c23		enzyme				0.0266	ITGAM,MS4A7
	AKR1B1		enzyme				0.0266	FABP4,MMP2
	ATP2A2		transporter				0.0266	ACACB,SCD
	PARP9		enzyme				0.0266	HLA-DQA1,HLA-DQB1
	CH-223191		chemical reagent				0.0266	ENTPD1,MAF
	isoliquiritigenin		chemical - endogenous non-mammalian				0.0266	CCN2,MMP2
	diphtheria toxin		chemical - endogenous non-mammalian				0.027	C1QA,CLEC4A,CTSW,PLA2G7,TNFRSF11A
	PTC-209		chemical reagent				0.0277	MMP2,MYH6,RND1
	U73122		chemical reagent				0.0277	ITGAM,MAF,MMP2
	RORC		ligand-dependent nuclear receptor				0.028	ACACB,CD28,CYP2E1,DHCR24,LPIN2,SLC16A10
	5,6-epoxyeicosatrienoic acid		chemical - endogenous mammalian				0.0283	FABP4
	8-bromo-cyclic ADP-ribose		chemical reagent				0.0283	TGFB1
	loganin		chemical - endogenous non-mammalian				0.0283	CCN2
	selaginella tamariscina extract		chemical reagent				0.0283	MMP2
	Smad3-Smad4		complex				0.0283	BCL2L11
	NPS		other				0.0283	ITGAM
	Morrbid		other				0.0283	BCL2L11
	pinitol		chemical drug				0.0283	CYP2E1
	GSDMB		other				0.0283	TGFB1
	Integrin alpha V beta 3		complex				0.0283	TGFB1
	RETSAT		enzyme				0.0283	FABP4
	BTBD7		other				0.0283	MMP2
	Pde3		group				0.0283	ENTPD1
	alpha-adrenergic receptor		group				0.0283	SLC8A1
	leteprinim		chemical drug				0.0283	TGFB1
	RNF43		enzyme				0.0283	CYP2E1
	AGO3		translation regulator				0.0283	BCL2L11
	TBX4		transcription regulator				0.0283	TBX2
	Hat		complex				0.0283	SLC8A1
	masitinib		chemical drug				0.0283	DHCR24
	neuropeptide Y		biologic drug				0.0283	UCP2
	HLA-B27		complex				0.0283	HLA-DQA1
	MYO1C		enzyme				0.0283	GSN
	dibromoacetic acid		chemical toxicant				0.0283	IGF2
	RRM1		enzyme				0.0283	DES
	AMD1		enzyme				0.0283	Tmsb4x (includes others)
	miR-509-3p (miRNAs w/seed GAUUGGU)		mature microRNA				0.0283	NTRK3
	PSG1		other				0.0283	TGFB1
	N-acetylcytidine		chemical - endogenous mammalian				0.0283	NLRC4
	potassium nitrate		chemical drug				0.0283	ITGAM
	RCAN2		other				0.0283	MYH1
	CIDEB		other				0.0283	PLIN2
	LAMC2		other				0.0283	MMP2
	TXNDC5		enzyme				0.0283	CTSB
	AGO4		translation regulator				0.0283	BCL2L11
	NPAS3		transcription regulator				0.0283	FGFR1
	LRP1B		transmembrane receptor				0.0283	NCEH1
	MYO9B		enzyme				0.0283	SH2D2A
	CFP		other				0.0283	ITGAM
	VE-821		chemical reagent				0.0283	ITGAM
	FGF5		growth factor				0.0283	FGFR1
	brequinar		chemical drug				0.0283	ITGAM
	DDX20		transcription regulator				0.0283	IGF2
	LOC100359583/Ptma		other				0.0283	BCL2L11
	Gk		kinase				0.0283	SCD
	HUS1		kinase				0.0283	BCL2L11
	GDC-0623		chemical drug				0.0283	BCL2L11
	iberdomide		chemical drug				0.0283	IKZF3
	RK-24466		chemical drug				0.0283	PLCG2
	ethyl methanesulfonate		chemical toxicant				0.0283	CIITA
	U 75302		chemical reagent				0.0283	IRF5
	isoniazid		chemical drug				0.0283	CYP2E1
	KRP-297		chemical drug				0.0283	FABP4
	hexaarginine-neomycin B conjugate		chemical reagent				0.0283	CD8A
	erbstatin		chemical - endogenous non-mammalian				0.0283	HAS1
	cation		chemical - other				0.0283	ITGB2
	SC144		chemical reagent				0.0283	ENPP2
	nexinhib4		chemical reagent				0.0283	ITGAM
	Alocasia cucullata root extract		chemical reagent				0.0283	ITGAM
	all-trans-4-Oxo-retinoic acid		chemical - endogenous mammalian				0.0283	ITGAX
	nucleoside		chemical - endogenous mammalian				0.0283	ITGAM
	C29		chemical reagent				0.0283	TNFRSF11A
	bicarbonate		chemical - endogenous mammalian				0.0283	MYOC
	sulfur		chemical - endogenous mammalian				0.0283	MMP2
	5-thio-D-glucose		chemical reagent				0.0283	TGFB1
	JUND		transcription regulator				0.0285	C1QB,C3AR1,C5AR1,CFD
	berberine		chemical drug				0.0287	CYP2E1,MMP2,SCD,TGFB1,UCP2
	MED13		transcription regulator				0.0293	GPD1,SCD,SLC37A2
	KDR		kinase				0.0293	FABP4,HAVCR2,INPP5D
	TCF7		transcription regulator				0.0293	CD3G,CEBPD,HAVCR2
	GSK2816126		chemical drug				0.0293	IGF2,TNFRSF11A,WIF1
	4-hydroxynonenal		chemical toxicant				0.0293	CCN2,CTSB,TGFB1
	liraglutide		biologic drug				0.0295	ACE,FGFR1
	mir-143		microRNA				0.0295	MMP2,OSBPL8
	PCYT2		enzyme				0.0295	ABCG1,SCD
	leuprolide		biologic drug				0.0295	MMP2,TGFB1
	27-hydroxycholesterol		chemical - endogenous mammalian				0.0295	ACE,ANPEP
	fingolimod		chemical drug				0.0297	CCN2,HLA-DQA1,HLA-DQB1,TGFB1
	lysophosphatidylinositol		chemical - endogenous mammalian				0.0309	FABP4,FPR1,PLCE1
	herbimycin		chemical drug				0.0309	CCN2,MMP2,SIRPA
	N-formyl-Met-Leu-Phe		chemical reagent				0.0309	ITGAM,ITGB2,SIRPA
	USF1		transcription regulator				0.032	CIITA,TBX2,TGFB1,UCP2
	C9orf72		other				0.0324	NUP210,PC
	STAT3 inhibitor VI		chemical reagent				0.0324	BCL2L11,ENPP2
	mir-218		microRNA				0.0324	FZD4,ZEB2
	FCER1A		transmembrane receptor				0.0324	PLCG2,SIRPA
	FKBP5		enzyme				0.0324	FABP4,UCP2
	HOXD3		transcription regulator				0.0324	MMP2,TGFBI
	elovanoid N32		chemical - endogenous mammalian				0.0324	MMP12,MMP2
	interferon beta-1a		biologic drug				0.0325	FPR1,FYB1,LILRB3,TBXAS1,TLR1
	C/EBP		group				0.0326	ADH1C,PTAFR,TGFB1
	ITGA5		transmembrane receptor				0.0326	ENPP2,IGF2,MMP2
	TWIST2		transcription regulator				0.0326	MAF,TGFB1,ZEB2
	IL11RA		transmembrane receptor				0.0326	MMP12,MMP2,TGFB1
	HNRNPK		other				0.0326	CCN2,Tmsb4x (includes others),UCP2
	ALKBH5		enzyme				0.0333	ASAH1,FGFR1,IGF2,SLC7A8
	roscovitine		chemical drug				0.0343	BCL2L11,CCN2,FABP4
	ALB		transporter				0.0343	CCN2,SCD,TGFB1
	TFE3		transcription regulator				0.0343	CKB,COX7A1,SCD
	cytochalasin D		chemical toxicant				0.0343	CAV3,CCN2,MMP2
	STAT5a/b		group				0.0354	BCL2L11,LCP2,MAF,RFTN1,Tmsb4x (includes others)
	11,12-epoxyeicosatrienoic acid		chemical - endogenous mammalian				0.0355	FABP4,PIK3CG
	LGR5		transmembrane receptor				0.0355	CYP2E1,SLC16A10
	CYP2E1	1.21	enzyme				0.0355	C3AR1,C5AR1
	SOCS6		other				0.0355	CEBPD,SLA
	RND3		enzyme				0.0355	MMP2,UCP2
	tranilast		chemical drug				0.0355	NRP1,TGFB1
	elovanoid N34		chemical - endogenous mammalian				0.0355	MMP12,MMP2
	salvin		chemical toxicant				0.0355	FABP4,ITGAM
	butaprost		chemical drug				0.0355	CCN2,PTGER2
	PLK1		kinase				0.0361	BCL2L11,TGFB1,TGFBI
	CD86		transmembrane receptor				0.0361	CD28,POU2F2,TNFRSF11A
	TIMP3		other				0.0361	MMP2,TGFB1,ZEB2
	candesartan		chemical drug				0.0361	ACE,MMP2,TGFB1
	SB 216763		chemical drug				0.0361	CCN2,MAF,SCD
	mir-30		microRNA				0.0361	BCL2L11,CCN2,KLF9
	ziritaxestat		chemical drug				0.0361	C3AR1,CCN2,FYB1
	PRMT5		enzyme				0.0379	COX7A1,FABP4,WIF1
	TEAD3		transcription regulator				0.0379	CCN2,DES,MYH1
	LRP1		transmembrane receptor				0.0379	ADGRE1,MMP2,PLIN2
	NOX4		enzyme				0.0379	BCL2L11,DES,MMP2
	advanced glycation end-products		chemical - endogenous mammalian				0.0379	ABCG1,CCN2,TGFB1
	Tnf receptor		group				0.0387	CCN2,TGFB1
	ACSS2		enzyme				0.0387	DHCR24,SCD
	CCN3	0.703	growth factor				0.0387	CCN2,MMP2
	CYP27A1		enzyme				0.0387	ABCG1,ANPEP
	probucol		chemical drug				0.0387	CCN2,TGFB1
	CCN5		growth factor				0.0397	CCN2,FABP4,TGFB1
	FHL2		transcription regulator				0.0397	ADGRE1,BCL2L11,TGFB1
	SREBF2		transcription regulator				0.0397	CCN2,LIPA,PLIN2,SCD
	TCF		group				0.0411	APOD,DPEP1,MMP2,SERPINA3
	betamethasone		chemical drug				0.042	CCN2,CCN3
	ORMDL3		other				0.042	ADAM8,TGFB1
	oxymatrine		chemical drug				0.042	ACE,TGFB1
	DEF6		other				0.042	MMP2,ZEB2
	miR-18a-5p (and other miRNAs w/seed AAGGUGC)		mature microRNA				0.042	BCL2L11,CCN2
	ACTB		other				0.042	Ppp1r12b,SLC11A1
	RAPGEF3		other				0.042	BCL2L11,TGFB1
	SCGB1A1		cytokine				0.042	ITGB2,MMP2
	dipyridamole		chemical drug				0.042	MMP2,TGFB1
	Ro41-5253		chemical reagent				0.042	APOD,FABP4
	Zn2+		chemical - endogenous mammalian				0.042	BCL2L11,MMP12
	4-CMTB		chemical reagent				0.0421	FABP4
	BI113823		chemical reagent				0.0421	MMP2
	brivudine		chemical drug				0.0421	APEX1
	ergosterol-5,8-peroxide		chemical - endogenous mammalian				0.0421	CCN2
	stigmasterol		chemical - endogenous mammalian				0.0421	ABCG1
	hyodeoxycholic acid		chemical - endogenous mammalian				0.0421	ABCG1
	NONMMUG036351		other				0.0421	FABP4
	L-kynurenine		chemical - endogenous mammalian				0.0421	NCR1
	Ggtase I		complex				0.0421	CCN2
	monooleylphosphatidic acid		chemical - endogenous mammalian				0.0421	ENPP2
	AMOT		other				0.0421	CCN2
	chlormethiazole		chemical drug				0.0421	TGFB1
	G protein beta gamma		complex				0.0421	CCN2
	4-vinylcyclohexene		chemical reagent				0.0421	CYP2E1
	tolylfluanid		chemical toxicant				0.0421	SCD
	gliquidone		chemical drug				0.0421	FABP4
	fluoroquinolone		chemical drug				0.0421	MMP2
	dietary fat derivative		chemical drug				0.0421	ITGAM
	IGF2-AS		other				0.0421	IGF2
	TMBIM1		other				0.0421	MMP2
	CNPY3		other				0.0421	TLR1
	DERL1		other				0.0421	MMP2
	Fascin		group				0.0421	CCN2
	PSMD14		peptidase				0.0421	BCL2L11
	LAPTM4B		other				0.0421	TGFB1
	Integrin alpha 3 beta 1		complex				0.0421	MMP2
	2-(3-chlorophenylamino)phenylacetic acid		chemical drug				0.0421	TGFB1
	HDGF		growth factor				0.0421	TGFB1
	ESRP2		other				0.0421	ZEB2
	AMOTL1		other				0.0421	CCN2
	Miat	0.817	other				0.0421	TGFB1
	Ikk (family)		group				0.0421	HAS1
	Eotaxin		group				0.0421	ITGAM
	Syk inhibitor		chemical drug				0.0421	MMP12
	pimasertib		chemical drug				0.0421	BCL2L11
	foretinib		chemical drug				0.0421	BCL2L11
	LINC00665		other				0.0421	MMP2
	recombinant interferon gamma		biologic drug				0.0421	CLEC4A
	CLCN3		ion channel				0.0421	TGFB1
	miR-485-3p (and other miRNAs w/seed UCAUACA)		mature microRNA				0.0421	NTRK3
	Tardbp		transcription regulator				0.0421	FGFR1
	MARK4		kinase				0.0421	CCN2
	SLC3A2		transporter				0.0421	CCN2
	HSPA4		other				0.0421	TGFB1
	FTMT		enzyme				0.0421	FTL
	INPP5K		phosphatase				0.0421	IGF2
	sulfurbutylether-beta-cyclodextrin		chemical reagent				0.0421	ABCG1
	S100A1		other				0.0421	SLC8A1
	LSS		enzyme				0.0421	ABCG1
	GJC1		ion channel				0.0421	TGFB1
	IGF2BP3		translation regulator				0.0421	IGF2
	LYPD6		other				0.0421	FZD4
	PAGR1		other				0.0421	CEBPD
	MYOZ2		other				0.0421	RCAN1
	RBFOX1		other				0.0421	GSN
	ITGAD		other				0.0421	CD28
	A-66		chemical reagent				0.0421	TGFB1
	CMYA5		other				0.0421	MYH1
	EXOC7		transporter				0.0421	ZEB2
	BR-4628		chemical reagent				0.0421	CCN2
	N6-carboxymethyl-lysine bovine serum albumin		chemical reagent				0.0421	TGFB1
	temocapril		chemical reagent				0.0421	ACE
	chloroform		chemical toxicant				0.0421	CYP2E1
	pyridine		chemical - endogenous mammalian				0.0421	CYP2E1
	epalrestat		chemical drug				0.0421	TGFB1
	saccharin		chemical reagent				0.0421	FABP4
	triphenyltin		chemical toxicant				0.0421	FABP4
	albendazole		chemical drug				0.0421	MMP12
	ropivacaine		chemical drug				0.0421	ITGAM
	nexinhib20		chemical reagent				0.0421	ITGAM
	menin-MLL inhibitor 2		chemical reagent				0.0421	ABCG1
	(Ala9)-autocamtide-2		biologic drug				0.0421	MMP2
	physostigmine		chemical drug				0.0421	ITGAM
	latanoprost		chemical drug				0.0421	MMP2
	E64		chemical - endogenous non-mammalian				0.0421	MMP2
	N(6)-carboxymethyl-L-lysine		chemical - endogenous mammalian				0.0421	CCN2
	fosinopril		chemical drug				0.0421	ACE
	alefacept		biologic drug				0.0436	CD8A,NCR1,TGFB1
	MOG		other				0.0436	C5AR1,CIITA,TGFB1
	LPL		enzyme				0.0436	FABP4,TGFB1,UCP2
	TFEB		transcription regulator				0.0436	CTSB,GNS,HEXA
	pyridaben		chemical toxicant				0.0436	CEBPD,PLCE1,SLC8A1
	AKT2		kinase				0.0436	BCL2L11,IGF2,TGFB1
	IGFBP2		other				0.0436	ARRB2,MMP2,NUP210
	SAFB		other				0.0436	CCN3,HEXA,TBX2
	SULF2		enzyme				0.0454	MMP2,TGFB1
	UHRF2		enzyme				0.0454	BCL2L11,CKB
	TINCR		other				0.0454	FTL,MMP2
	resolvin D2		chemical - endogenous mammalian				0.0454	IRF5,ITGB2
	FBN1		other				0.0454	CCN2,MMP2
	RLN2		other				0.0454	MMP2,TGFB1
	RBP4		other				0.0454	ITGAX,TGFB1
	ammonium chloride		chemical drug				0.0454	CTSB,RCAN1
	SB 290157		chemical reagent				0.0454	ADGRE1,C3AR1
	KL		enzyme				0.0456	CCN2,MMP2,TGFB1
	VEGFB		growth factor				0.0456	BCL2L11,MMP12,MYH6
	mir-24		microRNA				0.0456	BCL2L11,MAF,TGFB1
	hexachlorobenzene		chemical toxicant				0.0476	FBLIM1,MMP2,RFTN1
	IL32		cytokine				0.0476	ITGAM,ITGB2,MMP2
	CD5		transmembrane receptor				0.0476	IL10RB,SIPA1,TGFB1
	NCOR-LXR-Oxysterol-RXR-9 cis RA		complex				0.0489	ABCG1,SCD
	Smad		complex				0.0489	CCN2,INPP5D
	Relaxin		group				0.0489	HAS1,MMP2
	Nppb		other				0.0489	ACE,GNG2
	LRPAP1		other				0.0489	MMP2,SERPINA3
	amitriptyline		chemical drug				0.0489	ASAH1,SERPINA3
	tosylphenylalanyl chloromethyl ketone		chemical - protease inhibitor				0.0489	MMP2,PLCG2
	trichloroethylene		chemical toxicant				0.0497	ANPEP,CYP2E1,DHCR24
	APOA1		transporter				0.0497	ITGAM,PTGIS,TGFB1
	IRF6		transcription regulator				0.0497	ENPP2,P2RX4,RCAN1
	benzene		chemical toxicant				0.0497	ANPEP,CYP2E1,DHCR24
	levodopa		chemical - endogenous mammalian	Activated	3.79		4.86e-07	ARHGAP4,ARRB2,C1QA,CAP1,CHST11,COTL1,CTSB,FES,FTL,GNS,GPD1,HEXA,INSYN2B,KLF9,LAPTM5,LASP1,NTRK3,P2RY6,PIK3CG,PLCG2,PLD4,PLEKHA2,PLEKHO2,PTGIS,SKAP1,ST3GAL5,WIPF1,ZEB2
	IL10RA		transmembrane receptor	Activated	2.891		0.00188	ABCG1,ADH1C,CCN3,CYFIP2,DPEP1,Gbp8,ITGAM,PARVG,SIRPB1,SLAMF6,SPON1,TGFB1
	miR-1-3p (and other miRNAs w/seed GGAAUGU)		mature microRNA	Activated	2.815	bias	0.00641	ANPEP,CAP1,CERS2,CHST11,LASP1,NRP1,PREX1,Tmsb4x (includes others)
	miR-155-5p (miRNAs w/seed UAAUGCU)		mature microRNA	Activated	2.739	bias	0.00268	BCL2L11,FGD4,INPP5D,MAF,PTPRJ,SDCBP,SLA,TM6SF1
	RET		kinase	Activated	2.646		0.000279	ANXA4,CCN3,CTSB,DES,MAF,MYH6,MYO18B,SCARA3,TBX2
	dexamethasone		chemical drug	Activated	2.519		4.37e-12	ACE,ANPEP,APOD,ARHGAP25,ARRB2,ATP1A3,BCL2L11,C1QB,C3AR1,C5AR1,CCN2,CCN3,CD226,CD8B,CEBPD,CFD,CILP,CORO2A,COX7A1,CPE,CRHR2,CTSB,CTSW,CYP2E1,DHCR24,ENTPD1,FABP4,FGD4,FTL,FZD4,GNS,HAVCR2,HLA-DMB,HLA-DQB1,IGF2,IGFBP6,IP6K3,IRF5,ITGA10,ITGAM,KLF9,LAMA2,LAMB2,LAPTM5,LPIN2,LTBP4,MAF,MMP12,MMP2,MYH6,MYOC,NAIP,NLRC4,NPR2,PC,PILRA,PLD4,PLIN2,PTAFR,PTGER2,RASD1,RCAN1,RNF128,SCARA5,SCD,SERPINA3,SLA,SLC8A1,SP…	150 (15)
	IKZF1		transcription regulator	Activated	2.424		0.00344	CD8A,FGFR1,FLI1,LGMN,LHFPL2,LILRB3,P2RX4,POU2F2,RASSF4,TBC1D9
	STAT5B		transcription regulator	Activated	2.345		0.000243	CDO1,COX7A1,GPD1,HEXA,KSR1,MAF,MYH1,MYH6,POU2F2,RASD1,SCARA5,SCD,TNFRSF11A
	DSCAM		other	Activated	2.236		0.0116	ARHGAP4,GSN,KLF9,SEMA3E,SFRP4
	miR-34a-5p (and other miRNAs w/seed GGCAGUG)		mature microRNA	Activated	2.236	bias	0.0419	CTSW,IKZF3,PPM1H,PTPN7,THEMIS
	ADIPOQ		other	Activated	2.183		0.000245	ACACB,CCN2,CYP2E1,FABP4,FGFR1,FZD4,FZD9,GPD1,MMP2,SCD,TGFB1,UCP2	141 (21)
	methotrexate		chemical drug	Activated	2.137		0.00855	ACACB,ANXA4,APEX1,C1QB,CD28,FPR1,GSN,SCD,TGFB1	101 (7)
	methylprednisolone		chemical drug	Activated	2.11		0.000392	ANPEP,APEX1,ASAH1,C1QB,CCN2,CTSH,ENPP2,GPD1,IGSF6,INPP5D,KCNAB2,KLF9,LAMB2,LIPA,PC,PLCG2,PLIN2,SERPINA3,SIRPA,TLR1,TLR6	99 (7)
	triamcinolone acetonide		chemical drug	Activated	2.07		0.00307	ADCY7,BCL2L11,ITGA10,KLF9,MYOC,PTPN7,SCD,SERPINA3,ST3GAL5
	butyric acid		chemical - endogenous mammalian	Activated	2.062		1.19e-05	ADGRE1,ALPK2,CAP1,CD300C,DHCR24,FABP4,FES,GSN,IGF2,INPP5D,ITGAM,MMP12,NRP1,POU2F2,PTAFR,PTPN7,SIPA1,TGFB1,TGFBI,UCP2	121 (11)
	IL15RA		transmembrane receptor	Activated	2		0.000241	CD226,CD84,ITGAX,NCR1	28 (3)
	IDR-1002		chemical reagent	Activated	2		0.000937	C3AR1,PTAFR,PTGER2,SLC11A1
	CCN1		other	Activated	2		0.00773	BCL2L11,IL10RB,MMP2,TGFB1,WIF1	91 (11)
	GPS2		transcription regulator	Activated	2		0.0161	ABCG1,PID1,RGL1,WIPF1
	MXD1		transcription regulator	Activated	2	bias	0.0285	CIITA,HAVCR2,ITGAX,WDFY4
	B4GALNT1		enzyme		1.982		2.61e-05	C1QA,C1QB,C3AR1,C5AR1
	ST8SIA1		enzyme		1.982		0.000199	C1QA,C1QB,C3AR1,C5AR1
	TARDBP		transcription regulator		1.982		0.0204	BCL2L11,C1QA,C1QB,DHCR24
	HIF1A		transcription regulator		1.981		0.0168	ACE,CCN2,CCN3,ENTPD1,IGF2,IRF5,ITGB2,MAF,MMP12,MMP2,NCR1,PTGIS,TGFB1,TLR6
	1,25-dihydroxyvitamin D		chemical drug		1.954		0.0073	FGFR1,IGF2,MAPK12,TLR1
	LDB1		transcription regulator		1.807		1.74e-05	AIM2,APOBEC1,CD3G,CD93,CYFIP2,FES,GSN,LHFPL2,LPIN2,NLRP1,PLCG2,PTPRJ,RNPEP,SLC7A8,TGFB1
	LMO2		transcription regulator		1.807		1.81e-05	AIM2,APOBEC1,CD3G,CD93,CYFIP2,FES,GSN,LHFPL2,LPIN2,NLRP1,PLCG2,PTPRJ,RNPEP,SLC7A8,TGFB1
	PRDM1		transcription regulator		1.8		0.00105	ADAM8,AIM2,BCL2L11,CIITA,HLA-DMB,HLA-DQA1,ITGAM,MAF,MYO18B,RASSF2,SCARA5,SERPINA3	82 (5)
	FOXO4		transcription regulator		1.786		9.42e-08	BCL2L11,C1QA,CCN2,DHCR24,FABP4,IL10RB,ITGAM,ITGB2,LCP2,PRCP,SCD,TGFB1	65 (7)
	CCL2		cytokine		1.78		0.000395	ABCG1,CEBPD,FABP4,MMP2,RNF128,SLC11A1,TGFB1	128 (18)
	NOTCH1		transcription regulator		1.769		0.0395	CCN2,CD84,CEBPD,CFD,DES,ITGAM,MMP2,TGFB1
	MAPK14		kinase		1.762		0.00253	ADCY7,CEBPD,IGF2,MYH6,NRP1,SH2D2A,SLC8A1,TGFB1,WIF1	118 (17)
	TGFB2		growth factor		1.758		0.00145	CCN2,CIITA,DES,MMP2,PTAFR,SCD,TGFB1	149 (19)
	Notch		group		1.756		0.00539	ADAP1,ADGRE1,FABP4,MMP2,NFAM1,PLD4,ZEB2
	CG		complex		1.733		0.00349	ADCYAP1R1,CD93,CEBPD,ENPP2,FABP4,FZD4,GM2A,HLA-DQA1,MAF,MMP2,NRP1,PTGER2,RASSF2,SEMA3E,SFRP4	151 (17)
	TAZ		enzyme		1.705		0.0369	BCL2L11,CCN2,COX7A1,ENPP2,LCP1,TGFB1
	fluticasone propionate		chemical drug		1.69		2e-07	ABCG1,ARHGAP25,C1QB,CLEC4A,FABP4,HLA-DMB,HLA-DQA1,KLF9,PCOLCE2,PLIN2,PTGER2,RCAN1,SLA,TGFB1
	isobutylmethylxanthine		chemical toxicant		1.66		0.00418	ACE,CCN2,CEBPD,FABP4,ITGB2,MMP2,PLIN2,SCD,TGFB1	156 (18)
	RXRA		ligand-dependent nuclear receptor		1.637		5.59e-07	ABCG1,ACACB,ADH1C,C1QA,CDO1,CEBPD,CTSB,CTSH,FABP4,FTL,GPD1,IGFBP6,KLF9,MMP12,MMP2,PC,SCD,TGFB1	131 (17)
	TFRC		transporter		1.633		0.00172	BCL2L11,FTL,ITGAM,ITGB2,MMP12,PLD4
	MYF6	0.669	transcription regulator		1.585		2.45e-05	ACACB,CTSB,CTSH,GSN,IGF2,MMP2,MYF6,RECK,TGFB1	38 (6)
	aldosterone		chemical - endogenous mammalian		1.569		0.0435	ACE,CCN2,FABP4,IP6K3,MMP2,TGFB1
	FGF1		growth factor		1.561		0.0109	ADGRE1,CCN2,FGFR1,ITGAM,ITGAX,TGFB1
	PPARGC1B		transcription regulator		1.546	bias	0.000565	ACACB,CKB,COX7A1,DHCR24,MYH6,SCD
	PSEN1		peptidase		1.539		0.000619	ABCG1,ATP1A3,C1QA,C1QB,C3AR1,CAP1,CKB,CYFIP2,ENPP2,FZD4,GNG2,IRF5,KCNAB2,TGFB1,TNXB	95 (8)
	CHUK		kinase		1.533	bias	0.00359	CCN3,CEBPD,CTSB,ENPP2,GM2A,IGFBP6,MMP2,MYH1,RCAN1	135 (14)
	PSEN2		peptidase		1.51		0.000114	C1QA,C1QB,C3AR1,CAP1,ENPP2,FZD4,KCNAB2,TNXB
	NR0B2		ligand-dependent nuclear receptor		1.48		0.000479	CARD11,CCN2,FGFR1,PIK3CG,PLCG2,SCD,TGFB1,TNFRSF11A	96 (12)
	mir-21		microRNA		1.477		0.00783	CD226,Gbp8,INPP5D,MMP2,RAB7B,RECK,SIRPB1,SLC16A10,TGFB1,TLR1	64 (12)
	MAPK8		kinase		1.455		0.0465	APOD,BCL2L11,CCN2,MMP2,NRP1,SH2D2A
	tacrolimus		chemical drug		1.44		3.16e-06	APOD,BCL2L11,CD8B,CORO2A,FABP4,GNPDA1,LBH,MAF,NRP1,PLIN2,PTGER2,PTPRJ,SDC3,SDCBP,TMEM100	102 (8)
	MYOD1		transcription regulator		1.433		0.000274	ACACB,ADCY7,CAV3,CDO1,DES,ENPP2,IGF2,MMP2,MYF6,MYH6,RECK,TGFB1	91 (17)
	GW9662		chemical reagent		1.432		0.0154	CCN2,FABP4,PLIN2,TGFB1,UCP2
	SMARCA5		transcription regulator		1.414		0.000532	ATP8B4,CD93,CORO2A,GM2A,IKZF3,PLCG2,THEMIS,WDFY4
	prednisolone		chemical drug		1.414		0.0252	CEBPD,CTSB,CYGB,GM2A,ITGAM,KLF9,PIK3CG,TGFB1
	miR-141-3p (and other miRNAs w/seed AACACUG)		mature microRNA		1.399	bias	0.0223	BCL2L11,MMP2,RNF128,ZEB2
	Bvht		other		1.387	bias	0.00434	CYGB,IGF2,MYH6,SLC8A1,TBX2
	IL6R		transmembrane receptor		1.387		0.00773	IGF2,MMP2,SERPINA3,TGFB1,TNFRSF11A	137 (17)
	bucladesine		chemical toxicant		1.383		0.000785	C3AR1,C5AR1,CD8A,FGFR1,HAS1,IGF2,IGFBP6,ITGB2,KCNAB2,MACROD1,MMP2,PTGER4,TGFB1,ZEB2	146 (17)
	alitretinoin		chemical drug		1.371		1.83e-05	ABCG1,ACACB,APOD,ATP1A3,FABP4,ITGAM,MYH6,Naip1 (includes others),PTGIS,SCD,TGFB1	118 (16)
	geldanamycin		chemical drug		1.37		0.0084	ARRB2,CEBPD,CIITA,FGFR1,HLA-DQA1,IRF5,LBH,SDCBP,SLC16A10,ZC3H12D	95 (8)
	ciglitazone		chemical drug		1.348		0.000954	ABCG1,CIITA,DES,GPD1,GSN,MMP2,PTGER2,PTGER4	115 (12)
	SIRT1		transcription regulator		1.343		0.00192	ABCG1,ACAP1,ANXA4,FABP4,FGFR1,HLA-DQA1,HLA-DQB1,LAMA2,LAPTM5,MMP2,NAIP,PC,SDCBP,SFRP4,UCP2	127 (14)
	camptothecin		chemical drug		1.342		8.22e-06	ANXA4,ARRB2,CD300C,CD93,CHST11,FES,FLI1,FPR1,HLA-DQA1,HLA-DQB1,LAMB2,NCR1,NLRP1,NRP1,P2RX4,PIK3CG,PINK1,PLIN2,PTGER2,PTGER4,SIPA1,TGFB1,TGFBI,TLR6	110 (7)
	CLEC4G		other		1.342		0.0013	CCN2,FZD4,IGF2,SFRP4,TGFB1
	NR1H3		ligand-dependent nuclear receptor		1.324		3.21e-05	ABCG1,ADGRE1,APOD,C1QA,CD300E,FPR1,GRAP2,ITGAM,LCP2,LY86,SCD,SLC16A10,TLR1	78 (6)
	THRB		ligand-dependent nuclear receptor		1.316		2.77e-08	ATP1A3,CFD,COX7A1,CTSH,FABP4,FGFR1,FZD4,FZD9,GSN,HLA-DMB,KLF9,MMP2,MYH6,PTAFR,SFRP4,SLC25A45,TGFB1,TGFBI,WIF1	139 (17)
	WT1		transcription regulator		1.309		0.034	ANPEP,CCN2,FGFR1,GSN,IGF2,ITGAM,MMP2,TGFB1
	Nr1h		group		1.305		0.0252	ABCG1,ACACB,ACE,APOD,SCD,SLC8A1
	D-glucose		chemical - endogenous mammalian		1.283		0.000435	ABCG1,ACE,ART3,BCL2L11,CAP1,CCN2,CTSB,CYP2E1,DES,ENPP2,GPD1,GSN,IGF2,LCP1,MMP2,PC,PINK1,PTGIS,SCD,SLC25A4,SLC8A1,TGFB1,UCP2	145 (20)
	STAT3		transcription regulator		1.282		3.58e-05	APEX1,BCL2L11,C5AR1,CCN2,CD226,CEBPD,CIITA,CTSB,ENPP2,HLA-DQA1,IGF2,IKZF3,IRF5,ITGAM,ITGB2,MAF,MMP12,MMP2,MYF6,NRP1,PTAFR,SERPINA3,TGFB1,WIPF1	148 (18)
	NR1H2		ligand-dependent nuclear receptor		1.281		0.016	ABCG1,ACE,ITGAX,SCD,SLC16A10
	AGT		growth factor		1.23		3.38e-08	ACE,ADAM8,ADGRE1,ADH1C,C5AR1,CAV3,CCN2,CCN3,CD300C,CILP,COX7A1,CPE,CYP2E1,ITGAX,ITGB2,LAMB2,LIMD2,LTBP4,Miat,MMP12,MMP2,MYH6,PI16,PREX1,PTGIS,RCAN1,SERPINA3,SFRP4,SLC8A1,SLIT3,TBX2,TGFB1,TLR1,UCP2,WIF1,ZEB2	135 (16)
	GHRL		growth factor		1.183		0.0223	ABCG1,MYF6,SCD,UCP2
	IL15		cytokine		1.178		0.000399	BCL2L11,CCN2,CD226,CD28,CD84,CD8A,CD8B,CTSW,FYB1,HAVCR2,ITGAX,MAF,MYH1,NCR1,P2RY6,PLCG2,PTPRJ	104 (7)
	fenofibrate		chemical drug		1.166		0.0381	ACACB,APEX1,BCL2L11,FABP4,PTAFR,SCD,TGFB1,UCP2
	INSR		kinase		1.165		0.0149	C1QA,CCN2,CTSB,DDR2,DES,FABP4,IGF2,KLF9,LCP1,MMP12,MMP2,SCD,SLC25A4,TGFB1,UCP2
	GABA		chemical - endogenous mammalian		1.155	bias	0.0204	ADH1C,ASAH1,DHCR24,GM2A,HEXA,IL10RB,MMP2,PC,PLA2G12A,ST3GAL5,TGFB1,Tmsb4x (includes others)
	ZBTB7B		transcription regulator		1.154		0.00387	CD8A,CD8B,COX7A1,MAF,NRP1
	MIF		cytokine		1.149		0.0397	ADGRE1,C3AR1,CD84,MMP2,TGFB1
	RETNLB		other		1.134	bias	0.000157	CCN2,FABP4,FGFR1,MAP3K6,MMP12,MMP2,TGFB1	149 (19)
	LGALS3		other		1.131		0.00494	CTSH,ENPP2,FABP4,ITGA10,ITGAM,TGFB1	86 (9)
	FASN		enzyme		1.131		0.0169	ABCG1,CFD,FABP4,SCD
	salicylic acid		chemical drug		1.114		0.00778	CAV3,CCN2,CYP2E1,TGFB1	124 (18)
	PPP3R1		phosphatase		1.109		0.00189	GIMAP4,IKZF3,SCD,SLC8A1,TNFRSF11A
	BMP7		growth factor		1.109		0.0149	CEBPD,COX7A1,IGF2,IGFBP6,MMP2,TGFB1,ZEB2
	PNPLA2		enzyme		1.103		0.0146	ADGRE1,FABP4,ITGAX,UCP2
	hydroxypropyl-beta-cyclodextrin		chemical drug		1.091		0.000724	ABCG1,CTSB,ITGAX,LIPA	30 (3)
	mir-221		microRNA		1.091		0.00149	CCN2,MAF,MMP2,ZEB2
	mir-133		microRNA		1.091	bias	0.0177	CCN2,CERS2,FTL,LASP1
	LIPE		enzyme		1.067		8.24e-05	ADH1C,CDO1,FABP4,HLA-DQA1,INMT,PC,PLIN2,SCD,ST3GAL5	35 (6)
	IL1RL1		transmembrane receptor		1.067		0.000724	CD28,ITGAM,PINK1,TLR1	94 (7)
	CNTF		cytokine		1.067		0.0012	CEBPD,ENPP2,FGFR1,SCD,SERPINA3,TGFB1	114 (11)
	YBX1		transcription regulator		1.067		0.00325	FGFR1,HLA-DQB1,IRF5,MMP2,SPON1,TGFB1	156 (18)
	TRAF3IP2		enzyme		1.067	bias	0.00387	ACE,CCN2,CEBPD,MMP2,TGFB1	145 (18)
	MSC		transcription regulator		1.067		0.0131	FABP4,FLI1,HAVCR2,POU2F2
	ursodeoxycholic acid		chemical - endogenous mammalian		1.067		0.0161	CCN2,CYP2E1,MAF,TGFB1
	GDF2		growth factor		1.067	bias	0.0425	ENPP2,NRP1,SEMA3B,TMEM100
	troglitazone		chemical drug		1.051		0.00144	ABCG1,CEBPD,CFD,CIITA,COX7A1,FABP4,GPD1,PC,PLIN2,RASD1,SCD,TBXAS1,TGFB1,UCP2	143 (20)
	atorvastatin		chemical drug		1.037		0.0047	ABCG1,CCN2,DHCR24,ITGB2,MMP2,TGFB1,TMEM106A,TMEM267,TNFRSF11A	95 (14)
	TGFBR2		kinase		1.028		0.0034	ADAM8,ADGRE1,C5AR1,CCN2,CKB,FPR1,ITGAM,MMP12,MMP2,NRP1,PTGIS,TBXAS1,TGFB1	148 (17)
	bleomycin		biologic drug		1.023	bias	0.0101	CCN2,FABP4,FGFR1,MAP3K6,MMP12,MMP2,PTGER2,TGFB1
	acetaldehyde		chemical - endogenous mammalian		1		0.000199	DDR2,KLF9,MMP2,TGFB1	100 (8)
	NORAD		other		1	bias	0.0027	CCN2,CHST11,PHLDB1,SLIT3
	KITLG		growth factor		1	bias	0.00406	BCL2L11,CCN2,CD3G,DHCR24,FGFR1,LAPTM5,MMP2,RNF128,Tmsb4x (includes others),UCP2	108 (17)
	PF543		chemical drug		1	bias	0.00555	CCN2,ITGAX,TGFB1,TLR1
	EPHB4		kinase		1		0.00778	IGF2,MYF6,TBX2,TGFB1
	mono-(2-ethylhexyl)phthalate		chemical toxicant		1	bias	0.0303	ACACB,APOBEC1,FABP4,GPD1,PC,PLIN2
	FOXO3		transcription regulator		0.98		0.000506	APEX1,BCL2L11,C1QA,CCN2,CTSB,FABP4,IL10RB,ITGAM,ITGB2,LCP2,NRP1,PRCP,TGFB1,UCP2	143 (17)
	bezafibrate		chemical drug		0.98		0.0126	ACACB,APEX1,FABP4,SCD,UCP2
	bexarotene		chemical drug		0.97		0.00681	CFD,CTSH,FABP4,IGFBP6,MAF,SCD,TGFB1,UAP1	142 (20)
	Tcf7		transcription regulator		0.943		1.85e-05	CPE,DHCR24,GM2A,IKZF3,INPP5D,MAF,MAPK12,Naip1 (includes others),OSBPL8,PTGER2,TGFB1,TLR1,ZC3H12D
	IKBKG		kinase		0.943		0.00398	CEBPD,CTSB,ENPP2,GM2A,IGFBP6,MYH6,RCAN1	126 (13)
	GPER1		G-protein coupled receptor		0.928	bias	0.000209	ASAH1,CCN2,CEBPD,PTGER4,RASD1,RND1	132 (14)
	mir-142		microRNA		0.927		0.00829	CD93,ITGAX,NRP1,SLAMF6
	FGF7		growth factor		0.926		0.000864	CEBPD,FGFR1,MMP2,PTAFR,SCD,TGFB1	82 (11)
	MTA1		transcription regulator		0.9		0.00445	APEX1,MMP2,MYH6,SLC16A10
	prostaglandin E2		chemical - endogenous mammalian		0.896		1.72e-06	ABCG1,BCL2L11,C5AR1,CCN2,CD226,CD300E,CEBPD,ENTPD1,FBXO31,ITGAM,MMP2,NCR1,NRP1,PIK3CG,PTGER2,PTGER4,RASGEF1B,TGFB1,UCP2	122 (15)
	THRA		ligand-dependent nuclear receptor		0.895		6.35e-05	CTSB,CTSH,DES,FGFR1,FZD9,KLF9,MYH1,MYH6,PTAFR,TGFB1	72 (12)
	IGF1R		transmembrane receptor		0.894		0.00411	BCL2L11,CD300C,CD84,CD93,DES,IGF2,ITGAM,LASP1,SCARA5,TGFB1,TGFBI	134 (19)
	SMAD3		transcription regulator		0.887		0.000874	BCL2L11,CCN2,CIITA,DES,INPP5D,MMP12,PC,PTP4A3,SLC25A4,SPON1,TGFB1,ZEB2	141 (13)
	PIK3CG	-0.463	kinase		0.882		0.000139	BCL2L11,CD8A,CTSW,Gbp8,Klre1,PIK3CG,TGFB1,TLR1
	ERK		group		0.877		0.00298	BCL2L11,CCN2,CEBPD,FABP4,HAS1,ITGAM,ITGB2,MMP2,RAB7B,RECK	114 (14)
	FGF2		growth factor		0.87		0.00629	ACE,ANPEP,CCN3,CYGB,DES,ENPP2,FABP4,FGFR1,IGF2,MACROD1,MMP2,SCD,TGFB1,Tmsb4x (includes others),ZEB2	138 (17)
	MEF2C		transcription regulator		0.87		0.0125	CKB,DES,MMP12,MYH1,MYH6,SLC8A1
	SNAI1		transcription regulator		0.832		0.00789	CCN2,DDR2,GSN,LASP1,TGFB1,WIPF1,ZEB2	102 (10)
	KDM1A		enzyme		0.816		4.27e-09	APOBEC1,AU020206,C1QB,C3AR1,CD84,CIITA,DDR2,DOCK2,GALNT15,HLA-DQA1,HLA-DQB1,IKZF3,ITGAX,ITGB2,KCNAB2,LCP1,LY86,LY9,Plscr2,SCD,SFRP4,SLC37A2,UCP2
	RGS2		enzyme		0.816		0.00294	ANXA4,CEBPD,FABP4,FBLIM1,RCAN1,SLC7A8
	PSMB11		peptidase		0.816	bias	0.00842	CD28,ITGAM,LAMB2,MAPK12,PIK3CG,TNFRSF11A
	beta-estradiol		chemical - endogenous mammalian		0.815		3.53e-08	ACE,ADH1C,ANPEP,ANXA4,APEX1,APOD,ARRB2,ART3,ASAH1,BCL2L11,CCN2,CCN3,CEBPD,CFD,CKB,CRHR2,CTSB,CTSH,CYP2E1,DHCR24,ENPP2,FABP4,FGD6,FGFR1,GM2A,GNS,GSN,HLA-DQA1,IGF2,IGFBP6,IGSF6,IP6K3,ITGB2,KLF9,Klre1,LAMA2,LAMB2,LAPTM5,LGMN,LHFPL2,LIPA,MAF,MICOS10-NBL1/NBL1,MMP2,MYH6,NCR1,NRP1,NTRK3,P2RY6,PINK1,PLIN2,PPT1,PTGER2,PTGER4,PTGIS,RASD1,RND1,RNF128,SDC3,SEMA3B,SERPINA3,SFRP4,SLA,SLC7A8,SLC8A1,SPOCK2,TBC1…	178 (15)
	Pkc(s)		group		0.807		8.36e-05	BCL2L11,CCN2,CTSB,CYP2E1,DES,FABP4,IGF2,LIPA,MMP2,POU2F2,TGFB1,TNFRSF11A	135 (18)
	filgrastim		biologic drug		0.806		0.00457	ARHGAP25,ATP1A3,CTSW,GNS,HLA-DMB,HLA-DQB1,ITGAM,KLF9,MMP12,NAIP,NLRC4,PILRA,PLD4,PTGER2
	IL1B		cytokine		0.775		0.00309	ACE,ADAM8,ANXA4,CCN2,CEBPD,CIITA,CTSB,CYP2E1,ENPP2,FERMT3,GM2A,HAS1,HEXA,IGFBP6,IKZF3,ITGAM,LCP1,MMP12,MMP2,NRP1,PTGIS,RCAN1,SERPINA3,SLC25A4,TGFB1,TNFRSF11A,UAP1	140 (16)
	LY294002		chemical drug		0.768	bias	1.19e-05	ADH1C,ANPEP,ART3,BCL2L11,CCN2,CYP2E1,DHCR24,ENTPD1,GPD1,HAVCR2,IGF2,ITGAM,MAF,MMP2,NTRK3,P2RY6,PTGER2,PTPRJ,RASSF2,SCD,SLA,TGFB1	140 (17)
	SRF		transcription regulator		0.766		0.00185	BCL2L11,CAP1,CCN2,CEBPD,DES,GSN,ITGAM,LBH,MYH1,MYH6,NLRP1,SLC8A1,TBXAS1	111 (6)
	RARA		ligand-dependent nuclear receptor		0.765		0.0161	ACACB,ADH1C,CD84,CD93,FGFR1,IGFBP6,NRP1,PHLDB1,PIK3CG,RASD1,TGFB1
	androgen		chemical drug		0.762		0.0118	APOD,CTSB,DHCR24,FES,GSN,ITGAM,WIF1
	IKBKB		kinase		0.758		0.00327	CCN2,CEBPD,CTSB,ENPP2,GM2A,HAS1,IGFBP6,MMP2,RCAN1,TGFB1,Tmsb4x (includes others)	150 (19)
	CCN2	0.604	growth factor		0.753		0.00494	CCN2,CCN3,IGF2,MMP2,SFRP4,TGFB1	141 (18)
	(5-(4-N-methyl-N(2-pyridyl)amino)ethoxy)benzyl thiazolidine-2,4-dione		chemical reagent		0.739		1.35e-07	FABP4,ITGAM,MMP12,PC,SCD
	histone deacetylase inhibitor		chemical drug		0.728		0.00184	BCL2L11,GSN,RECK,TGFB1	127 (12)
	PDGF BB		complex		0.72		0.000336	CCN2,CDO1,CEBPD,FGFR1,IGF2,LAMB2,MICOS10-NBL1/NBL1,MMP12,MMP2,MYH1,PLCG2,SCD,SERPINA3,TGFB1	135 (18)
	dimethyl sulfoxide		chemical drug		0.714		0.0386	CYP2E1,ITGAM,ITGB2,MYH6,WIF1
	MAP3K8		kinase		0.692		0.00666	ADCY7,CEBPD,CIITA,NFAM1,PTGER2,PTGER4,SLA
	15-deoxy-delta-12,14 -PGJ 2		chemical - endogenous mammalian		0.667		0.00771	CCN2,CEBPD,CIITA,CTSB,DES,FABP4,GSN,ITGAM,TBXAS1	145 (19)
	5-N-ethylcarboxamido adenosine		chemical reagent		0.655		0.00138	CCN2,CEBPD,CIITA,HLA-DQA1,HLA-DQB1,NRP1,TGFB1	133 (16)
	NFATC2		transcription regulator		0.651		0.0299	BCL2L11,CD3G,ENPP2,MAF,RCAN1,SLAMF6,TGFB1
	estrogen		chemical drug		0.64		0.00941	ART3,CCN2,CKB,DPEP1,IGF2,IGFBP6,PTAFR,PTGIS,SERPINA3,Tmsb4x (includes others)	125 (11)
	PPARA		ligand-dependent nuclear receptor		0.638		0.00841	APEX1,C1QA,C1QB,CEBPD,ENTPD1,FABP4,GPD1,HLA-DQA1,IGFBP6,PC,PLA2G7,PLIN2,SCD,UCP2	82 (16)
	wortmannin		chemical drug		0.635		0.000225	ANPEP,BCL2L11,CCN2,CEBPD,CKB,CYP2E1,ENTPD1,GPD1,ITGAM,MAF,MMP2	134 (15)
	PD98059		chemical - kinase inhibitor		0.63		3.35e-07	ACE,ANPEP,BCL2L11,CAV3,CCN2,CEBPD,CTSB,CTSH,DES,ENTPD1,FABP4,HAS1,IGF2,ITGAM,ITGAX,ITGB2,MMP12,MMP2,MYH1,PC,PTAFR,RECK,SIRPA,SLC8A1,TGFB1,TNFRSF11A	132 (18)
	dihydrotestosterone		chemical - endogenous mammalian		0.623		3.99e-05	ABCG1,ACE,ADH1C,APOD,CCN2,CDO1,DHCR24,FABP4,FGFR1,FTL,GPD1,GSN,MAF,MMP2,PC,PTGER4,SCD,SDC3,SFRP4,SLC7A8,Tmsb4x (includes others),UAP1,WIF1	161 (17)
	GW3965		chemical reagent		0.606		0.0081	ABCG1,APOD,GNG2,GRAP2,PLIN2,SCD	15 (2)
	trichostatin A		chemical drug		0.591		0.000104	ADGRE1,BCL2L11,CD28,CIITA,DDR2,ENPP2,FABP4,FES,FGFR1,GSN,HLA-DQB1,IPCEF1,ITGAM,ITGAX,LAMA2,LGMN,MAF,MAPK12,MYF6,NRP1,PLCE1,PREX1,PTPN7,RECK,SFRP4,SLC7A8,SLC8A1,TGFB1	124 (13)
	N-acetyl-L-cysteine		chemical drug		0.579		0.0268	ADGRE1,ATP1A3,BCL2L11,CCN2,ITGAM,MMP2,TGFB1,TLR6
	POU5F1		transcription regulator		0.566		0.0122	BCL2L11,CTSB,GM2A,HEXA,MMP2,NAIP,NRP1,RCAN1,SIRPA,SLC11A1,TGFB1,ZEB2
	pirinixic acid		chemical toxicant		0.561		0.00523	ACACB,ADH1C,CTSB,ENTPD1,FABP4,GPD1,HLA-DQA1,ITGAM,LPIN2,PLIN2,PTAFR,SCD,ST3GAL5,UCP2	80 (16)
	P38 MAPK		group		0.56	bias	0.0011	CAV3,CCN2,CEBPD,DES,FABP4,ITGAM,ITGB2,MMP12,MMP2,PLA2G7,RAB7B,RCAN1,SLC8A1,TGFB1	110 (17)
	ID2		transcription regulator		0.555		0.042	BCL2L11,IKZF3,IRF5,MAF,MMP2,POU2F2,SLAMF6
	NR1H4		ligand-dependent nuclear receptor		0.547		0.00558	ABCG1,ANPEP,COL6A5,CTSB,ITGAM,LAMB2,MMP2,TGFB1,TGFBI	125 (16)
	TWIST1		transcription regulator		0.535		0.000147	APOD,BCL2L11,DDR2,GSN,MMP2,SDC3,SPOCK2,TGFB1,TGFBI,ZEB2	103 (7)
	ADCYAP1		other		0.52		0.0216	ADCYAP1R1,CEBPD,ENPP2,Gbp8,ITGAM,SERPINA3,TGFBI,UCP2
	PI3K (family)		group		0.505		0.0229	ABCG1,BCL2L11,MMP12,MMP2,PREX1
	staurosporine		chemical drug		0.503		0.000387	CD28,CYP2E1,IGF2,ITGB2,MMP2,PINK1,RCAN1,SERPINA3	145 (17)
	CTNNB1		transcription regulator		0.494		0.000104	ACAP1,APOD,BCL2L11,CCN2,CFD,CYFIP2,CYP2E1,DES,DPEP1,ENPP2,FABP4,FGD2,FGD4,FLI1,IGF2,ITGB2,LBH,LIMD2,LIPA,MMP2,MYH6,PLIN2,PTPRJ,RASSF4,SCD,SERPINA3,SFRP4,TGFB1,WIF1,ZEB2	132 (18)
	thyroid hormone		chemical - endogenous mammalian		0.478		0.00516	ABCG1,ACE,COX7A1,CPE,KLF9,MYH6,Tmsb4x (includes others),UCP2
	BDNF		growth factor		0.478		0.0241	APEX1,ATP1A3,BCL2L11,CYGB,FTL,KIF21B,LAMB2,MACROD1,SEMA3E,Tmsb4x (includes others)
	ESR2		ligand-dependent nuclear receptor		0.477		7.19e-06	ANPEP,ANXA4,APEX1,CADM3,CCN2,CCN3,CD93,CEBPD,CTSH,DOCK10,ENPP2,FGFR1,GM2A,IP6K3,LAPTM5,MICOS10-NBL1/NBL1,MMP2,MYH1,MYH6,PLIN2,PTGIS,RASSF2,SEMA3B,SFRP4,SLC25A4,SLIT3,TGFB1	151 (13)
	SMARCB1		transcription regulator		0.468		0.0267	ARHGAP4,BCL2L11,CYP2E1,FABP4,GSN,NUP210,PC
	SREBF1		transcription regulator		0.458		0.00678	ACACB,ADH1C,C5AR1,CEBPD,CFD,FABP4,SCD,SERPINA3,TGFB1,UCP2	117 (13)
	NR5A2		ligand-dependent nuclear receptor		0.456		0.0117	C1QB,C3AR1,C5AR1,CEBPD,CFD,TGFB1
	FOXO1		transcription regulator		0.452		0.00138	BCL2L11,C1QA,CCN2,CCN3,FABP4,GPD1,IL10RB,IRF5,ITGAM,ITGB2,LCP2,LPIN2,PRCP,SCD,TGFB1,TNFRSF11A	136 (21)
	5-O-mycolyl-beta-araf-(1->2)-5-O-mycolyl-alpha-araf-(1->1')-glycerol		chemical - endogenous non-mammalian		0.447	bias	0.00736	FABP4,LRP12,NAIP,PLA2G7,RCAN1
	mir-210		microRNA		0.447	bias	0.0126	CCN2,EPB41L1,LASP1,NUP210,SCARA3
	3M-002		chemical reagent		0.447		0.0325	ACAP1,FPR1,HLA-DMB,ITGAX,MYOC
	ERBB3		kinase		0.44		0.0245	CCN2,IGF2,ITGB2,SERPINA3,TNXB
	SYK		kinase		0.436		0.00131	BCL2L11,DOCK10,ITGAM,LY9,PLCG2,RASSF4,TGFB1	54 (5)
	Vegf		group		0.415		0.0036	ACE,ANPEP,BCL2L11,CD93,ENPP2,ENTPD1,FABP4,ITGA10,MMP2,NRP1,PC,PIK3CG,RCAN1,RECK,TGFB1,TNFRSF11A	126 (18)
	PLCG2	-0.43	enzyme		0.404		0.000114	C1QA,C1QB,HLA-DQA1,ITGAM,ITGAX,MMP12,PLCG2	69 (7)
	S100A8		other		0.396		0.00129	ABCG1,C1QB,ENPP2,FBLIM1,ITGAM,MMP2,MYH1,NTRK3,SEMA3B
	SMAD4		transcription regulator		0.393		0.0224	AIM2,CCN2,INPP5D,NPR2,PILRA,PTGER2,SCD,SLC25A4,TGFB1
	DIO3		enzyme		0.392		0.000196	ADCY7,ADCYAP1R1,ART3,FXYD6,ITGAM,ITGB2,KLF9,LAPTM5,NFAM1,Tmsb4x (includes others)
	benzo(a)pyrene		chemical toxicant		0.391		0.0403	BCL2L11,IGFBP6,LCP1,MAF,PTGER2,SFRP4,TGFB1
	SB203580		chemical drug		0.386	bias	0.000243	AIM2,BCL2L11,C3AR1,CAV3,CCN2,CD28,CEBPD,CIITA,CTSH,FYB1,HAS1,ITGAM,MAPK12,MMP12,MMP2,RND1,TGFB1,UCP2	120 (15)
	L-glutamic acid		chemical - endogenous mammalian		0.378		0.00383	BCL2L11,CFD,DHCR24,HEXA,MMP2,PLIN2,SCD	141 (18)
	IRF4		transcription regulator		0.376		0.00585	ALPK2,CD28,CIITA,ENTPD1,INPP5D,IRF5,PTGER4,SH3KBP1
	DICER1		enzyme		0.366		2.63e-06	ANPEP,APOD,BCL2L11,CD226,DES,DHCR24,ENTPD1,GNG2,IGF2,ITGAX,LCP1,MAF,PIK3CG,RFTN1,SFRP4,TGFB1,ZEB2	114 (6)
	IL1A		cytokine		0.36		0.0279	APOD,CYP2E1,FGFR1,MMP12,MMP2,P2RY6,SERPINA3,TGFB1
	NR3C2		ligand-dependent nuclear receptor		0.359		0.000266	CCN2,CYFIP2,DES,HLA-DQB1,KLF9,MMP12,SERPINA3,TGFB1,TGFBI	125 (12)
	Ap1		complex		0.346	bias	0.000295	ACE,BCL2L11,C3AR1,CCN2,FABP4,KLF9,MMP12,MMP2,SLC8A1,TGFB1	137 (17)
	SMARCA4		transcription regulator		0.341	bias	0.000856	ACE,AIM2,CCN2,CIITA,COTL1,CTSB,CTSH,DES,FABP4,FBLIM1,MMP2,NRP1,PHLDB1,PLIN2,PTPN7,SEMA3B,SLC11A1,TAOK3,TBX2,WIPF1	97 (7)
	S100A9		other		0.34		0.000832	ABCG1,C1QB,ENPP2,FBLIM1,ITGAM,MMP2,MYH1,NTRK3,SEMA3B	95 (7)
	mifepristone		chemical drug		0.338		0.000964	ACE,C1QB,CCN2,CEBPD,HLA-DQB1,IGF2,ITGAM,LAMA2,PC,PTGER2,PTGIS,SFRP4,TGFB1	170 (20)
	ID1		transcription regulator		0.323		0.000524	CCN2,FABP4,IGF2,MMP2,MYF6,SCD	82 (13)
	ZBTB16		transcription regulator		0.308		0.00457	CD200R1,CD3G,CD8A,ITGAM,LY86,MAF,SCD,SLAMF6,TLR6
	APOE		transporter		0.307		5.55e-08	ADGRE1,APOD,C1QA,C1QB,C3AR1,C5AR1,CCN2,CTSB,IGFBP6,IL10RB,ITGAM,ITGAX,LIPA,MMP2,PC,PLIN2,PTP4A3,RCAN1,SERPINA3,TGFB1,UCP2	128 (14)
	simvastatin		chemical drug		0.303		0.00418	ABCG1,ADCYAP1R1,C5AR1,CCN2,CIITA,COTL1,ENTPD1,ITGB2,MMP2	122 (14)
	4-hydroxytamoxifen		chemical drug		0.293		1.32e-05	BCL2L11,CCN2,CCN3,CEBPD,FABP4,FGFR1,GM2A,MICOS10-NBL1/NBL1,PTGER4,RASD1,RND1,SLC25A4	148 (17)
	PLAG1		transcription regulator		0.293		0.00936	CD300C,IGF2,LILRB3,PTP4A3
	MAP3K5		kinase		0.283	bias	0.000241	ACE,BCL2L11,CCN2,TGFB1	114 (13)
	vitamin E		chemical drug		0.283		0.0153	ATP1A3,MMP2,TGFB1,UCP2
	tyrphostin AG 1478		chemical drug		0.283	bias	0.0204	ACE,ITGAM,MMP2,PTGER2
	captopril		chemical drug		0.279		0.000134	ACE,CYP2E1,FBLIM1,IGFBP6,MYH6,SLC8A1,TGFB1	90 (10)
	CBFB		transcription regulator		0.277		0.00172	BCL2L11,FABP4,IKZF3,LGMN,NRP1,PTGER4
	SB-431542		chemical reagent		0.277		0.0397	C5AR1,CCN2,DHCR24,MMP2,TGFB1
	APP		other		0.272		0.00141	ABCG1,ADAP1,ATP1A3,BCL2L11,CAP1,CCN2,CKB,CTSB,CYFIP2,ENPP2,FGFR1,GNG2,HAVCR2,IGF2,IRF5,ITGAM,LHFPL2,MAF,MMP12,MMP2,NRP1,RASSF2,RCAN1,SIRPA,ST3GAL5,TGFB1	157 (20)
	RAC1		enzyme		0.262		0.027	CCN2,CIITA,GSN,MMP2,TGFB1
	BSG		transporter		0.255		0.00555	BCL2L11,CIP2A,MMP2,TGFB1	139 (18)
	STAT5A		transcription regulator		0.254		0.00859	ABCG1,FABP4,Klre1,KSR1,MAF,MYH1,SERPINA3,SLC7A8,TGFBI,TNFRSF11A	19 (2)
	linoleic acid		chemical - endogenous mammalian		0.254		0.0213	FABP4,PLIN2,SCD,UCP2
	Alpha catenin		group		0.25	bias	1.42e-06	ADAM8,CCN3,CTSB,IGF2,IGFBP6,ITGAM,LAMA2,MMP12,MMP2,WIPF1,ZEB2
	D-fructose		chemical - endogenous mammalian		0.246	bias	0.000588	FABP4,ITGAM,MMP2,SCD,TGFB1	124 (14)
	RORA		ligand-dependent nuclear receptor		0.218		0.00382	ACACB,CAV3,CYP2E1,DHCR24,LPIN2,PLIN2,SCD,SLC16A10,UCP2
	INSIG1		other		0.216	bias	4.57e-07	ABCG1,ACACB,DHCR24,FABP4,HLA-DQA1,LIPA,PLA2G7,PLIN2,SCD,TGFB1,UCP2	62 (7)
	LEPR		transmembrane receptor		0.2		1.72e-05	ABCG1,ADAM8,ADGRE1,CYP2E1,FYB1,ITGAM,LGMN,MMP12,MMP2,PC,TGFB1,UCP2	148 (16)
	PPARG		ligand-dependent nuclear receptor		0.187		0.00304	ABCG1,CCN2,CFD,FABP4,GPD1,IGFBP6,MYF6,PC,PID1,PLIN2,RGL1,SCD,TBXAS1,UCP2,VSIR,WIPF1	113 (19)
	actinomycin D		biologic drug		0.168		0.00067	ABCG1,BCL2L11,CCN2,CD28,FGFR1,FPR1,MMP12,MMP2,PTGIS,SDC3,TGFB1	109 (13)
	SRC		kinase		0.168		0.0101	ABCG1,CTSB,HAS1,MMP2,SIRPA,TNFRSF11A
	REN		peptidase		0.152		0.000631	ACE,CCN2,CYP2E1,MYH6	90 (9)
	PTGS1		enzyme		0.152		0.0038	FABP4,MMP2,PTGER2,PTGER4	74 (9)
	LGR4		transmembrane receptor		0.152		0.00517	CYP2E1,SFRP4,SLC16A10,ZEB2
	homocysteine		chemical - endogenous mammalian		0.152		0.0221	DES,ITGAM,MMP2,PTGIS,SCD
	ZEB1		transcription regulator		0.152		0.044	CCN2,MMP2,NRP1,TGFBI
	Tgf beta		group		0.139		0.000147	ADH1C,CCN2,CHST11,CIITA,ENTPD1,INPP5D,MAF,MMP2,PHLDB1,PTGER2,SLIT3,TGFB1,TGFBI,TNFRSF11A	150 (17)
	JUN		transcription regulator		0.137		1.2e-05	APEX1,BCL2L11,C1QB,C3AR1,C5AR1,CCN2,CCN3,CFD,CYGB,FABP4,IGFBP6,ITGAM,MAF,MMP12,MMP2,MYH6,SCD,SLC8A1,TGFB1,Tmsb4x (includes others),ZEB2	161 (17)
	pentoxifylline		chemical drug		0.132		0.00295	ACE,CCN2,ITGAM,TGFB1	128 (16)
	TFAP2C		transcription regulator		0.132		0.0232	CCN2,MMP2,NRP1,SEMA3B
	NR3C1		ligand-dependent nuclear receptor		0.127		0.00135	ADH1C,ARRB2,BCL2L11,CARD14,CCN2,CEBPD,COQ8A,CORO2A,FABP4,FGD4,IP6K3,ITGB2,KLF9,MYOC,NAIP,NLRC4,PC,PLIN2,RASD1,SH3KBP1,TGFB1,TLR1	180 (16)
	cigarette smoke		chemical toxicant		0.126		0.00184	CCN2,CKB,CYP2E1,FTL,MMP12,MMP2,P2RX4,P2RY6,SERPINA3,TGFB1,Tmsb4x (includes others)	125 (14)
	POR		enzyme		0.113		0.000282	CIITA,DHCR24,HLA-DQA1,HLA-DQB1,MAP3K6,Naip1 (includes others),PLA2G7,SCD,SERPINA3,TMEM267
	rosiglitazone		chemical drug		0.109		2.75e-05	ABCG1,ADAM8,ADGRE1,ASAH1,C1QA,C1QB,CCN2,CFD,CIITA,COX7A1,FABP4,GPD1,HAS1,IGF2,IGFBP6,ITGAM,PC,PLIN2,SCD,UCP2	126 (18)
	lysophosphatidylcholine		chemical - other		0.106	bias	0.0285	CCN3,IRF5,NAIP,SCD
	KRAS		enzyme		0.087		9.28e-05	ABCG1,ANPEP,CCN2,FES,FGFR1,GSN,HEXA,HLA-DMB,IGF2,ITGAM,ITGB2,KSR1,LAMA2,LAMB2,LBH,LTBP4,MAPK12,MICOS10-NBL1/NBL1,MMP2,NUP210,PC,PLEKHO2,SCD,SERPINA3,SIRPA,TGFB1	134 (18)
	FST		other		0.068		0.0161	COX7A1,FABP4,MMP2,UCP2
	Insulin		group		0.06		0.0397	ADH1C,CCN2,CEBPD,CFD,CYP2E1,ENPP2,FABP4,FTL,GPD1,IGF2,MMP2,PLIN2,SCD,TGFB1,TGFBI,UCP2
	diethylstilbestrol		chemical drug		0.056		0.00178	ADCYAP1R1,ADH1C,C1QA,CCN2,CPE,CYGB,IGFBP6,IGSF6,MMP2,SCARA5,TGFB1,TGFBI	50 (5)
	decitabine		chemical drug		0.025		0.00189	AIM2,BCL2L11,CCN2,CD226,CD8A,CDO1,DDR2,FES,FGFR1,GSN,IPCEF1,ITGAX,LAMA2,MAF,MAPK12,MMP2,MYF6,PLCE1,PREX1,RASSF2,RECK,TGFBI,WIF1	108 (9)
	CEBPB		transcription regulator		0.024		0.00315	ADH1C,C1QA,C3AR1,CDO1,CEBPD,CFD,CYP2E1,DYNLT1,FABP4,FTL,INMT,LCP2,LGMN,NRP1,RCAN1,SCD,SEMA3E,TGFB1	107 (16)
	colistin		biologic drug		0		3.66e-06	APOD,C1QA,C1QB,CTSB,HAVCR2,MMP2,SDC3,SLC7A8,TMEM100,TNFRSF11A
	kanamycin A		chemical drug		0		4.31e-06	APOD,C1QA,C1QB,CTSB,HAVCR2,MMP2,SDC3,SLC7A8,TMEM100,TNFRSF11A
	metronidazole		chemical drug		0		1e-05	APOD,C1QA,C1QB,CTSB,HAVCR2,MMP2,SDC3,SLC7A8,TMEM100,TNFRSF11A
	propylthiouracil		chemical drug		0		8.73e-05	ART3,C1QB,CPE,FBLIM1,GSN,IGF2,LAPTM5,MYH6,NRP1,PCOLCE2,SLC16A10,TBX2
	SEMA7A		transmembrane receptor		0	bias	0.000289	CCN2,CCN3,CTSB,TGFB1
	CALCA		other		0		0.0011	CARD14,ENTPD1,HAVCR2,IKZF3,IRF5,NRP1,PTGER4,SLC43A2,ZEB2
	RGS4		enzyme		0		0.00215	ANXA4,CRHR2,FBLIM1,NUP210,SLIT3,WDFY4
	KDM3A		transcription regulator		0	bias	0.00295	CCN2,GNG2,MMP12,TNXB	57 (7)
	ATP2B2		transporter		0		0.0038	DDR2,Gbp8,MMP2,SERPINA3
	ITGB1		transmembrane receptor		0		0.00414	HAS1,IGF2,MMP2,SIDT1,SPON1,TGFB1,TNXB	73 (11)
	OLR1		transmembrane receptor		0		0.0048	ACE,CCN2,ITGAM,TGFB1	117 (15)
	EHMT1		transcription regulator		0	bias	0.00612	ANPEP,CEBPD,CILP,CORO2A,PLIN2,SCARA5	38 (4)
	Am 580		chemical reagent		0		0.0073	APOD,CYP2E1,PLIN2,SCD
	HDL		complex		0		0.00778	ABCG1,ITGAM,ITGB2,PTGIS	57 (8)
	PTN		growth factor		0	bias	0.00882	LPIN2,PC,PLIN2,SCD
	Mek		group		0		0.011	ANPEP,BCL2L11,CCN2,DDR2,FGFR1,LAMB2,MAF,MMP2,NCEH1,NUP210,OSBPL8
	prexasertib		chemical drug		0	bias	0.0169	AIM2,NLRP1,SFRP4,SLIT3
	FFAR3		G-protein coupled receptor		0		0.0333	ANPEP,ENPP2,HLA-DMB,LY86
	COL18A1		other		0	bias	0.0384	FGFR1,ITGB2,MMP2,NRP1
	diclofenac		chemical drug		0		0.0397	ITGAM,KLF9,LBH,TMEM100
	SLC13A1		transporter		0		0.0425	HLA-DMB,INMT,KLF9,SCD
	elaidic acid		chemical - endogenous mammalian		0	bias	0.044	DHCR24,LIPA,PPT1,SCD
	isoproterenol		chemical drug		-0.029		0.00357	ACE,BCL2L11,MMP2,PLIN2,SCD,TGFB1,TNXB,UCP2	132 (20)
	GATA4		transcription regulator		-0.041		0.0126	CCN2,DES,IGFBP6,INMT,MYH6,SERPINA3,SFRP4,SLC8A1,TGFBI
	Akt		group		-0.042		0.000155	BCL2L11,CAV3,CCN2,FABP4,IGF2,LAMB2,MMP12,MMP2,NCEH1,PTAFR,PTGER2,PTGER4,RASD1,SCD,SLC8A1,TNFRSF11A	122 (16)
	WNT3A		cytokine		-0.045		0.0245	ALPK2,BCL2L11,CCN2,CFD,FABP4,LBH,MYH6,TGFB1,TNXB,WIF1
	TET3		enzyme		-0.068		0.00149	KLF9,MYH6,SFRP4,SLC43A2	26 (3)
	PIK3CA		kinase		-0.068		0.0223	CEBPD,ITGAM,PIK3CG,TGFB1
	ANGPT2		growth factor		-0.082		0.0363	BCL2L11,ITGAX,MAPK12,MMP2,MYH6,RCAN1,TGFB1
	AR		ligand-dependent nuclear receptor		-0.1		0.000559	ABCG1,ATP1A3,BCL2L11,CADM3,CDC42SE2,CDO1,COTL1,DES,DHCR24,GPD1,GSN,IGF2,LTBP4,MMP2,MYH6,PLCE1,RNF128,SERPINA3,TBXAS1,TGFB1,TLR6,WIPF1	148 (16)
	TCF7L2		transcription regulator		-0.102	bias	0.0136	APOD,CAP1,CCN2,CERS2,CYP2E1,DHCR24,DOCK10,ENPP2,FABP4,GSN,LBH,RASGEF1B
	FN1		enzyme		-0.103		6.43e-05	ACE,CCN2,CD8A,DHCR24,EPB41L1,ITGAM,KIF21B,MMP2,RASSF2,RECK,SDCBP,TGFB1	118 (16)
	HTT		transcription regulator		-0.114		0.0149	ATP1A3,BCL2L11,CCN2,CYFIP2,ENPP2,FGFR1,FXYD6,GSN,IGF2,KLF9,MMP2,MYH1,OSBPL8,PC,SERPINA3,SIRPA,TGFBI,Tmsb4x (includes others)
	TGFB3		growth factor		-0.127		0.000327	CCN2,CCN3,MMP2,PTAFR,SCD,SDC3,TGFB1,ZEB2	166 (20)
	TREM2		transmembrane receptor		-0.128		0.00019	CTSB,FABP4,FZD9,ITGAX,LIPA,WIF1
	SFTPA1		transporter		-0.128		0.000925	ANPEP,ARRB2,CCN2,PLIN2,RASD1,TGFB1	129 (12)
	TSC2		other		-0.128		0.0288	ENPP2,GSN,NTRK3,RASSF4,SCD,UCP2
	bisindolylmaleimide iv		chemical drug		-0.13		0.000342	CCN2,CYP2E1,FABP4,ITGAM	149 (20)
	SERPINE1		other		-0.13		0.00387	CCN2,FXYD6,HLA-DQB1,PI16,TGFB1	47 (7)
	ADORA2A		G-protein coupled receptor		-0.13		0.049	ATP1A3,CD28,CKB,PLA2G12A,TGFB1
	dehydroisoandrosterone		chemical - endogenous mammalian		-0.132		0.0285	CD3G,FABP4,MYH6,SCD
	DMD		other		-0.152		0.000322	C1QB,CHRNA10,CYFIP2,DES,GPD1,IGF2,IP6K3,MYH1,SNTA1,SPTB,Tmsb4x (includes others)
	PTH		other		-0.152		0.00383	CARD14,CCN2,MMP2,SFRP4,SLC43A2,SLC8A1,TGFB1,WIF1	116 (15)
	dimethylnitrosamine		chemical toxicant		-0.152		0.0048	CYP2E1,DES,IGF2,TGFB1
	prostaglandin D2		chemical - endogenous mammalian		-0.152		0.0111	HAS1,ITGAM,NRP1,PHLDB1
	NRIP1		transcription regulator		-0.152		0.0153	ACACB,COX7A1,SCD,SLC16A10
	HNF1B		transcription regulator		-0.156		0.0315	ANXA4,FBLIM1,MMP2,PTGIS,ZEB2
	TO-901317		chemical reagent		-0.17		0.00732	ABCG1,ADH1C,APOD,FABP4,GPD1,Naip1 (includes others),SCD,SERPINA3,TGFB1	137 (19)
	EGF		growth factor		-0.176		0.0232	ANPEP,CCN2,CEBPD,DES,FGD4,FGFR1,FLI1,IGF2,ITGAM,MMP12,MMP2,NPR2,NRP1,SCD,SERPINA3,TGFB1
	DCN		other		-0.179		0.0011	CCN2,HLA-DQA1,HLA-DQB1,MMP2,TGFB1	135 (18)
	minocycline		chemical drug		-0.179	bias	0.0046	ACE,ADGRE1,ITGAM,ITGAX,MMP2	100 (10)
	NR4A1		ligand-dependent nuclear receptor		-0.208		0.000928	APOD,BCL2L11,CAV3,CCN2,FABP4,GPD1,PC,PRKAG3,RASSF4,SCD,SLC37A2,UCP2	140 (22)
	EP300		transcription regulator		-0.218	bias	0.000718	ACACB,CAV3,CKB,FABP4,GIMAP4,GM2A,GNG2,IGFBP6,ITGB2,MAF,MYO1F,NTRK3,PLA2G7,RGL1,SLAMF6,TBXAS1	94 (10)
	DNMT3B		enzyme		-0.218		0.00396	HLA-DQB1,IRF5,MYH1,MYH6,RCAN1,RECK,SFRP4,SLC8A1	24 (3)
	IGF1		growth factor		-0.237		5.52e-05	ANPEP,BCL2L11,C1QA,CCN2,CEBPD,CYFIP2,FABP4,FGFR1,GPD1,HAVCR2,IGF2,IGFBP6,LASP1,MMP2,MYH6,PLIN2,PTGER4,RND1,SCD,TBX2,TGFB1,TGFBI	161 (20)
	NFKB2		transcription regulator		-0.239		0.00559	BCL2L11,ENPP2,HLA-DMB,HLA-DQA1,MAF,MMP2,SEMA3E	114 (8)
	SP1		transcription regulator		-0.24	bias	3.51e-05	CCN2,CD28,CEBPD,CIITA,CKB,DHCR24,FES,FGFR1,HAS1,IGF2,ITGAM,ITGAX,LIPA,MMP2,PREX1,PTGER4,RECK,SLC11A1,SLC25A4,SPTB,TGFB1,ZEB2	130 (14)
	ESR1		ligand-dependent nuclear receptor		-0.249		1.26e-05	ACE,ADH1C,ANXA4,APEX1,BCL2L11,CARD14,CCN3,CDC42SE2,CEBPD,CKB,COTL1,CPE,CTSB,CYFIP2,CYP2E1,DHCR24,ENPP2,FGFR1,FXYD6,GM2A,GSN,IGF2,INMT,IRF5,ITGA10,LAMB2,LAPTM5,LTBP4,MAPK12,MICOS10-NBL1/NBL1,NUP210,PHLDB1,PLCE1,PLIN2,RND1,SCD,SEMA3B,SLC25A4,SLC7A8,TGFB1,Tmsb4x (includes others)	161 (14)
	doxycycline		chemical drug		-0.254		0.0106	ADGRE1,CEBPD,ITGAX,MMP12,MMP2
	CXCL8		cytokine		-0.256		0.000212	CPE,HAS1,ITGAM,ITGAX,ITGB2,MAPK12,MMP2	93 (14)
	IL13		cytokine		-0.269		6.25e-09	ADAM8,C3AR1,CCN2,CLEC4A,CTSB,CTSH,DHCR24,ENPP2,FABP4,FGD2,GSN,LILRB3,LIPA,MAF,MMP12,MMP2,PID1,PLIN2,RFTN1,SLA,SLC8A1,TGFB1,TLR1,TNFRSF11A,TNXB	132 (15)
	IL10		cytokine		-0.27		1.14e-06	ASAH1,BCL2L11,CD28,CIITA,CTSB,CTSH,FPR1,GNS,HEXA,HLA-DQB1,INPP5D,ITGAM,LGMN,LIPA,MAF,MMP2,PIK3CG,PTAFR,SLC11A1,TGFB1,TLR1,TNFRSF11A	152 (19)
	Calcineurin protein(s)		complex		-0.271		0.00387	BCL2L11,CYGB,RCAN1,RNF128,SLC8A1	73 (8)
	ARID1A		transcription regulator		-0.277		0.0142	CAV3,FZD4,FZD9,IKZF3,WIF1
	Y 27632		chemical drug		-0.277		0.0253	CCN2,FABP4,MMP2,TGFB1
	HRAS		enzyme		-0.288		4.63e-05	ATP1A3,BCL2L11,CAV3,CCN2,CEBPD,CHST11,CTSB,GSN,IGF2,ITGAM,LASP1,LBH,MAPK12,MMP2,NRP1,PREX1,RECK,SCD,SERPINA3,SIRPA,SLIT3,SPON1,TGFB1,Tmsb4x (includes others)	125 (19)
	Immunoglobulin		complex		-0.292		4.49e-09	ANPEP,C3AR1,C5AR1,CD28,CD8A,CD93,CEBPD,CFD,CIITA,CORO2A,CTSH,CYP2E1,ENTPD1,FPR1,HLA-DQB1,IL10RB,IRF5,ITGAM,ITGAX,LILRB3,MAF,MMP2,NAIP,NRP1,PC,POU2F2,PTAFR,PTGER2,RNF128,SCD,SERPINA3,SIRPA,SLC11A1,TGFB1,TNFRSF11A,ZEB2	147 (15)
	DNMT3A		enzyme		-0.302		1.82e-05	ACE,ADCY7,BCL2L11,IRF5,MYH1,MYH6,PIK3CG,PLA2G7,PLD4,SLC8A1,SLIT3,TGFB1	85 (12)
	aflatoxin B1		chemical - endogenous non-mammalian		-0.302		0.00363	ADAM8,CFD,CYP2E1,FABP4,HLA-DQA1,HLA-DQB1,MMP12,MMP2,SEMA3B,SLC25A4,TLR1	60 (7)
	TP53		transcription regulator		-0.304		1.67e-07	ACACB,ACE,ADAM8,ANXA4,APEX1,APOBEC1,ARRB2,BCL2L11,CAP1,CARD11,CCN2,CEBPD,CISD1,CKB,COQ8A,COX7A1,CTSB,CTSH,CTSW,CYFIP2,DHCR24,DPEP1,ENPP2,FABP4,FGFR1,GPD1,GSN,HLA-DQA1,IGF2,INMT,IRF5,KSR1,LAMB2,LASP1,MAPK12,MMP2,NFAM1,NLRC4,NRP1,P2RX4,PIK3CG,PINK1,PPT1,PTP4A3,RASSF2,SCD,SERPINA3,SLC25A4,SNX5,TBXAS1,TGFB1,TGFBI,TLR1,TLR6,Tmsb4x (includes others),TNFRSF11A,ZEB2	143 (18)
	carbon tetrachloride		chemical toxicant		-0.305		0.00172	ADGRE1,CCN2,CYP2E1,DES,IGFBP6,MMP12,MMP2,PTAFR,SLC8A1,TGFB1	139 (17)
	FGF8		growth factor		-0.318		0.0116	CMTM3,FGFR1,PCOLCE2,RASD1,TNXB
	CEBPA		transcription regulator		-0.322		2.76e-06	ADCY7,ADH1C,ANPEP,C3AR1,CD3G,CEBPD,CFD,CIITA,FABP4,IKZF3,ITGAM,ITGAX,MYF6,NRP1,PLIN2,PTAFR,RGL1,SCD,SEMA3E,TBXAS1,TNFRSF11A	119 (17)
	IGF2	0.704	growth factor		-0.329		0.0112	CAV3,CCN2,IGF2,IGFBP6,KLF9,MMP12,TGFBI
	L-triiodothyronine		chemical - endogenous mammalian		-0.336		0.000766	ATP1A3,ATP8B4,BCL2L11,CCN2,CTSH,ENPP2,FABP4,FGFR1,IGFBP6,KLF9,MYH6,PTAFR,PTGIS,SCD,SLC25A45,SLC43A2,TGFB1,UCP2	133 (18)
	ATG7		enzyme		-0.342		0.000813	ACACB,BCL2L11,CCN2,CTSB,RCAN1,SLC37A2,TGFB1	144 (16)
	cisplatin		chemical drug		-0.356		0.0211	ADGRE1,ANPEP,ANXA4,BCL2L11,CCN2,CDO1,CORO7/CORO7-PAM16,CTSB,FABP4,FBLIM1,INPP5D,LIPA,MMP2,RFTN1,RGL1,SLC25A4,TGFB1,Tmsb4x (includes others),UCP2
	rifampin		chemical drug		-0.372		0.0225	ABCG1,CYP2E1,ENPP2,ITGAM,SCD,TBC1D9
	TSC1		other		-0.378		0.000395	ACACB,CCN2,CTSB,CYP2E1,GNS,RNF128,SCD
	GATA1		transcription regulator		-0.378		0.00354	ARHGAP4,BCL2L11,CIITA,FLI1,FYB1,IKZF3,ITGAX,PAPPA2,SPOCK2,SPTB,UAP1
	tretinoin		chemical - endogenous mammalian		-0.379		1.38e-09	ABCG1,ACACB,ADCYAP1R1,ADGRE1,ANPEP,APBB1IP,APEX1,APOD,C1QA,C3AR1,C5AR1,CCN2,CCN3,CD300C,CD93,COTL1,CPE,CTSB,DES,ENPP2,FABP4,FGFR1,GM2A,HLA-DMB,IGF2,IGFBP6,INMT,ITGAM,ITGAX,ITGB2,KLF9,LIPA,NLRC4,NRP1,NTRK3,PAPPA2,PIK3CG,PLA2G7,PLCE1,PLEKHO2,PLIN2,PTAFR,PTGIS,PTP4A3,SCD,SDCBP,SFRP4,SIRPA,SLA,Stra6l,TBX2,TGFB1,TGFBI,TNFRSF11A,UCP2,WIPF1,ZEB2	173 (17)
	acetic acid		chemical - endogenous mammalian		-0.389		0.000216	APOBEC1,BCL2L11,CAV3,CTSB,GALNT15,GSN,LGMN,MYH1,PTGER4,SLC25A4,ZEB2
	LDL		complex		-0.399		4.4e-05	ABCG1,BCL2L11,CCN2,FABP4,LASP1,MMP12,MMP2,NRP1,PLIN2,PTAFR,RCAN1,SIPA1,TGFB1,TMEM100	147 (15)
	EDN1		cytokine		-0.402	bias	0.0292	ANXA4,CCN2,ITGAM,MMP2,PTGER2,PTGER4,SLC8A1
	CSF3		cytokine		-0.412		1.75e-06	ADGRE1,C3AR1,CD300LD,CEBPD,DES,ENPP2,ENTPD1,FPR1,HLA-DQA1,ITGAM,ITGB2,MMP2,TGFB1	139 (17)
	VEGFA		growth factor		-0.44		3.52e-05	ACE,ANPEP,CCN2,CTSB,FABP4,FGFR1,HAVCR2,HLA-DQB1,INPP5D,MMP12,NRP1,PIK3CG,RCAN1,TGFB1,TLR1	133 (16)
	F3		transmembrane receptor		-0.447	bias	0.00303	CCN2,ITGAM,LCP1,MMP2,TNFRSF11A	112 (12)
	PDLIM2		other		-0.447		0.0111	ENPP2,FXYD6,GNG2,RNF128,SCARA3
	cytokine		group		-0.447	bias	0.0238	C5AR1,CCN3,CD93,MMP12,MMP2,NCR1
	LEF1		transcription regulator		-0.447		0.028	CPE,MAPK12,MMP2,Naip1 (includes others),PTGER2,ZC3H12D
	cycloheximide		chemical reagent		-0.451		0.000138	APBB1IP,CCN2,CD8A,CEBPD,FGFR1,HEXA,IGF2,IGFBP6,ITGAM,MMP12,MMP2,MYOC,PTGIS,RCAN1,SCD,TGFB1	147 (18)
	ERK1/2		group		-0.457		0.00511	ASAH1,ATP1A3,BCL2L11,CAV3,CCN2,CTSB,FABP4,MMP12,MMP2,PTGER2,PTGER4	131 (14)
	NR4A3		ligand-dependent nuclear receptor		-0.46		5.04e-06	ADAM8,ADGRE1,CAV3,CD300C,FABP4,MMP12,MMP2,MYH1,UCP2	62 (7)
	pioglitazone		chemical drug		-0.463		6.69e-06	ABCG1,CCN2,CEBPD,CFD,FABP4,HAS1,ITGAM,NCEH1,PC,PLIN2,TGFB1,TNFRSF11A,UCP2	125 (20)
	NOS3		enzyme		-0.469		0.00555	ADGRE1,CCN2,MMP2,TGFB1	132 (20)
	IL3		cytokine		-0.478		3.67e-05	ADGRE1,BCL2L11,C1QA,CCN3,CD3G,FGFR1,ITGAM,ITGAX,KLF9,LY9,NRP1,PAPPA2,PLA2G7,SERPINA3,TNFRSF11A,UCP2	93 (8)
	Jnk		group		-0.48		0.0132	ASAH1,BCL2L11,CCN2,FABP4,FLI1,MMP12,MMP2,TGFB1
	C3		peptidase		-0.514		0.0012	C1QA,C3AR1,C5AR1,ITGAM,TGFB1,UCP2	143 (15)
	N-cor		group		-0.555	bias	2.43e-08	ACACB,C1QA,CTSB,FABP4,MMP12,MMP2,PID1,PLIN2,RGL1,SCD,TBX2,WIPF1	92 (16)
	USP22		peptidase		-0.555	bias	0.0035	FES,ITGAM,ITGB2,TGFB1
	ILF3		transcription regulator		-0.555		0.00931	C3AR1,CIITA,PLA2G7,PTGER4,SCD
	NFE2L2		transcription regulator		-0.556		0.00784	ACE,CCN2,CD8B,CFD,FABP4,FTL,INMT,MMP12,P2RX4,PLIN2,SERPINA3,SLC7A8,TBXAS1,TGFB1	158 (18)
	Nfat (family)		group		-0.557	bias	0.00358	DOCK10,FABP4,HAVCR2,LBH,RCAN1,RNF128
	entinostat		chemical drug		-0.588		0.00387	BCL2L11,GSN,ITGAM,ITGAX,MMP2	129 (17)
	RAD21		transcription regulator		-0.594		0.00203	HLA-DQA1,HLA-DQB1,IGF2,TGFB1	101 (7)
	FGF10		growth factor		-0.6	bias	0.000128	CTSB,CTSH,IL10RB,MYH6,SCD,TGFB1
	ERBB4		kinase		-0.6		0.00931	IGF2,PTGIS,SERPINA3,TBXAS1,Tmsb4x (includes others)	100 (7)
	lisinopril		biologic drug		-0.605		0.00203	ACE,ITGB2,MMP2,TGFB1	37 (6)
	streptozocin		chemical drug		-0.608		0.00879	CCN2,CYP2E1,FABP4,MAF,MMP2,MYH6,NTRK3,SCD,SLC7A8,TGFB1	135 (18)
	Growth hormone		group		-0.61		0.0241	CEBPD,CRHR2,CYP2E1,FABP4,IGF2,IGFBP6,TGFB1,ZEB2
	sunitinib		chemical drug		-0.626		0.00233	BCL2L11,CCN2,HAS1,ITGB2,TGFBI	101 (12)
	IL6		cytokine		-0.631		4.77e-06	ADGRE1,ANPEP,BCL2L11,C5AR1,CCN2,CEBPD,CFD,CIITA,CYP2E1,ENPP2,FLI1,HLA-DQA1,IGF2,IGFBP6,ITGAM,LY86,MACROD1,MAF,MMP12,MMP2,PTGER4,PTP4A3,SERPINA3,TBC1D9,TBXAS1,TGFB1,TLR1,TLR6,TNFRSF11A	155 (17)
	cholecalciferol		chemical - endogenous mammalian		-0.631		0.000684	CEBPD,ITGAM,ITGAX,ITGB2,MYH1,MYH6,PLD4,TGFB1	105 (10)
	sirolimus		chemical drug		-0.654		0.00123	ACACB,BCL2L11,CCN2,CFD,CYP2E1,DENND1A,DES,ENTPD1,FPR1,GPD1,IGF2,MAF,MAPK12,MMP2,MYH6,PLIN2,SCD,TGFB1,UCP2	169 (17)
	PRL		cytokine		-0.657		0.00265	CEBPD,CTSB,CTSH,DES,IGF2,MICOS10-NBL1/NBL1,PC,RASD1,SERPINA3,TGFB1,Tmsb4x (includes others)	164 (19)
	SOX4		transcription regulator		-0.659		0.0104	CCN3,ENTPD1,HLA-DQB1,IGF2,NRP1,SEMA3B,SEMA3E,Tmsb4x (includes others)
	STAT6		transcription regulator		-0.665		1.34e-05	ADAP1,CTSB,CTSW,DOCK10,FABP4,FNIP2,HLA-DMB,KSR1,LCP2,LPIN2,MAF,MMP12,MMP2,POU2F2,PREX1,RASSF4,RNPEP,TGFB1,TMTC1,TNFRSF11A	126 (18)
	ERBB2		kinase		-0.685		0.0301	ADAM8,CCN2,CTSB,DPEP1,FZD4,IGF2,IGFBP6,LAMB2,MAF,MMP12,NRP1,NUP210,PHLDB1,PINK1,PLIN2,RECK,SERPINA3,SIRPA,TGFBI,Tmsb4x (includes others),ZEB2
	MAPK1		kinase		-0.708		4.77e-05	ADH1C,ANPEP,CAV3,CCN2,CD84,CTSB,CTSW,DOCK10,FES,GNG2,IGFBP6,MMP2,NRP1,NUP210,POU2F2,PTGER2,WIPF1	119 (14)
	ionomycin		chemical reagent		-0.722		0.022	ITGB2,MAF,NRP1,PTAFR,PTPRJ,RCAN1,TGFB1
	cyclosporin A		biologic drug		-0.729		0.00223	APOD,BCL2L11,CADM3,CCN2,CD8B,FBLIM1,GNPDA1,MAF,MMP2,RCAN1,RFTN1,SCD,SDCBP,SLC8A1,TGFB1	84 (13)
	NPR1		enzyme		-0.739		0.000547	ACE,MMP2,RCAN1,TGFB1
	TNFSF11		cytokine		-0.743	bias	0.000528	ADGRE1,C3AR1,CKB,FERMT3,FPR1,ITGAM,PTGER2,PTGER4,RCAN1,RGL1,TGFB1,TNFRSF11A	113 (12)
	TAF4		transcription regulator		-0.747		0.0484	CCN2,MAP3K6,MMP2,TGFB1
	KLF2		transcription regulator		-0.762		0.000365	ACE,CCN2,CD93,DOCK2,FABP4,IGF2,ITGB2,PTGIS,PTPRJ,TGFB1
	dinoprost		chemical - endogenous mammalian		-0.762		0.0242	ANXA4,FABP4,LIPA,TGFB1
	indomethacin		chemical drug		-0.765		0.000245	ADAM8,FABP4,FBLIM1,HAS1,ITGAM,MMP12,MMP2,PLIN2,PTGER4,RFTN1,UAP1,UCP2	123 (18)
	PITX2		transcription regulator		-0.774		0.0408	ADH1C,FZD4,FZD9,TBX2,ZEB2
	CCR2		G-protein coupled receptor		-0.785		0.00587	C1QA,C1QB,LAMB2,MMP2,TGFB1,TGFBI	119 (12)
	calcitriol		chemical drug		-0.794		0.0217	CD28,CEBPD,CFD,FABP4,FTL,ITGAM,ITGAX,LBH,MAF,PC,PINK1,PTGER2,SLC8A1,TGFB1,TMEM100,UCP2
	mir-19		microRNA		-0.808	bias	0.00411	BCL2L11,CCN2,COX7A1,FZD4
	PI3K (complex)		complex		-0.814		0.00128	BCL2L11,CCN2,FLI1,HAS1,IGF2,ITGAM,ITGB2,LASP1,MMP12,MMP2,PIK3CG,TNFRSF11A	142 (18)
	ciprofloxacin		chemical drug		-0.816		0.00107	ADAM8,ADGRE1,ASAH1,CD93,LGMN,MMP2,NRP1
	IL12 (family)		group		-0.816		0.00559	BCL2L11,CD8A,ENPP2,GIMAP4,IKZF3,NCR1,NRP1	90 (7)
	MAP2K1		kinase		-0.819	bias	0.0226	BCL2L11,CCN2,CTSB,MMP12,MMP2,SIRPA,TNFRSF11A
	U0126		chemical drug		-0.823		0.00673	ADGRE1,BCL2L11,CCN2,CEBPD,CIITA,CYP2E1,DES,ENPP2,FABP4,GSN,HLA-DQA1,MMP12,MMP2,PTPRJ,RFTN1,SIRPA	130 (16)
	BAX		transporter		-0.849	bias	0.00683	BCL2L11,CTSB,CTSH,MMP12
	MIR17HG		other		-0.868	bias	0.0334	BCL2L11,CPE,FZD4,RECK,SEMA3E
	ethanol		chemical - endogenous mammalian		-0.87		6.63e-06	ABCG1,ADCYAP1R1,ADH1C,ANPEP,ARRB2,C3AR1,C5AR1,CCN2,CEBPD,CYP2E1,DDR2,FGFR1,ITGAM,ITGAX,MMP12,MMP2,SCD,TGFB1,TLR1,TLR6	155 (18)
	poly rI:rC-RNA		biologic drug		-0.879		0.000428	CEBPD,CIITA,FLI1,FPR1,HAS1,HAVCR2,HLA-DMB,IGFBP6,IRF5,ITGAM,ITGAX,MMP2,MYOC,Naip1 (includes others),P2RY6,PTPRJ,SIDT1,SLC25A4,TGFB1,TLR1,TLR6,WDFY4	150 (16)
	MAFB		transcription regulator		-0.881		0.00153	ADGRE1,CAP1,CD28,FPR1,LGMN,SLC7A8
	eplerenone		chemical drug		-0.882		0.00149	ACE,CCN2,MMP2,TGFB1	132 (14)
	Hdac		group		-0.927		0.0327	KLF9,NRP1,PREX1,SLC8A1,WIF1,ZEB2
	TP73		transcription regulator		-0.941		0.00245	BCL2L11,IRF5,ITGAX,LBH,LCP1,MICOS10-NBL1/NBL1,MMP2,NLRC4,NRP1,P2RX4,PTP4A3,RAB7B,SERPINA3,TGFB1	123 (12)
	gentamicin		chemical drug		-0.943		3.16e-06	APEX1,APOD,C1QA,C1QB,CDO1,CTSB,DPEP1,ENPP2,HAVCR2,MAF,MMP2,PC,PLIN2,SDC3,SLC7A8,TGFB1,TMEM100,TNFRSF11A
	THBS1		other		-0.943		0.00246	ADCYAP1R1,CCN2,MMP2,TGFB1	141 (21)
	PPARD		ligand-dependent nuclear receptor		-0.953		0.000511	ACACB,C1QA,C1QB,FABP4,GPD1,IGFBP6,LPIN2,PLIN2,PRKAG3,SCD,ST3GAL5,UCP2	85 (16)
	SPARC		other		-0.956		0.00563	CEBPD,CFD,GPD1,MMP2,TBX2,TGFB1	126 (15)
	LEP		growth factor		-0.957		2.91e-05	ACE,ADAM8,ADGRE1,ASAH1,CFD,CRHR2,CYP2E1,FABP4,FGFR1,ITGAM,ITGAX,LIPA,MMP12,MMP2,NPR2,P2RX4,PLIN2,SCD,TGFB1,UCP2	153 (21)
	COLQ		other		-1		0.00303	LAMB2,LTBP4,MMP2,SNTA1,TGFB1
	SHC1		other		-1		0.00364	BCL2L11,FGD4,FLI1,FTL,ITGAM	96 (13)
	RHO		G-protein coupled receptor		-1		0.0153	C1QA,CEBPD,LAMB2,PLA2G7
	MMP9		peptidase		-1		0.0263	CTSB,MMP12,MMP2,TGFB1
	IRAK3		kinase		-1.067		0.000826	CCN2,INPP5D,IRF5,TGFB1	79 (7)
	PRKCD		kinase		-1.083		0.0199	CIITA,CTSB,ITGAM,LBH,MMP12,MMP2,RCAN1
	galactosylceramide-alpha		chemical reagent		-1.109		0.0012	CCN2,FABP4,NRP1,RNF128,TGFB1	149 (19)
	IL21		cytokine		-1.112		0.00396	BCL2L11,CD28,HAVCR2,IRF5,MMP12,MMP2,NCR1,TGFB1	116 (15)
	PLAU		peptidase		-1.114		0.0195	ABCG1,C5AR1,MMP12,PIK3CG
	TGFB1	-0.4	growth factor		-1.126		9.15e-16	ABCG1,ACE,AIM2,ANPEP,BCL2L11,C1QA,C1QB,C3AR1,C5AR1,CAP1,CCN2,CCN3,CD200R1,CD226,CD28,CD8B,CFD,CHST11,CIITA,COTL1,CRHR2,CTSB,CTSH,DDR2,DES,DHCR24,DOCK2,FGFR1,FLI1,FTL,FXYD6,GNG2,GNS,GSN,HAS1,HEXA,HLA-DQA1,HLA-DQB1,IGF2,IGFBP6,INPP5D,ITGAM,ITGAX,ITGB2,KLF9,LASP1,MAF,MMP12,MMP2,MS4A8,NRP1,P2RY6,PCOLCE2,PILRA,PINK1,PPT1,PTAFR,PTGER2,PTGER4,PTP4A3,RASGEF1B,RECK,RND1,SCD,SEMA3B,SERPINA3,SLA,SLC25A4,SLI…	161 (15)
	vancomycin		biologic drug		-1.127		3.21e-06	APOD,C1QA,C1QB,CTSB,FBLIM1,HAVCR2,MMP2,RFTN1,SCD,SDC3,SLC37A2,SLC7A8,TMEM100,TNFRSF11A
	ETS1		transcription regulator		-1.131		0.000108	ANPEP,CCN2,FLI1,ITGA10,ITGAM,ITGB2,Klre1,MMP2,NCR1,SLAMF6,TBXAS1,ZEB2	36 (3)
	TCF3		transcription regulator		-1.134		0.000115	ACACB,ARHGAP4,BCL2L11,CD200R1,CD3G,CD8B,CD93,CIP2A,ENTPD1,FGD2,GIMAP4,GM2A,MAF,PLCG2,RASSF4,TLR1,VSIR
	bisindolylmaleimide I		chemical drug		-1.134	bias	0.00118	ACE,CCN2,MMP12,MMP2,MYH6,POU2F2,RCAN1	131 (18)
	BCL2		transporter		-1.145		0.0193	BCL2L11,CTSH,HAVCR2,IGFBP6,MMP2
	PLAUR		transmembrane receptor		-1.154		0.00246	C5AR1,CTSB,ITGAM,MMP2	117 (16)
	platelet activating factor		chemical - endogenous mammalian		-1.167		0.00101	ITGAM,ITGB2,MMP2,PLA2G7,PTAFR	131 (18)
	CL 316243		chemical drug		-1.172	bias	9.71e-05	ADGRE1,CKB,ITGAX,SCD,UCP2	86 (12)
	caffeic acid phenethyl ester		chemical drug		-1.172		0.0199	CTSB,FTL,IGFBP6,MMP2,TGFB1
	progesterone		chemical - endogenous mammalian		-1.183		7.3e-07	ACE,ADCYAP1R1,APOD,ART3,C5AR1,CEBPD,CFD,CYP2E1,ENPP2,HLA-DQB1,INMT,KLF9,LAMA2,MICOS10-NBL1/NBL1,MMP2,NRP1,P2RX4,PLA2G7,PPM1H,PTGER2,PTGER4,RASSF2,SCD,SFRP4,TBX2,TGFB1,TGFBI,TNXB	141 (19)
	CD40		transmembrane receptor		-1.195		0.0153	ANPEP,BCL2L11,CD8A,HLA-DQB1,ITGAM,ITGB2,KLF9,PTGER2
	lipoteichoic acid		chemical - endogenous non-mammalian		-1.195	bias	0.0186	BCL2L11,MMP2,PTAFR,TLR6
	CPT1B		enzyme		-1.195		0.0341	ACACB,CALML5,COX7A1,INPP5D,PIK3CG,PRKAG3,SCD
	FAS		transmembrane receptor		-1.213		5.49e-07	ARRB2,CCN2,CD300C,CD93,CEBPD,FES,FPR1,HLA-DQB1,INPP5D,NCR1,NLRP1,P2RX4,PIK3CG,PINK1,PLIN2,PTGER2,PTGER4,RND1,SIPA1,TGFB1	51 (6)
	losartan potassium		chemical drug		-1.238		0.0178	ACE,CCN2,ITGB2,MMP2,TGFB1,UCP2
	10E,12Z-octadecadienoic acid		chemical - endogenous mammalian		-1.254		0.00815	ADAM8,CFD,FABP4,MMP12,PLIN2,SCD,UCP2	97 (16)
	docosahexaenoic acid		chemical drug		-1.29		0.0465	CCN2,MMP2,PTAFR,SCD,TGFB1,UCP2
	spironolactone		chemical drug		-1.293		0.00266	ACE,CCN2,DES,IP6K3,SCD,TGFB1	115 (12)
	SMAD7		transcription regulator		-1.311		0.00175	ADH1C,BCL2L11,CCN2,MMP12,MMP2,SCD,TGFB1,TGFBI	131 (20)
	CSF1		cytokine		-1.316		2.73e-07	BCL2L11,C5AR1,CTSH,DHCR24,FERMT3,GRAP2,IRF5,ITGAM,ITGAX,MMP12,PTPRJ,SIRPB1,SLC37A2,TGFB1,TLR1,TLR6,TNFRSF11A	150 (16)
	CD3		complex		-1.325		1.8e-06	BCL2L11,CD226,CD28,CD8A,CD8B,COX7A1,CTSW,DOCK2,FTL,FYB1,HLA-DQB1,IGFBP6,IL10RB,LCP1,MAF,MMP2,NAIP,NLRP1,PLIN2,PTGER4,PTPN7,PTPRJ,RNF128,SH2D2A,TGFB1,TNFRSF11A	141 (15)
	inosine		chemical - endogenous mammalian		-1.342	bias	0.000853	C1QA,C1QB,CFD,FTL,LCP1
	QKI		other		-1.342		0.00189	HLA-DQA1,HLA-DQB1,ITGAM,ITGAX,SCD
	INS		other		-1.342		0.0311	ADCYAP1R1,CCN2,PLIN2,SCD,TGFB1,Tmsb4x (includes others)
	HMOX1		enzyme		-1.342		0.0386	ABCG1,CYP2E1,ITGAM,MYH6,TGFB1
	fatty acid		chemical - endogenous mammalian		-1.352	bias	0.000231	CYP2E1,FABP4,ITGAM,LPIN2,PLIN2,SCD,ST3GAL5,UCP2	147 (21)
	PPARGC1A		transcription regulator		-1.355		2.52e-05	ACACB,APOD,CAV3,CCN2,CEBPD,FABP4,IGFBP6,LAMA2,LIPA,MMP2,MYH1,MYH6,NCEH1,PLA2G7,PLIN2,SCD,SERPINA3,SLIT3,UCP2	97 (18)
	HOXA10		transcription regulator		-1.387		6.17e-08	BCL2L11,CFD,CYP2E1,ENPP2,HLA-DQA1,HLA-DQB1,INMT,KLF9,LAMA2,MAPK12,MICOS10-NBL1/NBL1,PTGER4,SCD,SFRP4,TNXB
	ESRRA		transcription regulator		-1.387	bias	3.75e-05	ADAM8,ASAH1,C3AR1,CKB,CRHR2,CTSH,FABP4,IGF2,IKZF3,LIPA,MYH6,NRP1,PRCP,TNFRSF11A
	ADAM12		peptidase		-1.387		0.00434	CCN2,CFD,FBLN7,IGFBP6,TGFBI	53 (6)
	OGA		enzyme		-1.414		3.93e-05	ADAP1,APOBEC1,C1QA,C1QB,C3AR1,CD93,CPE,CYFIP2,DPEP1,FGFR1,GSN,IGF2,IP6K3,PLCE1,PLD4,PLIN2,TGFB1,TGFBI
	STS		enzyme		-1.414		0.000937	ADGRE1,CEBPD,FABP4,UCP2	52 (7)
	curcumin		chemical drug		-1.425		0.00379	ABCG1,BCL2L11,CCN2,CYP2E1,FGFR1,FTL,IL10RB,ITGAM,KLF9,MMP2,PTGIS,TNFRSF11A,UCP2	139 (16)
	PP2/AG1879 tyrosine kinase inhibitor		chemical drug		-1.446		0.00701	ACE,BCL2L11,CCN2,ITGAM,PTPRJ	112 (14)
	enalapril		biologic drug		-1.455		0.00153	ACE,CCN2,FBLIM1,MMP2,TGFB1,UCP2	99 (9)
	IL4		cytokine		-1.5		6.03e-09	ADAM8,ADAP1,ADGRE1,ANXA4,ATP1A3,C5AR1,CD200R1,CD8A,CD8B,CIITA,CKB,CYP2E1,DOCK10,FABP4,FNIP2,FPR1,HLA-DMB,HLA-DQA1,HLA-DQB1,IRF5,ITGAX,ITGB2,KCNAB2,KSR1,LCP2,LPIN2,MAF,MMP12,MMP2,NRP1,PINK1,PLIN2,POU2F2,PREX1,PTPN7,RASGEF1B,RASSF4,RNPEP,SIRPA,SIRPB1,TGFB1,TGFBI,TMTC1,TNFRSF11A	139 (13)
	NOS2		enzyme		-1.508		9.33e-05	CALML5,CAV3,CFD,COX7A1,CYP2E1,FABP4,GPD1,MYH6,PC,SERPINA3,TGFB1	82 (7)
	IRF8		transcription regulator		-1.577		0.00482	ADGRE1,ASAH1,CIITA,IRF5,ITGAM,MAF,ZEB2	101 (9)
	CD28	-0.942	transmembrane receptor		-1.605		5.72e-05	CD226,CD28,FYB1,HAVCR2,HLA-DQB1,IGFBP6,IL10RB,LCP1,MAF,MMP2,NAIP,PTGER4,PTPRJ,RNF128,SH2D2A,TNFRSF11A	77 (8)
	8-bromo-cAMP		chemical reagent		-1.617	bias	2.27e-05	ACE,ASAH1,CCN2,CFD,CKB,CTSB,ENTPD1,FGFR1,GM2A,GNS,GSN,IGF2,LAMA2,LAMB2,LGMN,LIPA,MYH6,NRP1,PPT1,SFRP4,TGFB1	159 (18)
	paraquat		chemical toxicant		-1.628		5.28e-05	ADGRE1,CCN2,CEBPD,ITGAM,LPIN2,MMP12,PLCE1,SLC8A1,TGFB1	115 (14)
	ELOVL3		enzyme		-1.633		0.000485	C3AR1,IGSF6,ITGB2,LIPA,MMP2,PLA2G7
	GATA2		transcription regulator		-1.664		0.0375	CCN3,CD226,CD300LD,FABP4,FGD4,GRAP2,ITGAM,MMP2,MYO18B,PIK3CG,RCAN1
	TET2		enzyme		-1.667		0.000216	ADAM8,APOBEC1,ATP1A3,BCL2L11,C5AR1,CHST11,GRAP2,ITGAX,ITGB2
	IgG		complex		-1.67		0.00209	ASAH1,CEBPD,ENTPD1,INPP5D,ITGAM,ITGB2,LY9,MAF,MMP12,MMP2,PTGER4,TGFB1	121 (16)
	8-chlorophenylthio-adenosine 3',5'-cyclic monophosphate		chemical reagent		-1.673		8.36e-05	BCL2L11,CEBPD,LPIN2,NAIP,Naip1 (includes others),SH2D2A
	PML		transcription regulator		-1.698		0.00014	ACACB,ANXA4,CIITA,CPE,FTL,HLA-DMB,MAF,SCD,TBX2,UCP2	49 (5)
	salmonella minnesota R595 lipopolysaccharides		chemical - endogenous non-mammalian		-1.718	bias	0.00176	ARHGAP25,CEBPD,FPR1,HLA-DMB,HLA-DQA1,PILRA,PTPRJ
	estradiol benzoate		chemical drug		-1.718		0.0285	ACACB,PTGER4,TGFB1,UCP2
	palmitic acid		chemical - endogenous mammalian		-1.739		0.000511	ADCYAP1R1,BCL2L11,CCN2,CD28,CPE,CTSB,FABP4,PLIN2,SCD,SLC25A4,TGFB1,UCP2	148 (18)
	SP600125		chemical drug		-1.765		0.0156	BCL2L11,CCN2,CYGB,GNS,HAS1,LAPTM5,MMP12,MYH6,SCD,TGFB1
	NFAT5		transcription regulator		-1.767		0.0225	CIITA,HLA-DMB,HLA-DQA1,HLA-DQB1,PLIN2,PTGIS
	Ige		complex		-1.809		3.87e-07	ADAM8,BCL2L11,CARD11,CHST11,FGD2,FXYD6,GSN,HAVCR2,ITGAX,LCP2,NRP1,PILRA,PLA2G12A,RAB7B,SCD,SDC3,SLC11A1,SLC37A2,TGFB1	102 (7)
	PTEN		phosphatase		-1.867		0.000254	BCL2L11,CADM3,CFD,CTSB,FABP4,FES,FGFR1,GNG2,IGF2,IGFBP6,INMT,MMP2,NAIP,Naip1 (includes others),PINK1,PREX1,SCD,SLC25A45,SLC7A8,TGFB1,TMEM106A,Tmsb4x (includes others),ZEB2	157 (18)
	FOS		transcription regulator		-1.897		3.7e-05	ANXA4,BCL2L11,C3AR1,CCN2,CFD,CTSB,CTSH,FABP4,FBLIM1,GM2A,HAS1,IGFBP6,MMP2,MYH6,SCD,SEMA3B,SEMA3E,SFRP4,SIRPA,TGFB1,TGFBI,TNFRSF11A	123 (12)
	IL18		cytokine		-1.912		0.022	CD226,ENPP2,GIMAP4,HAVCR2,INPP5D,ITGAM,NCR1
	MSTN		growth factor		-1.951		0.0204	CAV3,DES,IGF2,TGFB1
	trinitrobenzenesulfonic acid		chemical reagent		-1.951	bias	0.0469	ADAM8,ITGAM,MMP12,TGFB1
	WNT5A		cytokine		-1.964		0.022	ENPP2,FABP4,LCP1,SEMA3E,TGFB1,TLR1,TNFRSF11A
	C5		cytokine		-1.965		0.0354	C3AR1,C5AR1,ITGAM,ITGB2,TGFB1
	LGALS1		other		-1.966		0.0232	MAF,MMP12,MMP2,TGFB1
	B2M		transmembrane receptor		-1.98		0.000724	CD8A,CD8B,HLA-DQA1,HLA-DQB1	73 (7)
	tert-butyl-hydroquinone		chemical reagent		-1.982	bias	0.0469	FTL,ITGAM,MAF,RASSF2
	STAT4		transcription regulator		-1.992	bias	0.0428	ACAP1,BCL2L11,FYB1,HLA-DQB1,KLF9,RNF128,VSIR
	HRG		other	Inhibited	-2	bias	0.000163	C1QA,C1QB,HLA-DQA1,ITGAX
	CFB		peptidase	Inhibited	-2		0.00106	C3AR1,C5AR1,ITGAM,MYH6	23 (3)
	ITK		kinase	Inhibited	-2		0.0333	MAF,MYO1F,NCR1,PREX1
	medroxyprogesterone acetate		chemical drug	Inhibited	-2.008		2.38e-05	ASAH1,BCL2L11,CFD,CKB,CTSB,ENPP2,FGFR1,GM2A,GNS,GSN,IGF2,ITGB2,LAMA2,LAMB2,LGMN,LIPA,PPT1,SCD,SFRP4,TGFB1	142 (9)
	daidzein		chemical drug	Inhibited	-2.121		6.93e-05	ABCG1,FERMT3,HLA-DQA1,ITGB2,LAPTM5,LCP2,LY86,ZEB2
	IL12 (complex)		complex	Inhibited	-2.135		0.0104	ADGRE1,CD226,CD28,HAVCR2,ITGB2,MMP2,NCR1,TGFB1
	BHLHE40		transcription regulator	Inhibited	-2.138		0.00024	C3AR1,FPR1,HAS1,HAVCR2,HEXA,IPCEF1,IRF5,LCP2,NTRK3,PLIN2,SLAMF6,ST3GAL5,TLR1,TLR6
	CD44		other	Inhibited	-2.157		0.00327	ADAM8,ADGRE1,CD8A,CD8B,ITGAX,MMP12,MMP2,PTP4A3,TNFRSF11A	147 (16)
	Interferon alpha		group	Inhibited	-2.17		0.00264	AIM2,C3AR1,CD8A,CIITA,COX7A1,CYP2E1,DYNLT1,ENPP2,GIMAP4,IRF5,ITGAM,NCR1,PARVG,TGFB1,TLR1	111 (11)
	IL7		cytokine	Inhibited	-2.183		0.0195	BCL2L11,CD3G,CD8A,CD8B,HAVCR2,MAF
	RUNX3		transcription regulator	Inhibited	-2.2		1.88e-05	BCL2L11,CCN2,CIITA,ITGAM,ITGAX,LILRB3,MMP2,SCARA3,ST3GAL5,TGFB1
	EBI3		cytokine	Inhibited	-2.213		0.0014	CIITA,ENTPD1,HAVCR2,HLA-DMB,HLA-DQA1	105 (10)
	TPH1		enzyme	Inhibited	-2.216	bias	0.00667	GIMAP4,GNPDA1,LGMN,PLA2G7,SLAMF6	52 (5)
	cholesterol		chemical - endogenous mammalian	Inhibited	-2.218		0.000718	ABCG1,ADGRE1,DES,IL10RB,ITGAM,ITGAX,LAPTM5,MMP2,PLIN2,SCD,TGFB1	101 (15)
	semaxinib		chemical drug	Inhibited	-2.219		5.94e-07	C1QA,C1QB,CARD11,CD28,CD3G,CD8A,CD8B,GRAP2,HAVCR2,PTGIS,SLAMF6,TGFB1	47 (4)
	FOXP3		transcription regulator	Inhibited	-2.219		0.000282	BCL2L11,CD200R1,CD226,ENTPD1,MAF,MMP2,NRP1,NTRK3,TGFB1,ZEB2	138 (13)
	17-alpha-ethinylestradiol		chemical drug	Inhibited	-2.219		0.0252	ADGRE1,C1QB,CKB,LY86,SLC11A1,SPOCK2
	concanavalin a		chemical drug	Inhibited	-2.219	bias	0.0419	BCL2L11,ITGB2,PTPN7,SIPA1,TGFB1
	Hbb-b2		other	Inhibited	-2.236	bias	3.7e-06	BCL2L11,C1QA,CIITA,CMTM3,FTL,ITGAM,LY86
	CAMP		other	Inhibited	-2.236		0.0173	C5AR1,ITGAM,ITGAX,ITGB2,TGFB1
	TCR		complex	Inhibited	-2.246		0.000108	AIM2,APOD,BCL2L11,CD28,CD8B,CTSB,GNPDA1,LCP2,LIPA,LPIN2,MAF,NRP1,RNF128,SDCBP,SERPINA3,TGFB1	121 (12)
	cardiotoxin		chemical - other	Inhibited	-2.333	bias	3.24e-09	C5AR1,CTSB,CTSH,FGFR1,FPR1,GM2A,GSN,IGF2,IL10RB,ITGAM,ITGB2,LY86,MMP12,MMP2,MS4A8,MYF6,SNX5,TGFB1,UCP2
	tamoxifen		chemical drug	Inhibited	-2.335		0.00024	ASAH1,CEBPD,CPE,CYP2E1,FABP4,IGF2,MMP2,PTGER2,SCD,SDC3,SEMA3B,SERPINA3,UCP2,ZEB2	137 (21)
	SPI1		transcription regulator	Inhibited	-2.391		0.0115	ADGRE1,C3AR1,CIITA,FES,FLI1,ITGAM,ITGB2,LILRB3,MMP2,PIK3CG
	IL27		cytokine	Inhibited	-2.418		0.000266	ADGRE1,CEBPD,CIITA,HLA-DMB,HLA-DQA1,HLA-DQB1,IL10RB,ITGAM,MAF	139 (16)
	BID		other	Inhibited	-2.449		2.61e-07	C3AR1,C5AR1,CTSB,CTSH,ITGAX,MMP12	125 (11)
	Hbb-b1		transporter	Inhibited	-2.449	bias	5.52e-05	BCL2L11,C1QA,CIITA,CMTM3,FTL,ITGAM,LY86,UCP2	93 (7)
	mir-223		microRNA	Inhibited	-2.449		0.0173	APOBEC1,C5AR1,CARD11,CD93,FNIP2,TGFBI
	E. coli serotype 0127B8 lipopolysaccharide		chemical - endogenous non-mammalian	Inhibited	-2.449		0.0485	CCN2,CHST11,GNG2,IRF5,LAMB2,P2RY6
	STAT1		transcription regulator	Inhibited	-2.472		0.00117	ACE,BCL2L11,CCN2,CEBPD,CIITA,CYP2E1,HAVCR2,HLA-DQA1,IRF5,ITGAX,PLIN2,SERPINA3,SLC8A1,TGFB1,UCP2	131 (16)
	IL2		cytokine	Inhibited	-2.478		3.45e-09	ADAM8,ARHGAP25,CD200R1,CD28,CD3G,CD8A,CD8B,CORO2A,CTSW,DHCR24,ENPP2,ENTPD1,FGFR1,HAVCR2,HLA-DQA1,HLA-DQB1,IKZF3,LAPTM5,LCP2,MAF,MMP2,NCR1,NRP1,PTGER2,PTPN7,PTPRJ,RASGEF1B,RFTN1,RNF128,SIPA1,SLA,TGFB1,TNFRSF11A	144 (16)
	TGM2		enzyme	Inhibited	-2.499		0.000103	C5AR1,CD300C,CD93,GM2A,ITGAM,ITGAX,MMP2,NLRC4,PLEKHO2,SDCBP,SIRPA,TGFB1	35 (3)
	lipopolysaccharide		chemical drug	Inhibited	-2.515		2.54e-18	ABCG1,ACE,ADGRE1,AIM2,APEX1,APOBEC1,BCL2L11,C1QA,C3AR1,C5AR1,CALML5,CCN2,CD28,CD300LD,CD8A,CEBPD,CFD,CIITA,COX7A1,CRHR2,CTSB,CYP2E1,DHCR24,DOCK10,ENPP2,ENTPD1,FABP4,FES,FLI1,FPR1,FYB1,Gbp8,GPD1,GSN,HAS1,HEXA,HLA-DMB,HLA-DQA1,HLA-DQB1,IGSF6,IKZF3,IL10RB,INPP5D,IRF5,ITGAM,ITGAX,ITGB2,KCNAB2,LASP1,LCP2,LIPA,LPIN2,LY86,MAF,MAP3K6,MMP12,MMP2,NRP1,P2RX4,P2RY6,PC,PCOLCE2,PID1,PIK3CG,PLA2G7,PLD4,PLIN2,PO…	156 (14)
	ShK-223		chemical reagent	Inhibited	-2.53		2.38e-06	C3AR1,DOCK2,IGSF6,IL10RB,ITGAM,LGMN,PIK3CG,PLCG2,RGL1,TMEM100
	E. coli B4 lipopolysaccharide		chemical toxicant	Inhibited	-2.538		0.00783	ADCY7,C1QB,FBLIM1,FPR1,INPP5D,LCP1,LCP2,LILRB3,Plscr2,RAB7B
	ZBTB10		other	Inhibited	-2.646	bias	0.00763	ADAM8,BCL2L11,CD8A,IL10RB,Klre1,LY9,SASH3
	TNF		cytokine	Inhibited	-2.725		2.69e-08	ACE,ADAM8,ANPEP,BCL2L11,C3AR1,C5AR1,CCN2,CCN3,CD28,CDO1,CEBPD,CFD,CHST11,CIITA,COTL1,CTSB,CYP2E1,ENPP2,FABP4,FGFR1,FPR1,GM2A,GPD1,HAS1,HEXA,IGF2,IGFBP6,INPP5D,IRF5,ITGA10,ITGAM,ITGAX,ITGB2,MMP12,MMP2,NAIP,NRP1,P2RY6,PC,PIK3CG,PLIN2,RASD1,RCAN1,RFTN1,RND1,SCD,SERPINA3,SLC11A1,SLC43A2,SLC7A8,SLC8A1,ST3GAL5,TBXAS1,TGFB1,TLR1,TLR6,TNFRSF11A,UCP2,VSIR	145 (16)
	IL33		cytokine	Inhibited	-2.749		2.51e-12	ABCG1,ATP8B4,BCL2L11,CD28,CHST11,Clec4a3,DOCK2,ENTPD1,FGD2,FPR1,HAVCR2,IKZF3,IRF5,ITGAM,ITGAX,MMP12,NRP1,PILRA,PLIN2,POU2F2,PTGER4,RASSF4,SLC11A1,ST3GAL5,TGFB1,TIFAB,ZEB2	149 (15)
	tetradecanoylphorbol acetate		chemical drug	Inhibited	-2.935		2.45e-07	ACE,ADAM8,ATP1A3,C3AR1,C5AR1,CCN2,CD226,CD28,CIITA,CPE,CTSB,CTSH,CYP2E1,DES,HAS1,IGF2,IGFBP6,IKZF3,ITGAM,ITGAX,ITGB2,LBH,LIPA,MAF,MMP12,MMP2,MYH1,NCR1,NRP1,POU2F2,PTAFR,PTGER2,PTGER4,PTPRJ,RCAN1,SERPINA3,SLC11A1,TBXAS1,TGFB1,TLR1,TLR6	163 (16)
	CSF2		cytokine	Inhibited	-3.134	bias	1.6e-08	ABCG1,ACE,ADAM8,BCL2L11,C5AR1,CARD11,CD28,CD8A,CHST11,CIITA,FBXO31,HLA-DQB1,INPP5D,IRF5,ITGAM,ITGAX,LCP1,LY9,MMP2,NRP1,PIK3CG,PTGER2,PTGER4,TGFB1,TGFBI,TLR1,TNFRSF11A	158 (19)
	AHR		ligand-dependent nuclear receptor	Inhibited	-3.144		1.49e-07	ADGRE1,C1QA,C1QB,CARD11,CD28,CD3G,CD8A,CD8B,CERS2,ENTPD1,FABP4,GRAP2,HAVCR2,IKZF3,ITGAM,MMP2,PLA2G12A,SCD,SLAMF6,SLC16A10,SNTA1,TGFB1,TGFBI
	IFNG		cytokine	Inhibited	-3.751		3.38e-06	ACE,ADCY7,AIM2,BCL2L11,C1QA,C1QB,C5AR1,CCN2,CEBPD,CHST11,CIITA,CTSB,CTSH,CYP2E1,DDR2,ENTPD1,FTL,Gbp8,GNG2,HLA-DMB,HLA-DQA1,HLA-DQB1,IRF5,ITGAM,ITGAX,ITGB2,LAMB2,LCP2,MMP12,MMP2,P2RY6,PARVG,PLA2G7,PTAFR,SLC11A1,SLC8A1,SPON1,TBXAS1,TGFB1,TLR1,TLR6,Tmsb4x (includes others),TNFRSF11A,UCP2,ZEB2	136 (14)
	genistein		chemical drug	Inhibited	-4.552		3.98e-11	ACE,ASAH1,CCN2,CD8A,CFD,CTSB,CTSH,FERMT3,GM2A,GNS,HAS1,HEXA,HLA-DQA1,ITGB2,LAPTM5,LCP2,LGMN,LIPA,LY86,MMP2,PLA2G7,PPT1,PTAFR,SLC11A1,SLC36A1,TGFB1,ZEB2	168 (16)

## Sheet: d cytokine USRs
Cytokine USRs inhibited by MitoTEMPO treatment. Cytokine USRs from c with negative z-score	Upstream Regulator	Expr Log Ratio	Molecule Type	Predicted Activation State	Activation z-score	Flags	p-value of overlap	Target Molecules in Dataset	Mechanistic Network
	WNT3A		cytokine		-0.045		0.0245	ALPK2,BCL2L11,CCN2,CFD,FABP4,LBH,MYH6,TGFB1,TNXB,WIF1
	CXCL8		cytokine		-0.256		0.000212	CPE,HAS1,ITGAM,ITGAX,ITGB2,MAPK12,MMP2	93 (14)
	IL13		cytokine		-0.269		6.25e-09	ADAM8,C3AR1,CCN2,CLEC4A,CTSB,CTSH,DHCR24,ENPP2,FABP4,FGD2,GSN,LILRB3,LIPA,MAF,MMP12,MMP2,PID1,PLIN2,RFTN1,SLA,SLC8A1,TGFB1,TLR1,TNFRSF11A,TNXB	132 (15)
	IL10		cytokine		-0.27		1.14e-06	ASAH1,BCL2L11,CD28,CIITA,CTSB,CTSH,FPR1,GNS,HEXA,HLA-DQB1,INPP5D,ITGAM,LGMN,LIPA,MAF,MMP2,PIK3CG,PTAFR,SLC11A1,TGFB1,TLR1,TNFRSF11A	152 (19)
	EDN1		cytokine		-0.402	bias	0.0292	ANXA4,CCN2,ITGAM,MMP2,PTGER2,PTGER4,SLC8A1
	CSF3		cytokine		-0.412		1.75e-06	ADGRE1,C3AR1,CD300LD,CEBPD,DES,ENPP2,ENTPD1,FPR1,HLA-DQA1,ITGAM,ITGB2,MMP2,TGFB1	139 (17)
	IL3		cytokine		-0.478		3.67e-05	ADGRE1,BCL2L11,C1QA,CCN3,CD3G,FGFR1,ITGAM,ITGAX,KLF9,LY9,NRP1,PAPPA2,PLA2G7,SERPINA3,TNFRSF11A,UCP2	93 (8)
	IL6		cytokine		-0.631		4.77e-06	ADGRE1,ANPEP,BCL2L11,C5AR1,CCN2,CEBPD,CFD,CIITA,CYP2E1,ENPP2,FLI1,HLA-DQA1,IGF2,IGFBP6,ITGAM,LY86,MACROD1,MAF,MMP12,MMP2,PTGER4,PTP4A3,SERPINA3,TBC1D9,TBXAS1,TGFB1,TLR1,TLR6,TNFRSF11A	155 (17)
	PRL		cytokine		-0.657		0.00265	CEBPD,CTSB,CTSH,DES,IGF2,MICOS10-NBL1/NBL1,PC,RASD1,SERPINA3,TGFB1,Tmsb4x (includes others)	164 (19)
	TNFSF11		cytokine		-0.743	bias	0.000528	ADGRE1,C3AR1,CKB,FERMT3,FPR1,ITGAM,PTGER2,PTGER4,RCAN1,RGL1,TGFB1,TNFRSF11A	113 (12)
	IL21		cytokine		-1.112		0.00396	BCL2L11,CD28,HAVCR2,IRF5,MMP12,MMP2,NCR1,TGFB1	116 (15)
	CSF1		cytokine		-1.316		2.73e-07	BCL2L11,C5AR1,CTSH,DHCR24,FERMT3,GRAP2,IRF5,ITGAM,ITGAX,MMP12,PTPRJ,SIRPB1,SLC37A2,TGFB1,TLR1,TLR6,TNFRSF11A	150 (16)
	IL4		cytokine		-1.5		6.03e-09	ADAM8,ADAP1,ADGRE1,ANXA4,ATP1A3,C5AR1,CD200R1,CD8A,CD8B,CIITA,CKB,CYP2E1,DOCK10,FABP4,FNIP2,FPR1,HLA-DMB,HLA-DQA1,HLA-DQB1,IRF5,ITGAX,ITGB2,KCNAB2,KSR1,LCP2,LPIN2,MAF,MMP12,MMP2,NRP1,PINK1,PLIN2,POU2F2,PREX1,PTPN7,RASGEF1B,RASSF4,RNPEP,SIRPA,SIRPB1,TGFB1,TGFBI,TMTC1,TNFRSF11A	139 (13)
	IL18		cytokine		-1.912		0.022	CD226,ENPP2,GIMAP4,HAVCR2,INPP5D,ITGAM,NCR1
	WNT5A		cytokine		-1.964		0.022	ENPP2,FABP4,LCP1,SEMA3E,TGFB1,TLR1,TNFRSF11A
	C5		cytokine		-1.965		0.0354	C3AR1,C5AR1,ITGAM,ITGB2,TGFB1
	IL7		cytokine	Inhibited	-2.183		0.0195	BCL2L11,CD3G,CD8A,CD8B,HAVCR2,MAF
	EBI3		cytokine	Inhibited	-2.213		0.0014	CIITA,ENTPD1,HAVCR2,HLA-DMB,HLA-DQA1	105 (10)
	IL27		cytokine	Inhibited	-2.418		0.000266	ADGRE1,CEBPD,CIITA,HLA-DMB,HLA-DQA1,HLA-DQB1,IL10RB,ITGAM,MAF	139 (16)
	IL2		cytokine	Inhibited	-2.478		3.45e-09	ADAM8,ARHGAP25,CD200R1,CD28,CD3G,CD8A,CD8B,CORO2A,CTSW,DHCR24,ENPP2,ENTPD1,FGFR1,HAVCR2,HLA-DQA1,HLA-DQB1,IKZF3,LAPTM5,LCP2,MAF,MMP2,NCR1,NRP1,PTGER2,PTPN7,PTPRJ,RASGEF1B,RFTN1,RNF128,SIPA1,SLA,TGFB1,TNFRSF11A	144 (16)
	TNF		cytokine	Inhibited	-2.725		2.69e-08	ACE,ADAM8,ANPEP,BCL2L11,C3AR1,C5AR1,CCN2,CCN3,CD28,CDO1,CEBPD,CFD,CHST11,CIITA,COTL1,CTSB,CYP2E1,ENPP2,FABP4,FGFR1,FPR1,GM2A,GPD1,HAS1,HEXA,IGF2,IGFBP6,INPP5D,IRF5,ITGA10,ITGAM,ITGAX,ITGB2,MMP12,MMP2,NAIP,NRP1,P2RY6,PC,PIK3CG,PLIN2,RASD1,RCAN1,RFTN1,RND1,SCD,SERPINA3,SLC11A1,SLC43A2,SLC7A8,SLC8A1,ST3GAL5,TBXAS1,TGFB1,TLR1,TLR6,TNFRSF11A,UCP2,VSIR	145 (16)
	IL33		cytokine	Inhibited	-2.749		2.51e-12	ABCG1,ATP8B4,BCL2L11,CD28,CHST11,Clec4a3,DOCK2,ENTPD1,FGD2,FPR1,HAVCR2,IKZF3,IRF5,ITGAM,ITGAX,MMP12,NRP1,PILRA,PLIN2,POU2F2,PTGER4,RASSF4,SLC11A1,ST3GAL5,TGFB1,TIFAB,ZEB2	149 (15)
	CSF2		cytokine	Inhibited	-3.134	bias	1.6e-08	ABCG1,ACE,ADAM8,BCL2L11,C5AR1,CARD11,CD28,CD8A,CHST11,CIITA,FBXO31,HLA-DQB1,INPP5D,IRF5,ITGAM,ITGAX,LCP1,LY9,MMP2,NRP1,PIK3CG,PTGER2,PTGER4,TGFB1,TGFBI,TLR1,TNFRSF11A	158 (19)
	IFNG		cytokine	Inhibited	-3.751		3.38e-06	ACE,ADCY7,AIM2,BCL2L11,C1QA,C1QB,C5AR1,CCN2,CEBPD,CHST11,CIITA,CTSB,CTSH,CYP2E1,DDR2,ENTPD1,FTL,Gbp8,GNG2,HLA-DMB,HLA-DQA1,HLA-DQB1,IRF5,ITGAM,ITGAX,ITGB2,LAMB2,LCP2,MMP12,MMP2,P2RY6,PARVG,PLA2G7,PTAFR,SLC11A1,SLC8A1,SPON1,TBXAS1,TGFB1,TLR1,TLR6,Tmsb4x (includes others),TNFRSF11A,UCP2,ZEB2	136 (14)
