# Supplementary material for: Widespread discrepancy in Nnt genotypes and genetic backgrounds complicates granzyme A and other knockout mouse studies
Source: eLife. 2022 Feb 4;11:e70207. doi: 10.7554/eLife.70207 (PMC8816380; doi:10.7554/eLife.70207)
Supplement: Supplementary file 6. — Datasets for RNA-Seq, Ingenuity Pathway Analysis (IPA), and Cytoscape analyses of mice feet and spleen taken 6 hr after injection with poly(I:C); GzmaS211A vs. 6J. [file elife-70207-supp6.xlsx]

## Sheet: a AllgenesGzmaS211A+polyIC feet
RNA-Seq of feet taken at 6 hours after injection with poly(I:C) from GzmaS211A versus 6J mice (GzmaS211A+polyIC vs 6J+polyIC, NCBI Bioproject PRJNA666748), all genes	Ensembl	GeneID	logFC	logCPM	F	PValue	FDR	C57Feet1	C57Feet2	C57Feet3	S211AFeet1	S211AFeet2	S211AFeet3
	ENSMUSG00000025202.8	Scd3	1.00141	7.09211	300.839	3.69217e-15	2.04624e-10	3234.18	3289.44	3459.4	7147.24	7588.76	5981.71
	ENSMUSG00000083012.9	Fam220a	2.51454	2.28594	281.738	7.70282e-15	2.13449e-10	57.45	46.5	53.45	300.09	291.62	332.76
	ENSMUSG00000041984.2	Rptn	-1.2975	4.80206	261.92	3.52594e-13	6.5137e-09	1401	1246	1734	582	634	609
	ENSMUSG00000108022.1	Gm7298	-0.81065	6.35762	171.274	1.78388e-12	2.47162e-08	3874.99	3410.98	4227	2369	2551	1871.99
	ENSMUSG00000038242.12	Aox4	-1.20166	3.35331	158.297	4.11597e-12	4.56222e-08	540.91	458.71	564.46	235.43	249.29	216.15
	ENSMUSG00000043421.8	Hilpda	-0.900501	4.64336	135.549	2.083e-11	1.92403e-07	1182	1031	1377	658	766	560
	ENSMUSG00000078087.5	Rps12l1	-4.15074	-0.212858	131.338	2.8844e-11	2.28366e-07	57.45	58.88	54.46	3.91	4.92	0.8
	ENSMUSG00000044594.14	Serpinb3a	-0.783754	4.73977	107.376	2.21972e-10	1.36688e-06	1180.46	1089.62	1459.93	742.12	737.04	740.55
	ENSMUSG00000095595.2	Fam177a	-0.650545	5.58263	107.772	2.13981e-10	1.36688e-06	1968.48	2035.39	2448.76	1384.78	1545.52	1303.24
	ENSMUSG00000030157.5	Clec2d	0.594055	6.83043	104.844	2.81392e-10	1.49936e-06	3302	3260	3394	5645	5407	4527
	ENSMUSG00000032908.9	Sgpp2	-0.721141	4.90907	104.254	2.97593e-10	1.49936e-06	1411.92	1160.44	1552	916.4	919.75	743.83
	ENSMUSG00000105837.4	Gm35986	1.96314	0.774872	97.3215	5.85968e-10	2.70625e-06	23	22	29	102	101	95
	ENSMUSG00000041132.11	N4bp2l1	-0.850377	3.65819	77.8696	4.9473e-09	2.10911e-05	584	583	612	317.35	343	355
	ENSMUSG00000079480.3	Pin4	-0.913663	2.96883	75.3282	6.73706e-09	2.66696e-05	378.41	347.58	393.67	200.38	231.72	182.15
	ENSMUSG00000024206.15	Rfx2	-0.721918	4.11654	68.0612	1.70621e-08	5.90999e-05	713	708	962	468	541	473
	ENSMUSG00000038007.14	Acer2	0.501821	6.23885	68.4882	1.61228e-08	5.90999e-05	2281	2277	2298	3379	3706	2980
	ENSMUSG00000029098.17	Acox3	0.433291	7.49204	59.9009	5.31728e-08	0.000173346	5252.96	5595.78	5991.77	7983.73	8289.9	7217.26
	ENSMUSG00000019232.14	Etnppl	-1.34755	1.23163	58.5156	6.52106e-08	0.000200203	128	100	137	59	52	37
	ENSMUSG00000020185.16	E2f7	-0.64808	3.92289	57.529	7.55738e-08	0.000200203	608	626	806	485	467	389
	ENSMUSG00000062345.10	Serpinb2	-0.489563	6.47412	60.0342	7.58605e-08	0.000200203	3639.67	3444.62	4374.46	2903.24	2696.03	2769.47
	ENSMUSG00000091618.3	H60c	-0.542886	5.56061	62.3505	7.36876e-08	0.000200203	1977.8	1993.95	2178.81	1382.86	1480.87	1477.85
	ENSMUSG00000021091.8	Serpina3n	0.496129	9.04169	60.4719	1.13786e-07	0.000286151	15674.1	15684.9	16691	26957	23229	20065
	ENSMUSG00000073079.6	Srp54a	-0.434161	5.75316	54.5798	1.18754e-07	0.000286151	2324.51	2138.03	2346.82	1780.32	1876.84	1556.74
	ENSMUSG00000081362.3	Cyp2j7	0.738052	3.79465	55.6998	2.33554e-07	0.000539324	379	401	354	694	736	540
	ENSMUSG00000038112.15	AW551984	0.503599	4.73216	49.377	2.75414e-07	0.000610548	817	724	876	1337	1176	1027
	ENSMUSG00000071192.6	Wfikkn1	-0.59069	3.88319	46.6218	4.40896e-07	0.000904996	678	571	699	442	447	441
	ENSMUSG00000090942.1	F830016B08Rik	1.26955	1.03441	46.7818	4.28796e-07	0.000904996	37	44	47	130	103	87
	ENSMUSG00000090698.2	Apold1	-0.652816	3.89723	48.0486	4.66831e-07	0.000924009	572	600	839	447	479	388
	ENSMUSG00000056656.6	Apol8	-0.947681	1.81981	45.3763	5.48794e-07	0.00104878	170	151	185	96	88	86
	ENSMUSG00000056836.8	Gm6851	-0.995761	1.88213	43.7556	7.34137e-07	0.00135622	166.91	154.42	214.75	79.31	98.68	97.12
	ENSMUSG00000039220.16	Ppp1r10	0.431498	5.07259	43.317	7.95267e-07	0.00137733	1054	1029	1058	1506	1504	1369
	ENSMUSG00000070609.3	Aadacl4	0.492785	5.74835	50.5209	7.70507e-07	0.00137733	1643	1681	1563	2444	2520	2170
	ENSMUSG00000047889.9	Serpinb6d	-1.42586	1.06671	46.4655	8.30661e-07	0.00139503	85	95	151	34	54	38
	ENSMUSG00000021573.15	Tppp	-0.554258	4.80459	48.8717	8.6114e-07	0.00140368	1176	1053	1441	802	903	855
	ENSMUSG00000003752.9	Itpkc	-0.373854	7.2922	42.2849	9.61984e-07	0.00152326	6335.92	5860.09	7320.45	5209.12	5234.69	5023.34
	ENSMUSG00000020553.8	Pctp	0.802157	2.63012	41.4888	1.11642e-06	0.00169068	142	185	163	308	304	273
	ENSMUSG00000021207.9	Akr1c21	1.09308	4.66613	104.471	1.15924e-06	0.00169068	565	648	556	1232	1432	1247
	ENSMUSG00000095213.2	Gm9944	-0.467722	4.37336	41.4094	1.13324e-06	0.00169068	849	810	988	716	689	571
	ENSMUSG00000029471.13	Camkk2	0.359309	5.9999	40.5769	1.32711e-06	0.00178552	2082	1936	2142	2903	2860	2413
	ENSMUSG00000035828.11	Pim3	-0.385932	7.82827	40.564	1.33038e-06	0.00178552	8906	8418	11135	7360	7819	7160
	ENSMUSG00000042638.14	Gucy2c	1.9218	0.0493243	43.1076	1.35313e-06	0.00178552	8	12	25	51	61	63
	ENSMUSG00000084897.1	Gm14226	1.52379	1.10787	48.9892	1.27637e-06	0.00178552	35	46	37	157	120	78
	ENSMUSG00000041238.16	Rbbp8	0.384879	5.89213	40.0504	1.46805e-06	0.00189212	1892.7	1861.51	1894.68	2597.41	2625.91	2401.67
	ENSMUSG00000071281.12	Zfp65	0.733668	2.72993	39.6848	1.57546e-06	0.0019844	168	192	182	307	321	303
	ENSMUSG00000014846.12	Tppp3	-0.381907	7.20346	39.4523	1.64817e-06	0.00202985	5708	5518	7201	4708	5275	4543
	ENSMUSG00000112449.1	Srp54b	-0.671722	4.88645	59.6983	1.72383e-06	0.00207687	1308.52	1181.93	1515.92	968.86	976.61	660.17
	ENSMUSG00000118030.1	Gm50163	-4.00268	-1.78069	38.9641	1.81295e-06	0.00213778	10.67	19.85	19.68	0	1.27	1.6
	ENSMUSG00000055866.9	Per2	-0.399272	4.98714	38.0666	2.16444e-06	0.00249908	1249	1281	1436	1121	1098	892
	ENSMUSG00000054200.7	Ffar4	-1.00009	1.28917	37.8426	2.26325e-06	0.00255983	120	108	124	67	66	49
	ENSMUSG00000071856.10	Mcc	-0.354649	5.80632	37.6748	2.34047e-06	0.00256975	2231.79	2197.07	2478.07	1842.2	1964.25	1761.9
	ENSMUSG00000072949.6	Acot1	0.425853	5.2713	37.5723	2.41113e-06	0.00256975	1067.92	1250.23	1300.78	1821.91	1739.07	1470.79
	ENSMUSG00000080058.2	Gm11175	-1.25543	0.905075	37.6083	2.37185e-06	0.00256975	98.42	94.11	90.54	29.37	50.66	42.27
	ENSMUSG00000035385.5	Ccl2	-0.394735	5.97662	37.9041	2.50321e-06	0.00261755	2286	2573	3026	2121	2240	1826
	ENSMUSG00000029919.5	Hpgds	0.422674	4.57294	37.2082	2.57055e-06	0.00263819	727	708	798	1126	1065	904
	ENSMUSG00000042677.7	Zc3h12a	-0.36249	5.63932	36.3535	3.05825e-06	0.00302663	2027	1850	2302	1657	1699	1585
	ENSMUSG00000053113.3	Socs3	-0.396248	8.26682	39.0314	3.01187e-06	0.00302663	12273	11101	15354	10169	11215	8889
	ENSMUSG00000060560.8	Ces4a	0.368168	6.11089	36.2593	3.1179e-06	0.00303153	2040	2253	2333	3158	3167	2540
	ENSMUSG00000058017.6	Serpinb3d	-0.807075	2.19847	36.1136	3.21253e-06	0.00306969	193	191	255	117	127	130
	ENSMUSG00000024276.7	Zfp397	0.407082	5.07194	34.1551	4.83875e-06	0.00454522	1073	1055	1039	1534	1580	1247
	ENSMUSG00000040857.15	Erf	-0.322645	6.32476	32.8115	6.46248e-06	0.00596929	3095	3029	3697	2682	2860	2538
	ENSMUSG00000024846.6	Cst6	-0.36643	8.2329	33.9377	7.06281e-06	0.00641685	11257	11686	14466	9577	10626	9592
	ENSMUSG00000000876.11	Pxmp4	0.366638	6.48554	33.5044	7.21137e-06	0.00644615	2822	2841	2928	4203	4154	3154
	ENSMUSG00000063047.9	Zfp780b	0.690684	2.37436	31.8402	8.00169e-06	0.00698872	156.76	127.96	146.52	245.84	254.04	219.38
	ENSMUSG00000076614.7	Ighg1	-2.45719	-1.12155	31.8016	8.07055e-06	0.00698872	21	14	42	6	5	3
	ENSMUSG00000027401.9	Tgm3	-0.457765	8.0849	42.1558	9.38964e-06	0.00765269	10676	10661	13355	8551	8502	8808
	ENSMUSG00000045573.9	Penk	0.443823	4.12844	31.1567	9.32145e-06	0.00765269	528.96	505.99	591.97	863.98	753	668.98
	ENSMUSG00000066361.3	Serpina3c	0.329058	7.31398	31.251	9.12602e-06	0.00765269	5150.12	4860.77	5506	7608	6691.98	5863
	ENSMUSG00000068885.4	Lce3f	-0.961504	1.2771	31.3098	9.00652e-06	0.00765269	114.48	93.52	139.04	58.57	74.84	50.05
	ENSMUSG00000032578.7	Cish	-0.343953	5.82595	30.906	9.86313e-06	0.00791044	2114	2142	2750	1923	2038	1718
	ENSMUSG00000082361.6	Btc	0.574877	4.13215	36.5292	9.99135e-06	0.00791044	545	499	496	760	786	818
	ENSMUSG00000047045.17	Tmem164	0.32755	7.50805	30.5336	1.0732e-05	0.00836138	5622	5910	6206	8449	8104	6533
	ENSMUSG00000093954.8	Gm16867	-0.921457	2.39633	36.9893	1.08627e-05	0.00836138	268.59	202.52	283.25	127.57	181.35	103.09
	ENSMUSG00000026536.9	Ifi211	0.354117	7.60176	31.573	1.21022e-05	0.0091879	6430.35	5683.37	6654.76	9500.58	8207.78	7111.35
	ENSMUSG00000089789.1	Rdh1	-0.311946	5.7	29.7453	1.28573e-05	0.00962922	2073.97	1961.93	2301.63	1853.95	1890.96	1531.73
	ENSMUSG00000066687.5	Zbtb16	-0.291387	7.26494	29.6318	1.31993e-05	0.00975361	6257	5701	6678	5574	5438	4712
	ENSMUSG00000059113.2	Gm10061	-1.00234	1.16938	29.4381	1.38058e-05	0.0100675	92	95	138	65	46	55
	ENSMUSG00000005360.14	Slc1a3	0.389519	4.88429	29.3307	1.4155e-05	0.0101731	947	873	988	1459	1226	1118
	ENSMUSG00000039323.18	Igfbp2	-0.333235	6.52207	29.2659	1.43704e-05	0.0101731	3383	3667	4239	3020	3215	2980
	ENSMUSG00000053228.12	Ceacam3	-1.5401	-0.370246	29.227	1.45012e-05	0.0101731	45	31	43	18	13	11
	ENSMUSG00000037885.18	Stk35	-0.301165	5.95099	29.1503	1.47635e-05	0.0102276	2434	2309	2780	2138	2174	1974
	ENSMUSG00000109198.1	D7Bwg0826e	-0.659705	2.39956	28.812	1.59819e-05	0.010935	245.02	194.44	267.64	165.52	161.84	133.83
	ENSMUSG00000031079.12	Zfp300	2.34432	-1.44982	28.7543	1.62005e-05	0.0109493	3	3	5	23	17	19
	ENSMUSG00000020893.17	Per1	-0.319748	8.30053	28.4592	1.73702e-05	0.0115985	12340	11389	14950	10357	11313	10139
	ENSMUSG00000025986.6	Slc39a10	0.305771	5.73999	28.1305	1.87814e-05	0.0122445	1679	1619	1968	2414	2330	1973
	ENSMUSG00000026604.17	Ptpn14	-0.288427	6.93647	28.1482	1.87025e-05	0.0122445	4891	4536	5409	4167	4529.99	3830
	ENSMUSG00000084033.3	Gm7645	6.26554	-2.44919	29.2761	1.90006e-05	0.0122445	0	0	0	5.62	15.82	7.58
	ENSMUSG00000023186.14	Vwa5a	0.393471	6.06504	32.7944	2.06777e-05	0.0127796	2054	2028	2283	3362	2959	2349
	ENSMUSG00000054580.14	Pla2r1	0.946468	4.75127	69.2167	2.07532e-05	0.0127796	672.35	685.91	654.42	1576.16	1437.67	1031.13
	ENSMUSG00000061144.5	Spink12	-0.440728	4.37436	28.1106	2.00747e-05	0.0127796	747	836	1050	694	735	571
	ENSMUSG00000078349.3	AW011738	0.492226	3.54198	27.7265	2.06893e-05	0.0127796	351	355	351	545	568	431
	ENSMUSG00000042845.7	Wfdc12	-0.560939	6.0558	47.5431	2.12625e-05	0.0129493	2982.93	2617.95	3126.94	1951.96	1991.99	2122.94
	ENSMUSG00000022225.7	Cma1	0.35712	5.46058	27.5915	2.23355e-05	0.013455	1266	1469	1503	2031	1889	1694
	ENSMUSG00000020607.7	Lratd1	0.318065	6.55222	27.0942	2.41099e-05	0.0142148	2929	3073	3169	4174	3855	3772
	ENSMUSG00000095079.6	Igha	-1.14807	2.56841	45.4059	2.41024e-05	0.0142148	224	283	392	123	144	147
	ENSMUSG00000037640.15	Zfp60	0.607062	2.49173	26.9909	2.47248e-05	0.014424	162	157	165.95	253.98	264.97	243.57
	ENSMUSG00000074166.7	AW146154	0.694382	2.06975	26.8686	2.54749e-05	0.0147067	99.49	115.93	132.86	213.18	194.36	174.05
	ENSMUSG00000090222.2	Ifi203-ps	0.925739	2.96211	40.0297	2.62622e-05	0.0148518	217.19	176.86	191.19	485.6	391.33	281.2
	ENSMUSG00000112963.1	Gm6093	-1.59147	2.18132	56.7771	2.59993e-05	0.0148518	264	226.15	253	118	89.66	49.12
	ENSMUSG00000058163.14	Gm5431	0.452536	4.00795	26.5621	2.74653e-05	0.0153753	492.1	445.46	555	831.06	681.23	597.49
	ENSMUSG00000059606.3	Rnase2b	-0.507749	3.69814	26.7682	2.85275e-05	0.0156537	553	527	591	385	386	435
	ENSMUSG00000069792.5	Wfdc17	-0.314078	7.70724	26.4392	2.83106e-05	0.0156537	8213	7821	9505	6844	7165	7068
	ENSMUSG00000039782.15	Cpeb2	-0.282458	6.75454	26.3497	2.89437e-05	0.0157263	4168	3940.99	4967	3767	3934	3368
	ENSMUSG00000009047.4	Gm5965	-1.02437	3.61576	53.5126	3.04395e-05	0.0159837	490.81	557.91	765.22	335.88	269.63	306.17
	ENSMUSG00000030946.13	Lhpp	-0.312784	5.34276	26.2103	2.99604e-05	0.0159837	1569	1502	1886	1437	1470	1208
	ENSMUSG00000031955.10	Bcar1	-0.305722	6.04379	26.1291	3.0571e-05	0.0159837	2534	2398	3120	2321	2247	2121
	ENSMUSG00000040987.15	Mill2	0.408455	4.19231	26.1902	3.01104e-05	0.0159837	554	571	596	865	849	656
	ENSMUSG00000010307.7	Tmem86a	0.447182	4.79097	29.9835	3.19932e-05	0.0164963	808	851	912	1256	1427	959
	ENSMUSG00000011008.13	Mcoln2	0.427717	4.8123	28.8036	3.21467e-05	0.0164963	966	769	895	1358	1183	1113
	ENSMUSG00000018476.7	Kdm6b	-0.316364	6.35736	25.8742	3.25755e-05	0.016563	2987.15	3148.73	3900.29	2723.69	2918.74	2637.33
	ENSMUSG00000056592.14	Zfp658	0.962789	0.977245	25.7633	3.34913e-05	0.0168738	40	56	46	108	92	87
	ENSMUSG00000024066.9	Xdh	0.436213	8.86312	35.5993	3.51044e-05	0.0175272	14759	14183	14485.9	23534	20064	17402
	ENSMUSG00000034947.13	Tmem106a	0.359926	4.89763	25.2148	3.84539e-05	0.0187647	934	938	992	1420	1358	1038
	ENSMUSG00000055546.6	Timd4	0.546956	3.22849	25.2664	3.79549e-05	0.0187647	304	239	290	489	439	334
	ENSMUSG00000086428.1	Gm15199	1.69382	-0.696571	25.2	3.85987e-05	0.0187647	7	12	10	30	27	40
	ENSMUSG00000024481.5	Lvrn	0.421902	4.3991	25.6487	3.96498e-05	0.0191081	637	607	739	1088	916	745
	ENSMUSG00000021670.14	Hmgcr	-0.280567	7.5817	24.8911	4.17527e-05	0.0199481	7651	7078	8419	7186	6951	5577
	ENSMUSG00000026435.15	Slc45a3	0.426011	4.02124	24.758	4.31974e-05	0.0202885	452	502.95	565.83	746.02	789.98	580.04
	ENSMUSG00000067149.6	Jchain	-1.04148	1.13876	26.4389	4.29414e-05	0.0202885	84	83	155	61	56	43
	ENSMUSG00000033713.12	Foxn3	-0.291901	7.23082	24.4426	4.68412e-05	0.021815	6269	5309	6649	5383	5623	4382
	ENSMUSG00000068742.11	Cry2	-0.293802	7.4634	24.3198	4.83485e-05	0.0223293	7102.02	6159.72	8210.3	5945.53	6362.39	5680.66
	ENSMUSG00000074433.4	Lce3e	-1.20206	0.0737278	24.2635	4.90575e-05	0.0224696	46.03	52.85	55.32	26.79	17.59	24.43
	ENSMUSG00000042249.11	Grk3	0.323186	5.11702	24.1075	5.10804e-05	0.0230157	1050	1089	1252	1482	1461	1421
	ENSMUSG00000083939.1	Gm14451	6.05821	-2.60786	25.0463	5.07533e-05	0.0230157	0	0	0	5.6	6.56	12.54
	ENSMUSG00000027075.16	Slc43a1	0.330954	6.12629	25.744	5.16877e-05	0.0231015	2415	2158	2210	3107	2973	2748
	ENSMUSG00000043496.7	Tril	0.462681	3.41858	24.03	5.21204e-05	0.0231085	295.2	311.94	379.3	475.95	521.99	405.35
	ENSMUSG00000026088.15	Mitd1	0.408593	5.07873	27.6482	5.45587e-05	0.0238376	1070.73	1095.7	1009.08	1607.86	1492.42	1278.86
	ENSMUSG00000038518.15	Jarid2	-0.274752	6.20015	23.8498	5.46249e-05	0.0238376	2955	2726	3178	2495	2652	2397
	ENSMUSG00000020707.6	Rnf135	0.497913	3.29394	23.8011	5.53236e-05	0.0239538	291	302	294	495	446	360
	ENSMUSG00000091474.2	2610021A01Rik	0.49518	3.18501	23.665	5.73307e-05	0.0246304	279.46	262.45	282.38	431.44	449.08	325.49
	ENSMUSG00000030469.10	Zfp719	0.708465	1.82731	23.4526	6.06207e-05	0.0258435	103	90	98	185	181	128
	ENSMUSG00000097000.2	Gm17435	0.683815	1.79278	23.4116	6.1279e-05	0.0259248	94.57	93.58	99.06	176.79	165.28	135.89
	ENSMUSG00000000409.14	Lck	0.654742	2.08325	23.3498	6.22864e-05	0.0259415	125	107	125	221	209	153
	ENSMUSG00000031788.14	Kifc3	-0.29736	5.59796	23.3238	6.27158e-05	0.0259415	1827.27	1884.43	2166.02	1651.76	1672.93	1596.19
	ENSMUSG00000073555.1	Gm4951	0.88038	4.43026	51.9963	6.27229e-05	0.0259415	553.05	568	538	1284.21	1079	820
	ENSMUSG00000045795.10	Whamm	0.339542	5.13992	23.2742	6.35427e-05	0.0260859	1106	1122	1188	1651	1634	1205
	ENSMUSG00000020062.7	Slc5a8	-0.549428	2.66061	23.1598	6.54972e-05	0.0266906	265	252	305	181	221	177
	ENSMUSG00000005686.17	Ampd3	0.290017	6.44248	22.9621	6.90303e-05	0.0269423	2929.86	2805.76	2846.09	3797.18	3664.58	3391.26
	ENSMUSG00000039783.15	Kmo	0.933783	1.00129	23.0617	6.72249e-05	0.0269423	53	55	38	106	95	89
	ENSMUSG00000053716.9	Dusp7	-0.286519	6.99017	22.992	6.84828e-05	0.0269423	4827	4742	5842	4184	4572	4220
	ENSMUSG00000059956.14	Serpinb12	-0.6055	7.27983	47.2033	6.68231e-05	0.0269423	6839	6379	7428	4457	4515	4932
	ENSMUSG00000096472.2	Cdkn2d	-0.28643	5.5281	22.9781	6.87362e-05	0.0269423	1816	1676	2097	1635	1599	1480
	ENSMUSG00000108441.1	Gm32846	-1.81439	-1.19065	22.962	6.90316e-05	0.0269423	20.69	16.02	30.14	6	6.6	6.6
	ENSMUSG00000051998.14	Lax1	-0.558917	2.55836	22.8276	7.15503e-05	0.02773	269	214	285	187	188	162
	ENSMUSG00000059423.13	Zfp933	0.559591	2.69992	22.744	7.31687e-05	0.0281603	195	194	182	285	301	284
	ENSMUSG00000043090.18	Zfp866	0.412174	4.12987	22.6601	7.48298e-05	0.028601	545.04	572.55	522.96	806.44	750.27	705
	ENSMUSG00000052397.8	Ezr	-0.300677	8.29497	23.1777	7.552e-05	0.0286671	11917	11732	14616	10354	10878	10618
	ENSMUSG00000049872.8	Calhm5	0.456514	3.22905	22.4699	7.87539e-05	0.0296913	290	264	311	430	450	348
	ENSMUSG00000022871.13	Fetub	-0.464222	3.52989	22.3751	8.07925e-05	0.0299022	462	447	563	359	351	383
	ENSMUSG00000049421.13	Zfp260	0.315967	5.00769	22.3688	8.0932e-05	0.0299022	1077	983	1086	1492	1407	1158
	ENSMUSG00000085894.1	Gm15832	-0.639951	2.37102	22.3792	8.07049e-05	0.0299022	244.62	171.81	274.39	171.52	155.8	128.7
	ENSMUSG00000037126.16	Psd	-0.387494	3.79313	22.1514	8.58361e-05	0.0315041	554.71	542.76	627.28	455.52	501.05	405.06
	ENSMUSG00000067942.6	Zfp160	0.512609	3.73961	24.6763	8.6815e-05	0.0316008	391.58	428.6	380.3	681.76	620.7	481.35
	ENSMUSG00000113450.1	Gm49359	0.55883	2.65557	22.0916	8.72399e-05	0.0316008	192	187.67	173.81	306.89	277.82	260
	ENSMUSG00000115902.1	AC113595.1	0.946935	2.33853	30.846	8.82378e-05	0.0317547	150.39	117.38	105.59	302.67	262.26	186.62
	ENSMUSG00000090231.10	Cfb	0.414364	7.14543	30.7466	9.29376e-05	0.0332303	4518.09	4170.65	4656	7256	6077.7	5108
	ENSMUSG00000042579.2	4632404H12Rik	0.454687	3.53822	21.7465	9.58517e-05	0.0340525	361	368	340	508	513	494
	ENSMUSG00000006445.3	Epha2	-0.336703	5.99437	24.3203	9.77968e-05	0.0343038	2362	2418	3075	2078	2181	2116
	ENSMUSG00000036777.8	Anln	-0.299059	5.28505	21.6745	9.77612e-05	0.0343038	1529	1449	1759	1350	1309	1297
	ENSMUSG00000025153.9	Fasn	0.282674	8.48811	21.6175	9.93015e-05	0.0346125	10644	12072	12923	16111	15643	13105
	ENSMUSG00000092572.7	Serpinb10	-0.349413	4.41849	21.5651	0.000100744	0.0348958	848.33	798.38	990.54	675.76	783.97	670.53
	ENSMUSG00000025955.13	Akr1cl	1.23792	-0.148304	21.4791	0.000103158	0.0355102	16	24	15	48	45	42
	ENSMUSG00000046768.13	Rhoj	0.301108	6.68069	22.3157	0.000106617	0.036474	3338	3096	3689	4933	4468	3518
	ENSMUSG00000003721.14	Insig2	0.271597	6.42917	21.3367	0.000107292	0.0364801	2842	2811	2917	3778	3888	3067
	ENSMUSG00000035299.16	Mid1	0.726572	6.03272	52.2939	0.000107987	0.0364923	1960.64	1725.14	1715.67	3177.19	2973.42	3076.07
	ENSMUSG00000022014.15	Epsti1	0.439386	3.52578	21.284	0.000108868	0.036567	356	330	385	581	520	404
	ENSMUSG00000039934.12	Gsap	0.507549	3.25934	21.3321	0.000111555	0.0370208	294	272	298	518	429	329
	ENSMUSG00000074743.4	Thbd	-0.3423	7.25848	25.1784	0.000111062	0.0370208	5601	5639	7708	5454	5263	4629
GzmA S211A vs 6J feet 6 hours after i.v. injection of 250 ug poly(I:C). BioProject ID: PRJNA666748	ENSMUSG00000057614.6	Gnai1	-0.318519	5.89158	22.5885	0.000112405	0.0370811	2398	2004	2885	2110	2080	1812
	ENSMUSG00000035356.17	Nfkbiz	-0.258971	6.81217	21.0804	0.000115196	0.0377768	4371	3962	5186	4028	4054	3540
	ENSMUSG00000020275.9	Rel	-0.280817	6.56212	20.9823	0.000118388	0.0381109	3963	3395	4052	3588	3416	2720
	ENSMUSG00000032841.15	Prr5l	0.653948	2.09506	20.9999	0.000117809	0.0381109	120	113	127	245	193	150
	ENSMUSG00000054499.9	Dedd2	-0.344778	6.92006	25.0559	0.000118965	0.0381109	4789.95	4429.91	5740.78	4001.93	3957.91	4099.91
	ENSMUSG00000054715.11	Zscan22	0.608008	2.45339	20.9849	0.000118301	0.0381109	138	177	156	249	240	252
	ENSMUSG00000058900.5	Rsl1	0.799632	1.16412	20.939	0.000119826	0.038166	57.83	57.98	59.06	129.08	99.88	86.78
	ENSMUSG00000012350.15	Ehf	-0.297597	5.46466	20.7672	0.000125727	0.0398166	1844	1624	1886	1496	1504	1482
	ENSMUSG00000038949.8	Cnst	-0.269382	5.77002	20.7343	0.000126893	0.0399575	2129	1959	2490	1886	1947	1777
	ENSMUSG00000042507.15	Elmsan1	-0.272905	7.4664	20.6571	0.00012967	0.0406015	6720	6401	8252	5941	6317	5889
	ENSMUSG00000027951.16	Adar	0.416162	7.206	29.6368	0.000134993	0.0420305	4793.67	4533.96	4540.61	7345.8	6459.66	5424.97
	ENSMUSG00000036362.2	P2ry13	0.42923	3.45258	20.4861	0.000136069	0.0421289	334	326	361	530	513	383
	ENSMUSG00000026077.15	Npas2	0.417957	3.77321	20.4052	0.000139214	0.0428631	441	358	488	561	616	587
	ENSMUSG00000016262.14	Sertad4	-0.282963	5.42435	20.3442	0.000141638	0.0433687	1624	1636	1930.11	1432	1541.06	1415
	ENSMUSG00000021182.16	Ccdc88c	-0.279211	5.68775	20.2999	0.000143428	0.0436182	2065.83	1837.98	2325.97	1704.99	1904	1670.98
	ENSMUSG00000022684.15	Bfar	0.408668	4.82304	23.9521	0.000146245	0.0436182	944.6	840.6	879.89	1352.58	1354.26	973.66
	ENSMUSG00000041623.17	D11Wsu47e	0.556401	2.65983	20.278	0.00014432	0.0436182	184	189	183	332	300	219
	ENSMUSG00000042179.6	Pnliprp1	-3.19339	-2.04856	20.739	0.000145066	0.0436182	6	23	9	2	1	1
	ENSMUSG00000055653.13	Gpc3	0.298842	5.59484	20.2279	0.000146388	0.0436182	1534	1454	1787	2237	2216	1629
	ENSMUSG00000078616.2	Trim30c	0.77246	2.45305	24.8401	0.00014823	0.0439306	161	154	122	308	273	199
	ENSMUSG00000033016.16	Nfatc1	-0.295142	6.01615	20.7658	0.000150715	0.0444297	2361	2451	3058	2191	2506	1918
	ENSMUSG00000025887.10	Casp12	0.363782	4.60459	20.6383	0.000152707	0.0447786	783	727	826	1232	1020	862
	ENSMUSG00000030124.2	Lag3	0.483958	3.30543	20.0754	0.000153705	0.0448342	345	264	291	487	455	364
	ENSMUSG00000118332.1	Fam220a	-0.251983	5.75085	19.9963	0.000156367	0.0453717	2133.43	1959.42	2352.55	1922.83	1941.37	1714.96
	ENSMUSG00000040209.12	Zfp704	0.299121	4.85999	19.844	0.000163331	0.0471458	935	915	1009	1318	1301.71	1025
	ENSMUSG00000024691.13	Fam111a	0.369616	3.94737	19.8067	0.000165091	0.0471624	486	495	491	699	698	575
	ENSMUSG00000026135.17	Zfp142	0.398765	3.8697	19.8205	0.000164439	0.0471624	415.07	480.17	484.96	700.7	659.74	526.87
	ENSMUSG00000099009.1	Rdh16f1	-0.255852	5.6397	19.7246	0.00016903	0.0480401	2002.66	1850.67	2113.3	1785.83	1849.05	1530.55
	ENSMUSG00000025981.13	Coq10b	-0.323559	5.02916	19.9175	0.000171641	0.0485333	1331.49	1124.39	1550.9	1149.28	1232.51	921.13
	ENSMUSG00000024524.17	Gnal	-0.427321	3.53777	19.5563	0.000177426	0.0495987	496.63	437.52	527.57	361.35	449.26	314.06
	ENSMUSG00000047977.3	Synb	-5.69239	-2.87082	20.1713	0.000178094	0.0495987	7.46	7.4	3.71	0	0	0
	ENSMUSG00000059839.9	Zfp874b	0.509107	3.06733	19.5545	0.00017752	0.0495987	273.96	257.3	220.48	393.59	384.35	333.63
	ENSMUSG00000005338.13	Cadm3	0.248019	6.74251	19.4764	0.000181573	0.0501014	3451.22	3287.35	4055.87	4833.96	4517.26	3873.44
	ENSMUSG00000062661.6	Ncs1	-0.310372	4.90429	19.4738	0.000181707	0.0501014	1100	1189	1358	995	1041	989
	ENSMUSG00000038894.7	Irs2	-0.277102	5.93313	19.4435	0.00018331	0.0502932	2282.95	2165.99	2952	2211	2216.98	1854
	ENSMUSG00000000148.17	Brat1	0.363333	3.89553	19.2972	0.000191257	0.0516457	438	458	533	618	683	593
	ENSMUSG00000001995.9	Sipa1l2	-0.261459	5.8675	19.3079	0.00019066	0.0516457	2225	2175	2613	1954	2136	1928
	ENSMUSG00000031712.10	Il15	0.379326	4.28676	19.6869	0.000189651	0.0516457	661	595	600	948	861	699
	ENSMUSG00000043415.5	Otud1	-0.270348	5.44469	19.2677	0.000192899	0.0516457	1739	1531	1981	1509	1581	1389
	ENSMUSG00000098814.2	Igkv19-93	-2.58298	-1.85373	19.2713	0.0001927	0.0516457	10	7	26	3	3	1
	ENSMUSG00000056144.14	Trim34a	0.61415	4.99175	35.172	0.000198278	0.0528307	1015.3	855.06	883.2	1696.1	1486.66	1199.05
	ENSMUSG00000022371.16	Col14a1	0.293539	6.17739	20.2751	0.000200607	0.0531955	2297	2352	2494	3381	3259	2454
	ENSMUSG00000066677.12	Ifi208	0.60818	4.14981	28.9322	0.000204617	0.0540004	539.8	485.95	513.57	993.61	822.86	625.04
	ENSMUSG00000032690.16	Oas2	0.437231	5.41083	26.7481	0.000205752	0.0540425	1370	1224	1376	2178	1940	1466
	ENSMUSG00000029007.8	Agtrap	0.260611	5.22321	19.0255	0.00020702	0.0541192	1214	1160	1365	1603	1600	1416
	ENSMUSG00000022587.14	Ly6e	0.263766	8.1558	18.9663	0.000210641	0.0546239	9113	9157	10252	13510	11787	10144
	ENSMUSG00000036617.17	Etl4	0.243056	6.45921	18.9618	0.000210922	0.0546239	3041.99	2689	3135	3860	3749	3232
	ENSMUSG00000001036.17	Epn2	-0.252122	6.40388	18.8745	0.000216391	0.0552654	3131	3210	3803	2863	3178	2731
	ENSMUSG00000056749.7	Nfil3	-0.269916	6.22684	18.8843	0.000215773	0.0552654	2887	2578	3589	2748	2662	2308
	ENSMUSG00000072621.13	Slfn10-ps	0.807594	1.09072	18.8948	0.000215109	0.0552654	50.26	50.98	64.47	122.47	109.15	69.53
	ENSMUSG00000021392.8	Nol8	0.291611	4.93785	18.8036	0.000220947	0.0561703	1018	973	1032	1407	1295	1129
	ENSMUSG00000078786.9	BC024978	-0.275462	4.92598	18.7551	0.000224127	0.0567186	1232.94	1137.04	1287.54	1080.98	1081.97	956.9
	ENSMUSG00000040043.17	Rbms2	0.32962	5.71519	21.223	0.000226851	0.0568882	1786	1517	1819	2557	2282.91	1828
	ENSMUSG00000063894.15	Zkscan8	0.324079	4.44484	18.7294	0.000225833	0.0568882	680	720	718	970	979	800
	ENSMUSG00000021770.11	Samd8	-0.272075	5.44616	18.6142	0.000233641	0.0579752	1792	1521	1943	1604	1592	1297
	ENSMUSG00000050896.12	Rtn4rl2	0.809796	1.19706	18.6088	0.000234017	0.0579752	65	55	58	141	108	76
	ENSMUSG00000062380.4	Tubb3	-0.4618	3.94042	21.1947	0.000234323	0.0579752	558	659	737	445	512	500
	ENSMUSG00000036136.9	Fam110c	-0.396205	3.6082	18.5712	0.000236638	0.0581999	465	460	600	412	390	387
	ENSMUSG00000085088.1	4931413K12Rik	-1.01002	0.248827	18.5613	0.000237332	0.0581999	55	47	66	39	27	20
	ENSMUSG00000037613.16	Tnfrsf23	-0.472694	2.81223	18.5161	0.000240525	0.0587231	275	273.89	346.11	236.02	216.12	210.77
	ENSMUSG00000033170.14	Card10	-0.354429	4.42214	18.5966	0.00024375	0.0592495	818	810	1022	658	746	721
	ENSMUSG00000026600.12	Soat1	0.252628	6.16587	18.423	0.000247268	0.0595819	2344	2282	2581	3334	2975	2572
	ENSMUSG00000030956.15	Fam53b	-0.289195	5.57515	18.5732	0.000246566	0.0595819	1813	1787	2178	1539	1684	1629
	ENSMUSG00000036523.16	Greb1	-0.843179	1.25751	19.0539	0.000256258	0.0612352	77	116.74	138.49	77.68	58.51	54.43
	ENSMUSG00000042622.14	Maff	-0.274101	5.09327	18.3019	0.000256339	0.0612352	1316	1216	1590	1216	1223	1068
	ENSMUSG00000038780.14	Smurf1	-0.250113	6.22343	18.2857	0.000257581	0.0612678	2802	2703	3455	2562	2759	2423
	ENSMUSG00000110185.2	Igip	0.379578	3.53234	18.2067	0.000263723	0.0624607	358	328	418	536	500	444
	ENSMUSG00000059089.4	Fcgr4	0.467839	3.29988	18.3709	0.000267682	0.0631285	321	260	324	521	435	341
	ENSMUSG00000048106.6	4632415L05Rik	0.406313	3.40705	18.1175	0.000270856	0.0636065	340	319	338	504	489	378
	ENSMUSG00000002227.15	Mov10	0.497258	4.31814	23.9287	0.000283623	0.0657929	637	560	616	1068	903	689
	ENSMUSG00000034595.17	Ppp1r18	-0.227819	6.12454	17.9734	0.000282818	0.0657929	2667	2574	3048	2501	2590	2210
	ENSMUSG00000042063.11	Zfp386	0.333944	4.35768	17.9628	0.000283728	0.0657929	666	662	657	958	858	776
	ENSMUSG00000030095.10	Tmem43	-0.298022	7.6114	20.0689	0.000286745	0.0659406	7628	7216	8947	6212	6948	6682
	ENSMUSG00000091649.3	Phf11b	0.75849	3.32504	27.9406	0.000286425	0.0659406	304.35	252.13	255.13	597.47	461.01	370.79
	ENSMUSG00000025076.11	Casp7	0.406365	3.31771	17.8723	0.000291557	0.0666773	320	281	338	472	459	357
	ENSMUSG00000039853.18	Trim14	0.597336	2.3385	18.0514	0.000292355	0.0666773	143.97	148.22	144.29	288.92	226.77	171.78
	ENSMUSG00000060301.6	2610008E11Rik	0.439686	4.26878	21.1515	0.000295512	0.0671213	630	614	541	825	888	797
	ENSMUSG00000053007.9	Creb5	-0.252133	5.53289	17.741	0.000303347	0.0686197	1836	1665	2043	1698	1730	1381
	ENSMUSG00000055172.10	C1ra	0.246324	6.88765	17.721	0.000305188	0.0687555	3871.93	3603	4470	5319.53	5254.83	4075
	ENSMUSG00000044288.6	Cnr1	0.67924	1.50593	17.6896	0.000308108	0.0688535	81	74	80	161	121	108
	ENSMUSG00000079012.11	Serpina3m	0.498906	3.89439	21.7259	0.000307474	0.0688535	471.29	465.01	407.13	759.56	653.73	562.07
	ENSMUSG00000097476.1	Gm26583	-0.893238	0.576388	17.6474	0.000312066	0.069458	74	56	77	36	34	44
	ENSMUSG00000032224.15	Fam81a	-0.316886	4.58422	17.5727	0.000319223	0.0707667	934	925	1066	748	873	795
	ENSMUSG00000021287.12	Xrcc3	-0.308075	5.0218	17.8325	0.000325256	0.0712491	1214	1220	1528	1022	1185	1078
	ENSMUSG00000023947.8	Nfkbie	0.261485	5.24596	17.521	0.000324277	0.0712491	1268	1197	1326	1707	1643	1355
	ENSMUSG00000059173.19	Pde1a	0.471737	3.14799	17.5347	0.000322935	0.0712491	259	286	264	455	406	307
	ENSMUSG00000045294.11	Insig1	0.243111	6.05014	17.4474	0.000331626	0.0723585	2036	2195	2446.01	2801	2954	2412.09
	ENSMUSG00000023353.14	Agap3	-0.243282	6.19985	17.4153	0.000334886	0.0724988	2752	2688	3350	2502	2722	2411
	ENSMUSG00000055148.7	Klf2	0.279701	5.12945	17.4167	0.000334747	0.0724988	1115	1056	1312	1605	1564	1203
	ENSMUSG00000018736.14	Ndel1	-0.237687	7.40787	17.3876	0.00033773	0.0726577	6363	6285	7617	5850	6118	5695
	ENSMUSG00000076613.4	Ighg2b	-2.1083	0.185824	29.5912	0.000338242	0.0726577	62	32	103	13	15	18
	ENSMUSG00000022229.3	Atp12a	-0.909591	1.96777	23.1114	0.000342354	0.0732001	148.85	147	264.91	111	89.98	102.77
	ENSMUSG00000029778.12	Adcyap1r1	0.316021	4.72016	17.333	0.000343408	0.0732001	822	823	935	1253	1200	879
	ENSMUSG00000055235.11	Wdr86	0.812684	0.922182	17.3101	0.000345827	0.0734333	39	44	64	102	99	66
	ENSMUSG00000022667.18	Cd200r1	0.752539	1.06943	17.2532	0.000351898	0.073862	58	40	70	102	101	88
	ENSMUSG00000029178.14	Klf3	-0.24409	8.09167	17.2564	0.000351552	0.073862	10567.4	9609.9	12491	9576.29	9587.08	9140
	ENSMUSG00000032846.10	Zswim6	-0.323591	4.16288	17.2414	0.000353177	0.073862	660	707	822	621	656	529
	ENSMUSG00000053950.10	Adnp2	0.298736	4.64464	17.2552	0.000351686	0.073862	806	824	827	1078	1061	985
	ENSMUSG00000040599.13	Mis12	0.351919	3.86341	17.1948	0.00035826	0.0746356	441.65	481.28	475.63	626.7	659.53	561.37
	ENSMUSG00000041449.16	Serpina3h	0.375335	5.53644	22.0582	0.00035957	0.0746356	1445.09	1567.7	1405.58	2010.94	2057.57	1871.55
	ENSMUSG00000000125.5	Wnt3	-0.455126	3.57746	18.4254	0.000363469	0.0751634	442	497	577	339	396	399
	ENSMUSG00000038456.9	Dennd2a	0.329207	4.07393	17.1283	0.000365651	0.0753337	505	527	607	779	744	606
	ENSMUSG00000045679.14	Pqlc3	-0.243503	5.55243	17.0672	0.00037259	0.076479	1851	1674	2081	1651	1755	1475
	ENSMUSG00000071489.1	Ptgdr	0.830705	0.81278	17.0156	0.000378562	0.0774181	31.76	52	50.66	90	83.31	73.97
	ENSMUSG00000020325.10	Fstl3	0.332087	4.82394	17.9713	0.000386215	0.0778084	878.22	919.17	952.66	1383.99	1247.88	964.48
	ENSMUSG00000029352.14	Crybb3	-0.740074	1.13577	16.9123	0.000390827	0.0778084	104	78	115	63	54	65
	ENSMUSG00000035621.13	Midn	-0.376746	7.31252	23.6664	0.000393107	0.0778084	6219	5717	7935	5050	5381	5220
	ENSMUSG00000046561.9	Arsj	0.434422	3.34805	16.8992	0.000392408	0.0778084	308	323	314	527.82	437	362
	ENSMUSG00000055333.14	Fat2	-0.249752	6.70586	16.8956	0.000392846	0.0778084	3965	3954	4567	3455	3760	3579
	ENSMUSG00000071005.7	Ccl19	0.313605	5.18786	18.0324	0.00039244	0.0778084	1205.9	1128.55	1233.69	1773.22	1595.24	1235.96
	ENSMUSG00000078507.1	Aadacl3	-0.345025	4.28926	16.936	0.000387972	0.0778084	777	798	823	757	678	526
	ENSMUSG00000079227.10	Ccr5	0.490304	2.687	16.9062	0.000391568	0.0778084	183.2	167	236.21	314.69	309.26	226.51
	ENSMUSG00000082029.1	H3f3c	-0.314818	4.24368	16.9267	0.000389089	0.0778084	760.14	706.51	841.56	615.11	678.38	616.46
	ENSMUSG00000087651.3	1500009L16Rik	0.732143	1.13478	16.8707	0.000395889	0.0780803	48	58	71	121	101	82
	ENSMUSG00000075010.5	AW112010	0.489546	6.30899	29.5745	0.00039946	0.0782889	2351	2460	2420	4138	3485	2929
	ENSMUSG00000076612.8	Ighg2c	-2.63618	-1.99672	16.9826	0.000399772	0.0782889	19	10	9	3	0	3
	ENSMUSG00000032020.15	Ubash3b	0.394419	5.45745	22.4969	0.000403385	0.0787184	1414	1430	1308	2038	1848	1770
	ENSMUSG00000048373.8	Fgfbp1	-0.244634	7.46576	16.7375	0.000412577	0.079949	6487	6648	8009	6039	6292	5995
	ENSMUSG00000050756.3	Defb6	-0.254293	5.04926	16.7483	0.0004112	0.079949	1250	1282	1427	1185	1207	1036
	ENSMUSG00000032515.8	Csrnp1	-0.431934	6.32453	26.1742	0.000418619	0.0808373	3009.97	3002.98	4175.95	2482.95	2852.84	2409
	ENSMUSG00000008136.14	Fhl2	-0.305005	4.7692	16.6332	0.000426182	0.0817282	1052	987	1284	873	966	919
	ENSMUSG00000034640.9	Tiparp	-0.239944	7.26859	16.6337	0.000426121	0.0817282	5859.6	5615.43	6944.47	5863.46	5792.48	4469.81
	ENSMUSG00000039634.12	Zfp189	0.797096	0.749696	16.5876	0.00043229	0.0826136	47	43	40	88	85	62
	ENSMUSG00000048280.18	Zfp738	0.401448	3.4012	16.5575	0.000436362	0.0831053	325.54	346.24	320.93	466.51	501.76	393.34
	ENSMUSG00000002325.15	Irf9	0.239959	7.36695	16.5374	0.000439103	0.083137	5565.51	5432	5617	7464.26	6886	5984.21
	ENSMUSG00000074342.3	I830077J02Rik	0.456756	2.65591	16.5343	0.000439529	0.083137	194	182	203	302	290	231
	ENSMUSG00000026450.14	Chit1	-0.293672	7.75981	18.7765	0.000449349	0.0844703	8364	8511	9384	7104	7361	7542
	ENSMUSG00000046719.7	Nxph3	-0.492852	2.46961	16.4617	0.000449626	0.0844703	237	199	273	167	179	171
	ENSMUSG00000021266.16	Wars	0.257765	5.52573	16.4121	0.000456669	0.0852624	1536	1466	1607	2143	1942	1624
	ENSMUSG00000076543.2	Igkv4-74	-3.93402	-2.76104	16.4103	0.000456919	0.0852624	4	9	7	0	1	0
	ENSMUSG00000118537.1	Shld3	-0.490368	2.80357	16.3974	0.000458777	0.0853217	311.87	229.77	354.55	232.9	210.57	210.39
	ENSMUSG00000032021.14	Crtam	-0.564415	1.98613	16.3607	0.000464089	0.0857342	185	163	165	121	117	120
	ENSMUSG00000109857.1	Gm32817	0.751885	0.882308	16.3609	0.000464052	0.0857342	49	50	47	80	100	75
	ENSMUSG00000021565.16	Slc6a19	0.260033	4.81365	16.335	0.000467839	0.0859331	915	894	1002	1193	1232	1052
	ENSMUSG00000091039.2	Krtap20-2	-0.962378	0.413444	16.3321	0.000468267	0.0859331	57	45	86	29	30	39
	ENSMUSG00000030031.14	Kbtbd8	0.722466	0.967235	16.2694	0.000477592	0.0873553	46	49	63	91	88	89
	ENSMUSG00000030604.9	Zfp626	0.583689	3.73834	22.7224	0.000479679	0.0874483	394	428	340	648	667	502
	ENSMUSG00000021725.9	Parp8	0.352933	4.59494	17.6324	0.000485745	0.0882639	797	723	809	1206	1072	811
	ENSMUSG00000004270.13	Lpcat3	0.230734	6.63178	16.1715	0.000492553	0.088778	3297.74	3288.49	3431.71	4351.24	4310.85	3525.07
	ENSMUSG00000039851.11	4932438H23Rik	-1.27702	-0.882157	16.1662	0.00049338	0.088778	25.95	23.45	27.4	12.54	11.91	8.11
	ENSMUSG00000069622.5	Gm10273	-11.9095	2.79604	94.6865	0.000492667	0.088778	688.35	538.07	278.01	0	0	0.03
	ENSMUSG00000032254.10	Kif23	-0.316763	4.27801	16.1403	0.000497426	0.0892164	803	702	861	638	664	650
	ENSMUSG00000021025.8	Nfkbia	-0.210457	7.7808	16.1065	0.000502765	0.089883	8455	8033	9503	8109	8126	6947
	ENSMUSG00000059142.16	Zfp945	0.334692	4.22903	16.0859	0.000506046	0.0901786	630	573	614	911	813	654
	ENSMUSG00000003849.8	Nqo1	0.335899	4.19603	16.0507	0.00051171	0.0908958	529	621	625	839	759	717
	ENSMUSG00000063889.16	Crem	0.425709	3.20499	16.0167	0.000517248	0.0915859	296.9	255.75	308.57	468.82	416.59	313.9
	ENSMUSG00000006611.15	Hfe	0.287219	4.79903	15.9545	0.000527557	0.0927016	956	806	996	1247	1272	964
	ENSMUSG00000029055.17	Plch2	-0.252272	7.2199	16.2844	0.000530239	0.0927016	5773	5479	6611	4897	5320	5174
	ENSMUSG00000031647.10	Mfap3l	-0.237934	6.09124	15.9401	0.00052998	0.0927016	2742	2373	3020	2315	2568	2216
	ENSMUSG00000057835.7	Zfp119a	0.651866	1.55521	15.9647	0.000525846	0.0927016	63.56	93.44	89.21	135.25	148.15	117.18
	ENSMUSG00000025930.6	Msc	0.633379	1.41931	15.9283	0.000531962	0.0927103	80.67	69.49	75.16	123.64	139.32	99.62
	ENSMUSG00000047180.8	Neurl3	0.386189	4.89702	19.7594	0.000536168	0.0931503	1000	899	931	1491	1315	1039
	ENSMUSG00000069208.9	Zfp825	0.463576	2.69593	15.8697	0.000541962	0.0938628	186.83	210.93	194.51	299.93	283.41	262.2
	ENSMUSG00000040740.7	Slc25a34	0.852337	0.513769	15.8409	0.000546954	0.0944322	42	34	31	78	69	54
	ENSMUSG00000078779.4	Zfp59	0.624607	1.88603	15.8241	0.000549889	0.0944378	107	118.15	87.79	159.81	194	148.42
	ENSMUSG00000090523.2	Gypc	0.380732	5.52869	21.0836	0.000550395	0.0944378	1478	1360	1572	2311	2112	1540
	ENSMUSG00000025473.16	Adam8	0.255955	5.33864	15.732	0.000566277	0.0961393	1381	1214	1463	1773	1624	1591
	ENSMUSG00000048852.13	Gm12185	0.551553	2.10869	15.7481	0.000563377	0.0961393	144.68	114.91	119.12	211.18	207.71	157.66
	ENSMUSG00000055994.15	Nod2	-0.239944	5.48578	15.7266	0.00056725	0.0961393	1764	1714	1851	1600	1583	1474
	ENSMUSG00000084038.2	Gm11295	0.713318	1.20051	15.7402	0.000564795	0.0961393	54.12	73.39	58.35	116.53	116.37	84.43
	ENSMUSG00000033781.7	Asb13	0.305262	4.64102	15.6858	0.000574709	0.0971066	842	797	805	1185	1047	901
	ENSMUSG00000028444.17	Cntfr	0.370449	3.35197	15.6527	0.000580822	0.0977944	295	315	366	453	442	405
	ENSMUSG00000042688.16	Mapk6	-0.215144	8.35606	15.6407	0.000583057	0.0977944	12739.3	11929.2	14113.5	11854.8	11644.9	10896.4
	ENSMUSG00000055240.17	Zfp101	0.325144	4.04792	15.6352	0.000584074	0.0977944	519	534	555	725	782	583
	ENSMUSG00000037169.15	Mycn	0.977181	0.0562597	15.6021	0.000590315	0.0983714	16	25	32	51	49	48
	ENSMUSG00000051335.6	Gfod1	-0.262416	6.00805	16.1485	0.0005913	0.0983714	2585	2406	2727	2110	2265	2240
	ENSMUSG00000073490.11	Ifi207	0.218474	7.41492	15.5887	0.000592845	0.0983714	5644.66	5362.96	6371.88	7672.96	7037.35	6165.2
	ENSMUSG00000067297.5	Ifit1bl2	0.664077	1.338	15.4196	0.000625965	0.103557	74.92	65.76	69.29	140.93	103.47	100.14
	ENSMUSG00000023075.9	Akirin1	-0.237433	5.69525	15.3063	0.000649264	0.107092	1983	1812	2394	1832	1892	1672
	ENSMUSG00000022659.13	Gcsam	0.678228	1.17058	15.28	0.000654818	0.107687	67	62	56	116	99	92
	ENSMUSG00000005640.11	Insrr	0.866236	1.34792	17.6558	0.000663211	0.108652	81	54	58	158	125	84
	ENSMUSG00000050092.3	Sprr2b	-0.440206	3.57378	16.6249	0.000666567	0.108652	410	479	621	367	393	380
	ENSMUSG00000095463.8	Entpd4	-0.229178	6.11576	15.2298	0.00066554	0.108652	2698.86	2587.12	2946.73	2315.21	2614.15	2308.42
	ENSMUSG00000024561.11	Mbd1	0.252975	6.19376	15.615	0.00067154	0.108918	2415	2387	2533	3312	3318	2452
	ENSMUSG00000030486.9	Zfp108	1.12858	-0.285878	15.1994	0.000672126	0.108918	22	19.27	11	38.39	47	34
	ENSMUSG00000042350.13	Arel1	0.312236	5.78172	17.8374	0.00067722	0.109105	1828	1686	1879	2676	2431	1847
	ENSMUSG00000058022.14	Adtrp	-0.271658	4.65347	15.1838	0.000675547	0.109105	982	1005	1031	909	912	768
	ENSMUSG00000037007.17	Zfp113	0.431597	3.42381	15.8192	0.000686163	0.110226	310	372	313	512	459	422
	ENSMUSG00000037669.15	Ldah	0.227325	5.79293	15.0654	0.000702028	0.112448	1777	1868	1964	2343	2403	2046
	ENSMUSG00000078899.9	Gm4631	0.394902	3.02918	15.0361	0.000708758	0.113199	236.44	242.6	293.13	379.38	355.15	312.47
	ENSMUSG00000004952.13	Rasa4	0.256531	5.80406	15.2408	0.000712849	0.113525	1866.99	1701	2036.99	2613.96	2456	1868
	ENSMUSG00000062232.14	Rapgef2	-0.271326	4.98603	15.0057	0.000715802	0.113669	1233	1141	1446	1218	1162	892
	ENSMUSG00000105107.1	Gm43412	-0.477237	2.23915	14.9716	0.000723817	0.114522	193	179	228	148	162	134
	ENSMUSG00000112964.1	E430024I08Rik	0.596887	1.62429	14.9653	0.000725306	0.114522	85	88.16	91.27	147.22	163	105.51
	ENSMUSG00000025461.11	Cd163l1	-0.627364	1.34436	14.9343	0.000732675	0.115357	99	100	135	82	70	70
	ENSMUSG00000073910.10	Mob3b	-0.434048	2.83538	14.8904	0.000743266	0.116693	322	245	332	232	242	211
	ENSMUSG00000020108.4	Ddit4	0.218759	7.74074	14.8682	0.000748686	0.117212	7164	7062	7492	9534	8835	7791
	ENSMUSG00000046519.15	Golph3l	0.333387	3.76329	14.7514	0.000777914	0.121203	404.99	434.97	476.99	640	568.99	505.95
	ENSMUSG00000075602.10	Ly6a	0.225287	8.69532	14.7489	0.000778554	0.121203	13311.5	13966.1	14725.4	18739.7	17128.2	14967.4
	ENSMUSG00000006378.15	Gcat	-0.236248	6.3357	14.6981	0.000791674	0.121876	3028.06	3046.72	3545.42	2726.21	2856.94	2805.95
	ENSMUSG00000022456.18	2003-09-01	0.355093	3.47973	14.7108	0.000788364	0.121876	355	319	400	525	456	434
	ENSMUSG00000038058.14	Nod1	0.215149	6.46501	14.7168	0.000786802	0.121876	2981	2882	3120	3893	3757	3148
	ENSMUSG00000058093.13	Zfp729b	0.369443	3.49744	14.7065	0.000789489	0.121876	370.46	364.17	340.18	483.59	513.7	441.85
	ENSMUSG00000022408.7	Fam83f	-0.290581	4.67976	14.6859	0.000794861	0.122028	961.75	1003.26	1134.7	846.86	868.82	887.69
	ENSMUSG00000023070.6	Rgn	-0.43409	3.08234	14.6697	0.000799105	0.12234	337	350	378	237	285	288
	ENSMUSG00000038524.13	Fchsd1	-0.279117	4.78191	14.6317	0.000809169	0.12354	1039.84	1035.8	1244.24	918.06	940.71	949.16
	ENSMUSG00000041328.16	Pcf11	-0.209178	6.9336	14.6201	0.000812251	0.12367	4927.99	4348.99	5153.99	4513.99	4454.93	3912.97
	ENSMUSG00000048078.16	Tenm4	-0.216568	6.45951	14.6116	0.000814532	0.123677	3439	3351	3602	3365	3143	2747
	ENSMUSG00000019850.11	Tnfaip3	-0.210823	7.27056	14.5634	0.000827588	0.124973	5749	5804	6691	5697	5927	4679
	ENSMUSG00000021786.13	Oxsm	0.354415	3.52537	14.5552	0.00082983	0.124973	330	372	405	502	486	470
	ENSMUSG00000036986.16	Pml	0.519623	6.70212	28.0819	0.000825903	0.124973	3282	2955.09	3156	5468	4859	3684
	ENSMUSG00000034209.4	Rasl10a	-0.537862	1.84704	14.5459	0.000832403	0.125021	143	151	169	112	105	111
	ENSMUSG00000041781.9	Cpsf2	0.237121	5.64027	14.5342	0.000835616	0.125164	1740.14	1579.14	1706.13	2229	2072.47	1828.34
	ENSMUSG00000026414.13	Tnnt2	-0.35536	4.32976	15.7435	0.000842279	0.125822	938	676	867	679	708	613
	ENSMUSG00000020785.17	Camkk1	-0.381824	5.60302	19.9118	0.00087098	0.128123	1945	1973	2123	1474	1617	1672
	ENSMUSG00000049649.8	Gpr3	-0.927998	-0.118324	14.405	0.000872143	0.128123	36	41	49	23	23	22
	ENSMUSG00000078942.10	Naip6	0.561859	1.72748	14.3991	0.000873863	0.128123	98.47	97.67	92.11	151.36	167.28	123.35
	ENSMUSG00000087431.1	Gm16054	3.59396	-2.63114	14.4159	0.000868998	0.128123	0	0	1.48	13.79	4.09	4.8
	ENSMUSG00000096696.1	Zfp960	0.417029	2.82354	14.4342	0.000863752	0.128123	210.24	224.76	225.63	297.88	330.67	283.45
	ENSMUSG00000107017.1	Gm43196	0.764763	1.38511	15.5999	0.000862908	0.128123	69	74	64	155	135	78
	ENSMUSG00000116895.1	Gm3435	-0.953123	-0.181319	14.4185	0.000868236	0.128123	36.53	35.62	48.93	23.55	23.73	17.03
	ENSMUSG00000001123.15	Lgals9	0.378514	6.86166	21.0084	0.000884035	0.129272	3731	3568	3807	5899	5068	4036
	ENSMUSG00000027122.15	Arl14ep	0.287059	4.44674	14.3356	0.000892487	0.130156	720	697	736	1001	970	755
	ENSMUSG00000070002.7	Ell	-0.217909	5.76526	14.3278	0.00089478	0.130156	2096	2014	2325	1959	1927	1813
	ENSMUSG00000047678.1	Gpr82	1.20862	-0.853995	14.296	0.000904321	0.1312	9	9	15	29	27	23
	ENSMUSG00000020932.14	Gfap	0.912489	0.167645	14.2654	0.000913574	0.132196	28	27	26	69	54	36
	ENSMUSG00000028386.1	Slc46a2	0.34538	4.92522	16.8186	0.000920933	0.132914	935	933	1074	1176	1312	1346
	ENSMUSG00000035640.18	Cbarp	-0.317235	4.84566	15.5408	0.0009252	0.133183	1129.22	1050.82	1334.95	879.86	1024.32	987.67
	ENSMUSG00000031220.14	Awat2	0.998275	4.9987	43.2832	0.000927907	0.133227	751	880	694	1764	1746	1339
	ENSMUSG00000078787.9	Cyp2t4	-1.46897	-1.19033	14.1651	0.000944666	0.135111	23	14	26	6	6	11
	ENSMUSG00000112627.1	4933412E12Rik	0.741631	2.23888	18.03	0.000945908	0.135111	159	113	110	269	229	168
	ENSMUSG00000025804.5	Ccr1	0.30225	4.52113	14.1961	0.000952382	0.135435	784	687	786	1125	954	804
	ENSMUSG00000028716.15	Pdzk1ip1	-0.223249	5.89342	14.1386	0.000953065	0.135435	2313	2207	2523	2104	2075	2030
	ENSMUSG00000094777.2	Hist1h2ap	-2.27252	-1.91634	14.3264	0.000962764	0.136464	8.85	16.72	13.59	0	4.62	3.45
	ENSMUSG00000039699.14	Batf2	0.665319	2.52957	17.5009	0.000974966	0.13749	165	148	173	340	286	177
	ENSMUSG00000052572.19	Dlg2	-0.296361	5.33991	15.5806	0.000973499	0.13749	1705	1451	1756	1318	1380	1408
	ENSMUSG00000040195.11	Nemp1	0.362081	4.15312	15.1499	0.000979566	0.137788	581	593	525	844	760.43	665
	ENSMUSG00000082676.1	Gm11843	2.83978	-2.22117	14.4491	0.000999758	0.140272	0	4	0	11	10	11
	ENSMUSG00000024349.10	Tmem173	0.355439	5.51899	18.1944	0.0010104	0.141407	1603	1346	1465	2231	2019	1614
	ENSMUSG00000045322.10	Tlr9	0.589066	1.48746	13.9552	0.00101349	0.141483	81	77	83	150	125	101
	ENSMUSG00000009772.15	Nuak2	-0.254523	5.79701	14.4065	0.00102964	0.143376	2037	2164	2456	1824	1994	1917
	ENSMUSG00000029033.16	Acap3	-0.219971	6.02496	13.8511	0.00104966	0.145433	2493	2382	2842	2247	2329	2234
	ENSMUSG00000040389.15	Wdr47	-0.288896	4.59072	13.8532	0.0010489	0.145433	929	891	1097	793	813	842
	ENSMUSG00000020038.10	Cry1	-0.268771	4.60831	13.8151	0.00106247	0.145956	897	998	1029	887	865	758
	ENSMUSG00000039936.18	Pik3cd	0.2749	4.55667	13.8206	0.00106051	0.145956	799	726	812	1085	1032	814
	ENSMUSG00000047030.15	Spata2	-0.216938	5.71694	13.8109	0.00106397	0.145956	2028	1879	2323.96	1855.95	1914	1744.95
	ENSMUSG00000109926.1	Gm45808	5.18398	-3.13436	14.1625	0.00105882	0.145956	0	0	0	6.02	4.23	3.25
	ENSMUSG00000017713.9	Tha1	0.468245	2.11957	13.7969	0.00106905	0.146291	133	122.98	139.98	195.99	199.97	170
	ENSMUSG00000096775.1	Gm5796	0.974022	-0.00391958	13.769	0.00107917	0.147312	27.49	17.96	24.19	65.49	41.12	35.44
	ENSMUSG00000043140.10	Tmem186	0.299463	4.11587	13.7442	0.00108826	0.148188	550	577	574	730	743	690
	ENSMUSG00000037253.8	Mex3c	-0.21001	6.07656	13.7122	0.00110008	0.149158	2648	2338	2998	2438	2480	2186
	ENSMUSG00000040102.10	Klhl42	0.364355	3.34915	13.7104	0.00110077	0.149158	319	325	329	477	471	353
	ENSMUSG00000029563.16	Foxp2	-0.410377	3.08661	13.6224	0.00113413	0.151823	332	289	447	276	306	243
	ENSMUSG00000036078.16	Sigmar1	0.228556	5.58405	13.6228	0.00113397	0.151823	1545.58	1605.6	1699.25	2082.17	1939.7	1844.57
	ENSMUSG00000048232.12	Fbxo10	0.280409	4.86915	13.8616	0.00112549	0.151823	991	944	956	1262	1165	1196
	ENSMUSG00000087194.9	Skint6	-0.429987	2.79044	13.6323	0.00113031	0.151823	294	261	314	208.28	219	234.59
	ENSMUSG00000117303.1	Gm49889	-0.803713	0.234051	13.6261	0.0011327	0.151823	52	46	60	29	34	30
	ENSMUSG00000039770.6	Ypel5	-0.196822	6.58058	13.5906	0.00114641	0.152363	3691	3424	4149	3503	3570	3061
	ENSMUSG00000049404.7	Rarres1	-0.22229	5.76801	13.594	0.0011451	0.152363	2056	2116	2275	1863	2037	1803
	ENSMUSG00000078143.3	Gm17344	-0.625858	1.5126	13.5981	0.00114351	0.152363	100.1	130.47	144.61	102.27	71.8	76.41
	ENSMUSG00000031627.9	Irf2	0.599924	5.24463	27.0043	0.00115589	0.153254	1142	1062	1100	2062	1831	1324
	ENSMUSG00000020123.6	Avpr1a	0.406505	2.83985	13.5387	0.00116685	0.153895	211	202	261	349	313	260
	ENSMUSG00000068071.2	Gm6358	-0.992891	1.01336	16.7719	0.00116905	0.153895	86	72	133	65	34	50
	ENSMUSG00000074890.4	Lcmt2	0.356881	3.41068	13.5336	0.00116888	0.153895	323.12	349.84	345.58	429.91	492.76	425.75
	ENSMUSG00000027188.8	Pamr1	0.330363	5.05244	15.9516	0.00118184	0.154843	1053	929	1262	1581	1529	1107
	ENSMUSG00000084896.1	Gm11632	2.15237	-1.91528	13.502	0.00118152	0.154843	5.05	0	3.24	13.04	11.07	14.95
	ENSMUSG00000024479.3	Mal2	-0.21963	6.36968	13.4634	0.00119717	0.156114	3242	2969	3590	2803	2997	2849
	ENSMUSG00000106415.1	Gm42893	1.09557	-0.392809	13.4698	0.00119456	0.156114	15.2	10.1	24.22	45.35	38.05	26.07
	ENSMUSG00000038754.5	Elovl3	-0.427827	5.73899	21.0767	0.0012107	0.157507	2302	2122	2305	2003	1872	1330
	ENSMUSG00000021647.7	Cartpt	2.52983	1.14215	35.2852	0.00123366	0.159681	12	39	18	112	148	153
	ENSMUSG00000036995.7	Asap3	0.294472	6.03023	15.944	0.00123893	0.159681	2305	1910	2240	3088	2883	2239
	ENSMUSG00000060671.12	Atp8b2	-0.212974	6.16149	13.3691	0.00123638	0.159681	2666	2611	3196	2684	2743	2127
	ENSMUSG00000063234.5	Gpr84	-0.976316	0.115482	13.5163	0.00123715	0.159681	64	46	40.6	18.43	34.04	26.66
	ENSMUSG00000028655.11	Mfsd2a	-0.390809	6.70109	20.3611	0.00124504	0.160096	3998	3742	5331	3275	3565	3354
	ENSMUSG00000038351.14	Sgsm2	-0.242193	5.48734	13.3054	0.00126368	0.161409	1718	1660	1974	1509	1564	1572
	ENSMUSG00000047409.13	Ctdspl	-0.223847	5.77829	13.3047	0.00126399	0.161409	2138	2001	2370	1839	2025	1869
	ENSMUSG00000050079.10	Rspry1	0.284812	4.07985	13.3049	0.0012639	0.161409	564	535	571	753	732	621
	ENSMUSG00000037348.15	Paqr7	1.22075	7.58039	53.1231	0.0012786	0.1629	3560	4922	4080	10307	10770	9340
	ENSMUSG00000037295.7	Ldlrap1	-0.195972	6.4469	13.2613	0.00128292	0.163075	3242	3243	3773	3208	3199	2827
	ENSMUSG00000032497.18	Lrrfip2	-0.204211	6.38619	13.2384	0.00129306	0.163614	3355	3014	3482	3039	2998	2778
	ENSMUSG00000104801.1	Gm43834	1.05583	-0.476854	13.2402	0.00129226	0.163614	14	19	14	40	36	26
	ENSMUSG00000037997.12	Parp11	0.579673	4.22908	21.4111	0.00130273	0.164462	590	526	528	1025	889	647
	ENSMUSG00000029120.10	Ppp2r2c	-0.43105	2.64156	13.2092	0.00130611	0.164513	220	270	293	216	209	175
	ENSMUSG00000015653.13	Steap2	0.338007	3.5693	13.1588	0.00132894	0.165509	370	371	407	582	501	420
	ENSMUSG00000033987.16	Dnah17	-0.324916	3.65421	13.1724	0.00132277	0.165509	533	465	537.02	402	463.01	399.01
	ENSMUSG00000040197.4	Cd209e	0.466326	2.69813	13.2547	0.00132728	0.165509	153	195	249	287	283	276
	ENSMUSG00000066880.15	Zfp617	0.282378	4.59881	13.1743	0.00132188	0.165509	847	784.69	759.82	1068.74	1033.86	912.84
	ENSMUSG00000091549.1	Gm6548	0.321626	5.20452	15.6078	0.00132748	0.165509	1279.67	1108.92	1207.56	1815.14	1524.39	1320.15
	ENSMUSG00000021612.15	Slc6a18	1.17723	-0.79751	13.1409	0.00133717	0.165821	11	8	16	35	25	22
	ENSMUSG00000032454.9	Rbp2	-0.493091	2.46752	13.2312	0.00134043	0.165821	246	212	248	151	168	195
	ENSMUSG00000033147.16	Slc22a15	0.21118	5.40982	13.1367	0.0013391	0.165821	1400	1370	1563	1786	1836	1558
	ENSMUSG00000100826.6	Snhg14	-0.460301	3.02627	13.934	0.00134351	0.165832	338.93	262.88	438.21	294.49	266.93	215.19
	ENSMUSG00000040435.12	Ppp1r15a	-0.502172	6.44161	24.7813	0.00134867	0.166099	3194	3506	4566	2569	2932	2649
	ENSMUSG00000029050.15	Ski	-0.207362	7.56802	13.0995	0.00135639	0.166103	6959	6810	8690	6707	7241	6070
	ENSMUSG00000050503.9	Fbxl22	-0.558579	1.41587	13.0968	0.00135769	0.166103	111.49	100.34	132.42	87.78	83.21	69.83
	ENSMUSG00000068606.6	Gm4841	0.405418	3.97787	15.2436	0.00135203	0.166103	558.99	453	470	787.5	681	570
	ENSMUSG00000034902.17	Pip5k1c	-0.210462	6.27838	13.0412	0.00138401	0.16895	2823	2810	3558	2742	2940	2492
	ENSMUSG00000071660.10	Ttc9c	0.223312	5.32982	13.034	0.00138746	0.168998	1395	1239	1446	1774	1661	1483
	ENSMUSG00000045475.5	Lce3c	-0.406366	3.10309	12.9617	0.00142261	0.1729	324.2	346.45	402.94	253.02	277.8	299.4
	ENSMUSG00000044147.8	Arf6	-0.201354	6.71387	12.9519	0.00142744	0.173108	3831.91	3887.83	4657.89	3733.9	3866.79	3477.93
	ENSMUSG00000039917.10	Rhbdd2	0.252894	4.62989	12.9373	0.00143468	0.173606	777	831	870	1040	1057	952.5
	ENSMUSG00000005699.16	Pard6a	0.520941	1.7125	12.8902	0.00145835	0.176085	86	98	107	156	153	123
	ENSMUSG00000093894.1	Ighv1-53	-3.07412	-2.76068	12.8835	0.00146175	0.176112	7	7	5	1	0	1
	ENSMUSG00000098188.1	Sowahc	-0.204859	6.64897	12.8014	0.00150407	0.180817	4010	3436	4407	3729	3612	3246
	ENSMUSG00000030047.14	Arhgap25	0.297769	4.01476	12.7827	0.00151391	0.181607	507	524	558	691	655	666
	ENSMUSG00000057346.12	Apol9a	0.488535	4.19103	17.9702	0.00151909	0.181834	594.79	544.78	521.05	931.81	878.15	620.26
	ENSMUSG00000000416.16	Cttnbp2	-0.30706	3.6986	12.7605	0.00152568	0.18223	512.81	462.88	603.67	439.89	459.84	412.82
	ENSMUSG00000098905.2	Zfp953	0.699011	0.99691	12.7394	0.00153692	0.183178	50.97	55.09	56	115.46	98.8	60
	ENSMUSG00000001098.15	Kctd10	-0.19377	6.23047	12.7082	0.00155379	0.18325	2880.71	2682.5	3265	2698.93	2852.13	2407.21
	ENSMUSG00000015605.6	Srf	-0.250543	4.52602	12.7098	0.00155292	0.18325	878	824	1056	823	842	722
	ENSMUSG00000031494.7	Cd209a	0.468655	4.17661	17.2874	0.00154532	0.18325	480	499	695	831	728	808
	ENSMUSG00000041633.14	Kctd12b	0.491524	2.21997	12.7016	0.00155736	0.18325	148	123	150	254	195	164
	ENSMUSG00000047423.10	AI837181	0.216831	5.14925	12.7171	0.00154897	0.18325	1182	1098	1333	1526	1506	1299
	ENSMUSG00000072258.10	Taf1a	0.338651	3.8909	12.9134	0.00155569	0.18325	422	507	505	611	626	631
	ENSMUSG00000020676.2	Ccl11	-0.219884	6.45629	12.6886	0.00156443	0.183652	3441	2989	4005	3371	3258	2613
	ENSMUSG00000037872.5	Ackr1	0.221136	5.50249	12.6832	0.00156741	0.183652	1549.78	1433.65	1617.13	2052.04	1915.74	1584.56
	ENSMUSG00000044340.7	Phlpp1	-0.236899	4.91015	12.6771	0.00157074	0.183654	1113	1084	1390	1094	1118	924
	ENSMUSG00000024215.14	Spdef	-1.05667	-0.370898	12.6614	0.00157941	0.184279	43	22	43	14	20	19
	ENSMUSG00000033419.16	Snap91	0.316213	3.76149	12.64	0.00159125	0.185271	458	409	456	619	627	463
	ENSMUSG00000022686.14	B3gnt5	0.484343	2.39211	12.5704	0.00163059	0.189202	176	118	184	265	237	188
	ENSMUSG00000095134.2	Mid1-ps1	-1.65559	1.7098	27.7411	0.00163185	0.189202	160.13	154.5	227.96	55.38	37.15	81.89
	ENSMUSG00000022744.12	Cldnd1	-0.196088	6.16858	12.5466	0.00164426	0.190243	2734	2536	3202	2670	2631	2314
	ENSMUSG00000041986.16	Elmod1	-0.343487	4.61968	14.5818	0.0016518	0.190718	1008	935	1078	752	817	873
	ENSMUSG00000002799.6	Jag2	-0.289743	6.61611	15.2129	0.00169745	0.195424	3607	3635	4677	3180	3448	3356
	ENSMUSG00000095362.7	Gm14325	0.469195	2.25444	12.4524	0.00169961	0.195424	145.53	151.7	136.3	235.7	196.66	189.65
	ENSMUSG00000043085.14	Tmem82	0.848571	0.0560125	12.4159	0.00172158	0.19632	32	21	24	53	52	39
	ENSMUSG00000053117.11	E330013P04Rik	0.796566	0.414038	12.4296	0.0017133	0.19632	38	38	26	67	58	59
	ENSMUSG00000055809.7	Dnaaf3	0.502126	1.83601	12.426	0.00171551	0.19632	94	97	130	172.89	158.43	137
	ENSMUSG00000056973.6	Ces1d	0.23288	4.71766	12.4205	0.00171882	0.19632	885	836	935	1136	1116	973
	ENSMUSG00000093677.1	Gm20712	-0.491737	2.18893	12.4094	0.00172558	0.196372	200	153	230	135	139	150
	ENSMUSG00000031548.7	Sfrp1	0.19314	6.00715	12.355	0.001759	0.198853	2109	2074	2424	2751	2657	2381
	ENSMUSG00000038290.15	Smg6	-0.204274	5.85808	12.3541	0.00175958	0.198853	2152	2171	2513	2016	2160	1935
	ENSMUSG00000056978.8	Hamp2	2.02819	2.13411	35.3099	0.00176439	0.198853	75.94	71	37.95	303.97	312	177.97
	ENSMUSG00000063488.6	Zkscan7	0.338463	3.2865	12.3449	0.00176531	0.198853	312	304.92	325	398.88	432.9	396.88
	ENSMUSG00000107479.1	2610300M13Rik	2.99382	-2.76205	12.3631	0.00175398	0.198853	1	0	1	6	6	7
	ENSMUSG00000046027.17	Stard5	0.195453	6.13616	12.3078	0.00178859	0.201066	2363.07	2286.86	2560.15	3101.19	2887.95	2543.78
	ENSMUSG00000003429.11	Rps11	0.212625	8.82981	12.267	0.00181461	0.202757	13669.4	14897.9	17954.8	18880.9	19239.2	17322.8
	ENSMUSG00000019338.13	Zfp687	0.236973	4.84023	12.2779	0.00180765	0.202757	897.03	950.7	1040.38	1222	1175.87	1111.35
	ENSMUSG00000021411.16	Pxdc1	-0.224929	4.87182	12.2693	0.00181312	0.202757	1091	1109	1270	1083	1063	919
	ENSMUSG00000025340.14	Rabgef1	-0.197018	6.52536	12.2405	0.00183175	0.204055	3657	3333	3834	3250	3378	3102
	ENSMUSG00000060397.6	Zfp128	0.782879	0.214424	12.2376	0.00183359	0.204055	34	27	28	55	60	44
	ENSMUSG00000034173.13	Zbed5	0.543334	1.68421	12.2159	0.00184776	0.20522	90.49	106.07	84.72	144.33	154.75	126.81
	ENSMUSG00000054893.15	Zfp667	0.562642	1.58695	12.21	0.00185166	0.205242	96	70	96	139	160	102
	ENSMUSG00000031861.16	Lpar2	-0.271073	4.07588	12.1933	0.00186267	0.20605	626	644	757	595	593	542
	ENSMUSG00000040714.14	Klc3	-0.244999	6.40793	13.1975	0.00188326	0.207912	3088.95	3190.98	3877.28	2795.89	3054.18	2941.5
	ENSMUSG00000022120.4	Rnf219	0.330893	3.58013	12.1466	0.00189381	0.208456	353	406	399	511	500	492
	ENSMUSG00000030103.11	Bhlhe40	-0.236839	8.60975	12.9707	0.0019028	0.208456	14570	13662	18517	13257	14120	13252
	ENSMUSG00000034800.15	Zfp661	0.400904	2.56578	12.138	0.00189966	0.208456	186	174	196	284	262	214
	ENSMUSG00000050973.11	Gdpgp1	0.567833	1.47678	12.1316	0.001904	0.208456	80	86	75	129	114	126
	ENSMUSG00000061186.15	Sfmbt2	0.869117	1.4671	15.42	0.00190883	0.208456	73	78	58	178	134	88
	ENSMUSG00000063382.6	Bcl9l	-0.235437	7.14053	12.9265	0.00191075	0.208456	5051.95	5286.8	6499.92	4756.48	5062.85	4851.02
	ENSMUSG00000017144.8	Rnd3	-0.200875	6.74965	12.1134	0.00191637	0.208658	4040	3829	4830	4030	4146	3232
	ENSMUSG00000010660.3	Plcd1	-0.210246	6.27741	12.1017	0.00192437	0.208709	2947	2913	3294	2577	2930	2641
	ENSMUSG00000034832.15	Tet3	-0.18925	7.45379	12.1041	0.00192273	0.208709	6771	6318	7486	6161	6591	5837
	ENSMUSG00000038260.10	Trpm4	-0.211057	5.51326	12.0777	0.00194087	0.209679	1679	1707	2010	1595	1679	1524
	ENSMUSG00000064043.13	Trerf1	-0.293117	4.29141	12.0971	0.00193936	0.209679	733	679	969	651	691	648
	ENSMUSG00000058748.9	Zfp958	0.396233	2.67505	12.0704	0.00194593	0.209816	200	201	199	301	284	234
	ENSMUSG00000031832.15	Taf1c	0.285932	4.07521	12.0537	0.00195753	0.209842	501.39	537.38	630.27	673.51	744.53	675.3
	ENSMUSG00000038085.13	Cnbd2	0.466323	2.22005	12.0569	0.00195532	0.209842	127.08	141.66	156.38	218.23	237.12	154.36
	ENSMUSG00000046862.14	Pramef8	0.294352	3.89866	12.0597	0.00195338	0.209842	447	504	516	648	628	582
	ENSMUSG00000028943.18	Espn	0.551634	1.41163	12.0374	0.00196897	0.21066	76	75	81	124	137	92
	ENSMUSG00000019942.13	Cdk1	-0.241712	4.79796	12.0025	0.00199365	0.210966	1041	1095	1173	968	976	940
	ENSMUSG00000025722.16	Wdr73	0.278139	4.03606	12.0207	0.00198077	0.210966	509	526	592	663	713	656
	ENSMUSG00000026712.3	Mrc1	0.234289	7.18011	12.7979	0.00199637	0.210966	4562	4372	5795	6727	6035	5092
	ENSMUSG00000032238.17	Rora	-0.202547	8.37638	12.0028	0.00199341	0.210966	13357	11203	14694	11885	12555	10677
	ENSMUSG00000063160.12	Numbl	-0.240139	5.51355	12.2451	0.00199014	0.210966	1562	1782	2109	1597	1713	1446
	ENSMUSG00000106698.1	Gm43599	-2.99165	-2.80551	12.0237	0.00197862	0.210966	7	5	6	1	0	1
	ENSMUSG00000115345.1	Gm33497	-1.34209	-1.22044	11.9913	0.00200167	0.210966	13	20	27	6	8	10
	ENSMUSG00000117234.1	Gm7818	0.721601	0.715003	11.9904	0.00200227	0.210966	46.68	31.62	54	67.22	74	82
	ENSMUSG00000026656.15	Fcgr2b	0.209928	6.80633	11.985	0.00200616	0.210974	3499.5	3495.06	4466.33	4882.88	4482.87	4252.77
	ENSMUSG00000079419.4	Ms4a6c	0.29407	4.54919	12.5149	0.0020194	0.211964	742.69	747.43	818.15	1168.04	928.39	833.48
	ENSMUSG00000067995.4	Gtf2f2	-0.218518	5.01844	11.8993	0.00206867	0.216317	1239	1200	1395	1127	1188	1079
	ENSMUSG00000091472.2	Gm3739	1.65403	-1.75475	11.9008	0.00206757	0.216317	3.31	4.55	4.68	17.59	16.88	7.41
	ENSMUSG00000011427.16	Zfp790	0.417716	2.60747	11.8828	0.00208092	0.21678	171	208	188	283	266	236
	ENSMUSG00000108777.1	Gm45081	-0.847817	0.0228293	11.8863	0.00207836	0.21678	51	37	49	28	21	29
	ENSMUSG00000015652.9	Steap1	0.52942	1.63204	11.87	0.00209054	0.216956	92	96	85	155	135	119
	ENSMUSG00000025647.16	Shisa5	0.195673	7.67868	11.8649	0.00209436	0.216956	6873	6666	7474	9249	8495	7165
	ENSMUSG00000028480.14	Glipr2	0.279791	4.39788	11.8748	0.00208692	0.216956	717	610	767	997	930	705
	ENSMUSG00000079057.4	Cyp4v3	0.301827	4.0258	11.8009	0.00214308	0.221589	559	490	550	756	752	539
	ENSMUSG00000024019.18	Cmtr1	0.221596	6.52739	12.0807	0.00215379	0.221868	3221.29	2938.91	3194.63	4226.23	3981	3116.93
	ENSMUSG00000032333.6	Stoml1	0.268154	4.44349	11.7877	0.00215329	0.221868	701	714	749	1006	968	732
	ENSMUSG00000044676.10	Zfp612	0.492636	1.87646	11.7564	0.00217766	0.223911	126	96	108	171	172	138
	ENSMUSG00000004446.12	Bid	0.315891	3.51428	11.7377	0.00219237	0.22459	347.84	365.47	401.37	542.33	482.3	411
	ENSMUSG00000057143.15	Trim12c	0.729484	4.22636	23.4736	0.00218864	0.22459	557.14	514.26	465.14	1072.86	894.32	691.16
	ENSMUSG00000027219.13	Slc28a2	0.335826	3.61272	11.7082	0.00221584	0.226576	424.63	375	381.8	595.83	499	451
	ENSMUSG00000036840.5	Siah1a	-0.204977	5.83814	11.7012	0.00222145	0.226731	2189.64	2035.92	2526.77	1995.64	2068.06	1954.83
	ENSMUSG00000062563.15	Cys1	-0.356488	2.92257	11.6943	0.00222692	0.226871	289	298	345	258	276	218
	ENSMUSG00000041836.10	Ptpre	-0.258959	4.37178	11.6871	0.00223273	0.227046	762	758	965	728	791	622
	ENSMUSG00000089773.7	Skint1	-0.360899	3.17388	11.6754	0.00224224	0.227572	377	342	392	275	304	310
	ENSMUSG00000110397.1	Gm45540	1.0417	-0.668786	11.6706	0.00224611	0.227572	13	14	14	38	29	21
	ENSMUSG00000047420.8	Fam180a	-0.362903	3.34605	11.6446	0.00226732	0.229302	417	410	424	347	407	258
	ENSMUSG00000005370.4	Msh6	-0.216628	5.39462	11.6188	0.00228854	0.231026	1557	1605	1811	1464	1500	1440
	ENSMUSG00000068417.8	Pnp2	0.456207	2.36978	11.6026	0.00230199	0.23112	162.75	146.59	164.39	269.01	242.88	163.97
	ENSMUSG00000076549.2	Igkv4-68	-3.51785	-2.99886	11.6124	0.00229382	0.23112	4	4	7	0	1	0
	ENSMUSG00000109032.1	Gm7972	-0.462543	2.04402	11.6028	0.00230186	0.23112	167	146	209	123	144	122
	ENSMUSG00000043290.6	Zfp784	0.484342	1.79882	11.5615	0.00233649	0.233737	92.9	107.21	113.73	167.66	152.85	133.46
	ENSMUSG00000060878.4	Olfr1420	1.90499	-1.97308	11.5658	0.00233285	0.233737	2	6	1	12	12	12
	ENSMUSG00000036306.13	Lzts1	-0.415255	2.46558	11.5492	0.00234695	0.234361	199	217	275	180	179	173
	ENSMUSG00000028540.6	Dph2	0.365177	3.58844	12.0834	0.00236245	0.235456	339	429	379	553	499	478
	ENSMUSG00000031779.3	Ccl22	-0.406323	2.8808	11.5265	0.00236641	0.235456	269	296	355	229	296	193
	ENSMUSG00000111888.1	Gm46212	0.782114	0.248686	11.5169	0.00237464	0.235851	23.37	36.72	31.3	52.18	56.17	54.14
	ENSMUSG00000079523.8	Tmsb10	0.224963	5.77518	11.6454	0.00238256	0.236214	1783.97	1747	2026.59	2556.27	2361.92	1813.86
	ENSMUSG00000024665.8	Fads2	0.287631	3.97249	11.4991	0.00239006	0.236535	488	476	590	683	745	534
	ENSMUSG00000047090.13	Tmem198b	-0.276454	3.90533	11.4856	0.00240178	0.237271	607	572.52	619.26	546.54	551.01	440.79
	ENSMUSG00000022893.14	Adamts1	-0.21363	6.65752	11.5809	0.00244856	0.239333	3725	3574	4677	3967	3678	3006
	ENSMUSG00000030149.15	Klrk1	0.455203	2.45595	11.4527	0.00243072	0.239333	170	153	181	303	234	180
	ENSMUSG00000035896.5	Rnase1	-0.419826	2.23069	11.4354	0.00244605	0.239333	181	185	220	147	161	143
	ENSMUSG00000039646.5	Vasn	-0.229861	4.9979	11.4411	0.00244101	0.239333	1128	1198.94	1474.93	1131	1165.84	1037.83
	ENSMUSG00000040147.14	Maob	0.265362	4.14922	11.4425	0.00243971	0.239333	571	565	632	824	747	628
	ENSMUSG00000097440.2	Gm6277	0.393005	2.91816	11.4409	0.00244114	0.239333	237.98	233.31	241.03	378.01	349.09	246.02
	ENSMUSG00000001870.16	Ltbp1	0.282828	6.42117	13.9843	0.00245506	0.239399	2795	2735	2966	4149	3752	2840
	ENSMUSG00000028378.6	Ptgr1	-0.224217	4.98369	11.4221	0.00245788	0.239399	1238	1192	1314	1109	1114	1079
	ENSMUSG00000028028.11	Alpk1	0.408842	4.44215	15.024	0.00247159	0.240312	696	661	689	1144	953	729
	ENSMUSG00000047036.8	Zfp445	0.214886	6.66069	11.5904	0.00248212	0.240914	3403	3436	3431	4506	4413	3468
	ENSMUSG00000021327.19	Zkscan3	0.209665	5.43747	11.3903	0.00248652	0.240919	1449.86	1464.71	1492.64	1842.24	1825.65	1606.63
	ENSMUSG00000024209.9	1700061G19Rik	-1.02247	-0.707249	11.3841	0.00249222	0.24105	21	30	32	15	15	12
	ENSMUSG00000024679.10	Ms4a6d	0.304069	5.30391	13.6214	0.00249915	0.241079	1245	1231	1412	1994	1602	1374
	ENSMUSG00000079014.4	Serpina3i	0.359609	3.45032	11.5683	0.00250123	0.241079	349.62	376.57	316.03	504.51	465.72	418.9
	ENSMUSG00000052751.16	Repin1	0.295744	3.71598	11.3686	0.00250635	0.241153	441	395	457	563	621.85	459
	ENSMUSG00000029720.9	Gm20605	-0.194314	6.14006	11.3593	0.00251482	0.241549	2621.02	2515.99	3165.68	2459.84	2689.41	2316.24
	ENSMUSG00000025492.6	Ifitm3	0.259597	8.80476	13.1669	0.00254742	0.244257	14710	13985	16121	21560	19316	14796.6
	ENSMUSG00000040613.14	Apobec1	0.280812	4.64419	11.8356	0.00255885	0.244826	871	731	879	1186	1114	826
	ENSMUSG00000118506.1	1700094D03Rik	-0.383655	2.78082	11.3082	0.00256219	0.244826	307.21	255.11	287.41	232.28	218.44	220.57
	ENSMUSG00000020396.8	Nefh	-1.99921	-2.24997	11.2945	0.0025751	0.245353	11	11	6	3	2	2
	ENSMUSG00000040018.9	Cox15	0.221426	4.8018	11.2882	0.00258099	0.245353	967.95	860.71	1000.87	1197.88	1194.94	1015.58
	ENSMUSG00000041773.8	Enc1	0.252594	4.38952	11.2892	0.00258011	0.245353	653	715	728	919	898	768
	ENSMUSG00000113047.1	Gm47469	0.895842	-0.255849	11.276	0.00259251	0.246027	18	23.91	18	39.16	36.27	40
	ENSMUSG00000031916.17	Cog8	0.216856	4.92423	11.2673	0.00260082	0.246393	988.35	1004.78	1090.09	1239.82	1313.93	1146.3
	ENSMUSG00000023087.15	Noct	-0.220907	5.25711	11.2578	0.00260993	0.246835	1555.99	1309	1669.92	1361.96	1489.97	1165
	ENSMUSG00000071658.5	Gng3	-0.704741	0.44618	11.245	0.00262211	0.247564	58.57	46.54	74.69	40.7	40.25	32.35
	ENSMUSG00000053835.17	H2-T24	0.892667	1.97578	16.4738	0.00263209	0.247662	115	90	92	248	210	119
	ENSMUSG00000063049.4	Ing2	-0.283778	3.72854	11.2392	0.00262775	0.247662	496	532	567	464	480	410
	ENSMUSG00000021036.10	Sptlc2	0.19098	6.20264	11.2242	0.00264217	0.24777	2377	2378	2822	3270	3003	2651
	ENSMUSG00000074578.14	Zfas1	0.218927	5.0551	11.2272	0.0026393	0.24777	1122	1091	1158	1456	1344	1254
	ENSMUSG00000027347.18	Rasgrp1	-0.265117	4.9128	11.7572	0.00265182	0.248254	1213	1127	1272	948	1084	1058
	ENSMUSG00000031774.8	Fam192a	0.206967	5.19869	11.2053	0.00266061	0.248657	1173	1200	1377	1596	1573	1304
	ENSMUSG00000040522.5	Tlr8	0.354108	3.19082	11.1911	0.0026745	0.249534	291	262	325	458	397	307
	ENSMUSG00000042857.3	Gm9776	0.62931	1.02298	11.1767	0.00268861	0.25043	46	69	55	99	94	80
	ENSMUSG00000020290.14	Xpo1	-0.198695	5.87322	11.1652	0.00270006	0.250653	2160	2110	2639	2067	2145	1974
	ENSMUSG00000104467.1	Gm37660	-0.539992	1.61181	11.1667	0.00269852	0.250653	135	110	148	109	106	65
	ENSMUSG00000025165.12	Sectm1a	0.23256	5.14545	11.1587	0.00270646	0.250827	1235	1129	1206	1591	1388	1354
	ENSMUSG00000088529.1	Gm26083	-3.66145	-3.01137	11.1516	0.00271352	0.251062	5.03	7.47	2.36	0	0	0.87
	ENSMUSG00000017493.12	Igfbp4	0.241523	8.17133	12.3914	0.00273923	0.252749	8776	9287	11076	12887	13196	9591
	ENSMUSG00000026121.13	Sema4c	-0.185905	6.9456	11.1213	0.00274401	0.252749	4578.61	4363.87	5537.69	4674.37	4561.41	3880.71
	ENSMUSG00000097937.1	Gm6967	0.873923	-0.0320758	11.1198	0.00274544	0.252749	24	30	17	48	52	36
	ENSMUSG00000024810.16	Il33	0.251623	4.71626	11.0966	0.00276905	0.25324	905	780	954	1249	1045	950
	ENSMUSG00000033174.17	Mgll	-0.209237	8.85652	11.2398	0.00276106	0.25324	17305	17130	20359	17957	17954	13200
	ENSMUSG00000048371.8	Pdp2	0.517769	1.90128	11.1082	0.00275723	0.25324	105	126	100	162	199	133
	ENSMUSG00000072844.6	G530011O06Rik	1.649	4.64665	39.273	0.00276642	0.25324	477.22	266.43	600.66	1486.76	1532.16	1289.73
	ENSMUSG00000034801.13	Sos2	-0.188623	5.93007	11.0896	0.00277619	0.253386	2430	2131	2591	2265	2274	1937
	ENSMUSG00000035352.3	Ccl12	0.329948	3.35822	11.0703	0.00279597	0.253386	282	342	371	443	447	400
	ENSMUSG00000041548.4	Hspb8	-0.197917	7.35956	11.0734	0.00279278	0.253386	6631	5499	7237	6122	6221	5070
	ENSMUSG00000057337.13	Chst3	-0.271708	4.29831	11.0771	0.00278899	0.253386	719	821	818	664	697	655
	ENSMUSG00000059498.13	Fcgr3	0.205662	5.88424	11.0742	0.00279193	0.253386	1926.5	1868.94	2247.67	2724.12	2368.13	2101.23
	ENSMUSG00000098488.7	Pla2g4b	-0.420831	2.36767	11.0683	0.00279808	0.253386	201.26	216.58	225.87	148.51	186.93	160.66
	ENSMUSG00000023284.15	Zfp605	0.650115	0.601442	11.0472	0.00281992	0.254532	38	42	45	73	71	59
	ENSMUSG00000050390.12	C77080	-0.236801	6.91035	12.1357	0.0028185	0.254532	4528	4490	5321	3993	4205	4280
	ENSMUSG00000022760.17	Thap7	0.281179	3.75888	11.0411	0.00282621	0.254651	441	434	463	607	557	516
	ENSMUSG00000026305.15	Lrrfip1	-0.184397	7.02509	11.0283	0.00283962	0.254651	5121	4687	5441	4734	4677	4411
	ENSMUSG00000033377.14	Palmd	-0.184402	6.11746	11.0324	0.00283534	0.254651	2689.83	2415.62	3037.46	2547.87	2635.87	2204
	ENSMUSG00000054203.7	Ifi205	0.187984	8.47276	11.0325	0.00283526	0.254651	11898	11377.4	13309	16011.5	14612.7	12456
	ENSMUSG00000026592.13	Tex35	-2.28379	-2.41293	11.0089	0.00285997	0.255649	9	8	8	0	3	2
	ENSMUSG00000091228.1	Gm20390	-0.236643	4.985	11.0116	0.00285715	0.255649	1149.76	1210.15	1410.21	1142.48	1054.4	1090.37
	ENSMUSG00000097923.1	Gm26577	-4.84616	-3.32957	11.1741	0.00291999	0.260593	3.07	3.07	4.12	0	0	0
	ENSMUSG00000008855.17	Hdac5	-0.185959	6.38359	10.9347	0.00293959	0.260664	3121	2998	3678	2968	3067.47	2820
	ENSMUSG00000025665.16	Rps6ka6	-0.293084	3.82397	10.9475	0.00292566	0.260664	558	486	674	531	470	440
	ENSMUSG00000035692.7	Isg15	0.453188	7.02963	19.5898	0.00293226	0.260664	4263	3673	4191	6765	5998	4494
	ENSMUSG00000103270.1	Gm37915	-1.03193	-0.577348	10.9376	0.00293639	0.260664	26.53	25.11	40.27	18.21	20.03	8.02
	ENSMUSG00000027536.6	Chmp4c	-0.197126	5.81712	10.9143	0.00296183	0.261888	2216.45	2130	2265.09	2009.19	2048.09	1896.14
	ENSMUSG00000029726.16	Mepce	0.239818	4.74992	10.9089	0.00296778	0.261888	882	925	894	1151	1122	1028
	ENSMUSG00000031631.15	Cfap97	0.31457	3.75001	10.9048	0.0029723	0.261888	429	451	430	637	525	524
	ENSMUSG00000075567.4	Krtap1-4	-0.517564	2.65323	12.4148	0.00297222	0.261888	220.22	231.22	364.11	228.12	181.05	174.15
	ENSMUSG00000017831.8	Rab5a	-0.203768	7.10078	10.9303	0.00297961	0.262116	5294.87	4573.87	6380.79	5003.77	4954.75	4518.91
	ENSMUSG00000024774.16	Ankrd22	-0.219962	5.32212	10.8686	0.00301251	0.26459	1657.58	1378.4	1701.85	1405.53	1419.51	1358.89
	ENSMUSG00000015488.14	Cacfd1	0.219236	4.75154	10.8636	0.00301802	0.264654	869	877	989	1163	1178	952
	ENSMUSG00000045624.15	Esf1	0.217433	4.77202	10.857	0.00302543	0.264885	881	884	1012	1202	1146	987
	ENSMUSG00000082101.3	Slfn14	2.78591	-2.52253	10.9346	0.00304265	0.265972	1	2	0	8	14	2
	ENSMUSG00000036291.6	Ap5m1	0.27066	3.98504	10.8308	0.00305502	0.266634	547.98	488.21	536.11	689.27	718.15	558.28
	ENSMUSG00000062082.16	Cd200r4	0.762443	0.388719	10.8225	0.0030645	0.266814	40	26	36	64	76	40
	ENSMUSG00000117499.1	Gm50010	0.646626	0.864019	10.8205	0.00306671	0.266814	39	57	55	98	79	68
	ENSMUSG00000044501.17	Zfp758	0.339088	3.12913	10.7721	0.00312244	0.271237	296.41	236	314.19	396	398	312
	ENSMUSG00000030107.10	Usp18	0.656753	6.13396	25.5716	0.00316143	0.274193	2129.98	1930.93	1909.98	3841.99	3416.95	2555.96
	ENSMUSG00000026181.13	Ppm1f	0.21902	4.78277	10.7226	0.00318054	0.27542	879	868	1053	1150	1141	1062
	ENSMUSG00000085126.1	Gm12589	0.708832	0.546299	10.7143	0.00319048	0.27585	40	39	38	52	84	62
	ENSMUSG00000007817.15	Zmiz1	-0.21751	7.54295	11.2282	0.00324577	0.276744	6771.95	6601.87	8797.89	6332.91	6941.82	6274.9
	ENSMUSG00000020464.15	Pnpt1	0.256096	5.66203	11.9326	0.00322411	0.276744	1833	1567	1661	2343	2105	1819
	ENSMUSG00000032262.13	Elovl4	-0.177823	9.70433	10.677	0.00323516	0.276744	32949	29593	34991	31689	30524	26788
	ENSMUSG00000039154.8	Shd	-0.618838	0.842452	10.6899	0.00321967	0.276744	81	79	72	54	49	53
	ENSMUSG00000039680.10	Mrps6	0.349737	2.82511	10.6972	0.00321092	0.276744	227.69	210.69	242.16	311.63	297.52	284.71
	ENSMUSG00000040033.16	Stat2	0.194714	8.43668	10.6871	0.00322302	0.276744	12212	11162	12131	15551	14540	12039
	ENSMUSG00000048706.3	Lurap1l	-0.346853	3.10527	10.6689	0.00324501	0.276744	304	351	401	299	277	278
	ENSMUSG00000074345.4	Tnfaip8l3	0.286008	3.72353	10.6772	0.00323494	0.276744	448	402	454	617	543	484
	ENSMUSG00000086231.1	Rapgef4os3	0.477267	1.7103	10.6749	0.00323774	0.276744	98	101	96	146	157	123
	ENSMUSG00000059552.13	Trp53	0.189635	5.85639	10.6601	0.00325564	0.27716	1966	1888	2095	2391	2365	2238
	ENSMUSG00000037752.4	Xkr8	0.513272	1.50653	10.6419	0.00327786	0.277415	72	79	102	141	131	101
	ENSMUSG00000038067.2	Csf3	-0.973821	2.7254	19.6651	0.00327387	0.277415	250	266	452	146	210	148
	ENSMUSG00000061068.7	Mcpt4	0.252003	5.73846	11.8413	0.00327685	0.277415	1642	1828.99	1878.99	2507	2288.97	1818
	ENSMUSG00000097004.1	4731419I09Rik	-0.324614	3.37521	10.6413	0.00327867	0.277415	361.94	398.06	508.88	364.78	349.09	326.96
	ENSMUSG00000113770.1	1700019C18Rik	-3.50356	-2.99907	10.6364	0.00328461	0.277495	3	3	9	0	0	1
	ENSMUSG00000048294.4	Krtap4-13	-0.472676	2.30831	10.8554	0.00329244	0.277733	165.58	187.99	278.16	166.37	147.86	151.32
	ENSMUSG00000115976.1	Gm31462	-3.22348	-2.67454	11.0054	0.00331377	0.279107	9	10	2	0	0	2
	ENSMUSG00000110386.1	Gm42031	-0.313086	3.99615	11.0286	0.00331937	0.279155	683.8	606.68	646.22	591.3	614.58	415.96
	ENSMUSG00000031549.16	Ido2	0.931871	1.26564	14.0492	0.00333087	0.279697	74	58	44	151	124	77
	ENSMUSG00000030533.16	Unc45a	-0.195542	6.93201	10.5941	0.00333704	0.279791	4594.48	4349.17	5438.14	4247.2	4375.53	4262
	ENSMUSG00000034853.16	Acot11	0.360841	2.79788	10.5825	0.00335164	0.280308	193	216	257	301	303.45	276
	ENSMUSG00000117104.1	Gm49893	1.43372	-1.54085	10.5811	0.00335332	0.280308	7	3	7	22	13	13
	ENSMUSG00000053318.7	Slamf8	0.607945	1.03677	10.57	0.00336733	0.281055	62	46	66	107	103	65
	ENSMUSG00000026980.15	Ly75	0.394702	2.6476	10.5511	0.00339135	0.281745	216	193	178.97	289	273	240
	ENSMUSG00000029470.15	P2rx4	0.197798	5.30552	10.5471	0.00339633	0.281745	1291	1297	1462	1730	1681	1393
	ENSMUSG00000030493.13	Faap24	0.442509	2.02718	10.5421	0.00340274	0.281745	126	127	121	166	195	165
	ENSMUSG00000046380.3	Jrk	0.588634	1.66062	11.0371	0.0034061	0.281745	83	113	75	147	136	140
	ENSMUSG00000078771.10	Evi2a	0.243418	5.16653	10.9629	0.00339476	0.281745	1204.39	1080.32	1336.68	1710.63	1539.24	1188.89
	ENSMUSG00000118239.1	Gm50107	0.501247	1.56064	10.5585	0.00338189	0.281745	82	94	87	122	140	123
	ENSMUSG00000070465.9	Gm9696	-0.455747	1.78392	10.5313	0.00341664	0.282196	151.18	127.35	153.94	115.45	110.24	99.51
	ENSMUSG00000038884.14	Shfl	0.333265	3.77112	10.9911	0.00346129	0.285035	462.25	394.69	467.61	677.44	618.64	437.04
	ENSMUSG00000079605.5	Zbtb9	0.586923	3.12162	14.3586	0.003459	0.285035	208.58	309.34	237.9	414.58	390.36	372.78
	ENSMUSG00000044350.14	Lacc1	0.21918	5.32309	10.4884	0.00347215	0.285505	1415	1246.01	1402.27	1838	1693	1371.64
	ENSMUSG00000043872.14	Zmym1	0.360223	2.69909	10.4708	0.00349514	0.286969	192.98	198	230	307	276.32	240
	ENSMUSG00000021583.7	Erap1	0.221274	5.1081	10.4604	0.00350882	0.287242	1193.78	1095.44	1207.19	1590.41	1451.4	1183.52
	ENSMUSG00000024456.16	Diaph1	-0.174371	7.38994	10.4636	0.0035046	0.287242	6390	6024	7180	6124	6106	5645
	ENSMUSG00000030779.16	Rbbp6	-0.183416	7.6732	10.4265	0.00355397	0.290508	8035	7201	8678	7369	7295	6995
	ENSMUSG00000004947.15	Dtx2	-0.211887	5.18907	10.4177	0.00356575	0.290613	1345	1367	1597	1224	1384	1222
	ENSMUSG00000026977.17	2007-03-01	-0.192175	6.55627	10.4202	0.00356238	0.290613	3654	3174	4257	3593	3392	2998
	ENSMUSG00000015812.8	Gnrh1	-0.618715	0.816708	10.3991	0.00359078	0.291205	84	68	76	58	58	38
	ENSMUSG00000022971.18	Ifnar2	0.202912	5.33951	10.3968	0.00359402	0.291205	1402.49	1276	1459	1798	1735	1398
	ENSMUSG00000040528.15	Milr1	0.40024	2.70694	10.4017	0.00358736	0.291205	217	191	205	343	274	223
	ENSMUSG00000048766.6	Skint10	-0.408182	3.42183	11.7511	0.00358607	0.291205	483	379	479	301	363	372
	ENSMUSG00000032281.11	Acsbg1	0.196344	8.15262	10.3856	0.0036092	0.292008	9285	9625	10240	11162	11900	11344
	ENSMUSG00000102461.1	Gm37166	-1.01499	-0.749973	10.3805	0.00361607	0.292137	28	27	25	17	16	8
	ENSMUSG00000112474.1	Gm46209	-4.92239	-3.29585	10.5473	0.00366131	0.295361	6.85	1.97	1.96	0	0	0
	ENSMUSG00000030483.14	Cyp2b10	0.206299	5.43588	10.3361	0.00367733	0.295793	1442	1490	1473	1817	1826	1618
	ENSMUSG00000043157.8	Arl11	-0.802404	0.221827	10.3377	0.00367503	0.295793	44	57	55	31	44	18
	ENSMUSG00000032313.11	Tmem266	0.395692	2.41647	10.3275	0.00368923	0.295891	166	150	187	244	210	226
	ENSMUSG00000042447.13	Mios	0.210883	4.84046	10.3284	0.00368799	0.295891	988	923	1003	1209	1229	1050
	ENSMUSG00000033102.15	Cdc14b	-0.187849	5.66342	10.3069	0.00371805	0.296118	1977	1836	2124	1784	1891	1697
	ENSMUSG00000047428.14	Dlk2	-0.280815	3.66537	10.3083	0.0037162	0.296118	466	499	562	467	428	401
	ENSMUSG00000048764.16	Tmprss11f	-0.338763	3.09467	10.3153	0.00370627	0.296118	367	331	344	288	280	282
	ENSMUSG00000061527.7	Krt5	-0.254293	11.6088	12.1798	0.00371877	0.296118	113173	115814	146375	105795	107341	108986
	ENSMUSG00000085977.1	Gm5970	-0.365772	3.7741	11.5406	0.0037122	0.296118	543	502	650	554	467	341
	ENSMUSG00000037999.13	Arap2	-0.181388	6.15938	10.2982	0.00373036	0.296614	2841.78	2466.97	3060.76	2709.41	2631	2272.7
	ENSMUSG00000019761.10	Krt10	-0.266533	13.7617	12.7122	0.00374029	0.296936	542582	527376	599949	450284	478493	495348
	ENSMUSG00000033039.10	Micall1	-0.177357	6.9956	10.2878	0.00374512	0.296936	4915.07	4553.62	5451.97	4636.97	4596.07	4342.97
	ENSMUSG00000036948.17	Map11	0.235708	4.48172	10.2735	0.00376545	0.297696	724	735	792	948	899	885
	ENSMUSG00000044703.5	Phf11a	0.619567	1.18017	10.3507	0.00376509	0.297696	60.97	70.86	58.76	130.06	106.83	69.05
	ENSMUSG00000032905.5	Atg12	0.204027	5.07517	10.2579	0.00378779	0.298524	1140	1111	1187	1477	1403	1218
	ENSMUSG00000050954.15	Zfp169	0.427606	3.09006	11.2821	0.00378878	0.298524	274	291	223	398	374	331
	ENSMUSG00000115338.2	Pnp	0.23054	7.57494	11.3378	0.00379208	0.298524	6507.56	6172.95	6592.55	8847.79	8355.18	6304.9
	ENSMUSG00000032235.15	Ice2	0.311963	3.3111	10.2452	0.00380601	0.299196	326	326	314	432	439	372
	ENSMUSG00000108732.1	2310043P16Rik	0.625826	1.37565	10.7343	0.00381783	0.2997	78	80	60	145	125	82
	ENSMUSG00000021428.9	Riok1	-0.193675	5.55476	10.23	0.00382804	0.300076	1811	1705	2003	1669	1684	1612
	ENSMUSG00000045608.7	Dbx2	0.742275	0.233666	10.2222	0.00383937	0.30054	30	27	35	63	62	35
	ENSMUSG00000035458.15	Tnni3	0.526856	1.28439	10.2142	0.00385103	0.301027	72	71	71	125	108	87
	ENSMUSG00000024675.19	Ms4a4c	0.798918	2.48192	15.5279	0.0038759	0.301899	160	135.66	147	350	284.87	169.76
	ENSMUSG00000030717.9	Nupr1	0.190571	7.75994	10.2014	0.00386975	0.301899	7377	7201	7663	9845	8981	7494
	ENSMUSG00000078664.2	Sprr2a1	0.522581	1.57534	10.1955	0.00387853	0.301899	99.76	63.9	101.37	126.43	132.81	131.35
	ENSMUSG00000073489.6	Ifi204	0.472458	7.51856	19.017	0.00388671	0.302111	5818.11	5391.52	5649.75	9735.66	8099.4	6498.03
	ENSMUSG00000022305.13	Lrp12	-0.274841	4.03079	10.1732	0.00391145	0.302336	561	634	775	561	612	504
	ENSMUSG00000034810.7	Scn7a	0.267869	4.26609	10.1756	0.00390796	0.302336	644	556	721	927	813	651
	ENSMUSG00000050533.3	Gm9845	0.625458	0.727885	10.1784	0.00390381	0.302336	49.49	39.81	48.98	85.97	79.77	55.61
	ENSMUSG00000050919.9	Zfp366	0.398171	2.44457	10.181	0.00389989	0.302336	186	152	173	268	238	192
	ENSMUSG00000069874.7	Irgm2	0.703515	7.38529	25.8047	0.00391688	0.302336	5164.93	4342.08	4435.53	9128.4	8357.96	6187.65
	ENSMUSG00000057396.7	Zfp759	0.610401	0.7682	10.1633	0.0039262	0.302389	48	51	44	77	76	73
	ENSMUSG00000101660.1	Gm18666	-4.84537	-3.3354	10.355	0.00392848	0.302389	2.93	5.47	1.76	0	0	0
	ENSMUSG00000108601.1	Gm44645	-0.435871	2.01629	10.1412	0.00395936	0.304343	184	147	175	129	127	129
	ENSMUSG00000018930.3	Ccl4	-0.477396	4.88747	16.506	0.00397723	0.30445	1139	1068	1608	906	1101	808
	ENSMUSG00000025209.5	Twnk	0.218146	4.88851	10.1328	0.0039721	0.30445	933.55	1014.13	1056.67	1243.71	1220.19	1143.17
	ENSMUSG00000050914.16	Ankrd37	0.462312	1.66834	10.1359	0.00396743	0.30445	94.83	94.91	98.98	136	141.53	133
	ENSMUSG00000022788.16	Fgd4	-0.264317	3.93117	10.1253	0.00398338	0.3045	616	523	693	545	573	455
	ENSMUSG00000056537.11	Rlim	-0.174761	6.6277	10.1063	0.00401231	0.30629	3863	3576	4098	3817	3652	3099
	ENSMUSG00000053522.11	Lgals7	-0.19492	9.94806	10.0981	0.00402495	0.306648	37494	36842	41729	34305	34769	35108
	ENSMUSG00000108696.1	Gm5738	-0.753937	-0.0167729	10.0961	0.00402807	0.306648	43	37	50	26	25	28
	ENSMUSG00000080942.1	Zfp36l1-ps	2.60238	-2.63696	10.0892	0.00403862	0.307029	1	2	0	9	9.01	3
	ENSMUSG00000024158.17	Hagh	-0.217746	4.81057	10.0833	0.00404777	0.307045	1065	1008	1250	948	1056	935
	ENSMUSG00000029154.13	Cwh43	-0.208203	4.84636	10.0819	0.00404991	0.307045	1073	1106	1208	1017	1084	927
	ENSMUSG00000023905.15	Tnfrsf12a	-0.24035	4.32009	10.0502	0.00409917	0.309763	746	725	911	733	762	587
	ENSMUSG00000031487.5	Brf2	0.38156	2.52333	10.0546	0.00409223	0.309763	159	185	200	257	274	203
	ENSMUSG00000052560.15	Cpne8	0.203874	6.56597	10.2616	0.00410253	0.309763	3357	2910	3422	4394	3801	3345
	ENSMUSG00000016493.13	Cd46	0.385426	2.61584	10.0416	0.00411273	0.310111	199.6	162.27	218.97	293.57	287.64	203.99
	ENSMUSG00000032349.13	Elovl5	0.194718	6.65544	10.0185	0.00414915	0.312008	3485	3167	3694	4502	4447	3329
	ENSMUSG00000042523.12	Dnal1	0.251043	3.94087	10.0202	0.00414635	0.312008	489.17	499.67	548.6	673	647.25	570
	ENSMUSG00000041700.9	Lhfpl1	-0.383781	2.31816	10.0122	0.00415913	0.312335	205	177	235	170	171	146
	ENSMUSG00000022382.15	Wnt7b	-0.267971	4.1974	10.0056	0.00416967	0.312703	660	723.27	819	582	676	623
	ENSMUSG00000110144.1	Gm45564	0.434015	1.95255	9.99584	0.00418523	0.313445	116	102	140	188	171	140
	ENSMUSG00000022853.7	Ehhadh	0.307273	3.37515	9.99072	0.00419344	0.313637	320	356	336	456	455	387
	ENSMUSG00000022507.6	1810013L24Rik	-0.194535	6.2951	9.98045	0.00420995	0.313771	3112	2623	3518	3017	2931	2390
	ENSMUSG00000028874.14	Fgr	0.31511	3.38006	9.97895	0.00421236	0.313771	366	278	374	463	430	410
	ENSMUSG00000043702.9	Pde12	-0.173245	6.56083	9.97203	0.00422355	0.313771	3629.99	3309.92	4090.68	3469.25	3452.55	3146.48
	ENSMUSG00000068246.6	Apol9b	0.504503	3.63666	13.6753	0.0042192	0.313771	411.21	366.22	343.95	680.19	534.85	441.74
	ENSMUSG00000099689.6	Zfp383	0.411318	2.50116	9.97366	0.00422091	0.313771	193	164	171	276	272	183
	ENSMUSG00000031985.9	Gnpat	0.184263	5.85196	9.96777	0.00423044	0.313862	2038.75	1787.57	2123.31	2430.55	2524.36	2033.9
	ENSMUSG00000028063.15	Lmna	-0.241719	8.96013	11.3896	0.00427248	0.315843	17843	18578	23178	16508	17867	17269
	ENSMUSG00000030859.8	Fam24a	-2.90623	-2.85166	9.94618	0.00426557	0.315843	2	7	8	1	0	1
	ENSMUSG00000039458.15	Mtmr12	-0.187593	6.32242	9.94089	0.00427423	0.315843	3021	2733	3660	2835	3032	2627
	ENSMUSG00000033323.14	Ctdp1	-0.18781	5.75321	9.92799	0.00429543	0.316986	2045.96	1938.97	2341.97	1891.98	1967.94	1850.98
	ENSMUSG00000005268.20	Prlr	-0.195457	5.00808	9.86116	0.00440707	0.317672	1252	1143	1386	1163	1201	1040
	ENSMUSG00000005774.12	Rfx5	0.220846	4.62333	9.88001	0.00437527	0.317672	821.09	828.13	844.92	1054.02	1057.62	898.48
	ENSMUSG00000019982.15	Myb	-0.323665	3.04068	9.86068	0.00440789	0.317672	298.93	321.93	381.88	272	295	258
	ENSMUSG00000021874.12	4933413J09Rik	-0.665908	0.432709	9.87928	0.0043765	0.317672	65	44	67	40	39	35
	ENSMUSG00000022468.12	Endou	-0.206034	6.55795	10.2238	0.00433872	0.317672	3575	3488	4049	3137	3402	3353
	ENSMUSG00000025085.16	Ablim1	-0.184002	8.34757	9.9041	0.00433497	0.317672	12723	11615	13830	11227	12014	11303
	ENSMUSG00000029687.16	Ezh2	0.216423	4.98082	9.91221	0.00432151	0.317672	1093	1043	1065	1331	1290	1222
	ENSMUSG00000030583.16	Sipa1l3	-0.208726	6.27514	10.2547	0.00436461	0.317672	2862	2787	3513	2606	2799	2722
	ENSMUSG00000031734.13	Irx3	-0.323977	6.06363	13.6312	0.00439715	0.317672	2425.91	2488.97	3304.98	2148.96	2309.98	2258.98
	ENSMUSG00000035504.16	Reep6	0.297688	3.61175	9.87139	0.00438979	0.317672	356	418	426	543	564	423
	ENSMUSG00000043091.9	Tuba1c	-0.175686	8.0041	9.86598	0.00439891	0.317672	9560.71	9407.43	11036.3	9236.11	9261.77	8824.1
	ENSMUSG00000046223.10	Plaur	-0.262263	4.26594	9.88025	0.00437487	0.317672	723	682	908	754	698	539
	ENSMUSG00000048895.13	Cdk5r1	-0.325347	3.38897	9.8716	0.00438942	0.317672	376	438	462	339	345	363
	ENSMUSG00000060201.5	Spink7	-0.499309	2.615	11.1846	0.00439052	0.317672	265	295	218	194	185	192
	ENSMUSG00000070524.1	Fcrlb	0.847996	-0.26769	9.88272	0.00437071	0.317672	14	21	26	38	36	39
	ENSMUSG00000086695.1	Gm15247	1.48549	-1.8293	9.90271	0.0043373	0.317672	4	3	6	11	13	14
	ENSMUSG00000099757.1	BE692007	0.323924	3.3179	9.89719	0.00434649	0.317672	307.39	274.57	391.85	470.96	444.61	341.63
	ENSMUSG00000114689.1	Gm9465	-0.622654	0.693858	9.87925	0.00437655	0.317672	74	53	83	45	51	44
	ENSMUSG00000001583.13	Tnk1	0.220448	4.614	9.84835	0.00442885	0.317958	771.56	799.73	914.63	1040.5	994.2	948.12
	ENSMUSG00000004054.9	Map3k11	-0.222323	5.83124	10.3977	0.00442759	0.317958	2065.8	2198.97	2481.67	1909.6	2016.38	2013.91
	ENSMUSG00000117113.1	Gm49883	-0.270987	3.5648	9.84822	0.00442907	0.317958	459.56	432.43	528.99	412.84	425.72	374.6
	ENSMUSG00000027490.17	E2f1	-0.400555	2.7581	9.94443	0.00445888	0.318786	222	272	351	205	243	209
	ENSMUSG00000028919.11	Arhgef19	-0.260197	4.08287	9.83583	0.00445023	0.318786	629	613	792	555	653	539
	ENSMUSG00000043029.2	Trpv3	-0.23583	5.45454	10.4666	0.00446126	0.318786	1759	1661	1786	1474	1511	1563
	ENSMUSG00000048251.15	Bcl11b	-0.18892	6.09716	9.82803	0.00446361	0.318786	2598	2442	2998	2513	2357	2372
	ENSMUSG00000050063.18	Klk6	-0.334349	2.93799	9.79964	0.00451268	0.321876	303	271	364	249	269	246
	ENSMUSG00000040631.8	Dok4	-0.227224	4.43702	9.78107	0.0045451	0.323771	791.32	786.47	995.93	783.31	801.05	679.83
	ENSMUSG00000020415.16	Pttg1	0.221624	4.69461	9.76107	0.00458029	0.325025	879	851	891	1158	1108	903
	ENSMUSG00000028635.7	Edn2	-0.598605	1.06769	9.76532	0.00457278	0.325025	94	64	115	56	62	66
	ENSMUSG00000050332.7	Amer1	0.277411	4.58325	10.4836	0.0045803	0.325025	842	764	766	1089	1102	801
	ENSMUSG00000030917.13	Tmem159	0.181609	5.92011	9.74588	0.00460721	0.326517	1951.95	2060.98	2222.96	2612.96	2566.97	2138.93
	ENSMUSG00000045394.9	Epcam	-0.21096	6.35897	10.2166	0.0046187	0.326913	3032	3104	3559	2837	2830	2931
	ENSMUSG00000027829.15	Ccnl1	-0.208369	7.18394	10.2261	0.00463589	0.327711	5624.04	4799.13	6824.48	5467.98	5444	4447.93
	ENSMUSG00000041135.15	Ripk2	0.218138	4.53118	9.72073	0.00465219	0.328444	752	754	841	1011	1002	812
	ENSMUSG00000025582.4	Nptx1	-0.421543	3.88698	12.3276	0.00469224	0.329864	682	554	620	437	468	518
	ENSMUSG00000025588.4	Nat1	-3.54438	-2.99724	9.7028	0.00468454	0.329864	5	9	1	0	1	0
	ENSMUSG00000025978.14	Rftn2	0.3203	3.27125	9.69642	0.00469611	0.329864	292.22	323.44	321.91	410.9	470.29	334.35
	ENSMUSG00000106205.1	C230096K16Rik	-0.508642	1.56363	9.70619	0.0046784	0.329864	105	135	135.71	102	79	91
	ENSMUSG00000046694.6	Tent5b	-0.368257	7.25596	15.016	0.00471758	0.330953	6046	5442	7567	4811	5075	5190
	ENSMUSG00000032033.11	Barx2	-0.279839	5.23969	11.3357	0.00472717	0.331121	1333	1505	1723	1304	1238	1313
	ENSMUSG00000047777.9	Phf13	-0.26045	4.06949	9.67678	0.00473193	0.331121	666	601	745	555	584	585
	ENSMUSG00000067825.11	Pex26	0.205417	5.1167	9.66249	0.00475818	0.332409	1136	1173	1227	1467	1393	1347
	ENSMUSG00000103092.1	Pcdha5	4.72904	-3.36846	9.83655	0.00476232	0.332409	0	0	0	2.95	2.4	4.32
	ENSMUSG00000003949.16	Hlf	-0.17197	6.3018	9.65006	0.00478114	0.332854	2938	2900	3364	2812	2933	2667
	ENSMUSG00000029708.9	Gcc1	-0.19171	5.23425	9.64705	0.00478672	0.332854	1370	1441.28	1601.41	1392	1416.97	1183.78
	ENSMUSG00000103334.1	Gm29771	-2.17454	-2.48385	9.6522	0.00477718	0.332854	9	7	7	2	3	0
	ENSMUSG00000025555.14	Farp1	0.213372	5.26947	9.64296	0.00479432	0.332965	1267	1180	1490	1746	1704	1272
	ENSMUSG00000026558.13	Uck2	-0.16882	6.95611	9.63147	0.00481571	0.334032	4760	4420	5298	4619	4476	4166
	ENSMUSG00000033880.11	Lgals3bp	0.491705	6.58523	18.4458	0.00482356	0.334158	2927	2720	3134	5042	4602	3199
	ENSMUSG00000039813.14	Tbc1d2	-0.260305	4.11326	9.61834	0.0048403	0.334482	651	675	744	569	602	606
	ENSMUSG00000061894.15	Zscan20	0.476893	1.93094	9.61913	0.00483882	0.334482	97	138	109	163	183	151
	ENSMUSG00000044968.16	Napepld	0.400797	2.31654	9.61342	0.00484955	0.334565	166	128	174	239	229	171
	ENSMUSG00000072680.11	Tmem254c	-0.184631	6.27462	9.61128	0.00485357	0.334565	2748.22	2881.62	3449.82	2748.59	2833.46	2630.73
	ENSMUSG00000021566.7	Slc6a19os	0.813459	-0.106011	9.59909	0.0048766	0.334639	19	20	31	34	44	48
	ENSMUSG00000031907.9	Zfp90	0.272149	3.80516	9.60228	0.00487055	0.334639	434	462	491	648	613	476
	ENSMUSG00000035678.8	Tnfsf9	-0.486762	1.54857	9.59792	0.00487881	0.334639	113	106	152	83	106	83
	ENSMUSG00000101729.1	Gm17796	-0.686896	0.473821	9.60587	0.00486377	0.334639	58	72	51	39	46	32
	ENSMUSG00000032024.10	Clmp	0.270603	5.61351	11.3651	0.00489951	0.334816	1600.42	1490.68	1795.23	2345.18	2193.89	1575.95
	ENSMUSG00000039456.10	Morc3	0.203774	5.52998	9.5871	0.00489933	0.334816	1607	1463	1649	2127	1946	1561
	ENSMUSG00000056260.15	Lrif1	0.328047	4.87558	12.0136	0.0048904	0.334816	993	754	1128	1366	1325	1029
	ENSMUSG00000005410.6	Mcm5	-0.240082	4.55192	9.57905	0.00491469	0.335027	796	923	1077	862	834	743
	ENSMUSG00000086578.2	Gm13583	-0.538208	1.27256	9.58071	0.00491152	0.335027	77.65	106.09	125.58	71.84	78.33	68.87
	ENSMUSG00000011256.16	Adam19	-0.43961	3.46591	11.6692	0.00494326	0.335736	364	444	594	346.66	411.77	305
	ENSMUSG00000049972.4	Skint9	-0.265176	4.10973	9.56687	0.004938	0.335736	709	641	717	548	622	600
	ENSMUSG00000056529.7	Ptafr	-0.328701	3.04016	9.56913	0.00493366	0.335736	301	295	411	290	287	247
	ENSMUSG00000043681.5	Fam25c	-0.258274	8.49822	11.5641	0.00494963	0.335757	13651	13846	15881	11805	12447	12935
	ENSMUSG00000044786.6	Zfp36	-0.305679	7.4732	12.9866	0.00497324	0.336565	6311	6517	8921	5842	6551	5644.97
	ENSMUSG00000063268.12	Parp10	0.263611	6.54421	11.6358	0.00497975	0.336565	3093.84	3020.29	3200.25	4555.7	3886.28	3170.46
	ENSMUSG00000109877.1	Gm45609	-0.648384	2.23608	12.1407	0.00497906	0.336565	173.38	224.46	229.04	110.95	134.02	164.44
	ENSMUSG00000031834.15	Pik3r2	-0.205958	6.0962	9.87809	0.00499589	0.337244	2477	2541	3060	2290	2496	2401
	ENSMUSG00000046798.14	Cldn12	-0.184128	5.27609	9.53245	0.00500454	0.337417	1497	1392	1646	1419	1424	1272
	ENSMUSG00000020184.15	Mdm2	-0.171624	5.83118	9.51021	0.00504804	0.339875	2200	2031	2408	2102	2110	1866
	ENSMUSG00000028101.18	Pias3	-0.220194	5.21583	9.62103	0.00505326	0.339875	1377	1410	1612	1202	1382	1298
	ENSMUSG00000004929.12	Thop1	-0.249377	6.42005	11.1293	0.00513242	0.340454	3133	3297	3814	2798	3006	3036
	ENSMUSG00000014599.10	Csf1	0.169879	6.7119	9.47773	0.00511233	0.340454	3433	3469	3958	4543	4435	3655
	ENSMUSG00000017929.13	B4galt5	0.270329	5.49999	11.1511	0.00511499	0.340454	1581	1296	1641	2126	2026	1494
	ENSMUSG00000020057.2	Dram1	0.210945	5.42396	9.5137	0.00512943	0.340454	1437	1349	1593	2024	1792	1433
	ENSMUSG00000022053.13	Ebf2	-0.290217	3.45145	9.47763	0.00511252	0.340454	434.58	370.83	518.93	390.52	398.49	325.91
	ENSMUSG00000030016.14	Zfp638	0.187702	5.1575	9.46687	0.00513403	0.340454	1193	1173	1300	1518	1526	1274
	ENSMUSG00000035852.11	Misp	0.809122	-0.0540102	9.46873	0.00513031	0.340454	23	28	21	53	51	28
	ENSMUSG00000036249.16	Rbm43	0.305987	5.07772	11.663	0.00508796	0.340454	1172	1083	1050	1602	1492	1159
	ENSMUSG00000038119.15	Cdon	-0.246062	5.95988	10.8663	0.0051356	0.340454	2299	2334	2811	2046	2572	1866
	ENSMUSG00000079025.9	Gsdmc	-0.58315	5.31744	19.0689	0.0050841	0.340454	1760.38	1594.39	1908.08	1148.28	1106.17	1337.4
	ENSMUSG00000081769.9	Gm12216	0.508515	1.76945	9.55566	0.00507433	0.340454	111	101	91	183	160	107
	ENSMUSG00000110030.1	Gm45546	-1.46916	-1.57685	9.48258	0.00510267	0.340454	7	21	18	6	8	3
	ENSMUSG00000020923.17	Ubtf	-0.171188	7.347	9.4614	0.005145	0.34067	5903	5925	7191	5838	6084	5455
	ENSMUSG00000006456.10	Rbm14	0.219206	4.52834	9.45683	0.00515419	0.340871	715.13	769.55	857.74	975.89	962.35	873.81
	ENSMUSG00000028393.10	Alad	0.261135	3.72264	9.45125	0.00516541	0.341207	402	430	485	554	590	486
	ENSMUSG00000050002.14	Idnk	0.250154	3.98108	9.44271	0.00518267	0.341815	544	497	539	703	687	557
	ENSMUSG00000096326.2	Ighv1-78	-4.66162	-3.4138	9.6097	0.00518696	0.341815	3	2	4	0	0	0
	ENSMUSG00000028737.15	Aldh4a1	-0.169781	6.08786	9.42493	0.00521878	0.343096	2597.2	2396.43	2942.21	2438.11	2606.21	2224.88
	ENSMUSG00000107244.1	Gm43699	0.77406	0.0765491	9.42692	0.00521472	0.343096	18	33	30	53	42	48
	ENSMUSG00000030823.6	9130019O22Rik	0.444005	1.62273	9.39419	0.00528185	0.345195	89.65	89.84	102.42	142.71	138.38	115.33
	ENSMUSG00000050567.16	Maml1	-0.177715	5.70972	9.40257	0.00526457	0.345195	1953.97	1860.93	2308.97	1988.98	1953	1642
	ENSMUSG00000059970.7	Hspa2	0.190528	6.17749	9.40621	0.00525708	0.345195	2437	2180	2843	2939	2912	2879
	ENSMUSG00000079645.2	Gm17193	1.32336	-1.29949	9.39973	0.00527043	0.345195	2	8	12	23	15	19
	ENSMUSG00000089857.9	Zfp882	1.06303	-1.1489	9.39575	0.00527863	0.345195	9	10	9	21	23	17
	ENSMUSG00000038765.13	Lmx1b	-0.508761	1.18697	9.37451	0.00532267	0.347223	83	99	106	72	75	62
	ENSMUSG00000102504.1	Gm21955	0.349383	2.97869	9.3732	0.00532541	0.347223	244.71	255.98	255	399.43	332.6	268.13
	ENSMUSG00000048830.3	2310057N15Rik	-1.07436	3.65216	22.4993	0.00534649	0.347755	477.71	554.19	855.76	323.89	267.6	320.4
	ENSMUSG00000085596.1	Gm11476	0.901755	-0.667993	9.36029	0.0053524	0.347755	12.01	13	19.01	30.01	30	25.01
	ENSMUSG00000109864.1	Eid3	-0.649634	0.673833	9.36371	0.00534524	0.347755	57	75	76	38	45	53
	ENSMUSG00000024457.16	Trim26	0.182632	6.71613	9.35071	0.00537252	0.348611	3584	3436	3808	4661	4584	3504
	ENSMUSG00000037762.6	Slc16a9	0.217044	4.74277	9.34505	0.00538444	0.348611	894	905	914	1142.26	1086.91	1029.74
	ENSMUSG00000108432.1	Gm44756	-0.950428	-0.750727	9.34538	0.00538375	0.348611	20.61	28.19	30.2	14.7	11.65	15.51
	ENSMUSG00000027947.11	Il6ra	-0.166707	7.25036	9.33308	0.00540976	0.349434	5833.63	5415.53	6493.78	5446.35	5662.62	5160.85
	ENSMUSG00000029553.10	Tfec	0.395451	2.18277	9.33466	0.00540641	0.349434	135	138	153	219	208	154
	ENSMUSG00000107023.2	Gm42715	-0.188957	5.96567	9.32092	0.00543561	0.350695	2453.62	2294.28	2570.76	2089.43	2402.82	2126.17
	ENSMUSG00000074364.6	Ehd2	-0.200551	6.66442	9.63819	0.00545204	0.350938	3493	3778	4706	3629	3950	3160
	ENSMUSG00000096727.3	Psmb9	0.436958	4.63658	13.8061	0.00544937	0.350938	813.42	757.5	741.19	1305.9	1101.25	853.3
	ENSMUSG00000028019.9	Pdgfc	0.215356	4.7126	9.29747	0.00548585	0.352343	823.99	891.96	946.98	1167.91	1074.9	953.93
	ENSMUSG00000049488.14	Tmem67	0.363417	3.3504	9.92442	0.00548659	0.352343	359.04	311.74	301.65	513.08	441.43	347.63
	ENSMUSG00000117955.1	Gm50205	1.13732	-0.943089	9.29344	0.00549454	0.352445	6.15	11.8	13.79	20.33	37.58	15.02
	ENSMUSG00000036381.13	P2ry14	0.34489	2.57505	9.2894	0.00550325	0.352596	196	168	209	259	268	224
	ENSMUSG00000027761.4	Aadac	-0.263588	4.29185	9.41196	0.00555349	0.35377	766	805	767	770	698	557
	ENSMUSG00000035476.9	Tab3	-0.194175	4.91717	9.2679	0.00554992	0.35377	1192	1104	1246	1087	1131	979
	ENSMUSG00000049122.17	Frmd3	0.663006	0.528864	9.26992	0.00554553	0.35377	43	31	44	79	71	44
	ENSMUSG00000106928.1	Gm43860	-0.258745	3.90697	9.26699	0.00555191	0.35377	648	522	623	538	537	472
	ENSMUSG00000110702.1	Gm45767	-0.63169	0.390265	9.26936	0.00554674	0.35377	60.02	49.07	59.66	41.78	37.97	32.61
	ENSMUSG00000020467.15	Efemp1	0.183059	5.95211	9.25913	0.00556909	0.354357	1947	1997	2450	2732	2548	2204
	ENSMUSG00000083282.3	Ctsf	0.222131	5.46072	9.66369	0.00558833	0.355173	1467	1457	1538	1994	1985	1432
	ENSMUSG00000045598.10	Zfp553	0.264446	3.78531	9.24184	0.00560709	0.355957	447	453	471	558	580	560
	ENSMUSG00000001288.15	Rarg	-0.209586	6.8583	9.85371	0.00561425	0.356004	4128	4378	5214	3871	4276	4033
	ENSMUSG00000040860.16	Crocc	-0.333275	2.90702	9.22848	0.00563663	0.357014	297	269	351	259	289	204
	ENSMUSG00000031950.7	Gabarapl2	-0.199312	6.53295	9.51993	0.00565432	0.357096	3507.83	3251.73	4163.91	3129.33	3354.23	3267.89
	ENSMUSG00000039087.17	Rreb1	-0.166826	6.27979	9.2192	0.00565725	0.357096	3002	2735	3316	2858	2845	2601
	ENSMUSG00000059714.13	Flot1	0.184429	5.62706	9.22474	0.00564494	0.357096	1609	1568	1921	2190	1984	1796
	ENSMUSG00000012819.15	Cdh23	0.482604	1.40451	9.2037	0.0056919	0.35874	77	72	89	111	138	95
	ENSMUSG00000020914.17	Top2a	0.178425	7.01476	9.20176	0.00569624	0.35874	4282	4510	4519	5441	5334	4811
	ENSMUSG00000031431.13	Tsc22d3	0.177654	9.10752	9.19442	0.00571275	0.359371	19288	18475	19057	23972	23007	19642
	ENSMUSG00000071369.11	Map3k5	0.20945	4.64121	9.18899	0.00572498	0.359733	815	842	881	1030	1076	928
	ENSMUSG00000032826.18	Ank2	0.275178	4.98471	10.5023	0.00575757	0.361371	1027	1004	1116	1529	1418	1011
	ENSMUSG00000085826.1	Gm15638	-1.34255	-1.71833	9.16634	0.00577633	0.362138	13	11	16	7	4	5
	ENSMUSG00000003227.4	Edar	0.452581	1.70113	9.15301	0.00580679	0.362991	95	103	98	156	153	112
	ENSMUSG00000041845.11	Rhod	-0.221307	4.72729	9.15179	0.00580958	0.362991	997.82	965.93	1174.88	886.88	947.92	928.9
	ENSMUSG00000056383.10	AI987944	0.328355	3.06686	9.15302	0.00580677	0.362991	279.93	269.39	260.1	398.64	365.82	291.67
	ENSMUSG00000041872.9	Il17f	-1.3618	-1.78309	9.14873	0.0058166	0.36302	13	11	14	6	4	5
	ENSMUSG00000049699.4	Ucn2	-0.286452	3.28402	9.14354	0.00582854	0.363356	374	380	418	325	351	315
	ENSMUSG00000056153.15	Socs6	-0.188749	5.69385	9.14062	0.00583526	0.363366	2013	1739	2335.04	1977	1911	1613
	ENSMUSG00000069206.14	Zfp874a	0.365988	2.76117	9.13702	0.00584357	0.363475	232.87	211.97	199.04	332.29	285.76	244.11
	ENSMUSG00000089694.2	Nat8f7	-1.51776	-1.95814	9.12545	0.00587033	0.364731	8.59	11.14	13.99	5.29	2.33	4.24
	ENSMUSG00000009185.2	Ccl8	0.260035	4.52136	9.50443	0.0059117	0.366373	656	732	915	1049	909	877
	ENSMUSG00000028245.15	Nsmaf	0.175826	5.58642	9.10558	0.00591661	0.366373	1637	1529	1799	2038	2083	1677
	ENSMUSG00000078584.9	AU022252	0.220078	4.3304	9.11016	0.00590591	0.366373	672.57	633.02	735.43	846.39	823.94	778.79
	ENSMUSG00000003269.17	Cyth2	-0.18684	5.17776	9.09271	0.0059468	0.366587	1348.72	1326.44	1565.85	1330.82	1292.48	1212.66
	ENSMUSG00000022101.6	Fgf17	-1.827	-2.34569	9.08754	0.00595897	0.366587	8	9	8	1	3	3
	ENSMUSG00000025571.13	Tnrc6c	-0.169473	5.89875	9.07881	0.00597959	0.366587	2274	2113	2571	2149	2228	1993
	ENSMUSG00000030322.12	Mbd4	0.380179	2.4706	9.09563	0.00593992	0.366587	172	169	183	260.97	271	177
	ENSMUSG00000030393.8	Zik1	0.655419	0.26755	9.08587	0.0059629	0.366587	31	30	37	59	60	41
	ENSMUSG00000034639.7	Setmar	0.390949	2.19757	9.08421	0.00596682	0.366587	140	151	139	199	215	171
	ENSMUSG00000040663.9	Clcf1	-0.281949	3.27454	9.08211	0.00597178	0.366587	372	365	427	331	360	297
	ENSMUSG00000061175.11	Fnip2	-0.171056	5.7731	9.08084	0.00597479	0.366587	2047	1955	2380	1980	2101	1763
	ENSMUSG00000078998.3	Bpifa6	3.24226	-3.10603	9.08628	0.00596194	0.366587	1	0	0	4	5	4
	ENSMUSG00000020282.18	Rhbdf1	-0.161384	6.83922	9.04738	0.00605447	0.370528	4243	4152	4925	4144	4370	3763
	ENSMUSG00000021751.13	Acox2	0.278368	3.45414	9.04345	0.00606392	0.370528	335	370	378	460	491	408
	ENSMUSG00000113737.1	BB123696	0.61355	0.486522	9.04551	0.00605897	0.370528	43	32	42	67	64	54
	ENSMUSG00000031805.17	Jak3	0.24519	4.1614	9.02051	0.00611933	0.372962	615.88	523.09	661.16	828.12	763.67	613.95
	ENSMUSG00000060548.13	Tnfrsf19	-0.171804	5.88854	9.0186	0.00612395	0.372962	2234	2145	2531	2077	2257	1985
	ENSMUSG00000074282.10	Zfp94	0.503345	1.30178	9.02277	0.00611383	0.372962	68	78	73	106	102	112
	ENSMUSG00000038679.16	Trps1	-0.189403	6.71011	9.10891	0.00614603	0.373631	3927	3581	4821	3961	4077	3115
	ENSMUSG00000078866.10	Zfp970	0.38004	2.17255	9.00855	0.00614841	0.373631	131.3	135.49	159.36	191.69	215.66	165.65
	ENSMUSG00000038244.14	Mical2	-0.174001	5.87806	8.99206	0.00618881	0.375674	2130	2134	2610	2119	2190	1960
	ENSMUSG00000039457.4	Ppl	-0.199874	9.3975	9.38025	0.00620445	0.376211	25940	24955	28478	22864	23830	24258
	ENSMUSG00000000182.9	Fgf23	-0.993671	-0.828333	8.98137	0.00621513	0.376447	30	22	23	17	15	7
	ENSMUSG00000024516.13	Sec11c	-0.171329	6.04566	8.95717	0.0062752	0.377242	2538	2342	2827	2322	2467	2253
	ENSMUSG00000026380.10	Tfcp2l1	0.274948	3.45284	8.96954	0.00624442	0.377242	345	350	390	453	513	392.21
	ENSMUSG00000031373.4	Car5b	-0.235706	4.10802	8.96791	0.00624845	0.377242	622	672	754	649	621	527
	ENSMUSG00000032316.8	Clk3	-0.172484	6.61651	8.96286	0.006261	0.377242	3681.48	3539.57	4235.18	3474.57	3559.71	3413.02
	ENSMUSG00000037868.15	Egr2	-0.20943	4.82212	8.9582	0.00627263	0.377242	1022	1081	1233	983	1014	971
	ENSMUSG00000078995.10	Zfp456	0.68019	0.199294	8.96778	0.00624879	0.377242	24.31	32.37	35.61	60.14	50.32	42.6
	ENSMUSG00000079018.10	Ly6c1	0.167391	7.878	8.95688	0.0062759	0.377242	7610.19	7910.07	8872.46	10230.2	9916.07	8190.12
	ENSMUSG00000095325.3	Zfp870	0.345848	2.65173	8.95109	0.00629039	0.377703	203	202	197	290	260	242
	ENSMUSG00000020649.11	Rrm2	-0.242941	4.29063	8.94372	0.00630884	0.378401	680	750.96	904	671.9	695	660
	ENSMUSG00000050870.4	Mrgprb8	1.88509	-2.41459	8.92486	0.00635636	0.380839	1	3	2	9	9	6
	ENSMUSG00000035498.10	Cdcp1	-0.181709	6.14853	8.89756	0.00642587	0.383759	2753	2700	2823	2499	2566	2461
	ENSMUSG00000036103.9	Colec12	0.192128	6.96098	9.12555	0.00641333	0.383759	4107	4107	4579	5590	5528.05	4054
	ENSMUSG00000068073.2	1110025L11Rik	-0.466243	6.97786	16.5116	0.00642077	0.383759	4536.92	4983.23	6665.72	3886.12	4106.2	3986.26
	ENSMUSG00000003382.18	Etv3	-0.157999	7.47092	8.89038	0.00644428	0.384031	6747.45	6384.53	7473.03	6585.28	6529.29	5919.4
	ENSMUSG00000018449.12	Rpain	0.247541	3.85689	8.89211	0.00643984	0.384031	499	462	489	633	611	537
	ENSMUSG00000062825.15	Actg1	-0.168898	10.0403	8.88356	0.00646184	0.384663	37602.6	38771.1	46575.7	38138.1	38977.2	35385.8
	ENSMUSG00000046808.17	Atp10d	-0.198504	4.95598	8.88021	0.00647046	0.384764	1211	1201	1224	1112	1171	997
	ENSMUSG00000002617.14	Zfp40	0.402846	2.08019	8.87558	0.00648241	0.384806	139	133	122	180	195	165
	ENSMUSG00000037251.5	Pomk	0.32138	3.02889	8.86928	0.00649872	0.384806	267	253	272	380	379	269
	ENSMUSG00000040055.9	Gjb6	-0.266123	4.91812	9.94722	0.00648665	0.384806	1144	1180	1303	950	1062	1085
	ENSMUSG00000072294.5	Klf12	0.326708	3.08335	8.8692	0.00649895	0.384806	279	278	262	387	396	286
	ENSMUSG00000021417.15	Eci2	0.192492	5.48591	8.83532	0.00658744	0.385195	1496.36	1480.32	1618.4	1981.48	1979.7	1487.07
	ENSMUSG00000022035.6	Ccdc25	0.17949	5.57814	8.83212	0.00659587	0.385195	1681	1552	1686	2055	2022	1691
	ENSMUSG00000022419.16	Deptor	0.246544	7.20641	10.5775	0.00655965	0.385195	5238.28	4762.17	4810.54	6852.05	6288.01	5125.57
	ENSMUSG00000026327.8	Serpinb11	-0.218146	4.4997	8.85403	0.00653841	0.385195	906	828	937	781	810	774
	ENSMUSG00000035274.13	Tpbg	-0.231973	4.27182	8.83792	0.0065806	0.385195	691.93	772.37	825.46	693.64	678.19	638.75
	ENSMUSG00000041220.10	Elovl6	0.631203	9.59447	20.2943	0.00657856	0.385195	21911.9	24247.6	20078.7	39260.5	38052.6	29845.6
	ENSMUSG00000047875.6	Gpr157	-0.219343	5.74414	9.48081	0.00654823	0.385195	2144	1878	2330	1755	1942	1901
	ENSMUSG00000056116.18	H2-T22	0.367076	6.79066	13.769	0.00657348	0.385195	3742.58	3337.87	3531.76	5493.59	5016.58	3737.69
	ENSMUSG00000062944.4	9130023H24Rik	0.4018	2.20619	8.85912	0.00652513	0.385195	123.73	159.52	148.05	196.34	199.62	192.5
	ENSMUSG00000063236.6	1110038F14Rik	0.252915	3.97259	8.83367	0.00659178	0.385195	514	528	525	724	659	554
	ENSMUSG00000063506.14	Arhgap22	-0.392312	2.4404	8.85218	0.00654324	0.385195	178.2	236.63	257.86	178.05	202.48	149.32
	ENSMUSG00000066861.14	Oas1g	0.548007	3.2579	12.2124	0.00658826	0.385195	282.71	276.7	288.85	567.44	405.21	318.09
	ENSMUSG00000108282.1	Gm44317	-2.17522	-2.32817	9.05201	0.00655544	0.385195	14.58	7.75	4.35	0	2.85	2.98
	ENSMUSG00000032584.12	Mst1r	-0.162188	6.74251	8.82816	0.00660632	0.385399	4032	3795	4639	3921	3934	3608
	ENSMUSG00000027660.16	Skil	-0.182504	5.98245	8.82193	0.00662278	0.385953	2421	2195	2798	2360	2513	1878
	ENSMUSG00000109998.1	Gm45437	1.41679	-1.70729	8.8151	0.00664088	0.386601	2.1	5.81	7.05	16.39	9.82	15.38
	ENSMUSG00000022868.6	Ahsg	-1.01779	-0.910288	8.80062	0.00667944	0.386814	14	29	28	13	12	11
	ENSMUSG00000024799.16	Tm7sf2	-0.249625	3.82517	8.80741	0.00666134	0.386814	553.38	554.9	577.69	521.55	484.94	458.5
	ENSMUSG00000028086.15	Fbxw7	-0.181169	5.56705	8.80249	0.00667445	0.386814	1912	1646	1986	1690	1765	1583
	ENSMUSG00000074030.3	Exoc8	0.288871	3.47267	8.80556	0.00666626	0.386814	358	381	351	498	460	422
	ENSMUSG00000079104.4	Prps1l3	0.261213	3.59224	8.80109	0.0066782	0.386814	370.22	401.15	429.99	513.48	509.4	463.19
	ENSMUSG00000098708.7	Gm27252	0.867416	-0.466751	8.79455	0.0066957	0.387351	20	14	18	41	25	32
	ENSMUSG00000070407.5	Hs3st3b1	-0.216877	4.37209	8.78419	0.0067235	0.388149	793.22	761.72	891.4	762.57	713.6	691.17
	ENSMUSG00000070868.11	Skint3	-0.240573	4.43725	8.78522	0.00672073	0.388149	933	735	911	728	784	734
	ENSMUSG00000096039.8	D830030K20Rik	2.23855	-2.44696	8.78051	0.00673907	0.388643	0	2.6	2.07	8	13.72	2.71
	ENSMUSG00000028431.11	Elp1	0.184426	5.06188	8.76092	0.00678646	0.390969	1099	1117	1218	1424	1395	1214
	ENSMUSG00000053347.15	Zfp943	0.222459	4.41072	8.75048	0.00681489	0.392199	719	630	811.81	912	959	733
	ENSMUSG00000019082.18	Slc25a22	0.328809	6.47998	12.5649	0.00683692	0.393059	3034	2716	2939	4379	4008	2967
	ENSMUSG00000055407.14	Map6	-0.280391	4.97383	10.2161	0.00686618	0.394142	1154	1143	1507	1020	1072	1111
	ENSMUSG00000117183.1	Gm20008	0.379607	2.39508	8.7304	0.00686998	0.394142	175	167	154	214	231	222
	ENSMUSG00000108957.1	Gm45235	1.39539	-1.87659	8.72712	0.00687901	0.394252	4	4	5	15	12	9
	ENSMUSG00000025746.11	Il6	-1.00739	4.71531	22.829	0.00693944	0.396639	911	1365	1595	669	738	577
	ENSMUSG00000054823.16	Nsd3	0.227188	7.13547	9.91755	0.00695645	0.396639	4922	4371	4952	6597	6087	4631
	ENSMUSG00000057982.8	Zfp809	0.290628	3.20854	8.70043	0.0069531	0.396639	283	303	323	412	417	323
	ENSMUSG00000085028.2	Slc2a4rg-ps	0.478469	1.50559	8.70352	0.00694449	0.396639	77	95	83	118	146	105
	ENSMUSG00000112794.1	Gm48878	0.562397	1.16123	8.70543	0.00693916	0.396639	54	59	81	124	107	66
	ENSMUSG00000029561.17	Oasl2	0.740788	7.60748	21.9733	0.00697108	0.397065	5774	5094	5137	11257	9580	7079
	ENSMUSG00000049755.14	Zfp672	0.222272	4.41443	8.68131	0.00700671	0.39796	680	708	772	890.98	854	850
	ENSMUSG00000095253.4	Zfp799	0.296482	3.10009	8.68074	0.00700833	0.39796	260.4	270.87	311	381.79	347.94	336
	ENSMUSG00000105742.1	Gm42748	-0.580069	0.683928	8.68073	0.00700834	0.39796	66	71	68	57	45	40
	ENSMUSG00000053286.11	Trmt1l	0.248191	3.75478	8.67318	0.00702965	0.398762	450.97	426	475	595	598	470
	ENSMUSG00000050144.13	Slc25a44	0.191079	4.98186	8.67027	0.00703788	0.39882	1105	1023	1110	1366	1314	1144
	ENSMUSG00000024232.2	Bambi	0.212903	4.59109	8.66435	0.00705465	0.399166	752	808	892	1063	1048	831
	ENSMUSG00000026433.13	Rab29	0.289305	3.21085	8.66263	0.00705952	0.399166	281	305	325	407	419	327
	ENSMUSG00000071302.10	2610044O15Rik8	0.290428	3.19929	8.6605	0.00706559	0.399166	307	285	311	376	431	336
	ENSMUSG00000111394.1	Gm49759	-0.168433	7.01389	8.65011	0.00709516	0.400429	5151	4352.17	5582.22	4885.12	4784.92	4161.42
	ENSMUSG00000053560.5	Ier2	-0.239238	6.1302	10.0596	0.00712708	0.401821	2464	2670	3230	2289	2574	2408
	ENSMUSG00000110277.2	Gm45871	0.414751	2.05624	8.62183	0.00717642	0.404191	120	139	127	160	195	176.63
	ENSMUSG00000025220.8	Oga	-0.159662	7.87376	8.60371	0.00722901	0.406664	9055.84	8399.36	9796.57	8504.32	8647.11	7977.56
	ENSMUSG00000030259.12	Rassf8	-0.24086	4.69374	8.9165	0.007235	0.406664	989	916	1185	897	1072	734
	ENSMUSG00000029480.13	Dhx37	0.237021	3.90453	8.59414	0.00725693	0.407484	469	482	558	637	618	577
	ENSMUSG00000025372.16	Baiap2	-0.175526	6.25484	8.58542	0.00728251	0.407767	2762	2879	3275	2642	2839	2642
	ENSMUSG00000026819.15	Slc25a25	-0.399562	5.59619	13.5229	0.00728374	0.407767	2032.58	1612.92	2444.92	1505.09	1819.22	1417.24
	ENSMUSG00000033739.8	Fkbpl	0.350099	2.35695	8.5849	0.00728405	0.407767	166	153	171	218	238	190
	ENSMUSG00000071713.6	Csf2rb	0.193461	5.61447	8.58164	0.00729363	0.407891	1677.94	1425.38	1942.8	2100.53	2174.02	1677.71
	ENSMUSG00000046844.6	Vat1l	0.434708	1.95653	8.57598	0.00731031	0.408037	133	98	127	194	183	125
	ENSMUSG00000079481.11	Nhsl2	0.277531	4.11817	8.94924	0.00731097	0.408037	581	527	615	816	811	543
	ENSMUSG00000034041.5	Lyl1	-0.614288	0.684086	8.57246	0.00732069	0.408169	57.41	74.4	75.31	52.08	57.28	31.16
	ENSMUSG00000053436.15	Mapk14	-0.17444	7.10582	8.56224	0.00735096	0.409303	5349	4859	5885	4800	4992	4855
	ENSMUSG00000062040.14	Zfp27	0.406311	2.12304	8.56061	0.0073558	0.409303	139	131	136	207	215	138
	ENSMUSG00000025092.7	Hspa12a	0.180065	6.02732	8.55386	0.00737588	0.410009	2370	2099	2242	2711	2683	2463
	ENSMUSG00000033458.17	Fan1	0.326695	2.85402	8.55066	0.0073854	0.410126	233	241	224	301	327	279
	ENSMUSG00000020740.13	Gga3	0.205759	4.74733	8.53991	0.00741754	0.410677	824.29	907.21	1009.84	1083.56	1189.9	990.17
	ENSMUSG00000022123.9	Scel	-0.177047	6.06164	8.54286	0.00740871	0.410677	2534	2420	2850	2316	2418	2359
	ENSMUSG00000022453.8	Naga	0.165841	5.77878	8.54182	0.00741184	0.410677	1800	1767	2134	2328	2308	1961
	ENSMUSG00000040651.9	Tasor	0.230856	5.08731	9.03905	0.0074396	0.411077	1192.54	1052.7	1190.08	1620.49	1433.53	1128.94
	ENSMUSG00000048807.2	Slc35e4	-0.183845	5.63333	8.53425	0.00743454	0.411077	1904	1688	2234	1772	1803	1690
	ENSMUSG00000048191.15	Muc6	-0.855001	-0.549968	8.52622	0.00745872	0.411723	28	22	40	20	18	13
	ENSMUSG00000003032.8	Klf4	-0.176854	9.60227	8.52076	0.0074752	0.411729	29178	27202	34693	26932	28521	27176
	ENSMUSG00000037266.18	Rsrp1	0.173261	9.12521	8.51635	0.00748855	0.411729	19673	18576	19377	24603	22983	19770
	ENSMUSG00000111673.1	Gm29724	-0.701322	0.0805161	8.52173	0.00747227	0.411729	38.8	36.99	62.21	26.22	31.92	28.62
	ENSMUSG00000114138.1	Gm36423	-1.29915	-1.46375	8.51703	0.00748649	0.411729	17.64	9.89	21.48	8.62	2.85	8.64
	ENSMUSG00000021118.7	Plek2	-0.211216	4.70056	8.51301	0.00749865	0.411876	993	968	1105	925	886	912
	ENSMUSG00000030849.18	Fgfr2	-0.169736	7.47169	8.50146	0.0075338	0.411876	6658.95	6552.95	7474.08	6104.25	6641.44	6177.82
	ENSMUSG00000031425.15	Plp1	0.26903	3.87933	8.50356	0.00752738	0.411876	520	421	524	711	615	501
	ENSMUSG00000080875.4	Gm7332	-0.184417	5.312	8.5008	0.00753581	0.411876	1440.52	1558.92	1640.86	1466.41	1446.1	1305.43
	ENSMUSG00000105891.4	A230001M10Rik	2.65618	-2.94846	8.50836	0.00751277	0.411876	0	1	1	6	4	5
	ENSMUSG00000110141.1	Gm45684	1.76448	-2.19302	8.50712	0.00751655	0.411876	3	1	4	16	7	6
	ENSMUSG00000063888.7	Rpl7l1	0.178234	5.68853	8.49225	0.00756191	0.412895	1769.97	1755	1780.99	2150	2146.98	1914.98
	ENSMUSG00000084817.3	Gm5526	-0.237642	3.83257	8.47995	0.00759967	0.414549	533.29	551.78	605.61	510.93	533.99	437.58
	ENSMUSG00000026840.14	Lamc3	0.245838	4.57895	8.79558	0.00761068	0.414741	694.48	784.41	927.8	985.37	1140.14	824.55
	ENSMUSG00000037784.14	Dzip1l	-0.220205	4.31142	8.44817	0.00769821	0.418426	715	785	845	718	709	650
	ENSMUSG00000073427.4	Gm4924	0.625569	0.345233	8.45007	0.00769228	0.418426	32	33	40	60	66	42
	ENSMUSG00000097820.3	E530011L22Rik	-0.500818	1.05645	8.44729	0.00770095	0.418426	85.78	75.94	100.69	60.54	73.99	56.5
	ENSMUSG00000044534.8	Ackr2	0.195233	5.02309	8.43928	0.007726	0.419225	1030	1056	1251	1458	1383	1109
	ENSMUSG00000047878.13	A4galt	0.204373	4.744	8.43776	0.00773078	0.419225	843	908	983	1096	1102	1048
	ENSMUSG00000025557.10	Slc15a1	-0.209304	5.07125	8.45874	0.00781771	0.423261	1310	1222	1433	1108	1210	1204
	ENSMUSG00000036292.14	Gramd1c	-0.273655	5.56603	10.2901	0.00782049	0.423261	1873	1680	2165	1581	1557	1701
	ENSMUSG00000023979.14	Guca1b	-0.849526	-0.578261	8.40409	0.00783719	0.423751	24	24	40	17	19	14
	ENSMUSG00000045730.4	Adrb2	-0.294113	5.48823	10.6898	0.00785726	0.424422	1597	1711	2148	1471	1515	1568
	ENSMUSG00000023968.15	Crip3	-0.704197	0.24081	8.39497	0.00786628	0.424496	42	49	64	26	30	41
	ENSMUSG00000047583.9	Tyw3	0.393272	2.34514	8.39235	0.00787465	0.424534	143.04	183.34	149.41	210.95	230.82	205.92
	ENSMUSG00000028035.13	Dnajb4	-0.163934	5.7833	8.3866	0.00789308	0.424701	2092	1941	2379	2009	2059	1826
	ENSMUSG00000050855.16	Zfp940	0.66711	0.335578	8.38694	0.007892	0.424701	37	34	31	71	60	38
	ENSMUSG00000046573.7	Lyrm4	-0.347545	2.43768	8.38123	0.00791035	0.425218	205	207	251	171.45	186	178
	ENSMUSG00000023008.18	Fmnl3	-0.244963	4.00862	8.37641	0.00792585	0.425638	592	584	746	562	641	471
	ENSMUSG00000026788.13	Zbtb43	-0.179782	5.96071	8.36901	0.00794975	0.425747	2459	2217	2603	2105	2341	2166
	ENSMUSG00000038002.9	Cramp1l	-0.16119	5.86228	8.37325	0.00793607	0.425747	2247	2081	2430	2149	2153	1930
	ENSMUSG00000118257.1	9630014M24Rik	-4.5077	-3.48378	8.50461	0.00795093	0.425747	3	3	2	0	0	0
	ENSMUSG00000020227.10	Irak3	0.167947	6.19246	8.36125	0.00797489	0.426206	2514	2365	2697	3248.98	3080	2485
	ENSMUSG00000037573.5	Tob1	-0.262312	6.40931	10.4254	0.00796807	0.426206	3206	3018	4018	2821	2909	3001
	ENSMUSG00000052137.11	Rbm12b2	0.305062	2.98048	8.34531	0.00802681	0.428568	265.5	237.87	267.69	350.21	366.35	270.98
	ENSMUSG00000039556.16	Ppp1r3f	-0.554755	0.990432	8.33757	0.00805216	0.429508	83.43	71.93	99.27	48.05	60.1	68.99
	ENSMUSG00000017311.15	Pyy	0.516615	1.17646	8.33193	0.00807066	0.430081	72	54	74	82	111	101
	ENSMUSG00000070814.15	Zswim9	0.316946	2.68459	8.32883	0.00808086	0.430211	207	201	216	287	278	239
	ENSMUSG00000026235.14	Epha4	-0.212385	4.48043	8.3209	0.00810703	0.43119	804	861	968	782	804	754
	ENSMUSG00000078763.2	Slfn1	0.303911	3.62814	8.6041	0.00812179	0.43156	426	397	385	608	531	413
	ENSMUSG00000056215.13	Lrguk	1.50347	-2.00033	8.31032	0.0081421	0.432225	2	4	5	15	11	7
	ENSMUSG00000031089.7	Slc6a14	-0.229418	4.53662	8.30524	0.00817193	0.43298	890	827	1041	765	814	832
	ENSMUSG00000053046.16	Brsk2	1.15497	-1.17914	8.30276	0.00816721	0.43298	12	8	6	27	24	10
	ENSMUSG00000027699.19	Ect2	-0.271353	3.48191	8.27636	0.00825571	0.435752	397	430	515	368	413	363
	ENSMUSG00000042540.12	Acot5	-0.410651	2.25617	8.30655	0.00825382	0.435752	163.4	191.02	241.43	172.78	178.81	112.27
	ENSMUSG00000045045.7	Lrfn4	-0.225073	4.24061	8.28044	0.00824194	0.435752	679	691	874	703	657	614
	ENSMUSG00000072774.10	Zfp951	0.410528	1.71084	8.28289	0.0082337	0.435752	98	96	110	143	156	119
	ENSMUSG00000028236.3	Sdr16c5	-0.180795	6.32205	8.30689	0.00827044	0.436114	3123	2963	3256	2831	2798	2851
	ENSMUSG00000027315.13	Spint1	-0.22731	6.01791	9.35388	0.00832685	0.438671	2427	2406	2866	2244	2157	2339
	ENSMUSG00000006403.13	Adamts4	-0.240911	4.06183	8.24492	0.00836245	0.439038	617	589	787.75	637	619	484
	ENSMUSG00000028587.18	Orc1	-0.409638	1.81195	8.24402	0.0083655	0.439038	131.93	151.37	151	109.68	118.92	108.88
	ENSMUSG00000046721.11	Rpl14-ps1	0.174512	7.46976	8.24448	0.00836394	0.439038	5504.26	5604.48	7300.6	7258.25	7457.73	6621.55
	ENSMUSG00000071265.10	1700086L19Rik	1.24666	-1.44924	8.24855	0.00835003	0.439038	6	10	4	23	15	12
	ENSMUSG00000015766.14	Eps8	0.208744	4.67476	8.23917	0.00838213	0.439185	835	751	1028	1127	1065	917
	ENSMUSG00000025784.5	Clec3b	0.159728	7.74001	8.23858	0.00838415	0.439185	6877	6970	8427	8964	9221	7494
	ENSMUSG00000026796.16	Fam129b	-0.168468	8.18869	8.23162	0.00840803	0.44002	10726	10695	12608	10252	10608	10247
	ENSMUSG00000022863.15	Btg3	-0.213631	4.37532	8.22506	0.00843065	0.440372	845.71	772.25	825.02	734.31	773.41	670.47
	ENSMUSG00000102562.1	Gm37694	1.17989	-1.4329	8.22541	0.00842945	0.440372	9	6	6	21	19	10
	ENSMUSG00000031539.6	Ap3m2	0.229628	3.96364	8.2157	0.00846302	0.440817	505	483	590	697	667	547
	ENSMUSG00000072941.5	Sod3	0.226165	6.87097	9.44206	0.00845521	0.440817	3367	3774	4781	4880	5105	4353
	ENSMUSG00000115148.1	Gm49125	1.83337	-2.28326	8.21885	0.00845209	0.440817	1	5	1	9	12	6
	ENSMUSG00000052688.12	Rab7b	-0.220614	4.86119	8.36676	0.0084726	0.440902	1028	1140	1271	975	1034	1024
	ENSMUSG00000021756.12	Il6st	0.172344	8.97002	8.19336	0.00854079	0.443305	17733	15577	18628	22638	20909	17029
	ENSMUSG00000071203.6	Naip5	0.33003	2.55974	8.19278	0.00854279	0.443305	177.21	193.16	198.34	262.54	264.58	213.33
	ENSMUSG00000100417.2	Gm28578	-1.77938	-2.37918	8.19649	0.00852984	0.443305	11	7	6	3	3	1
	ENSMUSG00000045107.5	Saysd1	0.263922	3.31149	8.18524	0.00856924	0.444262	330	302	356	420	439	366
	ENSMUSG00000004263.15	Atn1	-0.16761	6.58537	8.17099	0.00861945	0.446447	3391.5	3505	4312.58	3470.02	3554.44	3234.36
	ENSMUSG00000052557.11	Gan	-0.161626	7.81942	8.16839	0.00862864	0.446506	8531	8432	9266	7956	8442	7772
	ENSMUSG00000016206.6	H2-M3	0.262002	3.40356	8.16286	0.00864823	0.447102	340	341	372	479	444	383
	ENSMUSG00000029920.9	Smarcad1	0.197349	4.60434	8.15595	0.00867279	0.447954	832	786	869	999	1080	871
	ENSMUSG00000002625.10	Akap8l	0.174356	5.54898	8.15229	0.00868582	0.44821	1642	1507	1684	2061	1954	1631
	ENSMUSG00000016253.12	Nelfcd	0.195933	4.58226	8.14192	0.00872288	0.448956	822	747	885	978	1053	871
	ENSMUSG00000040272.14	Accs	0.321335	2.6447	8.13918	0.00873269	0.448956	188	202	216	278	283	223
	ENSMUSG00000054931.7	Zkscan4	0.672067	0.233918	8.14451	0.0087136	0.448956	24.25	39.88	30.65	52.45	51.08	52.72
	ENSMUSG00000067714.13	Lpar5	-0.276213	3.58932	8.13931	0.00873223	0.448956	430	435	587	390	436	403
	ENSMUSG00000045691.14	Thtpa	0.23963	3.67343	8.13569	0.00874523	0.449184	412.29	394	478.06	540.53	537.25	484.34
	ENSMUSG00000114822.1	Gm4813	0.879803	-0.77319	8.13262	0.00875625	0.449333	10	15	16	25	27	26
	ENSMUSG00000039117.16	Taf4	-0.184156	5.02615	8.12587	0.00878058	0.449691	1191	1230	1390	1137	1261	1063
	ENSMUSG00000071757.10	Zhx2	0.181638	4.91731	8.12771	0.00877394	0.449691	1047	962	1102	1285	1250	1108
	ENSMUSG00000098176.2	Ccdc166	0.394974	2.10871	8.12393	0.00878756	0.449691	117	148	139	185	179	184
	ENSMUSG00000048489.12	Depp1	0.368003	4.72388	11.0708	0.0088162	0.450741	851	857	816	1340	1173	882
	ENSMUSG00000019960.8	Dusp6	-0.321721	5.60469	11.1105	0.00884926	0.451598	1759	1694	2539	1685	1759	1471
	ENSMUSG00000021288.19	Klc1	-0.168118	7.13872	8.10757	0.00884683	0.451598	5216	5087	6135	4798	5393	4850
	ENSMUSG00000038855.10	Itpkb	-0.167677	6.26444	8.10293	0.00886375	0.451921	2817	2755	3397	2652	3003	2562
	ENSMUSG00000089756.2	Zfp966	0.532294	1.81247	8.7807	0.00889515	0.452802	122.39	101.28	85.17	182.14	174.22	110.75
	ENSMUSG00000104453.1	Gm37829	0.398362	2.26296	8.09372	0.00889738	0.452802	161.52	110.74	180.06	225.85	225.44	163.71
	ENSMUSG00000078144.4	Capns2	-0.174332	6.06501	8.0791	0.00895106	0.455116	2464	2603	2729	2335	2473	2316
	ENSMUSG00000029633.9	Gm5578	0.344155	2.31614	8.06564	0.00900081	0.456365	166.03	141.97	169.81	212.69	215.81	196.83
	ENSMUSG00000060441.15	Trim5	0.414396	1.74379	8.06863	0.00898973	0.456365	109.29	84.3	117.77	144.59	158.56	124.83
	ENSMUSG00000061544.13	Zfp229	0.393233	1.81742	8.06355	0.00900856	0.456365	114	99	117	154	163	131
	ENSMUSG00000091764.3	Zfp964	0.571209	0.805466	8.06604	0.00899932	0.456365	36	51	63	90.14	77	63
	ENSMUSG00000022244.7	Amacr	0.273674	3.13399	8.05598	0.00903669	0.456955	286	267	317	374	381	330
	ENSMUSG00000108621.1	Gm37494	0.298438	4.42919	9.27871	0.00903636	0.456955	725	730	655	990	986	729
	ENSMUSG00000044795.12	Cyb5d1	0.377388	2.40129	8.05296	0.00904794	0.457106	161.21	183.76	153.1	220.56	222.82	225.77
	ENSMUSG00000035208.16	Slfn8	0.626733	5.91696	17.6747	0.00909167	0.458642	1915.52	1667.71	1614.73	3294.86	2870.45	2205.08
	ENSMUSG00000074506.4	Gm10705	-0.243118	3.59698	8.04041	0.00909487	0.458642	474.53	453.81	509.29	427.75	433.46	391.95
	ENSMUSG00000029541.12	Cyp2w1	-0.436874	1.482	8.03433	0.0091177	0.459128	111	107	130	88	85	91
	ENSMUSG00000029684.14	Wasl	-0.156837	6.3394	8.02683	0.00914594	0.459128	3070	2814	3530	2936	3123	2640
	ENSMUSG00000061080.11	Lsamp	0.324143	3.51993	8.55281	0.00913662	0.459128	363	358	394	559	546	348
	ENSMUSG00000076934.2	Iglv1	-1.17367	-1.23728	8.02878	0.00913858	0.459128	18	16	23	7	16	3
	ENSMUSG00000097194.2	9330175E14Rik	0.288032	3.39568	8.028	0.00914154	0.459128	377	329	328	470	478	364
	ENSMUSG00000026090.16	2010300C02Rik	-0.201136	5.40245	8.19262	0.00916913	0.459875	1575	1513	1899	1425	1508	1513
	ENSMUSG00000062960.10	Kdr	-0.33787	2.81557	8.01557	0.00918854	0.460432	280	230	354	250	263	191
	ENSMUSG00000006360.11	Crip1	-0.181973	7.39393	8.21402	0.00920375	0.4606	5878	6298	7544	6068	6785	5106
	ENSMUSG00000113204.1	Gm46430	0.351056	2.65739	8.01031	0.00920851	0.4606	169.17	225.84	208.21	266.61	292.32	238.22
	ENSMUSG00000068014.5	Gm14648	-0.459353	1.7257	8.00651	0.00922297	0.460907	141.24	100.39	176.31	96.28	108.48	105.77
	ENSMUSG00000091183.5	Gm5141	0.696937	-0.0773929	7.99927	0.00925057	0.46187	25	23	27	39	39	47
	ENSMUSG00000018143.10	Mafk	-0.164398	6.47121	7.97829	0.00933109	0.464644	3337.21	3101.09	3905.15	3450.51	3396.27	2686.29
	ENSMUSG00000018427.8	Ypel2	-0.183274	5.3089	7.97824	0.00933127	0.464644	1637	1390	1605	1419	1464	1325
	ENSMUSG00000035596.14	Mboat7	0.161978	5.97021	7.9802	0.00932375	0.464644	2028	2158.72	2315.74	2616.98	2627.39	2274.69
	ENSMUSG00000021265.3	Slc25a29	-0.271213	3.57411	7.97582	0.00934064	0.464693	477	396	561	393	423	402
	ENSMUSG00000011463.5	Cpb1	-3.27479	-1.99512	10.9229	0.00936336	0.464988	4	29	7	1	2	1
	ENSMUSG00000074874.10	Ctla2b	0.495024	2.1585	8.81507	0.00935541	0.464988	131.29	122.44	149.16	267.35	164.29	155.98
	ENSMUSG00000111818.1	Gm17749	-1.25745	-1.69802	7.96723	0.00937387	0.465093	11	11	18	8	5	4
	ENSMUSG00000026655.15	Fam107b	-0.194797	5.38319	7.99584	0.00942678	0.466883	1523	1475	1918	1402	1559	1444
	ENSMUSG00000110114.1	Gm45471	3.13495	-3.16214	7.95519	0.00942063	0.466883	0	1	0	4	3	5
	ENSMUSG00000027187.10	Cat	0.154317	6.26223	7.943	0.0094683	0.46852	2502	2557	2939	3246	3212	2733
	ENSMUSG00000010086.17	Rnf112	0.77888	-0.390367	7.93503	0.00949957	0.468597	19	20	18	37	41	24
	ENSMUSG00000030029.14	Lrig1	-0.17269	5.78915	7.93399	0.00950367	0.468597	2136	1968	2347.77	2186.76	2095.79	1642
	ENSMUSG00000061981.14	Flot2	0.16219	6.35687	7.93408	0.00950332	0.468597	2784	2659	3070	3595	3510	2759
	ENSMUSG00000086804.8	Gm43154	2.31361	-2.5601	8.0122	0.00949226	0.468597	0	0	4	8	10	4
	ENSMUSG00000036438.14	Calm2	-0.158148	7.98917	7.91999	0.00955892	0.469124	9542.5	8744.1	11306.6	9716.11	9615.75	8001.49
	ENSMUSG00000050141.13	Fam205c	1.01206	-1.09114	7.91763	0.00956827	0.469124	10	13	7	18	23	22
	ENSMUSG00000062783.2	Csprs	0.871312	-0.326851	7.9923	0.00957002	0.469124	16.31	22.34	18.65	56.21	29.64	23.6
	ENSMUSG00000074591.8	Ankub1	4.45686	-3.48462	8.04277	0.00956006	0.469124	0	0	0	2	4	2
	ENSMUSG00000085156.8	Snhg15	-0.181204	5.07385	7.92326	0.00954601	0.469124	1362.97	1159	1416	1230	1246	1104.31
	ENSMUSG00000089728.3	Clec2f	-0.926521	-0.726883	7.91628	0.00957362	0.469124	28	24	28	8	16	19
	ENSMUSG00000115925.1	Gm33432	0.461864	1.67776	7.9206	0.00955652	0.469124	102	109	78	143	144	127
	ENSMUSG00000028405.9	Aco1	0.158413	5.98032	7.91184	0.00959128	0.46917	2095	2134	2329	2658	2702	2214
	ENSMUSG00000030386.18	Zfp606	0.328334	2.62072	7.91179	0.00959148	0.46917	190	196	208	274	293	207
	ENSMUSG00000034390.16	Cmip	-0.166593	5.71195	7.90791	0.0096069	0.46947	1910	1904	2294	1870	1949	1779
	ENSMUSG00000054905.2	Stfa3	-0.204366	4.38653	7.90599	0.00961455	0.46947	786	761	916	772	731	697
	ENSMUSG00000025956.10	Mettl21a	0.256291	3.43396	7.90099	0.0096345	0.470029	363	346	368	467	449	413
	ENSMUSG00000015947.10	Fcgr1	0.521837	4.47363	13.1526	0.00964554	0.470092	654	695	645	1240	929	810
	ENSMUSG00000071356.7	Reg3b	-4.80406	-3.34687	8.37779	0.00965275	0.470092	0	4	6	0	0	0
	ENSMUSG00000029632.7	Ndufa4	-0.156008	6.95661	7.89328	0.00966535	0.470293	4960	4444	4988	4685	4677	3995
	ENSMUSG00000021716.14	Srek1ip1	0.244188	3.5927	7.88462	0.00970013	0.47066	393.71	397.13	417.63	514.86	508	456.27
	ENSMUSG00000022521.10	Crebbp	-0.154235	6.62445	7.88842	0.00968485	0.47066	3845	3403	4206	3702	3655	3248
	ENSMUSG00000024677.13	Ms4a6b	0.207846	4.69572	7.88295	0.00970688	0.47066	846.92	837	959	1218	1063	878.9
	ENSMUSG00000069583.2	Krtap12-1	-1.12837	0.165201	10.1078	0.0097006	0.47066	31	73	58	19	24	33
	ENSMUSG00000023224.12	Serping1	0.165525	9.34967	7.87784	0.00972747	0.471247	20748	21046	26103	28410	27747	22439
	ENSMUSG00000046351.11	Zfp322a	0.269171	3.5984	7.87437	0.00974149	0.471513	401	419	378	499	537	461
	ENSMUSG00000017412.15	Cacnb4	0.429928	1.51845	7.87008	0.00975883	0.471941	78.23	85.2	100.07	135.25	133.01	99.09
	ENSMUSG00000023021.15	Cers5	0.15129	7.15829	7.86461	0.00978102	0.472602	4916	4768	5193	5827	6101	5156
	ENSMUSG00000029369.17	Afm	-1.01928	-0.981886	7.86134	0.00979433	0.472832	23	28	16	10	9	15
	ENSMUSG00000028532.14	Cachd1	-0.174392	5.4108	7.84936	0.0098432	0.474778	1653	1450	1870	1566	1539	1426
	ENSMUSG00000026080.13	Chst10	-0.869062	-0.828789	7.84681	0.00985363	0.474868	24	20	29	12	17	12
	ENSMUSG00000021822.3	Plau	-0.399853	4.33328	10.7187	0.00989276	0.476339	694	860	968	586	712	665
	ENSMUSG00000067212.8	H2-T23	0.263518	7.35744	10.0077	0.00990436	0.476484	5613	5221.79	5529.92	7967.87	6951.84	5502.69
	ENSMUSG00000022687.12	Boc	0.154745	6.90389	7.82764	0.00993245	0.477277	4070	3938	4461	5216	5031	4119
	ENSMUSG00000072915.3	Gm12258	0.467393	1.44598	7.82629	0.00993807	0.477277	67.62	96.69	81.37	125.36	117.49	109
	ENSMUSG00000032656.14	2003-03-01	-0.220756	4.25698	7.81953	0.00996603	0.477792	718	730	811	627	721	649
	ENSMUSG00000035493.10	Tgfbi	0.153937	8.8333	7.81968	0.00996542	0.477792	14810	14730	18108	18759	19006	16799
	ENSMUSG00000026107.11	Nabp1	0.270351	3.58383	7.81216	0.00999666	0.478846	341	425	423	510	540	435
	ENSMUSG00000018363.16	Smurf2	-0.15993	5.76667	7.80278	0.0100358	0.479063	2050	1923	2358	2082	2061	1706
	ENSMUSG00000027883.15	Gpsm2	-0.222689	5.84293	8.747	0.0100281	0.479063	2108.41	2168.09	2530.28	1901.15	2007.73	2072.56
	ENSMUSG00000115754.1	Gm48972	1.08783	-1.08978	7.80839	0.0100123	0.479063	12	12	5	17	20	27
	ENSMUSG00000117679.1	Apbb3	0.240114	3.92839	7.80373	0.0100318	0.479063	510.76	502.42	514.38	680.38	681.55	512
	ENSMUSG00000040812.14	Agbl2	0.832508	-0.559969	7.79524	0.0100673	0.480155	21	14	14	34	35	22
	ENSMUSG00000022387.17	Brd1	-0.155033	7.0203	7.79148	0.0100831	0.480494	4876	4585	5619	4648	4837	4442
	ENSMUSG00000032315.6	Cyp1a1	-0.508675	3.84735	11.5663	0.0101072	0.480843	585	534	745	545	497	315
	ENSMUSG00000047250.13	Ptgs1	-0.192955	6.73118	8.25592	0.0101164	0.480843	4062.88	3769.8	4662.67	3525.79	3880.85	3801.9
	ENSMUSG00000076564.2	Igkv12-46	-1.62919	-2.19197	7.78532	0.010109	0.480843	10	4	14	2	4	3
	ENSMUSG00000042812.5	Foxf1	0.396005	1.95598	7.7806	0.0101289	0.481022	117	117.02	129	195	176	125
	ENSMUSG00000010760.5	Phlda2	-0.710271	-0.137836	7.77518	0.0101518	0.481286	34	47	36	26	25	23
	ENSMUSG00000039242.10	B3galnt2	0.179721	4.99618	7.77604	0.0101481	0.481286	1122.31	1023.81	1139.71	1326.38	1311.3	1203.45
	ENSMUSG00000050022.16	Amz1	-0.501246	1.12905	7.76043	0.0102144	0.48384	90.3	81	104.87	59.93	88.25	53.43
	ENSMUSG00000010651.4	Acaa1b	0.584661	0.818831	7.75516	0.0102369	0.484491	55.98	51.36	42.06	98.19	82.39	53.56
	ENSMUSG00000031897.9	Psmb10	0.460383	5.4165	13.3406	0.0102465	0.484534	1408	1226	1309	2243	1969	1438
	ENSMUSG00000038201.10	Kcna7	0.522403	2.12328	8.84014	0.0102633	0.484911	149	96	144	231	217	132
	ENSMUSG00000031134.16	Rbmx	0.19034	5.04086	7.74185	0.0102939	0.485944	1100	1132	1138	1408	1311	1255
	ENSMUSG00000018648.15	Dusp14	-0.252705	6.7983	9.60618	0.0103213	0.485994	4121	4099	5136	3570	3958	3948
	ENSMUSG00000030166.14	Rad52	0.265565	3.45523	7.73903	0.010306	0.485994	348	373	367	506	458	392
	ENSMUSG00000035666.14	Gtf3c4	0.185436	4.98503	7.73595	0.0103193	0.485994	1079	1063	1108	1394	1334	1103
	ENSMUSG00000005054.7	Cstb	-0.162951	6.49475	7.72598	0.0103623	0.487512	3391	3280	3817	3100	3403	3135
	ENSMUSG00000049288.4	Lix1l	0.158117	5.90992	7.72191	0.01038	0.487529	2081	1933	2238	2597	2540	2079
	ENSMUSG00000107350.1	Gm19610	-1.15378	-1.47929	7.72184	0.0103803	0.487529	9.34	15.86	21.65	7.62	7.37	6.44
	ENSMUSG00000022433.19	Csnk1e	-0.185474	6.15858	7.97738	0.0104016	0.488119	2582.77	2569.75	3235.7	2503.78	2518.8	2536.71
	ENSMUSG00000020164.7	Kcnmb4os1	-2.34744	-2.8016	7.71075	0.0104285	0.488645	2.41	5.65	8.92	1.62	1.51	0
	ENSMUSG00000047821.16	Trim16	-0.216018	5.37749	8.25226	0.0104305	0.488645	1542.37	1412.6	1983.48	1425.86	1489	1436.65
	ENSMUSG00000017667.9	Zfp334	0.416111	1.9006	7.70566	0.0104507	0.489177	97	115	135	186	175	119
	ENSMUSG00000031214.13	Ophn1	0.186602	4.7724	7.70116	0.0104704	0.489686	942	871	995	1124	1222	960
	ENSMUSG00000093805.7	Gal3st2b	-1.12389	-1.22866	7.69613	0.0104924	0.49018	14.68	17.91	24.26	15.23	4.22	7.2
	ENSMUSG00000117505.1	Gm9993	0.864254	-0.770552	7.69471	0.0104986	0.49018	13.49	14.13	13.77	22.92	24.47	30.33
	ENSMUSG00000019368.13	Sec14l4	0.155104	6.52007	7.68809	0.0105277	0.490596	2993	3149	3405	3891	3860	3246
	ENSMUSG00000030094.8	Xpc	-0.201329	4.88344	7.69039	0.0105176	0.490596	1065	1082	1331	1014	1047	1042
	ENSMUSG00000058248.12	Kcnh1	0.300591	5.22729	9.85882	0.0105341	0.490596	1110	1304	1265	1588	1495	1586
	ENSMUSG00000118504.1	AC163616.1	0.280965	3.25289	7.67932	0.0105664	0.491688	295.27	285.25	363.69	393.55	463.03	328.68
	ENSMUSG00000004347.17	Pde1c	0.381874	1.92528	7.67454	0.0105876	0.491883	112	114	132	149	171	160
	ENSMUSG00000009575.14	Cbx5	0.160629	6.04552	7.67437	0.0105883	0.491883	2283	2165	2408	2861	2839	2241
	ENSMUSG00000034118.15	Tpst1	0.206657	4.62229	7.6688	0.0106131	0.492498	783	830	897	1131	1038	833
	ENSMUSG00000073643.11	Wdfy1	0.202086	4.36197	7.66739	0.0106193	0.492498	713	654	731	875	899	724
	ENSMUSG00000099875.1	Rbm3-ps	-0.185441	4.64987	7.6642	0.0106335	0.492742	936.73	938.95	1059.66	931.87	949.15	786.71
	ENSMUSG00000037355.14	Uvssa	0.171567	5.42524	7.65337	0.0106819	0.494156	1434	1470	1531	1800	1871	1505
	ENSMUSG00000045664.5	Cdc42ep2	0.391868	2.38049	7.77352	0.0106785	0.494156	183	120	189	242	251	174
	ENSMUSG00000026664.7	Phyh	0.225377	4.70267	7.88715	0.0106977	0.494474	946	760	933	1203	1124	869
	ENSMUSG00000024076.10	Vit	0.191907	5.47533	7.74454	0.0107484	0.496405	1400	1493	1675	1945	2013	1453
	ENSMUSG00000096621.2	Gm5849	-0.740344	-0.313064	7.63654	0.0107574	0.49641	38	29	37	17	26	21
	ENSMUSG00000075271.4	Ttc30a1	0.623207	1.23588	8.4102	0.0107813	0.497096	57.9	88.64	51.03	100.54	110.48	105.33
	ENSMUSG00000028370.7	Pappa	0.277582	4.0843	8.14988	0.0108444	0.499174	551	548	581	850	722	545
	ENSMUSG00000032712.16	Resf1	0.183935	6.18179	7.86769	0.0108419	0.499174	2583	2315	2570	3282	3131	2394
	ENSMUSG00000021313.16	Ryr2	1.19646	-1.3644	7.6114	0.0108715	0.499521	13	5	4	22	19	12
	ENSMUSG00000059475.13	Zfp426	0.265206	4.01333	7.87213	0.0108789	0.499521	537	568	495	687	665	640
	ENSMUSG00000114452.1	A530001N23Rik	0.937269	-0.863271	7.61183	0.0108695	0.499521	12	17	8	29	23	22
	ENSMUSG00000055228.8	Zfp935	-5.04012	-3.23254	8.73189	0.0108906	0.499641	7.8	0	4.01	0	0	0
	ENSMUSG00000004500.9	Zfp324	0.40339	2.75559	8.23858	0.0109496	0.500285	226	227	177	330	307	233
	ENSMUSG00000024500.19	Ppp2r2b	-0.6847	-0.0788799	7.59698	0.0109375	0.500285	33	37	52	24	32	22
	ENSMUSG00000029093.14	Sorcs2	0.227666	3.88711	7.58782	0.0109796	0.500285	457	476	564	651	643	517
	ENSMUSG00000030966.13	Trim21	0.354117	6.40526	11.6713	0.0109236	0.500285	2923	2495	2753	4275	3672	2906
	ENSMUSG00000037138.18	Aff3	-0.275872	5.15694	9.20495	0.0109903	0.500285	1254	1387	1666	1315	1405	964
	ENSMUSG00000046079.16	Lrrc8d	-0.187926	5.96261	7.86081	0.0109516	0.500285	2255.71	2266	2802.84	2194.63	2170	2226
	ENSMUSG00000050410.15	Tcf19	-0.255977	3.94811	7.65489	0.0109842	0.500285	556	610	678	476	577	535
	ENSMUSG00000078137.1	Ankrd63	-2.1079	-2.71816	7.58455	0.0109947	0.500285	9	3	6	1	1	2
	ENSMUSG00000092490.7	Gm20482	-1.02995	-1.11297	7.58452	0.0109949	0.500285	22.42	25.17	12.96	8.95	13.13	8.65
	ENSMUSG00000115518.1	Gm10791	-0.569622	0.575951	7.58649	0.0109858	0.500285	65	49	76	50	49	33
	ENSMUSG00000042564.13	Fam227a	-0.522179	0.761746	7.57524	0.0110378	0.501006	69	64	81	55	46	52
	ENSMUSG00000076609.2	Igkc	-0.660041	3.67301	13.0115	0.0110363	0.501006	512	468	748	402	457	269
	ENSMUSG00000092283.1	Gm20412	0.303651	3.2263	7.58495	0.0110376	0.501006	265.9	264.02	392.45	375.78	439.08	353.48
	ENSMUSG00000063388.5	BC023105	0.958367	2.32368	13.065	0.0110796	0.50167	157.01	115	95	324.5	235	186
	ENSMUSG00000108934.1	Gm44732	4.74515	-3.35176	7.98969	0.0110709	0.50167	0	0	0	6.33	3.61	0
	ENSMUSG00000117970.1	Gm4402	0.595013	0.397275	7.56776	0.0110726	0.50167	39	39	32	61	66	46
	ENSMUSG00000105826.1	Gm42141	0.857809	-0.56912	7.56216	0.0110987	0.502124	15	20	13	27	42	22
	ENSMUSG00000015085.8	Entpd2	0.204555	5.25728	7.81878	0.0111432	0.502184	1188.85	1215.18	1514	1658.8	1759.92	1251.78
	ENSMUSG00000021108.18	Prkch	-0.173815	5.72697	7.55714	0.0111222	0.502184	1954	1977	2246	1837	1918	1875
	ENSMUSG00000024173.11	Tpsab1	0.400511	2.20312	7.59569	0.0111337	0.502184	138	165	126	210	185	192
	ENSMUSG00000042228.14	Lyn	0.196229	5.54788	7.80575	0.0111454	0.502184	1558	1466	1778	2214.73	1927	1552
	ENSMUSG00000046572.10	Zfp518b	0.31461	2.66891	7.55253	0.0111438	0.502184	197	201	220	280	302	215
	ENSMUSG00000024764.10	Naa40	0.185685	4.77329	7.53418	0.0112302	0.503732	915	917	975	1125	1124	1046
	ENSMUSG00000029135.10	Fosl2	-0.15026	8.50387	7.53331	0.0112342	0.503732	13341	12844	15956	13350	13547	12165
	ENSMUSG00000036430.8	Tbcc	0.313101	2.84247	7.53691	0.0112173	0.503732	220	250	226	301	310	284
	ENSMUSG00000049717.9	Lig4	0.329077	2.39028	7.53337	0.011234	0.503732	156	166	184	244	221	192
	ENSMUSG00000051147.10	Nat2	0.377312	2.44952	7.60406	0.0112129	0.503732	158	198	159	235	223	234
	ENSMUSG00000056724.15	Nbeal2	-0.170028	6.47287	7.54267	0.0111901	0.503732	3290	3284	3779	3034	3253	3168
	ENSMUSG00000028675.12	Pnrc2	0.15829	6.41675	7.52693	0.0112645	0.50468	3046	2726	3107	3743	3539	2972
	ENSMUSG00000078994.9	Zfp429	0.389618	1.73537	7.51869	0.0113036	0.506025	103.11	103	105.26	150.31	147.75	124.29
	ENSMUSG00000099342.1	Gm18180	2.06566	-2.59509	7.51047	0.0113429	0.507372	0	2.31	2.18	4.26	9.14	7.16
	ENSMUSG00000116704.1	Gm5491	-2.51683	-2.99665	7.50326	0.0113774	0.508506	4.12	6.18	3.53	1.08	1.12	0
	ENSMUSG00000076940.3	Iglv2	-2.0381	-2.76114	7.49347	0.0114244	0.510197	6	6	5	2	1	1
	ENSMUSG00000000441.17	Raf1	-0.147477	6.84432	7.48458	0.0114674	0.510648	4396.38	4057.08	4849.58	4155.57	4404.49	3819.66
	ENSMUSG00000020272.8	Stk10	-0.257364	3.96461	7.60483	0.0114933	0.510648	586	556	730	521	516	565
	ENSMUSG00000034471.12	Caskin2	-0.181887	4.95169	7.47804	0.0114991	0.510648	1125.64	1123.01	1374.36	1105.04	1120.09	1057.48
	ENSMUSG00000063779.6	Chil4	3.22306	-3.10169	7.48851	0.0114484	0.510648	0	1.02	0	9	1.01	3.05
	ENSMUSG00000087598.9	Zfp111	0.491862	2.86148	9.24039	0.0114936	0.510648	205	265.93	183	313	341.69	302
	ENSMUSG00000101389.1	Ms4a4a	0.277072	3.24582	7.4863	0.011459	0.510648	319	300	318	454	392	331
	ENSMUSG00000118200.1	Gm31621	1.38806	-1.97481	7.48208	0.0114795	0.510648	4	2	6	14	11	8
	ENSMUSG00000069793.12	Slfn9	0.575757	5.77073	15.2862	0.0115093	0.510694	1786.23	1522.31	1489.8	2867.67	2653.39	1940.39
	ENSMUSG00000061887.14	Ssbp3	-0.186257	5.42407	7.48362	0.0115257	0.511013	1591	1498	1954	1436	1714	1408
	ENSMUSG00000021890.6	Eaf1	-0.161286	6.24142	7.46691	0.0115532	0.511055	2769.67	2727.04	3308	2639.22	2823.63	2627.62
	ENSMUSG00000022216.17	Psme1	0.153835	6.3395	7.46664	0.0115545	0.511055	2765	2681	2983	3538.14	3379	2791
	ENSMUSG00000032330.7	Cox7a2	-0.149426	6.18374	7.46479	0.0115636	0.511055	2733	2706	2964	2664	2740	2419
	ENSMUSG00000033192.5	Lpcat2	-0.182993	4.91768	7.4659	0.0115582	0.511055	1090.03	1123.16	1323.8	1058.36	1120.05	1027.19
	ENSMUSG00000016386.15	Mpped2	0.578469	0.516475	7.46185	0.011578	0.511284	38	40	43	72	73	43
	ENSMUSG00000037953.7	A4gnt	0.484652	1.29018	7.45668	0.0116032	0.511993	68	78	73	94	101	120
	ENSMUSG00000000881.12	Dlg3	-0.200333	4.83989	7.44927	0.0116396	0.512375	1130	1011	1228	934	1082	998
	ENSMUSG00000026765.12	Lypd6b	-0.2476	4.62099	8.05133	0.0116257	0.512375	946	930	1059	767	876	894
	ENSMUSG00000063971.7	Krt88	4.45643	-3.48465	7.55952	0.0116393	0.512375	0	0	0	1	5	2
	ENSMUSG00000058818.13	Pirb	0.21317	4.70983	7.50842	0.011699	0.514172	869.53	826.55	968.42	1245.62	1105.7	850.43
	ENSMUSG00000092374.1	Gm6623	2.56435	-2.99875	7.43881	0.0116912	0.514172	0	1	1	3	5	6
	ENSMUSG00000030353.15	Tead4	-0.232697	4.32461	7.50528	0.011752	0.516042	847	708	821	669	698	712
	ENSMUSG00000034429.15	Zfp707	0.370432	2.34912	7.4249	0.0117602	0.516042	150	178	154	211	207	225
	ENSMUSG00000052749.9	Trim30b	0.502592	3.14443	9.76963	0.0117819	0.516587	295.19	233	271	507	387	284
	ENSMUSG00000087138.1	Gm15545	0.456818	1.19437	7.41117	0.0118287	0.518228	70.69	70.65	65.25	98.06	99.28	95.82
	ENSMUSG00000070822.5	Zscan18	-0.315997	2.68655	7.40906	0.0118392	0.51828	251	250	279	206	214	224
	ENSMUSG00000084174.3	Sycn	-3.44581	-3.04982	7.69163	0.0118649	0.518992	1	11	2	1	0	0
	ENSMUSG00000078262.5	Krtap4-9	-0.497649	4.85994	12.667	0.0118975	0.520009	1109	1011	1652	913	932	880.9
	ENSMUSG00000018634.10	Crhr1	2.55687	-2.99938	7.39366	0.0119167	0.520028	1	0	1	3	7	4
	ENSMUSG00000043639.15	Rbm20	0.270291	3.36583	7.39396	0.0119152	0.520028	359	297	368	445	488	346
	ENSMUSG00000043155.4	Hpdl	0.486407	1.15918	7.39071	0.0119316	0.520268	55	77	67	111	93	85
	ENSMUSG00000027714.11	Exosc9	-0.17472	4.87148	7.38437	0.0119637	0.521258	1119.06	1082.78	1207.91	1082.24	1063.45	971.3
	ENSMUSG00000029650.10	Slc46a3	0.287369	3.05834	7.36611	0.0120567	0.521322	288	246	286	392	362	283
	ENSMUSG00000030148.15	Clec4a2	-0.359937	2.21408	7.35225	0.0121277	0.521322	191.99	174	202	181	162	116
	ENSMUSG00000031242.7	2610002M06Rik	0.283871	3.30493	7.35635	0.0121066	0.521322	338	297	340	467	452	314
	ENSMUSG00000032311.17	Nrg4	-0.236593	3.67774	7.36428	0.012066	0.521322	506.74	456.45	556.77	493.67	466.66	373.38
	ENSMUSG00000035517.17	Tdrd7	0.429787	5.63002	12.3371	0.0121287	0.521322	1696	1402	1532	2513	2305	1674
	ENSMUSG00000055305.15	Zfp93	0.519036	0.763473	7.37694	0.0120014	0.521322	52	50.73	45.36	75.61	73	71
	ENSMUSG00000057497.8	Fam136a	0.241925	4.07579	7.39797	0.0119919	0.521322	544.08	588.17	556.87	687.88	679.8	693.78
	ENSMUSG00000062210.13	Tnfaip8	-0.148801	6.18368	7.38067	0.0119825	0.521322	2732.48	2581	3106.54	2765	2643.15	2415.99
	ENSMUSG00000067203.8	H2-K2	0.270721	4.39666	8.15564	0.0120212	0.521322	728.52	691.32	667.84	965.36	973.66	685.59
	ENSMUSG00000070601.5	Vmn2r84	0.944175	-1.01455	7.36579	0.0120583	0.521322	9	9	15	21	30	15
	ENSMUSG00000074923.10	Pak6	-0.209385	6.76804	8.28148	0.0120327	0.521322	4146	4053	4667	3699	3741	3973
	ENSMUSG00000076547.2	Igkv4-70	-4.48752	-3.48477	7.45851	0.0121345	0.521322	1	1	6	0	0	0
	ENSMUSG00000096433.2	Zfp994	0.313104	2.81909	7.35419	0.0121178	0.521322	225.13	235.65	224.23	340.63	294.84	248.18
	ENSMUSG00000098900.2	Gm18190	1.46665	-1.85981	7.37303	0.0120213	0.521322	4.69	2.94	5.17	17.2	4.39	15.26
	ENSMUSG00000102428.1	Pcdhga12	0.39822	1.74782	7.36427	0.0120661	0.521322	97.67	107.5	107.75	154.09	160.31	113.82
	ENSMUSG00000103105.5	Gm18752	1.70285	-2.22808	7.35458	0.0121158	0.521322	4.25	0	3.78	11.33	9	7.45
	ENSMUSG00000112652.1	4921516A02Rik	5.04249	-3.21457	8.49448	0.0121034	0.521322	0	0	0	7.23	0	4.88
	ENSMUSG00000117310.2	Ptp4a1	-0.217903	7.20736	8.48999	0.0121067	0.521322	5885.57	4798.75	6897.57	5628.75	5557.81	4386.91
	ENSMUSG00000073755.4	5730409E04Rik	0.202529	4.18471	7.34076	0.012187	0.523174	580	595	682	773	781	653
	ENSMUSG00000016024.9	Lbp	0.320618	8.15098	10.6935	0.0122038	0.523489	9232	8806	9760	14203	12655	9254
	ENSMUSG00000020349.4	Ppp2ca	-0.146933	8.11257	7.31649	0.0123133	0.525438	10543.4	9799.55	11704	9953.81	10455	9394
	ENSMUSG00000036902.11	Neto2	0.515665	1.07863	7.31938	0.0122982	0.525438	60	48	79	117	79	79
	ENSMUSG00000039988.14	Ankrd13c	-0.159071	6.12039	7.31605	0.0123156	0.525438	2675	2341	3085	2527	2582	2346
	ENSMUSG00000055415.8	Atp10b	-0.194706	4.98143	7.317	0.0123107	0.525438	1221.88	1139	1347.82	1037	1168.34	1123.79
	ENSMUSG00000062933.7	Gm10123	-0.147408	7.54425	7.32246	0.0122821	0.525438	6894.65	7006.94	7673.29	6816.78	6987.53	6294.68
	ENSMUSG00000085148.1	Mir22hg	-0.17218	5.47463	7.32547	0.0122664	0.525438	1774.71	1525.86	1887.55	1628.75	1770.77	1359.68
	ENSMUSG00000107215.1	Gm43197	1.43775	1.63911	14.3312	0.012293	0.525438	75	63	41	229	184	98
	ENSMUSG00000042439.13	Zfp532	-0.166929	5.10443	7.31297	0.0123318	0.525722	1264.77	1259.54	1480.19	1244.79	1323.47	1111.44
	ENSMUSG00000001768.16	Rin2	0.151868	8.16335	7.3106	0.0123442	0.525846	9652	9698	10511	12560	11598	10164
	ENSMUSG00000032348.6	Gsta4	0.274049	3.41268	7.30792	0.0123582	0.526041	310	362	383	512	438	371
	ENSMUSG00000001166.17	Oas1c	0.293113	2.9648	7.29268	0.0124386	0.527519	256.8	247.82	260.84	375.76	327	269.87
	ENSMUSG00000003617.16	Cp	0.200954	6.69588	8.02178	0.0124613	0.527519	3682	3410	3487	4713	4449.45	3481.34
	ENSMUSG00000030474.9	Siglece	0.450502	1.14812	7.28992	0.0124532	0.527519	68	59	74	107	98	79
	ENSMUSG00000037692.14	Ahdc1	-0.217219	5.56586	8.02759	0.0124691	0.527519	1733	1685	2204	1547	1739	1667
	ENSMUSG00000039349.5	C130074G19Rik	0.249997	3.89418	7.30175	0.0124178	0.527519	512	440	539	701	665	473
	ENSMUSG00000049493.13	Pls1	-0.608494	0.0722212	7.29182	0.0124432	0.527519	45	43	45	31	31	28
	ENSMUSG00000064165.8	Krt39	-0.366346	2.75365	7.58735	0.0124135	0.527519	243	250	341	204	210	246
	ENSMUSG00000074794.10	Arrdc3	0.183211	8.38721	7.66566	0.0124246	0.527519	11779	10764	11930	15496	14035	11099
	ENSMUSG00000032298.13	Neil1	0.33994	2.37579	7.28141	0.0124984	0.528356	158	150	192	195	248	208
	ENSMUSG00000018796.13	Acsl1	-0.169591	7.62436	7.36471	0.012517	0.528541	7707.8	6923	8387	6680	7317.72	7017.52
	ENSMUSG00000061718.12	Ppp1r1b	0.485106	1.26962	7.277	0.0125219	0.528541	59	85.48	70.61	124	104	85
	ENSMUSG00000115919.1	Gm31583	0.508869	0.884343	7.26623	0.0125794	0.530566	52	60	50	91	75	73
	ENSMUSG00000046909.9	Tefm	0.292622	2.75212	7.25313	0.0126498	0.532724	230	199	232	292	290	254
	ENSMUSG00000053390.16	Zfp952	0.270673	3.1769	7.25326	0.0126491	0.532724	294	305	295	400	388	330
	ENSMUSG00000031799.10	Tpm4	-0.146477	8.47555	7.24022	0.0127196	0.534305	13754.2	12636.2	14792.5	13121.7	13099.8	12108
	ENSMUSG00000032491.14	Nradd	-0.23274	3.54318	7.23819	0.0127306	0.534305	452	432	497	417	418	377
	ENSMUSG00000035764.5	Fbxo45	-0.168778	5.54646	7.24102	0.0127153	0.534305	1807	1614	2030	1617	1767	1601
	ENSMUSG00000078453.3	Abracl	-0.180746	4.98777	7.23729	0.0127355	0.534305	1220	1074	1424	1198	1127	1047
	ENSMUSG00000085471.1	4933423P22Rik	1.50886	-2.10711	7.24439	0.012697	0.534305	1	3	6	9	13	8
	ENSMUSG00000052414.9	Gm28047	4.74934	-3.36033	7.73244	0.012799	0.536561	0	0	0	0	4.61	5.18
	ENSMUSG00000090628.1	Gm17083	-0.808688	-0.156278	7.41307	0.0128905	0.539953	41	30	48	38	17	15
	ENSMUSG00000091617.8	Gm3752	2.29826	-2.5453	7.45223	0.0128994	0.539953	0	4.09	0	6.35	5.88	10
	ENSMUSG00000034917.8	Tjp3	-0.235636	5.34767	8.19144	0.0129107	0.540017	1602	1460	1787	1279	1483	1461
	ENSMUSG00000038552.14	Fndc4	0.328831	2.80026	7.19076	0.012991	0.542968	225	199	251	338	330	212
	ENSMUSG00000039741.15	Bahcc1	-0.167308	5.31476	7.18718	0.0130109	0.543389	1516	1413	1706.46	1458.14	1416	1371
	ENSMUSG00000031765.8	Mt1	0.152367	10.9201	7.17712	0.013067	0.544909	67240	62591	72236	86340	79190	66813
	ENSMUSG00000044982.7	Sft2d3	0.264959	3.10941	7.17791	0.0130626	0.544909	263	269	327	364	370	329
	ENSMUSG00000002771.12	Grin2d	-0.34165	2.23832	7.17403	0.0130843	0.54522	166.63	181.05	228.51	166.64	155.15	145.73
	ENSMUSG00000024659.15	Anxa1	-0.1471	9.33174	7.17162	0.0130978	0.545372	24923	23303	26275	23616	23822	21934
	ENSMUSG00000005125.13	Ndrg1	0.147513	7.49777	7.15885	0.0131695	0.546731	6133.99	6071.99	6650.99	7633.98	7203.99	6718.98
	ENSMUSG00000028132.15	Tmem56	-0.402795	5.12802	11.0505	0.0131553	0.546731	1491	1256	1643	1356	1234	853
	ENSMUSG00000032560.14	Dnajc13	0.154505	6.26277	7.15878	0.0131699	0.546731	2731.99	2458	2801	3326.99	3253.95	2629
	ENSMUSG00000050732.9	Vamp8	-0.144587	6.36964	7.16251	0.0131489	0.546731	3042	3054	3458	3070	3088	2757
	ENSMUSG00000069248.11	Serpinb6e	0.811732	4.685	15.8406	0.0132098	0.547981	757	725	549	1357	1376	999
	ENSMUSG00000058624.13	Gda	0.184626	7.19796	7.58121	0.013261	0.548764	5078	4794	5232	6906	5863	5026
	ENSMUSG00000078954.9	Arhgap8	0.501348	1.14515	7.14268	0.0132609	0.548764	73	58	65	127	87	74
	ENSMUSG00000105447.1	Gm43653	-2.03676	-2.74208	7.14138	0.0132683	0.548764	3.05	8.15	6.15	2.05	1.02	1.02
	ENSMUSG00000117257.1	Gm4948	-0.376506	2.01892	7.14198	0.0132649	0.548764	172	130	198	142	126	127
	ENSMUSG00000060733.13	Ipmk	-0.175703	5.6193	7.13876	0.0132832	0.54897	1918	1653	2182	1906	1901	1454
	ENSMUSG00000018459.15	Slc13a3	-0.41154	2.40162	7.58344	0.0132932	0.548974	218	158	287	199	166	146
	ENSMUSG00000026141.13	Col19a1	1.23454	-1.80757	7.13405	0.01331	0.549259	6	3	6	14	14	9
	ENSMUSG00000031398.13	Plxna3	-0.193282	5.14012	7.20811	0.0133491	0.550461	1319	1362	1449	1231	1217	1268
	ENSMUSG00000097239.7	Gm27029	0.73093	0.134486	7.31357	0.0133709	0.550951	28.66	22.63	35.07	31.05	69.62	47
	ENSMUSG00000021676.10	Iqgap2	0.377078	4.14662	9.26744	0.0134072	0.551679	612	541	531	911	779	589
	ENSMUSG00000026170.6	Cyp27a1	0.212252	4.55966	7.13293	0.0134085	0.551679	867	717	813	1050	1042	789
	ENSMUSG00000029624.10	Ptcd1	0.192038	4.48698	7.11378	0.0134262	0.551923	781.39	706.69	810.09	993.65	940.1	782.48
	ENSMUSG00000032702.16	Kank1	-0.146792	7.26013	7.11227	0.0134349	0.551923	5679	5434	6649	5504	5783	5216
	ENSMUSG00000102854.1	C130023A14Rik	1.22798	-1.73937	7.11064	0.0134443	0.551923	5	6	5	14	9	16
	ENSMUSG00000009628.14	Tex15	0.798432	-0.667759	7.10333	0.0134865	0.552168	12	17	17	25	34	24
	ENSMUSG00000015957.12	Wnt11	-0.321279	3.04059	7.23336	0.0135178	0.552168	296	297	412	259	341	229
	ENSMUSG00000025993.10	Slc40a1	-0.22122	4.3407	7.09754	0.01352	0.552168	698	758	947	674	753	689
	ENSMUSG00000027596.10	a	0.805618	-0.323853	7.10251	0.0134912	0.552168	16	27	16	49	35	24
	ENSMUSG00000061286.7	Exosc5	0.195872	4.44452	7.10587	0.0134718	0.552168	673	738.32	817.75	915	900	818.15
	ENSMUSG00000070334.4	Krtap31-1	-1.21039	0.618539	10.4159	0.0135111	0.552168	41.9	68.23	120.76	30.82	29.02	41.07
	ENSMUSG00000074643.12	Cpne1	0.157646	5.60487	7.10187	0.0134949	0.552168	1641.41	1550.88	1874.25	2037.71	1942.18	1836.53
	ENSMUSG00000004936.8	Map2k1	0.191515	6.15847	7.59903	0.0136045	0.55374	2480	2242	2616	3357	2984	2347
	ENSMUSG00000024142.15	Mlst8	0.195533	4.25091	7.08768	0.0135774	0.55374	609	617	724.53	791	808	704
	ENSMUSG00000025105.10	Bnc1	-0.174919	5.12283	7.0794	0.0136257	0.55374	1301	1276	1488	1252	1228	1222
	ENSMUSG00000028527.18	Ak4	0.222894	4.4626	7.19767	0.0135999	0.55374	793.9	699.82	734.83	915.54	865.53	899.89
	ENSMUSG00000036412.5	Arsi	0.189702	4.96517	7.07893	0.0136284	0.55374	1055	979	1177	1399	1386	1010
	ENSMUSG00000048154.17	Kmt2d	-0.141086	7.5744	7.08024	0.0136208	0.55374	7301.94	6694	8028.94	7253.82	7202.82	6156
	ENSMUSG00000070305.10	Mpzl3	-0.162997	6.20326	7.08148	0.0136135	0.55374	2855.97	2711.95	2986	2543	2717.98	2606
	ENSMUSG00000040957.15	Cables1	0.177394	5.0812	7.07718	0.0136387	0.553751	1120.02	1150.69	1215.97	1439.99	1328.91	1298.98
	ENSMUSG00000023959.9	Clic5	0.199243	6.46964	7.77994	0.0136551	0.554011	3017	2640	3449	3896	4044	2878
	ENSMUSG00000029442.18	Wdr66	0.444953	1.48227	7.07125	0.0136735	0.554351	89	88	77	147	119	94
	ENSMUSG00000047861.2	Foxi1	2.12427	-2.6769	7.06553	0.0137071	0.554496	1	0	3	4	6	9
	ENSMUSG00000089998.2	Phtf1os	0.500149	0.747065	7.06698	0.0136986	0.554496	51.13	41.75	55.18	70.21	80.76	65.1
	ENSMUSG00000095457.3	Gm8989	4.50987	-3.45803	7.17176	0.0136887	0.554496	0	0	0	3.97	4.41	0
	ENSMUSG00000000278.10	Scpep1	0.146331	6.27916	7.06192	0.0137284	0.554549	2542	2541	3041	3204	3329	2745
	ENSMUSG00000001542.7	Ell2	-0.173273	5.25563	7.06361	0.0137184	0.554549	1459	1276	1735	1441	1413	1224
	ENSMUSG00000034708.11	Grn	0.15498	7.87857	7.05149	0.0137901	0.556634	7484	7603	9500	10232	9668	8309
	ENSMUSG00000029227.15	Fip1l1	-0.147803	5.99426	7.0433	0.0138387	0.558192	2399	2225.52	2761.49	2381.13	2358.6	2123.46
	ENSMUSG00000026172.12	Bcs1l	0.323931	2.27276	7.04031	0.0138565	0.558439	146	142	180	204	211	188
	ENSMUSG00000050428.7	Fbxo46	0.269609	3.17915	7.03889	0.013865	0.558439	262.31	305.69	330.48	407.44	383.51	328.55
	ENSMUSG00000097002.1	Gm2670	0.464487	1.16016	7.03695	0.0138765	0.558498	71.94	70	58.79	100.26	93.59	93
	ENSMUSG00000038256.15	Bcl9	0.192021	4.54354	7.03308	0.0138997	0.558618	721	773	900	1021	955	845
	ENSMUSG00000057719.11	Sh3rf2	-0.198188	5.53254	7.42236	0.0138957	0.558618	1957	1513	1980	1662	1825	1418
	ENSMUSG00000022037.15	Clu	0.174732	8.16207	7.26982	0.0139563	0.55927	9677	9851	10006	11895	13139	9619
	ENSMUSG00000028977.17	Casz1	-0.154086	7.35475	7.02457	0.0139507	0.55927	6119.91	5914.93	6956.79	5723	6051.75	5768.63
	ENSMUSG00000029705.17	Cux1	0.144841	6.37822	7.02825	0.0139286	0.55927	2762	2674	3274	3509	3414	3000
	ENSMUSG00000085355.2	3010003L21Rik	0.445046	1.08397	7.02496	0.0139483	0.55927	60.08	61.16	71.31	92.11	91.11	86.88
	ENSMUSG00000097378.8	B230208H11Rik	-0.789433	-0.645903	7.02124	0.0139707	0.559444	30	24	28	15	22	12
	ENSMUSG00000040681.16	Hmgn1	-0.152876	7.73065	7.01458	0.0140108	0.560241	7971.04	7606	9066.63	7565.56	7721.25	7488.24
	ENSMUSG00000047115.15	Fam221a	-0.347912	2.11121	7.01483	0.0140093	0.560241	160	172	195	134	150	142
	ENSMUSG00000097309.2	Gm17249	0.508439	0.641098	7.01119	0.0140313	0.560654	44.72	43.91	47.86	72.93	68.83	59.09
	ENSMUSG00000033033.10	Calhm2	0.307879	2.60054	7.00911	0.0140439	0.560754	193.88	186.52	210.65	287.39	237.3	230.51
	ENSMUSG00000024812.11	Tjp2	-0.156891	6.19168	7.00044	0.0140964	0.562041	2718	2642	3127	2595	2643	2584
	ENSMUSG00000102153.1	Gm37474	4.27582	-3.55848	7.10013	0.0140893	0.562041	0	0	0	3	2	2
	ENSMUSG00000050232.6	Cxcr3	-1.38024	-2.0252	6.99859	0.0141077	0.562086	11	6	14	6	3	3
	ENSMUSG00000033916.5	Chmp2a	-0.144107	6.91108	6.99491	0.0141301	0.562574	4456	4269.01	5204.95	4391.06	4504	4076
	ENSMUSG00000030551.14	Nr2f2	0.304881	2.71456	6.98796	0.0141725	0.563048	195	202	244.95	317.97	268.97	231.99
	ENSMUSG00000031075.19	Ano1	-0.14932	6.38335	6.98817	0.0141711	0.563048	3084	3031	3553	3032	3043	2893
	ENSMUSG00000045534.4	Kcna5	0.590928	0.309534	6.98984	0.014161	0.563048	31	31	42	69	51	42
	ENSMUSG00000060743.12	H3f3a	-0.152387	8.68339	6.98177	0.0142103	0.56334	15161.1	14092.4	18575.5	15683.3	15069.2	13489.2
	ENSMUSG00000106988.1	Tsg101-ps	-0.231767	3.72641	6.98267	0.0142048	0.56334	468.87	493.67	609.48	463.77	472.14	440.02
	ENSMUSG00000116718.1	Gm49668	0.601434	0.531034	6.98473	0.0141922	0.56334	31	49	41.2	50	75	65
	ENSMUSG00000039364.13	Sectm1b	0.348251	2.46962	6.9756	0.0142482	0.564034	189	167	174	267	200	229
	ENSMUSG00000090300.1	Gm17119	2.64196	-3.09296	6.97633	0.0142437	0.564034	1.42	0	0.22	4.41	5.08	3.11
	ENSMUSG00000028600.15	Podn	0.202656	4.66789	6.96788	0.0142957	0.565511	759	841	1002	1071	1160	864
	ENSMUSG00000040687.16	Madd	-0.1648	5.42714	6.9639	0.0143203	0.565556	1685	1482	1842	1534	1584	1477
	ENSMUSG00000050014.8	Apol10b	0.524448	1.6029	7.52918	0.0143274	0.565556	89	78	102	163	160	80
	ENSMUSG00000118010.1	Gm50316	4.28123	-3.55822	7.06212	0.0143164	0.565556	0	0	0	2	2	3
	ENSMUSG00000036054.15	Sugp2	0.158993	5.21871	6.95289	0.0143885	0.567563	1244.81	1222.32	1402.09	1566.84	1588.7	1309.23
	ENSMUSG00000000555.8	Itga5	-0.181666	5.93227	7.20236	0.0144399	0.567973	2210	2166	2789	2207	2503	1813
	ENSMUSG00000030510.11	Cers3	-0.177048	5.89964	7.10197	0.0144325	0.567973	2351	2058	2572	2113	2080	2141
	ENSMUSG00000037017.15	Zscan21	0.242632	3.5048	6.94549	0.0144346	0.567973	386	357	395	491	520	385
	ENSMUSG00000056019.12	Zfp709	0.346547	2.02325	6.94923	0.0144113	0.567973	136.05	120	132	174.89	185.7	150
	ENSMUSG00000022865.14	Cxadr	0.160216	6.4328	6.93909	0.0144745	0.568527	3106.03	2686.22	3187.29	3874.83	3435.53	3056.66
	ENSMUSG00000030452.16	Nipa2	0.164696	5.02412	6.94055	0.0144654	0.568527	1112.9	1029.39	1233.29	1403.78	1346.52	1155.8
	ENSMUSG00000047098.18	Rnf31	0.16015	5.88143	6.93569	0.0144958	0.568961	2052.49	1908	2161	2655.74	2400	2024.79
	ENSMUSG00000019851.8	Perp	-0.160971	11.5983	6.93376	0.0145553	0.570795	118463	109813	132547	108206	111456	111488
	ENSMUSG00000025068.8	Gsto1	-0.170719	6.71721	7.08659	0.0145634	0.570795	3907	3972	4375	3679	3715	3796
	ENSMUSG00000025091.4	Pnliprp2	-4.49492	-3.4844	7.05963	0.0145838	0.570795	0	3	5	0	0	0
	ENSMUSG00000034333.15	Zbed4	0.209193	4.39848	6.92229	0.0145801	0.570795	698.98	743.98	695.99	879	927	760
	ENSMUSG00000020827.18	Mink1	-0.178787	7.55831	7.27247	0.0146327	0.570873	7009	6869.96	8178.91	6295.94	6905.93	6788.93
	ENSMUSG00000022639.14	Dubr	0.32113	2.4988	6.91676	0.0146149	0.570873	190	170	187	278	232	198
	ENSMUSG00000037001.10	Zfp39	0.327827	2.30139	6.91324	0.0146372	0.570873	170	149	155.75	204	223.45	189
	ENSMUSG00000042363.14	Lgalsl	-0.151716	7.85536	6.91631	0.0146178	0.570873	9002	7794	10107	8348	8685	7857
	ENSMUSG00000074283.5	Zfp109	0.471511	0.901814	6.91498	0.0146262	0.570873	60	51	56	86	79.3	74
	ENSMUSG00000043398.5	Gpr135	-0.421316	1.32413	6.89467	0.0147553	0.573459	89	99	122	82	80	76
	ENSMUSG00000052423.14	B4galt3	-0.167357	5.03322	6.89846	0.0147311	0.573459	1260.81	1123.58	1432.5	1219.23	1200.04	1079.1
	ENSMUSG00000053925.4	Gm9929	0.421077	1.2757	6.89576	0.0147484	0.573459	72.69	69.21	80.68	100.24	118.33	89.53
	ENSMUSG00000087117.8	Gm11523	-4.32926	-3.55757	6.99673	0.0147165	0.573459	2	4	1	0	0	0
	ENSMUSG00000111118.1	Gm6545	0.928974	-0.118206	7.7129	0.0147419	0.573459	22	22	21	60	52	18
	ENSMUSG00000078606.8	Gm4070	0.535433	5.65701	13.2679	0.0147833	0.574145	1607.53	1331.8	1591.48	2673.79	2504.78	1656.31
	ENSMUSG00000026024.14	Als2	0.200356	4.61779	6.88347	0.014827	0.57544	812.66	850.33	839.1	1120.87	993.2	867.11
	ENSMUSG00000044037.15	Als2cl	-0.191168	6.93188	7.48258	0.0148567	0.576187	4392.5	4718.28	5211.82	4184.67	4313.64	4388.23
	ENSMUSG00000052837.6	Junb	-0.177198	8.22223	7.20268	0.0148701	0.576306	10451	10623	13975	10368	11703	9774
	ENSMUSG00000029204.7	Rhoh	0.394701	1.97343	6.86872	0.0149221	0.577872	129	97	143	202	176	124
	ENSMUSG00000087055.1	Gm11948	-0.551188	0.544307	6.86728	0.0149314	0.577872	58	52	75	40	40	49
	ENSMUSG00000025794.9	Rpl14	0.164419	8.7432	6.92669	0.0149458	0.578027	13030.7	14196.5	17392.4	17372.8	17817.3	16193.5
	ENSMUSG00000001983.7	Taco1	0.280942	2.79774	6.82589	0.015202	0.578091	226.99	210.08	248.98	280.98	304.43	273.33
	ENSMUSG00000020782.18	Llgl2	-0.174823	5.30466	6.85755	0.0149945	0.578091	1477	1431	1706	1367	1419	1411
	ENSMUSG00000021423.6	Ly86	0.25621	3.96907	7.09207	0.0151009	0.578091	480	451	643	755	642	539
	ENSMUSG00000022364.14	Tbc1d31	-0.335206	2.38669	6.85175	0.0150323	0.578091	186	219	231	157	197	166
	ENSMUSG00000023034.7	Nr4a1	-0.616619	4.82733	13.262	0.0151539	0.578091	1128	1006	1681	823	998	729
	ENSMUSG00000026180.8	Cxcr2	-0.254709	3.59749	6.86017	0.0149775	0.578091	531	389	527	452	434	365
	ENSMUSG00000027300.10	Ubox5	0.245816	3.33007	6.83367	0.0151507	0.578091	316.36	330.4	360	450.18	431	354.26
	ENSMUSG00000027514.14	Zbp1	0.774736	5.39678	15.2081	0.015248	0.578091	1287	1041	1076	2529	2062	1489
	ENSMUSG00000028358.15	Zfp618	0.286043	3.10002	6.82871	0.0151834	0.578091	251	274	321	418	367	283
	ENSMUSG00000029449.11	Rhof	-0.352791	2.25181	6.81843	0.0152513	0.578091	186.84	183.44	212.08	131.04	186.24	152.45
	ENSMUSG00000032342.13	Mto1	0.230229	3.69954	6.85643	0.0150018	0.578091	438.61	427.52	441.73	525.85	543.66	513.9
	ENSMUSG00000034459.8	Ifit1	0.220713	9.96774	8.04713	0.0150986	0.578091	34622.2	30555.2	36718.7	46274.3	44950.5	32042.9
	ENSMUSG00000035237.7	Lcat	0.524088	0.738135	6.81892	0.015248	0.578091	42	58	45	73	73	70
	ENSMUSG00000036826.14	Igflr1	1.17241	-0.832992	7.58467	0.0152492	0.578091	6.21	19.48	8.26	16.98	31.28	31.28
	ENSMUSG00000037921.15	Ddx60	1.10668	4.03431	15.5441	0.0150633	0.578091	421	362	351	1149	868	543
	ENSMUSG00000040818.10	Dennd6a	0.229093	4.34347	7.00031	0.0152102	0.578091	642	652	760	980	865	651
	ENSMUSG00000043257.15	Pigv	0.205493	4.1363	6.83968	0.0151112	0.578091	574	599	616	773	742	622
	ENSMUSG00000043487.4	Acot6	0.210271	4.40499	6.83103	0.0151681	0.578091	720.03	734.61	693.08	946.37	879.99	753.02
	ENSMUSG00000050737.13	Ptges	0.142569	7.52564	6.82977	0.0151764	0.578091	6427	5977	6873	7443	7520	6963
	ENSMUSG00000067370.4	B3galt4	0.390451	1.69126	6.84746	0.0150603	0.578091	102	98	102	125	144	139
	ENSMUSG00000069184.4	Zfp72	0.602819	0.12433	6.83076	0.0151699	0.578091	29	34	27	53	48	41
	ENSMUSG00000070469.12	Adamtsl3	0.219524	4.23213	6.8454	0.0150738	0.578091	639	559	712	840	858	605
	ENSMUSG00000075028.12	Prdm11	0.280665	2.8392	6.85546	0.0150082	0.578091	237	207	263	292	322	271
	ENSMUSG00000085178.1	Kdm6bos	-0.636303	-0.139997	6.8208	0.0152356	0.578091	38.85	34.27	41.71	25.31	30.26	20.67
	ENSMUSG00000085891.7	Gm14634	-0.745113	-0.614854	6.85158	0.0150334	0.578091	28	27	28	19	16	16
	ENSMUSG00000099354.6	1700124L16Rik	-0.816419	-0.695067	6.85034	0.0150415	0.578091	30.83	19	30	13	14.58	18.7
	ENSMUSG00000102644.5	Thap6	0.316206	2.35717	6.84054	0.0151056	0.578091	150.99	169.44	175.98	225.89	220.69	192.38
	ENSMUSG00000113003.1	Gm47138	4.26998	-3.55876	6.9189	0.0152091	0.578091	0	0	0	3	3	1
	ENSMUSG00000115222.1	Gm49747	0.303355	2.60847	6.81706	0.0152604	0.578091	202.68	180.86	212.13	235.82	272.52	248.55
	ENSMUSG00000115302.1	Gm49394	4.51265	-3.45665	7.00139	0.0152238	0.578091	0	0	0	2.83	5.57	0
	ENSMUSG00000027639.16	Samhd1	0.423489	8.58148	11.8765	0.0152907	0.578842	12863	11081	11991.9	19858	17308	13017
	ENSMUSG00000022812.14	Gsk3b	-0.152849	6.63992	6.78914	0.0154467	0.583951	3910	3308	4372	3789	3783	3170
	ENSMUSG00000099032.2	Tcf24	-0.734996	-0.0163831	6.91127	0.0154407	0.583951	42	32	55.82	18	25	36.18
	ENSMUSG00000070990.2	Foxe1	0.930426	-0.840569	6.78715	0.0154601	0.58406	5	18	15	26	24	25
	ENSMUSG00000004530.12	Coro1c	-0.159566	7.54758	6.78088	0.0155172	0.585021	6686	6796	8298	6483	6941	6588
	ENSMUSG00000028680.14	Plk3	-0.341159	5.62215	9.86722	0.01551	0.585021	1860	1827	2391	1506	1661	1735
	ENSMUSG00000071656.7	Lrrn4cl	-0.176454	5.21548	6.78162	0.0154974	0.585021	1406	1286	1655	1395	1487	1093
	ENSMUSG00000000317.11	Bcl6b	0.330917	2.30699	6.77439	0.0155462	0.585318	163	143	171	235	225	162
	ENSMUSG00000031523.16	Dlc1	-0.151516	5.94883	6.77515	0.0155411	0.585318	2253	2189	2727	2196	2373	2071
	ENSMUSG00000031217.8	Efnb1	-0.211218	4.73956	6.97612	0.0155902	0.586573	911	1017	1230	910	958	931
	ENSMUSG00000021886.7	Gpr65	-0.398972	2.1159	6.89561	0.0156297	0.58703	186	136	217	170	149	103
	ENSMUSG00000026883.17	Dab2ip	-0.151006	6.7934	6.76144	0.0156341	0.58703	4179	3953	4727	3811	4318.46	3790.86
	ENSMUSG00000044309.8	Apol7c	0.674667	0.0695252	6.76379	0.0156181	0.58703	21	39.43	23.29	46.46	49	43.52
	ENSMUSG00000073559.2	Gm8618	4.28078	-3.55824	6.84784	0.0156748	0.587761	0	0	0	1	3	3
	ENSMUSG00000090061.9	Nwd2	4.28078	-3.55824	6.84784	0.0156748	0.587761	0	0	0	1	3	3
	ENSMUSG00000020481.15	Ankrd36	4.28167	-3.5582	6.84264	0.0157095	0.588665	0	0	0	3	1	3
	ENSMUSG00000091376.1	Aadacl2	-0.256107	3.35005	6.73178	0.0158375	0.59306	405	394	415	355	337	355
	ENSMUSG00000006930.15	Hap1	0.496502	3.81816	9.92601	0.0158798	0.593843	476	399	403	778	635	467
	ENSMUSG00000024594.9	Prrc1	-0.142064	6.61902	6.72718	0.0158693	0.593843	3625	3449	4301	3605	3772	3238
	ENSMUSG00000097119.2	B230354K17Rik	0.294233	2.63589	6.72342	0.0158953	0.594023	196	205	207	260	264	246
	ENSMUSG00000021598.9	Med10	-0.159159	5.18437	6.71951	0.0159225	0.594636	1344	1342	1533	1365	1315	1215
	ENSMUSG00000106734.3	Gm20559	0.794431	5.20798	14.855	0.015962	0.59571	1135.65	908.69	913.76	2197.35	1866.87	1297.55
	ENSMUSG00000066278.6	Vps37b	-0.187097	4.59132	6.70685	0.0160107	0.597127	935.19	819.47	1073.25	845.92	944.66	767.98
	ENSMUSG00000117426.1	Gm33055	4.26954	-3.55878	6.79519	0.0160301	0.597447	0	0	0	2	4	1
	ENSMUSG00000022066.16	Entpd4b	-0.158888	5.81324	6.69552	0.0160901	0.598246	2190.3	1975.32	2364.22	1953.58	2091.84	1969.36
	ENSMUSG00000042901.10	Aida	0.303521	6.64922	9.47476	0.016076	0.598246	3435.84	3075.2	3357.82	4989.67	4343.77	3331.5
	ENSMUSG00000076535.1	Igkv1-88	-2.95813	-3.28229	6.69487	0.0160947	0.598246	4	3	3	1	0	0
	ENSMUSG00000115441.1	Gm34759	4.27043	-3.55874	6.79002	0.0160655	0.598246	0	0	0	4	2	1
	ENSMUSG00000053054.13	Adh6a	-0.411556	1.91676	6.75301	0.0161199	0.598781	182	153	131	111	132	120
	ENSMUSG00000020395.13	Itk	-0.472602	0.998458	6.68613	0.0161563	0.599452	66	80	104	60	70.32	55
	ENSMUSG00000091144.2	Phf11c	0.331542	2.80926	6.797	0.0161596	0.599452	244.15	201.02	231.83	347.9	325.33	213.11
	ENSMUSG00000022195.7	6030458C11Rik	0.179315	4.8327	6.68153	0.0161888	0.600134	1019	921	991	1193	1150	1084
	ENSMUSG00000050234.7	Gja4	0.387142	2.17817	6.77914	0.0162321	0.600934	146	128	152	214	236	130
	ENSMUSG00000113492.1	Gm47792	2.54277	-3.00006	6.67619	0.0162267	0.600934	0	1	1	7	6	1
	ENSMUSG00000003929.11	Zfp81	0.235389	3.3689	6.65791	0.0163569	0.601242	338	328	373	447	453	365
	ENSMUSG00000005483.10	Dnajb1	-0.177487	6.42167	6.97135	0.0164682	0.601242	3204	3188	3620	2938	3029	3122
	ENSMUSG00000011034.6	Slc5a1	-0.181554	5.96109	6.97022	0.0164447	0.601242	2400	2228	2662	2145	2175	2273
	ENSMUSG00000020955.9	Ap4s1	-0.214305	3.76363	6.669	0.0162777	0.601242	538	502	559	476	506	441
	ENSMUSG00000022220.14	Adcy4	0.256995	3.84617	6.84786	0.0164245	0.601242	501	444	490	694	636	453
	ENSMUSG00000023156.4	Rpp14	0.19228	4.27468	6.65495	0.0163781	0.601242	645	643	693	778	820	738
	ENSMUSG00000029605.16	Oas1b	0.592914	4.79962	12.5294	0.0164482	0.601242	890	804	731	1539	1285	994
	ENSMUSG00000029878.6	Dbpht2	0.917628	-1.23661	6.66711	0.0162913	0.601242	9	10	9	20	18	17
	ENSMUSG00000030144.4	Clec4d	0.334657	2.74684	6.74619	0.0164515	0.601242	253	184	210	330	262	252
	ENSMUSG00000033569.17	Adgrb3	2.10067	-2.67853	6.6673	0.0162899	0.601242	1	0	3	5	11	3
	ENSMUSG00000037474.13	Dtl	-0.221708	3.62382	6.65042	0.0164106	0.601242	490	458	506	435	467	387
	ENSMUSG00000037972.7	Snn	0.175006	4.74545	6.65788	0.0163572	0.601242	892	904	969	1124	1176	933
	ENSMUSG00000039542.16	Ncam1	0.276821	3.38964	6.72669	0.0162687	0.601242	345.99	294	400.97	512	459.94	333
	ENSMUSG00000044770.14	Scml4	0.375885	2.06186	6.64383	0.0164581	0.601242	148	104	143	206	190	135
	ENSMUSG00000046834.7	Krt1	-0.324834	12.4832	9.95811	0.0163529	0.601242	214785	226460	260367	189700	180262	203460
	ENSMUSG00000049734.9	Trex1	0.146024	6.65767	6.64494	0.0164501	0.601242	3432.56	3142.76	4000.18	4331.8	4257.05	3484.69
	ENSMUSG00000056849.6	Gm16415	2.75251	-3.14663	6.64468	0.016452	0.601242	1.39	0	0	5.58	3.34	2.97
	ENSMUSG00000068245.14	Phf11d	0.65778	6.42507	14.3621	0.0164413	0.601242	2651.35	2321.99	2331.24	4899.46	4155.74	2980.87
	ENSMUSG00000082419.3	Gm11425	0.935113	-0.993576	6.65659	0.0163664	0.601242	12.9	11.15	9.4	29.8	26.14	11.21
	ENSMUSG00000103084.1	Gm38119	-0.746712	-0.345299	6.64481	0.016451	0.601242	24	34	44	21	16	25
	ENSMUSG00000110537.1	Gm4316	-0.289681	2.63545	6.66118	0.0163335	0.601242	249.55	243.3	252.32	211.17	226.1	193.12
	ENSMUSG00000094651.2	Gal3st2	1.75627	-2.19618	6.81784	0.0165042	0.602158	3.29	0	4.74	5.57	16.54	6.76
	ENSMUSG00000024371.14	C2	0.424095	5.01013	10.499	0.0165339	0.602846	1035.85	927.05	1060.21	1732.28	1429.99	1055.13
	ENSMUSG00000031642.9	Sh3rf1	-0.175264	5.01834	6.63112	0.0165499	0.603034	1204	1171	1409	1089	1239	1118
	ENSMUSG00000090994.1	Gm6153	4.29254	-3.55568	6.71582	0.0165827	0.60383	0	0	0	1	2.01	4.02
	ENSMUSG00000049502.17	Dtx3l	0.399462	7.32227	11.1508	0.0166276	0.605069	5366.14	4692.21	5098.95	8279.84	7120.8	5406.83
	ENSMUSG00000020400.17	Tnip1	0.145823	6.5064	6.61844	0.0166422	0.6052	3121	2879	3512	3907	3893	3079
	ENSMUSG00000001419.17	Mef2d	-0.142503	7.33018	6.61593	0.0166605	0.60533	6173.24	5446.55	7015.1	6049.31	6073.32	5260.72
	ENSMUSG00000035954.10	Dock4	0.284299	3.71415	7.05471	0.0166785	0.60533	428	351	525	605	613	422
	ENSMUSG00000038671.15	Arfrp1	0.164012	5.07682	6.61431	0.0166723	0.60533	1199.24	1088.36	1207.17	1363.74	1449.59	1233.28
	ENSMUSG00000061947.10	Serpina10	1.29121	-1.85145	6.61062	0.0166993	0.605689	7	5	2	9	14	13
	ENSMUSG00000006463.13	Zdhhc24	0.314161	2.65259	6.6066	0.0167288	0.605965	222	193	195	258	256	268
	ENSMUSG00000118423.1	AC154328.1	-0.694269	-0.17375	6.60713	0.0167249	0.605965	44.11	27	43.02	23	20	29.03
	ENSMUSG00000020393.16	Kremen1	-0.146805	7.11703	6.5928	0.0168304	0.606462	5249	4948	5871	4898	5159	4866
	ENSMUSG00000024238.15	Zeb1	0.220875	5.76413	7.57091	0.0168417	0.606462	1984	1664	1864	2542	2304	1822
	ENSMUSG00000025498.15	Irf7	0.655837	7.58269	14.2711	0.0167929	0.606462	5855	5171	5297	10904	9446	6524
	ENSMUSG00000033697.16	Arhgap39	-0.207529	4.05875	6.60168	0.016765	0.606462	593	602	772	592	621	539
	ENSMUSG00000042751.14	Nmnat2	0.461811	1.04857	6.59729	0.0167972	0.606462	54	65	67	103	96	67
	ENSMUSG00000048583.16	Igf2	0.463303	6.10416	11.9866	0.0167976	0.606462	2083	2032	2242	3588.87	3324.82	2217
	ENSMUSG00000086962.4	Gm12248	-1.28862	-1.41545	6.93804	0.0168156	0.606462	8	12	31	10	4	7
	ENSMUSG00000091491.2	Vmn2r97	0.560427	0.224796	6.58988	0.0168519	0.606462	32	29	38	58	52	41
	ENSMUSG00000113687.1	Gm49703	3.00258	-3.22227	6.59195	0.0168367	0.606462	0	0	1	6	4	1
	ENSMUSG00000115389.1	Gm48936	-0.655819	0.103937	6.60136	0.0167673	0.606462	60	35	43	24	32	34
	ENSMUSG00000028434.12	Epb41l4b	-0.167576	6.07132	6.69315	0.0169249	0.608299	2557	2427	2847	2323.99	2391	2442
	ENSMUSG00000033577.18	Myo6	-0.140534	6.41246	6.58083	0.0169191	0.608299	3227	2962	3657	3099	3262	2838
	ENSMUSG00000063556.5	Gm10132	-0.37722	6.37915	10.5997	0.0169467	0.608685	3410.77	3635.48	3240.57	2668.35	3206.15	2371.83
	ENSMUSG00000096001.2	2610528A11Rik	0.443907	5.03077	10.7223	0.016976	0.609008	992	985	1063	1613	1193	1446
	ENSMUSG00000110631.1	Gm42047	0.313312	5.19809	8.81522	0.0169776	0.609008	1219.79	1180.76	1186.61	1629.89	1828.64	1187.86
	ENSMUSG00000058603.10	Rpl28-ps1	0.147346	6.58015	6.56625	0.0170278	0.610411	3076.01	3192.59	3733.98	3749.59	4106.7	3555.32
	ENSMUSG00000054662.8	Ano9	-0.21762	6.64763	7.6855	0.0171007	0.612629	3874	3713	4278	3244	3578	3646
	ENSMUSG00000014550.14	Rbsn	-0.14165	6.22872	6.5536	0.0171227	0.613023	2828	2689	3143	2759	2749	2575
	ENSMUSG00000015222.17	Map2	-0.160557	6.35181	6.56033	0.0172446	0.613638	3264	2879	3340	2792	3055	2883
	ENSMUSG00000021510.11	Zfp729a	0.242553	3.59345	6.54532	0.0171852	0.613638	409.22	387.13	413.37	577.38	501.5	406
	ENSMUSG00000022389.15	Tef	-0.140467	7.93849	6.54027	0.0172234	0.613638	9078	9287	9907	9401	9293	7854
	ENSMUSG00000027985.14	Lef1	0.397123	1.70851	6.54806	0.0171645	0.613638	82.15	105.79	117.5	126.42	160.29	128.15
	ENSMUSG00000028738.14	Tas1r2	-0.654566	0.136688	6.54162	0.0172132	0.613638	42.75	36.15	63.14	20.83	35.79	35.34
	ENSMUSG00000030427.17	Lilra6	-0.753875	-0.672164	6.54945	0.017154	0.613638	21.12	25.31	33.42	17.87	16.94	13.81
	ENSMUSG00000033361.13	Prrg3	0.20752	4.09341	6.54296	0.0172031	0.613638	606	547	582	753	731	593
	ENSMUSG00000034686.8	Prr7	-0.32258	2.37462	6.53864	0.0172358	0.613638	190	194	246	160	204	155
	ENSMUSG00000040328.16	Olfr56	0.660493	4.22018	12.1457	0.0172728	0.613638	595.28	502.05	479.69	1091.26	846.17	663.11
	ENSMUSG00000044551.13	9930012K11Rik	-0.420286	3.64391	8.53849	0.0172558	0.613638	492	479	602	340	401	459
	ENSMUSG00000044645.8	Gm7334	-0.226577	3.8772	6.53383	0.0172723	0.613638	502.26	556.53	684.68	498.86	548.06	484.87
	ENSMUSG00000057716.7	Tmem178b	0.510834	0.728747	6.53471	0.0172656	0.613638	39	55	51	70	84.31	60
	ENSMUSG00000096549.9	Prickle4	1.37297	-1.94944	6.5311	0.0172931	0.613964	5.38	5.87	1	10.84	14.43	8.44
	ENSMUSG00000052974.8	Cyp2f2	-0.207895	5.57626	7.19105	0.0173363	0.615105	1583.88	1793.86	2269.94	1774.92	1784.9	1474.88
	ENSMUSG00000037085.8	Trmt12	0.37057	2.05397	6.52391	0.0173479	0.615124	125	150	116	176	187	162
	ENSMUSG00000021678.9	F2rl1	-0.190466	4.46031	6.52017	0.0173765	0.615191	813	840	923	753	811	761
	ENSMUSG00000039202.12	Abhd2	-0.137088	6.6061	6.51785	0.0173942	0.615191	3564.01	3519	4158.08	3612.41	3768.03	3166
	ENSMUSG00000040167.16	Ikzf5	-0.159798	5.05865	6.51796	0.0173934	0.615191	1286.52	1160.1	1425.33	1257.01	1272.82	1048.05
	ENSMUSG00000096968.1	Gm26620	-1.57241	-2.29846	6.52197	0.0173627	0.615191	11.65	8.79	4.53	4.55	1.42	2.51
	ENSMUSG00000016181.9	Utp25	0.193749	4.16602	6.51521	0.0174145	0.615461	614	591	630	753	748	668
	ENSMUSG00000024134.11	Six2	0.315638	2.4087	6.51264	0.0174342	0.615461	190	149	176	245	226	192
	ENSMUSG00000046876.16	Atxn1	-0.157893	5.78236	6.51252	0.0174352	0.615461	2206.03	1876.52	2309	2180	1992.26	1742
	ENSMUSG00000022742.6	Cpox	-0.162424	5.04394	6.50949	0.0174584	0.615498	1278.61	1191.64	1359	1278.26	1176.05	1077.6
	ENSMUSG00000073888.13	Ccl27a	0.275894	2.8879	6.50993	0.017455	0.615498	238.26	241.8	250.14	343.77	313.19	259.4
	ENSMUSG00000030954.10	Gp2	-4.33091	-3.5575	6.59089	0.017496	0.616432	1	5	1	0	0	0
	ENSMUSG00000037275.14	Gemin5	0.168207	4.77527	6.50283	0.0175098	0.616524	909	920	1002	1171	1138	980
	ENSMUSG00000027243.8	Harbi1	0.285362	2.89824	6.49543	0.0175669	0.61782	245	248	239	317	298	306
	ENSMUSG00000031935.9	Med17	0.16026	5.04337	6.49518	0.0175689	0.61782	1143	1039	1244	1397	1329	1220
	ENSMUSG00000105866.1	Gm6745	5.22012	-3.1262	8.13265	0.0176034	0.618643	0	0	0	5.31	0	8.31
	ENSMUSG00000089764.2	Gm16580	0.213512	3.94623	6.47544	0.0177226	0.622435	488.29	486.29	594.35	655.42	602.86	610.78
	ENSMUSG00000042997.13	Nhlrc3	0.164152	5.08232	6.47357	0.0177372	0.622555	1121	1165	1220	1465	1396	1205
	ENSMUSG00000021302.10	Ggps1	0.16663	4.99531	6.46636	0.0177937	0.623427	1114.83	1010.89	1177.88	1380.97	1376.64	1080.94
	ENSMUSG00000025425.18	St8sia5	0.489515	1.20213	6.52144	0.0177958	0.623427	71.4	48.94	85.8	107.68	123.16	68.61
	ENSMUSG00000047109.13	Cldn14	1.53534	-1.80578	6.84106	0.017792	0.623427	4	2	7	4	16	19
	ENSMUSG00000015396.4	Cd83	-0.211027	4.11523	6.46153	0.0178317	0.623587	654	595	800	654	671	502
	ENSMUSG00000027519.10	Rab22a	-0.14105	7.4006	6.4617	0.0178304	0.623587	6644.44	6038	6806	6416	6154.1	5669.71
	ENSMUSG00000048012.19	Zfp473	0.623928	0.113355	6.45979	0.0178454	0.623587	35	23	31	53	37	51
	ENSMUSG00000116358.1	Gm49450	4.6475	-3.39651	6.9816	0.0178436	0.623587	0	0	0	2.15	7.12	0
	ENSMUSG00000040276.15	Pacsin1	0.375022	1.58299	6.45263	0.0179019	0.624782	90	86	106	131	141	106
	ENSMUSG00000042010.16	Acacb	0.214666	6.87364	7.54576	0.017913	0.624782	4203	3553	4188	5451	5105	3829
	ENSMUSG00000045136.6	Tubb2b	-0.202162	3.98139	6.45118	0.0179134	0.624782	610.32	570.12	675.53	604.28	547.74	511.23
	ENSMUSG00000036817.14	Sun1	-0.13685	6.7776	6.44745	0.017943	0.62542	4208	3856	4591	4005	4188	3671
	ENSMUSG00000115380.1	Gm46453	2.37885	-3.01268	6.44602	0.0179543	0.62542	0	1.05	1.16	5.98	5.5	2.06
	ENSMUSG00000031453.16	Rasa3	0.155898	6.76693	6.44259	0.0179815	0.625645	3716	3623	3987	4757	4798	3545
	ENSMUSG00000048478.7	Spata33	0.573377	0.098885	6.43953	0.0180059	0.625645	27	26	37	47	49	42
	ENSMUSG00000086743.2	Hnrnpa1l2-ps	4.1663	-3.60074	6.52487	0.0180012	0.625645	0	0	0	2.48	1.74	2.23
	ENSMUSG00000086998.1	Gm16033	4.37122	-3.51644	6.52701	0.0179845	0.625645	0	0	0	4.34	3.23	0
	ENSMUSG00000045268.13	Zfp691	0.352644	1.93106	6.43469	0.0180444	0.626591	130	109	124	182	153	144
	ENSMUSG00000024558.12	Mapk4	0.575152	0.190176	6.43236	0.018063	0.626845	31	26	39	53	58	37
	ENSMUSG00000112280.1	A830082N09Rik	0.497762	0.928828	6.42904	0.0180896	0.627373	67	49	52	86	101	60
	ENSMUSG00000029003.11	Mad2l2	0.24848	3.08883	6.42364	0.0181328	0.628481	273	267	311	371	355	317
	ENSMUSG00000045545.8	Krt14	-0.149508	11.6223	6.42067	0.0181567	0.628521	113244	119229	132504	114986	112898	110688
	ENSMUSG00000115041.1	Gm48939	-1.53592	-2.37881	6.42191	0.0181468	0.628521	6	11	6	3	3	2
	ENSMUSG00000079396.4	Gm3411	4.42749	-3.50077	6.56175	0.0181696	0.628576	0	0	0	0	3.8	3.97
	ENSMUSG00000014773.13	Dll1	-0.168049	4.75948	6.41046	0.0182389	0.629024	1005	955	1197	1023	1002	870
	ENSMUSG00000037933.16	Bicd2	-0.14653	7.97718	6.41165	0.0182293	0.629024	9405	8867	10930	8926	9325	8842
	ENSMUSG00000048120.16	Entpd1	0.176542	5.09732	6.41041	0.0182393	0.629024	1144	1096	1296	1575	1443	1121
	ENSMUSG00000110704.1	Gm45732	-4.44877	-3.51107	6.61163	0.0181965	0.629024	4.75	2.87	0	0	0	0
	ENSMUSG00000115568.1	Tiaf2	3.02234	-3.22071	6.41161	0.0182296	0.629024	1	0	0	4	1	6
	ENSMUSG00000038187.14	Btbd10	-0.166984	4.82652	6.40549	0.0182791	0.629539	1075	993	1237	1010	1074	946
	ENSMUSG00000073599.10	Ecscr	0.278577	3.42642	6.56686	0.0182883	0.629539	361	324	379	551	443	345
	ENSMUSG00000091510.4	Mtag2	-1.42292	-2.31369	6.40503	0.0182828	0.629539	9	7	8	3	3	3
	ENSMUSG00000012519.14	Mlkl	0.71559	4.24296	12.4149	0.018339	0.629833	564	531	468	1143	857	681
	ENSMUSG00000025499.18	Hras	-0.144173	6.48483	6.39769	0.0183423	0.629833	3290	3291	3769	3273	3244	3121
	ENSMUSG00000027597.15	Ahcy	0.154045	5.60772	6.39933	0.018329	0.629833	1689.45	1642.97	1733.54	2111.73	1967.59	1753.19
	ENSMUSG00000054717.7	Hmgb2	-0.147397	6.2424	6.39897	0.0183319	0.629833	2732.36	2823.37	3201.33	2801.19	2710.92	2625.89
	ENSMUSG00000038970.7	Lmtk2	-0.141939	6.23912	6.3899	0.0184058	0.631619	2829	2687	3213	2685	2866	2591
	ENSMUSG00000009739.17	Pou6f1	0.158482	5.11165	6.38356	0.0184575	0.632216	1167	1076	1357	1394	1456	1285
	ENSMUSG00000023026.16	Dip2b	-0.146655	6.80254	6.38219	0.0184688	0.632216	4342	4090	4456	4016	4100	3887
	ENSMUSG00000051037.15	Zfp455	0.575218	0.529052	6.3857	0.01844	0.632216	43.74	38.66	39.65	82	69.69	38.18
	ENSMUSG00000056596.8	Trnp1	-0.225009	3.91196	6.38291	0.0184628	0.632216	523	581	679	501	605	468
	ENSMUSG00000010154.7	Spire2	-0.434085	1.10981	6.37942	0.0184914	0.632323	83	86	98	64	67	72
	ENSMUSG00000046186.8	Cd109	-0.134224	7.95843	6.37571	0.0185219	0.632323	9333	9127	10173	9150	9586	8211
	ENSMUSG00000052040.10	Klf13	-0.144402	8.16143	6.37485	0.018529	0.632323	10421	10268	12466	10530	10329	9960
	ENSMUSG00000074280.6	Gm6166	-0.153939	6.43949	6.37774	0.0185052	0.632323	3252.64	3190.67	3613.83	3129.95	3053.87	3108.6
	ENSMUSG00000095041.7	AC149090.1	-0.429986	7.8681	11.2163	0.0185267	0.632323	9487.29	9670.97	10315.4	7188.31	7035.63	8196
	ENSMUSG00000002910.11	Arrdc2	0.186711	4.58764	6.37005	0.0185684	0.633225	845	774	848	1054	1057	802
	ENSMUSG00000114584.1	Gm47694	-0.317115	2.58284	6.36886	0.0185782	0.633225	281	213	230	201	223	178
	ENSMUSG00000067889.6	Sptbn2	-0.238454	8.07602	7.91936	0.0186088	0.633879	10126.6	10175.6	11880.1	8899.15	9195.05	9845.82
	ENSMUSG00000081738.1	Hmgb1-ps2	-1.84647	-2.08966	6.92078	0.018637	0.634366	14.03	13.52	4.01	3.71	5.25	0
	ENSMUSG00000109357.1	Gm45236	4.49404	-3.46949	6.63454	0.018646	0.634366	0	0	0	0	5.73	2.48
	ENSMUSG00000029228.15	Lnx1	-0.258983	3.67144	6.5038	0.018662	0.634521	444	488.48	593.51	417.87	426.4	461.54
	ENSMUSG00000020875.9	Hoxb9	-0.278452	2.72799	6.3557	0.018687	0.634755	272	255	265	230	235	210
	ENSMUSG00000049037.8	Clec4a1	0.228769	3.64604	6.35511	0.0186918	0.634755	454	372	437	502	538	486
	ENSMUSG00000001120.15	Pcbp3	0.272679	2.78426	6.3472	0.0187576	0.635001	210	208	265	294	301	255
	ENSMUSG00000030609.18	Aen	0.142857	5.66942	6.34487	0.018777	0.635001	1742	1683	1893	2140	2118	1810
	ENSMUSG00000043531.16	Sorcs1	0.540403	1.02351	6.56414	0.0187604	0.635001	68	60	48	109	101	58
	ENSMUSG00000054967.7	Zfp647	0.773892	-0.71052	6.35142	0.0187226	0.635001	15	13	17	25	36	19
	ENSMUSG00000062794.8	Zfp599	0.648693	-0.299284	6.3446	0.0187793	0.635001	20	19	26	37	34	34
	ENSMUSG00000074052.7	BC048644	1.28882	-2.02539	6.35103	0.0187257	0.635001	4	5	3	9	14	8
	ENSMUSG00000118330.1	Gm30042	-2.52714	-3.05112	6.34845	0.0187472	0.635001	7	1	5	1	0	1
	ENSMUSG00000108738.1	Gm44777	0.584704	0.286707	6.34315	0.0187914	0.635022	25.37	35.03	42.34	60.82	43.77	53.78
	ENSMUSG00000026784.14	Pdss1	-0.249792	3.44656	6.34147	0.0188054	0.635109	436.18	357.44	509.64	417.37	402.97	310.09
	ENSMUSG00000035413.8	Tmem98	0.363012	1.96562	6.33922	0.0188242	0.635357	112	107	153	191	175	128
	ENSMUSG00000024696.9	Lpxn	0.257791	3.16843	6.3355	0.0188554	0.635635	319	279	296	411	371	325
	ENSMUSG00000043467.19	Zbtb37	0.27159	3.90344	6.82288	0.0188546	0.635635	507	470.9	506.76	731.79	672.35	461.44
	ENSMUSG00000026803.17	Ttf1	0.208754	3.72181	6.33254	0.0188801	0.636083	447	423	471	563	561	478
	ENSMUSG00000071478.6	Hist1h2ad	-4.49132	-3.48331	6.63528	0.0189177	0.636961	0	1.8	6.22	0	0	0
	ENSMUSG00000038976.12	Ppp1r9b	-0.137568	6.75907	6.32637	0.018932	0.637055	3928	3894	4686	3942	4147	3621
	ENSMUSG00000073607.2	Gm10548	1.38252	-2.07946	6.32145	0.0189734	0.638062	2	2	7	13	8	9
	ENSMUSG00000018102.5	Hist1h2bc	-0.162561	5.33615	6.31873	0.0189964	0.638242	1499.14	1417.05	1787.36	1405.38	1507.4	1402.87
	ENSMUSG00000026787.3	Gad2	2.88109	-3.28303	6.31439	0.0190331	0.638242	0	0	1	4	3	3
	ENSMUSG00000032015.16	Pou2f3	-0.218828	5.2392	7.02958	0.0190058	0.638242	1477	1376	1616	1197	1369	1374
	ENSMUSG00000074482.5	Gm16589	0.333151	2.96478	6.65081	0.0190363	0.638242	284.6	245.93	220.32	379.31	342.02	264.44
	ENSMUSG00000090515.2	Krtap27-1	-0.511042	0.845353	6.31547	0.0190239	0.638242	69	63	95	41	65	57
	ENSMUSG00000057894.10	Zfp329	0.260361	2.9419	6.30957	0.0190739	0.638729	246	235	284	343	336	268
	ENSMUSG00000116720.1	Gm31641	0.945479	-1.31445	6.31041	0.0190668	0.638729	11	7	8	20	15	17
	ENSMUSG00000085020.1	2310081O03Rik	-0.495504	0.939679	6.30724	0.0190937	0.639004	87	69	85	48	57	70
	ENSMUSG00000020284.16	Cfap410	-0.222462	3.76308	6.30526	0.0191105	0.639182	560	485	558	453	496	466
	ENSMUSG00000034981.9	Parm1	0.21572	3.91758	6.29982	0.0191569	0.639189	498	429	614	638	635	565
	ENSMUSG00000071711.12	Mpst	0.153289	5.16286	6.30082	0.0191483	0.639189	1212	1161	1358	1471	1461	1343
	ENSMUSG00000078921.3	Tgtp2	0.488444	6.56581	11.8162	0.0191397	0.639189	3014.46	2602.9	3057.22	5024.98	4549.03	3093.7
	ENSMUSG00000097006.7	9530082P21Rik	0.218408	4.29391	6.39614	0.0191316	0.639189	721.07	625.18	637.67	897.69	826.57	673.02
	ENSMUSG00000020732.13	Rab37	0.255368	3.29613	6.29463	0.0192011	0.639377	325	282	376	377	471	361
	ENSMUSG00000030980.17	Knop1	0.14239	5.699	6.29619	0.0191878	0.639377	1768.01	1736.13	1923.43	2114.44	2194.17	1880.1
	ENSMUSG00000059883.16	Irak4	0.185282	4.34098	6.2924	0.0192202	0.639377	659.03	694.05	725.89	849.02	840.42	753.24
	ENSMUSG00000090053.9	Pakap	1.47613	-2.31071	6.29337	0.0192119	0.639377	4.13	2.38	1.87	6.1	9.72	8.91
	ENSMUSG00000115979.1	Gm49410	-1.19779	-1.87427	6.29683	0.0191824	0.639377	9	12	13	4	4	7
	ENSMUSG00000026826.13	Nr4a2	-0.281837	2.77995	6.28717	0.019265	0.6401	263	252	310	265	250	187
	ENSMUSG00000039497.8	Dse	0.360889	6.6242	9.90995	0.0192546	0.6401	3334	2795	3379	4929	4544	3214
	ENSMUSG00000038705.13	Gmeb2	-0.145727	5.59479	6.28318	0.0192993	0.640119	1840	1697	2053	1783	1788	1632
	ENSMUSG00000090186.6	Gm7592	0.845347	-1.05541	6.28307	0.0193002	0.640119	10.36	11.87	11.24	20.59	18.59	23
	ENSMUSG00000117653.1	Gm50009	1.31937	-2.10615	6.28418	0.0192907	0.640119	4	4	3	13	8	8
	ENSMUSG00000001865.2	Cpa3	0.261109	5.37506	7.74844	0.0193625	0.641801	1242	1474	1422	1964	1774	1416
	ENSMUSG00000037278.9	Tmem97	-0.160691	4.87862	6.27405	0.0193779	0.641928	1122.85	1063.67	1226.92	1092.9	1068.83	986.2
	ENSMUSG00000022111.9	Uchl3	-0.174581	5.19872	6.27032	0.0194101	0.642042	1303.39	1415.59	1562.07	1292.54	1303.06	1304.91
	ENSMUSG00000046438.5	Scgb2b24	-4.11009	-3.63602	6.35038	0.0194161	0.642042	2	2	2	0	0	0
	ENSMUSG00000076473.3	Trbv16	-4.11009	-3.63602	6.35038	0.0194161	0.642042	2	2	2	0	0	0
	ENSMUSG00000023067.14	Cdkn1a	-0.143549	8.09495	6.2659	0.0194484	0.642467	10022.9	9524.4	12141.7	9700.37	10564.8	9224.36
	ENSMUSG00000106178.1	Gm42987	-1.40177	-2.22027	6.26547	0.0194522	0.642467	8	11	7	5	3	2
	ENSMUSG00000114922.1	Ppifos	-4.33215	-3.55344	6.3419	0.019488	0.643267	0	4.04	3.02	0	0	0
	ENSMUSG00000017677.11	Wsb1	-0.158773	5.79174	6.25603	0.0195342	0.644111	2084	1835	2539	2126	2074	1752
	ENSMUSG00000025358.16	Cdk2	-0.161335	5.24949	6.24907	0.0195949	0.644111	1393	1416	1608	1311	1444	1312
	ENSMUSG00000033883.11	Zfp267	0.244274	3.36748	6.25509	0.0195423	0.644111	320	359	353	468	432	367
	ENSMUSG00000034675.17	Dbn1	0.229698	4.35882	6.55505	0.0195732	0.644111	633	630	818	934	941	650
	ENSMUSG00000042477.7	Tfap2e	-0.259572	3.3601	6.25021	0.0195849	0.644111	359	407	461	336	350	366
	ENSMUSG00000054277.8	Arfgap3	0.205662	4.40085	6.25868	0.0195811	0.644111	711	639	809	954	954	671
	ENSMUSG00000057596.13	Trim30d	0.699093	4.50892	12.2901	0.0195604	0.644111	720.95	559.32	621.08	1370.93	1049.44	794.82
	ENSMUSG00000074868.2	Gm6478	1.87681	-2.76506	6.24372	0.0196417	0.645266	1.14	1.36	1.65	8.32	4.54	3.93
	ENSMUSG00000022146.12	Osmr	0.154311	7.84827	6.26054	0.0196643	0.645624	8337	7488	8137	10295	9543	7824
	ENSMUSG00000037664.13	Cdkn1c	0.270172	3.18511	6.23602	0.0197093	0.646161	280	277	347	438.67	402.39	288
	ENSMUSG00000063760.9	Rnf217	-0.152264	5.61806	6.23531	0.0197156	0.646161	1888	1681	2130	1929	1769	1586
	ENSMUSG00000097313.2	Gm26569	-1.23222	-1.85098	6.23722	0.0196988	0.646161	13	8	14	3	4	8
	ENSMUSG00000072214.7	2005-09-01	-0.203271	6.89116	7.12927	0.0197293	0.646228	4332.37	4483.89	5176.01	3874.96	4312.38	4281.12
	ENSMUSG00000114836.1	Gm18517	1.28804	-2.0253	6.23212	0.0197437	0.646318	3	6	3	10	13	8
	ENSMUSG00000021906.14	Oxnad1	0.293953	2.7194	6.23027	0.01976	0.646469	236.27	178.45	231.9	258.74	301.4	256.56
	ENSMUSG00000116007.1	Gm4116	-2.28838	-2.99942	6.22764	0.0197832	0.646846	6.26	2.06	5.13	1.5	1.04	0
	ENSMUSG00000016982.6	Pom121l2	2.1447	-2.89944	6.21962	0.0198542	0.648275	0	2	1	4	6	5
	ENSMUSG00000031803.8	B3gnt3	0.297775	2.95003	6.22945	0.0198611	0.648275	267	245	243	372	353	242
	ENSMUSG00000070419.11	Cyp3a57	0.249285	3.10898	6.21874	0.019862	0.648275	290	267	305	383	382	296
	ENSMUSG00000051065.9	Mb21d2	-0.165525	5.82586	6.28432	0.0199039	0.648877	2165	1969	2477	1955	2045	2044
	ENSMUSG00000087020.1	Gm16283	1.95027	-2.7624	6.21521	0.0198933	0.648877	2	0	2	6	6	5
	ENSMUSG00000030557.17	Mef2a	-0.151129	7.41108	6.21265	0.0199161	0.648895	6696.25	5651.35	7422.12	6348.73	6791.97	5236.56
	ENSMUSG00000033538.13	Casp4	0.2575	6.1607	7.99765	0.0199802	0.649223	2530	2248	2372	3478	2854	2534
	ENSMUSG00000043008.9	Klhl6	-0.371477	2.18484	6.29653	0.0199397	0.649223	171	177	211	173	177	99
	ENSMUSG00000056718.2	Gm13199	-0.388533	1.42652	6.20495	0.0199847	0.649223	114.3	97.26	118	91	82	86
	ENSMUSG00000078941.9	Ak6	-0.138469	5.96482	6.20708	0.0199657	0.649223	2287.85	2238.13	2684.6	2324.18	2323.68	2098.01
	ENSMUSG00000083474.1	Gm15267	-1.19237	-1.68701	6.20522	0.0199823	0.649223	19.81	10.57	9.23	5.94	9.08	2.84
	ENSMUSG00000026466.16	Tor1aip1	0.232904	7.62905	7.64629	0.0200631	0.649539	6928.13	6035.05	7067.53	9452.42	8567.34	6422.74
	ENSMUSG00000038612.16	Mcl1	-0.140553	8.15657	6.20181	0.0200128	0.649539	10976	9613	12442	10847	10977	9068
	ENSMUSG00000038827.11	Abitram	0.197211	4.12792	6.19601	0.0200648	0.649539	585	559	644	724	690	695
	ENSMUSG00000041577.5	Prelp	0.289993	8.21482	8.63932	0.0200446	0.649539	9596.47	8999.44	10872	14302	13711.5	9407.9
	ENSMUSG00000051451.6	Crebzf	0.147582	5.6249	6.19606	0.0200643	0.649539	1648	1685	1810	2111	1999	1779
	ENSMUSG00000105552.1	Gm19710	-2.16053	-2.92634	6.19776	0.0200491	0.649539	5.42	3	6	2	0	1.02
	ENSMUSG00000020231.15	Dip2a	-0.143546	5.80231	6.19329	0.0200892	0.649932	2059	2005	2387	1984.99	2149	1881
	ENSMUSG00000028955.3	Vamp3	-0.134861	6.92409	6.18854	0.020132	0.649932	4689.16	4219	5094.24	4570	4500	4070
	ENSMUSG00000047084.8	Ngrn	0.189282	4.07578	6.19007	0.0201182	0.649932	581	533	615	703	720	613
	ENSMUSG00000048707.9	Tprn	-0.205437	4.59201	6.32901	0.0201007	0.649932	908	847	1091	811	837	879
	ENSMUSG00000118106.1	AC115752.1	-0.458771	1.68725	6.48607	0.0201356	0.649932	107.67	135.56	162.07	77.95	110.04	113.71
	ENSMUSG00000026582.6	Sele	-1.25461	3.22535	13.1073	0.0201489	0.649985	284	494	679	185	250	190
	ENSMUSG00000078688.11	Mup2	5.55446	-2.9118	8.66205	0.0201608	0.649989	0	0	0	11.8	5.98	0
	ENSMUSG00000026516.8	Nvl	0.145164	5.58302	6.17497	0.0202546	0.650743	1664.1	1569.54	1770.21	2056.86	1982.67	1682.67
	ENSMUSG00000027875.12	Hmgcs2	0.259945	3.60396	6.31744	0.0202369	0.650743	375	433	400	589	495	419
	ENSMUSG00000029086.15	Prom1	0.397371	1.95708	6.27687	0.0202528	0.650743	130	107	126	197	191	110
	ENSMUSG00000032231.14	Anxa2	-0.135878	9.7982	6.18137	0.0201966	0.650743	32873	32241	37585	32580	33033	30607
	ENSMUSG00000046185.10	Zfp84	0.226315	3.68602	6.17873	0.0202205	0.650743	451	417	429	541	513	512
	ENSMUSG00000050224.3	Krtap13	-0.841608	4.53591	12.9275	0.0202394	0.650743	814.61	955.91	1538.08	720.79	604.64	560.59
	ENSMUSG00000087445.1	Gm14286	-0.587458	-0.0639146	6.17046	0.0202955	0.65134	37	36	47	27	28	27
	ENSMUSG00000114694.1	Gm47995	2.25909	-3.03734	6.17033	0.0202967	0.65134	1.21	0.12	1	5.55	3.62	3.77
	ENSMUSG00000027860.15	Vangl1	-0.197833	4.75452	6.30274	0.0203156	0.651569	961	1028	1183	955	909	974
	ENSMUSG00000009900.7	Wnt3a	-0.59218	0.224987	6.16374	0.0203567	0.652508	37	58	53	29	35	37
	ENSMUSG00000017418.14	Arl5b	-0.157629	5.67344	6.15962	0.0203942	0.65258	2076	1764	2079	1845	2049	1595
	ENSMUSG00000020653.12	Klf11	-0.182487	4.66939	6.15996	0.0203912	0.65258	1016	835	1131	938	911	851
	ENSMUSG00000103081.2	Pcdhgb8	0.705348	-0.281428	6.16174	0.0203749	0.65258	15.14	22.7	26.5	41.6	26.47	39.7
	ENSMUSG00000025323.10	Sp4	0.36438	2.62044	6.52612	0.020437	0.653234	206	165	216	321	283	181
	ENSMUSG00000082878.1	Gm12583	-2.95574	-3.28127	6.15481	0.0204382	0.653234	6	2	2.01	0	0	1
	ENSMUSG00000090637.2	Gm6189	-1.24363	-2.02537	6.15335	0.0204516	0.653285	8.33	10	11.73	5.32	5.32	2.28
	ENSMUSG00000039182.6	AW209491	0.269565	3.07237	6.15163	0.0204674	0.653413	233	283	319	382	342	314
	ENSMUSG00000027330.16	Cdc25b	-0.163545	4.8816	6.14241	0.0205522	0.654101	1110	1062	1254	1038	1096	1014
	ENSMUSG00000029328.15	Hnrnpdl	-0.136093	7.89258	6.13994	0.020575	0.654101	9127.02	8080	10245	9045.01	8908.01	7779.99
	ENSMUSG00000030708.14	Dnajb13	-0.3998	1.45539	6.13903	0.0205834	0.654101	115.55	95.63	126.72	102.39	76.44	84.45
	ENSMUSG00000047804.15	Akap10	0.203802	3.82658	6.14457	0.0205323	0.654101	468	474	502	615	589	516
	ENSMUSG00000054387.13	Mdm4	0.14215	7.30715	6.14139	0.0205616	0.654101	5610	5246.99	5686	6886.98	6596.98	5436.98
	ENSMUSG00000095042.1	Gm12537	5.14395	-3.14936	7.6631	0.020557	0.654101	0	0	0	10.1	3.15	0
	ENSMUSG00000095589.2	Ighv1-55	-1.89443	-2.63676	6.14312	0.0205456	0.654101	5	5	9	1	4	0
	ENSMUSG00000099041.1	Gm28035	0.584711	2.09818	7.73223	0.0205763	0.654101	156.61	97.75	116.65	251.51	185.65	141.7
	ENSMUSG00000034683.12	Ppp1r1c	-0.901197	-1.25049	6.13654	0.0206064	0.654198	20	14	19	8	10	11
	ENSMUSG00000041147.10	Brca2	0.174968	4.73252	6.13599	0.0206115	0.654198	912	870	959	1085	1053	1049
	ENSMUSG00000096850.1	Gm21748	1.93896	-0.987537	8.65501	0.0206219	0.654198	0	6.8	13.42	36.52	26.2	18.26
	ENSMUSG00000022285.17	Ywhaz	-0.147395	9.22702	6.13056	0.0206617	0.655087	21865.8	20761.3	26960.9	21584.5	22081.2	20784.5
	ENSMUSG00000062373.8	Tmem65	-0.149106	7.22743	6.12276	0.0207342	0.657009	5811	4885	6721	5642	5597	4907
	ENSMUSG00000035545.13	Leng8	-0.133264	8.59516	6.117	0.0207878	0.658332	14645.1	13457	16507.1	14420.4	14436	13017.6
	ENSMUSG00000108112.1	Gm45193	-0.768727	-0.615973	6.1152	0.0208046	0.658489	35.5	21.53	26.35	23.18	15.99	11.44
	ENSMUSG00000019990.15	Pde7b	0.368562	3.2833	7.1242	0.0208349	0.659071	324	276	330	501	463	286
	ENSMUSG00000051721.6	Wdcp	0.409022	2.41624	6.6938	0.0208569	0.65939	188	139	172	261	274	155
	ENSMUSG00000032536.12	Trak1	-0.131526	7.36266	6.10811	0.0208709	0.659457	6280	5750	6930	6238	6136	5466
	ENSMUSG00000029229.8	Chic2	-0.152598	5.58084	6.10635	0.0208875	0.659604	1792	1633	2135	1791	1730	1618
	ENSMUSG00000085482.1	A230083N12Rik	-4.10551	-3.63623	6.18098	0.0209094	0.65992	1	2	3	0	0	0
	ENSMUSG00000030339.7	Ltbr	0.148289	5.60451	6.10261	0.0209225	0.659959	1646	1569	1866	2137	2023	1661
	ENSMUSG00000034858.16	Fam214a	-0.154098	5.31499	6.09617	0.0209832	0.660749	1432	1477	1705	1424	1483	1362
	ENSMUSG00000038994.6	Hils1	1.2945	-2.02655	6.09675	0.0209778	0.660749	3	3	6	15	10	6
	ENSMUSG00000041609.16	Bicdl1	-0.180682	5.57976	6.3539	0.0210367	0.660749	1790	1704	2106	1600	1725	1739
	ENSMUSG00000087477.1	Gm13822	0.861389	-0.961297	6.09492	0.020995	0.660749	11	7	18	21	20	26
	ENSMUSG00000089706.7	B230216N24Rik	-0.567447	0.516844	6.09043	0.0210374	0.660749	59	47	76	46	56	25
	ENSMUSG00000095210.2	Ighv5-9-1	-4.1084	-3.6361	6.16649	0.021043	0.660749	3	1	2	0	0	0
	ENSMUSG00000105909.1	Gm43189	-4.1084	-3.6361	6.16649	0.021043	0.660749	3	1	2	0	0	0
	ENSMUSG00000108115.1	Gm7039	-4.1084	-3.6361	6.16649	0.021043	0.660749	3	1	2	0	0	0
	ENSMUSG00000002475.16	Abhd3	0.338025	2.04505	6.08332	0.0211047	0.662313	133	108	156	193	185	140
	ENSMUSG00000020697.16	Lig3	0.149215	5.48226	6.07457	0.021188	0.664259	1547.62	1463.54	1647.59	1757.45	1873.04	1695.77
	ENSMUSG00000047216.8	Cdh19	0.390738	2.28506	6.41072	0.0212105	0.664259	170	125	164	262	216	147
	ENSMUSG00000073408.2	Mucl3	-4.11179	-3.63594	6.14666	0.0212273	0.664259	1	3	2	0	0	0
	ENSMUSG00000076652.4	Ighv7-3	-2.43815	-3.10493	6.07086	0.0212233	0.664259	4	6	2	1	1	0
	ENSMUSG00000079043.3	Fastkd5	0.230509	3.44747	6.06934	0.0212378	0.664259	369.64	365.6	361	463.82	452	414.74
	ENSMUSG00000091736.3	Yy2	0.410559	1.67599	6.07107	0.0212386	0.664259	109.4	67.78	120.85	159.06	134.47	114.17
	ENSMUSG00000020374.16	Rasgef1c	0.557282	0.227382	6.06605	0.0212693	0.664844	39	31	29	57	48	46
	ENSMUSG00000003341.9	Atp8b3	-2.13273	-2.94787	6.05818	0.0213448	0.665774	5	4	5	0	2	1
	ENSMUSG00000024395.9	Lims2	-0.227971	3.70487	6.05419	0.0213832	0.665774	456.98	471.96	620	447	517	397.96
	ENSMUSG00000029270.10	Dipk1a	0.189854	4.11229	6.05608	0.021365	0.665774	592.89	556.04	623.18	760.48	727.57	603.66
	ENSMUSG00000032067.6	Pts	0.180054	4.55859	6.05856	0.0213411	0.665774	812	799	809	1009	950	877
	ENSMUSG00000041219.14	Arhgap11a	-0.158299	5.0663	6.05296	0.021395	0.665774	1264	1210	1413	1295	1172	1122
	ENSMUSG00000044966.4	Fbxo48	0.867617	-1.13518	6.05294	0.0213952	0.665774	8	12	11	24	21	14
	ENSMUSG00000113894.1	Gm48838	-0.557615	0.150039	6.05946	0.0213325	0.665774	48	41	50	35	28	34
	ENSMUSG00000116113.1	Gm49545	-4.11468	-3.63581	6.13248	0.0213601	0.665774	3	2	1	0	0	0
	ENSMUSG00000039005.13	Tlr4	0.246579	3.83233	6.22863	0.0214186	0.66601	466	432	533	691	630	440
	ENSMUSG00000094561.1	Ighv1-22	-3.08846	-3.22099	6.05333	0.0214268	0.66601	0	6	5	1	0	0
	ENSMUSG00000036403.15	Cep135	0.284996	2.48695	6.04764	0.0214463	0.666044	188	175	187	234	249	210
	ENSMUSG00000082467.1	Gm6743	-4.11639	-3.63573	6.12274	0.021452	0.666044	2	3	1	0	0	0
	ENSMUSG00000031706.7	Rfx1	-0.255469	3.97485	6.43341	0.0214688	0.666192	537	547	807	558	546	517
	ENSMUSG00000052248.16	Zeb2os	0.390868	1.5474	6.04162	0.0215046	0.666558	95.35	86.94	90.2	151.49	114.39	104.41
	ENSMUSG00000059866.13	Tnip2	0.14615	5.78485	6.04233	0.0214977	0.666558	1894	1884	1966	2285	2230	2053
	ENSMUSG00000001175.15	Calm1	-0.133258	8.26064	6.03961	0.0215241	0.666638	11405	10881	13080	11061	11766	10376
	ENSMUSG00000018405.7	Mrm1	0.212802	3.63587	6.03677	0.0215516	0.666638	412	406	443	502	521	484
	ENSMUSG00000019564.12	Arid3a	-0.250071	3.47629	6.03392	0.0215793	0.666638	439	383	507	356	384	404
	ENSMUSG00000043924.16	Ncmap	0.413369	2.93258	7.11081	0.0215347	0.666638	240	229	245	416	355	221
	ENSMUSG00000045333.15	Zfp423	0.210402	4.13383	6.03486	0.0215702	0.666638	554	547	690	819	752	572
	ENSMUSG00000096336.2	Igkv1-135	-1.30111	-1.90029	6.03474	0.0215714	0.666638	7	10	17	3	9	2
	ENSMUSG00000028362.2	Tnfsf8	0.32681	2.04443	6.0307	0.0216107	0.666857	127	119	152	194	182	140
	ENSMUSG00000070729.5	Gm12966	-0.151389	5.58847	6.03115	0.0216063	0.666857	1880.03	1634.33	2065.48	1726.83	1787.61	1651.26
	ENSMUSG00000109336.1	Samd4b	-0.143887	6.6096	6.02948	0.0216225	0.666857	3533	3418	4366	3573	3577	3366
	ENSMUSG00000021120.11	Pigh	0.269026	2.91833	6.02567	0.0216598	0.667634	226.27	251.31	271.45	290.8	342.58	297.34
	ENSMUSG00000026439.14	Rbbp5	0.162307	4.8293	6.02137	0.0217018	0.668558	1004.96	927	1011.97	1164.98	1197.99	1041.97
	ENSMUSG00000026199.17	Ankzf1	0.180341	5.09461	6.10482	0.0217163	0.668573	1211.27	1161.77	1133.82	1420.97	1361.21	1325.9
	ENSMUSG00000046111.17	Cep295	0.186086	4.90114	6.09629	0.0217264	0.668573	1070.88	1008.89	979.41	1284.91	1307.66	1024.8
	ENSMUSG00000051354.14	Samd3	1.23976	-1.97395	6.01717	0.021743	0.668711	2	4	7	10	11	11
	ENSMUSG00000066258.13	Trim12a	0.69834	4.35345	11.5364	0.0217594	0.668846	619.57	529.44	557.09	1235.55	984.12	671.01
	ENSMUSG00000024042.7	Sik1	-0.241161	7.59504	7.58383	0.0218642	0.669647	7037	6956	9163	6184	7131	6734
	ENSMUSG00000029832.16	Nfe2l3	-0.214417	4.32611	6.13044	0.0218587	0.669647	732	824	803	686	698	712
	ENSMUSG00000033510.14	Otud7a	-0.659196	-0.280641	6.00559	0.0218569	0.669647	26	42	36	24	23	21
	ENSMUSG00000037106.8	Fer1l6	0.917683	-1.06818	6.01117	0.0218019	0.669647	12	6	14	26	26	11
	ENSMUSG00000042121.16	Ssh1	-0.203421	3.89543	6.0058	0.0218548	0.669647	545	574	628	545	582	444
	ENSMUSG00000071984.10	Fndc1	0.169348	7.94176	6.34001	0.0218345	0.669647	8185	7650	9713	11068	10733	7931
	ENSMUSG00000081207.4	Gm13775	1.3912	-2.16323	6.00425	0.0218701	0.669647	3	5	2	13	10	5
	ENSMUSG00000026482.13	Rgl1	0.145591	6.09016	5.99762	0.0219357	0.671284	2399	2201	2514	2973	2914	2268
	ENSMUSG00000030303.15	Far2	0.150555	8.58846	5.99808	0.0219486	0.671309	13132.4	13262.4	13663.2	16879.7	16528.3	12791.8
	ENSMUSG00000032068.14	Plet1	-0.207786	3.98489	5.99485	0.0219631	0.671382	555.8	591.86	719	568	548	543.96
	ENSMUSG00000022103.10	Gfra2	0.241514	3.33128	5.99139	0.0219974	0.671691	306	301	407	426	409	395
	ENSMUSG00000039501.14	Znfx1	0.29081	8.07256	8.39752	0.0219918	0.671691	9401	8058	9168	13135	11935	8800
	ENSMUSG00000038179.13	Slamf7	0.292982	3.11249	6.12796	0.0220218	0.672066	311	226.74	314.24	428.3	364.98	286.29
	ENSMUSG00000024339.12	Tap2	0.25592	6.23582	7.73193	0.0220451	0.672405	2613.15	2343.54	2590.16	3702.85	3162.26	2496.3
	ENSMUSG00000033885.15	Pxk	0.144694	6.05397	5.98512	0.0220598	0.672485	2298	2209	2428	2919	2796	2232
	ENSMUSG00000000794.9	Kcnn3	0.406071	3.33479	7.41488	0.0220906	0.672682	358	270	321	528	470	311
	ENSMUSG00000110575.1	6330537M06Rik	-0.318889	2.21228	5.98304	0.0220806	0.672682	193.09	151	218.08	150	167	146
	ENSMUSG00000024030.7	Abcg1	-0.216164	4.09827	5.98627	0.0221573	0.673604	664	615	744	582	572	631
	ENSMUSG00000061132.13	Blnk	-0.201919	4.18699	5.97594	0.0221515	0.673604	700	623	823	616	656	641
	ENSMUSG00000076523.2	Igkv15-103	0.848388	-1.06676	5.97581	0.0221528	0.673604	10	11	12	27	22	13
	ENSMUSG00000003528.15	Slc25a1	0.148086	6.45071	5.96616	0.0222497	0.675911	2811	3133	3164	3617	3594	3225
	ENSMUSG00000023206.16	Il15ra	0.157805	5.97411	6.00548	0.0222665	0.675911	2244	2056	2225	2846	2597	2109
	ENSMUSG00000104574.1	Gm42836	-1.54978	-2.42947	5.96416	0.0222698	0.675911	6.56	10.73	4.66	1.79	3.71	2.06
	ENSMUSG00000115092.1	E130202H07Rik	1.81026	-2.63676	5.96154	0.0222962	0.676344	3	0	2	6	7	6
	ENSMUSG00000029868.13	Trpv6	-0.237304	3.29422	5.95512	0.022361	0.677567	392	363	407	328	349	338
	ENSMUSG00000105328.1	Gm43180	-0.694053	-0.473462	5.95519	0.0223604	0.677567	30	31	30	25	15	18
	ENSMUSG00000044562.12	Rasip1	0.195549	4.14751	5.95	0.022413	0.678769	549.41	564.98	703.69	770.69	772.97	605.87
	ENSMUSG00000021963.17	Sap18	0.149657	5.45129	5.94562	0.0224574	0.679745	1393.6	1500.62	1667.41	1836.69	1850.69	1542.39
	ENSMUSG00000089736.2	Tgfbr3l	-0.214773	3.64773	5.94414	0.0224724	0.679827	443.66	471.18	564.29	440.31	481.64	392.31
	ENSMUSG00000017631.19	Abr	-0.138369	6.09081	5.94291	0.022485	0.679837	2558	2379	2935	2421	2634	2306
	ENSMUSG00000034484.8	Snx2	0.165631	7.08992	6.21242	0.0225122	0.679841	4744.4	4322.08	5070.42	6325.57	5650.1	4460.57
	ENSMUSG00000071076.6	Jund	-0.292109	7.1365	8.34907	0.0225243	0.679841	4742.58	5402.89	6986.46	4671.63	5245.34	4446.73
	ENSMUSG00000097407.1	4933408J17Rik	-0.854377	-1.06924	5.94107	0.0225037	0.679841	15.1	22.21	23.09	11.03	9.05	14.06
	ENSMUSG00000116802.1	Gm5165	0.325019	2.53789	5.96296	0.0225342	0.679841	185	198	177	220	242	261
	ENSMUSG00000028082.14	Sh3d19	-0.131956	6.28832	5.9355	0.0225605	0.679896	2951	2835	3203	2852	3023	2594
	ENSMUSG00000070532.5	Ccdc190	2.07567	-2.8581	5.93599	0.0225555	0.679896	1.27	2	0	5	7.61	3
	ENSMUSG00000021481.11	Zfp346	0.192394	4.28039	5.92736	0.0226439	0.68155	642	663	682	842	865	650
	ENSMUSG00000035354.9	Uvrag	-0.1489	5.45071	5.92654	0.0226523	0.68155	1534.5	1631.97	1896.85	1624.16	1660.49	1425.04
	ENSMUSG00000117980.1	Gm30571	0.425867	0.924441	5.92759	0.0226415	0.68155	58	54	61	83	83	74
	ENSMUSG00000112891.1	Gm47391	0.861141	-1.10475	5.92277	0.0226911	0.682345	9	12	11	20	16	24
	ENSMUSG00000002804.4	Nudt14	-0.239957	3.13091	5.91872	0.0227327	0.682565	345	327	366	299	315	292
	ENSMUSG00000037395.15	Rcor3	-0.189624	4.4589	5.91852	0.0227348	0.682565	830.55	734	1021.2	817.79	858	660.59
	ENSMUSG00000041134.15	Cyyr1	0.280709	4.78024	7.26341	0.02276	0.682565	955.26	881.72	879.33	1323.46	1229.61	885.51
	ENSMUSG00000061689.15	Dlgap4	-0.128029	7.43025	5.91696	0.0227509	0.682565	6379	6268	7182	6474	6672	5596
	ENSMUSG00000079659.5	Tmem243	0.216909	4.07071	5.93337	0.022739	0.682565	604.45	514.13	585.29	774.48	742.14	539.76
	ENSMUSG00000006369.14	Fbln1	0.144112	6.74917	5.90872	0.0228361	0.682958	3346	3580	4349	4525	4499	3817
	ENSMUSG00000025491.14	Ifitm1	0.271139	3.39461	6.06219	0.022847	0.682958	351	341.02	349	520	462.05	326
	ENSMUSG00000025912.16	Mybl1	-0.357633	1.65399	5.90774	0.0228462	0.682958	118	114	152	112	111	86
	ENSMUSG00000037813.13	D630003M21Rik	0.434159	1.28346	5.90881	0.0228351	0.682958	68	55	101	102	122	87
	ENSMUSG00000041959.14	S100a10	-0.13076	7.93018	5.91314	0.0227903	0.682958	9268	8903	9866	9033	9156	8240
	ENSMUSG00000048285.9	Frmd6	-0.137774	7.26075	5.90978	0.022825	0.682958	5629.58	5541.32	6530.9	5371.86	6124.03	5092.25
	ENSMUSG00000031441.15	Atp11a	0.147465	7.09555	5.90468	0.0228779	0.683513	4900	4317	5066	6075.83	5779	4536.99
	ENSMUSG00000024477.4	Pggt1b	0.13798	5.78059	5.9012	0.022914	0.683949	1941	1766	2050	2303	2311	1933
	ENSMUSG00000029314.14	Gpat3	-0.272872	2.79876	5.90023	0.0229242	0.683949	253.57	241.72	340.83	243.88	252.73	214.47
	ENSMUSG00000078813.3	Leng1	0.228596	3.35726	5.89971	0.0229295	0.683949	316.35	349.44	366.38	424.32	449.09	376.93
	ENSMUSG00000063838.6	Cdc42ep5	-0.22702	3.53243	5.89627	0.0229653	0.684281	408	450	511	395	411	397
	ENSMUSG00000105395.1	Gm42672	2.87661	-3.28327	5.89723	0.0229554	0.684281	0	0	1	6	2	2
	ENSMUSG00000108211.1	Gm44130	-1.21609	-1.94732	5.88877	0.0230436	0.686245	10	11	11	2	7	5
	ENSMUSG00000025223.15	Ldb1	-0.143989	7.90607	5.88154	0.0231195	0.687782	8655	8726	10379	8305	9117	8398
	ENSMUSG00000044788.10	Fads6	0.179169	4.27936	5.88073	0.0231279	0.687782	641	626	734	769	829	736
	ENSMUSG00000097804.1	Gm16685	0.461909	1.52539	6.13048	0.0231325	0.687782	109	78	73	155	121	97
	ENSMUSG00000021803.10	Cdhr1	0.641977	4.2088	10.6203	0.0231481	0.687834	483	583	511	890	713	929
	ENSMUSG00000026102.9	Inpp1	0.374629	4.57074	8.25025	0.0231686	0.687834	820	717	728	1187	1114	762
	ENSMUSG00000032698.15	Lmo2	0.190737	4.50285	5.87659	0.0231715	0.687834	791	706	829	1001	1026	727
	ENSMUSG00000001998.15	Ap4e1	0.194409	4.26866	5.87016	0.0232393	0.688909	650	643	677	852	857	632
	ENSMUSG00000006575.14	Rundc3a	-0.283964	2.68408	5.86962	0.023245	0.688909	244	258	268	220	207	224
	ENSMUSG00000102892.1	Gm37854	1.28372	-1.94685	5.86992	0.0232418	0.688909	5	5	3	6	11	16
	ENSMUSG00000029676.15	Pot1a	0.222483	3.71982	5.86726	0.0232699	0.688911	413	460	457	599	568	444
	ENSMUSG00000032085.5	Tagln	0.195048	5.0876	6.19994	0.0232691	0.688911	1121.11	1118.81	1243.79	1581.14	1489.07	1072.32
	ENSMUSG00000022469.17	Rapgef3	-0.267719	2.71416	5.86164	0.0233294	0.6892	243.92	251	288.84	217	248.67	205.84
	ENSMUSG00000024645.5	Timm21	0.178765	4.3604	5.86357	0.023309	0.6892	706	674	733	866	821	781
	ENSMUSG00000029826.14	Zc3hav1	0.18206	7.98222	6.43268	0.0233282	0.6892	9066	7967	9020	11781	10548	8347
	ENSMUSG00000102776.1	Gm38162	0.939186	-1.45141	5.86471	0.0232969	0.6892	8.43	6.01	8.93	16.01	15.96	14.54
	ENSMUSG00000028007.13	Snx7	-0.171662	4.66624	5.8585	0.0233628	0.689452	966	940	1048	864	1010	834
	ENSMUSG00000060703.12	Cd302	0.180583	5.33672	6.07172	0.0233586	0.689452	1362	1332	1468	1881	1721	1296
	ENSMUSG00000049382.10	Krt8	0.581424	0.115274	5.85713	0.0233773	0.689512	32	29	29.58	36.31	51.48	51.83
	ENSMUSG00000066829.7	Zfp810	0.331667	2.72497	6.06648	0.0234456	0.690424	190	249	196	296	309	228
	ENSMUSG00000075325.3	Gm13582	4.06125	-3.63666	5.92236	0.0234423	0.690424	0	0	0	2	3	1
	ENSMUSG00000105387.1	Gm29681	4.06125	-3.63666	5.92236	0.0234423	0.690424	0	0	0	2	3	1
	ENSMUSG00000014426.9	Map3k4	-0.147345	5.43173	5.84874	0.0234667	0.690499	1616	1533	1846.02	1518	1657.91	1467
	ENSMUSG00000027634.14	Ndrg3	0.207541	5.9019	6.69773	0.023473	0.690499	2066.97	1918	2112	2735	2696	1891
	ENSMUSG00000040649.15	Rimklb	0.751152	-0.721357	5.84615	0.0234944	0.69076	15	14	16	31	32	16
	ENSMUSG00000018398.18	2008-09-01	-0.152588	7.49177	5.90814	0.0236292	0.693619	6687	6536	7650	6145	6628	6506
	ENSMUSG00000104443.1	4932442E05Rik	-0.704079	-0.269185	5.83468	0.0236173	0.693619	24.69	34.34	47.52	19.25	33.06	15.08
	ENSMUSG00000117935.1	Gm8717	0.513495	0.434363	5.83494	0.0236145	0.693619	38.41	29.69	49.89	59.87	55.53	57.38
	ENSMUSG00000003623.4	Crot	0.179619	4.49832	5.82652	0.0237052	0.694277	780	702	848	1015	962	753.95
	ENSMUSG00000019254.16	Ppp1r12c	-0.129299	6.48623	5.81891	0.0237875	0.694277	3305	3191	3824	3321	3424	2979
	ENSMUSG00000022575.5	Gsdmd	0.491375	4.44753	9.38902	0.0237077	0.694277	741	572	677	1170	1036	706
	ENSMUSG00000024308.15	Tapbp	0.229609	8.29844	7.17975	0.0237939	0.694277	10863.7	9873.67	11139.2	15156.9	13510.4	10174.6
	ENSMUSG00000025353.5	Ormdl2	-0.192703	4.94994	6.06487	0.0236698	0.694277	1170.25	1153.2	1299.4	1012.26	1108.67	1133.94
	ENSMUSG00000027601.13	Mtfr1	-0.150598	5.20214	5.82023	0.0237732	0.694277	1407	1267	1593	1374	1341	1240
	ENSMUSG00000031584.16	Gsr	0.170043	5.2764	5.86281	0.0237711	0.694277	1327	1236	1449	1744	1702	1236
	ENSMUSG00000032998.16	Foxj3	-0.131687	6.22987	5.8266	0.0237043	0.694277	2865	2622	3156	2766	2829	2532
	ENSMUSG00000046404.5	Yod1	-0.294269	5.97908	8.0657	0.0238019	0.694277	2559	2277	2820	2038	2054	2295
	ENSMUSG00000051343.11	Rab11fip5	-0.147537	6.54165	5.82402	0.0237322	0.694277	3241	3295	4283	3422	3484	3125
	ENSMUSG00000076615.4	Ighg3	-2.35125	-2.00113	7.24224	0.0237287	0.694277	8	2	27	1	3	3
	ENSMUSG00000103181.1	A330069K06Rik	4.06684	-3.6364	5.89166	0.023765	0.694277	0	0	0	1	3	2
	ENSMUSG00000017868.16	Sgk2	1.63954	-2.55821	5.8112	0.0238712	0.694469	3	1	2	4	8	8
	ENSMUSG00000024511.15	Rab27b	-0.153243	5.56156	5.81156	0.0238673	0.694469	1832	1621	2026	1664	1736	1661
	ENSMUSG00000037482.2	Erv3	1.49502	-2.48461	5.81454	0.0238349	0.694469	2	2	3	6	8	7
	ENSMUSG00000039713.17	Plekhg5	-0.169692	5.29921	5.85674	0.0238689	0.694469	1351	1439	1809	1372	1472	1353
	ENSMUSG00000054434.14	Tmem120b	-0.231965	3.75962	5.82983	0.0238395	0.694469	533.16	453.56	623.92	432.96	488.76	482.55
	ENSMUSG00000075269.5	Bex6	2.86576	-3.28336	5.8073	0.0239137	0.695341	1	0	0	5	4	1
	ENSMUSG00000033282.14	Rpgrip1l	-0.261866	3.23448	5.80369	0.023953	0.69612	341	315	475	307	360	300
	ENSMUSG00000108255.1	Gm16499	0.656686	-0.279986	5.79989	0.0239946	0.696964	23.8	23.96	17.67	32	35.01	39.65
	ENSMUSG00000048652.12	Samd13	0.863764	-1.17704	5.79858	0.024009	0.697014	9	13	8	20	21	16
	ENSMUSG00000041696.14	Rasl12	0.327824	1.99076	5.7971	0.0240251	0.697119	126	113	144	192	170	135
	ENSMUSG00000034634.7	Ly6d	-0.151927	10.1575	5.85755	0.0240556	0.697612	42381	41978	48025	39607	41297	41451
	ENSMUSG00000069581.12	Tspear	-0.539647	0.189416	5.79326	0.0240673	0.697612	45	48	49	30	42	29
	ENSMUSG00000018169.12	Mfng	-0.3783	1.36524	5.78145	0.0241973	0.697617	102	91	122	90	91	69
	ENSMUSG00000023330.12	Dtwd1	0.263235	2.76866	5.78258	0.0241849	0.697617	237	205	234	290	283	264
	ENSMUSG00000027221.5	Chst1	-0.366777	1.6839	5.78293	0.024181	0.697617	109	118	167	111	111	92
	ENSMUSG00000033825.10	Tpsb2	0.211471	4.95827	6.2966	0.0242017	0.697617	914	1056	1200	1453	1306	1040
	ENSMUSG00000062785.14	Kcnc3	-0.288667	2.28051	5.78067	0.024206	0.697617	187.54	180.5	214.62	171	173	148.05
	ENSMUSG00000079260.3	Tmppe	0.242251	3.04408	5.79041	0.0240986	0.697617	254.9	269.43	302.16	337.56	358.18	312.69
	ENSMUSG00000085545.1	Gm13553	4.0729	-3.63612	5.85934	0.0241103	0.697617	0	0	0	1	2	3
	ENSMUSG00000090381.2	Gm6158	-0.189651	4.00068	5.78254	0.0241853	0.697617	613.23	602	654.92	566.93	589.43	535.65
	ENSMUSG00000094350.1	Gm10931	4.07336	-3.6361	5.85711	0.0241342	0.697617	0	0	0	2	1	3
	ENSMUSG00000105695.1	Gm43327	1.13925	-1.45084	5.87617	0.0241254	0.697617	10	7	4	22	21	6
	ENSMUSG00000112477.1	Gm48657	-4.11298	-3.63589	5.85808	0.0241239	0.697617	4	1	1	0	0	0
	ENSMUSG00000000247.11	Lhx2	0.230659	3.5955	5.77905	0.0242238	0.69777	353	367	505	493	529	454
	ENSMUSG00000022704.16	Qtrt2	0.178324	4.49164	5.77485	0.0242703	0.698744	797	701	820	1005	886	817
	ENSMUSG00000106498.1	Gm43032	-1.73115	-2.55816	5.7681	0.0243452	0.700537	9	5	6	2	4	0
	ENSMUSG00000090069.2	E430024P14Rik	0.557242	0.441254	5.76641	0.024364	0.700715	48.54	27.78	39.61	76.04	49.75	50.53
	ENSMUSG00000027358.6	Bmp2	-0.175278	4.73188	5.7624	0.0244087	0.70091	921	975	1210	924	1031	875
	ENSMUSG00000048424.17	Ranbp3l	0.933727	-1.13642	5.76327	0.0243989	0.70091	9	10	11	16	33	11
	ENSMUSG00000049323.8	Smcr8	0.147683	5.4129	5.7626	0.0244064	0.70091	1522.4	1403	1511.08	1781	1795.41	1511
	ENSMUSG00000023913.17	Pla2g7	0.204019	4.18665	5.75847	0.0244526	0.70173	615.84	553.96	690.88	859.97	768.91	589.96
	ENSMUSG00000031931.4	Ankrd49	0.161564	4.79237	5.75757	0.0244626	0.70173	933	881	1064	1160	1095	1057
	ENSMUSG00000003585.13	Sec14l2	-0.218587	3.64882	5.75507	0.0244905	0.70202	437	478	567	433	448	428
	ENSMUSG00000069727.5	Zfp975	0.425932	1.16248	5.7544	0.024498	0.70202	59.05	73.8	71.68	115.92	95.41	73.99
	ENSMUSG00000024131.8	Slc3a1	-1.13885	-1.8589	5.75188	0.0245263	0.702156	10.91	13.48	9.47	6.43	6.65	2.73
	ENSMUSG00000079339.7	Ifit1bl1	0.794936	4.44351	11.4709	0.0245282	0.702156	644.93	461	645	1330.81	1124	705
	ENSMUSG00000035735.10	Dagla	-0.296975	2.34756	5.74901	0.0245585	0.702662	179	195	239	179	191	145
	ENSMUSG00000116924.1	4933401D09Rik	2.87134	-3.28355	5.74607	0.0245915	0.703244	0	0	1	6	3	1
	ENSMUSG00000052135.8	Foxo6	-0.335405	1.89837	5.74462	0.0246078	0.703347	151	136	165	134	141	96
	ENSMUSG00000032280.16	Tle3	-0.13324	7.48025	5.73989	0.0246611	0.704507	6366	6499	7727	6562	6667	6091
	ENSMUSG00000048200.12	Cracr2b	0.201343	3.67958	5.73678	0.0246962	0.705146	440.54	398.17	468.31	548.17	532.49	470.29
	ENSMUSG00000020090.7	Npffr1	2.88529	-3.28233	5.73132	0.024758	0.705208	1	0	0	1	4	5
	ENSMUSG00000030208.15	Emp1	-0.131435	10.0424	5.72983	0.0247749	0.705208	40539	35846	45261	40155	39880	34405
	ENSMUSG00000031762.7	Mt2	0.140927	11.0993	5.73242	0.0247456	0.705208	78219.6	72270.7	78865.9	97378.2	88569	76022
	ENSMUSG00000033615.9	Cplx1	-0.963434	-1.39588	5.72872	0.0247875	0.705208	11	16	21	7	7	11
	ENSMUSG00000040606.13	Kazn	-0.169643	6.31839	6.06343	0.0247605	0.705208	3189	2758	3357	2683	2942	2868
	ENSMUSG00000044134.9	Pheta1	0.182567	4.13644	5.73299	0.0247391	0.705208	569	592	646	715	747	655
	ENSMUSG00000068758.8	Il3ra	0.253192	2.93298	5.72911	0.0247831	0.705208	237	234	292	347	327	265
	ENSMUSG00000039385.5	Cdh6	0.34627	1.86346	5.72513	0.0248282	0.705424	107	115	125	184	149	124
	ENSMUSG00000072672.10	Duxbl3	-3.17455	-0.189036	11.2332	0.0248307	0.705424	88.27	11.96	65.6	3.38	8.17	6.88
	ENSMUSG00000097973.1	Gm4929	4.27449	-3.55855	5.84278	0.0248332	0.705424	0	0	0	0	5	2
	ENSMUSG00000034248.7	Slc25a37	-0.133446	6.01237	5.71859	0.0249027	0.70629	2525.92	2261.87	2641.79	2381.82	2462.51	2144.76
	ENSMUSG00000046318.16	Ccbe1	0.273596	3.12558	5.74189	0.0249147	0.70629	270	290	303	432	383	270
	ENSMUSG00000085337.1	Gm15964	-0.282833	2.58477	5.71969	0.0248902	0.70629	218.88	255.7	242.47	208.51	213.16	188.24
	ENSMUSG00000089635.1	Gm16559	0.563131	0.0675041	5.72012	0.0248853	0.70629	26	29	33	52	51.02	32
	ENSMUSG00000017446.14	C1qtnf1	0.14675	6.31883	5.71185	0.0249797	0.706327	2584.6	2626.01	3139.76	3566.37	3343.61	2651.26
	ENSMUSG00000026416.12	Il20	-0.790906	-1.07751	5.71197	0.0249783	0.706327	18	19	22	13	11	11
	ENSMUSG00000026457.14	Adipor1	-0.134582	7.85522	5.71388	0.0249565	0.706327	8892	8116	9689	8145	9019	7885
	ENSMUSG00000034463.4	Scara3	0.143363	7.78075	5.71373	0.0249582	0.706327	7230	7167	8647	9187	9876	7272
	ENSMUSG00000035314.10	Gdpd5	-0.22153	3.61299	5.71198	0.0249781	0.706327	424	444	582	429	445	403
	ENSMUSG00000058402.14	Zfp420	0.396126	1.41791	5.70796	0.0250242	0.707224	80	62	108	121	119	98
	ENSMUSG00000030967.15	Zranb1	-0.128344	6.91944	5.70282	0.0250832	0.707989	4638	4210	5080	4467	4621	4045
	ENSMUSG00000105345.1	BC030343	0.74611	-0.537685	5.70416	0.0250678	0.707989	12	23	17	31	24	35
	ENSMUSG00000111713.1	Gm20234	1.72183	-2.67753	5.70226	0.0250896	0.707989	3	1	1	7	7	4
	ENSMUSG00000022791.19	Tnk2	-0.152241	7.124	5.78861	0.0251429	0.708241	4946	5033	6225	4799	5237	4924
	ENSMUSG00000030602.13	Pak4	-0.162277	5.42686	5.70213	0.0251282	0.708241	1476	1606	1925	1515	1585	1496
	ENSMUSG00000039697.16	Ncoa7	0.187966	4.66566	5.73957	0.0251496	0.708241	841	797	973	1170	1107	805
	ENSMUSG00000041849.7	Card6	0.283162	2.65828	5.69868	0.0251309	0.708241	182.3	220	217.94	293	263.85	225
	ENSMUSG00000007659.18	Bcl2l1	-0.135643	5.78033	5.69257	0.0252013	0.708586	2015	1987	2333	1990	2111	1842
	ENSMUSG00000034216.12	Vps18	0.188908	4.54262	5.69151	0.0252136	0.708586	691	753	957	1008	927	877
	ENSMUSG00000038459.10	Abhd17c	-0.160063	5.68218	5.7362	0.0252258	0.708586	1888	1761	2334	1790	1880	1817
	ENSMUSG00000053499.4	Gm5444	-1.20462	-1.94775	5.69328	0.0251931	0.708586	13	6	13	5	3	6
	ENSMUSG00000066441.14	Rdh11	0.133517	6.67533	5.69275	0.0251992	0.708586	3524	3440	3749	4323	4365	3488
	ENSMUSG00000035783.9	Acta2	0.191861	5.29089	6.08166	0.0252531	0.708635	1329	1212	1483.03	1829	1696	1240
	ENSMUSG00000095351.2	Igkv3-2	-2.8068	-3.34671	5.68888	0.025244	0.708635	2	3	4	1	0	0
	ENSMUSG00000041828.15	Abca8a	0.176646	4.86934	5.68742	0.0252795	0.709016	970	906	1147	1311	1287	938
	ENSMUSG00000068735.14	Trp53i11	0.13493	6.21618	5.6825	0.0253179	0.709734	2440	2509	2850	3028	2987	2805
	ENSMUSG00000069899.3	Gm12166	-0.275848	2.5278	5.6808	0.0253378	0.709931	230.37	199.67	260.86	212	195.55	179.91
	ENSMUSG00000001521.12	Tulp3	0.192794	3.90752	5.66252	0.0255511	0.712667	495	481	561	661	642	514
	ENSMUSG00000009670.11	Tex11	4.88588	-3.28376	6.73751	0.0254575	0.712667	0	0	0	9	2	0
	ENSMUSG00000029670.12	Ing3	0.219657	3.58742	5.66476	0.025525	0.712667	386	383	449	554	521	394
	ENSMUSG00000039678.12	Tbc1d13	0.150877	4.93299	5.66976	0.0254664	0.712667	1044	994	1144	1312	1250	1087
	ENSMUSG00000048222.3	Mfap1b	0.146396	5.30562	5.66274	0.0255486	0.712667	1396.25	1301.2	1424.7	1684.56	1610.14	1422.39
	ENSMUSG00000075265.4	Tnk2os	-0.720687	-0.761404	5.66278	0.0255481	0.712667	23	21	30	18	13	15
	ENSMUSG00000078870.9	Gm14410	0.427258	1.35336	5.66283	0.0255476	0.712667	70.06	57.36	108.82	127.6	106.18	92.15
	ENSMUSG00000087370.3	Tmem170b	-0.139942	5.62195	5.66661	0.0255032	0.712667	1925	1686	2075	1870	1873	1582
	ENSMUSG00000106251.1	Gm42658	-0.473056	0.67674	5.66706	0.0254979	0.712667	76	58	64	48	49	50
	ENSMUSG00000109618.1	Gm45527	1.8509	-2.80683	5.66143	0.025564	0.712668	1	2	1	8	5	3
	ENSMUSG00000101133.1	Gm29050	1.35886	-1.5409	6.10493	0.0256007	0.713332	4.28	8.86	4.3	25.94	17.37	4.31
	ENSMUSG00000002900.16	Lamb1	0.173277	6.06322	6.02822	0.0256635	0.713669	2247	2198	2467	3058	2912	2124
	ENSMUSG00000010067.13	Rassf1	-0.137237	5.50747	5.65516	0.0256377	0.713669	1683.44	1632.65	1929.36	1727.45	1732.02	1463.57
	ENSMUSG00000020745.15	Pafah1b1	-0.127363	7.64101	5.64963	0.025703	0.713669	7695	6981	8276	7487	7780	6436
	ENSMUSG00000030815.11	Phkg2	-0.142898	5.30836	5.65059	0.0256916	0.713669	1475.45	1439.76	1658.67	1453.56	1467.82	1347.1
	ENSMUSG00000031375.17	Bgn	0.162964	8.95721	5.91897	0.0256819	0.713669	15169	16925	19612	21669	21634	16598
	ENSMUSG00000086866.2	4930512H18Rik	0.617866	0.00211024	5.65145	0.0256814	0.713669	32.66	15.2	34.5	49.85	44.93	35.51
	ENSMUSG00000096793.7	Gm3002	-2.67718	-3.22618	5.65319	0.0256609	0.713669	5.59	1.42	3.53	0	0	1.37
	ENSMUSG00000073805.5	Insyn2a	0.566909	-0.0454801	5.64648	0.0257402	0.714345	31	22	28	41	45	38
	ENSMUSG00000051444.9	Bbs12	0.267685	2.75588	5.63655	0.025858	0.717254	198	228	243	280	281	269
	ENSMUSG00000042541.10	Sem1	-0.125814	6.57951	5.63427	0.025885	0.717286	3535	3462	3989	3593	3631	3165
[truncated: 53,422 more rows]

## Sheet: b Feet DEGs n=199
Gene list from a with q<0.05 filter. n=199 DEGs	Ensembl	GeneID	logFC	logCPM	F	PValue	FDR	C57Feet1	C57Feet2	C57Feet3	S211AFeet1	S211AFeet2	S211AFeet3
	ENSMUSG00000084033.3	Gm7645	6.26554	-2.44919	29.2761	1.90006e-05	0.0122445	0	0	0	5.62	15.82	7.58
	ENSMUSG00000083939.1	Gm14451	6.05821	-2.60786	25.0463	5.07533e-05	0.0230157	0	0	0	5.6	6.56	12.54
	ENSMUSG00000083012.9	Fam220a	2.51454	2.28594	281.738	7.70282e-15	2.13449e-10	57.45	46.5	53.45	300.09	291.62	332.76
	ENSMUSG00000031079.12	Zfp300	2.34432	-1.44982	28.7543	1.62005e-05	0.0109493	3	3	5	23	17	19
	ENSMUSG00000105837.4	Gm35986	1.96314	0.774872	97.3215	5.85968e-10	2.70625e-06	23	22	29	102	101	95
	ENSMUSG00000042638.14	Gucy2c	1.9218	0.0493243	43.1076	1.35313e-06	0.00178552	8	12	25	51	61	63
	ENSMUSG00000086428.1	Gm15199	1.69382	-0.696571	25.2	3.85987e-05	0.0187647	7	12	10	30	27	40
	ENSMUSG00000084897.1	Gm14226	1.52379	1.10787	48.9892	1.27637e-06	0.00178552	35	46	37	157	120	78
	ENSMUSG00000090942.1	F830016B08Rik	1.26955	1.03441	46.7818	4.28796e-07	0.000904996	37	44	47	130	103	87
	ENSMUSG00000025955.13	Akr1cl	1.23792	-0.148304	21.4791	0.000103158	0.0355102	16	24	15	48	45	42
	ENSMUSG00000021207.9	Akr1c21	1.09308	4.66613	104.471	1.15924e-06	0.00169068	565	648	556	1232	1432	1247
	ENSMUSG00000025202.8	Scd3	1.00141	7.09211	300.839	3.69217e-15	2.04624e-10	3234.18	3289.44	3459.4	7147.24	7588.76	5981.71
	ENSMUSG00000056592.14	Zfp658	0.962789	0.977245	25.7633	3.34913e-05	0.0168738	40	56	46	108	92	87
	ENSMUSG00000115902.1	AC113595.1	0.946935	2.33853	30.846	8.82378e-05	0.0317547	150.39	117.38	105.59	302.67	262.26	186.62
	ENSMUSG00000054580.14	Pla2r1	0.946468	4.75127	69.2167	2.07532e-05	0.0127796	672.35	685.91	654.42	1576.16	1437.67	1031.13
	ENSMUSG00000039783.15	Kmo	0.933783	1.00129	23.0617	6.72249e-05	0.0269423	53	55	38	106	95	89
	ENSMUSG00000090222.2	Ifi203-ps	0.925739	2.96211	40.0297	2.62622e-05	0.0148518	217.19	176.86	191.19	485.6	391.33	281.2
	ENSMUSG00000073555.1	Gm4951	0.88038	4.43026	51.9963	6.27229e-05	0.0259415	553.05	568	538	1284.21	1079	820
	ENSMUSG00000020553.8	Pctp	0.802157	2.63012	41.4888	1.11642e-06	0.00169068	142	185	163	308	304	273
	ENSMUSG00000058900.5	Rsl1	0.799632	1.16412	20.939	0.000119826	0.038166	57.83	57.98	59.06	129.08	99.88	86.78
	ENSMUSG00000078616.2	Trim30c	0.77246	2.45305	24.8401	0.00014823	0.0439306	161	154	122	308	273	199
	ENSMUSG00000081362.3	Cyp2j7	0.738052	3.79465	55.6998	2.33554e-07	0.000539324	379	401	354	694	736	540
	ENSMUSG00000071281.12	Zfp65	0.733668	2.72993	39.6848	1.57546e-06	0.0019844	168	192	182	307	321	303
	ENSMUSG00000035299.16	Mid1	0.726572	6.03272	52.2939	0.000107987	0.0364923	1960.64	1725.14	1715.67	3177.19	2973.42	3076.07
	ENSMUSG00000030469.10	Zfp719	0.708465	1.82731	23.4526	6.06207e-05	0.0258435	103	90	98	185	181	128
	ENSMUSG00000074166.7	AW146154	0.694382	2.06975	26.8686	2.54749e-05	0.0147067	99.49	115.93	132.86	213.18	194.36	174.05
	ENSMUSG00000063047.9	Zfp780b	0.690684	2.37436	31.8402	8.00169e-06	0.00698872	156.76	127.96	146.52	245.84	254.04	219.38
	ENSMUSG00000097000.2	Gm17435	0.683815	1.79278	23.4116	6.1279e-05	0.0259248	94.57	93.58	99.06	176.79	165.28	135.89
	ENSMUSG00000000409.14	Lck	0.654742	2.08325	23.3498	6.22864e-05	0.0259415	125	107	125	221	209	153
	ENSMUSG00000032841.15	Prr5l	0.653948	2.09506	20.9999	0.000117809	0.0381109	120	113	127	245	193	150
	ENSMUSG00000054715.11	Zscan22	0.608008	2.45339	20.9849	0.000118301	0.0381109	138	177	156	249	240	252
	ENSMUSG00000037640.15	Zfp60	0.607062	2.49173	26.9909	2.47248e-05	0.014424	162	157	165.95	253.98	264.97	243.57
	ENSMUSG00000030157.5	Clec2d	0.594055	6.83043	104.844	2.81392e-10	1.49936e-06	3302	3260	3394	5645	5407	4527
	ENSMUSG00000082361.6	Btc	0.574877	4.13215	36.5292	9.99135e-06	0.00791044	545	499	496	760	786	818
	ENSMUSG00000059423.13	Zfp933	0.559591	2.69992	22.744	7.31687e-05	0.0281603	195	194	182	285	301	284
	ENSMUSG00000113450.1	Gm49359	0.55883	2.65557	22.0916	8.72399e-05	0.0316008	192	187.67	173.81	306.89	277.82	260
	ENSMUSG00000041623.17	D11Wsu47e	0.556401	2.65983	20.278	0.00014432	0.0436182	184	189	183	332	300	219
	ENSMUSG00000055546.6	Timd4	0.546956	3.22849	25.2664	3.79549e-05	0.0187647	304	239	290	489	439	334
	ENSMUSG00000067942.6	Zfp160	0.512609	3.73961	24.6763	8.6815e-05	0.0316008	391.58	428.6	380.3	681.76	620.7	481.35
	ENSMUSG00000059839.9	Zfp874b	0.509107	3.06733	19.5545	0.00017752	0.0495987	273.96	257.3	220.48	393.59	384.35	333.63
	ENSMUSG00000039934.12	Gsap	0.507549	3.25934	21.3321	0.000111555	0.0370208	294	272	298	518	429	329
	ENSMUSG00000038112.15	AW551984	0.503599	4.73216	49.377	2.75414e-07	0.000610548	817	724	876	1337	1176	1027
	ENSMUSG00000038007.14	Acer2	0.501821	6.23885	68.4882	1.61228e-08	5.90999e-05	2281	2277	2298	3379	3706	2980
	ENSMUSG00000020707.6	Rnf135	0.497913	3.29394	23.8011	5.53236e-05	0.0239538	291	302	294	495	446	360
	ENSMUSG00000021091.8	Serpina3n	0.496129	9.04169	60.4719	1.13786e-07	0.000286151	15674.1	15684.9	16691	26957	23229	20065
	ENSMUSG00000091474.2	2610021A01Rik	0.49518	3.18501	23.665	5.73307e-05	0.0246304	279.46	262.45	282.38	431.44	449.08	325.49
	ENSMUSG00000070609.3	Aadacl4	0.492785	5.74835	50.5209	7.70507e-07	0.00137733	1643	1681	1563	2444	2520	2170
	ENSMUSG00000078349.3	AW011738	0.492226	3.54198	27.7265	2.06893e-05	0.0127796	351	355	351	545	568	431
	ENSMUSG00000030124.2	Lag3	0.483958	3.30543	20.0754	0.000153705	0.0448342	345	264	291	487	455	364
	ENSMUSG00000043496.7	Tril	0.462681	3.41858	24.03	5.21204e-05	0.0231085	295.2	311.94	379.3	475.95	521.99	405.35
	ENSMUSG00000049872.8	Calhm5	0.456514	3.22905	22.4699	7.87539e-05	0.0296913	290	264	311	430	450	348
	ENSMUSG00000042579.2	4632404H12Rik	0.454687	3.53822	21.7465	9.58517e-05	0.0340525	361	368	340	508	513	494
	ENSMUSG00000058163.14	Gm5431	0.452536	4.00795	26.5621	2.74653e-05	0.0153753	492.1	445.46	555	831.06	681.23	597.49
	ENSMUSG00000010307.7	Tmem86a	0.447182	4.79097	29.9835	3.19932e-05	0.0164963	808	851	912	1256	1427	959
	ENSMUSG00000045573.9	Penk	0.443823	4.12844	31.1567	9.32145e-06	0.00765269	528.96	505.99	591.97	863.98	753	668.98
	ENSMUSG00000022014.15	Epsti1	0.439386	3.52578	21.284	0.000108868	0.036567	356	330	385	581	520	404
	ENSMUSG00000024066.9	Xdh	0.436213	8.86312	35.5993	3.51044e-05	0.0175272	14759	14183	14485.9	23534	20064	17402
	ENSMUSG00000029098.17	Acox3	0.433291	7.49204	59.9009	5.31728e-08	0.000173346	5252.96	5595.78	5991.77	7983.73	8289.9	7217.26
	ENSMUSG00000039220.16	Ppp1r10	0.431498	5.07259	43.317	7.95267e-07	0.00137733	1054	1029	1058	1506	1504	1369
	ENSMUSG00000036362.2	P2ry13	0.42923	3.45258	20.4861	0.000136069	0.0421289	334	326	361	530	513	383
	ENSMUSG00000011008.13	Mcoln2	0.427717	4.8123	28.8036	3.21467e-05	0.0164963	966	769	895	1358	1183	1113
	ENSMUSG00000026435.15	Slc45a3	0.426011	4.02124	24.758	4.31974e-05	0.0202885	452	502.95	565.83	746.02	789.98	580.04
	ENSMUSG00000072949.6	Acot1	0.425853	5.2713	37.5723	2.41113e-06	0.00256975	1067.92	1250.23	1300.78	1821.91	1739.07	1470.79
	ENSMUSG00000029919.5	Hpgds	0.422674	4.57294	37.2082	2.57055e-06	0.00263819	727	708	798	1126	1065	904
	ENSMUSG00000024481.5	Lvrn	0.421902	4.3991	25.6487	3.96498e-05	0.0191081	637	607	739	1088	916	745
	ENSMUSG00000026077.15	Npas2	0.417957	3.77321	20.4052	0.000139214	0.0428631	441	358	488	561	616	587
	ENSMUSG00000027951.16	Adar	0.416162	7.206	29.6368	0.000134993	0.0420305	4793.67	4533.96	4540.61	7345.8	6459.66	5424.97
	ENSMUSG00000090231.10	Cfb	0.414364	7.14543	30.7466	9.29376e-05	0.0332303	4518.09	4170.65	4656	7256	6077.7	5108
	ENSMUSG00000043090.18	Zfp866	0.412174	4.12987	22.6601	7.48298e-05	0.028601	545.04	572.55	522.96	806.44	750.27	705
	ENSMUSG00000022684.15	Bfar	0.408668	4.82304	23.9521	0.000146245	0.0436182	944.6	840.6	879.89	1352.58	1354.26	973.66
	ENSMUSG00000026088.15	Mitd1	0.408593	5.07873	27.6482	5.45587e-05	0.0238376	1070.73	1095.7	1009.08	1607.86	1492.42	1278.86
	ENSMUSG00000040987.15	Mill2	0.408455	4.19231	26.1902	3.01104e-05	0.0159837	554	571	596	865	849	656
	ENSMUSG00000024276.7	Zfp397	0.407082	5.07194	34.1551	4.83875e-06	0.00454522	1073	1055	1039	1534	1580	1247
	ENSMUSG00000026135.17	Zfp142	0.398765	3.8697	19.8205	0.000164439	0.0471624	415.07	480.17	484.96	700.7	659.74	526.87
	ENSMUSG00000023186.14	Vwa5a	0.393471	6.06504	32.7944	2.06777e-05	0.0127796	2054	2028	2283	3362	2959	2349
	ENSMUSG00000005360.14	Slc1a3	0.389519	4.88429	29.3307	1.4155e-05	0.0101731	947	873	988	1459	1226	1118
	ENSMUSG00000041238.16	Rbbp8	0.384879	5.89213	40.0504	1.46805e-06	0.00189212	1892.7	1861.51	1894.68	2597.41	2625.91	2401.67
	ENSMUSG00000024691.13	Fam111a	0.369616	3.94737	19.8067	0.000165091	0.0471624	486	495	491	699	698	575
	ENSMUSG00000060560.8	Ces4a	0.368168	6.11089	36.2593	3.1179e-06	0.00303153	2040	2253	2333	3158	3167	2540
	ENSMUSG00000000876.11	Pxmp4	0.366638	6.48554	33.5044	7.21137e-06	0.00644615	2822	2841	2928	4203	4154	3154
	ENSMUSG00000025887.10	Casp12	0.363782	4.60459	20.6383	0.000152707	0.0447786	783	727	826	1232	1020	862
	ENSMUSG00000034947.13	Tmem106a	0.359926	4.89763	25.2148	3.84539e-05	0.0187647	934	938	992	1420	1358	1038
	ENSMUSG00000029471.13	Camkk2	0.359309	5.9999	40.5769	1.32711e-06	0.00178552	2082	1936	2142	2903	2860	2413
	ENSMUSG00000022225.7	Cma1	0.35712	5.46058	27.5915	2.23355e-05	0.013455	1266	1469	1503	2031	1889	1694
	ENSMUSG00000026536.9	Ifi211	0.354117	7.60176	31.573	1.21022e-05	0.0091879	6430.35	5683.37	6654.76	9500.58	8207.78	7111.35
	ENSMUSG00000045795.10	Whamm	0.339542	5.13992	23.2742	6.35427e-05	0.0260859	1106	1122	1188	1651	1634	1205
	ENSMUSG00000027075.16	Slc43a1	0.330954	6.12629	25.744	5.16877e-05	0.0231015	2415	2158	2210	3107	2973	2748
	ENSMUSG00000066361.3	Serpina3c	0.329058	7.31398	31.251	9.12602e-06	0.00765269	5150.12	4860.77	5506	7608	6691.98	5863
	ENSMUSG00000047045.17	Tmem164	0.32755	7.50805	30.5336	1.0732e-05	0.00836138	5622	5910	6206	8449	8104	6533
	ENSMUSG00000042249.11	Grk3	0.323186	5.11702	24.1075	5.10804e-05	0.0230157	1050	1089	1252	1482	1461	1421
	ENSMUSG00000020607.7	Lratd1	0.318065	6.55222	27.0942	2.41099e-05	0.0142148	2929	3073	3169	4174	3855	3772
	ENSMUSG00000049421.13	Zfp260	0.315967	5.00769	22.3688	8.0932e-05	0.0299022	1077	983	1086	1492	1407	1158
	ENSMUSG00000025986.6	Slc39a10	0.305771	5.73999	28.1305	1.87814e-05	0.0122445	1679	1619	1968	2414	2330	1973
	ENSMUSG00000046768.13	Rhoj	0.301108	6.68069	22.3157	0.000106617	0.036474	3338	3096	3689	4933	4468	3518
	ENSMUSG00000040209.12	Zfp704	0.299121	4.85999	19.844	0.000163331	0.0471458	935	915	1009	1318	1301.71	1025
	ENSMUSG00000055653.13	Gpc3	0.298842	5.59484	20.2279	0.000146388	0.0436182	1534	1454	1787	2237	2216	1629
	ENSMUSG00000005686.17	Ampd3	0.290017	6.44248	22.9621	6.90303e-05	0.0269423	2929.86	2805.76	2846.09	3797.18	3664.58	3391.26
	ENSMUSG00000025153.9	Fasn	0.282674	8.48811	21.6175	9.93015e-05	0.0346125	10644	12072	12923	16111	15643	13105
	ENSMUSG00000003721.14	Insig2	0.271597	6.42917	21.3367	0.000107292	0.0364801	2842	2811	2917	3778	3888	3067
Down regulated	ENSMUSG00000118332.1	Fam220a	-0.251983	5.75085	19.9963	0.000156367	0.0453717	2133.43	1959.42	2352.55	1922.83	1941.37	1714.96
n=100	ENSMUSG00000099009.1	Rdh16f1	-0.255852	5.6397	19.7246	0.00016903	0.0480401	2002.66	1850.67	2113.3	1785.83	1849.05	1530.55
	ENSMUSG00000035356.17	Nfkbiz	-0.258971	6.81217	21.0804	0.000115196	0.0377768	4371	3962	5186	4028	4054	3540
	ENSMUSG00000038949.8	Cnst	-0.269382	5.77002	20.7343	0.000126893	0.0399575	2129	1959	2490	1886	1947	1777
	ENSMUSG00000042507.15	Elmsan1	-0.272905	7.4664	20.6571	0.00012967	0.0406015	6720	6401	8252	5941	6317	5889
	ENSMUSG00000038518.15	Jarid2	-0.274752	6.20015	23.8498	5.46249e-05	0.0238376	2955	2726	3178	2495	2652	2397
	ENSMUSG00000021182.16	Ccdc88c	-0.279211	5.68775	20.2999	0.000143428	0.0436182	2065.83	1837.98	2325.97	1704.99	1904	1670.98
	ENSMUSG00000021670.14	Hmgcr	-0.280567	7.5817	24.8911	4.17527e-05	0.0199481	7651	7078	8419	7186	6951	5577
	ENSMUSG00000020275.9	Rel	-0.280817	6.56212	20.9823	0.000118388	0.0381109	3963	3395	4052	3588	3416	2720
	ENSMUSG00000039782.15	Cpeb2	-0.282458	6.75454	26.3497	2.89437e-05	0.0157263	4168	3940.99	4967	3767	3934	3368
	ENSMUSG00000016262.14	Sertad4	-0.282963	5.42435	20.3442	0.000141638	0.0433687	1624	1636	1930.11	1432	1541.06	1415
	ENSMUSG00000096472.2	Cdkn2d	-0.28643	5.5281	22.9781	6.87362e-05	0.0269423	1816	1676	2097	1635	1599	1480
	ENSMUSG00000053716.9	Dusp7	-0.286519	6.99017	22.992	6.84828e-05	0.0269423	4827	4742	5842	4184	4572	4220
	ENSMUSG00000026604.17	Ptpn14	-0.288427	6.93647	28.1482	1.87025e-05	0.0122445	4891	4536	5409	4167	4529.99	3830
	ENSMUSG00000066687.5	Zbtb16	-0.291387	7.26494	29.6318	1.31993e-05	0.00975361	6257	5701	6678	5574	5438	4712
	ENSMUSG00000033713.12	Foxn3	-0.291901	7.23082	24.4426	4.68412e-05	0.021815	6269	5309	6649	5383	5623	4382
	ENSMUSG00000068742.11	Cry2	-0.293802	7.4634	24.3198	4.83485e-05	0.0223293	7102.02	6159.72	8210.3	5945.53	6362.39	5680.66
	ENSMUSG00000033016.16	Nfatc1	-0.295142	6.01615	20.7658	0.000150715	0.0444297	2361	2451	3058	2191	2506	1918
	ENSMUSG00000031788.14	Kifc3	-0.29736	5.59796	23.3238	6.27158e-05	0.0259415	1827.27	1884.43	2166.02	1651.76	1672.93	1596.19
	ENSMUSG00000012350.15	Ehf	-0.297597	5.46466	20.7672	0.000125727	0.0398166	1844	1624	1886	1496	1504	1482
	ENSMUSG00000036777.8	Anln	-0.299059	5.28505	21.6745	9.77612e-05	0.0343038	1529	1449	1759	1350	1309	1297
	ENSMUSG00000052397.8	Ezr	-0.300677	8.29497	23.1777	7.552e-05	0.0286671	11917	11732	14616	10354	10878	10618
	ENSMUSG00000037885.18	Stk35	-0.301165	5.95099	29.1503	1.47635e-05	0.0102276	2434	2309	2780	2138	2174	1974
	ENSMUSG00000031955.10	Bcar1	-0.305722	6.04379	26.1291	3.0571e-05	0.0159837	2534	2398	3120	2321	2247	2121
	ENSMUSG00000089789.1	Rdh1	-0.311946	5.7	29.7453	1.28573e-05	0.00962922	2073.97	1961.93	2301.63	1853.95	1890.96	1531.73
	ENSMUSG00000030946.13	Lhpp	-0.312784	5.34276	26.2103	2.99604e-05	0.0159837	1569	1502	1886	1437	1470	1208
	ENSMUSG00000069792.5	Wfdc17	-0.314078	7.70724	26.4392	2.83106e-05	0.0156537	8213	7821	9505	6844	7165	7068
	ENSMUSG00000018476.7	Kdm6b	-0.316364	6.35736	25.8742	3.25755e-05	0.016563	2987.15	3148.73	3900.29	2723.69	2918.74	2637.33
	ENSMUSG00000057614.6	Gnai1	-0.318519	5.89158	22.5885	0.000112405	0.0370811	2398	2004	2885	2110	2080	1812
	ENSMUSG00000020893.17	Per1	-0.319748	8.30053	28.4592	1.73702e-05	0.0115985	12340	11389	14950	10357	11313	10139
	ENSMUSG00000040857.15	Erf	-0.322645	6.32476	32.8115	6.46248e-06	0.00596929	3095	3029	3697	2682	2860	2538
	ENSMUSG00000025981.13	Coq10b	-0.323559	5.02916	19.9175	0.000171641	0.0485333	1331.49	1124.39	1550.9	1149.28	1232.51	921.13
	ENSMUSG00000039323.18	Igfbp2	-0.333235	6.52207	29.2659	1.43704e-05	0.0101731	3383	3667	4239	3020	3215	2980
	ENSMUSG00000006445.3	Epha2	-0.336703	5.99437	24.3203	9.77968e-05	0.0343038	2362	2418	3075	2078	2181	2116
	ENSMUSG00000074743.4	Thbd	-0.3423	7.25848	25.1784	0.000111062	0.0370208	5601	5639	7708	5454	5263	4629
	ENSMUSG00000032578.7	Cish	-0.343953	5.82595	30.906	9.86313e-06	0.00791044	2114	2142	2750	1923	2038	1718
	ENSMUSG00000054499.9	Dedd2	-0.344778	6.92006	25.0559	0.000118965	0.0381109	4789.95	4429.91	5740.78	4001.93	3957.91	4099.91
	ENSMUSG00000092572.7	Serpinb10	-0.349413	4.41849	21.5651	0.000100744	0.0348958	848.33	798.38	990.54	675.76	783.97	670.53
	ENSMUSG00000071856.10	Mcc	-0.354649	5.80632	37.6748	2.34047e-06	0.00256975	2231.79	2197.07	2478.07	1842.2	1964.25	1761.9
	ENSMUSG00000042677.7	Zc3h12a	-0.36249	5.63932	36.3535	3.05825e-06	0.00302663	2027	1850	2302	1657	1699	1585
	ENSMUSG00000024846.6	Cst6	-0.36643	8.2329	33.9377	7.06281e-06	0.00641685	11257	11686	14466	9577	10626	9592
	ENSMUSG00000003752.9	Itpkc	-0.373854	7.2922	42.2849	9.61984e-07	0.00152326	6335.92	5860.09	7320.45	5209.12	5234.69	5023.34
	ENSMUSG00000014846.12	Tppp3	-0.381907	7.20346	39.4523	1.64817e-06	0.00202985	5708	5518	7201	4708	5275	4543
	ENSMUSG00000035828.11	Pim3	-0.385932	7.82827	40.564	1.33038e-06	0.00178552	8906	8418	11135	7360	7819	7160
	ENSMUSG00000037126.16	Psd	-0.387494	3.79313	22.1514	8.58361e-05	0.0315041	554.71	542.76	627.28	455.52	501.05	405.06
	ENSMUSG00000035385.5	Ccl2	-0.394735	5.97662	37.9041	2.50321e-06	0.00261755	2286	2573	3026	2121	2240	1826
	ENSMUSG00000053113.3	Socs3	-0.396248	8.26682	39.0314	3.01187e-06	0.00302663	12273	11101	15354	10169	11215	8889
	ENSMUSG00000055866.9	Per2	-0.399272	4.98714	38.0666	2.16444e-06	0.00249908	1249	1281	1436	1121	1098	892
	ENSMUSG00000024524.17	Gnal	-0.427321	3.53777	19.5563	0.000177426	0.0495987	496.63	437.52	527.57	361.35	449.26	314.06
	ENSMUSG00000073079.6	Srp54a	-0.434161	5.75316	54.5798	1.18754e-07	0.000286151	2324.51	2138.03	2346.82	1780.32	1876.84	1556.74
	ENSMUSG00000061144.5	Spink12	-0.440728	4.37436	28.1106	2.00747e-05	0.0127796	747	836	1050	694	735	571
	ENSMUSG00000027401.9	Tgm3	-0.457765	8.0849	42.1558	9.38964e-06	0.00765269	10676	10661	13355	8551	8502	8808
	ENSMUSG00000022871.13	Fetub	-0.464222	3.52989	22.3751	8.07925e-05	0.0299022	462	447	563	359	351	383
	ENSMUSG00000095213.2	Gm9944	-0.467722	4.37336	41.4094	1.13324e-06	0.00169068	849	810	988	716	689	571
	ENSMUSG00000062345.10	Serpinb2	-0.489563	6.47412	60.0342	7.58605e-08	0.000200203	3639.67	3444.62	4374.46	2903.24	2696.03	2769.47
	ENSMUSG00000059606.3	Rnase2b	-0.507749	3.69814	26.7682	2.85275e-05	0.0156537	553	527	591	385	386	435
	ENSMUSG00000091618.3	H60c	-0.542886	5.56061	62.3505	7.36876e-08	0.000200203	1977.8	1993.95	2178.81	1382.86	1480.87	1477.85
	ENSMUSG00000020062.7	Slc5a8	-0.549428	2.66061	23.1598	6.54972e-05	0.0266906	265	252	305	181	221	177
	ENSMUSG00000021573.15	Tppp	-0.554258	4.80459	48.8717	8.6114e-07	0.00140368	1176	1053	1441	802	903	855
	ENSMUSG00000051998.14	Lax1	-0.558917	2.55836	22.8276	7.15503e-05	0.02773	269	214	285	187	188	162
	ENSMUSG00000042845.7	Wfdc12	-0.560939	6.0558	47.5431	2.12625e-05	0.0129493	2982.93	2617.95	3126.94	1951.96	1991.99	2122.94
	ENSMUSG00000071192.6	Wfikkn1	-0.59069	3.88319	46.6218	4.40896e-07	0.000904996	678	571	699	442	447	441
	ENSMUSG00000059956.14	Serpinb12	-0.6055	7.27983	47.2033	6.68231e-05	0.0269423	6839	6379	7428	4457	4515	4932
	ENSMUSG00000085894.1	Gm15832	-0.639951	2.37102	22.3792	8.07049e-05	0.0299022	244.62	171.81	274.39	171.52	155.8	128.7
	ENSMUSG00000020185.16	E2f7	-0.64808	3.92289	57.529	7.55738e-08	0.000200203	608	626	806	485	467	389
	ENSMUSG00000095595.2	Fam177a	-0.650545	5.58263	107.772	2.13981e-10	1.36688e-06	1968.48	2035.39	2448.76	1384.78	1545.52	1303.24
	ENSMUSG00000090698.2	Apold1	-0.652816	3.89723	48.0486	4.66831e-07	0.000924009	572	600	839	447	479	388
	ENSMUSG00000109198.1	D7Bwg0826e	-0.659705	2.39956	28.812	1.59819e-05	0.010935	245.02	194.44	267.64	165.52	161.84	133.83
	ENSMUSG00000112449.1	Srp54b	-0.671722	4.88645	59.6983	1.72383e-06	0.00207687	1308.52	1181.93	1515.92	968.86	976.61	660.17
	ENSMUSG00000032908.9	Sgpp2	-0.721141	4.90907	104.254	2.97593e-10	1.49936e-06	1411.92	1160.44	1552	916.4	919.75	743.83
	ENSMUSG00000024206.15	Rfx2	-0.721918	4.11654	68.0612	1.70621e-08	5.90999e-05	713	708	962	468	541	473
	ENSMUSG00000044594.14	Serpinb3a	-0.783754	4.73977	107.376	2.21972e-10	1.36688e-06	1180.46	1089.62	1459.93	742.12	737.04	740.55
	ENSMUSG00000058017.6	Serpinb3d	-0.807075	2.19847	36.1136	3.21253e-06	0.00306969	193	191	255	117	127	130
	ENSMUSG00000108022.1	Gm7298	-0.81065	6.35762	171.274	1.78388e-12	2.47162e-08	3874.99	3410.98	4227	2369	2551	1871.99
	ENSMUSG00000041132.11	N4bp2l1	-0.850377	3.65819	77.8696	4.9473e-09	2.10911e-05	584	583	612	317.35	343	355
	ENSMUSG00000043421.8	Hilpda	-0.900501	4.64336	135.549	2.083e-11	1.92403e-07	1182	1031	1377	658	766	560
	ENSMUSG00000079480.3	Pin4	-0.913663	2.96883	75.3282	6.73706e-09	2.66696e-05	378.41	347.58	393.67	200.38	231.72	182.15
	ENSMUSG00000093954.8	Gm16867	-0.921457	2.39633	36.9893	1.08627e-05	0.00836138	268.59	202.52	283.25	127.57	181.35	103.09
	ENSMUSG00000056656.6	Apol8	-0.947681	1.81981	45.3763	5.48794e-07	0.00104878	170	151	185	96	88	86
	ENSMUSG00000068885.4	Lce3f	-0.961504	1.2771	31.3098	9.00652e-06	0.00765269	114.48	93.52	139.04	58.57	74.84	50.05
	ENSMUSG00000056836.8	Gm6851	-0.995761	1.88213	43.7556	7.34137e-07	0.00135622	166.91	154.42	214.75	79.31	98.68	97.12
	ENSMUSG00000054200.7	Ffar4	-1.00009	1.28917	37.8426	2.26325e-06	0.00255983	120	108	124	67	66	49
	ENSMUSG00000059113.2	Gm10061	-1.00234	1.16938	29.4381	1.38058e-05	0.0100675	92	95	138	65	46	55
	ENSMUSG00000009047.4	Gm5965	-1.02437	3.61576	53.5126	3.04395e-05	0.0159837	490.81	557.91	765.22	335.88	269.63	306.17
	ENSMUSG00000067149.6	Jchain	-1.04148	1.13876	26.4389	4.29414e-05	0.0202885	84	83	155	61	56	43
	ENSMUSG00000095079.6	Igha	-1.14807	2.56841	45.4059	2.41024e-05	0.0142148	224	283	392	123	144	147
	ENSMUSG00000038242.12	Aox4	-1.20166	3.35331	158.297	4.11597e-12	4.56222e-08	540.91	458.71	564.46	235.43	249.29	216.15
	ENSMUSG00000074433.4	Lce3e	-1.20206	0.0737278	24.2635	4.90575e-05	0.0224696	46.03	52.85	55.32	26.79	17.59	24.43
	ENSMUSG00000080058.2	Gm11175	-1.25543	0.905075	37.6083	2.37185e-06	0.00256975	98.42	94.11	90.54	29.37	50.66	42.27
	ENSMUSG00000041984.2	Rptn	-1.2975	4.80206	261.92	3.52594e-13	6.5137e-09	1401	1246	1734	582	634	609
	ENSMUSG00000019232.14	Etnppl	-1.34755	1.23163	58.5156	6.52106e-08	0.000200203	128	100	137	59	52	37
	ENSMUSG00000047889.9	Serpinb6d	-1.42586	1.06671	46.4655	8.30661e-07	0.00139503	85	95	151	34	54	38
	ENSMUSG00000053228.12	Ceacam3	-1.5401	-0.370246	29.227	1.45012e-05	0.0101731	45	31	43	18	13	11
	ENSMUSG00000112963.1	Gm6093	-1.59147	2.18132	56.7771	2.59993e-05	0.0148518	264	226.15	253	118	89.66	49.12
	ENSMUSG00000108441.1	Gm32846	-1.81439	-1.19065	22.962	6.90316e-05	0.0269423	20.69	16.02	30.14	6	6.6	6.6
	ENSMUSG00000076614.7	Ighg1	-2.45719	-1.12155	31.8016	8.07055e-06	0.00698872	21	14	42	6	5	3
	ENSMUSG00000042179.6	Pnliprp1	-3.19339	-2.04856	20.739	0.000145066	0.0436182	6	23	9	2	1	1
	ENSMUSG00000118030.1	Gm50163	-4.00268	-1.78069	38.9641	1.81295e-06	0.00213778	10.67	19.85	19.68	0	1.27	1.6
	ENSMUSG00000078087.5	Rps12l1	-4.15074	-0.212858	131.338	2.8844e-11	2.28366e-07	57.45	58.88	54.46	3.91	4.92	0.8
	ENSMUSG00000047977.3	Synb	-5.69239	-2.87082	20.1713	0.000178094	0.0495987	7.46	7.4	3.71	0	0	0

## Sheet: c All genesGzmaS211A+pIC spleen
RNA-Seq of spleen taken at 6 hours after injection with poly(I:C) from GzmaS211A versus 6J mice (NCBI Bioproject PRJNA666748), all genes	Ensembl_ID	GeneID	logFC	logCPM	F	PValue	FDR	C57Spleen1	C57Spleen2	C57Spleen3	S211ASpleen1	S211ASpleen2	S211ASpleen3
	ENSMUSG00000028211.11	Trp53inp1	-0.975741	7.67125	74.9932	2.28808e-07	0.0126808	8212	10818	7704	3729	2828	3797
	ENSMUSG00000035299.16	Mid1	1.31391	6.34233	87.7626	5.76183e-07	0.0159663	1519.71	1645.37	1416.8	2647.44	2755.57	3157.94
	ENSMUSG00000049892.7	Rasd1	-1.08489	3.81102	53.7861	1.90017e-06	0.032859	648	656	556	252	164	263
	ENSMUSG00000076731.3	Ighv8-12	-0.97402	4.09676	51.8802	2.37159e-06	0.032859	715.47	796	709	360	198	322
	ENSMUSG00000076612.8	Ighg2c	-1.41525	7.51554	77.8082	5.49274e-06	0.0608826	8963.47	7453.52	9606	2580	1841.42	3149.78
	ENSMUSG00000015243.4	Abca1	-0.706414	6.65484	41.7477	8.67787e-06	0.0712244	4258	4458	3560	2148	1602	2016
	ENSMUSG00000079480.3	Pin4	-1.36563	2.42293	41.4897	8.99607e-06	0.0712244	196.72	258.65	292.35	76.67	50.73	95.77
	ENSMUSG00000031778.13	Cx3cl1	0.924045	5.12099	42.644	1.14727e-05	0.0794784	902	747	697	1192	952	1281
	ENSMUSG00000000838.17	Fmr1	-0.731531	5.9286	38.3689	1.41007e-05	0.0868306	2144.01	3142.03	2248.01	1443.02	924.03	1104.02
	ENSMUSG00000037580.10	Gch1	-0.68777	6.06459	35.8038	2.08244e-05	0.0928513	2143	3221	2825	1624	933	1362
	ENSMUSG00000040280.10	Ndufa4l2	-1.76674	1.18412	34.2099	2.68061e-05	0.0928513	73	159	101	35	21	18
	ENSMUSG00000041782.14	Lad1	0.899935	3.39561	34.2351	2.66975e-05	0.0928513	209	267	248	353	306	363
	ENSMUSG00000056260.15	Lrif1	-0.672723	5.0156	36.3433	1.91535e-05	0.0928513	1255	1429	1223.06	671.75	538	657
	ENSMUSG00000066800.11	Rnasel	-0.663898	6.53874	35.9642	2.0311e-05	0.0928513	3286	4165	3808	2406	1426	1647
	ENSMUSG00000087263.1	Gm15726	2.37283	-0.172677	34.5992	2.51839e-05	0.0928513	11.15	8.04	8.16	25.77	41.85	39.04
	ENSMUSG00000095889.1	Ighv1-58	-1.47062	1.60368	34.8738	2.41058e-05	0.0928513	145	130	147	55	22	43
	ENSMUSG00000031570.17	Plpp5	-0.749741	4.29948	31.743	4.03009e-05	0.0971193	829	823	762	451	258	410
	ENSMUSG00000053641.9	Dennd4a	-0.547809	7.45434	32.3761	3.62222e-05	0.0971193	6427	7485	6624	4452	2759	3635
	ENSMUSG00000056836.8	Gm6851	-1.42498	1.18377	31.9837	3.86925e-05	0.0971193	103.11	115.92	91.78	41.76	20.8	27.23
	ENSMUSG00000078143.3	Gm17344	-3.01048	0.699883	42.477	3.80982e-05	0.0971193	132.72	67.31	58.19	5.34	9.25	9.82
	ENSMUSG00000078566.8	Bnip3	-0.97684	3.92678	32.9272	3.70601e-05	0.0971193	508.58	928.02	561.91	292.32	212.12	263.39
	ENSMUSG00000093896.2	Ighv1-76	-0.908466	3.26756	32.6218	3.47666e-05	0.0971193	352	454	422.99	179	152	164
	ENSMUSG00000112449.1	Srp54b	-0.72314	4.82252	31.7424	4.0305e-05	0.0971193	949.2	1350.11	1182.77	565.4	399.73	648.98
	ENSMUSG00000096074.2	Ighv1-72	-1.05956	4.39156	37.3103	4.44756e-05	0.102703	626.13	1270.9	924.78	409.05	270.39	347.39
	ENSMUSG00000029186.12	Pi4k2b	-0.66981	4.88381	30.2943	5.17394e-05	0.110287	1215	1188	1146	743	425	569
	ENSMUSG00000037788.14	Vopp1	-0.65974	5.99222	30.3787	5.09798e-05	0.110287	2003	3035	2693	1625	940	1200
	ENSMUSG00000095538.1	Gm21983	6.53509	-2.05343	33.0383	5.52673e-05	0.113443	0	0	0	9.5	13.24	6.14
	ENSMUSG00000081953.1	Gm12435	-6.67109	-1.71169	31.5733	6.91097e-05	0.13679	19.51	6.97	15.59	0	0	0
	ENSMUSG00000034445.8	Cyb561a3	0.594045	6.91323	28.2051	7.52869e-05	0.143878	2544.21	3632.69	3345.29	4603.84	3000.07	3384.1
	ENSMUSG00000042599.8	Kdm7a	-0.551263	6.31388	27.5203	8.54844e-05	0.157921	2967.97	3404.82	2941.2	1953.98	1399.97	1503.4
	ENSMUSG00000095649.3	Gm8979	-0.852599	3.14447	27.2988	8.91088e-05	0.159306	298.19	416.27	400.17	181.32	116.81	175.75
	ENSMUSG00000043460.7	Elfn2	-2.905	-0.844635	26.6013	0.00010171	0.176151	43	17	19	3	2	3
	ENSMUSG00000020641.16	Rsad2	-0.68519	11.1535	26.438	0.000104943	0.176244	74020	108717	96016	58413	30845	45111
	ENSMUSG00000037533.20	Rapgef6	-0.564772	7.42541	26.1327	0.000111306	0.181431	6834	6851	6457	4174	3053	3200
	ENSMUSG00000021377.15	Dek	-0.547667	8.00074	25.9761	0.000114736	0.181679	9251.04	10771.2	9973.97	6966.61	3883.05	5085.17
	ENSMUSG00000020189.15	Osbpl8	-0.526829	6.11062	25.465	0.000126794	0.185277	2441	3198	2423	1688	1164	1426
	ENSMUSG00000022280.9	Rnf19a	-0.604252	5.74656	25.5986	0.000123511	0.185277	2176	2244.86	1936	1372	890	961
	ENSMUSG00000046404.5	Yod1	-0.640492	4.16233	25.4553	0.000127037	0.185277	601	833	716	418	280.91	356
	ENSMUSG00000028522.16	Mier1	-0.592505	6.84322	25.0616	0.000137327	0.191047	3691	5735	4288	2970	1772.79	2236
	ENSMUSG00000031246.14	Sh3bgrl	-0.579605	6.65749	25.0411	0.000137887	0.191047	3711.57	4850	3397	2257.27	1534	2351.32
	ENSMUSG00000057244.6	Gm6139	-1.30712	1.6315	24.7065	0.000147423	0.199277	161.13	156.09	100.88	60.94	26.39	45.41
	ENSMUSG00000014813.9	Stc1	-0.79239	3.86764	24.2384	0.000162036	0.208842	549	793.9	480.79	335	209.05	263
	ENSMUSG00000096336.2	Igkv1-135	0.501354	5.87471	24.2851	0.000160506	0.208842	1530.98	1640.95	1607	2167.96	1290.91	1788.89
	ENSMUSG00000040435.12	Ppp1r15a	-0.751939	7.07847	29.1772	0.000167016	0.210369	4128	6639	6088	3373	1750	2625
	ENSMUSG00000024924.14	Vldlr	-0.936519	2.58936	23.5135	0.000188013	0.226519	230	323	217	105	90	109
	ENSMUSG00000104452.1	Ighv8-8	-1.78412	4.46027	49.2109	0.000187733	0.226519	1369.26	1073.9	863.81	229.93	186.43	327.06
	ENSMUSG00000062949.13	Atp11c	-0.581459	4.61836	23.2475	0.0001987	0.234301	943	1065	883	587	418	474
	ENSMUSG00000019929.16	Dcn	-0.494939	5.89234	22.7617	0.00022004	0.244581	2125	2522	2201	1588	967	1195
	ENSMUSG00000032727.14	Mier3	-0.616267	5.61278	22.9794	0.00021308	0.244581	1514	2355	2006	1304	734	912
	ENSMUSG00000068798.10	Rap1a	-0.53244	6.6537	22.7485	0.000220657	0.244581	3206.24	4783.83	3820.95	2528.6	1490.96	2271.15
	ENSMUSG00000004609.11	Cd33	-0.529156	4.9303	22.4161	0.000236801	0.248107	1081	1359	1110	773	470	655
	ENSMUSG00000034761.15	Map4k5	-0.573695	5.18798	22.3946	0.000237894	0.248107	1287.81	1638.64	1374.72	1001.7	543.68	694.92
	ENSMUSG00000036902.11	Neto2	-0.635649	4.696	22.2338	0.000246223	0.248107	1035	1116	943	664	333	563
	ENSMUSG00000039219.18	Arid4b	-0.525196	6.09549	22.2548	0.000245117	0.248107	2268	3069	2643	1717	1226.17	1275
	ENSMUSG00000056071.12	S100a9	-0.494562	7.86873	22.4211	0.000236549	0.248107	8148	10279	8592	5857	3485	5498
	ENSMUSG00000028382.15	Ptbp3	-0.470266	8.27334	21.8876	0.000265296	0.253499	10698	13761	11078	7687	5119	6877
	ENSMUSG00000038332.13	Sesn1	-0.565756	7.36352	21.9761	0.000263321	0.253499	7226	6400	5604	3929	2698	3421
	ENSMUSG00000095704.2	Gm8221	0.902857	2.63952	21.9584	0.000261264	0.253499	153.53	142.62	127.34	275.04	156.27	185.51
	ENSMUSG00000022893.14	Adamts1	-0.52845	5.70291	21.6055	0.000282081	0.261002	2068	2191	1783	1277	909	1026
	ENSMUSG00000039879.9	Heca	-0.489921	6.29924	21.5977	0.000282567	0.261002	3109	3221	2705	1938	1349	1661
	ENSMUSG00000026475.7	Rgs16	0.925979	3.1332	21.0689	0.000320968	0.286909	233.79	180.82	173.63	379.56	178.78	327.67
	ENSMUSG00000089722.2	Cd300ld5	3.65893	-1.74882	21.0707	0.000317304	0.286909	0	3.28	0	12.36	6.57	16.75
	ENSMUSG00000020029.6	Nudt4	-0.498588	6.37312	20.8609	0.000332463	0.287363	2857	3427	3290	2325	1265	1674
	ENSMUSG00000020773.11	Trim47	0.59036	4.50928	20.7673	0.000339485	0.287363	501.51	644.26	648.44	731.25	518.37	822.43
	ENSMUSG00000026565.18	Pou2f1	-0.509909	5.42428	20.7315	0.000342215	0.287363	1686.35	1806.88	1461.33	1055.83	728.37	890.39
	ENSMUSG00000031201.17	Brcc3	-0.563037	4.92661	20.895	0.000329942	0.287363	958	1446	1187	766	501	589
	ENSMUSG00000003031.14	Cdkn1b	-0.515026	6.49288	19.6757	0.000435105	0.296084	3269	4181	3019	2256	1606	1722
	ENSMUSG00000022533.14	Atp13a3	-0.473665	6.0685	20.4819	0.000361964	0.296084	2359	2814	2519	1743	1198	1298
	ENSMUSG00000025915.14	Sgk3	-0.467635	5.83071	19.9122	0.00041204	0.296084	1919	2462	2142	1531	944	1155
	ENSMUSG00000033186.9	Mzt1	-0.587932	4.84461	19.7054	0.000432125	0.296084	957	1439	1020	741	456	544
	ENSMUSG00000033453.8	Adamts15	-1.04324	3.29288	22.6921	0.000403633	0.296084	450	442	390	258	108	125
	ENSMUSG00000035476.9	Tab3	-0.722798	4.71734	21.4546	0.000426764	0.296084	771	1320	1159	652	410	439
	ENSMUSG00000040693.7	Slco4c1	-1.62814	-0.213172	20.3532	0.000372646	0.296084	30	50	35	12	9	7
	ENSMUSG00000041040.12	Fam117b	-0.578596	5.41905	20.1588	0.000389462	0.296084	1877	1677	1454	1069	648	895
	ENSMUSG00000044934.13	Zfp367	-0.711454	4.5592	20.7093	0.000438081	0.296084	736.89	1170.93	990.6	637.91	331	398
	ENSMUSG00000050014.8	Apol10b	0.568695	4.51878	19.8019	0.000422623	0.296084	597	657	561.11	706	548	808
	ENSMUSG00000056054.9	S100a8	-0.466283	7.35512	20.106	0.00039418	0.296084	5304	7195	6305	4046	2505	3940
	ENSMUSG00000074925.4	Ptar1	-0.551157	4.92586	20.1551	0.000389788	0.296084	1228	1301	1015	745	506	610
	ENSMUSG00000075376.10	Rc3h2	-0.451533	5.67251	20.0093	0.000402976	0.296084	1866	2117	1815	1226	857	1174
	ENSMUSG00000076710.2	Ighv1-49	-2.17878	-0.898173	20.4323	0.000366037	0.296084	25	32	15	4	2	6
	ENSMUSG00000095285.2	Ighv5-9	-0.977928	1.77415	19.7709	0.000425644	0.296084	136.13	175	124.22	72	39.01	60
	ENSMUSG00000096150.1	Ighv1-85	-1.06687	2.1158	20.1671	0.000388726	0.296084	124	246.19	201	67	66	70
	ENSMUSG00000039652.16	Cpeb3	-0.81188	2.54228	19.5818	0.000444654	0.296906	191	287	246	122	86	106
	ENSMUSG00000008730.17	Hipk1	-0.489476	7.96395	19.4515	0.000458309	0.297731	8156.72	11050	9667	6691	4289	4773
	ENSMUSG00000061356.13	Nuggc	-1.10025	1.33514	19.4544	0.000458006	0.297731	95	113	118	33	34	48
	ENSMUSG00000096574.7	Gm2956	-6.13221	-2.10889	20.8393	0.000467379	0.297731	16.11	8.71	4.08	0	0	0
	ENSMUSG00000109509.1	Rps12-ps4	-5.79794	-2.32289	20.8621	0.000465186	0.297731	5.07	10.6	7.7	0	0	0
	ENSMUSG00000038235.4	F11r	0.465388	6.0325	19.2761	0.000477447	0.300689	1810	1846	1746	2110	1441	2211
	ENSMUSG00000052353.13	Cemip	0.72931	3.89419	19.1913	0.000487028	0.303276	351	425	326	564	447	371
	ENSMUSG00000048379.9	Socs4	-0.460323	5.93287	19.1299	0.000494097	0.30426	2131	2647	2203	1524	1120	1221
	ENSMUSG00000066319.6	Rtp3	1.1434	0.714885	18.8912	0.000522709	0.318342	29.4	38.42	30.96	54.81	47.47	63.77
	ENSMUSG00000047141.5	Zfp654	-0.570615	4.52062	18.7784	0.000536874	0.323414	957	918	806	544	397	445
	ENSMUSG00000096472.2	Cdkn2d	-0.530221	5.39809	18.6401	0.000554842	0.330644	1350	1848	1728	1172	610	866
	ENSMUSG00000035236.17	Scai	-0.693162	3.44846	18.4533	0.000580188	0.34207	426	530	365	235	183	203
	ENSMUSG00000034297.14	Med13	-0.446542	7.13385	18.3618	0.000593086	0.345994	4916.56	6123.08	4960.18	3683.79	2512.69	2784.15
	ENSMUSG00000029823.16	Luc7l2	-0.430026	7.55009	18.3167	0.000599561	0.346128	7132.12	7221.45	6780.18	4894.24	3183.94	4041.08
	ENSMUSG00000033964.12	Zbtb41	-0.631971	3.83923	18.1813	0.0006195	0.350743	618	595	483	317	227	299
	ENSMUSG00000086000.1	Gm12493	3.35439	-2.11817	18.1765	0.000620213	0.350743	1	1.76	0	8.72	4.73	11.41
	ENSMUSG00000039699.14	Batf2	0.513629	6.00347	17.9371	0.000657353	0.360705	1632	1910	1669	2017	1327	2407
	ENSMUSG00000042903.8	Foxo4	-0.513159	4.64078	17.9518	0.000654998	0.360705	828	1110	956	654	413	489
	ENSMUSG00000050310.9	Rictor	-0.516815	6.08166	18.0066	0.00064632	0.360705	2827	2735	2251	1686	1196	1315
	ENSMUSG00000023845.7	Lnpep	-0.600015	8.57995	19.0725	0.000669445	0.363738	17543	14392	13094	8560	6096	8354
	ENSMUSG00000009207.15	Lnpk	-0.657492	3.17633	17.7083	0.000695223	0.366952	312	406	365	215	142	169
	ENSMUSG00000031167.16	Rbm3	-0.483977	8.69442	17.7273	0.000691996	0.366952	15017	17749.6	14899.4	10687.4	5929.6	9915.02
	ENSMUSG00000076576.2	Igkv6-32	-0.551876	4.22549	17.7551	0.000687289	0.366952	660	738	783	416	342	372
	ENSMUSG00000008193.13	Spib	0.43323	7.86303	17.1076	0.000806953	0.379001	5352	7314	6955	8225	5032	7148
	ENSMUSG00000027763.13	Mbnl1	-0.481116	8.27318	17.2527	0.000778208	0.379001	12769	12047	10524	7500	5455	6513
	ENSMUSG00000028557.10	Rnf11	-0.447805	5.3749	17.4679	0.0007377	0.379001	1502	1772	1441	970	705	973
	ENSMUSG00000029669.14	Tspan12	-1.15707	0.935409	17.4164	0.000747165	0.379001	90	88	68	42	20	24
	ENSMUSG00000030303.15	Far2	-1.09653	3.21544	20.8611	0.000782871	0.379001	544.87	314.58	352.26	162.45	117.78	161.91
	ENSMUSG00000033713.12	Foxn3	-0.456842	6.87364	17.3358	0.000762279	0.379001	4646	4551	4114	3126	2007	2365
	ENSMUSG00000036062.13	Phf24	-0.799958	2.39635	17.112	0.000806071	0.379001	216	245	186	121	77	88
	ENSMUSG00000038172.14	Ttc39b	-0.484492	7.00583	17.211	0.000786352	0.379001	5440	4796	4427	3012	2229	2833
	ENSMUSG00000039968.9	Rsbn1l	-0.428197	6.62423	17.171	0.000794251	0.379001	3681.01	4035.71	3419.47	2558.52	1770.06	2021.85
	ENSMUSG00000042099.16	Kank3	0.506821	5.06705	17.238	0.00078107	0.379001	700	1093	955	1120	830	1012
	ENSMUSG00000062078.15	Qk	-0.42129	6.55359	17.149	0.00079863	0.379001	3293	4031	3290	2518	1627	1945
	ENSMUSG00000072501.5	Phf20l1	-0.459035	6.08009	17.1749	0.000793476	0.379001	2211	3125	2420	1744	1206	1349
	ENSMUSG00000109157.1	Gm44829	-1.68285	0.840232	19.3778	0.000784277	0.379001	129	60	59	24	19	17
	ENSMUSG00000037795.14	N4bp2	-0.464026	4.76209	17.0107	0.000826812	0.383094	954	1164	979	662.18	481	571.38
	ENSMUSG00000039770.6	Ypel5	-0.462227	5.94419	16.9649	0.000836404	0.383094	2417	2405	2177	1511	937	1500
	ENSMUSG00000046985.11	Tapt1	-0.443927	6.57175	16.9863	0.0008319	0.383094	3348	3725	3722	2704	1466	2010
	ENSMUSG00000095682.1	Igkv3-1	-1.21793	1.14217	16.932	0.00084337	0.383118	66	124	103	43	15	40
	ENSMUSG00000014956.15	Ppp1cb	-0.53919	7.26405	17.7965	0.000861565	0.385071	4471	7798.56	5873	3708	2607.72	3147
	ENSMUSG00000037236.16	Matr3	-0.42415	7.15304	16.8758	0.000855408	0.385071	5444.1	5766.3	4825.61	3609.68	2545.7	3019.15
	ENSMUSG00000029581.14	Fscn1	0.412968	8.26012	16.6483	0.000906166	0.401765	8228	9397	8301	9429	7398	9500
	ENSMUSG00000037736.20	Limch1	-0.911977	1.75249	16.5014	0.000940758	0.41279	157	128	133	63	44	65
	ENSMUSG00000055494.5	Gm14168	-2.05818	-1.09251	16.48	0.000945929	0.41279	28	14	18	5	3	3
	ENSMUSG00000038156.16	Spon1	-0.501426	4.45995	16.3174	0.000986228	0.414131	720	980	844	480	381	504
	ENSMUSG00000041685.16	Fcho2	-0.841817	5.53139	22.6008	0.000986365	0.414131	1323	2662.59	1938.78	967	711	811.55
	ENSMUSG00000069609.7	Cd300ld4	-3.03437	-1.54637	16.3487	0.000978318	0.414131	12.14	17.47	15.47	4	0	0
	ENSMUSG00000094872.1	Igkv9-120	-0.569726	4.41165	16.3504	0.000977908	0.414131	644.62	909.1	955.61	446.03	339.91	502.1
	ENSMUSG00000109909.1	Gm45663	-2.1518	-0.929098	16.3258	0.000984097	0.414131	26	32	12	5	1	6
	ENSMUSG00000021831.9	Ero1l	-0.460019	5.31085	16.0898	0.00104594	0.422567	1582	1589	1335	980	680	863
	ENSMUSG00000023249.15	Parp3	0.423162	6.38855	16.039	0.00105983	0.422567	2133	2582	2349	2593	2199	2370
	ENSMUSG00000035992.15	Fnip1	-0.480015	4.80851	16.1119	0.00103997	0.422567	1034	1224	953	734	468	570
	ENSMUSG00000037894.13	H2afz	-0.503829	7.87943	16.2681	0.00105569	0.422567	9130.47	9175.31	8822.63	6250.6	3143.25	5646.9
	ENSMUSG00000045005.9	Fzd5	-0.45937	5.19388	16.0678	0.00105194	0.422567	1333.42	1463.35	1368.11	1021.37	555.77	781.9
	ENSMUSG00000048109.10	Rbm15	-0.458979	5.52911	16.086	0.00104698	0.422567	1559	2009	1709	1120	886	901
	ENSMUSG00000114046.1	Snapc1l	2.91722	-1.21642	17.7879	0.00105655	0.422567	0	3.34	5.57	16.11	24.21	10.97
	ENSMUSG00000002944.15	Cd36	-0.447501	6.36864	15.7668	0.00113784	0.437066	3272	3092	2980	2200	1251	1901
	ENSMUSG00000003882.5	Il7r	-0.423987	6.44849	15.7216	0.0011514	0.437066	3174	3511	3163	2014	1708	1842
	ENSMUSG00000022139.17	Mbnl2	-0.4492	6.45312	15.8069	0.00112595	0.437066	3539	3426	2951	2117	1599	1851
	ENSMUSG00000032238.17	Rora	-0.824645	3.43676	16.7617	0.00113427	0.437066	565	436	336	223	163	198
	ENSMUSG00000038816.14	Ctnnal1	-0.70981	2.70073	15.7355	0.00114723	0.437066	277	274	230	142	98	128
	ENSMUSG00000044573.16	Acp1	-0.504511	5.37241	15.8395	0.00111639	0.437066	1264.5	1738.91	1800.35	1133.61	603.97	888.74
	ENSMUSG00000083405.1	Gm15725	0.602074	3.45726	15.8121	0.00112442	0.437066	259.19	286.98	310.2	345.62	291.89	350.49
	ENSMUSG00000037940.17	Inpp4b	-0.729998	4.71476	18.2551	0.0012029	0.450836	1279	1062	848	544	373	577
	ENSMUSG00000095565.2	Ighv2-9-1	-1.3003	3.13274	21.4342	0.00120394	0.450836	507	318	370	104	130.95	132
	ENSMUSG00000049800.13	Sertad2	-0.420038	5.82151	15.4926	0.00122309	0.454931	2189	2173	1986	1484	962	1222
	ENSMUSG00000000787.12	Ddx3x	-0.486709	8.35552	15.4095	0.00125032	0.461961	13931.3	12400.8	11084	8603	5290.57	6885.07
	ENSMUSG00000103382.1	Gm37755	-1.39412	0.248892	15.3396	0.00127375	0.467501	72	43	39	14	14	17
	ENSMUSG00000009418.16	Nav1	0.428024	5.58886	15.1236	0.00134943	0.470654	1271	1342.97	1421	1712.96	1164	1294
	ENSMUSG00000021690.10	Jmy	-0.503601	4.81978	15.0287	0.00138425	0.470654	867	1219	1186	724	505	528
	ENSMUSG00000021775.11	Nr1d2	-0.393581	5.91513	15.0941	0.00136013	0.470654	2142	2373.99	2224.99	1451	1144	1314
	ENSMUSG00000023473.13	Celsr3	-0.939683	1.30617	15.184	0.00132777	0.470654	102	117	89	45	28	51
	ENSMUSG00000024675.19	Ms4a4c	0.409752	8.09142	15.0376	0.00138094	0.470654	6249.3	8987.4	7996.38	8954.96	6095.9	8553.87
	ENSMUSG00000030623.4	Prss23os	2.67887	-1.57631	15.1341	0.00134563	0.470654	2.87	0	4.4	19.96	10.34	7.76
	ENSMUSG00000030660.9	Pik3c2a	-0.616341	4.56965	15.7694	0.00134433	0.470654	1113.82	887.39	793.27	524.5	395.55	486.43
	ENSMUSG00000034371.9	Tkfc	0.575527	3.88952	15.0536	0.00137502	0.470654	300.57	442.56	434.06	547.81	376.13	412.68
	ENSMUSG00000042046.15	Dstyk	-0.450207	4.89941	15.1906	0.00132542	0.470654	1042.44	1257.36	1093.16	815.59	501.74	596.25
	ENSMUSG00000042474.6	Fcmr	0.386979	7.77474	15.2067	0.00131972	0.470654	6161	6613	5903	6997	5255	6434
	ENSMUSG00000050029.7	Rap2c	-0.419254	6.28177	15.0765	0.00136658	0.470654	2998	3143	2606	1882	1278	1889
	ENSMUSG00000094796.2	BC147527	0.365975	6.33523	15.0691	0.00136931	0.470654	2104	2504.98	2350.98	2766.99	1759.99	2386.98
	ENSMUSG00000002996.17	Hbp1	-0.404459	6.42299	14.9965	0.00139631	0.471857	2798.56	3802.94	3071.72	2350.87	1443.12	1825.31
	ENSMUSG00000063406.11	Tmed5	-0.398994	6.63307	14.8849	0.00143903	0.476262	3518.7	4326.03	3297.93	2393.84	1713.27	2363.67
	ENSMUSG00000063663.11	Brwd3	-0.555498	3.81075	14.9109	0.00142895	0.476262	519	637	483	365	224	270
	ENSMUSG00000096844.1	Igkv6-14	-0.978532	1.8294	14.8729	0.00144371	0.476262	107.56	155.19	191.03	61	37.02	79.52
	ENSMUSG00000098374.1	Gm28043	-0.491926	5.7916	15.0096	0.00142503	0.476262	2214.82	2107.75	2020.28	1589.71	876.29	1053.09
	ENSMUSG00000000581.8	C1d	-0.492059	4.41671	14.7206	0.0015046	0.47963	838	903	706	519	362	456
	ENSMUSG00000015950.13	Ncf1	0.450979	7.29229	14.7632	0.00148728	0.47963	3252.79	5259.25	4657.99	5502.9	3611.06	4624.47
	ENSMUSG00000024190.7	Dusp1	-0.522259	7.67873	15.6964	0.00149931	0.47963	9131	7500	6958	5061	3379	4309
	ENSMUSG00000056476.13	Med12l	-0.681805	3.67113	14.7836	0.00149672	0.47963	614.69	476.18	428.7	300.85	203.63	230
	ENSMUSG00000068105.11	Tnfrsf13c	0.365799	6.07769	14.7562	0.00149013	0.47963	1787	2033	1995	2302	1522	1942
	ENSMUSG00000070348.5	Ccnd1	0.406392	6.66509	14.7102	0.00150887	0.47963	2315.69	3299.01	3035.71	3461.51	2431.6	2839.76
	ENSMUSG00000100826.6	Snhg14	-1.68075	1.74421	19.6846	0.0015145	0.47963	240.03	124.38	111.85	52.75	35.25	28.01
	ENSMUSG00000017548.15	Suz12	-0.403878	6.86027	14.4267	0.00163055	0.480675	3952	4620	4476	3347	1924	2367
	ENSMUSG00000020230.15	Prmt2	0.601412	3.33472	14.4455	0.00162217	0.480675	227	319	245	319	244	351
	ENSMUSG00000026436.15	Elk4	-0.377805	7.01876	14.6375	0.00153908	0.480675	4786	5052	4572	3514	2226	2831
	ENSMUSG00000026726.10	Cubn	-1.02213	0.576549	14.5606	0.00157174	0.480675	60.4	62	62	28.48	19	22.27
	ENSMUSG00000028645.11	Slc2a1	-0.443492	5.95742	14.5674	0.00156884	0.480675	2486	2506.99	2033	1656	1045	1296.99
	ENSMUSG00000029607.14	Ankrd61	-1.20007	0.995122	14.5484	0.001577	0.480675	51.01	113.04	99.03	43.04	24	20.02
	ENSMUSG00000031197.11	Vbp1	-0.451972	5.46786	14.5691	0.00156809	0.480675	1301	2051	1721	1057	745	1022
	ENSMUSG00000031278.12	Acsl4	-0.493908	5.43264	14.4895	0.0016027	0.480675	1877	1600	1453	1088	709	921
	ENSMUSG00000037851.13	Iars	0.372075	6.58511	14.4624	0.00161467	0.480675	2426.97	2853.94	2973.97	3026.9	2244.95	2894
	ENSMUSG00000038174.14	Fam126b	-0.656557	3.02784	14.4559	0.00161755	0.480675	291.9	394	290.8	199.93	131	143
	ENSMUSG00000042842.11	Serpinb6b	0.360396	6.42772	14.4299	0.00162915	0.480675	2243	2797	2406	2787	1907	2640
	ENSMUSG00000051390.10	Zbtb22	-0.416969	5.05411	14.4384	0.00162534	0.480675	1235	1311	1183	875	536	753
	ENSMUSG00000107715.1	Gm44135	-1.80786	-0.810891	14.5093	0.00159399	0.480675	24	37	13	6	3	7
	ENSMUSG00000066324.2	Impad1	-0.525357	5.11604	14.5808	0.0016618	0.487294	1548	1284	1157	818	566	764
	ENSMUSG00000000489.7	Pdgfb	0.784509	4.31303	16.8472	0.00186228	0.493638	298	590	567	679	515	700
	ENSMUSG00000004591.16	Pkn2	-0.452132	6.15784	13.8684	0.00190418	0.493638	2170	3212	2796	1934	1281	1342
	ENSMUSG00000005268.20	Prlr	-1.28496	0.211537	14.0317	0.0018191	0.493638	56	51	41	14	9	24
	ENSMUSG00000009470.17	Tnpo1	-0.36181	7.09527	13.81	0.00193571	0.493638	4556.79	5861.61	4783.52	3357.32	2534.63	3113.68
	ENSMUSG00000018387.12	Shroom1	-1.96043	-1.25803	14.1036	0.00178301	0.493638	21	18	13	2	3	5
	ENSMUSG00000020990.5	Cdkl1	-1.04763	0.721738	14.0543	0.00180767	0.493638	54.92	73.45	78.77	26	17	33.93
	ENSMUSG00000021280.9	Exoc3l4	0.501751	4.12949	14.2245	0.00172419	0.493638	492.21	491.74	435.81	558.34	439.1	540.58
	ENSMUSG00000022754.6	Tmem45a	-1.14256	0.572082	13.9472	0.00186258	0.493638	59	73	57	29	10	28
	ENSMUSG00000024294.14	Mib1	-0.407285	5.24778	13.8183	0.00193119	0.493638	1398	1563	1298	965	688	807
	ENSMUSG00000024401.14	Tnf	0.523952	4.32679	14.274	0.00170069	0.493638	489	607	527	755	383	684
	ENSMUSG00000024640.9	Psat1	0.362785	5.94837	13.8918	0.00189172	0.493638	1597	1879	1851	2038	1332	1908
	ENSMUSG00000025997.13	Ikzf2	-0.579279	3.79605	14.1298	0.00177008	0.493638	574	590	461	331	246	255
	ENSMUSG00000026721.16	Rabgap1l	-0.417692	6.36367	14.139	0.00176556	0.493638	3122.94	3395.96	2744.87	2294	1323	1768.88
	ENSMUSG00000027011.14	Ube2e3	-0.481772	4.68366	13.8741	0.00190115	0.493638	1002	944	983	686	373	582
	ENSMUSG00000029610.13	Aimp2	0.49326	4.25824	14.0246	0.00182273	0.493638	420.96	576.51	572.97	609.7	442.09	636.97
	ENSMUSG00000031389.17	Arhgap4	0.389882	6.13574	13.7902	0.00194652	0.493638	1700.98	2270.52	2049.9	2358.84	1737.74	1901.58
	ENSMUSG00000034158.9	Lrrc58	-0.432798	5.72197	13.8126	0.00193433	0.493638	2065.13	2159.78	1728.41	1273.37	984.21	1110.73
	ENSMUSG00000035310.15	Lin54	-0.757186	4.34251	16.5019	0.00185836	0.493638	606	994	923	530	312	300
	ENSMUSG00000035429.13	Ptprh	1.24118	-0.113711	14.2429	0.00171542	0.493638	18	15	18	43	20	32
	ENSMUSG00000036853.5	Mcoln3	0.747285	2.84071	13.7827	0.00195065	0.493638	139	204	185	206	230	222
	ENSMUSG00000044317.7	Gpr4	0.663503	2.48807	13.7866	0.00194854	0.493638	134	156	135	189	134	194
	ENSMUSG00000046101.16	Mcmdc2	-0.96966	1.57738	14.074	0.00179781	0.493638	158	122	93	62	35	52
	ENSMUSG00000047446.18	Arl4a	-0.57059	5.99199	15.7548	0.0019059	0.493638	1864	3015	2677	1757	886	1299
	ENSMUSG00000047879.17	Usp14	-0.438757	5.86678	13.8985	0.00188818	0.493638	1736.25	2563.18	2356.07	1619.55	929.63	1234.36
	ENSMUSG00000053774.9	Ubxn7	-0.602296	6.42111	16.7431	0.00176694	0.493638	3929	3347	2815	2170	1346	1657
	ENSMUSG00000055639.16	Dach1	-0.965804	1.12778	13.8675	0.0019047	0.493638	95	101	76	51	27	30
	ENSMUSG00000057722.17	Lepr	-0.502354	4.50734	14.0834	0.00179311	0.493638	850	1033	739.47	581	394	443
	ENSMUSG00000076434.9	Wfdc3	-2.28725	-1.43436	14.194	0.0017388	0.493638	6	22	19	2	2	3
	ENSMUSG00000102496.1	Gm36989	-1.76052	-0.817438	13.9549	0.0018586	0.493638	24	33	16	6	7	3
	ENSMUSG00000106858.1	Gm43844	-2.4744	-1.49252	13.9609	0.00185547	0.493638	15	12	18	4	2	0
	ENSMUSG00000091903.8	Gm6460	-5.66963	-2.42329	14.4835	0.00200557	0.502945	13.15	4.67	2.93	0	0	0
	ENSMUSG00000095427.2	Rps2-ps6	-0.708377	2.78362	13.6896	0.00200258	0.502945	277.13	305.28	247.41	164.48	79.57	153.81
	ENSMUSG00000017291.13	Taok1	-0.395518	6.45519	13.6182	0.00204344	0.507678	3434	3446.99	2903	2213	1534	1984
	ENSMUSG00000026192.13	Atic	0.379446	6.33937	13.6036	0.00205193	0.507678	1888	2591	2489	2692	1890	2335
	ENSMUSG00000082969.1	Gm12630	-2.0988	-1.44673	13.6175	0.00204387	0.507678	19	14	12	5	1	2
	ENSMUSG00000087141.1	Plcxd2	-0.631946	3.75008	13.5393	0.00208972	0.514731	632	524	431	305	227	257
	ENSMUSG00000094105.7	Gm8922	-4.46423	-2.31765	13.4822	0.00212394	0.518551	14.64	5.49	2.63	0.5	0	0
	ENSMUSG00000095918.7	Gm5861	-5.29203	-2.64325	14.2775	0.00211475	0.518551	4.41	4.09	7.66	0	0	0
	ENSMUSG00000020573.17	Pik3cg	-0.403911	6.33515	13.3969	0.00217632	0.521486	3187	3009	2815	1904	1382	1965
	ENSMUSG00000025059.16	Gk	-0.608641	4.06873	13.5953	0.00217505	0.521486	773	655	543	389	235	386
	ENSMUSG00000030787.4	Lyve1	-0.787011	2.63631	13.4271	0.00215761	0.521486	235	347	187	127	104	105
	ENSMUSG00000047789.5	Slc38a9	-0.415427	5.80635	13.4229	0.00216019	0.521486	1803	2312.13	2201	1605.33	930	1121
	ENSMUSG00000057181.15	5730455P16Rik	-0.477064	4.26665	13.3861	0.00218301	0.521486	733	746	713	495	342	373
	ENSMUSG00000020284.16	Cfap410	-0.672567	2.96207	13.3545	0.00220284	0.523963	354	307	265	177	126	145
	ENSMUSG00000000903.3	Vpreb3	0.591778	3.34647	13.3004	0.00223729	0.526711	291	252	248	354	231	341
	ENSMUSG00000019437.17	Tlcd1	-0.541863	3.92841	13.2297	0.00228315	0.526711	474.15	666.53	637.7	422.66	231.52	289.49
	ENSMUSG00000019818.15	Cd164	-0.379292	8.49121	13.1497	0.0023364	0.526711	13538	13908	12544	8974	6136	8608
	ENSMUSG00000021733.11	Slc4a7	-0.574128	4.98319	14.3013	0.00231204	0.526711	1451	1228	1009	717	547	642
	ENSMUSG00000026012.2	Cd28	-0.56949	4.5214	13.5761	0.00229277	0.526711	1045	846	778	506	414	459
	ENSMUSG00000026977.17	2007-03-01	-0.395725	6.1247	13.2778	0.00225184	0.526711	2576	2856	2369	1891	1255	1412
	ENSMUSG00000030468.12	Siglecg	0.349375	7.42162	13.1554	0.00233255	0.526711	4500	5418	4965.86	6001	3854	4731
	ENSMUSG00000031497.9	Tnfsf13b	-0.657683	2.64621	13.1875	0.00231109	0.526711	249	266	228	124	96	141
	ENSMUSG00000038212.16	Mfsd14b	-0.368507	5.83531	13.2406	0.00227604	0.526711	1996	2331	2012	1570	966	1255
	ENSMUSG00000043929.16	Klhl15	-0.588697	3.38753	13.2186	0.00229048	0.526711	412	435	379	207	164	254
	ENSMUSG00000056537.11	Rlim	-0.475018	6.84784	13.8398	0.00228694	0.526711	5023	4269	3798	2765	1934	2592
	ENSMUSG00000094102.1	Ighv9-2	-1.37783	0.924575	14.4627	0.00223017	0.526711	84.06	51	118	24	15	37
	ENSMUSG00000096422.2	Igkv12-44	-0.81743	5.23185	18.2401	0.00233794	0.526711	1312.37	1685.11	1730.48	560	576.78	887.07
	ENSMUSG00000006262.15	Mob1b	-0.491936	5.27439	13.1593	0.00247544	0.540318	1668	1555	1201	980	627	833
	ENSMUSG00000021712.15	Trim23	-0.497001	3.9193	13.0333	0.00241644	0.540318	520	665	556	414	234	306
	ENSMUSG00000022708.16	Zbtb20	-0.380509	5.38563	12.9817	0.00245286	0.540318	1539	1640	1465	1008	751	975
	ENSMUSG00000029026.16	Trp73	-1.61852	-0.99916	12.924	0.00249438	0.540318	15	28	19	4	5	6
	ENSMUSG00000029265.4	Dr1	-0.395441	6.17946	12.9339	0.00248717	0.540318	2725	3029	2349	1967	1190	1613
	ENSMUSG00000076539.3	Igkv4-81	-1.88126	-1.09072	12.9443	0.00247967	0.540318	10	33	17	5	4	3
	ENSMUSG00000091337.3	Eid1	-0.46712	4.87409	12.9686	0.00246219	0.540318	838.27	1376.88	1160.77	725.18	473.16	667.36
	ENSMUSG00000091509.7	Gm17066	-0.680522	2.93345	12.9603	0.00246819	0.540318	331.67	305.64	273.78	163.22	97.5	182.8
	ENSMUSG00000099875.1	Rbm3-ps	-0.524043	4.68988	13.0172	0.00247542	0.540318	962.86	984.8	1036.57	752.56	336.81	546.76
	ENSMUSG00000118138.1	Gm50322	-1.04205	1.09561	12.922	0.00249583	0.540318	82	99	90	51	30	20
	ENSMUSG00000021585.10	Cast	-0.350503	6.33559	12.903	0.00250965	0.541196	2595.23	3303.12	3043.36	2207.97	1395.33	1790.97
	ENSMUSG00000066543.8	Rpl17-ps9	-3.42306	-2.11673	12.8724	0.00253216	0.543934	11.47	3.73	11.75	1.61	0.07	0
	ENSMUSG00000023456.15	Tpi1	-0.480095	6.99552	13.6431	0.00257098	0.55014	3822.84	6444.34	4530.37	3300.88	2203.92	2559.85
	ENSMUSG00000020130.9	Tbc1d15	-0.391741	5.72027	12.7657	0.0026124	0.55479	1982	2179	1722	1381	923	1147
	ENSMUSG00000029922.15	Mkrn1	-0.36218	7.54288	12.741	0.00263134	0.55479	5742.23	7883.87	7146.64	5050.52	3123.5	4256.97
	ENSMUSG00000036469.16	2001-03-01	-0.382607	6.24302	12.7602	0.00261655	0.55479	2610.96	3259	2592	1742	1457.08	1717
	ENSMUSG00000075470.2	Alg10b	-0.400757	5.44368	12.739	0.00263285	0.55479	1619	1752	1495	1106	819	892
	ENSMUSG00000093798.2	Gm8355	0.625075	5.17675	14.8834	0.00264276	0.55479	664.12	1183.84	984.99	1082.33	1006.44	1175.3
	ENSMUSG00000084289.1	Gm6977	0.553791	3.89222	12.6972	0.00266538	0.557426	425.18	374.94	375.01	432.82	367.31	522.34
	ENSMUSG00000020300.14	Cpeb4	-0.801931	6.20792	18.2582	0.00285037	0.565925	2103	4045	3224	1782	1095	1215
	ENSMUSG00000021018.8	Polr2h	0.481191	3.82855	12.5267	0.0028027	0.565925	364	410	391	467	305	484
	ENSMUSG00000022544.14	Eef2kmt	0.514116	3.97001	12.5358	0.00279517	0.565925	324.66	495.33	457.76	490	405.22	482.34
	ENSMUSG00000026739.13	Bmi1	-0.375359	5.6986	12.5289	0.00280095	0.565925	1808	2216	1760	1244	897	1274
	ENSMUSG00000027845.15	Dclre1b	-0.425636	4.55628	12.4591	0.00285943	0.565925	813.34	955.16	883.34	655.37	384.6	487.06
	ENSMUSG00000028459.11	Cd72	0.3494	6.87316	12.466	0.00285355	0.565925	2903.34	3909.31	3392.14	3654.58	2595.76	3690.14
	ENSMUSG00000037475.15	Thoc2	-0.381887	5.9419	12.5586	0.00277643	0.565925	2190	2621	2046	1588	1143	1288
	ENSMUSG00000042404.16	Dennd4b	0.34577	6.80287	12.5127	0.00281439	0.565925	2822	3469	3419	3687	2652	3082
	ENSMUSG00000050628.6	Ubald2	-0.37336	6.75967	12.6049	0.00273877	0.565925	3949.34	4206.23	3871.76	2882.17	1666.21	2680.01
	ENSMUSG00000052155.5	Acvr2a	-0.691022	3.21161	12.4727	0.00284789	0.565925	458.75	315.71	327.5	215.03	132.23	187.15
	ENSMUSG00000053137.7	Mapk11	0.465572	4.18855	12.5905	0.00275039	0.565925	416	585	513	561	454	569
	ENSMUSG00000058624.13	Gda	-0.642896	6.64657	15.8849	0.0028694	0.565925	2713	5028	4435	2478	1542	1927
	ENSMUSG00000063415.12	Cyp26b1	-0.450752	4.6106	12.4806	0.00284121	0.565925	905	944	917	698	379	500
	ENSMUSG00000076709.2	Ighv1-47	-1.16599	1.94151	14.2008	0.00281954	0.565925	139	218	156	37	45	90
	ENSMUSG00000089854.2	Gm16133	-2.1952	-0.835819	13.4004	0.00281683	0.565925	44.98	14.77	14.74	4.23	2.2	6.2
	ENSMUSG00000113831.1	Gm49602	-0.959529	4.14669	17.3204	0.00276897	0.565925	992	649	617	391	227	295
	ENSMUSG00000049470.13	Aff4	-0.402871	6.64746	12.418	0.00289448	0.566801	4035	3872	3283	2495	1843	2160
	ENSMUSG00000049723.14	Mmp12	-1.18054	1.13496	12.9258	0.00290452	0.566801	138	77	67	30	29	37
	ENSMUSG00000071552.5	Tigit	-0.671039	2.32395	12.4297	0.00288449	0.566801	185	224	187	104	70	114
	ENSMUSG00000049516.9	Spty2d1	-0.358283	6.00747	12.3806	0.00292681	0.567156	2217.7	2559.51	2341.82	1714.72	1202.64	1332.78
	ENSMUSG00000102973.1	E430014B02Rik	-1.39527	0.337952	12.7644	0.00291792	0.567156	83	42	39	19	17	12
	ENSMUSG00000102840.1	Gm38037	-1.36582	0.128569	12.3654	0.00294008	0.567743	51.69	54.72	35.09	26.09	5.2	12.19
	ENSMUSG00000027177.14	Hipk3	-0.367062	6.46208	12.3308	0.00297058	0.569981	3373	3458	2922	2236	1565	2019
	ENSMUSG00000083669.5	Gm10169	0.635296	2.62647	12.3289	0.00297224	0.569981	133.33	186.13	156.49	206.15	170.13	182.47
	ENSMUSG00000086117.1	Gm12065	1.31686	-0.581872	12.305	0.00299354	0.572086	10	13	12	30	21	16
	ENSMUSG00000050493.8	Fam167b	0.712421	2.03572	12.2871	0.00300957	0.573172	100	99	103	155	87	144
	ENSMUSG00000020142.12	Slc1a4	0.56863	3.22128	12.2081	0.00308146	0.579363	215	273	251	275	228	331
	ENSMUSG00000020653.12	Klf11	-0.464327	4.06387	12.2252	0.00306575	0.579363	586	651	664	461	266	341
	ENSMUSG00000039285.12	Azi2	-0.332273	7.39157	12.1837	0.00310405	0.579363	5655	6754	6058	4633	2921	3749
	ENSMUSG00000039783.15	Kmo	0.329003	6.02456	12.2181	0.00307229	0.579363	1772	2004	1908	2125	1449	1915
	ENSMUSG00000100183.1	Gm28512	-1.63696	-0.525178	12.203	0.00308623	0.579363	12	39	40	11	6	5
	ENSMUSG00000109062.1	Gm44622	5.01046	-2.97291	12.8334	0.00310479	0.579363	0	0	0	3	4	3
	ENSMUSG00000076646.3	Ighv2-6-8	-1.2174	-0.379746	12.1597	0.00312655	0.581465	29	37	28	14	7.05	10
	ENSMUSG00000025060.15	Slk	-0.357747	6.58605	12.1428	0.00314238	0.582455	3300	3885	3455	2648	1762	1960
	ENSMUSG00000030782.16	Tgfb1i1	0.423481	4.79454	12.119	0.00316493	0.582737	654	895	795	818	661	908
	ENSMUSG00000038357.10	Camp	-0.622582	3.93217	12.587	0.00316275	0.582737	533	720	569	445	178	308
	ENSMUSG00000027499.12	Pkia	-0.687062	2.45851	12.1011	0.00318206	0.583951	246	219	188	129	76	111
	ENSMUSG00000045664.5	Cdc42ep2	0.479829	4.72824	12.0812	0.00320115	0.585514	707	736	731	836	526	994
	ENSMUSG00000002319.16	Ipo4	0.335527	5.87717	12.0502	0.00323118	0.589064	1538.05	1867.32	1722.52	1837.09	1338.38	1773.39
	ENSMUSG00000036197.16	Gxylt1	-0.460258	5.03092	12.0336	0.00324746	0.590091	1402.91	1204.51	1086.44	781.82	576.32	711.4
	ENSMUSG00000029836.15	Cbx3	-0.410667	6.15873	12.0113	0.00326939	0.592134	2015.07	3309.93	2779.84	1840.96	1207.1	1604.94
	ENSMUSG00000050549.8	Fam241a	-0.40514	5.55929	11.9617	0.00331875	0.599115	1416	2028	1875	1222	722	1155
	ENSMUSG00000113184.1	Gm49654	-0.766986	1.6183	11.9089	0.00337226	0.6068	123	112	133	70	41	57
	ENSMUSG00000037161.14	Mgarp	-1.16725	0.441843	11.7745	0.00351287	0.626002	66	67	39	24	21	13
	ENSMUSG00000045210.8	Vcpip1	-0.374899	7.44723	11.7754	0.00351195	0.626002	5513.57	7819.22	6199.44	4515.39	3310.64	3606.49
	ENSMUSG00000074743.4	Thbd	-0.41056	5.19664	11.7749	0.00351246	0.626002	1237	1584	1308	779	676	898
	ENSMUSG00000030629.15	Zfand6	-0.349298	5.87466	11.7389	0.00355119	0.630803	1965	2469	2055	1414	1027	1456
	ENSMUSG00000042453.14	Reln	-0.725957	1.7963	11.7265	0.00356465	0.631171	113	153	151	76	55	61
	ENSMUSG00000021969.8	Zdhhc20	-0.409063	5.3871	11.6944	0.00359987	0.635304	1664	1653	1362	1112	723	888
	ENSMUSG00000028676.17	Srsf10	-0.334513	7.13489	11.6765	0.00361966	0.635304	5160.52	5484.93	4771.02	3680.47	2538.1	3184.59
	ENSMUSG00000041828.15	Abca8a	-1.15181	0.151777	11.6693	0.00362765	0.635304	60	35	42	19	12	17
	ENSMUSG00000101741.1	Gm28055	-5.1007	-2.75501	12.2658	0.00363385	0.635304	6	3	5	0	0	0
	ENSMUSG00000026751.14	Nr5a1	0.389826	5.11408	11.6384	0.00366207	0.636225	1010	1019	913	1077	780	1110
	ENSMUSG00000055531.12	Cpsf6	-0.333558	6.58704	11.6483	0.00365102	0.636225	3228	4065	3295	2545	1741	2148
	ENSMUSG00000037111.9	Setd7	-0.358593	6.65785	11.623	0.00367946	0.637247	3656	4046	3465	2697	1899.93	2073
	ENSMUSG00000043881.9	Kbtbd7	-0.546315	3.81439	11.6005	0.00370501	0.639675	437.18	681.12	530.34	363.63	250.3	243.2
	ENSMUSG00000003746.16	Man1a	-0.354916	7.01064	11.5642	0.00374657	0.642164	4983	4855.81	4359.11	3229.93	2278	3049
	ENSMUSG00000008307.11	1700109H08Rik	-1.20524	2.41623	14.4383	0.0038353	0.642164	322.47	183.18	201	118	66	57
	ENSMUSG00000011263.16	Exoc3l2	0.96297	0.540603	11.501	0.00382014	0.642164	22	37	36	53	44	43
	ENSMUSG00000026434.12	Nucks1	-0.339741	7.26278	11.5224	0.00379505	0.642164	5631	5886	5350	4214	2548	3580
	ENSMUSG00000030157.5	Clec2d	0.372263	7.94512	11.5602	0.00375112	0.642164	6237	7872	7124	7492	5179	8452
	ENSMUSG00000033487.14	Fndc3a	-0.37878	7.93307	11.4962	0.00382585	0.642164	9717	9364	8020	6297	4237	5574
	ENSMUSG00000034274.11	Thoc5	0.385374	4.80766	11.4914	0.00383144	0.642164	666	879	854	897	643	854
	ENSMUSG00000044678.11	Ly6k	1.05513	1.4018	11.9607	0.00377742	0.642164	69	47.97	49	75	105	76.99
	ENSMUSG00000105606.1	Igkv2-109	-0.64571	3.57591	11.7926	0.00382278	0.642164	395.91	491	539	192	199	296.92
	ENSMUSG00000113334.1	D030007L05Rik	1.76723	-1.44672	11.5127	0.00380635	0.642164	2	7	5	11	9	17
	ENSMUSG00000025804.5	Ccr1	-0.438837	4.54982	11.4713	0.00385531	0.64357	940	896	799	595	419	482
	ENSMUSG00000020397.15	Med7	-0.362657	5.06661	11.4367	0.0038967	0.644152	1225	1305	1171	860	597	756
	ENSMUSG00000020893.17	Per1	-0.546353	6.69722	13.4311	0.00391691	0.644152	4752	3867	3399	2574	1732	2076
	ENSMUSG00000048120.16	Entpd1	-0.40065	5.86719	11.4344	0.00389953	0.644152	2192	2284	2047	1245	1030	1503
	ENSMUSG00000071252.6	2210408I21Rik	-1.07251	-0.015446	11.437	0.00389636	0.644152	42	41	37	16	10	18
	ENSMUSG00000073079.6	Srp54a	-0.37136	5.55471	11.4205	0.00391635	0.644152	1699.74	1791.96	1715.83	1109.35	782.18	1211.11
	ENSMUSG00000020650.15	Bcap29	-0.365413	5.28547	11.3895	0.00395412	0.646434	1425	1508	1379	992	637	961
	ENSMUSG00000021952.16	Xpo4	-0.371489	5.32888	11.3944	0.00394809	0.646434	1344.8	1580.38	1539.21	1096.57	734.57	815.31
	ENSMUSG00000046699.14	Slitrk4	-2.46623	-1.91601	11.3748	0.00397221	0.647482	8	18	5	2	1	1
	ENSMUSG00000032551.7	1110059G10Rik	-0.464694	3.77886	11.3571	0.00399398	0.649121	498	561	500	356	205	316
	ENSMUSG00000017418.14	Arl5b	-0.409737	4.48809	11.3383	0.00401735	0.65101	841	907	763	534	392	524
	ENSMUSG00000030403.9	Vasp	0.3437	7.91683	11.3174	0.00404359	0.651354	6346	7510	7162	7186	5391	7836
	ENSMUSG00000059142.16	Zfp945	-0.513799	4.12923	11.3248	0.00403428	0.651354	777	650.9	574	406	288	391
	ENSMUSG00000107045.1	Gm43636	-1.54508	-0.661403	11.3085	0.00405473	0.651354	39	23	17	7	4	10
	ENSMUSG00000095865.1	Gm13237	-0.714342	2.27095	11.2708	0.00410261	0.657141	137.45	227.94	219.05	121.77	67.09	84.99
	ENSMUSG00000110195.1	Pde2a	-0.680393	3.13157	11.2956	0.00412742	0.65921	358.18	348.81	341.52	259.34	123.85	129.64
	ENSMUSG00000039361.11	Picalm	-0.338669	8.23592	11.2406	0.00414133	0.659531	10326	11745	11116	8469	4974	6903
	ENSMUSG00000095595.2	Fam177a	-0.656847	5.09956	13.7603	0.00421901	0.669976	1602.49	1256.31	1224.34	642.11	536.71	817.49
	ENSMUSG00000004266.15	Ptpn6	0.448913	8.35424	11.5013	0.00428202	0.675637	6541.91	10988.7	10015.6	10311.6	8141.58	9912.52
	ENSMUSG00000024759.14	Atl3	-0.320485	7.10239	11.1215	0.00429847	0.675637	4745	5226	5054	3857	2345	3111
	ENSMUSG00000033777.4	Tlr13	-0.393056	5.35104	11.1099	0.00431408	0.675637	1562	1620	1365	1074	756	827
	ENSMUSG00000037818.16	Abhd18	-0.711505	2.43465	11.1316	0.00428482	0.675637	241.86	229.54	175.71	141.49	78.31	87.85
	ENSMUSG00000061455.13	Stx17	-0.386394	5.02621	11.1088	0.00431561	0.675637	1176	1312	1141	926	548	675
	ENSMUSG00000090115.7	Usp49	-0.533349	4.69677	11.6861	0.00435035	0.679156	867.76	1093.4	1060.5	776.71	412	429.33
	ENSMUSG00000025384.15	Faap100	0.451714	4.10637	11.0338	0.00441846	0.680209	384	499	552	581	389	536
	ENSMUSG00000032496.7	Ltf	-0.471676	4.57357	11.0424	0.00440644	0.680209	806	994	924	718	332	488
	ENSMUSG00000040354.14	Mars	0.350273	6.15069	11.0397	0.00441028	0.680209	1730	2240	2204	2102	1676	2204
	ENSMUSG00000073639.6	Rab18	-0.343246	5.94061	11.0458	0.00440183	0.680209	2037	2575	2170	1594	991	1541
	ENSMUSG00000086513.3	9130208D14Rik	-0.674989	2.26474	11.0426	0.00440629	0.680209	203.86	194.95	170.06	116.98	60.89	100.89
	ENSMUSG00000028080.16	Lrba	-0.455463	4.6412	10.9818	0.00449144	0.685651	971	938	914	660	467	452.51
	ENSMUSG00000032484.8	Ngp	-0.593521	6.27794	13.562	0.00449878	0.685651	2783	3417	3011	2336	977	1498
	ENSMUSG00000035293.13	G2e3	-0.527803	4.16788	11.0099	0.0044887	0.685651	495	883	727	474	300	338
	ENSMUSG00000036707.16	Cab39	-0.3141	6.97572	10.9671	0.00451222	0.685651	4522	4824	4375	3275	2253	2966
	ENSMUSG00000041912.12	Tdrkh	0.929394	0.962138	10.9486	0.00453869	0.685651	26.18	56.6	48.19	60.57	54.16	73
	ENSMUSG00000052040.10	Klf13	-0.354654	7.7307	10.9302	0.00456515	0.685651	8164	7766	7449	5767	3737	4645
	ENSMUSG00000061742.12	Slc22a12	1.90522	-1.87683	10.9381	0.00455368	0.685651	3.34	2	3.37	11	6.5	8.67
	ENSMUSG00000064356.3	mt-Atp8	-1.50899	7.58926	24.379	0.00456139	0.685651	9969	10789	7275	2732	1410	3604
	ENSMUSG00000096078.2	Ighv1-62-2	-0.856354	2.24719	11.2585	0.00453302	0.685651	172.22	257.54	164.62	63.92	64.97	119.11
	ENSMUSG00000081534.3	Slc48a1	-0.357859	5.75975	10.9031	0.00460433	0.689666	1624	2196	2198	1374	916	1312
	ENSMUSG00000035597.19	Prpf39	-0.31443	6.38739	10.8774	0.00464198	0.693432	2930.5	3310.65	2896.62	2138.43	1536.27	1956.66
	ENSMUSG00000098120.1	Gm5914	-1.20849	0.132444	10.8508	0.00468132	0.697428	63.78	33.96	38.51	19.13	8.55	18.82
	ENSMUSG00000022594.14	Lynx1	0.438336	4.83027	10.8343	0.00470592	0.699214	725	822	831	1147	548	831
	ENSMUSG00000024480.9	Ap3s1	-0.44627	4.25048	10.805	0.00474977	0.701042	645.76	890	629.46	435.95	323.42	452.03
	ENSMUSG00000024524.17	Gnal	-0.76992	2.83512	11.225	0.00476882	0.701042	352.21	276.31	237.72	193.76	79.66	130.77
	ENSMUSG00000043243.15	Fam129c	0.393531	5.88542	10.7991	0.0047588	0.701042	1540	1720.27	1772.07	2243.7	1110.77	1825.28
	ENSMUSG00000062031.13	Pgghg	0.437354	4.11265	10.7938	0.00476674	0.701042	391	560	502	552	432	507
	ENSMUSG00000023034.7	Nr4a1	0.355176	5.55222	10.7523	0.00483007	0.702592	1276	1500	1282	1400	1169	1369
	ENSMUSG00000027314.6	Dll4	0.438735	3.86094	10.7555	0.00482512	0.702592	368	456	390.73	486	308	476
	ENSMUSG00000027408.7	Cpxm1	-0.463718	4.40705	10.7671	0.00480737	0.702592	849	753	798	565	303	497
	ENSMUSG00000042595.7	Fam199x	-0.663701	2.83253	10.7665	0.00480828	0.702592	293	357	201	153	107	152
	ENSMUSG00000026806.15	Ddx31	0.448697	4.04717	10.7319	0.00486161	0.703487	386	519	475	482	411	533
	ENSMUSG00000091639.2	Gm3756	-1.11015	-0.0383747	10.7393	0.00485018	0.703487	35.42	46.56	37.4	17.74	6.7	18.5
	ENSMUSG00000019997.11	Ccn2	0.326396	7.1615	10.6514	0.00498807	0.711325	3917.23	4777.12	3848.19	4843	2957.23	4354.14
	ENSMUSG00000024165.9	Jpt2	0.337519	5.41135	10.6792	0.00494397	0.711325	1078	1353	1281	1464.96	937	1205
	ENSMUSG00000026663.6	Atf6	-0.363846	6.76011	10.6018	0.00506806	0.711325	4336	3911	3694	2868	1871	2455
	ENSMUSG00000028413.13	B4galt1	-0.327564	7.1776	10.6448	0.00499869	0.711325	5268	5330	5230	3718	2417	3632
	ENSMUSG00000030708.14	Dnajb13	-0.728113	2.12278	10.5882	0.00509014	0.711325	122.18	219.6	187.37	104.12	69.16	69.15
	ENSMUSG00000030830.18	Itgal	0.355635	7.58769	10.5849	0.00509547	0.711325	4593	6300	5822	5972	4879	5301
	ENSMUSG00000037808.13	Fam76b	-0.346525	5.54935	10.6136	0.00504887	0.711325	1655	1893	1612	1301	823	1004
	ENSMUSG00000037971.10	1110032A03Rik	-0.57737	2.52694	10.6512	0.0049884	0.711325	209.47	227.2	232.41	137.84	93.18	113.7
	ENSMUSG00000040423.10	Rc3h1	-0.322431	6.08184	10.593	0.00508229	0.711325	2362	2737	2316	1770	1268	1499
	ENSMUSG00000044522.8	A730020M07Rik	-1.78904	-1.63425	10.6771	0.00494733	0.711325	11	15	11	4	2	2
	ENSMUSG00000044674.6	Fzd1	0.362207	5.66727	10.6003	0.00507046	0.711325	1433	1550	1391	1839	1173	1322
	ENSMUSG00000055782.9	Abcd2	-0.861243	0.89311	10.6077	0.00505836	0.711325	78	78	68	38	30	26
	ENSMUSG00000087119.4	Atg4a-ps	-0.848689	1.8466	10.6226	0.00503436	0.711325	89.06	177.58	181.91	82.62	54.6	51.49
	ENSMUSG00000102713.1	Gm29994	-2.3445	-1.60529	10.6219	0.00503539	0.711325	21	7	12	3	0	3
	ENSMUSG00000040710.10	St8sia4	-0.622763	5.72068	13.2224	0.00512994	0.711414	2516	2019	1695	1331	789	1044
	ENSMUSG00000073838.10	Tufm	0.454925	5.39696	10.9023	0.00514371	0.711414	829.14	1405.79	1299.4	1306.61	1026.96	1327.28
	ENSMUSG00000091014.3	Gm5244	-3.17468	-2.0982	10.5557	0.00514344	0.711414	14	5	8	0	2	0
	ENSMUSG00000105572.1	Gm43300	-1.82082	0.0473618	12.4038	0.00514745	0.711414	78	39	24	15	10	6
	ENSMUSG00000008200.15	Fnbp4	-0.460082	8.50408	11.102	0.00517965	0.712311	15694	12939	12441	9994	5887	7448
	ENSMUSG00000033972.9	Zfp944	-0.45869	3.7301	10.5403	0.00516896	0.712311	487.94	574.42	443.37	315.98	215.93	310.31
	ENSMUSG00000045193.13	Cirbp	-0.60688	6.17277	13.2553	0.00519734	0.712975	3375	2658	2455	1755	996	1629
	ENSMUSG00000005237.14	Dnah2	-0.609949	2.38684	10.4928	0.00524854	0.71822	198.32	236.37	178.16	111.21	82	114.12
	ENSMUSG00000000561.14	Wdr77	0.355954	6.07749	10.4845	0.00526261	0.718373	1537.02	2180.53	2150.94	2113.9	1525.05	2089.36
	ENSMUSG00000024317.15	Rnf138	-0.380656	4.48352	10.4608	0.00530294	0.718568	823	864	793	556	391	518
	ENSMUSG00000028560.11	Usp1	-0.343288	6.51791	10.4726	0.0052828	0.718568	3327.87	3362.5	3374.29	2628.6	1570.32	1956.45
	ENSMUSG00000052392.5	Acot4	-2.16152	-2.05761	10.4653	0.00529525	0.718568	8	10.14	8	2	1	1.24
	ENSMUSG00000109390.1	Gm45718	-0.944057	0.450065	10.4317	0.00535311	0.723597	55	52	58	30	19	17
	ENSMUSG00000029392.12	Rilpl1	0.390034	4.99935	10.4166	0.00537919	0.725354	764.96	1043.96	928.96	922.89	738.99	1065.95
	ENSMUSG00000021709.14	Erbin	-0.366899	6.88564	10.3991	0.0054097	0.727287	4718	4352	3976	3011	2221	2540
	ENSMUSG00000048621.3	Gm6377	-0.386128	4.92456	10.3934	0.00541978	0.727287	1115.43	1299	970	727.73	536	718.68
	ENSMUSG00000086429.9	Gt(ROSA)26Sor	-0.768441	3.3807	11.68	0.00543574	0.727667	287.72	651.51	364.8	212.56	149.27	216.15
	ENSMUSG00000060733.13	Ipmk	-0.379483	4.78626	10.3688	0.00546303	0.729558	1024	1027	1006	763	450	613
	ENSMUSG00000024682.3	Cblif	-1.72048	-0.453024	11.0003	0.00551524	0.730958	24	43	30	2	5	15
	ENSMUSG00000028207.18	Asph	-0.437469	4.33128	10.3336	0.00552569	0.730958	682	851	746	593	309	406
	ENSMUSG00000032420.8	Nt5e	-0.494662	3.88974	10.3432	0.00550859	0.730958	599	572	520	324	293	293
	ENSMUSG00000083261.4	Gm7816	0.566586	4.17514	10.8823	0.00552627	0.730958	361.21	601.31	483.11	589.94	538	467.49
	ENSMUSG00000021054.6	Sgpp1	-0.37003	5.96533	10.292	0.00560087	0.738231	2439	2518	1959	1627	1119	1373
	ENSMUSG00000027009.18	Itga4	-0.497493	8.60552	11.3331	0.0056079	0.738231	17532.3	14120	12854.7	10043.8	6617.41	7818.4
	ENSMUSG00000079707.10	Tcte3	-2.75002	-1.77454	10.4476	0.00562367	0.738553	12.51	11.83	11.5	0	3.7	0
	ENSMUSG00000034663.13	Bmp2k	-0.32083	6.98093	10.2543	0.00566991	0.742866	4621.53	4793.83	4373.21	3411.06	2329.78	2751.68
	ENSMUSG00000026384.13	Ptpn4	-0.517298	3.94447	10.2469	0.00568355	0.742896	654	670	447	381	245	331
	ENSMUSG00000032815.16	Fanca	0.330248	5.48347	10.2385	0.00569913	0.74318	1115.63	1424.58	1374.83	1477.92	1024.4	1263.13
	ENSMUSG00000069769.13	Msi2	-0.328307	6.39884	10.2306	0.00571378	0.743342	2754	3493	3032	2412	1481	1797
	ENSMUSG00000064382.1	Gm26447	2.81132	-2.23573	10.2051	0.00576151	0.746048	1.37	0	2.15	11.71	7.11	2.19
	ENSMUSG00000103672.1	Gm37621	-1.29034	-0.759675	10.2105	0.0057514	0.746048	22	32	17	9	6	7
	ENSMUSG00000033184.14	Tmed7	-0.31292	6.20152	10.1718	0.00582458	0.752457	2528	3046.64	2467.56	1938.08	1323.9	1704.73
	ENSMUSG00000062906.12	Hdac10	0.446709	4.56607	10.1522	0.00586199	0.755528	475	767	747	772	573	711
	ENSMUSG00000022724.15	Riox2	0.346712	4.94619	10.1289	0.00590684	0.757993	784.29	960.1	931.84	951.45	730.79	910.94
	ENSMUSG00000029131.14	Dnajb6	-0.301797	6.9567	10.128	0.00590846	0.757993	4298.84	4764.42	4441.29	3288.53	2103.47	3074.66
	ENSMUSG00000024013.15	Fgd2	0.336473	7.10028	10.1132	0.00593722	0.758172	3148	4514	4361	4384	3114	4077
	ENSMUSG00000074676.2	Foxs1	0.606072	2.88007	10.1161	0.00593161	0.758172	187	211	174	202	178	284
	ENSMUSG00000021693.20	Kif2a	-0.345152	5.21215	10.098	0.00596696	0.758502	1171.24	1467.38	1452.11	1014.22	656.02	803.1
	ENSMUSG00000030180.15	Kdm5a	-0.3389	6.43658	10.0979	0.00596718	0.758502	3062.68	3408.35	3051.28	2303.36	1686.61	1758.51
	ENSMUSG00000000031.16	H19	-3.41395	-2.50088	10.0364	0.0060888	0.770427	8	4	6	0	1	0
	ENSMUSG00000072969.2	Armcx5	-0.562779	3.1099	10.0385	0.00608454	0.770427	358.21	333.78	307.29	236.84	133.79	156.1
	ENSMUSG00000026155.13	Smap1	-0.327076	5.58609	10.0175	0.00612667	0.772118	1556.64	1840.97	1869.43	1305.65	867.19	1051.61
	ENSMUSG00000038910.7	Plcl2	-0.343054	6.40133	10.0159	0.00613003	0.772118	2783	3171	3358	2451	1462	1763
	ENSMUSG00000097462.7	9530026P05Rik	-1.53259	-1.25697	10.0059	0.00615024	0.772908	19	15	15	5	2	6
	ENSMUSG00000090698.2	Apold1	-1.13918	4.7457	16.9653	0.0061689	0.773499	1621	1031	911	486	315	468
	ENSMUSG00000004359.16	Spic	0.376214	7.20123	9.95181	0.00626077	0.777787	3873	4162	4571	3996	3538	4908
	ENSMUSG00000017718.15	Afmid	-0.516386	3.7969	9.96212	0.0062395	0.777787	486.54	578.92	539.25	399.14	170.67	313.1
	ENSMUSG00000027900.15	Dram2	-0.355801	5.57841	9.94576	0.00627327	0.777787	1537	2089	1678	1110	827	1226
	ENSMUSG00000029238.11	Clock	-0.386033	4.67254	9.95766	0.0062487	0.777787	951	1019	864	591	484	577
	ENSMUSG00000039680.10	Mrps6	0.412889	4.03769	9.95109	0.00626225	0.777787	431.05	494.69	459.34	486.4	386.33	535.12
	ENSMUSG00000025764.14	Jade1	-0.583681	5.0236	11.6163	0.00633225	0.782059	1548	1195	1051	802	536	628
	ENSMUSG00000033054.7	Npat	-0.418461	4.72355	9.91566	0.00633595	0.782059	827	1116	1040	762	456	498
	ENSMUSG00000056268.15	Dennd1b	-0.487831	5.99417	11.0853	0.00637388	0.782724	2868	2312	2075	1503	1128	1359
	ENSMUSG00000064201.8	Krt2	-1.34494	-0.608714	9.89846	0.00637209	0.782724	18	35	28	12	8	4
	ENSMUSG00000076563.2	Igkv5-48	-0.446919	3.92373	9.89295	0.00638371	0.782724	464	634	626	420	244	311
	ENSMUSG00000002396.8	Ocel1	0.515439	4.01972	9.89837	0.00645701	0.782853	300.85	557.7	469.37	507.22	419.99	499.23
	ENSMUSG00000020128.15	Vps54	-0.368922	7.36548	9.84719	0.00648119	0.782853	6769	5979	5438	4311	2906	3685
	ENSMUSG00000031229.16	Atrx	-0.350913	6.9701	9.86775	0.00643718	0.782853	4290	5324	4264	3247	2499	2510
	ENSMUSG00000058174.7	Gm5148	-0.33609	5.88346	9.88039	0.00641029	0.782853	2077.51	2192.08	2204.19	1480.88	955.92	1534.09
	ENSMUSG00000063108.15	Zfp26	-0.385205	5.33229	9.84685	0.00648194	0.782853	1566	1579	1329	1056	762	808
	ENSMUSG00000074899.6	Sptbn5	-0.634798	2.14005	9.83294	0.00651189	0.782853	182.69	154.94	176.72	99.83	69.67	86.28
	ENSMUSG00000100550.2	2310039L15Rik	4.66839	-3.11654	10.306	0.00645493	0.782853	0	0	0	4	2	2
	ENSMUSG00000108256.1	Gm43923	1.6789	-1.66884	9.84088	0.00649476	0.782853	3	3	6	10	9	11
	ENSMUSG00000111325.1	Gm47140	-1.18354	-0.558357	9.83385	0.00650993	0.782853	30	27	24	8	9	10
	ENSMUSG00000097574.2	C920006O11Rik	-0.952307	1.08461	9.8196	0.00654078	0.784625	120	61	78	44	27	34
	ENSMUSG00000025019.17	Lcor	-0.528624	3.7604	9.77013	0.00664922	0.789423	457	613	504	371	247	214
	ENSMUSG00000026896.14	Ifih1	-0.36246	8.99793	9.77252	0.00664393	0.789423	19415	18468	18542	14424	8335	11458
	ENSMUSG00000032113.16	Chek1	-0.546913	3.05219	9.78448	0.00661756	0.789423	266	354	344	233	120	159
	ENSMUSG00000097322.8	A530083I20Rik	2.86092	-2.27017	9.76887	0.006652	0.789423	0	2.42	1	6.61	11.11	2.34
	ENSMUSG00000111167.1	Gm39321	0.700274	1.76393	9.77473	0.00663905	0.789423	65	89	99	107	97	106
	ENSMUSG00000032942.14	Ucp3	-0.875422	0.397342	9.73633	0.00672447	0.79462	49	61	47	27	15	24
	ENSMUSG00000041935.10	AW549877	-0.360428	6.42068	9.7397	0.00671692	0.79462	3440	3238	2757	2262	1521	1896
	ENSMUSG00000037428.14	Vgf	1.22348	-0.0315924	9.71601	0.00677018	0.798319	17	26	13	22	41	33
	ENSMUSG00000027835.11	Pdcd10	-0.362796	6.15203	9.70657	0.00679153	0.798502	2766.16	2600.73	2471.63	1879.71	1095.2	1784.83
	ENSMUSG00000030127.15	Cops7a	0.321264	5.62922	9.7026	0.00680055	0.798502	1270	1565	1508	1540	1061	1566
	ENSMUSG00000030079.15	Ruvbl1	0.326289	5.20135	9.69464	0.00681865	0.798935	921.21	1177.66	1124.95	1219.31	815.97	1064.93
	ENSMUSG00000041132.11	N4bp2l1	-0.330936	5.43657	9.68265	0.006846	0.800448	1593	1691	1455	1115	755	1034
	ENSMUSG00000021867.16	Tmem254b	0.564109	2.49781	9.6716	0.00687132	0.801717	135.85	158.67	151.46	204.39	145.4	154.36
	ENSMUSG00000009905.5	Kdsr	-0.447699	4.31858	9.66114	0.0068954	0.802836	843	735	666	530	312	442
	ENSMUSG00000030772.6	Dkk3	-0.688796	1.67344	9.64171	0.00694036	0.80469	115	131	131	72	38	72
	ENSMUSG00000035385.5	Ccl2	0.492069	5.74084	10.779	0.00693141	0.80469	1604	1227	1504	1845	1105	1828
	ENSMUSG00000002007.5	Srpk3	0.390512	4.13205	9.62974	0.00696822	0.806234	432	522	540	567	413	517
	ENSMUSG00000004846.10	Plod3	0.305014	6.04044	9.60502	0.0070262	0.811248	1749.69	2232.19	1836.21	2052.73	1511.56	1919.33
	ENSMUSG00000006362.16	Cbfa2t3	0.436901	5.22187	9.84114	0.00706911	0.814506	740.08	1230.78	1180.03	1334.03	880.95	1034.48
	ENSMUSG00000017188.3	Coa3	0.39178	4.45175	9.57273	0.00710273	0.816144	532	689	647	658	480	738
	ENSMUSG00000091228.1	Gm20390	0.328978	5.52317	9.56852	0.00711278	0.816144	1321.42	1425.65	1261.54	1395.78	1023.73	1446.48
	ENSMUSG00000015755.16	Tab2	-0.319063	7.43267	9.55829	0.00713726	0.81726	6101	6755	6029	4932	3104	3641
	ENSMUSG00000004665.10	Cnn2	0.318803	7.35891	9.54372	0.0071723	0.817387	3926	5619	4939	5065	3685	5015
	ENSMUSG00000053040.13	Aph1c	-0.946572	1.04202	9.53945	0.00718261	0.817387	117.86	67.4	66.02	33.53	30.87	36.11
	ENSMUSG00000105361.1	AY036118	0.676909	9.23547	12.3845	0.00716709	0.817387	14935.7	13909	16665	24082.1	17531.1	13971.5
	ENSMUSG00000019947.10	Arid5b	-0.364194	6.53424	9.51314	0.00724649	0.822967	3781	3376	3049	2460	1650	2025
	ENSMUSG00000040809.10	Chil3	-0.765043	5.27642	13.3015	0.00730215	0.827592	1495	1916	1404	1134	468	627
	ENSMUSG00000014551.8	Mrps25	0.381327	4.82171	9.44166	0.0074233	0.834334	762.08	794.72	855.75	930.48	561	951.41
	ENSMUSG00000029863.13	Casp2	-0.302184	6.72431	9.43624	0.00743691	0.834334	3505	4100	3907	3011	1886	2299
	ENSMUSG00000031283.16	Chrdl1	-0.750928	0.992172	9.45275	0.00739557	0.834334	75	87	73	44	25	39
	ENSMUSG00000041995.8	Zbed3	-0.555583	3.62672	9.51082	0.00738892	0.834334	564	435	425	244	206	296
	ENSMUSG00000045826.9	Ptprcap	0.305218	7.06217	9.44709	0.00740969	0.834334	3413.32	4606.78	3814.96	4305.86	2800	4129.67
	ENSMUSG00000013629.16	Cad	0.348696	6.43214	9.4255	0.00746397	0.834444	2018	2809	2696	2774	2180	2291
	ENSMUSG00000026094.14	Stk17b	-0.538856	8.03907	11.2163	0.00752823	0.834444	12224	9696	8469	5974	4612	5530
	ENSMUSG00000037902.18	Sirpa	0.368501	8.21026	9.4062	0.00751285	0.834444	6786	9478	9355	8389	7120	9507
	ENSMUSG00000047714.14	Ppp1r2	-0.326644	6.09446	9.41014	0.00750284	0.834444	2415.78	2808.7	2266.62	1816.98	1097.67	1712.73
	ENSMUSG00000064373.12	Selenop	-0.383117	7.42156	9.55238	0.00748271	0.834444	6399.74	6746.4	5936.9	3875.34	2687.78	4750.15
	ENSMUSG00000096715.2	Igkv3-4	-1.66725	4.74308	19.6221	0.00752352	0.834444	1308.82	1657	1041	234.61	225	502.98
	ENSMUSG00000002458.13	Rgs19	0.342743	5.58027	9.38237	0.00757372	0.836142	1124	1584	1469	1430	1115	1478
	ENSMUSG00000059108.4	Ifitm6	-0.409358	4.00335	9.38613	0.00756408	0.836142	544	655	598	395	245	406
	ENSMUSG00000092329.1	Gm20388	0.443569	4.83034	9.50059	0.00759136	0.836423	636.59	968.26	785.76	949.02	539.36	1025.76
	ENSMUSG00000022122.15	Ednrb	-0.728522	1.94409	9.31944	0.00773717	0.845102	186	155	117	74	54	86
	ENSMUSG00000028249.15	Sdcbp	-0.318926	8.39102	9.31594	0.00774637	0.845102	12054	13387	11262	8828	5621	8302
	ENSMUSG00000031393.16	Mecp2	-0.301199	6.53103	9.32181	0.00773093	0.845102	2995	3726	3359	2497	1758	1994
	ENSMUSG00000062098.11	Btbd3	-0.503718	5.41166	10.4365	0.00773263	0.845102	1850	1707	1325	1195	646	854
	ENSMUSG00000094792.3	Trav10d	-5.00973	-2.79327	9.7339	0.00771167	0.845102	3.25	8.91	1.25	0	0	0
	ENSMUSG00000020841.5	Cpd	-0.327652	5.21484	9.30381	0.00777839	0.846928	1222	1478	1373	1048	649	804
	ENSMUSG00000039929.14	Urb1	0.360662	5.3076	9.29326	0.00780636	0.848306	897	1328	1212	1337	944	1076
	ENSMUSG00000022867.11	Usp25	-0.332787	8.39599	9.25183	0.00791728	0.848944	11515	13126	12376	9614	6178	6817
	ENSMUSG00000025323.10	Sp4	-0.486399	4.75936	9.7792	0.00783145	0.848944	778	1368	994	661	515	509
	ENSMUSG00000026622.15	Nek2	-0.503353	4.40482	9.58904	0.00799273	0.848944	688.31	810.28	942.91	643.91	317.8	381.81
	ENSMUSG00000029571.14	Tmem106b	-0.341018	5.76054	9.25112	0.0079192	0.848944	2036	2177	1740	1413	1013	1177
	ENSMUSG00000032834.11	Pwp2	0.300253	5.7126	9.22281	0.00799604	0.848944	1346	1691	1604	1655	1172	1546
	ENSMUSG00000041423.16	Paqr6	-2.35875	-1.74621	9.23947	0.00795071	0.848944	2	17	17	2	2	1
	ENSMUSG00000044098.14	Rsbn1	-0.368857	5.7102	9.25258	0.00791525	0.848944	2024.93	2155.95	1615.12	1325.58	986.17	1122.06
	ENSMUSG00000056145.5	AI504432	-0.421042	4.98255	9.277	0.00799289	0.848944	1310	1261	970	738	600	682
	ENSMUSG00000062519.13	Zfp398	-0.370973	4.79045	9.22455	0.00799131	0.848944	974	1102	991	728	537	544
	ENSMUSG00000096846.7	Gm8890	-2.44123	-2.07531	9.26051	0.00789389	0.848944	10.03	7.92	8.38	0.5	0	3
	ENSMUSG00000101970.7	1810026B05Rik	-0.376199	5.0179	9.26812	0.00787346	0.848944	1212.54	1248.68	1128	725.92	546.33	854.47
	ENSMUSG00000110018.2	5430437J10Rik	0.946753	0.249679	9.24081	0.0079471	0.848944	18	24	35	40	29	45
	ENSMUSG00000015852.13	Fcrls	-1.4275	-0.781146	9.19971	0.00805939	0.850096	10	33	29	6	5	9
	ENSMUSG00000022119.15	Rbm26	-0.337636	6.4817	9.19094	0.00808359	0.850096	3482.33	3479.36	2829.22	2346.78	1573.5	2062.2
	ENSMUSG00000040987.15	Mill2	0.482396	3.07636	9.19643	0.00806843	0.850096	194	267	232	275	202	261
	ENSMUSG00000046321.8	Hs3st2	0.706993	2.35331	9.20021	0.00805801	0.850096	90	150	143	129	140	199
	ENSMUSG00000091351.1	Gm17135	-3.29609	-2.01144	9.68273	0.00803999	0.850096	1	11	18	0	1	1
	ENSMUSG00000017639.13	Rab11fip4	-0.487643	3.20027	9.17459	0.00812891	0.850951	339	376	332	228	169	173
	ENSMUSG00000022419.16	Deptor	-0.602012	4.18582	10.2325	0.00813778	0.850951	861.86	628.61	636.66	499.91	264	339.73
	ENSMUSG00000057457.11	Phex	-1.19896	-0.882353	9.18013	0.00811352	0.850951	21	21	21	8	5	8
	ENSMUSG00000026463.17	Atp2b4	-0.513438	5.73276	10.5631	0.00817498	0.851435	1636	2261	2289	1571	865	909
	ENSMUSG00000052516.19	Robo2	-0.721496	2.62484	9.3875	0.0081885	0.851435	315	205	215	155	73	126
	ENSMUSG00000114438.1	Gm47827	-1.51095	-1.28745	9.1596	0.00817074	0.851435	13	16.87	18	6.67	4	2
	ENSMUSG00000025762.15	Larp1b	-0.368249	4.48529	9.14011	0.00822547	0.852378	757	825	895	601	362	524
	ENSMUSG00000090307.7	1700071M16Rik	-0.759531	1.17614	9.13909	0.00822833	0.852378	84.9	106.5	78.1	49.31	38.34	33.12
	ENSMUSG00000050921.12	P2ry10	-0.388193	6.62466	9.35668	0.00834059	0.861894	4011.57	3959.24	3001.72	2361.51	1863.58	2185.63
	ENSMUSG00000063611.5	Gm10134	0.434402	3.73576	9.09586	0.00835129	0.861894	317	418	382	411	287	460
	ENSMUSG00000014496.8	Ankrd28	-0.367953	5.65875	9.05949	0.00845635	0.868204	2045	1752	1764	1374	834	1151
	ENSMUSG00000020311.17	Erlec1	-0.354039	4.38094	9.05843	0.00845944	0.868204	725	786	782	534	359	489
	ENSMUSG00000048701.13	Ccdc6	-0.32014	7.16641	9.06471	0.00844119	0.868204	5523	5126	4983	3899	2491	3322
	ENSMUSG00000021770.11	Samd8	-0.391361	4.48809	9.03889	0.00851655	0.871226	888	874	729	540	401	518
	ENSMUSG00000052812.5	Atad2b	-0.357045	5.57104	9.0376	0.00852032	0.871226	1548	2092	1638	1286	911	939
	ENSMUSG00000003604.14	Aven	0.43385	3.86042	8.97963	0.00869239	0.872686	389.95	433.97	389.48	404.1	366.72	472.35
	ENSMUSG00000019877.10	Serinc1	-0.290173	6.81537	9.02373	0.00856113	0.872686	3738	4707	3795	2904	2076	2672
	ENSMUSG00000020057.2	Dram1	0.295214	6.19023	8.98523	0.0086756	0.872686	1991	2430	2051	2256	1571	2268
	ENSMUSG00000021850.14	ccdc198	-2.6901	-2.39778	8.99819	0.00863686	0.872686	5	8	6.4	0	1	1
	ENSMUSG00000023041.7	Krt6b	-3.36329	-2.54605	8.99933	0.00863349	0.872686	8.42	6.69	2	1	0	0
	ENSMUSG00000027365.14	Trpm7	-0.330427	6.02338	8.99878	0.00863513	0.872686	2390	2484	2243	1785	1233	1328
	ENSMUSG00000029480.13	Dhx37	0.354533	5.13686	9.01138	0.00859768	0.872686	819	1121	1114	1084	869	1004
	ENSMUSG00000044768.16	D1Ertd622e	-0.390477	6.24616	9.2319	0.0087078	0.872686	3181.07	2750.97	2484.13	1947.16	1203.68	1857.38
	ENSMUSG00000051627.3	Hist1h1e	-0.783665	1.14908	8.99463	0.00864749	0.872686	75.93	76.86	112.02	45.93	36.46	34.83
	ENSMUSG00000104164.1	Gm38248	-0.926966	0.824652	9.01293	0.00859306	0.872686	95	56	63	30	20	38
	ENSMUSG00000111933.1	Gm36660	-2.21245	-1.84286	8.98213	0.00868488	0.872686	11	5	16	1	3	1
	ENSMUSG00000020918.14	Kat2a	0.290307	6.48658	8.96622	0.00873277	0.873484	2455	2874	2626	2658	2079	2680
	ENSMUSG00000034634.7	Ly6d	0.304254	7.39491	8.9562	0.00876305	0.873484	4850	5370	4613	5391	3458	5316
	ENSMUSG00000098557.1	Kctd12	-0.80069	6.42763	13.6536	0.00875459	0.873484	4542	3124	2951	1771.02	1309	1649
	ENSMUSG00000053205.9	Styx	-0.401251	4.34874	8.92419	0.00886066	0.881628	687.19	899.83	697.57	455.41	402.09	447.04
	ENSMUSG00000009350.13	Mpo	-0.445492	3.8541	8.88898	0.00896948	0.88777	583.4	516.54	524.01	380.07	214.38	338.17
	ENSMUSG00000021464.14	Ror2	0.500683	2.7409	8.89896	0.00893849	0.88777	159	199	185	230	150	211
	ENSMUSG00000044807.13	Zfp354c	-0.729462	1.80371	8.88867	0.00897045	0.88777	166	143	106	88	50	57
	ENSMUSG00000035572.16	Dcaf10	-0.354402	4.4607	8.87651	0.00900837	0.889934	735	880	815	582	408	464
	ENSMUSG00000001542.7	Ell2	-0.317639	5.05697	8.85427	0.00907823	0.891133	1096	1336	1207	804	620	802
	ENSMUSG00000030357.10	Fkbp4	0.440608	6.53995	9.72407	0.00908408	0.891133	1949	3047	2845	2746	2548	2659
	ENSMUSG00000032503.18	Arpp21	1.7142	-1.37811	8.84709	0.0091009	0.891133	5	6.74	3.14	22.83	3	14
	ENSMUSG00000052212.6	Cd177	-0.471298	3.50692	8.85032	0.00909068	0.891133	364	541	396	292	166	266
	ENSMUSG00000079323.9	Gm20661	-0.842534	1.27959	8.85587	0.00907318	0.891133	97.08	100.82	97.15	50.45	47.02	26.28
	ENSMUSG00000053318.7	Slamf8	0.523443	5.57195	10.2729	0.00914798	0.89287	963	1616	1303	1300	1293	1570
	ENSMUSG00000058704.9	Memo1	-0.409821	5.05279	8.89925	0.00915087	0.89287	971	1374	1400	988	526	668
	ENSMUSG00000037278.9	Tmem97	0.428328	3.74183	8.81495	0.00920324	0.893262	314.84	408.17	400.94	400.84	301.42	453.58
	ENSMUSG00000037926.15	Ssh2	-0.533082	7.76063	10.647	0.009174	0.893262	9874	8041	7118	4954	4058	4231
	ENSMUSG00000067336.6	Bmpr2	-0.393896	5.04774	8.81553	0.00920136	0.893262	1335	1321	1023	802	535	831
	ENSMUSG00000024695.16	Zfp91	-0.311574	7.1398	8.79162	0.00927833	0.893367	5294.6	5232.26	4803.73	3943.4	2525.29	3085.03
	ENSMUSG00000027957.13	Slc35a3	-0.343755	4.8185	8.7949	0.00926773	0.893367	892.72	1237.19	988.58	762	494	627
	ENSMUSG00000032596.14	Uba7	-0.373988	9.6094	8.80273	0.00924248	0.893367	23011.5	33864.5	30629	22656.7	13031.1	16318
	ENSMUSG00000105517.1	Gm42436	-2.03917	-1.55124	8.79488	0.00926782	0.893367	23.36	4.62	12.46	3.26	1.29	3
	ENSMUSG00000108514.1	2310001K20Rik	4.49808	-3.18986	9.15358	0.00928491	0.893367	0	0	0	2	2	3
	ENSMUSG00000024014.8	Pim1	-0.373634	7.78316	8.88097	0.0093491	0.894881	8858.45	7617.96	7844.73	5933.81	3351.94	5432.74
	ENSMUSG00000048445.6	Ccdc57	-0.693408	1.20443	8.77763	0.0093237	0.894881	81	94	95	56	32	41
	ENSMUSG00000088088.1	Rmrp	1.51405	0.784495	10.842	0.00934424	0.894881	29.02	27.25	30	102.82	63.57	23.31
	ENSMUSG00000016534.15	Lamp2	-0.292851	7.7954	8.75733	0.00939	0.896867	7620	9141	7380	5994	3914	5257
	ENSMUSG00000021796.15	Bmpr1a	-0.481623	3.86646	8.75361	0.0094022	0.896867	616	539	499	396	258	262
	ENSMUSG00000028245.15	Nsmaf	-0.286483	7.43602	8.733	0.00947015	0.898973	5885	6620	6243	4938	3017	3931
	ENSMUSG00000034254.17	Agpat1	0.391344	5.56838	8.84145	0.00946809	0.898973	990	1643	1448	1415	1106	1531
	ENSMUSG00000042210.17	Abhd14a	0.586046	2.33399	8.72981	0.00948071	0.898973	112	143	140	141.91	126.89	181
	ENSMUSG00000043241.14	Upf2	-0.312126	5.94509	8.72726	0.00948917	0.898973	1926	2524	2294	1678	1173	1293
	ENSMUSG00000007872.3	Id3	0.402923	4.75674	8.69696	0.00959032	0.90392	823	780	677	1012	534	817
	ENSMUSG00000045427.13	Hnrnph2	-0.288607	7.40311	8.70118	0.00957617	0.90392	6074.79	6515.79	5721	4580.6	3086	3875
	ENSMUSG00000100084.2	2310068J16Rik	1.93654	-2.06756	8.70173	0.00957432	0.90392	2.01	2.01	3.04	12.15	3.05	7.07
	ENSMUSG00000043885.14	Slc36a4	-0.506902	3.24575	8.67506	0.0096642	0.90626	400	363	318	227	174	182
	ENSMUSG00000071456.6	1110002L01Rik	0.686431	2.83305	8.98254	0.00963325	0.90626	101.49	210.61	229.72	252.45	176.68	232.35
	ENSMUSG00000094164.2	Ighv2-3	-2.06417	3.74653	17.7892	0.00965994	0.90626	465.57	1093	594	95	80	214
	ENSMUSG00000021741.4	Gm5457	1.8673	-2.10727	8.64466	0.00976781	0.906799	1.69	3.03	2.41	8.16	3.89	8.96
	ENSMUSG00000027309.18	4930402H24Rik	0.388422	4.27878	8.65797	0.0097223	0.906799	442.23	614	605	643	474.82	535.13
	ENSMUSG00000031398.13	Plxna3	0.521778	2.7109	8.64141	0.00977899	0.906799	150	196	182	223	174	178
	ENSMUSG00000071267.11	Zfp942	-0.361875	4.16385	8.63505	0.00980085	0.906799	607.06	747.58	627.63	445.02	313.07	423.69
	ENSMUSG00000082399.1	Gm14036	-4.67383	-2.97168	8.98839	0.00979873	0.906799	4.77	3.63	1.95	0	0	0
	ENSMUSG00000089714.1	Gm16092	1.27389	-0.727699	8.66083	0.00971256	0.906799	7.15	15.57	9.69	18.57	24.99	14.58
	ENSMUSG00000097893.8	1700034P13Rik	-1.07112	-0.49354	8.65617	0.00972843	0.906799	20.43	28.78	34.56	12.61	7.36	10.51
	ENSMUSG00000114487.1	Gm49393	5.11711	-2.91327	9.41976	0.00978311	0.906799	0	0	0	6.85	4.11	0
	ENSMUSG00000009741.15	Ubp1	-0.28569	7.2454	8.62907	0.00982148	0.907194	5313.24	5784.24	5309.81	4277.86	2719.57	3391.56
	ENSMUSG00000031333.7	Abcb7	-0.390757	4.86451	8.60235	0.00991416	0.908186	910	1312	1047	836	520	553
	ENSMUSG00000046876.16	Atxn1	-0.574947	4.32451	9.62558	0.0098669	0.908186	940	676	708	401	371	421
	ENSMUSG00000049649.8	Gpr3	-2.74258	-1.31051	10.0163	0.00987695	0.908186	36	7	10	1	1	4
	ENSMUSG00000049721.14	Gal3st1	1.99403	-1.80471	8.60906	0.00989079	0.908186	3	3	3	3	8	17
	ENSMUSG00000107254.1	Gm43769	-1.26619	-0.891053	8.60586	0.00990193	0.908186	26	16	21	6	6	8
	ENSMUSG00000015314.10	Slamf6	-0.288115	5.5476	8.59277	0.00994765	0.909218	1541	1814	1711	1221	841	1123
	ENSMUSG00000022491.5	Glycam1	-2.72425	-2.37442	8.58975	0.00995824	0.909218	3	9	8	0	1	1
	ENSMUSG00000036499.9	Eea1	-0.308724	5.30226	8.56015	0.0100626	0.917239	1363	1586	1349	1034	744	876
	ENSMUSG00000020440.13	Arf5	-0.308179	6.57982	8.43449	0.0105199	0.91815	2873.85	3911.58	3688.64	2524.15	1559	2436.96
	ENSMUSG00000021068.16	Nin	-0.310497	6.09115	8.45884	0.0104295	0.91815	2177	2797	2482	1859	1322	1401
	ENSMUSG00000022124.15	Fbxl3	-0.314468	6.08672	8.5018	0.0102721	0.91815	2494	2664	2248	1947	1139	1538
	ENSMUSG00000022620.14	Arsa	0.336534	4.83732	8.48055	0.0103496	0.91815	723.11	905.67	863.84	847.09	637.27	920.89
	ENSMUSG00000022814.6	Umps	0.353441	5.01974	8.48151	0.0103461	0.91815	743.3	1041.47	1033.48	1055.35	794.41	882.78
	ENSMUSG00000024548.11	Setbp1	-0.5515	3.52442	8.5692	0.0104869	0.91815	540	389	393	261	213	219
	ENSMUSG00000030282.14	Cmas	-0.37008	5.61443	8.4638	0.0104112	0.91815	1348	2126	2007	1374	804	1082
	ENSMUSG00000030870.12	Ubfd1	0.323322	5.84778	8.46208	0.0104175	0.91815	1372	1951	1745	1720	1411	1661
	ENSMUSG00000032123.5	Dpagt1	0.410059	3.79839	8.49889	0.0102827	0.91815	313	444	423	436	328	429
	ENSMUSG00000036990.13	Otud4	-0.27523	7.29013	8.47625	0.0103654	0.91815	5425	6005	5446	4081	2972	3624
	ENSMUSG00000038539.15	Atf5	0.391103	4.76814	8.49995	0.0102788	0.91815	617	939	781	775	697	831
	ENSMUSG00000038894.7	Irs2	-0.39686	5.74542	8.71296	0.0105161	0.91815	2224	1997.98	1740.95	1542.99	877.99	1114.98
	ENSMUSG00000039286.12	Fndc3b	-0.340923	5.07901	8.48646	0.010328	0.91815	1286	1331	1088	832	611	803
	ENSMUSG00000040260.8	Daam2	-0.531978	3.42338	8.5062	0.0102561	0.91815	427	426	383	324	135	217
	ENSMUSG00000040297.12	Suco	-0.315505	6.0881	8.51836	0.0102122	0.91815	2576.27	2526.72	2295.11	1830.52	1266.92	1479.05
	ENSMUSG00000040963.15	Asgr2	-2.41371	-2.21439	8.43686	0.0105111	0.91815	5	10	8	0	1	2
	ENSMUSG00000044197.8	Gpr146	-0.343283	5.9269	8.5228	0.0101961	0.91815	2376	2385	1914	1682	1010	1396
	ENSMUSG00000046230.11	Vps13a	-0.298571	5.83563	8.43843	0.0105053	0.91815	1999.47	2114.77	2075.9	1550	1078	1236
	ENSMUSG00000046470.5	Sox18	0.850746	2.09067	9.06892	0.0103548	0.91815	59	122	120	110	143	146
	ENSMUSG00000059027.14	9630013D21Rik	-1.01146	-0.253291	8.50189	0.0102718	0.91815	36	36	27	18	9	11
	ENSMUSG00000060002.14	Chpt1	-0.447482	3.56274	8.54816	0.0101053	0.91815	413	518.74	406	335	179	247.38
	ENSMUSG00000060862.10	Zbtb40	0.478016	4.31713	8.72942	0.0102592	0.91815	385	652	617	630	545	551
	ENSMUSG00000071661.7	Zbtb3	0.796013	1.36539	8.43455	0.0105197	0.91815	38	78	69	72	82	84
	ENSMUSG00000072244.11	Trim6	-0.670761	2.20399	8.53176	0.0101639	0.91815	221	180	141	119	63	85
	ENSMUSG00000104217.1	Gm37988	2.28277	-1.69824	8.92712	0.0102007	0.91815	0	4.73	3.69	19.36	9.68	3.57
	ENSMUSG00000107225.1	Gm43637	1.83094	-1.90349	8.44429	0.0104834	0.91815	1	4	4	6	7	12
	ENSMUSG00000108368.1	Gm45053	-1.41273	0.316929	9.55208	0.0103423	0.91815	91.82	31.64	37.47	17.4	12.15	17.97
	ENSMUSG00000026411.17	Tmem9	-0.589754	4.16568	9.43986	0.01056	0.919601	580	807	739	554	266	278
	ENSMUSG00000026571.12	Dcaf6	-0.317921	5.25479	8.42118	0.0105697	0.919601	1160	1598	1431	1039	640	907
	ENSMUSG00000027456.8	Sdcbp2	-0.721573	1.41643	8.40809	0.010619	0.922438	126	102	86	51	39	57
	ENSMUSG00000010755.17	Cars	0.309737	5.67899	8.33435	0.0109014	0.923805	1393	1570	1542	1463	1183	1613
	ENSMUSG00000018459.15	Slc13a3	-1.26758	-0.501046	8.34607	0.010856	0.923805	18	41	28	16	3	9
	ENSMUSG00000019872.13	Smpdl3a	-0.310274	5.4435	8.33665	0.0108925	0.923805	1562	1626	1542	1102	734	1112
	ENSMUSG00000020134.13	Peli1	-0.300597	7.42704	8.34638	0.0108548	0.923805	6361	6502	5800	4853	3043	3831
	ENSMUSG00000021390.6	Ogn	-0.600264	2.60128	8.36039	0.0108007	0.923805	278	242	185	153	84	127
	ENSMUSG00000032410.13	Xrn1	-0.28942	6.71736	8.35063	0.0108383	0.923805	3645.97	4078.91	3671.97	2874.96	2015.96	2252.39
	ENSMUSG00000036446.5	Lum	-0.768276	0.713797	8.35493	0.0108218	0.923805	56	69	68	40	19	29
	ENSMUSG00000040552.8	C3ar1	-0.659194	1.54245	8.37482	0.0107454	0.923805	115	134	92	68	44	54
	ENSMUSG00000042742.7	Bmt2	-0.386142	4.40253	8.33821	0.0108864	0.923805	750	916	691	557	399	420
	ENSMUSG00000051853.10	Arf3	0.273832	7.32534	8.38429	0.0107093	0.923805	4147	5398	4816	5030	3601	4629
	ENSMUSG00000074141.13	Il4i1	0.280084	6.65174	8.36438	0.0107854	0.923805	2909.95	3062.01	2958.76	3285.2	2093.04	3013.82
	ENSMUSG00000085829.1	Gm4285	-0.805828	0.615431	8.35683	0.0108144	0.923805	68	56	56	31	24	24
	ENSMUSG00000093456.7	Gm20662	-1.09022	0.48005	8.54733	0.0109014	0.923805	83.8	44.13	43.95	34.21	13.3	16.68
	ENSMUSG00000110126.1	Gm9347	0.786303	0.783304	8.39296	0.0106763	0.923805	36.92	37.06	46.89	50.6	41.09	68.47
	ENSMUSG00000113210.1	4930474N09Rik	-2.37397	-1.99531	8.37225	0.0107552	0.923805	18	4	6	2	1	1
	ENSMUSG00000117284.1	Gm7072	-0.350655	4.20623	8.38888	0.0106918	0.923805	652.87	719.02	657.07	474.17	323.42	426.34
	ENSMUSG00000019943.10	Atp2b1	-0.309129	6.19121	8.29785	0.0110444	0.927715	2767.86	2695.96	2466	1950.96	1364.95	1609.97
	ENSMUSG00000034973.16	Dop1a	-0.360441	4.91234	8.29269	0.0110648	0.927715	1121.98	1125.98	1069.18	779.6	596.43	596.67
	ENSMUSG00000037446.14	Tulp1	-3.16556	-1.21725	10.4363	0.0110125	0.927715	41	8	10	3	0	2
	ENSMUSG00000048271.14	Rbm33	-0.326125	7.75326	8.29647	0.0110498	0.927715	7531	8639	7490	6199	4053	4240
	ENSMUSG00000057329.7	Bcl2	-0.431741	6.65911	9.15353	0.0110335	0.927715	4425.51	3597.19	3302.69	2312.74	1833.04	2314.63
	ENSMUSG00000079418.3	Atg4a	-0.567502	4.34051	9.30752	0.0109859	0.927715	509.94	1008.42	887.09	535.38	309.4	396.51
	ENSMUSG00000094088.2	Ighv1-64	-0.606335	4.80251	10.0289	0.0110045	0.927715	1205.54	1119.48	965.38	466	491.44	681.86
	ENSMUSG00000023828.3	Slc22a3	0.691899	1.21555	8.28063	0.0111126	0.928207	49	69	54	82	47	86
	ENSMUSG00000031357.3	Syap1	-0.327691	5.05059	8.28596	0.0110914	0.928207	1207	1340	1078	889	602	729
	ENSMUSG00000091160.1	Gm17133	4.50756	-3.18885	8.60571	0.0111209	0.928207	0	0	0	3	3	1
	ENSMUSG00000021381.4	Barx1	-1.56833	-1.1616	8.23346	0.0113018	0.939912	25	11	17	9	2	3
	ENSMUSG00000022540.16	Rogdi	0.292875	5.61676	8.20646	0.0114118	0.939912	1292	1628.92	1434	1466	1126	1473
	ENSMUSG00000025326.12	Ube3a	-0.336946	5.796	8.22739	0.0113264	0.939912	1612.33	2574.19	1972.53	1421.27	1023.07	1256.77
	ENSMUSG00000029298.15	Gbp9	-0.496609	9.81589	9.135	0.0113829	0.939912	41374.8	31754.7	29707.3	23904.3	15142.6	17745.4
	ENSMUSG00000030967.15	Zranb1	-0.327342	5.58543	8.20599	0.0114137	0.939912	1842	1821	1576	1209	815	1205
	ENSMUSG00000039615.9	Stub1	0.32513	5.81824	8.21358	0.0113827	0.939912	1333.4	1948.53	1683.69	1716.75	1204.72	1833.31
	ENSMUSG00000055493.4	Epm2a	-0.826785	0.60199	8.21564	0.0113743	0.939912	42	83	57	29	19	30
	ENSMUSG00000081375.1	Gm14686	5.71333	-2.59576	10.4754	0.0114034	0.939912	0	0	0	8.61	7.81	0
	ENSMUSG00000102329.1	Gm10851	0.359998	4.17008	8.21387	0.0113815	0.939912	511	555	482	617	405	509
	ENSMUSG00000038733.14	Wdr26	-0.314222	7.59578	8.19703	0.0114505	0.94154	5876	8127	7236	5484	3586	3993
	ENSMUSG00000076538.1	Igkv13-84	-0.637658	2.58485	8.19159	0.0114729	0.941986	145.98	315.49	257.58	128.54	104.51	113.23
	ENSMUSG00000074252.2	Gm10654	-1.54858	-0.401693	8.81312	0.0114998	0.942797	56	21	19	11	4	11
	ENSMUSG00000018927.3	Ccl6	-0.418214	3.3374	8.17447	0.0115437	0.943441	346	403	382	248	167	236
	ENSMUSG00000024750.11	Zfand5	-0.302492	6.6375	8.14782	0.0116549	0.943441	3787	3710	3290	2673	1720	2383
	ENSMUSG00000041058.15	Wwp1	-0.406261	3.72645	8.16399	0.0115873	0.943441	491.94	532.95	451	346.95	239	268.93
	ENSMUSG00000045322.10	Tlr9	0.597435	7.81362	10.5733	0.0116073	0.943441	4150	7154	6527	7734	6522	5906
	ENSMUSG00000046442.4	Ppm1e	0.710414	2.08394	8.14768	0.0116555	0.943441	67	138	113	166	124	101
	ENSMUSG00000047462.9	Gpr141b	-1.02591	1.31149	8.87066	0.0116775	0.943441	156	74	79	44	26	50
	ENSMUSG00000072889.9	Nfxl1	-0.407505	3.8714	8.15291	0.0116336	0.943441	570	511	545	376	263	306
	ENSMUSG00000078588.10	Ccdc24	-0.811655	0.912582	8.14235	0.0116779	0.943441	50.98	86.22	89.34	44.47	18.59	37.14
	ENSMUSG00000094787.2	Ighv1-54	1.09343	2.22098	10.0805	0.0115826	0.943441	93	96	103	104	203	145
	ENSMUSG00000100801.1	Gm15459	0.660089	8.53601	10.9359	0.0115868	0.943441	6354.13	11898.4	10461.2	11770.7	10989.1	10947.4
	ENSMUSG00000007739.10	Cct4	0.272073	7.41128	8.13019	0.0117292	0.944494	4652	5406	5150	5123	3970	4906
	ENSMUSG00000018486.2	Wnt9b	-1.14574	-0.270616	8.12944	0.0117323	0.944494	20	53	29	11	13	10
	ENSMUSG00000035105.5	Egln3	-0.960147	1.96784	9.14165	0.0117421	0.944494	218	151	121	107	37	58
	ENSMUSG00000061143.15	Maml3	-0.710613	1.85494	8.12312	0.0117591	0.944494	168	136	124	83	66	51
	ENSMUSG00000026235.14	Epha4	-1.49182	-1.58131	8.11494	0.0117938	0.945911	13	13	11	5	2	3
	ENSMUSG00000017057.9	Il13ra1	-0.396417	5.07061	8.17018	0.0119736	0.94642	1428	1215	1083	878	528	805
	ENSMUSG00000025007.13	Aldh18a1	0.283406	6.12991	8.08375	0.0119273	0.94642	1845	2139	2243	2171	1508	2144
	ENSMUSG00000028910.12	Mecr	0.361266	4.10557	8.07143	0.0119805	0.94642	451	523	508	521	384	554
	ENSMUSG00000030036.8	Mogs	0.289144	6.17797	8.09352	0.0118853	0.94642	1785	2417	2247	2226	1582	2215
	ENSMUSG00000036067.12	Slc2a6	0.306936	5.77386	8.0892	0.0119039	0.94642	1578	1663	1567	1576	1240	1737
	ENSMUSG00000037355.14	Uvssa	-0.368707	4.47856	8.07802	0.011952	0.94642	721	918	836	640	397	436
	ENSMUSG00000038991.17	Txndc5	-0.308627	7.40255	8.06971	0.011988	0.94642	6226	6048.98	6097.98	4108.99	2892.98	4456.99
	ENSMUSG00000051412.6	Vamp7	-0.498131	3.01139	8.08943	0.0119029	0.94642	267	383	276	217	117	173
	ENSMUSG00000059647.5	Cbx3-ps7	4.89072	-3.02784	8.52115	0.0119756	0.94642	0	0	0	4.84	4.36	0
	ENSMUSG00000096793.7	Gm3002	3.98229	-2.39712	8.87549	0.0118716	0.94642	0	1.15	0	16.38	0	3.5
	ENSMUSG00000097162.2	2310010J17Rik	-0.96661	0.138526	8.0826	0.0119323	0.94642	54	37	40	14	17	20
	ENSMUSG00000026073.13	Il1r2	-0.328249	5.43225	8.055	0.0120519	0.949734	1597	1706	1419	1215	687	1026
	ENSMUSG00000027206.13	Cops2	-0.275603	6.01007	8.04825	0.0120814	0.949734	2217	2462	2267	1737	1106	1591
	ENSMUSG00000033392.16	Clasp2	-0.40514	5.67522	8.44578	0.012078	0.949734	2208	1737	1729	1323	824	1199
	ENSMUSG00000033124.16	Atg9a	-0.48644	4.8543	8.79553	0.0121113	0.95074	754.51	1417.49	1186.46	769.26	491.54	562.28
	ENSMUSG00000018425.18	Dhx40	-0.397934	5.8577	8.42517	0.0121706	0.951777	2503	1943	1978	1439	1022	1316
	ENSMUSG00000036391.16	Sec24a	-0.327833	4.64971	8.01892	0.0122104	0.951777	829.01	1050	874	616	475	578
	ENSMUSG00000086384.1	Banf2os	-2.5885	-2.45996	8.02256	0.0121943	0.951777	4	8	6	1	1	0
	ENSMUSG00000104195.1	B230377A18Rik	2.11343	-2.05155	8.02999	0.0121615	0.951777	3.07	0	3.45	10.77	6.59	5.63
	ENSMUSG00000109086.1	Gm5596	-1.83955	0.74548	10.902	0.012199	0.951777	27.49	113.84	104.4	30.68	10.28	11.56
	ENSMUSG00000025220.8	Oga	-0.282889	7.45781	7.99868	0.0123003	0.954758	6034.04	6800.57	6176.94	4552.15	3493.42	3860.18
	ENSMUSG00000040415.15	Dtx3	-0.325776	5.22046	7.99984	0.0122952	0.954758	1241	1388	1450	1097	611	821
	ENSMUSG00000110125.1	Gm33148	-1.62011	-1.03724	8.09471	0.0122841	0.954758	34	15	10	6	2	7
	ENSMUSG00000006494.11	Pdk1	-0.296614	6.33346	7.99136	0.0123331	0.95596	2752	3205	2804	2288	1514	1673
	ENSMUSG00000000276.11	Dgke	-0.563845	4.77592	9.18499	0.012999	0.956504	1332	953	885	654	459	552
	ENSMUSG00000000359.3	Rem1	0.931845	1.50078	8.49127	0.0126487	0.956504	28	91	74	95	85	94
	ENSMUSG00000001768.16	Rin2	-0.314189	5.64509	7.93178	0.0126031	0.956504	1916	1816	1701	1281	864	1236
	ENSMUSG00000002580.7	Mien1	0.352612	4.39928	7.93408	0.0125925	0.956504	538.96	669.99	617.97	624.99	461.9	698.97
	ENSMUSG00000004069.17	Dnaja3	0.362339	5.31389	7.8484	0.0129924	0.956504	827	1345	1285	1293	901	1189
	ENSMUSG00000006179.9	Prss16	-0.876755	0.0699528	7.8361	0.0130509	0.956504	43	48	32	18	15	18
	ENSMUSG00000008604.11	Ubqln4	0.270313	5.85086	7.90484	0.0127274	0.956504	1604	1859	1693	1898	1259	1626
	ENSMUSG00000020707.6	Rnf135	0.344514	4.76516	7.8426	0.01302	0.956504	701	886	777	766	619	901
	ENSMUSG00000022096.14	Hr	-0.794641	0.539245	7.86842	0.0128976	0.956504	51	63	57	26	16	34
	ENSMUSG00000022255.16	Mtdh	-0.274524	6.75934	7.89352	0.01278	0.956504	3909	4079.02	3669.06	2919	1972.05	2535
	ENSMUSG00000024247.14	Pkdcc	0.370189	4.07618	7.91428	0.0126836	0.956504	435	578	439	561	360	522
	ENSMUSG00000029759.9	Pon3	-0.495771	2.62595	7.95158	0.0125126	0.956504	223	238	240	149	92	144
	ENSMUSG00000029821.15	Gsdme	-0.482623	3.01645	7.87386	0.0128721	0.956504	326	315	275	210	138	158
	ENSMUSG00000030077.11	Chl1	-0.848871	0.619548	7.89675	0.012765	0.956504	62	65	56	43	15	22
	ENSMUSG00000030254.16	Rad18	-0.416095	3.84769	7.94253	0.0125538	0.956504	468	585	564	428	218	297
	ENSMUSG00000031112.10	Stk26	-0.441636	3.61787	7.83317	0.013065	0.956504	396	576	421	336	215	233
	ENSMUSG00000031293.13	Rs1	-4.76049	-2.93038	8.18165	0.0128344	0.956504	3	1	7	0	0	0
	ENSMUSG00000031722.10	Hp	-0.290731	5.8026	7.83846	0.0130397	0.956504	1767	2406	1902	1433	1039	1313
	ENSMUSG00000032593.5	Amigo3	-0.360542	4.24712	7.97793	0.0123933	0.956504	714	692	681	508	333	415
	ENSMUSG00000032940.16	Rbm11	-0.963015	0.107747	7.93391	0.0125933	0.956504	29	56	45	26	13	12
	ENSMUSG00000033863.2	Klf9	-0.392186	5.70812	8.2286	0.0126351	0.956504	2187	1937	1675	1337	1002	1053
	ENSMUSG00000034593.16	Myo5a	-0.31457	6.12095	7.94048	0.0125632	0.956504	2713	2558	2287	1877	1254	1566
	ENSMUSG00000036353.13	P2ry12	-0.481527	3.11953	7.9598	0.0124752	0.956504	351	336	297	190	163	184
	ENSMUSG00000037674.15	Rfx7	-0.302663	6.08451	7.85999	0.0129374	0.956504	2489.23	2574.87	2296.58	1677.23	1355.4	1513.95
	ENSMUSG00000038268.4	Ovca2	0.369073	4.58419	7.91249	0.0126919	0.956504	558.3	820.03	694.48	739.77	500.83	810.78
	ENSMUSG00000044337.5	Ackr3	-0.298679	5.80313	7.89565	0.0127701	0.956504	1917	2333	1824	1360	1037	1371
	ENSMUSG00000045205.16	Dpy19l4	-0.377065	3.90332	7.98117	0.0123788	0.956504	529	624	506	394	242	351
	ENSMUSG00000045216.7	Hs6st1	-0.303475	6.55469	7.84499	0.0130086	0.956504	3560.24	3332	3285	2634	1677	2078.51
	ENSMUSG00000047368.4	Abhd17b	-0.458535	5.84256	8.94757	0.0124577	0.956504	2551	2182	1752	1449	898	1334
	ENSMUSG00000051557.15	Pusl1	0.395535	3.5642	7.87916	0.0128472	0.956504	308.83	384.29	311.99	380.45	267.84	364.65
	ENSMUSG00000053398.11	Phgdh	0.316587	6.82342	7.95024	0.0125187	0.956504	3080.05	3592.35	3274.79	3192.93	2416.96	3888.17
	ENSMUSG00000061100.5	Retnla	-0.781923	0.662075	7.9621	0.0124648	0.956504	71	58	56	36	19	29
	ENSMUSG00000069917.7	Hba-a2	-0.481271	12.8554	8.32194	0.012639	0.956504	190903	342082	327846	191792	109674	172755
	ENSMUSG00000076523.2	Igkv15-103	0.514501	4.77772	8.85294	0.0127395	0.956504	802	728	680	703	700	999
	ENSMUSG00000076940.3	Iglv2	-0.430594	5.46783	8.55026	0.012395	0.956504	1772.34	1620.57	1577.84	937.31	693.25	1222.67
	ENSMUSG00000086391.1	1700042O10Rik	-2.88578	-0.885372	10.2231	0.0129601	0.956504	50	12	14	4	0	4
	ENSMUSG00000103290.1	Ighv1-23	2.18954	-2.47601	7.88904	0.0128009	0.956504	1	1.01	2	4	5	6
	ENSMUSG00000105541.1	Gm43136	-1.53721	-1.65573	7.83482	0.013057	0.956504	9	12	14	4	3	2
	ENSMUSG00000106317.1	Gm43848	-1.01695	0.266856	7.84644	0.0130017	0.956504	69	39	37	15	17	23
	ENSMUSG00000108137.1	Gm44053	-1.12832	-0.250924	7.88841	0.0128039	0.956504	46	31	24	12	14	9
	ENSMUSG00000109610.1	Gm7432	0.562425	2.7784	7.91752	0.0126687	0.956504	193.34	192.45	154.7	207.17	141.77	269.81
	ENSMUSG00000115497.1	Gm49207	1.12125	-0.12766	7.88143	0.0128365	0.956504	24.41	19.76	9.72	23.31	33.52	31.37
	ENSMUSG00000062867.13	Impdh2	0.264932	7.11549	7.82549	0.0131017	0.95793	3632.07	4503.55	4306.71	4191.21	3150.03	4062.85
	ENSMUSG00000016529.5	Il10	-0.662088	2.64876	7.99125	0.0131466	0.959357	320	210	206	115	105	138
	ENSMUSG00000021880.7	Rnase6	0.295144	6.01394	7.80543	0.0131983	0.959357	1855	2017	1838	2335	1337	1770
	ENSMUSG00000026725.17	Tnn	-0.295719	5.27171	7.79339	0.0132567	0.959357	1308	1564	1322	1047	719	852
	ENSMUSG00000027366.12	Sppl2a	-0.274938	8.33045	7.7932	0.0132577	0.959357	10776	12975	11042	8844	5729	7558
	ENSMUSG00000036438.14	Calm2	-0.266311	6.73412	7.79277	0.0132597	0.959357	3687.3	4126.7	3633.41	2860.54	1857.2	2627.44
	ENSMUSG00000063410.8	Stk24	-0.323866	6.92201	7.79875	0.0132307	0.959357	4775	4309	4115	3474	2054	2690
	ENSMUSG00000107134.1	Gm42528	-0.50721	2.66999	7.80061	0.0132217	0.959357	243	255	227	130	107	153
	ENSMUSG00000118102.1	Gm50260	2.03295	-2.34879	7.80798	0.013186	0.959357	2	2	1	8	3	6
	ENSMUSG00000006732.14	Mettl1	0.313427	5.05347	7.77613	0.0133409	0.962429	815	1050	1059	1011	782	971
	ENSMUSG00000020108.4	Ddit4	-0.30479	7.5382	7.75576	0.0134411	0.962429	6119	8018	6184	4311	3449	4745
	ENSMUSG00000022324.15	Matn2	-0.532611	2.53263	7.75616	0.0134392	0.962429	243	213	204	149	93	112
	ENSMUSG00000030201.15	Lrp6	-0.30135	5.5295	7.76867	0.0133775	0.962429	1542	1842	1641	1287	875	961
	ENSMUSG00000041328.16	Pcf11	-0.274663	6.90984	7.76026	0.0134189	0.962429	4211.95	4735.95	4017.98	3224.99	2293.98	2689.98
	ENSMUSG00000043091.9	Tuba1c	-0.277467	6.87937	7.77984	0.0133228	0.962429	3701.54	4565.47	4471.84	3229.91	1946.96	2950.76
	ENSMUSG00000044052.3	Ccr10	-1.538	-1.52786	7.76678	0.0133868	0.962429	13	10	16	2	4	4
	ENSMUSG00000059742.10	Kcnh7	-0.560907	2.54485	7.76033	0.0134186	0.962429	257.68	238.03	175.74	137.71	96.54	116.69
	ENSMUSG00000014778.10	Fhod1	0.300405	5.72632	7.74173	0.0135106	0.9625	1382	1790.84	1516	1797.86	1245	1365.58
	ENSMUSG00000021943.7	Gdf10	-0.880532	0.457383	7.70405	0.0136993	0.9625	71	41	50	29	16	24
	ENSMUSG00000022684.15	Bfar	0.280659	6.25445	7.71454	0.0136465	0.9625	1922.55	2542.63	2353	2268.75	1759.31	2269.93
	ENSMUSG00000024052.17	Lpin2	-0.34424	6.64742	7.78487	0.013703	0.9625	2954	4316	3849	2982	1770	1974
	ENSMUSG00000027857.10	Tshb	-1.86963	-1.90528	7.69996	0.01372	0.9625	13	7	9	4	1	1
	ENSMUSG00000033862.7	Cdk10	0.430221	3.99924	7.73832	0.0135276	0.9625	328.08	541.42	481.47	467.47	406.74	494.65
	ENSMUSG00000037270.18	4932438A13Rik	-0.353502	7.40232	7.88608	0.0136097	0.9625	6684.93	6176.81	5732.14	4285.6	3429.35	3387.43
	ENSMUSG00000038872.10	Zfhx3	-0.535779	2.1324	7.70863	0.0136762	0.9625	152	182	168	94	70	101
	ENSMUSG00000041180.13	Hectd2	-0.811106	0.750668	7.72834	0.0135773	0.9625	71.19	66	62	46	21	21.76
	ENSMUSG00000044548.11	Dact1	0.368427	4.54291	7.71026	0.013668	0.9625	636	713	652	844	570	566
	ENSMUSG00000046182.8	Gsg1l	-4.48003	-3.06063	8.00017	0.0136602	0.9625	4	3	2	0	0	0
	ENSMUSG00000048636.7	A730049H05Rik	0.696438	2.08782	7.71515	0.0136817	0.9625	73.48	144.68	102.52	107.34	112.04	169.28
	ENSMUSG00000054770.16	Kctd18	-0.392642	4.47125	7.7272	0.013583	0.9625	913	845.22	700.34	557	414.97	466
	ENSMUSG00000060950.12	Trmt61a	0.36313	4.74137	7.74796	0.0134797	0.9625	599	898	821	778	654	819
	ENSMUSG00000085511.1	Gm11738	-2.1838	0.408434	10.9361	0.0136663	0.9625	108	47	38	17	2	15.24
	ENSMUSG00000104704.1	Gm43133	-2.12481	-2.14324	7.70336	0.0137028	0.9625	5	10	9	2	0	2
	ENSMUSG00000025151.16	Maged1	-0.330507	5.58804	7.68271	0.0138075	0.964124	1868	1886	1502	1327	829	1082
	ENSMUSG00000025403.5	Shmt2	0.292921	7.46551	7.66485	0.0138988	0.964124	4818	5685	5169	4936.99	4017	5677
	ENSMUSG00000026921.19	Egfl7	0.331467	5.50778	7.66961	0.0138744	0.964124	1021	1627	1354	1447	985	1411
	ENSMUSG00000034714.9	Ttyh2	0.457139	3.27136	7.68364	0.0138027	0.964124	219	301	282	316	260	255
	ENSMUSG00000040459.11	Arglu1	-0.304521	7.25249	7.6709	0.0138678	0.964124	5891	5818	4828	4096	2699	3558
	ENSMUSG00000076548.1	Igkv4-69	0.980906	0.634035	7.81361	0.0138719	0.964124	46	25	27	73	24	59
	ENSMUSG00000094433.2	Igkv5-43	-1.26652	5.41441	14.2097	0.0138997	0.964124	1323.24	2719.93	1968.7	528.38	451.9	906.91
	ENSMUSG00000097183.2	Gm17501	0.885096	0.634802	7.66842	0.0138805	0.964124	20	50	36	41	45	60
	ENSMUSG00000108607.2	Gm44646	-3.58675	-2.40694	7.86152	0.0138779	0.964124	15	3	2	0	1	0
	ENSMUSG00000025203.6	Scd2	-0.288013	5.51508	7.64925	0.0139791	0.965714	1623.82	1729.13	1586.34	1213.08	867.06	1022.18
	ENSMUSG00000028907.7	Utp11	0.34984	4.88823	7.6467	0.0139923	0.965714	645	1012	926	958	691	852
	ENSMUSG00000035049.4	Rrp12	0.278789	5.31516	7.65295	0.01396	0.965714	1088	1249	1206	1259	886	1152
	ENSMUSG00000040328.16	Olfr56	-0.313159	7.05436	7.64928	0.013979	0.965714	4127.85	5577.97	4872.02	4043.14	2118.26	2949.56
	ENSMUSG00000003226.7	Ranbp2	-0.285944	8.03126	7.59428	0.0142664	0.966002	9385	9684	9187	7219	4934	5670
	ENSMUSG00000015092.9	Edf1	0.301717	5.93684	7.58691	0.0143055	0.966002	1596.06	1960.23	1859.82	1735.03	1347.8	2016.17
	ENSMUSG00000015656.17	Hspa8	0.648063	11.02	9.52932	0.0142876	0.966002	34942.7	67487.7	59161.9	64471.5	62270.8	60800
	ENSMUSG00000020826.9	Nos2	0.543611	3.37424	7.73011	0.0141733	0.966002	186	366	287	292	270	353
	ENSMUSG00000025078.9	Nhlrc2	-0.326636	5.93951	7.5785	0.0143501	0.966002	2396	2251	2041	1689	1150	1272
	ENSMUSG00000025470.11	Zfp511	0.41547	3.86423	7.55844	0.0144573	0.966002	313.09	499.52	423.63	438.61	373.17	429.06
	ENSMUSG00000027261.2	Hao1	-4.63763	-2.99232	7.91692	0.0140595	0.966002	5	1	4	0	0	0
	ENSMUSG00000027993.16	Trim2	-0.461376	3.1565	7.6087	0.0141904	0.966002	296	357	357	247	154	163
	ENSMUSG00000028277.13	Ube2j1	-0.275336	6.18589	7.56604	0.0144166	0.966002	2628	2773	2434	1880	1312	1791
	ENSMUSG00000029034.9	Ints11	0.336761	4.85157	7.59165	0.0142803	0.966002	650.17	971.71	906.01	918.55	668.16	841.35
	ENSMUSG00000030265.14	Kras	-0.305235	5.64517	7.62509	0.0141046	0.966002	1898.72	1821.72	1699.42	1241.35	907.75	1227.25
	ENSMUSG00000030376.8	Slc8a2	0.851399	0.747672	7.55662	0.0144671	0.966002	27	46	42	83	26	55
	ENSMUSG00000031309.15	Rps6ka3	-0.331116	6.28053	7.63445	0.0140558	0.966002	3126	2834	2516	2002	1483	1693
	ENSMUSG00000031562.15	Dctd	0.474971	3.54099	7.55907	0.014454	0.966002	216	398	353	376	284	356
	ENSMUSG00000035093.16	Secisbp2l	-0.320487	6.07134	7.56746	0.0144091	0.966002	2004	2825	2565	1864	1298	1344
	ENSMUSG00000035704.17	Alg8	0.409074	3.89144	7.55804	0.0144595	0.966002	311	469	481	480	356	436
	ENSMUSG00000039159.16	Ube2h	-0.281316	6.41027	7.6109	0.0141788	0.966002	2541.85	3631.6	3072.62	2295.1	1502.99	2029.44
	ENSMUSG00000040455.17	Usp45	-0.360389	5.05997	7.56564	0.0144188	0.966002	1017	1455	1238	1003	570	653
	ENSMUSG00000042045.6	Sln	1.91289	-2.26036	7.61022	0.0141824	0.966002	2	3	1	6	6	6
	ENSMUSG00000043889.6	Gm8399	0.347389	4.78494	7.63235	0.0140668	0.966002	839.36	775.41	759.93	816.04	631.46	874.66
	ENSMUSG00000050966.9	Lin28a	-1.38609	-1.3423	7.56509	0.0144217	0.966002	10	21	14	7	3	3
	ENSMUSG00000057409.7	Zfp53	-0.334629	4.73891	7.57211	0.0143842	0.966002	869	1140	929	717	511	547
	ENSMUSG00000074994.5	Qser1	-0.322449	4.3643	7.60495	0.0142101	0.966002	689	803	757	549	357	479
	ENSMUSG00000104360.1	Gm8762	2.29248	-2.34443	7.59767	0.0142485	0.966002	1.67	1.5	1.07	11.48	0.97	5.52
	ENSMUSG00000108777.1	Gm45081	-2.94086	-1.62582	8.68869	0.0143599	0.966002	29	4	8	2	0	2
	ENSMUSG00000115379.1	Gm48990	-0.593609	2.07376	7.61067	0.01418	0.966002	173.75	156.25	155.97	82.11	61.47	105.11
	ENSMUSG00000117748.1	Gm50241	0.439669	5.51683	8.30195	0.0143244	0.966002	1030.63	1402.95	1410.99	1243.7	1007.06	1724.85
	ENSMUSG00000037652.15	Phc3	-0.347386	5.99795	7.61129	0.0145303	0.967089	2252	2521	2269	1533	1381	1254
	ENSMUSG00000063888.7	Rpl7l1	0.281668	6.4007	7.54928	0.0145066	0.967089	2088	2796.96	2660.95	2608.97	1795	2624.95
	ENSMUSG00000112017.1	Gm7842	4.69397	-3.10833	7.82116	0.0145357	0.967089	0	0	0	5.1	3	0
	ENSMUSG00000002763.16	Pex6	0.348917	4.94026	7.39994	0.0153376	0.967128	692	1037	947	891	765	912
	ENSMUSG00000003418.11	St8sia6	-0.467158	3.30237	7.47341	0.0149222	0.967128	391	363	359	196	175	244
	ENSMUSG00000015966.17	Il17rb	0.698775	1.56899	7.46288	0.014981	0.967128	67.8	93	59.8	124	83	66
	ENSMUSG00000020064.9	Herc4	-0.259204	6.53508	7.4728	0.0149256	0.967128	3083.5	3600.55	3276	2515	1761	2098
	ENSMUSG00000020211.15	Sf3a2	0.280845	5.67659	7.51095	0.0147149	0.967128	1473.31	1549.45	1516.41	1544.06	1127.33	1564.67
	ENSMUSG00000020695.14	Mrc2	-0.664281	1.45676	7.42819	0.0151763	0.967128	121	105	93	72	39	46
	ENSMUSG00000020794.13	Ube2g1	-0.319937	5.19745	7.52858	0.0146187	0.967128	1385	1426	1186	1005	610	870
	ENSMUSG00000021177.16	Tdp1	0.38735	3.77472	7.46464	0.0149711	0.967128	316	416	437	452	327	387
	ENSMUSG00000024078.7	Ttc27	0.317841	4.52582	7.3906	0.0153914	0.967128	608	717	694	738	550	632
	ENSMUSG00000024290.9	Rock1	-0.287996	6.52603	7.42837	0.0151753	0.967128	2893.99	3832.96	3292.97	2341.99	1867	2002
	ENSMUSG00000024298.15	Zfp871	-0.267025	6.53111	7.41624	0.0152443	0.967128	3062	3773	3136	2454	1781	2089
	ENSMUSG00000024325.8	Ring1	0.322074	4.5557	7.49184	0.01482	0.967128	599	748	714	710	524	736
	ENSMUSG00000024526.9	Cidea	-4.47484	-3.0614	7.66693	0.0153427	0.967128	2	2	5	0	0	0
	ENSMUSG00000024943.9	Smc5	-0.298676	4.95192	7.4748	0.0149145	0.967128	1094	1145	1111	809	583	697
	ENSMUSG00000025161.16	Slc16a3	-0.879545	5.49099	11.5988	0.0150083	0.967128	1320.95	2845.34	1661.35	930.09	730	705.6
	ENSMUSG00000025279.7	Dnase1l3	0.336792	8.86835	7.43092	0.0151609	0.967128	14393	13090	12988	13312	11066	14758
	ENSMUSG00000028906.17	Epb41	-0.718291	8.10254	10.7693	0.0147149	0.967128	6982	14356	12840	6723.99	4063.99	5045
	ENSMUSG00000029710.15	Ephb4	0.314034	4.46938	7.49904	0.0147803	0.967128	584	700	661	701	502	648
	ENSMUSG00000031668.14	Eif2ak3	-0.304313	5.12105	7.42874	0.0151732	0.967128	1293.1	1305.68	1171.69	948.63	607.66	805.81
	ENSMUSG00000034652.12	Cd300a	0.447279	5.28274	8.15112	0.0150976	0.967128	823.81	1288.99	1156.34	1033.04	943	1383.01
	ENSMUSG00000034911.8	Ushbp1	0.445478	3.40128	7.49224	0.0148178	0.967128	319	294	260	365	217	345
	ENSMUSG00000035983.4	Gm7008	0.886355	0.614604	7.52239	0.0146524	0.967128	30.83	35.21	36.88	69.87	48.06	27.38
	ENSMUSG00000037400.17	Atp11b	-0.379398	7.1855	7.92665	0.0150811	0.967128	6240	5123	4706	3834	2582	3163
	ENSMUSG00000041360.8	Pum3	0.274916	5.79804	7.39123	0.0153878	0.967128	1445	1741	1781	1713	1216	1677
	ENSMUSG00000042042.14	Csgalnact2	-0.329958	4.35151	7.42048	0.0152202	0.967128	733	797	700	551	358	459
	ENSMUSG00000048490.14	Nrip1	-0.400659	5.56537	7.87888	0.0149528	0.967128	1891	1719	1660	1107	995	923
	ENSMUSG00000051375.15	Pcdh1	0.656436	2.83572	7.83121	0.0147988	0.967128	118	213	218	210	230	199
	ENSMUSG00000051579.10	Tceal8	-0.461676	2.88852	7.48213	0.0148738	0.967128	260	296	280	186	108	177
	ENSMUSG00000054520.15	Sh3bp2	0.255777	7.71366	7.45718	0.0150129	0.967128	5720	6932	6240	6698	4485	6153
	ENSMUSG00000055436.18	Srsf11	-0.291757	7.47986	7.50878	0.0147268	0.967128	6538	7017	5775	4852	3378	3891
	ENSMUSG00000058806.14	Col13a1	-1.12854	-0.260809	7.40559	0.0153052	0.967128	46	29	25	13	5	18
	ENSMUSG00000061390.6	Uba52-ps	-4.49773	-3.05172	7.76069	0.0148461	0.967128	3.99	3.86	1.29	0	0	0
	ENSMUSG00000063506.14	Arhgap22	0.463841	4.53436	7.92029	0.0148238	0.967128	453.59	764.73	716.15	696.88	492.26	847.44
	ENSMUSG00000063558.4	Aox1	-0.957273	-0.111081	7.52483	0.0146391	0.967128	36	37	36	24	8	12
	ENSMUSG00000063800.5	Prpf38a	-0.301297	5.85958	7.3996	0.0153396	0.967128	1777	2432	2133	1699	939	1346
	ENSMUSG00000066245.5	Gm10156	-0.509668	3.24577	7.3912	0.015388	0.967128	395.31	324.65	359.88	252.54	119.83	227.01
	ENSMUSG00000070298.6	Trcg1	-2.73627	-2.36642	7.46591	0.014964	0.967128	9	5	6	0	2	0
	ENSMUSG00000084350.1	Znf41-ps	-0.38964	3.48228	7.4846	0.01486	0.967128	383.14	460.17	398.6	278.45	184.84	265.99
	ENSMUSG00000086213.2	A330040F15Rik	0.698228	4.07081	9.12724	0.015313	0.967128	307.8	531.82	433.8	422.21	532.79	565.87
	ENSMUSG00000086320.1	Gm12840	-0.466935	3.6143	7.52723	0.014626	0.967128	527	430	422	319	223	228
	ENSMUSG00000097275.1	Gm26648	-0.475676	3.24989	7.39242	0.0153809	0.967128	381.14	363.26	331.69	249.44	177.43	166.82
	ENSMUSG00000100078.1	Gm6170	-0.327729	4.4067	7.45295	0.0150366	0.967128	723.67	813.04	781.33	551.43	346.74	530.07
	ENSMUSG00000100465.1	Gm29264	1.80931	-2.12891	7.45896	0.0150029	0.967128	1	4	2.23	10	4.37	6
	ENSMUSG00000102191.1	Gm36569	4.57294	-3.15013	7.69213	0.0152074	0.967128	0	0	0	5.9	1.39	0.29
	ENSMUSG00000105814.1	Mir703	-3.22488	-2.60564	7.47507	0.014913	0.967128	2	11	3	0	0	1
	ENSMUSG00000108886.1	Gm44830	-2.31341	-2.29213	7.40284	0.015321	0.967128	7	10	4	1	0	2
	ENSMUSG00000109216.1	Gm44907	-1.81204	-1.60445	7.40697	0.0152973	0.967128	13	13	12	4	4	0
	ENSMUSG00000109787.1	Gm45286	-1.05773	-0.499287	7.45942	0.0150003	0.967128	22	24	37	10	11	9
	ENSMUSG00000111340.1	Gm47171	-1.47209	-0.483907	7.88563	0.0151198	0.967128	11.79	43.6	36.41	8.66	11.51	3.97
	ENSMUSG00000039623.13	Ap5z1	0.330679	5.1264	7.38398	0.0154297	0.968434	784	1208	1077	1083	832	1008
	ENSMUSG00000005667.8	Mthfd2	0.321298	5.67926	7.37535	0.0154796	0.969375	1351	1677	1469	1401	1147	1733
	ENSMUSG00000098934.1	Gm18853	-0.349431	4.86623	7.37708	0.0154696	0.969375	1152.61	1014.6	1023.9	776.24	544.46	610.2
	ENSMUSG00000022200.8	Golph3	-0.26509	6.49819	7.34779	0.0156406	0.978349	3119	3501.66	3095.56	2564	1623.76	2050
	ENSMUSG00000106106.2	CT010467.1	0.979662	12.2328	11.2245	0.0156983	0.98085	111055	88730	116786	216452	155724	105953
	ENSMUSG00000017405.14	Nek8	-0.459373	3.83244	7.33119	0.0157796	0.984822	606	530	469	366	192	360
	ENSMUSG00000060743.12	H3f3a	-0.283245	8.5298	7.31953	0.0158076	0.985462	11492.9	15160.3	13497.5	10567.2	6346.95	8526.01
	ENSMUSG00000020775.13	Mrpl38	0.300398	4.90914	7.31252	0.0158494	0.986953	801	965	888	886	671	941
	ENSMUSG00000019979.12	Apaf1	-0.453715	6.79589	8.41339	0.0160539	0.992995	4993	3842	3681	2881	1725	2554
	ENSMUSG00000027087.11	Itgav	-0.37559	5.59759	7.51605	0.0160071	0.992995	2061.31	1771	1507.48	1271.64	794	1141
	ENSMUSG00000027201.16	Myef2	-0.352707	4.54719	7.27935	0.0160486	0.992995	687.31	1012.13	893.41	662.02	409.13	485.27
	ENSMUSG00000033107.6	Rnf125	-0.680671	2.95388	7.83924	0.0160842	0.992995	414.54	258	242	184	124	136.94
	ENSMUSG00000056399.2	Prss34	-0.860327	0.289324	7.28202	0.0160325	0.992995	39	62	44	26	10	26
	ENSMUSG00000074489.9	Bglap3	1.27033	-0.996452	7.28437	0.0160183	0.992995	4	10	12	12	12	24
	ENSMUSG00000090527.2	Gm5538	-1.21252	-1.11952	7.28828	0.0159947	0.992995	19	14	19	6	6	5
	ENSMUSG00000094689.1	Ighv1-81	-0.634175	3.0143	7.65294	0.0160897	0.992995	379	322	249	215	140	118
	ENSMUSG00000028527.18	Ak4	-0.491633	2.90772	7.26	0.0161662	0.993258	260.85	342.7	254.05	215.09	115.35	141.7
	ENSMUSG00000028788.14	Ptp4a2	-0.328266	8.05963	7.26195	0.0161543	0.993258	10830.9	9293.01	8923	6631	4632	6661
	ENSMUSG00000030798.15	Cd37	0.254508	8.06255	7.26771	0.0161192	0.993258	7445	8642	7959	8502	5770	7778
	ENSMUSG00000054892.14	Txk	-0.509886	4.17948	7.81576	0.0161649	0.993258	855	647	563	479	277	381
	ENSMUSG00000059811.13	Atl2	-0.275674	5.62833	7.25714	0.0161836	0.993258	1759	1873	1691	1360	889	1143
	ENSMUSG00000047412.16	Zbtb44	-0.277553	5.39013	7.24476	0.0162595	0.996104	1451	1624	1445	1116	791	951
	ENSMUSG00000067235.14	H2-Q10	-0.316106	5.06524	7.24078	0.0162839	0.996104	1149.75	1339.45	1164.37	841.53	684.27	699.47
	ENSMUSG00000091985.1	Gm17354	-0.634379	1.98305	7.24219	0.0162752	0.996104	187.09	140.58	130.82	103.86	51.86	76.95
	ENSMUSG00000000157.16	Itgb2l	-0.638633	1.52052	7.23569	0.0163153	0.996922	105	126	103	80	34	54
	ENSMUSG00000031861.16	Lpar2	0.33576	4.0241	7.22953	0.0163533	0.997049	433	514	468	532	377	458
	ENSMUSG00000037062.13	Sh3glb1	-0.262283	7.77522	7.23206	0.0163377	0.997049	7622	8334	7565	5692	3866	5555
	ENSMUSG00000056043.5	Rgs9bp	1.06016	-0.845367	7.22319	0.0163925	0.998342	10	14	8	24	12	16
	ENSMUSG00000000001.4	Gnai3	-0.16273	6.99439	2.41088	0.140449	1	4630	4485	4097	3456	2343	3326
	ENSMUSG00000000003.15	Pbsn	0	-3.86144	0	1	1	0	0	0	0	0	0
	ENSMUSG00000000028.15	Cdc45	-0.334019	3.45409	0.694964	0.439866	1	212	509	494	403	160	186
	ENSMUSG00000000037.17	Scml2	-0.260822	-1.22697	0.17417	0.683562	1	10	8	20	18	5	2
	ENSMUSG00000000049.11	Apoh	-0.200456	-2.98717	0.0424352	0.839444	1	3	2	1	2	1	1
	ENSMUSG00000000056.7	Narf	-0.331263	5.04819	0.321276	0.599568	1	442	1818	1462	1115	614	502
	ENSMUSG00000000058.6	Cav2	0.158874	1.4131	0.455275	0.509671	1	65	100	79	77	66	62
	ENSMUSG00000000078.7	Klf6	-0.0889281	7.68253	0.650526	0.431992	1	7435	6800	6511	6073	3924	5127
	ENSMUSG00000000085.16	Scmh1	-0.0878572	3.77582	0.406402	0.533003	1	459	447	473	405	263	335
	ENSMUSG00000000088.7	Cox5a	0.148029	6.28849	1.99699	0.177162	1	2433.47	2411.56	2434.65	2288.64	1573.77	2369.46
	ENSMUSG00000000093.6	Tbx2	-0.747751	1.69219	5.17683	0.0436309	1	185	85	110	70	37	73
	ENSMUSG00000000094.12	Tbx4	-2.62377	-2.92796	4.4801	0.050658	1	6	2	2	1	0	0
	ENSMUSG00000000103.12	Zfy2	0	-3.86144	0	1	1	0	0	0	0	0	0
	ENSMUSG00000000120.6	Ngfr	0.121762	2.22538	0.330529	0.573508	1	161	126	145	119	102	140
	ENSMUSG00000000125.5	Wnt3	-0.133737	-2.59044	0.0278764	0.869535	1	2	3	5	2	1	4
	ENSMUSG00000000126.11	Wnt9a	1.02329	-1.70277	3.43532	0.0827339	1	5	6	5	5	7	13
	ENSMUSG00000000127.15	Fer	0.137271	2.60467	0.438858	0.517297	1	127	247	198	177	115	188
	ENSMUSG00000000131.15	Xpo6	0.0653422	7.24728	0.465206	0.505155	1	4796	5036	4770	4598	3215	3927
	ENSMUSG00000000134.17	Tfe3	0.0302265	5.53441	0.0820166	0.778333	1	1252	1731	1554.49	1333	930	1279
	ENSMUSG00000000142.15	Axin2	0.278589	1.44905	1.21096	0.287755	1	53	91	96	90	68	62
	ENSMUSG00000000148.17	Brat1	0.209489	4.71635	3.01104	0.102312	1	636	938	840	809	574	744
	ENSMUSG00000000149.10	Gna12	0.0861022	5.31585	0.680636	0.421746	1	1178.83	1311.52	1311.44	1264.42	826.56	1016.36
	ENSMUSG00000000154.16	Slc22a18	0.221873	-1.15408	0.262088	0.615826	1	12	15	8	10	10	11
	ENSMUSG00000000159.16	Igsf5	-0.340937	-2.51849	0.157206	0.697087	1	2.53	4	5	2.02	0	5
	ENSMUSG00000000167.14	Pih1d2	-0.243785	-1.26465	0.293592	0.595547	1	10	16	11	12	6	6
	ENSMUSG00000000168.9	Dlat	0.171448	4.38389	1.92168	0.185075	1	542	720	676	682	453	536
	ENSMUSG00000000171.5	Sdhd	-0.111611	6.26851	1.01009	0.330144	1	2626	2698	2542	2334	1277	2078
	ENSMUSG00000000182.9	Fgf23	-0.0398261	1.69857	0.0164465	0.900074	1	152	73	86	101	51	89
	ENSMUSG00000000183.6	Fgf6	-0.343585	-1.02766	0.734878	0.404223	1	15	16	15	11	6	11
	ENSMUSG00000000184.12	Ccnd2	-0.0290381	9.17738	0.0671914	0.798844	1	19929	18933.8	18506.1	17346.7	11414	14737.9
	ENSMUSG00000000194.13	Gpr107	0.0504133	5.90371	0.20141	0.659727	1	1515	2354	1970	1766	1252.67	1580
	ENSMUSG00000000197.8	Nalcn	1.23899	-3.05156	1.26279	0.27804	1	2	1	0	4	1	1
	ENSMUSG00000000202.9	Btbd17	-1.74732	-3.74682	0.812777	0.382904	1	0	0	1	0	0	0
	ENSMUSG00000000204.16	Slfn4	-0.159083	9.17913	1.98221	0.178681	1	18805.7	23051.9	18550.7	17331.5	11230.9	12981
	ENSMUSG00000000214.11	Th	0	-3.86144	0	1	1	0	0	0	0	0	0
	ENSMUSG00000000215.11	Ins2	2.85775	3.12306	1.79638	0.247925	1	121	14	66	0	54	1138
	ENSMUSG00000000216.8	Scnn1g	0.111234	-2.80217	0.0130525	0.910492	1	4	1	2	2	0	4
	ENSMUSG00000000223.13	Drp2	-0.076205	-0.364704	0.0326546	0.858914	1	24	25	22	34	6	14
	ENSMUSG00000000244.17	Tspan32	0.23136	4.83716	2.48967	0.136306	1	602.38	987.5	1019.65	881	660	778.78
	ENSMUSG00000000247.11	Lhx2	0.0152478	2.71394	0.00191114	0.966288	1	294	166	165	245	87	179
	ENSMUSG00000000248.16	Clec2g	-0.605156	-0.801317	2.46826	0.13613	1	21	21	17	14	7	9
	ENSMUSG00000000253.13	Gmpr	-0.102552	0.261558	0.103	0.752498	1	51	33	30	30	24	28
	ENSMUSG00000000263.15	Glra1	-1.75401	-3.74607	0.808868	0.384019	1	1	0	0	0	0	0
	ENSMUSG00000000266.11	Mid2	-0.167289	1.64511	0.61813	0.443467	1	100	120	99	79	64	73
	ENSMUSG00000000275.16	Trim25	-0.124597	9.11651	1.24407	0.281496	1	19773	19206	17850	15952	10798	13476
	ENSMUSG00000000278.10	Scpep1	0.0980682	5.96114	1.03205	0.325102	1	1895	2085	1942	1815	1299	1752
	ENSMUSG00000000282.12	Mnt	0.000218704	5.64598	4.86485e-06	0.998268	1	1464	1862	1618	1473	982	1341
	ENSMUSG00000000290.13	Itgb2	0.0981103	7.34715	0.827301	0.376828	1	4264	5843	5468	4379	3642	4593
	ENSMUSG00000000295.13	Hddc2	-0.17557	3.16457	1.04941	0.321193	1	338	315	272	216.03	175	237
	ENSMUSG00000000296.8	Tpd52l1	-0.178695	-1.40224	0.0974907	0.758977	1	14	9	9	4	3	15
	ENSMUSG00000000301.16	Pemt	0.265314	0.089611	0.699472	0.415529	1	30	25	34	34	16	34
	ENSMUSG00000000303.12	Cdh1	0.4299	3.97544	0.580841	0.48547	1	285	561	488	237	316	797
	ENSMUSG00000000305.12	Cdh4	-0.450672	2.56502	0.864626	0.391801	1	363	146	137	163	84	132
	ENSMUSG00000000308.14	Ckmt1	0.555525	-1.03332	1.29238	0.27269	1	14	10	10	6	12	20
	ENSMUSG00000000317.11	Bcl6b	0.236216	4.54391	2.73065	0.118325	1	613	782	718	730	404	802
	ENSMUSG00000000318.16	Clec10a	0.336949	2.52656	1.71347	0.214263	1	115.37	175.62	208.72	253.79	89.89	154.64
	ENSMUSG00000000320.10	Alox12	0.13737	4.78462	0.29417	0.605786	1	1106	756	684	939	471	813
	ENSMUSG00000000325.16	Arvcf	-0.184385	2.32567	0.389881	0.545626	1	85	230.37	211.34	152.07	96.15	102.29
	ENSMUSG00000000326.13	Comt	0.119721	5.01664	0.636279	0.439458	1	704.62	1236.3	1144.25	1085.21	636	849.26
	ENSMUSG00000000339.14	Rtca	0.0232827	4.52026	0.0371548	0.849626	1	737	788	709	715	422	626
	ENSMUSG00000000340.10	Dbt	0.0524966	4.16983	0.176949	0.679719	1	547	626	563	490	384	500
	ENSMUSG00000000346.9	Dazap2	-0.215362	8.33228	3.93423	0.0651128	1	11894.6	11325.4	10749.2	8820.35	5730.5	8129.71
	ENSMUSG00000000355.13	Mcts1	0.0416335	4.06757	0.110994	0.743429	1	518	549	553	499	332	455
	ENSMUSG00000000365.9	Rnf17	-0.378326	-1.04838	0.569329	0.461712	1	7	16	23	7	5	15
	ENSMUSG00000000374.8	Trappc10	-0.118178	6.24934	1.03635	0.324129	1	2203	2823	2798	2477	1417	1675
	ENSMUSG00000000378.15	Ccm2	0.14327	5.94091	1.91148	0.18618	1	1714	2164	1888	1813	1204	1883
	ENSMUSG00000000381.10	Wap	0	-3.86144	0	1	1	0	0	0	0	0	0
	ENSMUSG00000000384.15	Tbrg4	0.112207	5.93242	1.14599	0.300597	1	1966.4	1881	1907.47	1869	1311	1610.71
	ENSMUSG00000000385.8	Tmprss2	0.177594	2.04316	0.533617	0.475867	1	119	152	106	83	102	134
	ENSMUSG00000000386.16	Mx1	-0.212943	10.2069	0.809524	0.398909	1	54217.6	33111.8	35623.1	32854.4	21600.2	28677.9
	ENSMUSG00000000392.17	Fap	-0.293109	3.29605	1.46172	0.253516	1	473	270	296	248	185	227
	ENSMUSG00000000394.15	Gcg	2.63804	1.12665	2.00844	0.225971	1	23	7	28	1	12	277
	ENSMUSG00000000399.10	Ndufa9	0.161341	5.333	2.5477	0.130416	1	1154	1320	1273	1281	849	1094
	ENSMUSG00000000402.2	Egfl6	0.046919	-1.2589	0.0117554	0.915037	1	9	14	11	10	6	11
	ENSMUSG00000000409.14	Lck	0.0435135	6.46667	0.210982	0.652304	1	2703	3043	2833	2556	1899	2304
	ENSMUSG00000000411.7	Tssk3	-0.35319	-1.094	0.705061	0.413712	1	12	18	14	10	9	7
	ENSMUSG00000000416.16	Cttnbp2	-0.319579	3.1511	2.81028	0.113489	1	390.47	297	265.77	233	148.84	214
	ENSMUSG00000000420.15	Galnt1	-0.152707	6.52384	2.55209	0.130108	1	2871.1	3510.69	3180.36	2714	1675.15	2246
	ENSMUSG00000000435.1	Myf5	0	-3.86144	0	1	1	0	0	0	0	0	0
	ENSMUSG00000000439.9	Mkrn2	0.0316783	5.38122	0.0893102	0.768981	1	1301.87	1429.69	1321.8	1213.6	916.15	1033.79
	ENSMUSG00000000440.12	Pparg	-0.271248	1.34093	1.27157	0.276437	1	77	89	99	53	43	72
	ENSMUSG00000000441.17	Raf1	-0.0519624	6.96186	0.23028	0.637943	1	4445.03	4096.42	3891.3	3732.52	2414.69	3148.42
	ENSMUSG00000000486.13	2001-09-01	0.0244504	6.53052	0.0672336	0.798782	1	2877	3288	2866	2765	1841	2464
	ENSMUSG00000000530.16	Acvrl1	0.243275	4.99791	4.08866	0.0605822	1	763	1097	1037	985	651	994
	ENSMUSG00000000531.5	Grasp	0.0864654	2.3623	0.221831	0.644136	1	161	159	164	152	109	134
	ENSMUSG00000000532.11	Acvr1b	-0.0266511	5.2683	0.0614539	0.807431	1	1237	1426	1166	1115	733	1049
	ENSMUSG00000000538.18	Tom1l2	0.386372	5.03878	4.67932	0.0567946	1	602	1164.69	1073.4	1160.16	749.42	914
	ENSMUSG00000000544.14	Gpa33	0	-3.86144	0	1	1	0	0	0	0	0	0
	ENSMUSG00000000552.10	Zfp385a	0.208024	4.14717	2.66894	0.122245	1	465	633	525	524	381	526
	ENSMUSG00000000555.8	Itga5	0.0543628	5.70115	0.182247	0.675318	1	1839	1623	1530	1706	938	1419
	ENSMUSG00000000560.9	Gabra2	0.330761	-3.44364	0.0531613	0.820633	1	1	0	1	0	1	1
	ENSMUSG00000000562.5	Adora3	-0.318354	0.404206	0.931073	0.349236	1	57.42	52.08	26.2	36.78	20	28
	ENSMUSG00000000563.17	Atp5f1	-0.0281438	7.04548	0.0926607	0.764826	1	4055.81	4623.5	4465.66	3824.22	2532.12	3576.37
	ENSMUSG00000000567.5	Sox9	-0.197775	0.767008	0.331876	0.573548	1	73	40	56	35	22	59
	ENSMUSG00000000568.15	Hnrnpd	-0.0881963	7.36609	0.712326	0.411368	1	5741.7	5483.54	5451.45	4967.94	3043.51	4178.26
	ENSMUSG00000000579.14	Dynlt1c	0.0862276	3.34007	0.30613	0.58787	1	255.9	385.2	327.8	286.79	218.49	275.29
	ENSMUSG00000000594.7	Gm2a	0.0363549	6.51964	0.136905	0.716329	1	2700	3130	3100	2539	1837	2648
	ENSMUSG00000000600.15	Krit1	-0.138097	5.84069	1.60607	0.22355	1	1788	2225	1913	1640	1205	1254
	ENSMUSG00000000605.9	Clcn4	0.206611	5.9751	3.60384	0.0762152	1	1564.49	2265.4	1958.6	1977.67	1449.73	1644.74
	ENSMUSG00000000606.18	Vmn2r88	0	-3.86144	0	1	1	0	0	0	0	0	0
	ENSMUSG00000000617.14	Grm6	0.300528	-0.332003	0.70605	0.413392	1	27	17	20	20.32	15	25.94
	ENSMUSG00000000627.15	Sema4f	-0.823458	4.01912	3.21141	0.138349	1	998	471	514	419	160	330
	ENSMUSG00000000628.10	Hk2	-0.00675584	5.81467	0.00133062	0.971777	1	2273	1562	1645	1642	1081	1539
	ENSMUSG00000000631.20	Myo18a	0.206548	5.64427	2.27057	0.154549	1	1101	1773	1738	1745	1032	1308
	ENSMUSG00000000632.13	Sez6	-1.75401	-3.74607	0.808868	0.384019	1	1	0	0	0	0	0
	ENSMUSG00000000673.9	Haao	-0.0195522	5.23835	0.0348168	0.854374	1	1116	1396	1237	1113	787	926
	ENSMUSG00000000682.7	Cd52	0.104513	7.96324	0.859354	0.367974	1	8222	7998	7385	7385	4744	7577
	ENSMUSG00000000686.11	Abhd15	0.0713597	0.938211	0.0679101	0.797797	1	46.52	60.18	71.7	62.34	44.54	35.83
	ENSMUSG00000000690.5	Hoxb6	-0.143493	-0.756379	0.144848	0.708616	1	18	18	18	12	13	12
	ENSMUSG00000000693.10	Loxl3	-0.182042	3.48189	1.36407	0.260291	1	393.34	403.79	362.74	313.61	177.56	305.97
	ENSMUSG00000000701.8	Tcl1b5	0	-3.86144	0	1	1	0	0	0	0	0	0
	ENSMUSG00000000706.16	Btn1a1	-0.832972	-0.903477	2.96681	0.104657	1	9	25	24	15	5	5
	ENSMUSG00000000708.14	Kat2b	-0.28257	5.89455	3.50604	0.0879099	1	1506.87	2541.94	2441.8	1742.92	1082.95	1249.92
	ENSMUSG00000000711.3	Rab5b	0.050256	6.14475	0.107191	0.749859	1	1542.97	2846.19	2539.45	2151.15	1480.68	1809.87
	ENSMUSG00000000724.10	Cryba1	-1.75401	-3.74607	0.808868	0.384019	1	1	0	0	0	0	0
	ENSMUSG00000000730.13	Dnmt3l	0.171047	-0.590579	0.190153	0.668735	1	9	24	23	18	12	18
	ENSMUSG00000000731.15	Aire	-0.0511156	2.05804	0.0593131	0.810744	1	121	124	165	108	80	116
	ENSMUSG00000000732.9	Icosl	0.185218	7.33256	3.49669	0.0802864	1	4423	5454	5021	4794	3792	4272
	ENSMUSG00000000738.18	Spg7	0.135776	5.36722	1.75889	0.203763	1	1140	1404	1336	1218	905	1130
	ENSMUSG00000000739.14	Sult5a1	-0.143031	-2.59136	0.0239753	0.878924	1	3	4	3	1	0	6
	ENSMUSG00000000740.12	Rpl13	-0.0592074	9.68033	0.2517	0.622854	1	27540.9	28630.1	26166.6	21730	15246.5	24000.8
	ENSMUSG00000000743.9	Chmp1a	-0.0651631	6.6547	0.469896	0.503048	1	3048.79	3577.79	3532.74	2848.78	1895.89	2731.84
	ENSMUSG00000000751.13	Rpa1	-0.0144584	5.94809	0.00700575	0.935156	1	1421	2285	2455	2042	1242	1385
	ENSMUSG00000000753.15	Serpinf1	0.0745559	2.3268	0.141263	0.712067	1	159	144	170	153	87	149
	ENSMUSG00000000759.14	Tubgcp3	-0.0924584	5.7405	0.744866	0.401119	1	1636	1920	1881	1628	1084	1200
	ENSMUSG00000000766.18	Oprm1	-1.01729	-3.44659	0.368112	0.552722	1	3	0	0	1	0	0
	ENSMUSG00000000776.13	Polr3d	-0.00347484	4.54127	0.000814955	0.977586	1	760	801	726	651	438	673
	ENSMUSG00000000782.16	Tcf7	-0.00359414	6.38857	0.00118773	0.972943	1	2607	3082	2582	2250	1870	2136
	ENSMUSG00000000791.9	Il12rb1	0.146074	5.689	2.06057	0.170808	1	1459	1679	1687	1699	1060	1361
	ENSMUSG00000000792.2	Slc5a5	1.28753	-1.87521	3.82835	0.0684496	1	6	4	2	4	5	14
	ENSMUSG00000000794.9	Kcnn3	-0.140649	0.0353181	0.118568	0.735662	1	45	36	17	30	24	14
	ENSMUSG00000000804.14	Usp32	-0.486504	6.12434	3.11848	0.135088	1	1700	3515	2918	2001	1242	1159
	ENSMUSG00000000805.18	Car4	0.347979	-2.86192	0.153235	0.700733	1	2	3	1	3	1	2
	ENSMUSG00000000811.13	Txnrd3	-0.217844	3.56309	1.44209	0.247866	1	459	410	368	337	165	337
	ENSMUSG00000000817.10	Fasl	0.0760656	2.5837	0.149274	0.704424	1	205	202	160	156	115	190
	ENSMUSG00000000823.16	Zfp512b	-0.27868	5.5268	5.49408	0.032614	1	1615	1704	1646	1431	775	983
	ENSMUSG00000000826.16	Dnajc5	-0.113339	7.48297	1.40568	0.253437	1	5641	6663	6036	5214	3561	4223
	ENSMUSG00000000827.18	Tpd52l2	0.151937	5.24447	1.56792	0.228871	1	907	1412	1244	1183	749	1103
	ENSMUSG00000000861.15	Bcl11a	0.24594	6.00322	6.74553	0.0196857	1	1729.84	2084.8	1975.16	2065.58	1374.92	1836.53
	ENSMUSG00000000869.12	Il4	0.327261	-1.77217	0.316386	0.581743	1	2	9	9	7	6	6
	ENSMUSG00000000876.11	Pxmp4	-0.196063	2.99551	1.16006	0.297751	1	204	341	294	242	133	189
	ENSMUSG00000000881.12	Dlg3	-0.146785	3.33076	1.01424	0.329183	1	317	365	353	273	189	256
	ENSMUSG00000000884.17	Gnb1l	0.145291	1.83678	0.490828	0.493827	1	101	126	102.16	100.45	69.8	109.32
	ENSMUSG00000000889.8	Dbh	0	-3.86144	0	1	1	0	0	0	0	0	0
	ENSMUSG00000000901.17	Mmp11	0.518982	0.211203	2.43458	0.138645	1	24.09	42.04	24.1	25.16	33	38.08
	ENSMUSG00000000902.13	Smarcb1	0.27299	5.87239	6.4872	0.0217802	1	1399	2015	1843	1885	1322	1635
	ENSMUSG00000000915.15	Hip1r	-0.076126	7.49974	0.44446	0.514671	1	6494.89	6257.63	5468.66	5639.75	3269.12	4564.67
	ENSMUSG00000000916.15	Nsun5	0.308546	4.74831	7.2065	0.0164964	1	707.56	863.35	795.94	782.82	621.14	828.86
	ENSMUSG00000000934.9	Top1mt	0.261425	2.95147	2.2083	0.157105	1	191	235	264	214	188	224
	ENSMUSG00000000938.11	Hoxa10	-1.00513	-3.44805	0.423554	0.524595	1	1	0	2	1	0	0
	ENSMUSG00000000942.10	Hoxa4	-0.669973	-1.19873	2.1186	0.165254	1	9.92	22	12	10	5	6
	ENSMUSG00000000948.16	Gm38393	-1.75401	-3.74607	0.808868	0.384019	1	1	0	0	0	0	0
	ENSMUSG00000000957.11	Mmp14	0.00184988	6.95545	0.000304248	0.986304	1	4297	4086	3778	3541	2445	3422
	ENSMUSG00000000958.10	Slc7a7	0.218753	4.55837	2.49512	0.134164	1	622.34	760.37	762.89	591.72	543.47	755.52
	ENSMUSG00000000959.7	Oxa1l	0.0262399	5.62853	0.064018	0.803543	1	1580.66	1714.63	1525.11	1528.28	934.53	1340.48
	ENSMUSG00000000976.13	Heatr6	0.184284	5.12026	2.88533	0.109147	1	925	1205	1086	1144	752	905
	ENSMUSG00000000982.5	Ccl3	0.0249198	3.9406	0.00497316	0.946301	1	663	340	462	398	254	527
	ENSMUSG00000000983.13	Wfdc18	1.07837	-2.26694	2.27062	0.151734	1	3	2	4	3	3	9
	ENSMUSG00000001014.6	Icam4	-0.957339	1.32372	1.19499	0.329496	1	26.37	117.8	174.19	81.2	29.87	15.5
	ENSMUSG00000001016.12	Ilf2	0.0438352	5.84928	0.207144	0.655255	1	1698.98	2074.22	1828.1	1742.51	1177.5	1510.44
	ENSMUSG00000001017.15	Chtop	0.00822281	7.35507	0.00767233	0.93131	1	4822.99	5914.97	5381.98	4595.76	3290.98	4526.84
	ENSMUSG00000001018.15	Snapin	-0.0981614	4.80065	0.80907	0.382006	1	886.02	1034.78	914.9	799.74	517.5	724.56
	ENSMUSG00000001020.8	S100a4	-0.0831745	5.00264	0.234153	0.638578	1	1303	967	937	893	566.53	909
	ENSMUSG00000001021.13	S100a3	0.777818	-2.73091	0.530726	0.477353	1	2	0	4	5	3.17	0
	ENSMUSG00000001023.10	S100a5	2.84327	-3.63609	2.42914	0.141934	1	0	0	0	1	1	0
	ENSMUSG00000001025.8	S100a6	-0.219647	5.48373	2.46538	0.139381	1	1692	1527	1491	1241	675	1260
	ENSMUSG00000001027.7	Scn4a	0.0462388	2.97961	0.0640628	0.803476	1	195	285	283	276	144	190
	ENSMUSG00000001029.15	Icam2	0.310615	4.98516	7.06942	0.0173784	1	737	1102	963	1008	705	937
	ENSMUSG00000001034.17	Mapk7	0.154969	4.81619	1.89126	0.188397	1	767	1002	863	826	581	837
	ENSMUSG00000001036.17	Epn2	0.19934	4.98588	3.07802	0.0988808	1	789	1143	989	1002	664	901
	ENSMUSG00000001039.12	B9d1	-0.162987	-0.537689	0.182096	0.675381	1	12	30	23	15	11	18
	ENSMUSG00000001052.15	Sec24b	0.109892	6.19367	1.03837	0.323672	1	2358	2285	2263	2225	1655	1831
	ENSMUSG00000001053.15	N4bp3	0.293714	3.82718	4.03031	0.0622493	1	323	518	422	432	325	417
	ENSMUSG00000001054.9	Rmnd5b	0.0452298	4.48473	0.154674	0.699405	1	676	778	713	665	437	621
	ENSMUSG00000001056.3	Nhp2	0.0837318	5.59347	0.529733	0.477451	1	1481	1582	1546	1441	863	1494
	ENSMUSG00000001062.18	Vps9d1	-0.0960402	4.61625	0.682837	0.421012	1	808	878	802	643	482	659
	ENSMUSG00000001065.15	Zfp276	0.20373	5.12634	3.36966	0.085451	1	900.37	1255.42	1056.17	1049.08	796.6	963.87
	ENSMUSG00000001076.7	C1ql4	2.01401	-3.74579	1.19744	0.292735	1	0	0	0	1	0	0
	ENSMUSG00000001082.12	Mfsd10	-0.040494	4.59599	0.0780316	0.783635	1	910	745	735	736	422	663
	ENSMUSG00000001089.14	Luzp1	0.0571037	5.68655	0.261187	0.616428	1	1653	1699	1605	1538	1171	1229
	ENSMUSG00000001095.5	Slc13a2	-1.75401	-3.74607	0.808868	0.384019	1	1	0	0	0	0	0
	ENSMUSG00000001098.15	Kctd10	-0.0684726	6.88944	0.358411	0.557943	1	4350.12	3882.3	3646.69	3480.49	2192.46	3139.03
	ENSMUSG00000001100.10	Poldip2	0.11641	5.01375	1.20993	0.287952	1	990	1047	1008	990	666	888
	ENSMUSG00000001103.7	Sebox	0	-3.86144	0	1	1	0	0	0	0	0	0
	ENSMUSG00000001105.15	Ift20	0.124768	4.13453	0.798556	0.38504	1	493	606	555	439	388	541
	ENSMUSG00000001119.7	Col6a1	-0.109171	4.4506	0.160639	0.701678	1	930	626	643	798	361	464
	ENSMUSG00000001120.15	Pcbp3	0.00103722	1.62738	2.08175e-05	0.996417	1	112	97	87	79	66	82
	ENSMUSG00000001123.15	Lgals9	-0.0609321	9.46336	0.28954	0.598073	1	21624	25270	24217	22431	12279	18347
	ENSMUSG00000001127.12	Araf	0.104467	6.10434	1.17474	0.29482	1	1900	2384	2264	2059	1486	1831
	ENSMUSG00000001128.7	Cfp	-0.00432805	7.5141	0.00142496	0.970365	1	5772	6382	5874	4590	3543	5653
	ENSMUSG00000001131.11	Timp1	-0.0503173	6.07375	0.0850817	0.777334	1	2616	2144	1928	1958	1112	2006
	ENSMUSG00000001134.9	Uxt	0.0188976	3.29187	0.0141365	0.906867	1	302.58	309.79	337.93	276.79	176.69	292.76
	ENSMUSG00000001138.13	Cnnm3	0.248817	4.07881	2.78887	0.114765	1	362	615	555	539	367	480
	ENSMUSG00000001143.13	Lman2l	0.656185	3.66637	2.73766	0.156336	1	174	441	371	376	445	307
	ENSMUSG00000001150.7	Mcm3ap	0.0162384	5.54508	0.0192943	0.891295	1	1347.82	1685.89	1548	1456.47	1038.89	1035
	ENSMUSG00000001151.10	Pcnt	-0.24137	5.92719	0.973591	0.362752	1	1524.99	2581.98	2447.98	2081.99	1095	1092.89
	ENSMUSG00000001155.13	Ftcd	0	-3.86144	0	1	1	0	0	0	0	0	0
	ENSMUSG00000001156.9	Mxd1	-0.317335	8.78017	6.5402	0.0213304	1	12395	19570	16526	12620	7159	10204
	ENSMUSG00000001157.13	Gmcl1	-0.0819931	3.73188	0.325597	0.576352	1	352	515	481	372	248	355
	ENSMUSG00000001158.13	Snrnp27	-0.12917	4.20813	1.12373	0.305179	1	563	693	644	514	336	487
	ENSMUSG00000001166.17	Oas1c	-0.236569	4.77258	3.44389	0.0823869	1	822.81	1068.78	1025.38	736.24	428.13	753.58
	ENSMUSG00000001168.16	Oas1h	0.361087	-0.760184	0.65496	0.430459	1	5	21	20	18	11	16
	ENSMUSG00000001173.15	Ocrl	0.0184217	3.7423	0.0171218	0.897558	1	401	450	453	419	285	309
	ENSMUSG00000001175.15	Calm1	0.0828535	9.20618	0.603058	0.448974	1	17558	20642	18403	16533	12065	17346
	ENSMUSG00000001211.15	Agpat3	0.0113406	6.43156	0.0121827	0.913513	1	2303	3211	3000	2630	1731	2210
	ENSMUSG00000001225.12	Slc26a3	-0.347347	-3.12362	0.0658504	0.800839	1	4	1	0	0	0	3
	ENSMUSG00000001227.12	Sema6b	-0.161952	4.03845	1.14017	0.301787	1	646	538	505	449	290	436
	ENSMUSG00000001228.14	Uhrf1	-0.113304	5.65098	0.0909618	0.776393	1	940.97	2067.77	2207.22	1842.85	888.86	985.38
	ENSMUSG00000001229.9	Dpp9	0.196098	5.65184	3.66283	0.0740784	1	1336	1698	1594	1504	1153	1376
	ENSMUSG00000001240.13	Ramp2	0.160992	3.73952	1.16407	0.296946	1	322.62	509.13	415.93	380.48	303.82	370
	ENSMUSG00000001247.16	Lsr	0.0297778	2.09162	0.0158266	0.901487	1	123.21	136.7	149.04	102.17	66.17	155.6
	ENSMUSG00000001248.15	Gramd1a	0.0685332	7.12866	0.50873	0.486173	1	4179.96	4973.99	4324	3889.94	3044.96	3830.92
	ENSMUSG00000001249.14	Hpn	0.205213	3.14017	1.0735	0.315877	1	176	302	331	310	165	245
	ENSMUSG00000001260.10	Gabrg1	-1.74732	-3.74682	0.812777	0.382904	1	0	0	1	0	0	0
	ENSMUSG00000001270.9	Ckb	-0.085153	3.22255	0.100464	0.758455	1	389.71	227.8	307.72	258.53	136.83	297.25
	ENSMUSG00000001280.13	Sp1	-0.155419	7.38235	2.15521	0.161866	1	4760	6718	5945	4555	3450	3855
	ENSMUSG00000001281.10	Itgb7	0.213632	4.82604	2.1558	0.163147	1	612	1051	947	830	682	764
	ENSMUSG00000001285.12	Myg1	0.235629	4.52799	2.55565	0.12986	1	484.58	841.29	779.03	689.23	508.27	681.8
	ENSMUSG00000001288.15	Rarg	0.346217	3.35711	4.12433	0.0595892	1	216	361	316	299	255	300
	ENSMUSG00000001289.12	Pfdn5	0.00178045	6.40105	0.000146642	0.990555	1	3123.44	2552.17	2570.21	2213.03	1596.48	2596.57
	ENSMUSG00000001300.16	Efnb2	-0.249954	2.44267	1.46239	0.244474	1	226	183	160	153	101	117
	ENSMUSG00000001305.5	Rrp15	0.136968	4.61137	1.00128	0.332198	1	857	730	685	737	494	708
	ENSMUSG00000001313.12	Rnd2	-0.648663	0.782474	5.02352	0.0398544	1	77.72	53.85	63.47	28.82	30.11	36.05
	ENSMUSG00000001323.17	Srr	-0.01508	3.98749	0.0130727	0.910423	1	485.61	527.64	550.21	454.43	344.87	381.82
	ENSMUSG00000001333.9	Sync	0.556811	-0.483251	2.37116	0.143537	1	12.16	22.27	18.34	17.29	17.24	24.17
	ENSMUSG00000001334.9	Fndc5	-0.75548	0.588078	4.3002	0.0570529	1	88	38	46	36	17	28
	ENSMUSG00000001348.15	Acp5	0.0821821	8.06395	0.522309	0.480503	1	6994.67	9933.74	8844.8	7191.51	5452.67	8138.61
	ENSMUSG00000001349.5	Cnn1	-0.328597	2.17034	0.43379	0.535847	1	249	117	108	163	47	99
	ENSMUSG00000001366.14	Fbxo9	-0.232263	4.50504	0.514388	0.50328	1	412	1072	970	675	403	509
	ENSMUSG00000001376.17	Vps50	0.0931896	4.13801	0.510983	0.485224	1	468	622	590	506	400	453
	ENSMUSG00000001380.7	Hars	-0.0577959	5.77539	0.274797	0.607466	1	1564.46	1903.15	2043.6	1725.51	1017.78	1350.36
	ENSMUSG00000001383.9	Zmat2	-0.0459307	5.88455	0.215997	0.648497	1	1823	2082	2006	1638	1123	1645
	ENSMUSG00000001403.13	Ube2c	-0.713424	5.03627	1.23685	0.325387	1	407.58	1929.35	1779	986.31	429	507.06
	ENSMUSG00000001415.10	Smg5	0.0307802	6.83335	0.0803888	0.780482	1	2938	4357	3897	3590	2300	2861
	ENSMUSG00000001416.13	Cct3	0.144396	7.87137	1.54003	0.232865	1	8014	6957	6793	7130	5078	6362
	ENSMUSG00000001418.13	Glmp	0.133967	5.9052	1.62561	0.220887	1	1577.43	2154.62	1922.86	1701.72	1254.28	1778.13
	ENSMUSG00000001419.17	Mef2d	0.0699608	7.19282	0.567607	0.462378	1	4370.87	5163.71	4547.14	4489.66	3051.02	3802.77
	ENSMUSG00000001420.13	Tmem79	0.230697	-0.269692	0.41221	0.530128	1	13.57	27.38	29.14	23.28	20.72	17.87
	ENSMUSG00000001424.14	Snd1	0.0819282	7.03268	0.679477	0.422133	1	4251	4234	4006	3816	2693	3677
	ENSMUSG00000001435.15	Col18a1	-0.108186	4.87568	0.209812	0.6611	1	1291	829	829	912	533	708
	ENSMUSG00000001436.15	Slc19a1	0.095726	5.11451	0.778474	0.390938	1	951	1228	1128	1088	662	977
	ENSMUSG00000001440.5	Kpnb1	0.0968772	8.3792	0.835245	0.374604	1	8651	11954	11273	10309	7078	8648
	ENSMUSG00000001441.13	Npepps	0.0771589	5.88931	0.610853	0.446112	1	1767	2050	1867	1812	1284	1493
	ENSMUSG00000001444.2	Tbx21	0.24431	4.62795	3.86993	0.0671157	1	670	793	766	736	487	814
	ENSMUSG00000001445.10	Mrpl10	0.297524	5.17899	6.47398	0.0218942	1	879.94	1261.93	1076.79	1085	772.69	1164.81
	ENSMUSG00000001467.5	Cyp51	-0.0487721	3.74832	0.128282	0.724998	1	422	475.48	442.49	400	239	365
	ENSMUSG00000001472.17	Tcf25	-0.0545056	8.22719	0.324627	0.576915	1	9517	10764	9808	8602	5919	7740
	ENSMUSG00000001473.7	Tubb6	-0.380606	5.56475	0.86233	0.401256	1	2531	1339	1286	1262	635	1275
	ENSMUSG00000001482.15	Def8	0.0501616	4.06114	0.112071	0.742236	1	429	586	603	583	293	427
	ENSMUSG00000001493.9	Meox1	0.454052	-0.0124669	1.98724	0.178162	1	19	29	30	24	23	34
	ENSMUSG00000001494.6	Sost	-0.551199	-3.27788	0.178635	0.67829	1	1	1	2	0	0	2
	ENSMUSG00000001496.15	Nkx2-1	0	-3.86144	0	1	1	0	0	0	0	0	0
	ENSMUSG00000001497.18	Pax9	-1.32999	-2.36861	3.03152	0.101248	1	3	5	9	2	1	2
	ENSMUSG00000001504.10	Irx2	-0.480089	-3.54161	0.0819611	0.778406	1	0	2	0	0	0	1
	ENSMUSG00000001506.10	Col1a1	-0.0555765	4.95826	0.0252082	0.880308	1	1325	854	891	1232	501	636
	ENSMUSG00000001507.16	Itga3	0.322233	3.20672	0.791811	0.406472	1	168	361	287	174	217	367
	ENSMUSG00000001508.15	Sgca	-0.88549	-2.7469	0.840809	0.373059	1	5	3	2	2	2	0
	ENSMUSG00000001510.8	Dlx3	-0.981375	-3.44471	0.389923	0.541323	1	2	0	1	0	1	0
	ENSMUSG00000001517.14	Foxm1	-0.424179	4.68665	1.59041	0.261965	1	557	1233.99	1152.97	829.98	420	433.98
	ENSMUSG00000001518.12	Itfg2	-0.0118845	3.97791	0.00764825	0.931418	1	530	533	485	472	334	373
	ENSMUSG00000001520.12	Nrip2	-0.0225093	1.29222	0.00967786	0.922881	1	71	90	76	76	49	54
	ENSMUSG00000001521.12	Tulp3	0.172005	4.45096	1.95538	0.18148	1	671	703	644	717	421	629
	ENSMUSG00000001524.14	Gtf2h4	0.183493	3.37986	1.31144	0.269318	1	240	365	357	307	226	298
	ENSMUSG00000001525.10	Tubb5	0.0098074	8.98442	0.00595662	0.939458	1	12343	19363	18456	16085	9737	12937
	ENSMUSG00000001552.14	Jup	0.361553	4.04713	4.74937	0.0456813	1	354	541	537	432	437	506
	ENSMUSG00000001555.10	Fkbp10	0.0925713	2.8907	0.313739	0.583312	1	210.61	273.23	220	216.54	159.85	195.84
	ENSMUSG00000001558.5	Klhl10	-0.729984	-2.49754	0.881124	0.362134	1	5	4	4	4	1	1
	ENSMUSG00000001566.9	Mnx1	0	-3.86144	0	1	1	0	0	0	0	0	0
	ENSMUSG00000001569.10	Nom1	0.0752276	5.55419	0.52929	0.477632	1	1440	1588	1474	1516	905	1255
	ENSMUSG00000001576.15	Ergic1	0.0579143	6.31953	0.339945	0.568155	1	2159	2990	2600	2344	1654	2159
	ENSMUSG00000001583.13	Tnk1	0.114417	-0.899143	0.0540562	0.819158	1	12.16	17.57	14.96	4.48	10.63	21.26
	ENSMUSG00000001588.12	Acap1	0.19964	6.71472	3.67325	0.0737084	1	2675	3758	3254	3163	2451	2815
	ENSMUSG00000001604.14	Tcea3	0.311243	-0.739627	0.428533	0.522324	1	19	14	14	6	15	23
	ENSMUSG00000001622.15	Csn3	2.8151	-3.63872	2.17957	0.162508	1	0	0	0	2	0	0
	ENSMUSG00000001627.12	Ifrd1	0.163707	5.8281	2.22202	0.155902	1	1732.17	1737.79	1791.12	1607.13	1166.94	1765.62
	ENSMUSG00000001630.13	Stk38l	-0.209913	3.54087	1.80867	0.197805	1	445.87	387.98	380.4	292.41	222.48	293.33
	ENSMUSG00000001632.16	Brpf1	-0.107539	6.22428	1.22073	0.285888	1	2400.87	2795.88	2445.93	2239.94	1422.96	1803.82
	ENSMUSG00000001642.18	Akr1b3	0.0067212	6.4628	0.00392862	0.950815	1	2963.08	2861.81	2806.51	2361.97	1793.33	2509.25
	ENSMUSG00000001655.6	Hoxc13	0	-3.86144	0	1	1	0	0	0	0	0	0
	ENSMUSG00000001656.3	Hoxc11	0	-3.86144	0	1	1	0	0	0	0	0	0
	ENSMUSG00000001657.7	Hoxc8	0	-3.86144	0	1	1	0	0	0	0	0	0
	ENSMUSG00000001661.5	Hoxc6	-0.990541	-3.44793	0.468556	0.503648	1	1	1	1	0	0	1
	ENSMUSG00000001663.10	Gstt1	-0.178215	2.74291	0.928949	0.349771	1	216	249	228	156	114	201
	ENSMUSG00000001665.11	Gstt3	-0.0334805	1.53274	0.0210373	0.886526	1	78.38	101	103	68	53	90
	ENSMUSG00000001666.8	Ddt	-0.076874	3.69709	0.257051	0.619211	1	440.84	435	425	322	241	387
	ENSMUSG00000001670.13	Tat	-0.557943	-3.05799	0.224436	0.642212	1	0	3	3	2	1	0
	ENSMUSG00000001672.14	Marveld3	0.626928	-1.54428	1.02767	0.326226	1	5	9	8	2	12	11
	ENSMUSG00000001674.11	Ddx18	0.221627	6.01143	5.49308	0.0326277	1	1769.75	2100.42	2003.42	1989.37	1417.52	1838.41
	ENSMUSG00000001687.15	Ubl3	-0.172549	6.44823	2.09384	0.167596	1	3328	3108	2628	2406	1538	2304
	ENSMUSG00000001700.10	Gramd3	-0.487718	7.74506	2.17516	0.204285	1	11471	6529	6191	5241	3646	4620
	ENSMUSG00000001707.8	Eef1e1	-0.0510935	4.3067	0.156788	0.697469	1	613	730	638	576	338	569
	ENSMUSG00000001729.14	Akt1	0.0600765	6.93204	0.360288	0.556925	1	3676	4323	3793	3500	2332	3644
	ENSMUSG00000001739.14	Cldn15	-0.0408754	0.649031	0.0177144	0.895812	1	33	54	64	43	39	28
	ENSMUSG00000001741.12	Il16	0.0991617	7.2571	0.744038	0.401375	1	3769.64	5889.24	5016.65	4339.9	3466.82	4056.17
	ENSMUSG00000001750.16	Tcirg1	0.00161611	7.39514	0.000288277	0.986668	1	5339	5930	5299	4711	3427	4580
	ENSMUSG00000001751.9	Naglu	0.182193	4.2226	1.53436	0.233688	1	439	638	652	497	411	579
	ENSMUSG00000001755.12	Coasy	0.150655	4.26302	1.46009	0.244829	1	515	665	614	560	441	511
	ENSMUSG00000001761.7	Smo	0.0206113	2.15125	0.0105617	0.919449	1	118	148	163	146	81	110
	ENSMUSG00000001763.14	Tspan33	-0.836974	5.70553	1.24822	0.323552	1	630	3163	2974	1714	656	549
	ENSMUSG00000001767.5	Crnkl1	0.0664739	5.07542	0.277848	0.605496	1	836	1244	1183	1117	676	830
	ENSMUSG00000001773.14	Folh1	0.00305931	0.584572	4.62092e-05	0.994711	1	23	72	49	32	48	24
	ENSMUSG00000001774.8	Chordc1	0.384833	5.55153	2.20599	0.190181	1	858	1845	1366	1343	1319	1261
	ENSMUSG00000001783.3	Rtcb	-0.00454799	7.04797	0.00232301	0.962168	1	4104	4615	4337	3682	2608	3709
	ENSMUSG00000001785.13	Pwp1	-0.0406448	5.32421	0.136056	0.717168	1	1348	1319	1316	1127	756	1112
	ENSMUSG00000001786.14	Fbxo7	-0.345465	5.31518	1.78025	0.231501	1	891.42	1823.46	1729.04	1231.74	666.43	783.44
	ENSMUSG00000001794.13	Capns1	-0.0265184	6.97685	0.0644151	0.802948	1	4226	4316	3947	3532	2335	3623
	ENSMUSG00000001802.16	Lrp3	0.229965	0.622958	0.713327	0.411047	1	46.58	36.61	50	46.36	31	43.73
	ENSMUSG00000001804.9	Dsg4	0	-3.86144	0	1	1	0	0	0	0	0	0
	ENSMUSG00000001815.15	Evx2	0	-3.86144	0	1	1	0	0	0	0	0	0
	ENSMUSG00000001819.4	Hoxd13	2.0231	-3.74498	1.19041	0.294098	1	0	0	0	0	0	1
	ENSMUSG00000001823.5	Hoxd12	0	-3.86144	0	1	1	0	0	0	0	0	0
	ENSMUSG00000001827.12	Folr1	-0.62849	-1.07151	1.5136	0.236734	1	8	14	26	14	5	5
	ENSMUSG00000001829.17	Clpb	0.0637885	4.2103	0.261368	0.616307	1	537	604	637	572	389	466
	ENSMUSG00000001833.17	2007-09-01	-0.15481	6.7298	2.79406	0.114453	1	3413	3983	3628.62	3038	1972	2617
	ENSMUSG00000001844.10	Zdhhc4	-0.0945949	4.95843	0.462681	0.506572	1	1212	989	929	909	567	810
	ENSMUSG00000001847.14	Rac1	-0.0266711	7.79876	0.059994	0.809683	1	7453.77	7634.24	6997.08	6033.18	4169.16	6544.1
	ENSMUSG00000001855.15	Nup214	0.10233	6.18771	1.02872	0.32586	1	2194.91	2382.31	2340	2240.81	1628.27	1811.85
	ENSMUSG00000001864.13	Aif1l	-0.474045	-0.495608	1.46318	0.244352	1	31	20	21	11	10	19
	ENSMUSG00000001865.2	Cpa3	-0.393118	0.368215	1.60554	0.223622	1	48	55	33	23	26	29
	ENSMUSG00000001870.16	Ltbp1	0.218503	4.76668	3.52308	0.0792601	1	795	912	769	925	586	709
	ENSMUSG00000001891.16	Ugp2	-0.0299695	5.23168	0.0803824	0.78049	1	1175	1349	1213	1087	694	1046
	ENSMUSG00000001901.15	Kcnh6	0.155062	-1.44883	0.104124	0.751199	1	7	13	8	12	6	6
	ENSMUSG00000001909.16	Trmt1	-0.00648735	6.51165	0.00381666	0.95152	1	3086	3069	2821	2498	1808	2575
	ENSMUSG00000001910.5	Nacc1	0.0629104	7.06921	0.427003	0.522934	1	4035.59	4700.07	4216.86	4306.04	2755.31	3356.19
	ENSMUSG00000001911.16	Nfix	0.0209488	5.2045	0.0322192	0.859847	1	975.18	1300.18	1341.48	1176.16	716.35	932.99
	ENSMUSG00000001918.17	Slc1a5	0.136662	7.82409	1.90943	0.186405	1	6127	7926	7297	6564	5045	6241
	ENSMUSG00000001924.15	Uba1	0.187774	8.22671	3.79336	0.0695965	1	8576	9623	9401	9638	6345	8228
	ENSMUSG00000001930.17	Vwf	-0.0573311	4.45568	0.0386203	0.85077	1	954	606	605	781	342	541
	ENSMUSG00000001942.8	Siae	0.18878	3.44439	1.2652	0.277599	1	234.59	409.33	363.59	339.61	238.58	293.68
	ENSMUSG00000001943.8	Vsig2	-0.153339	0.80133	0.211137	0.652538	1	76	48	47	43	20	59
	ENSMUSG00000001946.14	Esam	-0.0087176	5.02743	0.00429813	0.948557	1	1136	1172	901	836	652	959
	ENSMUSG00000001948.10	Spa17	-0.256855	-1.26926	0.256632	0.619494	1	11	10	16	4	10.07	9
	ENSMUSG00000001962.8	Fam50a	0.243773	4.08829	2.55735	0.129741	1	364	589	590	501	390	492
	ENSMUSG00000001964.14	Emd	0.0251548	5.5641	0.0514701	0.823457	1	1550.27	1565.2	1487.04	1274.8	942.94	1384.98
	ENSMUSG00000001983.7	Taco1	0.190619	2.91043	0.885026	0.361101	1	150.8	294.64	249.68	257.75	164.03	181.41
	ENSMUSG00000001985.9	Grik3	-1.75401	-3.74607	0.808868	0.384019	1	1	0	0	0	0	0
	ENSMUSG00000001986.16	Gria3	-0.615597	1.10029	4.00209	0.0633261	1	106	63	73	65	25	36
	ENSMUSG00000001988.9	Npas1	-0.143038	-0.549773	0.138115	0.715138	1	15	27	22	12	17	14
	ENSMUSG00000001995.9	Sipa1l2	-0.166548	4.05385	1.18386	0.293018	1	659	557	494	437	335	400
	ENSMUSG00000001998.15	Ap4e1	-0.141986	4.08788	0.898475	0.357576	1	522	649	584	492	380	333
	ENSMUSG00000001999.15	Blvra	0.162284	4.19491	1.46484	0.244097	1	480	623	601	489	399	562
	ENSMUSG00000002006.12	Pdzd4	0.456703	2.09699	3.98176	0.0636775	1	84	136.55	133	181.51	83.28	112.57
	ENSMUSG00000002010.17	Idh3g	0.0731991	6.01913	0.53008	0.477309	1	1756	2309	2184	1998	1261	1801
	ENSMUSG00000002012.13	Pnck	-0.0018805	-1.53677	1.01189e-05	0.997502	1	13	8	6	6	4	11
	ENSMUSG00000002014.12	Ssr4	-0.0315514	5.88488	0.0640632	0.80349	1	1927	1962	1977	1489	1077	1864
	ENSMUSG00000002015.5	Bcap31	0.175331	5.767	3.14957	0.0953661	1	1575	1804	1659	1587	1201	1560
	ENSMUSG00000002017.10	Fam98a	0.151967	5.08514	2.0947	0.167514	1	917	1169	1088	1021	722	955
	ENSMUSG00000002020.15	Ltbp2	0.325279	4.65605	3.30397	0.0973275	1	904.79	651	618.81	880.29	535.78	717
	ENSMUSG00000002028.13	Kmt2a	0.0793256	7.84305	0.0900443	0.775337	1	4768	9343.99	8189.98	7242.99	5677.97	4685.99
	ENSMUSG00000002031.13	Ift46	-0.000422346	3.25763	7.1446e-06	0.997901	1	324	336	274	271	200	245
	ENSMUSG00000002032.17	Tmem25	-0.580678	-2.54508	0.499918	0.489915	1	2	6	4	1	1	4
	ENSMUSG00000002033.14	Cd3g	0.166487	3.7991	1.3071	0.270081	1	356	511	428	388	335	372
	ENSMUSG00000002043.17	Trappc6a	0.161235	3.94372	1.46122	0.244655	1	473	486	464	437	323	463
	ENSMUSG00000002052.6	Supt6	-0.0527444	7.08101	0.284878	0.601009	1	4468.36	4598.04	4482.81	4023.48	2775.32	3244.65
	ENSMUSG00000002055.9	Spag5	-0.775245	4.58071	1.65074	0.264543	1	393	1358	1282	770	318	277
	ENSMUSG00000002057.4	Foxn1	0	-3.86144	0	1	1	0	0	0	0	0	0
	ENSMUSG00000002058.13	Unc119	0.0192059	4.12878	0.0209892	0.886655	1	553	635	519	525	314	502
	ENSMUSG00000002059.18	Rab34	-0.134815	2.09054	0.427231	0.522824	1	143	167	122	126	68	112
	ENSMUSG00000002064.10	Sdf2	0.102447	5.14731	0.942613	0.346351	1	975.64	1271.96	1128.19	1065.52	711.68	1004.35
	ENSMUSG00000002068.16	Ccne1	-0.253955	4.29442	0.317154	0.600121	1	376	819	930	757	314	314
	ENSMUSG00000002076.12	Hsf2bp	-0.502754	-1.93174	0.697435	0.416195	1	5	7	10	7	2	3
	ENSMUSG00000002083.13	Bbc3	-0.357706	3.76819	5.49385	0.0326171	1	401	586	522	320	216	367
	ENSMUSG00000002100.15	Mybpc3	-0.337284	0.641167	1.23523	0.28315	1	63	52	47	32	20	48
	ENSMUSG00000002102.15	Psmc3	-0.0205854	6.58793	0.0385577	0.846851	1	2776	3456	3336	2928	1682	2705.3
	ENSMUSG00000002103.16	Acp2	0.396862	6.5946	4.24499	0.0762416	1	1823.12	3439.23	3060.03	2794.81	2529.21	2853.18
	ENSMUSG00000002104.11	Rapsn	-0.470849	-1.00499	1.04566	0.322031	1	23	10	15	9	6	12
	ENSMUSG00000002105.15	Slc39a13	0.130123	3.87167	0.890117	0.359761	1	383	517	478	399	316	431.7
	ENSMUSG00000002107.18	Celf2	-0.19187	7.17197	2.14489	0.166526	1	5508	5146	4413	3614	3143	3268
	ENSMUSG00000002108.10	Nr1h3	0.682301	6.36786	6.33609	0.0509086	1	1215	2620	2506	2586	2202	2831
	ENSMUSG00000002109.14	Ddb2	0.0811134	3.6142	0.249127	0.624623	1	381.88	397.77	384.97	320.19	313.79	292.82
	ENSMUSG00000002111.8	Spi1	0.0677832	6.77771	0.478566	0.499192	1	3310	3748	3498	3201	2104	3235
	ENSMUSG00000002129.11	Sf3a1	0.168295	6.39059	2.85846	0.110677	1	2203	2810	2794	2585	1863	2247
	ENSMUSG00000002147.18	Stat6	0.220611	7.48595	3.86254	0.0673505	1	4391	6430	5605	5346	4338	4754
	ENSMUSG00000002190.13	Clgn	-0.0113149	-2.32073	0.000190072	0.989174	1	1	3	9	6	2	2
	ENSMUSG00000002204.9	Napsa	0.178907	7.78487	2.53946	0.130995	1	7124.16	6765.78	6400.09	6375.6	4536.07	6829.22
	ENSMUSG00000002205.16	Vrk3	0.209191	5.15415	3.52391	0.0792281	1	907	1194	1161.98	1043	819	1003
	ENSMUSG00000002210.11	Smg9	0.0683501	4.94187	0.397052	0.537694	1	967	1030	950	900	656	813
	ENSMUSG00000002221.11	Paxip1	-0.0719251	5.0181	0.308183	0.586633	1	896	1206	1179	1056	646	695
	ENSMUSG00000002222.14	Rmnd5a	-0.16011	6.10452	2.09796	0.167204	1	1901	2831	2469	1870	1403	1612
	ENSMUSG00000002227.15	Mov10	0.228424	7.67115	5.98118	0.026672	1	5636	6754	6137	6264	4500	5848
	ENSMUSG00000002228.7	Ppm1j	-0.36498	0.196468	1.29298	0.272584	1	47	40	31	23	16	32
	ENSMUSG00000002233.13	Rhoc	0.0028351	5.77459	0.00011585	0.991789	1	2277	1569	1464	1611	896	1701
	ENSMUSG00000002240.12	Prr27	0	-3.86144	0	1	1	0	0	0	0	0	0
	ENSMUSG00000002249.21	Tead3	0.32642	2.22851	2.83215	0.112202	1	119	150	137	134	99	157
	ENSMUSG00000002250.16	Ppard	-0.0249332	4.98841	0.0403954	0.843294	1	1125	1050	958	877	599	908
	ENSMUSG00000002257.8	Def6	0.00951911	4.93822	0.00754756	0.93187	1	854.7	1139.31	1024.15	880.88	602.08	844.64
	ENSMUSG00000002265.17	Peg3	-0.414388	0.434615	1.32858	0.266938	1	63	36	43	23	34	23
	ENSMUSG00000002266.17	Zim1	-0.225512	-2.3154	0.10544	0.749689	1	4	4	6	3	4	2
	ENSMUSG00000002274.13	Metrn	0.0687997	2.99382	0.153401	0.700579	1	232	261	267	245	131	246
	ENSMUSG00000002279.19	Lmf1	0.0846253	3.28583	0.296211	0.593926	1	285	336	307	299	222	229
	ENSMUSG00000002280.11	Ciao3	0.143035	4.44228	1.53067	0.234227	1	632.29	736.67	663.65	690.55	447.35	590.7
	ENSMUSG00000002289.16	Angptl4	-0.0989085	5.07732	0.607036	0.44751	1	890	1405	1169	1052	600	838
	ENSMUSG00000002297.16	Dbf4	-0.434972	4.48943	4.59134	0.0600908	1	609	1002	948	722	343	403
	ENSMUSG00000002307.16	Daxx	-0.176177	9.44649	2.64746	0.123646	1	23435	25033	24386	20609	12337	17076
	ENSMUSG00000002308.16	Cd320	0.471714	2.62872	6.1287	0.025126	1	148	204	157	190	126	227
	ENSMUSG00000002320.15	Tm9sf1	0.0150529	5.9654	0.0208737	0.886965	1	1655.15	2343.51	2156.96	1849.38	1259.58	1645.35
	ENSMUSG00000002324.8	Rec8	-0.088631	2.40108	0.10999	0.745803	1	98	210	228	177	101	107
	ENSMUSG00000002325.15	Irf9	-0.0209654	7.99808	0.0454717	0.833888	1	7183	9439.44	8854.81	7519	5062	6659.53
	ENSMUSG00000002326.6	Gmpr2	0.169523	3.95551	1.58437	0.226557	1	396.59	551.39	493.23	444.92	324.92	467.41
	ENSMUSG00000002329.7	Mdp1	0.156258	4.6454	1.70619	0.210324	1	633	913	796	749	544	694
	ENSMUSG00000002332.16	Dhrs1	0.0925604	4.18077	0.346013	0.564758	1	565	593	563	440	347	624
	ENSMUSG00000002341.8	Ncan	0.604149	-2.35639	0.758918	0.396814	1	4	4	2	5	2	5
	ENSMUSG00000002342.17	Tmem161a	0.111905	4.29783	0.716644	0.409985	1	486	690	692	596	391	561
	ENSMUSG00000002343.11	Armc6	0.288847	2.8861	1.93364	0.183789	1	133.44	281.7	244.74	241.64	159.21	211.53
	ENSMUSG00000002345.18	Borcs8	0.240657	3.20204	2.54521	0.13059	1	256	299	272	287	192	273
	ENSMUSG00000002346.16	Slc25a42	-0.102617	2.95858	0.0565892	0.820427	1	117	376	310	242	181	133
	ENSMUSG00000002365.10	Snx9	0.0384292	5.74957	0.139187	0.714087	1	1756	1763	1691	1647	1063	1429
	ENSMUSG00000002372.9	Ranbp3	0.0356941	6.56076	0.142289	0.711074	1	2876	3347	2968	2929	1845	2496
	ENSMUSG00000002379.7	Ndufa11	-0.0325169	4.3846	0.0671846	0.798854	1	679	721	672	595	374	601
	ENSMUSG00000002384.2	Bmp8b	-0.0923379	-1.32372	0.0424519	0.839413	1	10.01	12.65	11	10	8.01	6.01
	ENSMUSG00000002393.14	Nr2f6	0.337363	3.20469	3.62832	0.0753198	1	201.15	340.3	264.63	257.78	212.01	299.77
	ENSMUSG00000002395.14	Use1	-0.165633	5.85854	2.29488	0.149705	1	2046	2061	1914	1550	1015	1593
	ENSMUSG00000002409.18	Dyrk1b	-0.103772	2.6997	0.20599	0.656614	1	132	299	235	206	106	164
	ENSMUSG00000002413.15	Braf	-0.267865	5.01447	5.564	0.0316736	1	1155	1206	1103.71	830	645	721.68
	ENSMUSG00000002416.13	Ndufb2	0.0546153	4.1657	0.168326	0.687157	1	515.94	620	596.18	557.96	312	528.14
	ENSMUSG00000002428.12	Hltf	-0.0747235	5.06817	0.359359	0.557429	1	910.99	1384.96	1114.94	990.23	707	760.95
	ENSMUSG00000002455.14	Prpf6	0.0684414	5.69677	0.431963	0.520562	1	1376	1846	1785	1567	1074	1375
	ENSMUSG00000002459.17	Rgs20	-1.57273	-2.45337	3.14645	0.0955162	1	7	3	6	1	0	3
	ENSMUSG00000002475.16	Abhd3	-0.408829	-2.133	0.276	0.606687	1	1	13	4	2	3	5
	ENSMUSG00000002477.5	Snrpd1	0.0132484	5.41489	0.0122702	0.913204	1	1447.83	1346.87	1363.88	1257	766	1246.9
	ENSMUSG00000002486.15	Tchp	0.208285	3.69763	1.68572	0.212944	1	283	484	425.97	409.95	297	337
	ENSMUSG00000002489.16	Tiam1	-0.435674	4.06837	5.30666	0.0405226	1	732	563	578	517	257	318
	ENSMUSG00000002496.10	Tsc2	0.244437	5.42119	5.18819	0.0371271	1	1094.27	1443.73	1338.73	1345.65	1001.96	1145.68
	ENSMUSG00000002500.15	Rpl3l	0.340301	-2.98691	0.12667	0.726654	1	2	2	1	3	1	1
	ENSMUSG00000002504.15	Slc9a3r2	0.179219	3.30245	0.301408	0.600473	1	155	408	360	242	260	267
	ENSMUSG00000002524.17	Puf60	0.148546	6.7343	2.51507	0.132727	1	3153	3517	3276	3226	2184	3080
	ENSMUSG00000002546.16	Golga2	-0.00066452	5.704	4.15057e-05	0.994941	1	1463	1908	1781	1628	1015	1319
	ENSMUSG00000002550.16	Uck1	0.127788	5.24803	1.52305	0.235341	1	1113.93	1337.69	1128.21	1133.27	796.85	1068.28
	ENSMUSG00000002565.16	Scin	0.105411	1.92326	0.2707	0.610133	1	113	128	113	109	71	114
	ENSMUSG00000002578.18	Ikzf4	-0.352031	2.70099	2.45592	0.137748	1	296	207	198	195	113	122
	ENSMUSG00000002588.13	Pon1	0.0901198	-1.86244	0.0211325	0.886271	1	4	12	4	7	6	3
	ENSMUSG00000002602.16	Axl	0.0910353	8.74503	0.823261	0.377966	1	12623	15144	13250	12419	9144	11827
	ENSMUSG00000002603.15	Tgfb1	0.196484	6.49966	4.048	0.0617382	1	2742	2818	2727	2772	1896	2656
	ENSMUSG00000002608.8	Ccdc97	0.173321	5.90727	2.8878	0.109007	1	1583	2179	1822	1888	1224	1721
	ENSMUSG00000002617.14	Zfp40	0.0503819	2.21707	0.0730632	0.790454	1	135	154	155	132	93	128
	ENSMUSG00000002625.10	Akap8l	0.139335	5.8954	1.06882	0.319359	1	1331	2284	2021	1794	1357	1536
	ENSMUSG00000002633.4	Shh	0	-3.86144	0	1	1	0	0	0	0	0	0
	ENSMUSG00000002635.11	Pdcd2l	0.064404	3.86397	0.246325	0.626562	1	407	517	477	445	289	392
	ENSMUSG00000002658.9	Gtf2f1	-0.172218	5.91027	2.60301	0.126608	1	1919	2215	2144	1835	1000	1502
	ENSMUSG00000002660.8	Clpp	0.189695	3.94279	1.99513	0.177352	1	420	549	447	484	297	465
	ENSMUSG00000002661.14	Alkbh7	0.42285	1.84912	3.53427	0.0788299	1	79	116	106	94	98	110
	ENSMUSG00000002664.2	Pspn	-0.528634	-3.05395	0.22863	0.639142	1	1	3	2	0	2	1
	ENSMUSG00000002668.8	Dennd1c	0.247256	5.76794	4.0292	0.0622815	1	1248	1970	1730	1709	1309	1419
	ENSMUSG00000002679.14	Med6	-0.0873424	3.77883	0.410404	0.531019	1	400	483	506	407	265	333
	ENSMUSG00000002688.8	Prkd1	0.0116266	0.813382	0.00148234	0.969774	1	69	50	45	67	28	36
	ENSMUSG00000002699.13	Lcp2	-0.0402709	6.84163	0.133885	0.719328	1	4014	3698	3682	3180	2157	3247
	ENSMUSG00000002718.14	Cse1l	0.0566262	6.46493	0.346367	0.564562	1	2520	3039	2986	2741	1831	2249
	ENSMUSG00000002728.14	Naa20	-0.171511	6.12582	1.25947	0.286793	1	2854.56	2142.44	2207.17	2018.23	1217.19	1774.79
	ENSMUSG00000002731.6	Prkra	-0.142636	2.15189	0.534358	0.475566	1	146	149	156	136	79	102
	ENSMUSG00000002732.14	Fkbp7	-0.526157	1.42242	3.63382	0.0751204	1	130	84	84	68	32	64
	ENSMUSG00000002733.8	Plekha3	-0.2424	5.06671	5.24934	0.0361697	1	1152	1247	1169	864	613	841
	ENSMUSG00000002741.9	Ykt6	-0.10259	6.22551	1.10177	0.309793	1	2458	2728	2441	2179	1357	1960
	ENSMUSG00000002748.7	Baz1b	0.097852	7.49395	0.372617	0.555845	1	4042	6829	6460	5800	4106	4128
	ENSMUSG00000002767.13	Mrpl2	0.106129	4.42825	0.742243	0.401931	1	642	678	715	634	417	642
	ENSMUSG00000002768.8	Mea1	0.225083	4.80492	3.73377	0.0716017	1	780.97	905.99	850.37	804.27	582	890.66
	ENSMUSG00000002769.9	Gnmt	0.360124	1.91892	0.349327	0.579892	1	93	124	106	40	74	199
	ENSMUSG00000002771.12	Grin2d	0.786147	-0.861812	3.6234	0.0754988	1	9	18	9	14	15.71	17
	ENSMUSG00000002778.14	Kdelr1	6.22194e-05	5.34835	3.04148e-07	0.999567	1	1169	1486	1366	1048	825	1192
	ENSMUSG00000002781.19	Tmem143	0.112003	2.15354	0.28	0.604115	1	99	169	151	144	79	126
	ENSMUSG00000002791.17	Pdxk-ps	-0.70268	-2.13159	1.1668	0.296399	1	6	5	8	4	1	4
	ENSMUSG00000002797.9	Ggct	0.24959	4.04455	3.45358	0.0819963	1	493	500	484	474	399	464
	ENSMUSG00000002799.6	Jag2	-0.206709	1.74582	0.925062	0.350752	1	111	135	101	81	69	78
	ENSMUSG00000002803.14	Btbd6	0.194571	2.36789	1.01131	0.329862	1	119	196	158	154	109	149
	ENSMUSG00000002804.4	Nudt14	0.263899	2.06626	1.62839	0.22051	1	111	123	136	108	100	129
	ENSMUSG00000002808.7	Epdr1	-0.19444	2.58536	0.361031	0.563653	1	126	209	293	221	102	103
	ENSMUSG00000002812.4	Flii	0.130881	7.14283	1.9847	0.178423	1	4277	4705	4301	4239	3029	3890
	ENSMUSG00000002814.15	Top3a	-0.457037	5.00508	3.25047	0.119858	1	1579	980	1035	892	502	672
	ENSMUSG00000002820.6	Atg4d	-0.242862	5.53531	5.49965	0.032538	1	1421.76	1820.12	1721.04	1318.52	830.93	1076.74
	ENSMUSG00000002825.8	Qtrt1	0.242034	4.15142	2.99225	0.103301	1	504	557	538	466	393	584
	ENSMUSG00000002831.14	Plin4	-0.113024	3.35574	0.357069	0.558673	1	371	392	276	356	182	212
	ENSMUSG00000002833.11	Hdgfl2	0.0370174	5.86695	0.139096	0.714176	1	1642	2135	1916	1690	1245	1516
	ENSMUSG00000002835.9	Chaf1a	-0.165298	4.86894	0.312867	0.598035	1	626.21	1154.16	1290.94	1041.9	476.96	607.24
	ENSMUSG00000002844.9	Adprh	0.0922417	6.32562	0.789777	0.387602	1	2487	2743	2412	2323	1545	2423
	ENSMUSG00000002845.14	Tmem39a	0.21551	4.64348	3.08439	0.0985619	1	686.95	867.98	726	711	608.9	682
	ENSMUSG00000002846.9	Timmdc1	0.350145	3.32288	3.79714	0.0694713	1	203	379	291	293	242	302
	ENSMUSG00000002847.7	Pla1a	0.099546	4.9254	0.781611	0.390008	1	833	1150	918	936	610	838
	ENSMUSG00000002870.8	Mcm2	-0.0892343	6.39635	0.145756	0.715812	1	1996	3141	3484	2993	1563	1704
	ENSMUSG00000002871.14	Tpra1	0.0894569	4.48597	0.251682	0.625545	1	453	923	788	677	454	617
	ENSMUSG00000002881.14	Nab1	-0.158793	6.24332	1.78251	0.200908	1	2907	2459	2443	2152	1408	1872
	ENSMUSG00000002885.14	Adgre5	0.182264	7.69699	3.47461	0.0811568	1	5698.95	6759.69	6724.56	6045.55	4663.6	5883.7
	ENSMUSG00000002897.5	Il17ra	-0.0991913	7.06484	0.828297	0.376548	1	4879	4471	4215	3916	2566	3328
	ENSMUSG00000002900.16	Lamb1	-0.116479	2.70927	0.29956	0.591867	1	261	206	190	225	113	139
	ENSMUSG00000002908.17	Kcnn1	0.145698	-0.199519	0.152424	0.701484	1	12	28	36	25	17	22
	ENSMUSG00000002910.11	Arrdc2	0.111733	3.89626	0.670455	0.425167	1	388	568	458	434	320	408
	ENSMUSG00000002930.6	Ppp1r17	0	-3.86144	0	1	1	0	0	0	0	0	0
	ENSMUSG00000002948.19	Map2k7	-0.0259305	6.10458	0.0723471	0.791458	1	2147	2496.73	2198.35	2100.72	1317.74	1767.74
	ENSMUSG00000002949.15	Timm44	-0.0475064	5.64582	0.197749	0.662623	1	1695	1646	1649	1450	938	1353
	ENSMUSG00000002957.11	Ap2a2	-0.0396941	5.98906	0.159002	0.695456	1	2012.99	2160.95	2158.35	1916.98	1168.98	1688.99
	ENSMUSG00000002963.17	Pnkp	0.227188	4.60768	3.27868	0.0893934	1	575	868	782	756	521	711
	ENSMUSG00000002968.9	Med25	0.110427	5.23848	0.833286	0.375151	1	911	1409	1281	1203	762	1012
	ENSMUSG00000002980.14	Bcam	0.0284918	3.98346	0.0344244	0.855186	1	568	485	473	404	327	466
	ENSMUSG00000002981.10	Clptm1	0.171698	6.68576	3.30922	0.0880461	1	2771	3531	3267	3191	2135	2948
	ENSMUSG00000002983.17	Relb	0.0684764	7.18002	0.315821	0.582385	1	5202	4463	4177	4148	2907	4189
	ENSMUSG00000002984.17	Tomm40	0.140095	5.76109	1.91887	0.185379	1	1603.83	1768	1706	1770.39	1059.07	1508.33
	ENSMUSG00000002985.16	Apoe	-0.146421	9.62829	1.39454	0.255249	1	28128	28469	25106	20306	14002	22774
	ENSMUSG00000002992.17	Apoc2	-0.0116085	0.368965	0.00149378	0.969658	1	42	47	32	28	23	41
	ENSMUSG00000002997.15	Prkar2b	-0.30963	4.83657	1.54886	0.256197	1	758	1118	1253	999	458	510
	ENSMUSG00000003032.8	Klf4	-0.371907	3.903	6.85361	0.0188787	1	577	565	506	414	262	309
	ENSMUSG00000003033.15	Ap1m1	0.133778	6.17075	1.90743	0.186622	1	1957	2498	2333	2260	1446	2025
	ENSMUSG00000003037.16	Rab8a	-0.0489688	7.04113	0.276718	0.606224	1	4052	4790	4369	3685	2525	3605
	ENSMUSG00000003038.15	Hmgn2	-0.126359	7.12822	1.52774	0.234654	1	4028.74	5043.2	5352.92	4076.34	2554.57	3553.74
	ENSMUSG00000003039.9	Fam32a	-0.024055	6.14978	0.0625241	0.805798	1	2073	2554	2439	2014	1482	1807
	ENSMUSG00000003051.13	Elf3	0.392643	0.259019	0.100692	0.765723	1	24	30	43	1	13.21	83.53
	ENSMUSG00000003053.17	Cyp2c29	0	-3.86144	0	1	1	0	0	0	0	0	0
	ENSMUSG00000003062.13	Stard3nl	0.163576	4.73819	1.83319	0.194952	1	732	938	814	717	590	807
	ENSMUSG00000003068.16	Stk11	0.02824	6.75825	0.0754403	0.787161	1	2837.38	4012.18	3770.76	3245.7	2175.14	2865.22
	ENSMUSG00000003070.6	Efna2	0.207087	-0.350565	0.26426	0.614379	1	13	35	19	19	23	15
	ENSMUSG00000003072.15	Atp5d	0.0470759	6.5016	0.207124	0.655271	1	2658	3139	2993	2529	1721	2744
	ENSMUSG00000003099.11	Ppp5c	0.129309	6.27378	1.6479	0.217897	1	2040	2773	2501	2250	1710	2121
	ENSMUSG00000003119.14	Cdk12	-0.0244731	6.35886	0.034068	0.856347	1	2135.96	3242.99	2834	2401.99	1895.97	1783
	ENSMUSG00000003123.15	Lipe	0.0707367	5.59864	0.412375	0.530047	1	1558.47	1685.93	1402.99	1579.21	954.04	1247.2
	ENSMUSG00000003131.7	Pafah1b2	-0.141042	6.25591	2.16776	0.160725	1	2549	2856	2486	2139	1446	1921
	ENSMUSG00000003134.10	Tbc1d8	-0.00884832	6.36951	0.00627291	0.937874	1	2910.26	2746.02	2471.42	2573.49	1603.21	2093.44
	ENSMUSG00000003135.15	Cnot11	-0.08323	4.90018	0.477817	0.499523	1	1072	978	954	865	588	738
	ENSMUSG00000003153.10	Slc2a3	-0.113288	5.17914	0.838846	0.373603	1	1314	1238	1134	1139	654	863
	ENSMUSG00000003154.15	Foxj2	-0.163834	5.44351	2.3821	0.142678	1	1492.86	1647.94	1380.76	1183.9	858.9	1048.96
	ENSMUSG00000003161.15	Sri	-0.139086	6.37032	1.65367	0.217132	1	3014	2803	2678	2311	1519	2149
	ENSMUSG00000003166.20	Dgcr2	0.0405161	6.37634	0.149148	0.704542	1	2231.27	3087.82	2790.72	2680.08	1647.06	2083.53
	ENSMUSG00000003184.15	Irf3	0.263195	6.31017	5.36942	0.0343719	1	1840	2831	2490	2377	1729	2435
	ENSMUSG00000003190.12	Bcl2l12	0.48173	3.35191	6.36148	0.0230571	1	179.08	375.36	293.47	329.95	236.52	329.6
	ENSMUSG00000003198.10	Zfp959	0.159856	3.6522	1.13029	0.303818	1	296.79	472.26	405.58	386.26	273.97	337.46
	ENSMUSG00000003199.16	Mpnd	0.118412	4.76163	0.798831	0.38496	1	908	843	794	752	533	852
	ENSMUSG00000003200.10	Sh3gl1	0.0144351	6.38328	0.0154247	0.902739	1	2941	2617	2570	2302	1635	2413
	ENSMUSG00000003206.7	Ebi3	0.202265	4.57218	1.74348	0.207173	1	853.28	687.18	614.63	695.01	506.59	718.04
	ENSMUSG00000003208.9	Yju2	-0.119675	3.7395	0.596443	0.451426	1	508.2	419.38	425.12	357.09	250.14	357.4
	ENSMUSG00000003227.4	Edar	-0.264248	-0.0249472	0.411849	0.531175	1	50	23	23	34	12	18
	ENSMUSG00000003228.9	Grk5	0.1877	4.87356	2.69894	0.12032	1	859.2	942.16	892.77	830.87	689.59	812.94
	ENSMUSG00000003233.12	Dvl3	-0.0188874	5.17504	0.0307607	0.863021	1	1023	1364	1206	1113	692	923
	ENSMUSG00000003234.16	Abcf3	0.315153	4.8808	6.46173	0.0220003	1	673	1028	902	970	607	909
	ENSMUSG00000003235.13	Eif2b5	0.105721	5.63003	1.14188	0.301436	1	1428	1727	1550	1438	1036	1402
	ENSMUSG00000003269.17	Cyth2	0.0590737	4.7847	0.281232	0.603327	1	789.92	997.8	875.06	845.84	527.84	764.91
	ENSMUSG00000003271.17	Sult2b1	-0.240863	-0.584479	0.429524	0.521726	1	21	26	16.65	17	13	11
	ENSMUSG00000003273.14	Car11	-0.167036	-1.83308	0.0817849	0.778638	1	7	8	7	3	3	9
	ENSMUSG00000003279.17	Dlgap1	-0.41102	-1.59407	0.648744	0.432611	1	12	9	8	8	3	6
	ENSMUSG00000003282.9	Plag1	-0.87748	-0.449233	3.95079	0.0646086	1	41	19	22	12	14	8
	ENSMUSG00000003283.14	Hck	0.235205	7.89504	4.54764	0.0491447	1	7431	7116	6907	7155	4892	7496
	ENSMUSG00000003299.10	Mrpl4	0.0187369	5.13503	0.0251498	0.87602	1	1210	1110	1096	1006	680	994
	ENSMUSG00000003308.15	Keap1	0.077952	7.09081	0.680256	0.421873	1	3776.71	4930.46	4410.16	4086.41	2725.49	3813.7
	ENSMUSG00000003309.14	Ap1m2	0.294525	0.65833	0.999624	0.332586	1	47	45	42	34	32	60
	ENSMUSG00000003316.14	Glg1	0.0397298	6.47822	0.0847387	0.775756	1	2352	3311	3046	2847	2065	1872
	ENSMUSG00000003341.9	Atp8b3	0.807347	-2.85856	0.792022	0.386944	1	2	2	1	4	2	1
	ENSMUSG00000003344.14	Btbd2	0.254841	4.43152	3.04202	0.100708	1	479	771	701	640	541	568
	ENSMUSG00000003345.16	Csnk1g2	-0.0205397	6.71674	0.0419059	0.840434	1	2908	4085	3501	2938	2111	2841
	ENSMUSG00000003346.14	Abhd17a	0.301905	5.49515	7.1594	0.0167935	1	1049	1529	1425	1408	992	1366
	ENSMUSG00000003348.10	Mob3a	0.202427	6.51037	3.7993	0.0694001	1	2276	3229	2895	2690	2049	2602
	ENSMUSG00000003352.14	Cacnb3	0.35361	6.50734	7.44226	0.0164905	1	1942	3290	2718	2719	2246	2676
	ENSMUSG00000003354.6	Ccdc65	-0.498017	-3.53951	0.0961404	0.760596	1	1	0	1	0	0	1
	ENSMUSG00000003355.7	Fkbp11	0.116998	2.45061	0.0740319	0.794387	1	163	135	210	81	108	231
	ENSMUSG00000003360.15	Ddx23	-0.0118987	6.84685	0.0163855	0.899772	1	3597	4061	3728	3442	2324	2914
	ENSMUSG00000003363.15	Pld3	0.0380862	6.6172	0.0971543	0.759486	1	3004	3346	3189	2398	1948	3149
	ENSMUSG00000003378.9	Grik5	-0.168182	2.20463	0.741634	0.402119	1	139	174	161	138	72	118
	ENSMUSG00000003379.7	Cd79a	0.220041	8.61589	3.16835	0.0944683	1	13111.5	11597.9	10769.6	11689.6	8218.13	12084.8
	ENSMUSG00000003380.11	Rabac1	0.0405301	5.70519	0.101764	0.753967	1	1595	1843	1629	1357	947	1715
	ENSMUSG00000003382.18	Etv3	-0.362823	7.80786	2.40389	0.171762	1	10639	7151	6682.95	6064.95	3892	4933.94
	ENSMUSG00000003402.14	Prkcsh	0.107909	5.81574	1.1548	0.29881	1	1573	1957	1822	1611	1156	1650
	ENSMUSG00000003410.8	Elavl3	0.841766	-3.3567	0.445292	0.514284	1	1	1	0	1	1	1
	ENSMUSG00000003411.10	Rab3b	0.519462	-2.48884	0.522085	0.480596	1	2	3	4	4	3	3
	ENSMUSG00000003420.8	Fcgrt	-0.112189	4.50318	0.658447	0.429259	1	807	775	723	626	374	663
	ENSMUSG00000003421.13	Nosip	0.092286	5.35038	0.607128	0.447476	1	1025	1569	1323	1290	778	1142
	ENSMUSG00000003423.15	Pih1d1	0.253093	4.41183	4.4757	0.0507585	1	586.92	680.86	643.11	724.15	426.61	613.49
	ENSMUSG00000003429.11	Rps11	0.136772	9.12275	1.1698	0.295802	1	18307.5	15556.8	18098.7	16422.5	11095.6	16839
	ENSMUSG00000003435.9	Supt5	0.0535189	7.06005	0.304392	0.588922	1	3740.12	4769.73	4433.87	3935.56	2920.02	3372
	ENSMUSG00000003436.11	Dll3	-3.02522	-3.54059	2.36519	0.146881	1	2	0	1	0	0	0
	ENSMUSG00000003437.14	Paf1	0.15104	5.5812	2.24261	0.15412	1	1311	1680	1490	1412	1049	1333
	ENSMUSG00000003438.17	Timm50	0.099717	4.86387	0.768575	0.393896	1	780	999	995	906	565	820
	ENSMUSG00000003444.8	Med29	0.123887	3.52192	0.64779	0.432943	1	347	412	320	334	215	359
	ENSMUSG00000003452.15	Bicd1	-0.201552	0.899879	0.53218	0.476452	1	46	91	54	49	29	49
	ENSMUSG00000003458.12	Ncstn	-0.120155	6.71747	1.48196	0.241478	1	3164.65	3900.53	3757.27	3205.11	1907.21	2583.04
	ENSMUSG00000003464.13	Pex19	-0.0546656	5.13555	0.26486	0.613981	1	1078	1247	1201	1086	663	874
	ENSMUSG00000003469.9	Phyhip	-0.598983	1.70627	0.340209	0.589153	1	26	162	197	148	32	21
	ENSMUSG00000003476.16	Crhr2	1.26342	-3.26896	0.784449	0.389169	1	0	0	2	0	3	1
	ENSMUSG00000003477.5	Inmt	-0.398908	-2.16361	0.384197	0.544271	1	7	4	6	5	2	3
	ENSMUSG00000003484.4	Cyp4f18	-0.144123	4.19809	1.24164	0.281949	1	544.97	696.97	656	559	311.96	460
	ENSMUSG00000003500.13	Impdh1	0.0456917	5.10471	0.166667	0.688614	1	974	1287	1084	933	702	999
	ENSMUSG00000003505.15	Psg18	0	-3.86144	0	1	1	0	0	0	0	0	0
	ENSMUSG00000003518.13	Dusp3	0.0838268	4.68382	0.399531	0.536443	1	664	934	869	649	567	760
	ENSMUSG00000003526.12	Prodh	0.440642	2.80096	6.70935	0.0199646	1	164	221	196	218	157	228
	ENSMUSG00000003527.9	Ess2	-0.011379	4.72575	0.00971017	0.922752	1	864	853	886	770	512	714
	ENSMUSG00000003528.15	Slc25a1	0.0508872	5.23331	0.137561	0.715988	1	1358	1146	1104	1167	668	1094
	ENSMUSG00000003531.15	Dgcr6	0.136075	2.65637	0.641901	0.435	1	182	202	202	195	129	172
	ENSMUSG00000003534.17	Ddr1	0.248176	4.69859	4.06476	0.0612587	1	685	924.68	736	893	501.53	762
	ENSMUSG00000003541.6	Ier3	-0.589289	3.59186	1.67904	0.253502	1	733	305	342	290	162	281
	ENSMUSG00000003545.3	Fosb	-0.28577	1.58568	1.47547	0.242467	1	106	104	106	63	68	64
	ENSMUSG00000003546.10	Klc4	0.0916039	3.21305	0.256719	0.619436	1	202	358	328	281	205	230
	ENSMUSG00000003549.9	Ercc1	0.1681	3.50297	1.26121	0.278329	1	345	369	331.36	327.81	272	293
	ENSMUSG00000003555.8	Cyp17a1	0.794253	-2.85744	0.72489	0.407364	1	3	1	1	2	1	4
	ENSMUSG00000003559.8	As3mt	0.023336	3.26159	0.0215081	0.885273	1	294	330	307	241	195	287
	ENSMUSG00000003573.15	Homer3	0.159549	2.47875	0.652957	0.43115	1	128.54	220.06	169.74	175.47	127.03	135.83
	ENSMUSG00000003575.13	Crtc1	0.0665217	4.59898	0.275703	0.606879	1	649	876	813	820	480	587
	ENSMUSG00000003581.14	Rnf215	-0.0517188	4.34915	0.181952	0.675501	1	631	786	626	596	394	524
	ENSMUSG00000003585.13	Sec14l2	-0.445827	1.89799	0.273111	0.626667	1	35	163	224	149	58	32
	ENSMUSG00000003617.16	Cp	0.0880606	7.78297	0.723265	0.407879	1	6087	8231	6823	6377.76	4965.33	5692.33
	ENSMUSG00000003623.4	Crot	0.0375542	3.9816	0.0779408	0.783757	1	412	600.01	528.02	490	314	407.04
	ENSMUSG00000003644.17	Rps6ka1	0.0815937	5.87543	0.412312	0.530405	1	1391	2180.94	2090.77	1953.85	1173.62	1470
	ENSMUSG00000003657.9	Calb2	0.820184	-2.85321	0.637956	0.436387	1	4	1	0	2	3	2
	ENSMUSG00000003660.10	Snrnp200	0.0312191	7.44652	0.0882049	0.770371	1	4966	6101	5972	5459	3777	4071
	ENSMUSG00000003662.10	Ciao1	0.198626	4.85776	1.96713	0.180804	1	622	1069	992	857	632	846
	ENSMUSG00000003665.7	Has1	-0.366829	1.04643	1.31229	0.270404	1	108	59	50	52	38	41
	ENSMUSG00000003680.16	Taf6l	0.347532	3.14616	3.26558	0.0899785	1	167	313	292	307.97	206	232
	ENSMUSG00000003721.14	Insig2	0.0742861	4.1209	0.328827	0.574486	1	503	602	562	458	378	499
	ENSMUSG00000003731.13	Kpna6	-0.038652	6.2052	0.153426	0.700556	1	2178	2685	2517	2234	1507	1764
	ENSMUSG00000003752.9	Itpkc	-0.423035	4.44575	2.59166	0.153845	1	1089.96	662.56	657.26	531.34	343.46	537.26
	ENSMUSG00000003762.13	Coq8b	0.101831	4.19294	0.529805	0.477421	1	537.72	641.33	556.44	467.5	368.62	588.33
	ENSMUSG00000003778.14	Brd8	-0.0487029	6.07713	0.0855793	0.776363	1	1550	2754	2531	2106	1410	1499
	ENSMUSG00000003779.16	Kif20a	-0.234179	4.20779	0.310869	0.602693	1	329.09	789.43	872.89	645.52	334.23	316.69
	ENSMUSG00000003808.18	Farsa	-0.0905823	6.23269	0.674608	0.423766	1	2714	2430	2447	2172	1427	1928
	ENSMUSG00000003809.14	Gcdh	0.0359665	3.3637	0.0419018	0.840441	1	226	404	376	304	213	266
	ENSMUSG00000003810.12	Mast2	-0.0708102	4.96915	0.396956	0.537742	1	999	1112	1044	977	613	727
	ENSMUSG00000003812.13	Dnase2a	-0.0911729	4.82507	0.440012	0.516754	1	688.92	1136.26	1076	760.52	576.99	724.8
	ENSMUSG00000003813.15	Rad23a	-0.270162	6.4772	0.449202	0.53664	1	1496.47	4250.93	4038.26	2673.96	1596.94	1880.03
	ENSMUSG00000003814.8	Calr	0.168528	8.31634	2.35108	0.14513	1	9774	9929	9796	8676	7204	9420
	ENSMUSG00000003824.12	Syce2	0.0884507	2.70202	0.204395	0.65739	1	163	237	219	241	122	147
	ENSMUSG00000003847.16	Nfat5	-0.0899943	6.45012	0.819508	0.379028	1	2803	3275	2809	2465	1831	2074
	ENSMUSG00000003848.14	Nob1	0.0908771	5.48286	0.74103	0.402307	1	1426	1472	1355	1329	890	1279
	ENSMUSG00000003849.8	Nqo1	-0.440392	1.51216	1.38243	0.268569	1	77	104	134	112	26	48
	ENSMUSG00000003863.18	Ppfia3	0.928382	-1.82036	2.72913	0.118419	1	3	5	7	6	6	10
	ENSMUSG00000003865.16	Gys1	0.100703	3.39314	0.413474	0.529506	1	286.32	366.78	343.29	302.32	191.09	331.15
	ENSMUSG00000003868.14	Ruvbl2	0.196672	5.42541	3.75637	0.0708332	1	1141.68	1456.22	1356.71	1333.68	933.91	1199.85
	ENSMUSG00000003872.9	Lin7b	-1.63639	-2.65085	2.87629	0.109659	1	6.86	3	3	2	1	0
	ENSMUSG00000003873.11	Bax	0.13305	6.01138	1.59961	0.22444	1	1744	2342	2001	1849	1298	1965
	ENSMUSG00000003923.14	Tfam	0.0189807	5.8829	0.0385317	0.846902	1	1839	2025	1904	1690	1188	1613
	ENSMUSG00000003929.11	Zfp81	0.0381435	3.50417	0.0579702	0.812854	1	286	419	399	344	253	263
	ENSMUSG00000003934.5	Efnb3	0.10672	0.648554	0.137375	0.715866	1	30	61	53	41	29	48
	ENSMUSG00000003948.17	Mmd	-0.225899	4.25574	3.00256	0.102757	1	698.18	707.67	610.07	548.29	346.62	438.44
	ENSMUSG00000003949.16	Hlf	-0.43091	-0.237437	1.47508	0.242527	1	34	26	27	18	18	13
	ENSMUSG00000003955.8	Fam162a	0.18338	3.94439	2.08379	0.168558	1	411.83	524	484	477.86	326	432
	ENSMUSG00000003970.9	Rpl8	-0.0923773	9.86291	0.590545	0.453631	1	32260	31799	30307	24990	16802	26755
	ENSMUSG00000003974.6	Grm3	0	-3.86144	0	1	1	0	0	0	0	0	0
	ENSMUSG00000003992.15	Ssbp2	-0.34675	3.59259	2.93397	0.111516	1	301.37	566.34	470.49	375.12	212.54	217.03
	ENSMUSG00000004018.9	Fancl	0.052304	3.01917	0.09966	0.756402	1	208.01	283.97	289.67	246.84	157.9	217.78
	ENSMUSG00000004031.13	Brinp2	-0.00477978	-0.826592	0.000134741	0.990885	1	13	22	14	17	6	15
	ENSMUSG00000004032.10	Gstm5	-0.382398	2.82525	1.43133	0.265411	1	158.96	253.9	373.84	239.79	107.89	121.98
	ENSMUSG00000004035.12	Gstm7	0.500465	-1.57906	0.972592	0.339014	1	8	7	7	6	6	12
	ENSMUSG00000004038.9	Gstm3	0	-3.86144	0	1	1	0	0	0	0	0	0
	ENSMUSG00000004040.16	Stat3	-0.0329718	8.85307	0.066513	0.799839	1	17362	14662	13696	13319	8989	12370
	ENSMUSG00000004043.14	Stat5a	-0.136692	5.96756	1.28682	0.273685	1	2355.36	2027.57	2023.16	1855.23	1105.24	1588.25
	ENSMUSG00000004044.9	Cavin1	0.167675	4.98321	2.36646	0.143908	1	978	1021	926	969	662	901
	ENSMUSG00000004054.9	Map3k11	0.0915109	6.25874	0.732206	0.40506	1	1946.6	2915.79	2492.96	2249.7	1597.32	2123
	ENSMUSG00000004056.15	Akt2	-0.126826	6.85662	1.39437	0.255276	1	4137.99	3905.14	3817.47	3314.61	2048.68	3085.72
	ENSMUSG00000004070.15	Hmox2	0.139404	6.27995	1.81808	0.196703	1	2441.8	2473.1	2347.85	2237.01	1598.49	2327.12
	ENSMUSG00000004071.13	Cdip1	0.18262	5.43788	3.27922	0.0893693	1	1232.45	1422.55	1344.65	1349.36	882.86	1266.93
	ENSMUSG00000004085.14	Map3k20	-0.218727	3.6883	1.63606	0.219479	1	336	508	524	419	212	280
	ENSMUSG00000004096.9	Cwc15	-0.118506	5.56481	1.19931	0.290003	1	1642	1630	1561	1231	933	1253
	ENSMUSG00000004098.7	Col5a3	0.770053	0.544442	6.27718	0.0236733	1	30	27	45	67	29	41
	ENSMUSG00000004099.16	Dnmt1	0.0350247	6.58635	0.0190261	0.895187	1	2063	3610	3775	3513	1914	2012
	ENSMUSG00000004100.12	Ppan	0.00975449	6.94233	0.00787261	0.930422	1	4275.11	3992.47	3744.48	3381.31	2457.93	3487
	ENSMUSG00000004105.8	Angptl2	-0.593269	3.1738	4.25957	0.0711514	1	485	246	307	229	144	168
	ENSMUSG00000004110.17	Cacna1e	-0.408865	4.56255	2.51583	0.159196	1	1152	692	759	517	414	592
	ENSMUSG00000004113.18	Cacna1b	0.188793	-0.370185	0.298201	0.5927	1	26	22	17	20	16	21
	ENSMUSG00000004127.12	Trmt10a	0.0746395	3.33986	0.253256	0.621789	1	296.87	344.9	324.9	316	215.66	249
	ENSMUSG00000004151.17	Etv1	-0.635248	-0.257064	3.68294	0.0733662	1	27.91	32.37	30.46	19.32	9	17
	ENSMUSG00000004187.11	Kifc2	0.0209624	0.641933	0.0065763	0.936393	1	47	55.22	44	41	31.41	41.01
	ENSMUSG00000004207.14	Psap	0.0350564	10.395	0.0938428	0.763379	1	39941	47000	44313	36005	27318	39551
	ENSMUSG00000004221.16	Ikbkg	-0.0590602	5.68026	0.335144	0.570871	1	1457.81	1931.47	1782.52	1447	1048	1290.33
	ENSMUSG00000004231.15	Pax2	-1.00513	-3.44805	0.423554	0.524595	1	1	0	2	1	0	0
	ENSMUSG00000004233.14	Wars2	0.271959	3.61768	3.57255	0.0773784	1	326	408	360	408	290	310
	ENSMUSG00000004263.15	Atn1	0.176944	5.5595	2.59306	0.127283	1	1287	1652.73	1432.7	1351	1132	1254
	ENSMUSG00000004264.17	Phb2	0.0995783	6.92518	1.08665	0.313026	1	3687.1	3928.87	3927.31	3760.53	2389	3418.91
	ENSMUSG00000004267.16	Eno2	0.500708	2.19003	3.67259	0.0761193	1	72	177	126	133	133	126
	ENSMUSG00000004268.11	Emg1	0.100252	6.37749	1.10733	0.308615	1	2395.53	2873.86	2647.73	2412.66	1693.36	2406.04
	ENSMUSG00000004270.13	Lpcat3	-0.295147	5.32311	4.39466	0.0549229	1	1078.47	1687.14	1609.27	1230.34	650.64	874.96
	ENSMUSG00000004285.12	Atp6v1f	0.073727	6.0635	0.348149	0.563869	1	2299.89	2123.75	1958.9	1852.82	1261.98	2095.9
	ENSMUSG00000004296.14	Il12b	0.0742086	2.1648	0.126309	0.727028	1	159	131	131	140	79	128
	ENSMUSG00000004317.14	Clcn5	-0.291178	4.36905	2.85604	0.115907	1	885	655	668	593	389	420
	ENSMUSG00000004319.15	Clcn3	-0.584832	6.24833	7.87235	0.0270175	1	1890.01	3769.01	3444	1912	1251	1442
	ENSMUSG00000004328.15	Hif3a	0.00151706	2.75168	5.61602e-05	0.994115	1	174	244	242	244	132	134
	ENSMUSG00000004341.8	Gpx6	-2.52112	-3.64002	1.66901	0.217799	1	1	0	1	0	0	0
	ENSMUSG00000004344.12	Gpx5	0	-3.86144	0	1	1	0	0	0	0	0	0
	ENSMUSG00000004347.17	Pde1c	-0.208264	-0.874994	0.231605	0.636985	1	19	17	14	7	9	17
	ENSMUSG00000004356.8	Utp20	0.169171	6.03568	2.78844	0.114791	1	1750	2259	2094	2025	1499	1699
	ENSMUSG00000004360.9	9330159F19Rik	0.162418	-2.55573	0.0406518	0.842805	1	1	5	3.49	5	1	2.27
	ENSMUSG00000004364.14	Cul3	-0.233779	6.54794	4.36147	0.0534502	1	3602	3282	3017	2519	1744	2241
	ENSMUSG00000004366.4	Sst	3.63187	-1.8378	3.93142	0.100111	1	1	1	1	1	0	32
	ENSMUSG00000004371.15	Il11	0.968867	-2.43705	1.23174	0.283805	1	0	2	6	3	5	4
	ENSMUSG00000004383.18	Large1	-0.0562093	2.68224	0.0826308	0.777529	1	241	185	206	177	114	183
	ENSMUSG00000004393.10	Ddx56	0.120306	5.13799	1.24331	0.281637	1	1070	1176	1072	1061	687	1039
	ENSMUSG00000004394.12	Tmed4	-0.0513474	4.93864	0.229573	0.638456	1	961	1121	990	841	630	794
	ENSMUSG00000004415.15	Col26a1	-2.51477	-3.64076	1.47422	0.245233	1	0	0	2	0	0	0
	ENSMUSG00000004446.12	Bid	0.107131	5.80501	1.1093	0.308199	1	1578	1880	1850	1590	1141.61	1652.31
	ENSMUSG00000004451.14	Ralb	-0.0297179	4.9565	0.0639797	0.8036	1	1033	1055	989	822	597	902
	ENSMUSG00000004455.16	Ppp1cc	-0.073151	7.57817	0.608858	0.446842	1	5967.24	6787.11	6556.92	5546.21	3599.91	5010.54
	ENSMUSG00000004460.17	Dnajb11	0.00234347	6.31922	0.00057673	0.981144	1	2272	2921	2691	2210	1683	2119
	ENSMUSG00000004462.7	Tbccd1	0.122368	3.92926	0.257725	0.624886	1	275	587	590	518	318	367
	ENSMUSG00000004473.10	Clec11a	-0.275873	1.3121	0.96156	0.341688	1	105	75	77	57	32	78
	ENSMUSG00000004500.9	Zfp324	0.159911	3.09724	0.54601	0.47238	1	161	339	302	291	190	198
	ENSMUSG00000004508.6	Gab2	-0.258245	5.58855	3.97012	0.0644055	1	1954	1669	1495	1332	852	1143
	ENSMUSG00000004530.12	Coro1c	0.0519289	6.41357	0.312994	0.583755	1	2515	3028	2716	2514	1739	2314.22
	ENSMUSG00000004535.12	Tax1bp1	-0.199598	7.9099	3.77136	0.0703289	1	8654.07	8747.61	7855.4	6693.83	4367.83	5946.63
	ENSMUSG00000004540.7	Psg17	-0.431695	-2.92851	0.15394	0.700081	1	2	3	2	4	0	0
	ENSMUSG00000004542.15	Psg19	-3.0197	-3.54127	2.37364	0.146215	1	2	1	0	0	0	0
	ENSMUSG00000004552.16	Ctse	-0.990324	6.54839	1.65541	0.264417	1	1215	5505	5854	2921	1145	815
	ENSMUSG00000004558.15	Ndrg2	-0.0557522	3.31244	0.0942879	0.762837	1	354	372	263	269	232	220
	ENSMUSG00000004561.14	Mettl17	-0.0111396	4.79124	0.00984119	0.922235	1	888	999.52	845	786	574	716
	ENSMUSG00000004562.16	Arhgef40	0.351032	4.77509	6.2857	0.0235929	1	592.12	980.99	816.92	880.7	694.94	720.15
	ENSMUSG00000004565.15	Pnpla6	0.136465	4.90425	0.420668	0.535073	1	622	1196	1024	919	750	666
	ENSMUSG00000004567.16	Mcoln1	0.0881958	5.05757	0.577222	0.458678	1	896	1130	1159	1010	750	817
	ENSMUSG00000004568.13	Arhgef18	0.0942216	7.04171	0.268362	0.618734	1	2782	5260	4674	4366	2787	3169
	ENSMUSG00000004610.4	Etfb	0.0339967	4.69602	0.0717483	0.792301	1	846	835	829	796	452	758
	ENSMUSG00000004612.9	Nkg7	0.154439	4.81405	1.69361	0.211929	1	817	865	933	820	559	867
	ENSMUSG00000004626.14	Stxbp2	0.015075	6.2176	0.0253178	0.87561	1	2162	2702	2446	2242.75	1453	1986
	ENSMUSG00000004630.18	Pcp2	0.821014	-2.66171	0.754432	0.398181	1	1.6	1.6	3.26	5.73	3.29	0
	ENSMUSG00000004631.15	Sgce	-0.233597	2.44121	1.14412	0.300978	1	224	159	181	172	88	118
	ENSMUSG00000004633.17	Chn2	-0.245488	2.20971	1.33168	0.265798	1	167.68	146.58	169.18	146.76	67.69	106.92
	ENSMUSG00000004637.15	Wwox	-0.211125	2.85423	1.56419	0.2294	1	261	255	238	198	132	173
	ENSMUSG00000004642.13	Slbp	-0.274417	6.23314	1.40175	0.280738	1	1757.96	3259.78	3188.08	2408.1	1288.61	1519.81
	ENSMUSG00000004651.6	Tyr	2.04384	-3.74315	1.17016	0.298074	1	0	0	0	0	1	0
	ENSMUSG00000004654.6	Ghrhr	-0.173087	-3.36237	0.0144119	0.905969	1	0	3	0	1	0	1
	ENSMUSG00000004655.5	Aqp1	-0.717653	6.89811	0.96608	0.378711	1	1611	6348	6997	4232	1610	1201
	ENSMUSG00000004661.15	Arid3b	0.150434	5.00076	1.32856	0.266337	1	787.33	1141.63	1075.17	1009.44	759.63	755
	ENSMUSG00000004667.18	Polr2e	0.121456	5.55325	1.28753	0.273557	1	1275	1671	1499	1373	923	1418
	ENSMUSG00000004668.14	Abca13	-0.277288	0.29322	0.888861	0.360091	1	32	48	45	31	25	22
	ENSMUSG00000004677.17	Myo9b	0.0080288	6.96315	0.00616614	0.938404	1	3470	4724	4123.69	3841	2620	2996
	ENSMUSG00000004698.10	Hdac9	-0.246763	4.31684	3.14489	0.0955911	1	771	740	603	567	353	462
	ENSMUSG00000004707.14	Ly9	0.15066	6.85824	2.2	0.157838	1	3154	3980	3731	3190	2627	3334
	ENSMUSG00000004709.14	Cd244a	0.313194	5.10462	5.1087	0.039244	1	794	1111	1131	939	745	1189
	ENSMUSG00000004730.15	Adgre1	0.242004	6.51372	4.50029	0.0501999	1	2342	3107	2833	2430	2190	2769
	ENSMUSG00000004748.5	Mtfp1	0.537625	1.50586	4.04501	0.0618243	1	43	89	95	90	78	79
	ENSMUSG00000004768.14	Rab23	0.212674	2.60627	1.48356	0.241236	1	159	215	179	181	136	171
	ENSMUSG00000004771.12	Rab11a	-0.0495467	5.90283	0.24401	0.628175	1	1898.85	2130	1962	1672.61	1112.92	1679.53
	ENSMUSG00000004788.11	Eif2b2	-0.00499235	5.19129	0.00207048	0.964281	1	1117	1344	1146	1054	670	1051
	ENSMUSG00000004789.10	Dlst	-0.127565	7.07104	1.70052	0.211045	1	4499	4630	4670	4006	2483	3295
	ENSMUSG00000004791.7	Pgf	-0.0849166	0.906835	0.0554625	0.817713	1	68	57	57	27	30	75
	ENSMUSG00000004798.14	Ulk2	0.0114043	4.25526	0.00813136	0.929291	1	550	688	635	527	429	475
	ENSMUSG00000004814.10	Ccl24	0.421679	0.339616	1.53452	0.233666	1	44	23	33	52	20	35
	ENSMUSG00000004815.12	Dgkq	0.121608	4.29611	0.71065	0.411907	1	471	745.14	648.01	590.98	463.34	475.42
	ENSMUSG00000004821.1	Tmed11	0.190817	1.17598	0.0353441	0.859364	1	45.98	77	80.99	6	41	126.98
	ENSMUSG00000004837.2	Grap	0.0591579	6.38902	0.359573	0.557313	1	2371	3066	2677	2370	1681	2421
	ENSMUSG00000004842.18	Pou1f1	-1.00513	-3.44805	0.423554	0.524595	1	1	0	2	1	0	0
	ENSMUSG00000004843.7	Chmp2b	-0.306185	4.99129	6.89083	0.0186097	1	1169	1226	1056	862	516	790
	ENSMUSG00000004849.14	Ap1s1	0.104056	5.09117	0.899968	0.357188	1	943	1231	1071	996	671	1011
	ENSMUSG00000004864.13	Mapk13	-0.0105678	0.996702	0.000752026	0.978634	1	62	61	67	31	27	88
	ENSMUSG00000004865.16	Srpk1	0.103625	6.60827	0.942043	0.346492	1	2452	3518	3352	3033	2066	2548
	ENSMUSG00000004872.15	Pax3	0.281921	-3.63962	0.0259016	0.874197	1	0	1	0	0	0	1
	ENSMUSG00000004880.11	Lbr	-0.253813	6.90065	2.42922	0.15282	1	3152.02	4938.52	4816.28	3758.14	2206.06	2336.78
	ENSMUSG00000004885.5	Crabp2	-0.05653	-1.56677	0.0125717	0.912149	1	9	12	6	7	4	9
	ENSMUSG00000004891.16	Nes	-0.0177588	2.83501	0.00998293	0.921679	1	177	276	253	213	132	190
	ENSMUSG00000004892.13	Bcan	-1.74118	-3.74751	0.816	0.381989	1	0	1	0	0	0	0
	ENSMUSG00000004894.10	Hapln2	0	-3.86144	0	1	1	0	0	0	0	0	0
	ENSMUSG00000004895.9	Prcc	0.0376656	5.21987	0.131409	0.721816	1	1075	1318	1234	1153	719	999
	ENSMUSG00000004896.16	Rrnad1	0.0261495	5.44298	0.0668313	0.799371	1	1241.6	1548.14	1463.58	1244.02	898.73	1168.02
	ENSMUSG00000004897.16	Hdgf	0.028881	7.51363	0.0745275	0.788419	1	4910	6454	6532	5843	3491	4752
	ENSMUSG00000004902.7	Slc25a18	-0.682168	-0.661792	3.19362	0.093276	1	27	23	17	11	9	12
	ENSMUSG00000004929.12	Thop1	0.268817	4.34444	4.09593	0.0603784	1	480	675	666	586	470	608
	ENSMUSG00000004931.11	Apba3	0.132418	4.20497	0.976547	0.338062	1	455	701	586	537	389	527
	ENSMUSG00000004933.17	Matk	0.0864103	2.53597	0.188741	0.669887	1	206	166	172	149	124	171
	ENSMUSG00000004934.14	Pias4	0.0881354	4.76012	0.43922	0.517126	1	642	1048	917	830	522	771
	ENSMUSG00000004936.8	Map2k1	-0.0869494	7.55485	0.827643	0.376732	1	6228	6812	6028	5347	3657	4808
	ENSMUSG00000004937.6	Sgta	0.175834	5.55467	2.8749	0.109738	1	1267	1654	1441	1476	935	1383
	ENSMUSG00000004939.7	Nmrk2	0	-3.86144	0	1	1	0	0	0	0	0	0
	ENSMUSG00000004945.15	Tmem242	0.0225486	4.40089	0.0339049	0.85627	1	679	704	672	593	409	608
	ENSMUSG00000004947.15	Dtx2	0.124407	5.26191	1.01824	0.328261	1	924	1478	1243	1102	798	1122
	ENSMUSG00000004948.12	Zp3	0.843087	-3.35911	0.308949	0.586173	1	0	2	0	0	0	3
	ENSMUSG00000004951.10	Hspb1	-0.146482	6.01318	0.127252	0.737948	1	3221.19	1661.91	1651.67	1646.87	1039.26	1996.52
	ENSMUSG00000004952.13	Rasa4	-0.0219693	8.22835	0.0372195	0.849496	1	10569.9	9906.99	9148.96	8799.97	5536.96	8348.95
	ENSMUSG00000004961.7	Syt5	-0.923532	-2.74977	0.956352	0.34296	1	5	2	3	2	0	2
	ENSMUSG00000004980.16	Hnrnpa2b1	0.00952536	9.36019	0.00695299	0.934601	1	17739	25321	21896	19089	14255	16262
	ENSMUSG00000004988.9	Fxyd4	-0.913718	-2.74878	0.880493	0.362301	1	5	2	3	3	1	0
	ENSMUSG00000004994.12	Ccdc130	0.185657	3.25093	1.47705	0.242225	1	253	307	314	295	190	281
[truncated: 53,753 more rows]

## Sheet: d Speen DEGs n=4
Gene list from c with q<0.05 filter. n=4 DEGs	GeneID	logFC	logCPM	F	PValue	FDR	C57Spleen1	C57Spleen2	C57Spleen3	S211ASpleen1	S211ASpleen2	S211ASpleen3
[truncated: 4 more rows]

[truncated: 5 more sheets: e Feet down DEGs Cytoscape, f IPA Dis&Func for 199 DEGs, g IPA USRs for 199 DEGs, h Core enriched genes, i CHIKV PolyIC overlap]
