# Supplementary material for: Widespread discrepancy in Nnt genotypes and genetic backgrounds complicates granzyme A and other knockout mouse studies
Source: eLife. 2022 Feb 4;11:e70207. doi: 10.7554/eLife.70207 (PMC8816380; doi:10.7554/eLife.70207)
Supplement: Supplementary file 7. — Datasets for exact-match (31 mer) k-mer mining approach to identify full-length Nnt reads (6N background) in accessions listing C57BL/6J mice as the mouse strain. [file elife-70207-supp7.xlsx]

## Sheet: a 6J SRA runs with exons 2 & 9
		K mer mining (Supplementary Fig. 12a)
Bioproject	Run Accession	Nnt exon 2 reads	Nnt exon 9 reads	Attributes.key	Attributes.value
PRJDB10114	DRR235167	10	26	strain_sam	C57BL/6J
PRJDB10114	DRR235169	23	68	strain_sam	C57BL/6J
PRJDB10114	DRR235174	82	85	strain_sam	C57BL/6J
PRJDB10114	DRR235175	62	92	strain_sam	C57BL/6J
PRJDB10114	DRR235177	32	40	strain_sam	C57BL/6J
PRJDB10114	DRR235182	55	86	strain_sam	C57BL/6J
PRJDB10114	DRR235184	57	60	strain_sam	C57BL/6J
PRJDB10114	DRR235185	106	108	strain_sam	C57BL/6J
PRJDB10114	DRR235187	40	45	strain_sam	C57BL/6J
PRJDB10695	DRR252191	122	777	strain_sam	C57BL/6J
PRJDB5523	DRR087001	151	289	strain_sam	C57BL/6J
PRJDB7749	DRR163654	43	100	strain_sam	C57BL/6J
PRJEB2602	ERR038237	432	580	strainorline_sam	C57BL/6J
PRJEB2602	ERR038238	438	631	strainorline_sam	C57BL/6J
PRJEB2602	ERR038239	409	583	strainorline_sam	C57BL/6J
PRJEB2602	ERR038240	408	932	strainorline_sam	C57BL/6J
PRJEB2602	ERR038241	491	1022	strainorline_sam	C57BL/6J
PRJEB2602	ERR038242	521	1280	strainorline_sam	C57BL/6J
PRJEB2602	ERR038243	349	578	strainorline_sam	C57BL/6J
PRJEB2602	ERR038244	371	578	strainorline_sam	C57BL/6J
PRJEB2602	ERR038245	400	615	strainorline_sam	C57BL/6J
PRJEB2602	ERR038246	198	479	strainorline_sam	C57BL/6J
PRJEB2602	ERR038247	193	482	strainorline_sam	C57BL/6J
PRJEB2602	ERR038248	230	545	strainorline_sam	C57BL/6J
PRJEB27175	ERR2617643	17	28	strain_sam	C57BL/6J
PRJEB27175	ERR2617655	11	30	strain_sam	C57BL/6J
PRJEB28128	ERR2730405	31	31	strain_sam	C57BL/6J
PRJEB28128	ERR2730406	34	15	strain_sam	C57BL/6J
PRJEB28128	ERR2730410	35	47	strain_sam	C57BL/6J
PRJEB28128	ERR2730411	26	18	strain_sam	C57BL/6J
PRJEB28360	ERR2755774	41	56	strain_sam	C57BL/6J
PRJEB30085	ERR2983177	93	115	strain_sam	C57BL/6J
PRJEB30085	ERR2983178	100	159	strain_sam	C57BL/6J
PRJEB30085	ERR2983179	64	114	strain_sam	C57BL/6J
PRJEB30085	ERR2983180	85	132	strain_sam	C57BL/6J
PRJEB30085	ERR2983181	130	175	strain_sam	C57BL/6J
PRJEB31769	ERR3233427	39	35	strain_sam	C57BL/6J
PRJEB32450	ERR3310318	24	25	strain_sam	C57BL/6J
PRJEB32450	ERR3310319	54	50	strain_sam	C57BL/6J
PRJEB32450	ERR3310320	30	30	strain_sam	C57BL/6J
PRJEB32450	ERR3310322	121	62	strain_sam	C57BL/6J
PRJEB32450	ERR3310323	68	44	strain_sam	C57BL/6J
PRJEB32450	ERR3310324	28	44	strain_sam	C57BL/6J
PRJEB32450	ERR3310325	23	20	strain_sam	C57BL/6J
PRJEB32450	ERR3310326	43	22	strain_sam	C57BL/6J
PRJEB32450	ERR3310327	40	24	strain_sam	C57BL/6J
PRJEB32450	ERR3310328	18	18	strain_sam	C57BL/6J
PRJEB32450	ERR3310329	42	54	strain_sam	C57BL/6J
PRJEB32450	ERR3310331	14	15	strain_sam	C57BL/6J
PRJEB32450	ERR3310332	82	66	strain_sam	C57BL/6J
PRJEB32450	ERR3310333	88	69	strain_sam	C57BL/6J
PRJEB32450	ERR3310334	82	82	strain_sam	C57BL/6J
PRJEB32450	ERR3310335	16	14	strain_sam	C57BL/6J
PRJEB32450	ERR3310336	12	16	strain_sam	C57BL/6J
PRJEB32450	ERR3310337	23	22	strain_sam	C57BL/6J
PRJEB32450	ERR3310338	11	14	strain_sam	C57BL/6J
PRJEB32450	ERR3310341	101	96	strain_sam	C57BL/6J
PRJEB32450	ERR3310342	93	67	strain_sam	C57BL/6J
PRJEB32450	ERR3310343	103	80	strain_sam	C57BL/6J
PRJEB32450	ERR3310344	92	77	strain_sam	C57BL/6J
PRJEB32450	ERR3310345	86	67	strain_sam	C57BL/6J
PRJEB32450	ERR3310346	112	76	strain_sam	C57BL/6J
PRJEB32450	ERR3310347	59	26	strain_sam	C57BL/6J
PRJEB32450	ERR3310348	33	57	strain_sam	C57BL/6J
PRJEB32450	ERR3310349	42	56	strain_sam	C57BL/6J
PRJEB32450	ERR3310350	45	42	strain_sam	C57BL/6J
PRJEB32450	ERR3310351	203	146	strain_sam	C57BL/6J
PRJEB32450	ERR3310352	11	10	strain_sam	C57BL/6J
PRJEB32450	ERR3310353	50	58	strain_sam	C57BL/6J
PRJEB32450	ERR3310354	45	55	strain_sam	C57BL/6J
PRJEB32450	ERR3310355	48	71	strain_sam	C57BL/6J
PRJEB32450	ERR3310356	77	52	strain_sam	C57BL/6J
PRJEB32450	ERR3310357	48	65	strain_sam	C57BL/6J
PRJEB32450	ERR3310358	71	56	strain_sam	C57BL/6J
PRJEB32450	ERR3310359	54	49	strain_sam	C57BL/6J
PRJEB32450	ERR3310360	74	47	strain_sam	C57BL/6J
PRJEB32450	ERR3310361	50	40	strain_sam	C57BL/6J
PRJEB32450	ERR3310362	65	78	strain_sam	C57BL/6J
PRJEB32450	ERR3310363	95	134	strain_sam	C57BL/6J
PRJEB32450	ERR3310364	166	214	strain_sam	C57BL/6J
PRJEB32450	ERR3310366	156	144	strain_sam	C57BL/6J
PRJEB32450	ERR3310367	228	210	strain_sam	C57BL/6J
PRJEB32450	ERR3310368	177	110	strain_sam	C57BL/6J
PRJEB32450	ERR3310370	230	180	strain_sam	C57BL/6J
PRJEB32475	ERR3316224	60	108	strain_sam	C57BL/6J
PRJEB32475	ERR3316226	61	64	strain_sam	C57BL/6J
PRJEB32475	ERR3316227	10	12	strain_sam	C57BL/6J
PRJEB32475	ERR3316228	14	17	strain_sam	C57BL/6J
PRJEB32475	ERR3316234	39	69	strain_sam	C57BL/6J
PRJEB32475	ERR3316235	39	47	strain_sam	C57BL/6J
PRJEB32694	ERR3336353	10	12	strain_sam	C57BL/6J
PRJEB32950	ERR3365625	16	33	strain_sam	C57BL/6J
PRJEB32950	ERR3365647	59	81	strain_sam	C57BL/6J
PRJEB32950	ERR3365720	44	62	strain_sam	C57BL/6J
PRJEB32950	ERR3365721	38	51	strain_sam	C57BL/6J
PRJEB32950	ERR3365722	65	98	strain_sam	C57BL/6J
PRJEB32950	ERR3365736	16	25	strain_sam	C57BL/6J
PRJEB32950	ERR3365737	42	40	strain_sam	C57BL/6J
PRJEB32950	ERR3365760	45	59	strain_sam	C57BL/6J
PRJEB32950	ERR3365761	50	50	strain_sam	C57BL/6J
PRJEB32959	ERR3365990	35	55	strain_sam	C57BL/6J
PRJEB33451	ERR3427728	28	41	strain_sam	C57BL/6J
PRJEB33451	ERR3427729	51	33	strain_sam	C57BL/6J
PRJEB33451	ERR3427730	29	14	strain_sam	C57BL/6J
PRJEB33451	ERR3427731	39	21	strain_sam	C57BL/6J
PRJEB33451	ERR3427735	14	14	strain_sam	C57BL/6J
PRJEB33451	ERR3427736	31	19	strain_sam	C57BL/6J
PRJEB3376	ERR192340	42	19	strain_sam	C57BL/6J
PRJEB3376	ERR192341	24	21	strain_sam	C57BL/6J
PRJEB3376	ERR192342	40	15	strain_sam	C57BL/6J
PRJEB3376	ERR192343	34	18	strain_sam	C57BL/6J
PRJEB34414	ERR3519601	28	86	strain_sam	C57BL/6J
PRJEB34414	ERR3519602	36	77	strain_sam	C57BL/6J
PRJEB34414	ERR3519605	28	64	strain_sam	C57BL/6J
PRJNA169535	SRR517892	10	15	strain_sam	C57BL/6J
PRJNA169535	SRR517893	16	16	strain_sam	C57BL/6J
PRJNA196894	SRR826327	58	77	strain_sam	C57BL/6J
PRJNA214854	SRR950199	22	33	strain_background_sam_s_dpl381	C57BL/6J
PRJNA214854	SRR950200	43	30	strain_background_sam_s_dpl381	C57BL/6J
PRJNA214854	SRR950201	45	25	strain_background_sam_s_dpl381	C57BL/6J
PRJNA214854	SRR950202	31	14	strain_background_sam_s_dpl381	C57BL/6J
PRJNA214854	SRR950203	46	34	strain_background_sam_s_dpl381	C57BL/6J
PRJNA214854	SRR950204	42	50	strain_background_sam_s_dpl381	C57BL/6J
PRJNA214854	SRR950205	70	50	strain_background_sam_s_dpl381	C57BL/6J
PRJNA214854	SRR950206	56	63	strain_background_sam_s_dpl381	C57BL/6J
PRJNA214854	SRR950207	47	38	strain_background_sam_s_dpl381	C57BL/6J
PRJNA214854	SRR950208	34	39	strain_background_sam_s_dpl381	C57BL/6J
PRJNA214854	SRR950211	37	34	strain_background_sam_s_dpl381	C57BL/6J
PRJNA222596	SRR1269505	20	24	strain_sam	C57BL/6J
PRJNA222596	SRR1269506	22	20	strain_sam	C57BL/6J
PRJNA222596	SRR1269516	19	41	strain_sam	C57BL/6J
PRJNA222596	SRR3176683	31	31	strain_sam	C57BL/6J
PRJNA229411	SRR1033938	63	15	strain_sam	C57BL/6J
PRJNA229411	SRR1033939	22	21	strain_sam	C57BL/6J
PRJNA229411	SRR1033954	22	13	strain_sam	C57BL/6J
PRJNA236433	SRR1950609	25	75	strain_sam	C57BL/6J
PRJNA236433	SRR1950611	47	153	strain_sam	C57BL/6J
PRJNA236433	SRR1950613	32	70	strain_sam	C57BL/6J
PRJNA236433	SRR1950614	47	138	strain_sam	C57BL/6J
PRJNA236433	SRR1950616	45	202	strain_sam	C57BL/6J
PRJNA236433	SRR1950623	45	119	strain_sam	C57BL/6J
PRJNA240996	SRR1187092	268	372	strain_sam	C57BL/6J
PRJNA240996	SRR1187093	231	266	strain_sam	C57BL/6J
PRJNA240996	SRR1187094	293	37	strain_sam	C57BL/6J
PRJNA252674	SRR1391033	218	285	strain_sam	C57BL/6J
PRJNA252674	SRR1391034	137	190	strain_sam	C57BL/6J
PRJNA252674	SRR1391035	107	206	strain_sam	C57BL/6J
PRJNA252674	SRR1391036	105	192	strain_sam	C57BL/6J
PRJNA252674	SRR1391037	134	268	strain_sam	C57BL/6J
PRJNA252674	SRR1391038	177	288	strain_sam	C57BL/6J
PRJNA252674	SRR1391039	190	331	strain_sam	C57BL/6J
PRJNA252674	SRR1391053	268	372	strain_sam	C57BL/6J
PRJNA252674	SRR1391054	231	266	strain_sam	C57BL/6J
PRJNA252674	SRR1391055	293	37	strain_sam	C57BL/6J
PRJNA252674	SRR1391056	309	456	strain_sam	C57BL/6J
PRJNA252674	SRR1391057	292	308	strain_sam	C57BL/6J
PRJNA252674	SRR1391058	265	416	strain_sam	C57BL/6J
PRJNA252674	SRR1391059	364	431	strain_sam	C57BL/6J
PRJNA259419	SRR1557248	42	63	strain_sam	C57BL/6J
PRJNA259419	SRR1557249	38	51	strain_sam	C57BL/6J
PRJNA259419	SRR1557250	49	79	strain_sam	C57BL/6J
PRJNA259419	SRR1557251	36	48	strain_sam	C57BL/6J
PRJNA259419	SRR1557252	33	34	strain_sam	C57BL/6J
PRJNA259419	SRR1557253	38	42	strain_sam	C57BL/6J
PRJNA259419	SRR1557254	46	50	strain_sam	C57BL/6J
PRJNA259419	SRR1557255	59	52	strain_sam	C57BL/6J
PRJNA259419	SRR1557256	28	23	strain_sam	C57BL/6J
PRJNA259419	SRR1557257	40	40	strain_sam	C57BL/6J
PRJNA259419	SRR1557258	28	39	strain_sam	C57BL/6J
PRJNA264588	SRR1654198	771	1108	breed_sam	C57BL/6J
PRJNA264588	SRR1654199	607	803	breed_sam	C57BL/6J
PRJNA264588	SRR1654200	646	999	breed_sam	C57BL/6J
PRJNA264588	SRR1654201	574	824	breed_sam	C57BL/6J
PRJNA264588	SRR1654204	492	859	breed_sam	C57BL/6J
PRJNA264588	SRR1654206	359	577	breed_sam	C57BL/6J
PRJNA264588	SRR1654207	446	684	breed_sam	C57BL/6J
PRJNA264807	SRR1624949	268	372	strain_sam	C57BL/6J
PRJNA264807	SRR1624950	231	266	strain_sam	C57BL/6J
PRJNA264807	SRR1624951	293	37	strain_sam	C57BL/6J
PRJNA264807	SRR1624955	285	531	strain_sam	C57BL/6J
PRJNA264807	SRR1624956	328	665	strain_sam	C57BL/6J
PRJNA264807	SRR1624957	284	316	strain_sam	C57BL/6J
PRJNA264807	SRR1624958	408	759	strain_sam	C57BL/6J
PRJNA264807	SRR1624959	305	463	strain_sam	C57BL/6J
PRJNA264807	SRR1624960	343	635	strain_sam	C57BL/6J
PRJNA264807	SRR1624961	355	483	strain_sam	C57BL/6J
PRJNA264807	SRR1624962	309	456	strain_sam	C57BL/6J
PRJNA264807	SRR1624963	292	308	strain_sam	C57BL/6J
PRJNA264807	SRR1624964	265	416	strain_sam	C57BL/6J
PRJNA264807	SRR1624965	364	431	strain_sam	C57BL/6J
PRJNA264807	SRR1624966	326	322	strain_sam	C57BL/6J
PRJNA264807	SRR1624967	327	265	strain_sam	C57BL/6J
PRJNA264807	SRR1624968	378	451	strain_sam	C57BL/6J
PRJNA264807	SRR1624969	458	786	strain_sam	C57BL/6J
PRJNA264807	SRR1624970	381	364	strain_sam	C57BL/6J
PRJNA264807	SRR1624971	353	218	strain_sam	C57BL/6J
PRJNA264807	SRR1624972	349	604	strain_sam	C57BL/6J
PRJNA264807	SRR1624973	456	746	strain_sam	C57BL/6J
PRJNA264807	SRR1624974	339	343	strain_sam	C57BL/6J
PRJNA264807	SRR1624975	380	520	strain_sam	C57BL/6J
PRJNA264807	SRR1624976	396	406	strain_sam	C57BL/6J
PRJNA268973	SRR1686782	38	32	strain_sam	C57BL/6J
PRJNA268973	SRR1686784	32	22	strain_sam	C57BL/6J
PRJNA268973	SRR1686785	20	14	strain_sam	C57BL/6J
PRJNA279486	SRR1930923	27	10	strain_sam	C57BL/6J
PRJNA279486	SRR1930969	26	13	strain_sam	C57BL/6J
PRJNA279486	SRR1930971	49	37	strain_sam	C57BL/6J
PRJNA279486	SRR1930985	10	19	strain_sam	C57BL/6J
PRJNA279486	SRR1931066	10	10	strain_sam	C57BL/6J
PRJNA279486	SRR1931105	28	37	strain_sam	C57BL/6J
PRJNA279486	SRR3137817	67	14	strain_sam	C57BL/6J
PRJNA279486	SRR3137822	113	65	strain_sam	C57BL/6J
PRJNA279486	SRR3137828	123	97	strain_sam	C57BL/6J
PRJNA279486	SRR3137847	62	84	strain_sam	C57BL/6J
PRJNA279486	SRR3137856	13	22	strain_sam	C57BL/6J
PRJNA279486	SRR3137858	31	33	strain_sam	C57BL/6J
PRJNA279486	SRR3137939	365	368	strain_sam	C57BL/6J
PRJNA279486	SRR3137969	79	90	strain_sam	C57BL/6J
PRJNA284927	SRR2040098	16	51	strain_background_sam	C57BL/6J
PRJNA284927	SRR2040099	27	46	strain_background_sam	C57BL/6J
PRJNA284927	SRR2040103	24	47	strain_background_sam	C57BL/6J
PRJNA284927	SRR2040104	12	29	strain_background_sam	C57BL/6J
PRJNA284927	SRR2040105	14	44	strain_background_sam	C57BL/6J
PRJNA284927	SRR2040106	36	97	strain_background_sam	C57BL/6J
PRJNA284927	SRR2040107	14	42	strain_background_sam	C57BL/6J
PRJNA284927	SRR2040108	63	104	strain_background_sam	C57BL/6J
PRJNA284927	SRR2040109	45	123	strain_background_sam	C57BL/6J
PRJNA293292	SRR2174544	27	51	strain_sam	C57BL/6J
PRJNA293292	SRR2174545	22	41	strain_sam	C57BL/6J
PRJNA293292	SRR2174546	26	35	strain_sam	C57BL/6J
PRJNA293292	SRR2174547	20	32	strain_sam	C57BL/6J
PRJNA295089	SRR2302177	33	22	strain_sam	C57BL/6J
PRJNA300632	SRR2874487	104	471	strain_background_sam_s_dpl381	C57BL/6J
PRJNA300632	SRR2874489	444	996	strain_background_sam_s_dpl381	C57BL/6J
PRJNA300632	SRR2874490	222	12	strain_background_sam_s_dpl381	C57BL/6J
PRJNA300632	SRR2874494	222	11	strain_background_sam_s_dpl381	C57BL/6J
PRJNA300632	SRR2874496	238	625	strain_background_sam_s_dpl381	C57BL/6J
PRJNA300632	SRR2874497	255	36	strain_background_sam_s_dpl381	C57BL/6J
PRJNA300633	SRR2874477	195	974	strain_background_sam_s_dpl381	C57BL/6J
PRJNA300633	SRR2874478	12	157	strain_background_sam_s_dpl381	C57BL/6J
PRJNA300633	SRR2874479	12	136	strain_background_sam_s_dpl381	C57BL/6J
PRJNA300633	SRR2874480	230	1090	strain_background_sam_s_dpl381	C57BL/6J
PRJNA300633	SRR2874481	73	561	strain_background_sam_s_dpl381	C57BL/6J
PRJNA300633	SRR2874482	391	882	strain_background_sam_s_dpl381	C57BL/6J
PRJNA300633	SRR2874483	189	466	strain_background_sam_s_dpl381	C57BL/6J
PRJNA300633	SRR2874484	387	757	strain_background_sam_s_dpl381	C57BL/6J
PRJNA300633	SRR2874485	105	78	strain_background_sam_s_dpl381	C57BL/6J
PRJNA301340	SRR2927706	157	77	strain_sam	C57BL/6J
PRJNA308178	SRR3089952	30	53	strain_sam	C57BL/6J
PRJNA308178	SRR3089954	33	57	strain_sam	C57BL/6J
PRJNA308178	SRR3089955	29	37	strain_sam	C57BL/6J
PRJNA309578	SRR3114323	13	19	strain_sam	C57BL/6J
PRJNA309578	SRR3114325	52	57	strain_sam	C57BL/6J
PRJNA309578	SRR3114326	19	38	strain_sam	C57BL/6J
PRJNA309578	SRR3114327	44	71	strain_sam	C57BL/6J
PRJNA309578	SRR3114328	53	63	strain_sam	C57BL/6J
PRJNA309578	SRR3114329	28	40	strain_sam	C57BL/6J
PRJNA309578	SRR3114330	37	41	strain_sam	C57BL/6J
PRJNA309578	SRR3114331	16	29	strain_sam	C57BL/6J
PRJNA309578	SRR3114332	11	29	strain_sam	C57BL/6J
PRJNA309578	SRR3114333	28	35	strain_sam	C57BL/6J
PRJNA309578	SRR3114334	46	70	strain_sam	C57BL/6J
PRJNA309578	SRR3114335	29	45	strain_sam	C57BL/6J
PRJNA309578	SRR3114336	20	61	strain_sam	C57BL/6J
PRJNA309578	SRR3114337	39	51	strain_sam	C57BL/6J
PRJNA309578	SRR3114338	27	54	strain_sam	C57BL/6J
PRJNA309578	SRR3114339	20	33	strain_sam	C57BL/6J
PRJNA309578	SRR3114340	30	44	strain_sam	C57BL/6J
PRJNA310412	SRR3138251	32	34	strain_sam	C57BL/6J
PRJNA310412	SRR3138252	21	31	strain_sam	C57BL/6J
PRJNA310412	SRR3138253	28	24	strain_sam	C57BL/6J
PRJNA310412	SRR3138254	47	103	strain_sam	C57BL/6J
PRJNA310412	SRR3138255	42	90	strain_sam	C57BL/6J
PRJNA310412	SRR3138256	43	94	strain_sam	C57BL/6J
PRJNA310412	SRR3138257	14	20	strain_sam	C57BL/6J
PRJNA310412	SRR3138259	14	10	strain_sam	C57BL/6J
PRJNA310412	SRR3138260	48	60	strain_sam	C57BL/6J
PRJNA310412	SRR3138261	26	20	strain_sam	C57BL/6J
PRJNA310412	SRR3138262	31	51	strain_sam	C57BL/6J
PRJNA312672	SRR3180544	25	45	strain_sam	C57BL/6J
PRJNA312672	SRR3180546	41	65	strain_sam	C57BL/6J
PRJNA312672	SRR3180548	23	37	strain_sam	C57BL/6J
PRJNA312672	SRR3180549	36	56	strain_sam	C57BL/6J
PRJNA312672	SRR3180556	31	42	strain_sam	C57BL/6J
PRJNA312672	SRR3180557	30	32	strain_sam	C57BL/6J
PRJNA312672	SRR3180558	37	73	strain_sam	C57BL/6J
PRJNA312672	SRR3180559	35	63	strain_sam	C57BL/6J
PRJNA312845	SRR3182834	60	132	strain_sam	C57BL/6J
PRJNA312845	SRR3182835	78	224	strain_sam	C57BL/6J
PRJNA312845	SRR3182863	103	138	strain_sam	C57BL/6J
PRJNA312845	SRR3182864	34	81	strain_sam	C57BL/6J
PRJNA315344	SRR3226457	80	144	background_strain_sam_s_dpl78	C57BL/6J
PRJNA315666	SRR3236817	20	104	strain_sam	C57BL/6J
PRJNA315666	SRR3236818	31	25	strain_sam	C57BL/6J
PRJNA315666	SRR3236819	41	32	strain_sam	C57BL/6J
PRJNA315666	SRR3236820	38	30	strain_sam	C57BL/6J
PRJNA315666	SRR3236821	46	24	strain_sam	C57BL/6J
PRJNA315666	SRR3236822	30	36	strain_sam	C57BL/6J
PRJNA315666	SRR3236823	43	24	strain_sam	C57BL/6J
PRJNA322136	SRR3544829	124	198	strain_sam	C57BL/6J
PRJNA322136	SRR3547022	87	164	strain_sam	C57BL/6J
PRJNA322136	SRR3547029	107	159	strain_sam	C57BL/6J
PRJNA322136	SRR3547036	113	203	strain_sam	C57BL/6J
PRJNA322136	SRR3547142	107	199	strain_sam	C57BL/6J
PRJNA324547	SRR3630461	35	47	strain_sam	C57BL/6J
PRJNA324547	SRR3630462	32	44	strain_sam	C57BL/6J
PRJNA324547	SRR3630464	33	56	strain_sam	C57BL/6J
PRJNA325455	SRR3659156	34	28	strain_sam	C57BL/6J
PRJNA325455	SRR3659157	43	40	strain_sam	C57BL/6J
PRJNA325455	SRR3659158	38	67	strain_sam	C57BL/6J
PRJNA325455	SRR3659159	59	86	strain_sam	C57BL/6J
PRJNA325455	SRR3659162	47	70	strain_sam	C57BL/6J
PRJNA325455	SRR3659164	129	181	strain_sam	C57BL/6J
PRJNA325455	SRR3659165	89	139	strain_sam	C57BL/6J
PRJNA325508	SRR3660506	105	133	strain_sam	C57BL/6J
PRJNA325508	SRR3660508	150	122	strain_sam	C57BL/6J
PRJNA325508	SRR3660511	63	75	strain_sam	C57BL/6J
PRJNA325508	SRR3660513	132	131	strain_sam	C57BL/6J
PRJNA325508	SRR3660515	115	133	strain_sam	C57BL/6J
PRJNA325508	SRR3660518	70	76	strain_sam	C57BL/6J
PRJNA325508	SRR3660520	110	135	strain_sam	C57BL/6J
PRJNA325508	SRR3660522	105	129	strain_sam	C57BL/6J
PRJNA325508	SRR3660525	75	82	strain_sam	C57BL/6J
PRJNA327029	SRR3724415	64	77	strain_sam	C57BL/6J
PRJNA327029	SRR3724416	38	33	strain_sam	C57BL/6J
PRJNA327029	SRR3724417	26	31	strain_sam	C57BL/6J
PRJNA327029	SRR3724418	58	64	strain_sam	C57BL/6J
PRJNA327029	SRR3724419	25	19	strain_sam	C57BL/6J
PRJNA327029	SRR3724420	36	55	strain_sam	C57BL/6J
PRJNA327029	SRR3724421	29	45	strain_sam	C57BL/6J
PRJNA327029	SRR3724422	27	31	strain_sam	C57BL/6J
PRJNA327029	SRR3724423	35	40	strain_sam	C57BL/6J
PRJNA327029	SRR3724424	13	25	strain_sam	C57BL/6J
PRJNA327029	SRR3724425	58	84	strain_sam	C57BL/6J
PRJNA327029	SRR3724426	36	35	strain_sam	C57BL/6J
PRJNA327029	SRR3724427	23	44	strain_sam	C57BL/6J
PRJNA327029	SRR3724428	17	33	strain_sam	C57BL/6J
PRJNA329408	SRR3927217	21	27	strain_sam	C57BL/6J
PRJNA329408	SRR3927218	22	25	strain_sam	C57BL/6J
PRJNA329408	SRR3927219	27	14	strain_sam	C57BL/6J
PRJNA329408	SRR3927221	13	13	strain_sam	C57BL/6J
PRJNA329408	SRR3927222	42	20	strain_sam	C57BL/6J
PRJNA329408	SRR3927229	60	38	strain_sam	C57BL/6J
PRJNA329408	SRR3927230	30	18	strain_sam	C57BL/6J
PRJNA329408	SRR3927231	24	17	strain_sam	C57BL/6J
PRJNA329408	SRR3927232	31	28	strain_sam	C57BL/6J
PRJNA329408	SRR3927233	24	11	strain_sam	C57BL/6J
PRJNA329408	SRR3927234	13	12	strain_sam	C57BL/6J
PRJNA329408	SRR3927238	30	20	strain_sam	C57BL/6J
PRJNA343661	SRR4291293	22	70	strain_sam	C57BL/6J
PRJNA354803	SRR5081567	54	44	strain_sam	C57BL/6J
PRJNA354803	SRR5081569	43	27	strain_sam	C57BL/6J
PRJNA356286	SRR5077533	17	10	strain_sam	C57BL/6J
PRJNA356751	SRR5088587	51	54	strain_background_sam_s_dpl381	C57BL/6J
PRJNA359189	SRR5133541	20	49	background_strain_sam_s_dpl78	C57BL/6J
PRJNA359189	SRR5133544	34	26	background_strain_sam_s_dpl78	C57BL/6J
PRJNA360958	SRR5168172	111	130	strain_sam	C57BL/6J
PRJNA360958	SRR5168174	112	127	strain_sam	C57BL/6J
PRJNA360958	SRR5168180	65	114	strain_sam	C57BL/6J
PRJNA360958	SRR5168184	34	22	strain_sam	C57BL/6J
PRJNA360958	SRR5168186	73	82	strain_sam	C57BL/6J
PRJNA360958	SRR5168188	102	32	strain_sam	C57BL/6J
PRJNA360958	SRR5168190	217	264	strain_sam	C57BL/6J
PRJNA360958	SRR5168192	210	271	strain_sam	C57BL/6J
PRJNA360958	SRR5168194	159	271	strain_sam	C57BL/6J
PRJNA369438	SRR5808557	84	96	strain_sam	C57BL/6J
PRJNA369438	SRR5808558	35	36	strain_sam	C57BL/6J
PRJNA374929	SRR5410464	22	33	strain_sam	C57BL/6J
PRJNA379430	SRR5350355	24	48	strain_sam	C57BL/6J
PRJNA379430	SRR5350358	29	63	strain_sam	C57BL/6J
PRJNA379430	SRR5350361	17	29	strain_sam	C57BL/6J
PRJNA379430	SRR5350365	22	23	strain_sam	C57BL/6J
PRJNA379430	SRR5350368	11	12	strain_sam	C57BL/6J
PRJNA379430	SRR5350375	14	34	strain_sam	C57BL/6J
PRJNA379430	SRR5350378	32	44	strain_sam	C57BL/6J
PRJNA379430	SRR5350382	13	47	strain_sam	C57BL/6J
PRJNA379430	SRR5350386	12	32	strain_sam	C57BL/6J
PRJNA379430	SRR5350389	19	31	strain_sam	C57BL/6J
PRJNA379430	SRR5350396	24	67	strain_sam	C57BL/6J
PRJNA379430	SRR5350399	10	25	strain_sam	C57BL/6J
PRJNA380088	SRR5371525	73	172	breed_sam	C57BL/6J
PRJNA380088	SRR5371526	78	170	breed_sam	C57BL/6J
PRJNA380088	SRR5371528	107	230	breed_sam	C57BL/6J
PRJNA380088	SRR5371531	141	296	breed_sam	C57BL/6J
PRJNA380960	SRR5388895	49	140	strain_sam	C57BL/6J
PRJNA382450	SRR5644720	45	52	strain_sam	C57BL/6J
PRJNA382450	SRR5644721	118	135	strain_sam	C57BL/6J
PRJNA382450	SRR5644727	94	110	strain_sam	C57BL/6J
PRJNA385694	SRR5514628	33	66	strain_background_sam	C57BL/6J
PRJNA385694	SRR5514629	45	79	strain_background_sam	C57BL/6J
PRJNA385694	SRR5514633	33	48	strain_background_sam	C57BL/6J
PRJNA385694	SRR5514634	28	48	strain_background_sam	C57BL/6J
PRJNA385694	SRR5514635	17	35	strain_background_sam	C57BL/6J
PRJNA385694	SRR5514639	32	60	strain_background_sam	C57BL/6J
PRJNA385694	SRR5514641	28	93	strain_background_sam	C57BL/6J
PRJNA386382	SRR5533418	78	69	strain_sam	C57BL/6J
PRJNA386382	SRR5533419	83	139	strain_sam	C57BL/6J
PRJNA386382	SRR5533420	40	55	strain_sam	C57BL/6J
PRJNA386382	SRR5533422	60	102	strain_sam	C57BL/6J
PRJNA386382	SRR5533423	26	85	strain_sam	C57BL/6J
PRJNA386382	SRR5533424	90	74	strain_sam	C57BL/6J
PRJNA386382	SRR5533435	118	20	strain_sam	C57BL/6J
PRJNA387297	SRR5578754	106	206	strain_sam	C57BL/6J
PRJNA387297	SRR5578755	71	112	strain_sam	C57BL/6J
PRJNA387297	SRR5578756	79	127	strain_sam	C57BL/6J
PRJNA387297	SRR5578757	40	60	strain_sam	C57BL/6J
PRJNA387297	SRR5578758	44	104	strain_sam	C57BL/6J
PRJNA387703	SRR5591653	12	21	strain_sam	C57BL/6J
PRJNA387703	SRR5591655	15	12	strain_sam	C57BL/6J
PRJNA387703	SRR5591657	11	10	strain_sam	C57BL/6J
PRJNA387703	SRR5591661	10	14	strain_sam	C57BL/6J
PRJNA387703	SRR5591662	14	11	strain_sam	C57BL/6J
PRJNA387703	SRR5591663	15	23	strain_sam	C57BL/6J
PRJNA387703	SRR5591688	22	22	strain_sam	C57BL/6J
PRJNA387703	SRR5591689	17	62	strain_sam	C57BL/6J
PRJNA387703	SRR5591690	43	72	strain_sam	C57BL/6J
PRJNA387703	SRR5591691	29	32	strain_sam	C57BL/6J
PRJNA387703	SRR5591692	29	46	strain_sam	C57BL/6J
PRJNA387703	SRR5591694	28	62	strain_sam	C57BL/6J
PRJNA387703	SRR5591695	24	45	strain_sam	C57BL/6J
PRJNA387703	SRR5591696	24	32	strain_sam	C57BL/6J
PRJNA387703	SRR5591697	37	39	strain_sam	C57BL/6J
PRJNA387703	SRR5591698	39	53	strain_sam	C57BL/6J
PRJNA387703	SRR5591702	15	34	strain_sam	C57BL/6J
PRJNA387703	SRR5591705	29	49	strain_sam	C57BL/6J
PRJNA388202	SRR5617735	126	165	strain_sam	C57BL/6J
PRJNA388202	SRR5617736	124	137	strain_sam	C57BL/6J
PRJNA388202	SRR5617737	134	175	strain_sam	C57BL/6J
PRJNA388202	SRR5617738	159	252	strain_sam	C57BL/6J
PRJNA389601	SRR5657253	42	101	strain_sam	C57BL/6J
PRJNA389601	SRR5657254	28	91	strain_sam	C57BL/6J
PRJNA389601	SRR5657255	29	57	strain_sam	C57BL/6J
PRJNA389601	SRR5657256	35	72	strain_sam	C57BL/6J
PRJNA389601	SRR5657257	17	35	strain_sam	C57BL/6J
PRJNA389601	SRR5657258	22	36	strain_sam	C57BL/6J
PRJNA389601	SRR5657259	13	31	strain_sam	C57BL/6J
PRJNA389601	SRR5657260	30	30	strain_sam	C57BL/6J
PRJNA389601	SRR5657261	34	86	strain_sam	C57BL/6J
PRJNA389601	SRR5657262	33	129	strain_sam	C57BL/6J
PRJNA389601	SRR5657263	53	138	strain_sam	C57BL/6J
PRJNA389601	SRR5657264	57	82	strain_sam	C57BL/6J
PRJNA389601	SRR5657265	15	22	strain_sam	C57BL/6J
PRJNA389601	SRR5657266	30	52	strain_sam	C57BL/6J
PRJNA389601	SRR5657267	24	43	strain_sam	C57BL/6J
PRJNA389601	SRR5657268	35	40	strain_sam	C57BL/6J
PRJNA389601	SRR5657269	93	223	strain_sam	C57BL/6J
PRJNA389601	SRR5657270	52	144	strain_sam	C57BL/6J
PRJNA389601	SRR5657271	59	165	strain_sam	C57BL/6J
PRJNA389601	SRR5657272	37	79	strain_sam	C57BL/6J
PRJNA389601	SRR5657273	36	64	strain_sam	C57BL/6J
PRJNA389601	SRR5657274	32	67	strain_sam	C57BL/6J
PRJNA389601	SRR5657275	30	48	strain_sam	C57BL/6J
PRJNA389601	SRR5657276	20	42	strain_sam	C57BL/6J
PRJNA389601	SRR5657277	53	147	strain_sam	C57BL/6J
PRJNA389601	SRR5657278	45	107	strain_sam	C57BL/6J
PRJNA389601	SRR5657279	59	131	strain_sam	C57BL/6J
PRJNA389601	SRR5657280	31	70	strain_sam	C57BL/6J
PRJNA389601	SRR5657281	24	51	strain_sam	C57BL/6J
PRJNA389601	SRR5657282	37	65	strain_sam	C57BL/6J
PRJNA389601	SRR5657283	27	43	strain_sam	C57BL/6J
PRJNA389601	SRR5657284	18	30	strain_sam	C57BL/6J
PRJNA389601	SRR5812845	61	139	strain_sam	C57BL/6J
PRJNA389601	SRR5812846	35	114	strain_sam	C57BL/6J
PRJNA389601	SRR5812847	59	147	strain_sam	C57BL/6J
PRJNA389601	SRR5812848	41	87	strain_sam	C57BL/6J
PRJNA390628	SRR5755753	15	24	strain_sam	C57BL/6J
PRJNA390628	SRR5755759	25	47	strain_sam	C57BL/6J
PRJNA390628	SRR5755760	23	37	strain_sam	C57BL/6J
PRJNA390628	SRR5755769	11	10	strain_sam	C57BL/6J
PRJNA390628	SRR5755773	19	35	strain_sam	C57BL/6J
PRJNA390628	SRR5755777	14	12	strain_sam	C57BL/6J
PRJNA390628	SRR5755779	15	23	strain_sam	C57BL/6J
PRJNA390628	SRR5755780	21	27	strain_sam	C57BL/6J
PRJNA390628	SRR5755785	14	44	strain_sam	C57BL/6J
PRJNA390628	SRR5755786	12	20	strain_sam	C57BL/6J
PRJNA390628	SRR5755787	13	16	strain_sam	C57BL/6J
PRJNA390628	SRR5755788	17	27	strain_sam	C57BL/6J
PRJNA390628	SRR5755789	14	19	strain_sam	C57BL/6J
PRJNA390628	SRR5755792	21	17	strain_sam	C57BL/6J
PRJNA390628	SRR5755795	17	20	strain_sam	C57BL/6J
PRJNA390628	SRR5755796	23	43	strain_sam	C57BL/6J
PRJNA390628	SRR5755798	14	11	strain_sam	C57BL/6J
PRJNA390628	SRR5755799	26	18	strain_sam	C57BL/6J
PRJNA390628	SRR5755800	34	35	strain_sam	C57BL/6J
PRJNA397481	SRR6006939	48	52	background_strain_sam_s_dpl78	C57BL/6J
PRJNA397481	SRR6006940	51	56	background_strain_sam_s_dpl78	C57BL/6J
PRJNA400076	SRR5973217	93	78	strain_sam	C57BL/6J
PRJNA407476	SRR6041868	118	149	strain_sam	C57BL/6J
PRJNA407606	SRR6049382	72	24	strain_sam	C57BL/6J
PRJNA417392	SRR7146512	33	35	strain_sam	C57BL/6J
PRJNA417392	SRR7146513	25	22	strain_sam	C57BL/6J
PRJNA417392	SRR7146514	39	33	strain_sam	C57BL/6J
PRJNA417392	SRR7146515	17	29	strain_sam	C57BL/6J
PRJNA417392	SRR7146516	22	27	strain_sam	C57BL/6J
PRJNA417392	SRR7146518	29	18	strain_sam	C57BL/6J
PRJNA417392	SRR7146519	18	23	strain_sam	C57BL/6J
PRJNA417392	SRR7146520	48	61	strain_sam	C57BL/6J
PRJNA417717	SRR6277000	38	43	strain_sam	C57BL/6J
PRJNA417717	SRR6277001	52	33	strain_sam	C57BL/6J
PRJNA417717	SRR6277002	48	41	strain_sam	C57BL/6J
PRJNA417717	SRR6277003	33	56	strain_sam	C57BL/6J
PRJNA417717	SRR6277005	27	40	strain_sam	C57BL/6J
PRJNA417717	SRR6277006	21	28	strain_sam	C57BL/6J
PRJNA417717	SRR6277007	52	55	strain_sam	C57BL/6J
PRJNA417717	SRR6277008	25	43	strain_sam	C57BL/6J
PRJNA417717	SRR6277009	40	42	strain_sam	C57BL/6J
PRJNA417717	SRR6277011	39	51	strain_sam	C57BL/6J
PRJNA417717	SRR6277029	28	48	strain_sam	C57BL/6J
PRJNA417717	SRR6277030	40	60	strain_sam	C57BL/6J
PRJNA417717	SRR6277031	54	97	strain_sam	C57BL/6J
PRJNA417717	SRR6277032	32	44	strain_sam	C57BL/6J
PRJNA417717	SRR6277033	28	43	strain_sam	C57BL/6J
PRJNA417717	SRR6277034	37	72	strain_sam	C57BL/6J
PRJNA417717	SRR6277035	32	63	strain_sam	C57BL/6J
PRJNA418087	SRR6282534	87	108	strain_sam	C57BL/6J
PRJNA418087	SRR6282536	74	107	strain_sam	C57BL/6J
PRJNA418087	SRR6282538	55	104	strain_sam	C57BL/6J
PRJNA418087	SRR6282539	48	81	strain_sam	C57BL/6J
PRJNA418087	SRR6282540	50	72	strain_sam	C57BL/6J
PRJNA418087	SRR6282541	64	111	strain_sam	C57BL/6J
PRJNA418087	SRR6282542	65	77	strain_sam	C57BL/6J
PRJNA418087	SRR6282543	37	66	strain_sam	C57BL/6J
PRJNA418087	SRR6282544	60	95	strain_sam	C57BL/6J
PRJNA418087	SRR6282545	45	67	strain_sam	C57BL/6J
PRJNA418087	SRR6282546	28	63	strain_sam	C57BL/6J
PRJNA418087	SRR6282547	50	69	strain_sam	C57BL/6J
PRJNA418087	SRR6282548	41	56	strain_sam	C57BL/6J
PRJNA418087	SRR6282549	42	55	strain_sam	C57BL/6J
PRJNA418087	SRR6282550	40	69	strain_sam	C57BL/6J
PRJNA418087	SRR6282552	35	49	strain_sam	C57BL/6J
PRJNA418087	SRR6282553	59	88	strain_sam	C57BL/6J
PRJNA418087	SRR6282554	51	70	strain_sam	C57BL/6J
PRJNA418087	SRR6282555	42	76	strain_sam	C57BL/6J
PRJNA418087	SRR6282556	77	103	strain_sam	C57BL/6J
PRJNA418087	SRR6282557	67	110	strain_sam	C57BL/6J
PRJNA418087	SRR6282559	60	45	strain_sam	C57BL/6J
PRJNA418087	SRR6282560	58	77	strain_sam	C57BL/6J
PRJNA418087	SRR6282561	53	86	strain_sam	C57BL/6J
PRJNA418087	SRR6282562	51	67	strain_sam	C57BL/6J
PRJNA418087	SRR6282563	22	100	strain_sam	C57BL/6J
PRJNA418087	SRR6282564	54	82	strain_sam	C57BL/6J
PRJNA418087	SRR6282565	56	93	strain_sam	C57BL/6J
PRJNA418087	SRR6282566	53	85	strain_sam	C57BL/6J
PRJNA418087	SRR6282567	41	97	strain_sam	C57BL/6J
PRJNA418087	SRR6282568	67	92	strain_sam	C57BL/6J
PRJNA418087	SRR6282569	92	81	strain_sam	C57BL/6J
PRJNA418087	SRR6282570	48	92	strain_sam	C57BL/6J
PRJNA418087	SRR6282571	64	85	strain_sam	C57BL/6J
PRJNA418087	SRR6282572	54	63	strain_sam	C57BL/6J
PRJNA418087	SRR6282573	58	78	strain_sam	C57BL/6J
PRJNA418087	SRR6282574	51	65	strain_sam	C57BL/6J
PRJNA418087	SRR6282575	65	84	strain_sam	C57BL/6J
PRJNA418087	SRR6282576	53	84	strain_sam	C57BL/6J
PRJNA418087	SRR6282577	66	85	strain_sam	C57BL/6J
PRJNA419007	SRR6305404	24	48	strain_sam	C57BL/6J
PRJNA419007	SRR6305410	33	53	strain_sam	C57BL/6J
PRJNA419007	SRR6305415	10	33	strain_sam	C57BL/6J
PRJNA432128	SRR6660734	80	47	ecotype_sam	C57BL/6J
PRJNA432561	SRR6663110	23	25	strain_sam	C57BL/6J
PRJNA433651	SRR6703508	59	151	strain_sam	C57BL/6J
PRJNA433651	SRR6703511	36	174	strain_sam	C57BL/6J
PRJNA433651	SRR6703512	20	57	strain_sam	C57BL/6J
PRJNA433651	SRR6703515	39	126	strain_sam	C57BL/6J
PRJNA433651	SRR6703516	75	185	strain_sam	C57BL/6J
PRJNA433651	SRR6703517	19	28	strain_sam	C57BL/6J
PRJNA433651	SRR6703519	35	65	strain_sam	C57BL/6J
PRJNA433651	SRR6703520	42	75	strain_sam	C57BL/6J
PRJNA433651	SRR6703521	53	106	strain_sam	C57BL/6J
PRJNA433651	SRR6703522	38	119	strain_sam	C57BL/6J
PRJNA433651	SRR6703523	34	60	strain_sam	C57BL/6J
PRJNA433651	SRR6703524	57	102	strain_sam	C57BL/6J
PRJNA433651	SRR6703526	30	93	strain_sam	C57BL/6J
PRJNA433651	SRR6703527	54	73	strain_sam	C57BL/6J
PRJNA433651	SRR6703528	42	63	strain_sam	C57BL/6J
PRJNA433651	SRR6703529	59	82	strain_sam	C57BL/6J
PRJNA434076	SRR6726030	13	13	strain_sam	C57BL/6J
PRJNA434380	SRR6753782	70	65	strain_sam	C57BL/6J
PRJNA434380	SRR6753783	101	100	strain_sam	C57BL/6J
PRJNA434380	SRR6753784	90	110	strain_sam	C57BL/6J
PRJNA434380	SRR6753785	66	62	strain_sam	C57BL/6J
PRJNA434380	SRR6753814	80	82	strain_sam	C57BL/6J
PRJNA434380	SRR6753815	92	97	strain_sam	C57BL/6J
PRJNA434380	SRR6753840	120	75	strain_sam	C57BL/6J
PRJNA434380	SRR6753843	76	54	strain_sam	C57BL/6J
PRJNA434380	SRR6753844	42	19	strain_sam	C57BL/6J
PRJNA434380	SRR6753845	74	32	strain_sam	C57BL/6J
PRJNA434380	SRR6753846	92	56	strain_sam	C57BL/6J
PRJNA434380	SRR6753847	97	61	strain_sam	C57BL/6J
PRJNA434380	SRR6753848	76	42	strain_sam	C57BL/6J
PRJNA434380	SRR6753849	74	57	strain_sam	C57BL/6J
PRJNA434380	SRR6753850	126	66	strain_sam	C57BL/6J
PRJNA437732	SRR6825431	295	380	strain_sam	C57BL/6J
PRJNA437732	SRR6825432	181	258	strain_sam	C57BL/6J
PRJNA437732	SRR6825441	93	126	strain_sam	C57BL/6J
PRJNA437732	SRR6825442	85	100	strain_sam	C57BL/6J
PRJNA437732	SRR6825443	84	176	strain_sam	C57BL/6J
PRJNA437732	SRR6825444	126	236	strain_sam	C57BL/6J
PRJNA437732	SRR6825445	247	312	strain_sam	C57BL/6J
PRJNA437732	SRR6825446	145	170	strain_sam	C57BL/6J
PRJNA437732	SRR6825447	94	224	strain_sam	C57BL/6J
PRJNA437732	SRR6825448	103	137	strain_sam	C57BL/6J
PRJNA437732	SRR6825449	72	120	strain_sam	C57BL/6J
PRJNA437732	SRR6825450	87	185	strain_sam	C57BL/6J
PRJNA437732	SRR6825451	96	175	strain_sam	C57BL/6J
PRJNA437732	SRR6825452	72	160	strain_sam	C57BL/6J
PRJNA437732	SRR6825453	82	176	strain_sam	C57BL/6J
PRJNA437732	SRR6825454	161	215	strain_sam	C57BL/6J
PRJNA437732	SRR6825455	155	164	strain_sam	C57BL/6J
PRJNA437732	SRR6825456	140	159	strain_sam	C57BL/6J
PRJNA437732	SRR6825457	124	202	strain_sam	C57BL/6J
PRJNA437732	SRR6825458	107	212	strain_sam	C57BL/6J
PRJNA437732	SRR6825459	133	177	strain_sam	C57BL/6J
PRJNA437732	SRR6825460	60	117	strain_sam	C57BL/6J
PRJNA438825	SRR6906176	109	152	strain_sam	C57BL/6J
PRJNA438825	SRR6906178	120	140	strain_sam	C57BL/6J
PRJNA438825	SRR6906180	99	120	strain_sam	C57BL/6J
PRJNA439403	SRR6873683	21	32	breed_sam	C57BL/6J
PRJNA439403	SRR6873684	32	40	breed_sam	C57BL/6J
PRJNA448887	SRR6946223	22	29	strain_sam	C57BL/6J
PRJNA448887	SRR6946224	19	45	strain_sam	C57BL/6J
PRJNA448887	SRR6946225	33	62	strain_sam	C57BL/6J
PRJNA448887	SRR6946226	33	51	strain_sam	C57BL/6J
PRJNA448887	SRR6946227	54	113	strain_sam	C57BL/6J
PRJNA448887	SRR6946228	37	105	strain_sam	C57BL/6J
PRJNA449667	SRR6983496	18	46	strain_sam	C57BL/6J
PRJNA449667	SRR6983498	348	778	strain_sam	C57BL/6J
PRJNA449667	SRR6983499	97	168	strain_sam	C57BL/6J
PRJNA449667	SRR6983500	174	236	strain_sam	C57BL/6J
PRJNA449709	SRR6984609	57	101	strain_sam	C57BL/6J
PRJNA449709	SRR6984610	49	104	strain_sam	C57BL/6J
PRJNA449709	SRR6984611	67	132	strain_sam	C57BL/6J
PRJNA449709	SRR6984612	35	87	strain_sam	C57BL/6J
PRJNA449709	SRR6984613	87	121	strain_sam	C57BL/6J
PRJNA449709	SRR6984614	62	112	strain_sam	C57BL/6J
PRJNA449709	SRR6984615	33	73	strain_sam	C57BL/6J
PRJNA449709	SRR6984616	52	86	strain_sam	C57BL/6J
PRJNA449709	SRR6984617	23	60	strain_sam	C57BL/6J
PRJNA449709	SRR6984618	29	48	strain_sam	C57BL/6J
PRJNA449709	SRR6984619	28	34	strain_sam	C57BL/6J
PRJNA449709	SRR6984620	23	49	strain_sam	C57BL/6J
PRJNA449709	SRR6984621	39	83	strain_sam	C57BL/6J
PRJNA449709	SRR6984622	44	93	strain_sam	C57BL/6J
PRJNA449709	SRR6984623	74	136	strain_sam	C57BL/6J
PRJNA449709	SRR6984624	25	63	strain_sam	C57BL/6J
PRJNA449709	SRR6984625	32	47	strain_sam	C57BL/6J
PRJNA449709	SRR6984626	25	43	strain_sam	C57BL/6J
PRJNA471092	SRR7153358	22	54	strain_sam	C57BL/6J
PRJNA471092	SRR7153359	29	51	strain_sam	C57BL/6J
PRJNA471092	SRR7153361	59	88	strain_sam	C57BL/6J
PRJNA471092	SRR7153362	57	87	strain_sam	C57BL/6J
PRJNA471092	SRR7153363	77	79	strain_sam	C57BL/6J
PRJNA471092	SRR7153365	60	55	strain_sam	C57BL/6J
PRJNA471092	SRR7153367	39	80	strain_sam	C57BL/6J
PRJNA471297	SRR7161985	90	161	strain_sam	C57BL/6J
PRJNA471297	SRR7161993	120	201	strain_sam	C57BL/6J
PRJNA471297	SRR7162001	86	174	strain_sam	C57BL/6J
PRJNA471910	SRR7180893	59	102	strain_sam	C57BL/6J
PRJNA471910	SRR7180909	32	61	strain_sam	C57BL/6J
PRJNA471910	SRR7180917	31	86	strain_sam	C57BL/6J
PRJNA471910	SRR7180925	59	113	strain_sam	C57BL/6J
PRJNA471910	SRR7180933	52	120	strain_sam	C57BL/6J
PRJNA471910	SRR7180941	39	95	strain_sam	C57BL/6J
PRJNA471910	SRR7180949	40	99	strain_sam	C57BL/6J
PRJNA471910	SRR7180957	63	80	strain_sam	C57BL/6J
PRJNA471910	SRR7180965	69	96	strain_sam	C57BL/6J
PRJNA471910	SRR7180973	50	68	strain_sam	C57BL/6J
PRJNA471910	SRR7180981	30	94	strain_sam	C57BL/6J
PRJNA471911	SRR7180989	59	100	strain_sam	C57BL/6J
PRJNA471911	SRR7180997	33	108	strain_sam	C57BL/6J
PRJNA471911	SRR7181005	25	99	strain_sam	C57BL/6J
PRJNA471911	SRR7181013	44	74	strain_sam	C57BL/6J
PRJNA471911	SRR7181021	27	81	strain_sam	C57BL/6J
PRJNA471911	SRR7181029	49	59	strain_sam	C57BL/6J
PRJNA471911	SRR7181037	42	77	strain_sam	C57BL/6J
PRJNA471911	SRR7181045	35	95	strain_sam	C57BL/6J
PRJNA471911	SRR7181053	42	77	strain_sam	C57BL/6J
PRJNA471911	SRR7181061	33	111	strain_sam	C57BL/6J
PRJNA471911	SRR7181069	53	73	strain_sam	C57BL/6J
PRJNA471911	SRR7181077	42	80	strain_sam	C57BL/6J
PRJNA471912	SRR7181118	59	89	strain_sam	C57BL/6J
PRJNA471912	SRR7181127	43	42	strain_sam	C57BL/6J
PRJNA471912	SRR7181135	36	57	strain_sam	C57BL/6J
PRJNA471912	SRR7181143	41	83	strain_sam	C57BL/6J
PRJNA471912	SRR7181151	27	58	strain_sam	C57BL/6J
PRJNA471912	SRR7181191	50	100	strain_sam	C57BL/6J
PRJNA471912	SRR7181199	61	94	strain_sam	C57BL/6J
PRJNA471912	SRR7181207	50	97	strain_sam	C57BL/6J
PRJNA472143	SRR7186654	17	32	strain_sam	C57BL/6J
PRJNA472143	SRR7186660	41	36	strain_sam	C57BL/6J
PRJNA472143	SRR7186662	15	36	strain_sam	C57BL/6J
PRJNA473083	SRR7217376	47	67	strain_sam	C57BL/6J
PRJNA473083	SRR7217377	30	56	strain_sam	C57BL/6J
PRJNA473083	SRR7217378	40	68	strain_sam	C57BL/6J
PRJNA473083	SRR7217379	45	68	strain_sam	C57BL/6J
PRJNA473083	SRR7217380	55	87	strain_sam	C57BL/6J
PRJNA473083	SRR7217381	35	64	strain_sam	C57BL/6J
PRJNA473083	SRR7217382	31	77	strain_sam	C57BL/6J
PRJNA473083	SRR7217383	54	69	strain_sam	C57BL/6J
PRJNA473083	SRR7217384	35	76	strain_sam	C57BL/6J
PRJNA473083	SRR7217385	54	85	strain_sam	C57BL/6J
PRJNA473083	SRR7217386	28	77	strain_sam	C57BL/6J
PRJNA473083	SRR7217387	55	74	strain_sam	C57BL/6J
PRJNA473083	SRR7217388	68	108	strain_sam	C57BL/6J
PRJNA473083	SRR7217389	42	65	strain_sam	C57BL/6J
PRJNA473083	SRR7217390	50	75	strain_sam	C57BL/6J
PRJNA473083	SRR7217391	45	74	strain_sam	C57BL/6J
PRJNA473083	SRR7217396	46	60	strain_sam	C57BL/6J
PRJNA473083	SRR7217397	26	31	strain_sam	C57BL/6J
PRJNA473083	SRR7217398	32	36	strain_sam	C57BL/6J
PRJNA473083	SRR7217399	32	28	strain_sam	C57BL/6J
PRJNA473157	SRR7221051	22	59	strain_sam	C57BL/6J
PRJNA473157	SRR7221052	18	70	strain_sam	C57BL/6J
PRJNA473157	SRR7221053	24	73	strain_sam	C57BL/6J
PRJNA473157	SRR7221054	18	47	strain_sam	C57BL/6J
PRJNA473157	SRR7221056	18	55	strain_sam	C57BL/6J
PRJNA473157	SRR7221059	22	68	strain_sam	C57BL/6J
PRJNA475248	SRR7290157	79	70	strain_sam	C57BL/6J
PRJNA475248	SRR7290162	59	69	strain_sam	C57BL/6J
PRJNA475248	SRR7290163	56	17	strain_sam	C57BL/6J
PRJNA477779	SRR7419682	32	41	strain_sam	C57BL/6J
PRJNA477779	SRR7419683	13	11	strain_sam	C57BL/6J
PRJNA477779	SRR7419684	30	21	strain_sam	C57BL/6J
PRJNA477779	SRR7419685	14	55	strain_sam	C57BL/6J
PRJNA477779	SRR7419688	12	32	strain_sam	C57BL/6J
PRJNA477779	SRR7419690	14	68	strain_sam	C57BL/6J
PRJNA477779	SRR7419692	21	41	strain_sam	C57BL/6J
PRJNA478915	SRR7463903	65	222	strain_sam	C57BL/6J
PRJNA478915	SRR7463904	87	177	strain_sam	C57BL/6J
PRJNA478915	SRR7463906	84	197	strain_sam	C57BL/6J
PRJNA478915	SRR7463907	57	210	strain_sam	C57BL/6J
PRJNA478915	SRR7463908	53	173	strain_sam	C57BL/6J
PRJNA479694	SRR7471646	119	236	strain_background_sam_s_dpl381	C57BL/6J
PRJNA479694	SRR7471647	87	293	strain_background_sam_s_dpl381	C57BL/6J
PRJNA479694	SRR7471648	73	114	strain_background_sam_s_dpl381	C57BL/6J
PRJNA479694	SRR7471649	133	319	strain_background_sam_s_dpl381	C57BL/6J
PRJNA479694	SRR7471650	134	310	strain_background_sam_s_dpl381	C57BL/6J
PRJNA479694	SRR7471651	155	441	strain_background_sam_s_dpl381	C57BL/6J
PRJNA484226	SRR9029351	51	63	strain_sam	C57BL/6J
PRJNA484954	SRR7656037	16	44	strain_background_sam	C57BL/6J
PRJNA484954	SRR7656038	12	58	strain_background_sam	C57BL/6J
PRJNA484954	SRR7656039	22	48	strain_background_sam	C57BL/6J
PRJNA484954	SRR7656041	27	50	strain_background_sam	C57BL/6J
PRJNA484954	SRR7656042	38	85	strain_background_sam	C57BL/6J
PRJNA484954	SRR7656043	22	53	strain_background_sam	C57BL/6J
PRJNA484954	SRR7656044	33	58	strain_background_sam	C57BL/6J
PRJNA484954	SRR7656045	56	95	strain_background_sam	C57BL/6J
PRJNA484954	SRR7656046	33	52	strain_background_sam	C57BL/6J
PRJNA485966	SRR7692171	18	20	breed_sam	C57BL/6J
PRJNA485966	SRR7692172	14	17	breed_sam	C57BL/6J
PRJNA485966	SRR7692175	34	40	breed_sam	C57BL/6J
PRJNA485966	SRR7692176	47	88	breed_sam	C57BL/6J
PRJNA485966	SRR7692177	37	51	breed_sam	C57BL/6J
PRJNA485966	SRR7692178	57	59	breed_sam	C57BL/6J
PRJNA485966	SRR7692179	14	23	breed_sam	C57BL/6J
PRJNA485966	SRR7692180	26	59	breed_sam	C57BL/6J
PRJNA486361	SRR7703260	49	66	strain_sam	C57BL/6J
PRJNA486361	SRR7703261	45	94	strain_sam	C57BL/6J
PRJNA486361	SRR7703262	64	108	strain_sam	C57BL/6J
PRJNA486361	SRR7703263	42	55	strain_sam	C57BL/6J
PRJNA486361	SRR7703264	38	51	strain_sam	C57BL/6J
PRJNA486361	SRR7703265	47	101	strain_sam	C57BL/6J
PRJNA486361	SRR7703266	36	59	strain_sam	C57BL/6J
PRJNA486361	SRR7703267	34	64	strain_sam	C57BL/6J
PRJNA486361	SRR7703268	40	51	strain_sam	C57BL/6J
PRJNA486361	SRR7703269	51	86	strain_sam	C57BL/6J
PRJNA486361	SRR7703270	37	60	strain_sam	C57BL/6J
PRJNA486361	SRR7703271	16	31	strain_sam	C57BL/6J
PRJNA489253	SRR7782868	69	71	strain_sam	C57BL/6J
PRJNA489253	SRR7782874	77	134	strain_sam	C57BL/6J
PRJNA489253	SRR7782875	101	154	strain_sam	C57BL/6J
PRJNA489253	SRR7782876	87	179	strain_sam	C57BL/6J
PRJNA489274	SRR7784142	21	15	strain_sam	C57BL/6J
PRJNA489274	SRR7784143	28	38	strain_sam	C57BL/6J
PRJNA489274	SRR7784145	13	28	strain_sam	C57BL/6J
PRJNA489274	SRR7784146	14	20	strain_sam	C57BL/6J
PRJNA490645	SRR7882356	24	21	strain_sam	C57BL/6J
PRJNA490645	SRR7882358	18	29	strain_sam	C57BL/6J
PRJNA490645	SRR7882360	21	25	strain_sam	C57BL/6J
PRJNA491524	SRR7867183	199	634	strain_background_sam	C57BL/6J
PRJNA491524	SRR7867186	116	229	strain_background_sam	C57BL/6J
PRJNA491524	SRR7867189	203	230	strain_background_sam	C57BL/6J
PRJNA491524	SRR7867190	180	239	strain_background_sam	C57BL/6J
PRJNA493063	SRR7900010	27	28	strain_sam	C57BL/6J
PRJNA493063	SRR7900011	29	26	strain_sam	C57BL/6J
PRJNA493063	SRR7900014	10	18	strain_sam	C57BL/6J
PRJNA493063	SRR7900018	20	14	strain_sam	C57BL/6J
PRJNA493063	SRR7900019	13	14	strain_sam	C57BL/6J
PRJNA495161	SRR7984863	180	151	strain_sam	C57BL/6J
PRJNA495636	SRR7996764	35	21	strain_sam	C57BL/6J
PRJNA495636	SRR7996765	27	17	strain_sam	C57BL/6J
PRJNA495636	SRR7996766	19	13	strain_sam	C57BL/6J
PRJNA495636	SRR7996767	25	18	strain_sam	C57BL/6J
PRJNA495636	SRR7996769	30	43	strain_sam	C57BL/6J
PRJNA495636	SRR7996770	39	44	strain_sam	C57BL/6J
PRJNA498055	SRR8096091	12	20	strain_sam	C57BL/6J
PRJNA498055	SRR8096235	26	15	strain_sam	C57BL/6J
PRJNA498055	SRR8096236	29	23	strain_sam	C57BL/6J
PRJNA498055	SRR8096240	13	15	strain_sam	C57BL/6J
PRJNA498055	SRR8096242	32	15	strain_sam	C57BL/6J
PRJNA504028	SRR8165177	103	119	strain_sam	C57BL/6J
PRJNA506821	SRR8240814	130	153	strain_sam	C57BL/6J
PRJNA506821	SRR8240815	106	196	strain_sam	C57BL/6J
PRJNA506821	SRR8240816	109	141	strain_sam	C57BL/6J
PRJNA506821	SRR8240817	135	180	strain_sam	C57BL/6J
PRJNA511896	SRR8370617	40	103	strain_sam	C57BL/6J
PRJNA511896	SRR8370620	17	53	strain_sam	C57BL/6J
PRJNA511896	SRR8370621	23	69	strain_sam	C57BL/6J
PRJNA511896	SRR8370622	14	57	strain_sam	C57BL/6J
PRJNA511896	SRR8370623	17	79	strain_sam	C57BL/6J
PRJNA511896	SRR8370625	29	63	strain_sam	C57BL/6J
PRJNA511896	SRR8370626	18	47	strain_sam	C57BL/6J
PRJNA511896	SRR8370628	13	40	strain_sam	C57BL/6J
PRJNA511896	SRR8370638	10	15	strain_sam	C57BL/6J
PRJNA521043	SRR8534024	38	69	strain_sam	C57BL/6J
PRJNA521236	SRR8539945	28	118	strain_background_sam_s_dpl381	C57BL/6J
PRJNA521236	SRR8539947	67	386	strain_background_sam_s_dpl381	C57BL/6J
PRJNA521236	SRR8539949	15	100	strain_background_sam_s_dpl381	C57BL/6J
PRJNA521236	SRR8539951	49	396	strain_background_sam_s_dpl381	C57BL/6J
PRJNA521236	SRR8539953	58	400	strain_background_sam_s_dpl381	C57BL/6J
PRJNA521236	SRR8539955	46	323	strain_background_sam_s_dpl381	C57BL/6J
PRJNA521236	SRR8539957	17	121	strain_background_sam_s_dpl381	C57BL/6J
PRJNA521236	SRR8539959	39	389	strain_background_sam_s_dpl381	C57BL/6J
PRJNA521236	SRR8539963	24	111	strain_background_sam_s_dpl381	C57BL/6J
PRJNA521236	SRR8539965	63	501	strain_background_sam_s_dpl381	C57BL/6J
PRJNA521236	SRR8539969	65	393	strain_background_sam_s_dpl381	C57BL/6J
PRJNA521236	SRR8539971	39	112	strain_background_sam_s_dpl381	C57BL/6J
PRJNA521236	SRR8539973	75	426	strain_background_sam_s_dpl381	C57BL/6J
PRJNA521236	SRR8539975	30	108	strain_background_sam_s_dpl381	C57BL/6J
PRJNA521710	SRR8556684	31	30	strain_background_sam_s_dpl381	C57BL/6J
PRJNA521710	SRR8556686	19	36	strain_background_sam_s_dpl381	C57BL/6J
PRJNA521710	SRR8556688	27	19	strain_background_sam_s_dpl381	C57BL/6J
PRJNA521710	SRR8556690	10	10	strain_background_sam_s_dpl381	C57BL/6J
PRJNA521710	SRR8556692	18	20	strain_background_sam_s_dpl381	C57BL/6J
PRJNA522800	SRR8582895	24	60	strain_sam	C57BL/6J
PRJNA522800	SRR8582899	41	80	strain_sam	C57BL/6J
PRJNA522800	SRR8582900	28	61	strain_sam	C57BL/6J
PRJNA522800	SRR8582901	30	50	strain_sam	C57BL/6J
PRJNA522800	SRR8582902	50	56	strain_sam	C57BL/6J
PRJNA522800	SRR8582903	33	40	strain_sam	C57BL/6J
PRJNA522800	SRR8582904	48	99	strain_sam	C57BL/6J
PRJNA522800	SRR8582905	39	96	strain_sam	C57BL/6J
PRJNA522803	SRR8583000	36	42	strain_sam	C57BL/6J
PRJNA522803	SRR8583001	49	86	strain_sam	C57BL/6J
PRJNA522803	SRR8583002	47	82	strain_sam	C57BL/6J
PRJNA522803	SRR8583003	42	94	strain_sam	C57BL/6J
PRJNA522803	SRR8583004	60	76	strain_sam	C57BL/6J
PRJNA522803	SRR8583006	36	51	strain_sam	C57BL/6J
PRJNA522803	SRR8583007	47	115	strain_sam	C57BL/6J
PRJNA522803	SRR8583008	45	81	strain_sam	C57BL/6J
PRJNA522803	SRR8583009	32	91	strain_sam	C57BL/6J
PRJNA522803	SRR8583010	43	111	strain_sam	C57BL/6J
PRJNA522803	SRR8583011	20	52	strain_sam	C57BL/6J
PRJNA524289	SRR8653339	30	125	strain_sam	C57BL/6J
PRJNA524289	SRR8653357	33	126	strain_sam	C57BL/6J
PRJNA524289	SRR8653358	37	146	strain_sam	C57BL/6J
PRJNA525841	SRR8690203	46	83	strain_sam	C57BL/6J
PRJNA525992	SRR8695660	30	41	strain_background_sam_s_dpl381	C57BL/6J
PRJNA527156	SRR11744406	57	162	strain_sam	C57BL/6J
PRJNA527156	SRR11744407	67	126	strain_sam	C57BL/6J
PRJNA527156	SRR11744408	56	124	strain_sam	C57BL/6J
PRJNA527156	SRR11744409	74	117	strain_sam	C57BL/6J
PRJNA527156	SRR11744411	90	119	strain_sam	C57BL/6J
PRJNA527156	SRR11744416	51	100	strain_sam	C57BL/6J
PRJNA527156	SRR11744417	52	147	strain_sam	C57BL/6J
PRJNA527156	SRR11744418	71	202	strain_sam	C57BL/6J
PRJNA527156	SRR11744419	63	92	strain_sam	C57BL/6J
PRJNA527156	SRR11744421	78	122	strain_sam	C57BL/6J
PRJNA527156	SRR11744422	58	118	strain_sam	C57BL/6J
PRJNA527156	SRR11744423	70	65	strain_sam	C57BL/6J
PRJNA527156	SRR11744424	59	77	strain_sam	C57BL/6J
PRJNA527156	SRR11744425	63	78	strain_sam	C57BL/6J
PRJNA527156	SRR11744426	67	94	strain_sam	C57BL/6J
PRJNA527156	SRR11744432	45	132	strain_sam	C57BL/6J
PRJNA528435	SRR10067706	38	19	strain_sam	C57BL/6J
PRJNA528435	SRR10067707	58	29	strain_sam	C57BL/6J
PRJNA528435	SRR10067708	40	14	strain_sam	C57BL/6J
PRJNA528435	SRR10067709	33	17	strain_sam	C57BL/6J
PRJNA528435	SRR10067710	54	19	strain_sam	C57BL/6J
PRJNA528435	SRR10067711	56	18	strain_sam	C57BL/6J
PRJNA528435	SRR10067712	40	12	strain_sam	C57BL/6J
PRJNA528435	SRR10067713	49	16	strain_sam	C57BL/6J
PRJNA528435	SRR10067715	27	24	strain_sam	C57BL/6J
PRJNA528435	SRR8760378	39	42	strain_sam	C57BL/6J
PRJNA528435	SRR8760379	19	58	strain_sam	C57BL/6J
PRJNA528435	SRR8760380	23	26	strain_sam	C57BL/6J
PRJNA528435	SRR8760381	25	21	strain_sam	C57BL/6J
PRJNA528435	SRR8760382	19	19	strain_sam	C57BL/6J
PRJNA528662	SRR8776217	10	17	strain_background_sam	C57BL/6J
PRJNA529614	SRR8798832	19	575	strain_background_sam_s_dpl381	C57BL/6J
PRJNA529614	SRR8798833	11	474	strain_background_sam_s_dpl381	C57BL/6J
PRJNA529614	SRR8798839	23	360	strain_background_sam_s_dpl381	C57BL/6J
PRJNA529614	SRR8798840	24	388	strain_background_sam_s_dpl381	C57BL/6J
PRJNA529614	SRR8798841	49	350	strain_background_sam_s_dpl381	C57BL/6J
PRJNA529614	SRR8798842	60	357	strain_background_sam_s_dpl381	C57BL/6J
PRJNA529614	SRR8798843	24	301	strain_background_sam_s_dpl381	C57BL/6J
PRJNA529614	SRR8798844	39	473	strain_background_sam_s_dpl381	C57BL/6J
PRJNA529614	SRR8798845	42	378	strain_background_sam_s_dpl381	C57BL/6J
PRJNA529614	SRR8798846	28	200	strain_background_sam_s_dpl381	C57BL/6J
PRJNA529614	SRR8798847	19	442	strain_background_sam_s_dpl381	C57BL/6J
PRJNA529614	SRR8798848	32	305	strain_background_sam_s_dpl381	C57BL/6J
PRJNA529614	SRR8798850	31	305	strain_background_sam_s_dpl381	C57BL/6J
PRJNA529614	SRR8798851	30	433	strain_background_sam_s_dpl381	C57BL/6J
PRJNA529614	SRR8798852	25	356	strain_background_sam_s_dpl381	C57BL/6J
PRJNA529614	SRR8798854	23	349	strain_background_sam_s_dpl381	C57BL/6J
PRJNA529794	SRR8809619	37	35	strain_sam	C57BL/6J
PRJNA529794	SRR8809624	32	63	strain_sam	C57BL/6J
PRJNA529794	SRR8809643	28	17	strain_sam	C57BL/6J
PRJNA531378	SRR8863824	20	90	strain_sam	C57BL/6J
PRJNA531378	SRR8863832	11	44	strain_sam	C57BL/6J
PRJNA531378	SRR8863833	15	72	strain_sam	C57BL/6J
PRJNA531378	SRR8863834	12	44	strain_sam	C57BL/6J
PRJNA531378	SRR8863836	15	75	strain_sam	C57BL/6J
PRJNA542823	SRR9054053	194	189	strain_sam	C57BL/6J
PRJNA542823	SRR9054054	205	188	strain_sam	C57BL/6J
PRJNA542823	SRR9054055	197	200	strain_sam	C57BL/6J
PRJNA542823	SRR9054058	294	394	strain_sam	C57BL/6J
PRJNA542823	SRR9054059	292	403	strain_sam	C57BL/6J
PRJNA542823	SRR9054060	197	61	strain_sam	C57BL/6J
PRJNA542823	SRR9054061	215	64	strain_sam	C57BL/6J
PRJNA542823	SRR9054062	209	258	strain_sam	C57BL/6J
PRJNA542823	SRR9054063	243	228	strain_sam	C57BL/6J
PRJNA542823	SRR9054064	237	288	strain_sam	C57BL/6J
PRJNA542823	SRR9054065	262	312	strain_sam	C57BL/6J
PRJNA542823	SRR9054066	163	136	strain_sam	C57BL/6J
PRJNA542823	SRR9054067	148	141	strain_sam	C57BL/6J
PRJNA542877	SRR9054201	51	91	strain_sam	C57BL/6J
PRJNA542877	SRR9054202	34	68	strain_sam	C57BL/6J
PRJNA542877	SRR9054203	51	70	strain_sam	C57BL/6J
PRJNA542877	SRR9054204	33	55	strain_sam	C57BL/6J
PRJNA542877	SRR9054205	31	60	strain_sam	C57BL/6J
PRJNA542877	SRR9054206	32	37	strain_sam	C57BL/6J
PRJNA542877	SRR9054207	34	74	strain_sam	C57BL/6J
PRJNA542877	SRR9054208	32	83	strain_sam	C57BL/6J
PRJNA542877	SRR9054209	31	66	strain_sam	C57BL/6J
PRJNA542877	SRR9054210	35	59	strain_sam	C57BL/6J
PRJNA542877	SRR9054211	20	60	strain_sam	C57BL/6J
PRJNA542877	SRR9054212	25	41	strain_sam	C57BL/6J
PRJNA542877	SRR9054213	34	64	strain_sam	C57BL/6J
PRJNA542877	SRR9054214	31	44	strain_sam	C57BL/6J
PRJNA542877	SRR9054219	18	31	strain_sam	C57BL/6J
PRJNA542877	SRR9054220	20	52	strain_sam	C57BL/6J
PRJNA542877	SRR9054221	39	61	strain_sam	C57BL/6J
PRJNA542877	SRR9054222	36	80	strain_sam	C57BL/6J
PRJNA542877	SRR9054223	33	66	strain_sam	C57BL/6J
PRJNA542877	SRR9054224	36	62	strain_sam	C57BL/6J
PRJNA550114	SRR9409783	14	55	strain_sam	C57BL/6J
PRJNA550114	SRR9409784	18	19	strain_sam	C57BL/6J
PRJNA550114	SRR9409785	17	43	strain_sam	C57BL/6J
PRJNA550114	SRR9409786	37	125	strain_sam	C57BL/6J
PRJNA550114	SRR9409787	26	81	strain_sam	C57BL/6J
PRJNA550114	SRR9409788	24	43	strain_sam	C57BL/6J
PRJNA550114	SRR9409789	21	64	strain_sam	C57BL/6J
PRJNA550114	SRR9409790	14	45	strain_sam	C57BL/6J
PRJNA550114	SRR9409792	12	21	strain_sam	C57BL/6J
PRJNA550114	SRR9409793	16	44	strain_sam	C57BL/6J
PRJNA550114	SRR9409794	15	25	strain_sam	C57BL/6J
PRJNA552031	SRR9622648	109	167	background_strain_sam_s_dpl78	C57BL/6J
PRJNA552031	SRR9622649	92	189	background_strain_sam_s_dpl78	C57BL/6J
PRJNA552031	SRR9622652	99	104	background_strain_sam_s_dpl78	C57BL/6J
PRJNA552031	SRR9622653	83	117	background_strain_sam_s_dpl78	C57BL/6J
PRJNA552031	SRR9622654	55	124	background_strain_sam_s_dpl78	C57BL/6J
PRJNA552031	SRR9622656	89	196	background_strain_sam_s_dpl78	C57BL/6J
PRJNA552031	SRR9622657	95	193	background_strain_sam_s_dpl78	C57BL/6J
PRJNA552845	SRR9646310	13	27	genetic_background_sam	C57BL/6J
PRJNA552845	SRR9646314	14	24	genetic_background_sam	C57BL/6J
PRJNA552845	SRR9646316	18	21	genetic_background_sam	C57BL/6J
PRJNA552845	SRR9646320	33	24	genetic_background_sam	C57BL/6J
PRJNA553290	SRR9656898	84	95	strain_sam	C57BL/6J
PRJNA553290	SRR9656902	41	48	strain_sam	C57BL/6J
PRJNA553290	SRR9656906	74	38	strain_sam	C57BL/6J
PRJNA553290	SRR9656910	47	44	strain_sam	C57BL/6J
PRJNA553290	SRR9656926	67	72	strain_sam	C57BL/6J
PRJNA553290	SRR9656930	53	57	strain_sam	C57BL/6J
PRJNA553290	SRR9656934	40	32	strain_sam	C57BL/6J
PRJNA553290	SRR9656938	37	43	strain_sam	C57BL/6J
PRJNA554357	SRR9677269	12	16	strain_sam	C57BL/6J
PRJNA556004	SRR11256301	20	41	strain_sam	C57BL/6J
PRJNA557653	SRR9867802	171	300	strain_background_sam_s_dpl381	C57BL/6J
PRJNA563863	SRR10066412	12	22	strain_sam	C57BL/6J
PRJNA563863	SRR10066450	11	16	strain_sam	C57BL/6J
PRJNA563863	SRR10066451	10	11	strain_sam	C57BL/6J
PRJNA563863	SRR10066455	19	17	strain_sam	C57BL/6J
PRJNA563863	SRR10066466	15	37	strain_sam	C57BL/6J
PRJNA563863	SRR10066467	15	20	strain_sam	C57BL/6J
PRJNA563889	SRR10067595	50	46	strain_sam	C57BL/6J
PRJNA563889	SRR10067596	15	23	strain_sam	C57BL/6J
PRJNA563889	SRR10067597	48	57	strain_sam	C57BL/6J
PRJNA563889	SRR10067598	57	46	strain_sam	C57BL/6J
PRJNA563889	SRR10067599	21	28	strain_sam	C57BL/6J
PRJNA563889	SRR10067600	21	34	strain_sam	C57BL/6J
PRJNA563889	SRR10067602	13	14	strain_sam	C57BL/6J
PRJNA563889	SRR10067610	55	82	strain_sam	C57BL/6J
PRJNA563889	SRR10067611	48	73	strain_sam	C57BL/6J
PRJNA563889	SRR10067612	89	124	strain_sam	C57BL/6J
PRJNA563889	SRR10067613	69	102	strain_sam	C57BL/6J
PRJNA563889	SRR10067614	49	61	strain_sam	C57BL/6J
PRJNA563889	SRR10067615	33	56	strain_sam	C57BL/6J
PRJNA563889	SRR10067617	67	89	strain_sam	C57BL/6J
PRJNA662247	SRR12606788	29	99	strain_sam	C57BL/6J
PRJNA662247	SRR12606789	19	53	strain_sam	C57BL/6J
PRJNA662247	SRR12606790	19	89	strain_sam	C57BL/6J
PRJNA662247	SRR12606795	26	123	strain_sam	C57BL/6J
PRJNA662247	SRR12606796	27	123	strain_sam	C57BL/6J
PRJNA662247	SRR12606797	22	141	strain_sam	C57BL/6J
PRJNA662247	SRR12606803	25	63	strain_sam	C57BL/6J
PRJNA662247	SRR12606804	28	62	strain_sam	C57BL/6J
PRJNA662247	SRR12606809	61	173	strain_sam	C57BL/6J
PRJNA662247	SRR12606811	49	154	strain_sam	C57BL/6J

## Sheet: b 6J SRA runs with no exon 9 
Bioproject	Run Accession	Nnt exon 2 reads	Nnt exon 9 reads	Attributes.key	Attributes.value
PRJDB10114	DRR235168	13	0	strain_sam	C57BL/6J
PRJDB10114	DRR235171	40	0	strain_sam	C57BL/6J
PRJDB10114	DRR235172	36	0	strain_sam	C57BL/6J
PRJDB10114	DRR235173	42	0	strain_sam	C57BL/6J
PRJDB10114	DRR235176	29	0	strain_sam	C57BL/6J
PRJDB10114	DRR235178	35	0	strain_sam	C57BL/6J
PRJDB10114	DRR235180	29	0	strain_sam	C57BL/6J
PRJDB10114	DRR235181	37	0	strain_sam	C57BL/6J
PRJDB10114	DRR235183	47	0	strain_sam	C57BL/6J
PRJDB10114	DRR235186	25	0	strain_sam	C57BL/6J
PRJDB2805	DRR013083	30	0	strain_sam	C57BL/6J
PRJDB2805	DRR013084	25	0	strain_sam	C57BL/6J
PRJDB2805	DRR013085	34	0	strain_sam	C57BL/6J
PRJDB2805	DRR013086	30	0	strain_sam	C57BL/6J
PRJDB2805	DRR013087	20	0	strain_sam	C57BL/6J
PRJDB2805	DRR013089	22	0	strain_sam	C57BL/6J
PRJDB2805	DRR013082	35	0	strain_sam	C57BL/6J
PRJDB2805	DRR013088	24	0	strain_sam	C57BL/6J
PRJDB5523	DRR086996	45	0	strain_sam	C57BL/6J
PRJDB5523	DRR086997	39	0	strain_sam	C57BL/6J
PRJDB5523	DRR086999	59	0	strain_sam	C57BL/6J
PRJDB5523	DRR087000	60	0	strain_sam	C57BL/6J
PRJDB5523	DRR086995	88	0	strain_sam	C57BL/6J
PRJDB5523	DRR086998	115	0	strain_sam	C57BL/6J
PRJDB5724	DRR091074	78	0	strain_sam	C57BL/6J
PRJDB5724	DRR091099	124	0	strain_sam	C57BL/6J
PRJDB5724	DRR091100	119	0	strain_sam	C57BL/6J
PRJDB5724	DRR091103	101	0	strain_sam	C57BL/6J
PRJDB5724	DRR091104	122	0	strain_sam	C57BL/6J
PRJDB5724	DRR091105	80	0	strain_sam	C57BL/6J
PRJDB5724	DRR091125	102	0	strain_sam	C57BL/6J
PRJDB5724	DRR091130	71	0	strain_sam	C57BL/6J
PRJDB5724	DRR091131	51	0	strain_sam	C57BL/6J
PRJDB5724	DRR091133	120	0	strain_sam	C57BL/6J
PRJDB5724	DRR091091	112	0	strain_sam	C57BL/6J
PRJDB5724	DRR091126	195	0	strain_sam	C57BL/6J
PRJDB5724	DRR091132	119	0	strain_sam	C57BL/6J
PRJDB5724	DRR091137	71	0	strain_sam	C57BL/6J
PRJDB5953	DRR106485	51	0	strain_sam	C57BL/6J
PRJDB5953	DRR106486	48	0	strain_sam	C57BL/6J
PRJDB5953	DRR106487	27	0	strain_sam	C57BL/6J
PRJDB5953	DRR106488	52	0	strain_sam	C57BL/6J
PRJDB5953	DRR106489	49	0	strain_sam	C57BL/6J
PRJDB5953	DRR106490	72	0	strain_sam	C57BL/6J
PRJDB5953	DRR106491	61	0	strain_sam	C57BL/6J
PRJDB5953	DRR106492	75	0	strain_sam	C57BL/6J
PRJDB7636	DRR159335	13	0	strain_sam	C57BL/6J
PRJDB7636	DRR159346	11	0	strain_sam	C57BL/6J
PRJDB7749	DRR163656	33	0	strain_sam	C57BL/6J
PRJDB7749	DRR163657	34	0	strain_sam	C57BL/6J
PRJDB7749	DRR163658	41	0	strain_sam	C57BL/6J
PRJDB7781	DRR162412	18	0	strain_sam	C57BL/6J
PRJDB7781	DRR162413	18	0	strain_sam	C57BL/6J
PRJDB8384	DRR180074	96	0	strain_sam	C57BL/6J
PRJDB8384	DRR180078	61	0	strain_sam	C57BL/6J
PRJDB8384	DRR180080	74	0	strain_sam	C57BL/6J
PRJDB8384	DRR180073	103	0	strain_sam	C57BL/6J
PRJDB8384	DRR180076	97	0	strain_sam	C57BL/6J
PRJDB8384	DRR180077	82	0	strain_sam	C57BL/6J
PRJDB8384	DRR180079	71	0	strain_sam	C57BL/6J
PRJDB9434	DRR213888	352	0	strain_sam	C57BL/6J
PRJDB9434	DRR213889	289	0	strain_sam	C57BL/6J
PRJDB9434	DRR213890	251	0	strain_sam	C57BL/6J
PRJDB9434	DRR213891	263	0	strain_sam	C57BL/6J
PRJDB9434	DRR213892	244	0	strain_sam	C57BL/6J
PRJDB9434	DRR213893	300	0	strain_sam	C57BL/6J
PRJDB9434	DRR213894	243	0	strain_sam	C57BL/6J
PRJDB9434	DRR213895	301	0	strain_sam	C57BL/6J
PRJDB9434	DRR213897	275	0	strain_sam	C57BL/6J
PRJDB9434	DRR213898	287	0	strain_sam	C57BL/6J
PRJDB9434	DRR213887	305	0	strain_sam	C57BL/6J
PRJDB9434	DRR213896	293	0	strain_sam	C57BL/6J
PRJEB14390	ERR1450553	15	0	strain_sam	C57BL/6J
PRJEB14390	ERR1450554	18	0	strain_sam	C57BL/6J
PRJEB14390	ERR1450556	14	0	strain_sam	C57BL/6J
PRJEB14447	ERR1457362	20	0	strain_sam	C57BL/6J
PRJEB14447	ERR1457358	29	0	strain_sam	C57BL/6J
PRJEB14447	ERR1457360	36	0	strain_sam	C57BL/6J
PRJEB14447	ERR1457365	27	0	strain_sam	C57BL/6J
PRJEB22238	ERR2099825	11	0	strain_sam	C57BL/6J
PRJEB22238	ERR2099827	10	0	strain_sam	C57BL/6J
PRJEB22238	ERR2099824	12	0	strain_sam	C57BL/6J
PRJEB22693	ERR2130614	25	0	strain_sam	C57BL/6J
PRJEB22693	ERR2130615	31	0	strain_sam	C57BL/6J
PRJEB22693	ERR2130617	19	0	strain_sam	C57BL/6J
PRJEB22693	ERR2130619	32	0	strain_sam	C57BL/6J
PRJEB22693	ERR2130620	24	0	strain_sam	C57BL/6J
PRJEB22693	ERR2130622	17	0	strain_sam	C57BL/6J
PRJEB22693	ERR2130623	21	0	strain_sam	C57BL/6J
PRJEB22693	ERR2130624	29	0	strain_sam	C57BL/6J
PRJEB22693	ERR2130629	10	0	strain_sam	C57BL/6J
PRJEB22693	ERR2130632	27	0	strain_sam	C57BL/6J
PRJEB22693	ERR2130633	22	0	strain_sam	C57BL/6J
PRJEB22693	ERR2130636	178	0	strain_sam	C57BL/6J
PRJEB22693	ERR2130637	25	0	strain_sam	C57BL/6J
PRJEB22693	ERR2130638	39	0	strain_sam	C57BL/6J
PRJEB22693	ERR2130645	14	0	strain_sam	C57BL/6J
PRJEB22693	ERR2130647	65	0	strain_sam	C57BL/6J
PRJEB22693	ERR2130648	49	0	strain_sam	C57BL/6J
PRJEB22693	ERR2130649	42	0	strain_sam	C57BL/6J
PRJEB22693	ERR2130650	39	0	strain_sam	C57BL/6J
PRJEB22693	ERR2130651	27	0	strain_sam	C57BL/6J
PRJEB22693	ERR2130616	16	0	strain_sam	C57BL/6J
PRJEB22693	ERR2130618	20	0	strain_sam	C57BL/6J
PRJEB22693	ERR2130625	22	0	strain_sam	C57BL/6J
PRJEB22693	ERR2130626	426	0	strain_sam	C57BL/6J
PRJEB22693	ERR2130627	537	0	strain_sam	C57BL/6J
PRJEB22693	ERR2130628	23	0	strain_sam	C57BL/6J
PRJEB22693	ERR2130630	18	0	strain_sam	C57BL/6J
PRJEB22693	ERR2130631	30	0	strain_sam	C57BL/6J
PRJEB22693	ERR2130634	123	0	strain_sam	C57BL/6J
PRJEB22693	ERR2130635	155	0	strain_sam	C57BL/6J
PRJEB22693	ERR2130639	10	0	strain_sam	C57BL/6J
PRJEB22693	ERR2130646	59	0	strain_sam	C57BL/6J
PRJEB23883	ERR2217414	11	0	strain_sam	C57BL/6J
PRJEB23883	ERR2217450	11	0	strain_sam	C57BL/6J
PRJEB23883	ERR2217474	10	0	strain_sam	C57BL/6J
PRJEB23883	ERR2217486	22	0	strain_sam	C57BL/6J
PRJEB23883	ERR2217492	11	0	strain_sam	C57BL/6J
PRJEB23883	ERR2217504	10	0	strain_sam	C57BL/6J
PRJEB23883	ERR2217510	14	0	strain_sam	C57BL/6J
PRJEB23883	ERR2217522	24	0	strain_sam	C57BL/6J
PRJEB23883	ERR2217528	15	0	strain_sam	C57BL/6J
PRJEB23883	ERR2217534	12	0	strain_sam	C57BL/6J
PRJEB23883	ERR2217540	14	0	strain_sam	C57BL/6J
PRJEB23883	ERR2217546	10	0	strain_sam	C57BL/6J
PRJEB23883	ERR2217564	18	0	strain_sam	C57BL/6J
PRJEB23883	ERR2217594	12	0	strain_sam	C57BL/6J
PRJEB23883	ERR2217606	15	0	strain_sam	C57BL/6J
PRJEB23883	ERR2217642	11	0	strain_sam	C57BL/6J
PRJEB23883	ERR2217672	17	0	strain_sam	C57BL/6J
PRJEB23883	ERR2217684	14	0	strain_sam	C57BL/6J
PRJEB23883	ERR2217690	12	0	strain_sam	C57BL/6J
PRJEB23883	ERR2217726	18	0	strain_sam	C57BL/6J
PRJEB23883	ERR2217732	12	0	strain_sam	C57BL/6J
PRJEB23883	ERR2217738	12	0	strain_sam	C57BL/6J
PRJEB23917	ERR2219972	103	0	strain_sam	C57BL/6J
PRJEB24979	ERR2303736	36	0	strain_sam	C57BL/6J
PRJEB24979	ERR2303737	102	0	strain_sam	C57BL/6J
PRJEB24979	ERR2303738	72	0	strain_sam	C57BL/6J
PRJEB24979	ERR2303739	83	0	strain_sam	C57BL/6J
PRJEB24979	ERR2303740	54	0	strain_sam	C57BL/6J
PRJEB24979	ERR2303741	72	0	strain_sam	C57BL/6J
PRJEB24979	ERR2303742	77	0	strain_sam	C57BL/6J
PRJEB24979	ERR2303743	88	0	strain_sam	C57BL/6J
PRJEB24979	ERR2303744	78	0	strain_sam	C57BL/6J
PRJEB27175	ERR2617658	25	0	strain_sam	C57BL/6J
PRJEB27175	ERR2617647	24	0	strain_sam	C57BL/6J
PRJEB27404	ERR2654301	30	0	strain_sam	C57BL/6J
PRJEB27404	ERR2654304	23	0	strain_sam	C57BL/6J
PRJEB27404	ERR2654310	17	0	strain_sam	C57BL/6J
PRJEB27404	ERR2654322	14	0	strain_sam	C57BL/6J
PRJEB27404	ERR2654325	13	0	strain_sam	C57BL/6J
PRJEB27404	ERR2654328	18	0	strain_sam	C57BL/6J
PRJEB27404	ERR2654334	16	0	strain_sam	C57BL/6J
PRJEB27404	ERR2654340	32	0	strain_sam	C57BL/6J
PRJEB27404	ERR2654343	35	0	strain_sam	C57BL/6J
PRJEB27404	ERR2654346	47	0	strain_sam	C57BL/6J
PRJEB27404	ERR2654349	69	0	strain_sam	C57BL/6J
PRJEB27404	ERR2654352	47	0	strain_sam	C57BL/6J
PRJEB27404	ERR2654355	44	0	strain_sam	C57BL/6J
PRJEB27404	ERR2654361	51	0	strain_sam	C57BL/6J
PRJEB27404	ERR2654379	83	0	strain_sam	C57BL/6J
PRJEB27404	ERR2654385	27	0	strain_sam	C57BL/6J
PRJEB27404	ERR2654388	54	0	strain_sam	C57BL/6J
PRJEB27404	ERR2654307	22	0	strain_sam	C57BL/6J
PRJEB27404	ERR2654316	11	0	strain_sam	C57BL/6J
PRJEB27404	ERR2654337	27	0	strain_sam	C57BL/6J
PRJEB27404	ERR2654358	29	0	strain_sam	C57BL/6J
PRJEB27404	ERR2654364	37	0	strain_sam	C57BL/6J
PRJEB27404	ERR2654367	40	0	strain_sam	C57BL/6J
PRJEB27404	ERR2654370	43	0	strain_sam	C57BL/6J
PRJEB27404	ERR2654373	33	0	strain_sam	C57BL/6J
PRJEB27404	ERR2654376	39	0	strain_sam	C57BL/6J
PRJEB27404	ERR2654382	29	0	strain_sam	C57BL/6J
PRJEB28128	ERR2730407	13	0	strain_sam	C57BL/6J
PRJEB28128	ERR2730409	13	0	strain_sam	C57BL/6J
PRJEB28360	ERR2755772	25	0	strain_sam	C57BL/6J
PRJEB28360	ERR2755773	24	0	strain_sam	C57BL/6J
PRJEB28443	ERR2767192	14	0	strain_sam	C57BL/6J
PRJEB28443	ERR2767195	13	0	strain_sam	C57BL/6J
PRJEB28443	ERR2767206	30	0	strain_sam	C57BL/6J
PRJEB28443	ERR2767208	11	0	strain_sam	C57BL/6J
PRJEB28443	ERR2767213	12	0	strain_sam	C57BL/6J
PRJEB28443	ERR2767216	12	0	strain_sam	C57BL/6J
PRJEB28443	ERR2767225	59	0	strain_sam	C57BL/6J
PRJEB28443	ERR2767226	86	0	strain_sam	C57BL/6J
PRJEB28443	ERR2767203	83	0	strain_sam	C57BL/6J
PRJEB28443	ERR2767209	34	0	strain_sam	C57BL/6J
PRJEB28443	ERR2767211	31	0	strain_sam	C57BL/6J
PRJEB28443	ERR2767212	13	0	strain_sam	C57BL/6J
PRJEB28443	ERR2767222	20	0	strain_sam	C57BL/6J
PRJEB28443	ERR2767224	39	0	strain_sam	C57BL/6J
PRJEB28777	ERR2811695	27	0	strain_sam	C57BL/6J
PRJEB28777	ERR2811707	25	0	strain_sam	C57BL/6J
PRJEB28777	ERR2811691	13	0	strain_sam	C57BL/6J
PRJEB30085	ERR2983172	58	0	strain_sam	C57BL/6J
PRJEB30085	ERR2983173	70	0	strain_sam	C57BL/6J
PRJEB30085	ERR2983174	51	0	strain_sam	C57BL/6J
PRJEB30085	ERR2983176	64	0	strain_sam	C57BL/6J
PRJEB30758	ERR3048432	30	0	strain_sam	C57BL/6J
PRJEB30758	ERR3048433	12	0	strain_sam	C57BL/6J
PRJEB30758	ERR3048434	27	0	strain_sam	C57BL/6J
PRJEB31165	ERR3148570	13	0	strain_sam	C57BL/6J
PRJEB31165	ERR3148576	10	0	strain_sam	C57BL/6J
PRJEB31165	ERR3148579	14	0	strain_sam	C57BL/6J
PRJEB31165	ERR3148587	11	0	strain_sam	C57BL/6J
PRJEB31165	ERR3148590	10	0	strain_sam	C57BL/6J
PRJEB31165	ERR3148603	13	0	strain_sam	C57BL/6J
PRJEB31165	ERR3148574	10	0	strain_sam	C57BL/6J
PRJEB31165	ERR3148575	11	0	strain_sam	C57BL/6J
PRJEB31165	ERR3148582	13	0	strain_sam	C57BL/6J
PRJEB31165	ERR3148592	15	0	strain_sam	C57BL/6J
PRJEB31165	ERR3148609	11	0	strain_sam	C57BL/6J
PRJEB31165	ERR3148611	22	0	strain_sam	C57BL/6J
PRJEB31165	ERR3148612	13	0	strain_sam	C57BL/6J
PRJEB31769	ERR3233429	24	0	strain_sam	C57BL/6J
PRJEB32475	ERR3316223	22	0	strain_sam	C57BL/6J
PRJEB32475	ERR3316237	18	0	strain_sam	C57BL/6J
PRJEB32475	ERR3316225	37	0	strain_sam	C57BL/6J
PRJEB32475	ERR3316236	15	0	strain_sam	C57BL/6J
PRJEB32950	ERR3365698	21	0	strain_sam	C57BL/6J
PRJEB32950	ERR3365791	11	0	strain_sam	C57BL/6J
PRJEB32950	ERR3365606	14	0	strain_sam	C57BL/6J
PRJEB32950	ERR3365609	20	0	strain_sam	C57BL/6J
PRJEB32950	ERR3365696	33	0	strain_sam	C57BL/6J
PRJEB32950	ERR3365699	32	0	strain_sam	C57BL/6J
PRJEB32959	ERR3365988	16	0	strain_sam	C57BL/6J
PRJEB32959	ERR3365981	35	0	strain_sam	C57BL/6J
PRJEB32959	ERR3365984	15	0	strain_sam	C57BL/6J
PRJEB33452	ERR3427763	43	0	strain_sam	C57BL/6J
PRJEB33452	ERR3427783	11	0	strain_sam	C57BL/6J
PRJEB33452	ERR3427785	55	0	strain_sam	C57BL/6J
PRJEB33452	ERR3427784	11	0	strain_sam	C57BL/6J
PRJEB34414	ERR3519604	19	0	strain_sam	C57BL/6J
PRJEB34414	ERR3519607	16	0	strain_sam	C57BL/6J
PRJEB34414	ERR3519608	23	0	strain_sam	C57BL/6J
PRJEB34414	ERR3519609	23	0	strain_sam	C57BL/6J
PRJEB34414	ERR3519611	13	0	strain_sam	C57BL/6J
PRJEB34414	ERR3519612	15	0	strain_sam	C57BL/6J
PRJEB34414	ERR3519613	13	0	strain_sam	C57BL/6J
PRJEB34414	ERR3519614	14	0	strain_sam	C57BL/6J
PRJEB34414	ERR3519615	23	0	strain_sam	C57BL/6J
PRJEB34414	ERR3519616	16	0	strain_sam	C57BL/6J
PRJEB34414	ERR3519617	13	0	strain_sam	C57BL/6J
PRJEB34414	ERR3519618	13	0	strain_sam	C57BL/6J
PRJEB34414	ERR3519619	19	0	strain_sam	C57BL/6J
PRJEB34414	ERR3519620	20	0	strain_sam	C57BL/6J
PRJEB34414	ERR3519621	17	0	strain_sam	C57BL/6J
PRJEB34414	ERR3519622	26	0	strain_sam	C57BL/6J
PRJEB34414	ERR3519577	13	0	strain_sam	C57BL/6J
PRJEB34414	ERR3519578	21	0	strain_sam	C57BL/6J
PRJEB34414	ERR3519580	31	0	strain_sam	C57BL/6J
PRJEB34414	ERR3519583	20	0	strain_sam	C57BL/6J
PRJEB34414	ERR3519584	23	0	strain_sam	C57BL/6J
PRJEB34414	ERR3519606	16	0	strain_sam	C57BL/6J
PRJEB34414	ERR3519610	17	0	strain_sam	C57BL/6J
PRJEB35731	ERR3721854	66	0	strain_sam	C57BL/6J
PRJEB35731	ERR3721855	70	0	strain_sam	C57BL/6J
PRJEB35731	ERR3721856	92	0	strain_sam	C57BL/6J
PRJEB35731	ERR3721857	30	0	strain_sam	C57BL/6J
PRJEB35731	ERR3721862	21	0	strain_sam	C57BL/6J
PRJEB35731	ERR3721858	35	0	strain_sam	C57BL/6J
PRJEB35731	ERR3721859	38	0	strain_sam	C57BL/6J
PRJEB35731	ERR3721860	36	0	strain_sam	C57BL/6J
PRJEB35731	ERR3721861	31	0	strain_sam	C57BL/6J
PRJEB35921	ERR3773508	34	0	strain_sam	C57BL/6J
PRJEB35921	ERR3773512	22	0	strain_sam	C57BL/6J
PRJEB35921	ERR3773542	31	0	strain_sam	C57BL/6J
PRJEB35921	ERR3773505	13	0	strain_sam	C57BL/6J
PRJEB35921	ERR3773514	25	0	strain_sam	C57BL/6J
PRJEB35921	ERR3773516	28	0	strain_sam	C57BL/6J
PRJEB35921	ERR3773527	11	0	strain_sam	C57BL/6J
PRJEB35921	ERR3773529	23	0	strain_sam	C57BL/6J
PRJEB38394	ERR4164709	10	0	strain_sam	C57BL/6J
PRJEB39117	ERR4299228	119	0	strain_sam	C57BL/6J
PRJEB39117	ERR4299257	88	0	strain_sam	C57BL/6J
PRJEB39117	ERR4299379	74	0	strain_sam	C57BL/6J
PRJEB39117	ERR4299395	74	0	strain_sam	C57BL/6J
PRJEB39117	ERR4299396	64	0	strain_sam	C57BL/6J
PRJEB39117	ERR4299399	70	0	strain_sam	C57BL/6J
PRJEB39117	ERR4299400	38	0	strain_sam	C57BL/6J
PRJEB39117	ERR4299412	45	0	strain_sam	C57BL/6J
PRJEB39117	ERR4299436	79	0	strain_sam	C57BL/6J
PRJEB39117	ERR4299447	56	0	strain_sam	C57BL/6J
PRJEB39117	ERR4299486	64	0	strain_sam	C57BL/6J
PRJEB39117	ERR4299489	17	0	strain_sam	C57BL/6J
PRJEB39117	ERR4299492	50	0	strain_sam	C57BL/6J
PRJEB39117	ERR4299524	74	0	strain_sam	C57BL/6J
PRJEB39117	ERR4299530	25	0	strain_sam	C57BL/6J
PRJEB39117	ERR4299562	36	0	strain_sam	C57BL/6J
PRJEB39117	ERR4299575	37	0	strain_sam	C57BL/6J
PRJEB39117	ERR4299585	93	0	strain_sam	C57BL/6J
PRJEB39117	ERR4299636	232	0	strain_sam	C57BL/6J
PRJEB39117	ERR4299638	96	0	strain_sam	C57BL/6J
PRJEB39117	ERR4299403	69	0	strain_sam	C57BL/6J
PRJEB39117	ERR4299491	90	0	strain_sam	C57BL/6J
PRJEB39117	ERR4299518	26	0	strain_sam	C57BL/6J
PRJEB39117	ERR4299564	138	0	strain_sam	C57BL/6J
PRJEB9114	ERR1024513	65	0	strain_sam	C57BL/6J
PRJNA144639	SRR309257	40	0	strain_sam	C57BL/6J
PRJNA144639	SRR309259	66	0	strain_sam	C57BL/6J
PRJNA144639	SRR309260	31	0	strain_sam	C57BL/6J
PRJNA148973	SRR359854	10	0	strain_sam	C57BL/6J
PRJNA148973	SRR359858	18	0	strain_sam	C57BL/6J
PRJNA148973	SRR359860	13	0	strain_sam	C57BL/6J
PRJNA167280	SRR499921	25	0	strain_sam	C57BL/6J
PRJNA167280	SRR499922	27	0	strain_sam	C57BL/6J
PRJNA168144	SRR504772	14	0	strain_sam	C57BL/6J
PRJNA196832	SRR825224	20	0	strain_sam	C57BL/6J
PRJNA196832	SRR825225	22	0	strain_sam	C57BL/6J
PRJNA196832	SRR825226	49	0	strain_sam	C57BL/6J
PRJNA196832	SRR825227	38	0	strain_sam	C57BL/6J
PRJNA196832	SRR825228	63	0	strain_sam	C57BL/6J
PRJNA196832	SRR825230	39	0	strain_sam	C57BL/6J
PRJNA196832	SRR825231	34	0	strain_sam	C57BL/6J
PRJNA196894	SRR826316	48	0	strain_sam	C57BL/6J
PRJNA196894	SRR826317	20	0	strain_sam	C57BL/6J
PRJNA196894	SRR826318	29	0	strain_sam	C57BL/6J
PRJNA196894	SRR826319	23	0	strain_sam	C57BL/6J
PRJNA196894	SRR826320	48	0	strain_sam	C57BL/6J
PRJNA196894	SRR826321	38	0	strain_sam	C57BL/6J
PRJNA196894	SRR826322	37	0	strain_sam	C57BL/6J
PRJNA196894	SRR826323	26	0	strain_sam	C57BL/6J
PRJNA196894	SRR826324	32	0	strain_sam	C57BL/6J
PRJNA196894	SRR826325	25	0	strain_sam	C57BL/6J
PRJNA196894	SRR826326	23	0	strain_sam	C57BL/6J
PRJNA196894	SRR826328	35	0	strain_sam	C57BL/6J
PRJNA196894	SRR826329	29	0	strain_sam	C57BL/6J
PRJNA196894	SRR826330	28	0	strain_sam	C57BL/6J
PRJNA196894	SRR826331	30	0	strain_sam	C57BL/6J
PRJNA208469	SRR901045	105	0	strain_sam	C57BL/6J
PRJNA208469	SRR901047	14	0	strain_sam	C57BL/6J
PRJNA209992	SRR923947	63	0	strain_sam	C57BL/6J
PRJNA209992	SRR923944	23	0	strain_sam	C57BL/6J
PRJNA209992	SRR923946	15	0	strain_sam	C57BL/6J
PRJNA212500	SRR940244	14	0	strain_sam	C57BL/6J
PRJNA217199	SRR957326	28	0	strain_background_sam	C57BL/6J
PRJNA217199	SRR957327	17	0	strain_background_sam	C57BL/6J
PRJNA217199	SRR957328	37	0	strain_background_sam	C57BL/6J
PRJNA217515	SRR959579	47	0	strain_background_sam	C57BL/6J
PRJNA217515	SRR959580	35	0	strain_background_sam	C57BL/6J
PRJNA217515	SRR959581	54	0	strain_background_sam	C57BL/6J
PRJNA229411	SRR1033855	66	0	strain_sam	C57BL/6J
PRJNA229411	SRR1033935	11	0	strain_sam	C57BL/6J
PRJNA229411	SRR1033966	48	0	strain_sam	C57BL/6J
PRJNA229411	SRR1033969	29	0	strain_sam	C57BL/6J
PRJNA238865	SRR1173458	49	0	strain_sam	C57BL/6J
PRJNA238865	SRR1173459	44	0	strain_sam	C57BL/6J
PRJNA238865	SRR1173460	38	0	strain_sam	C57BL/6J
PRJNA238865	SRR1173461	64	0	strain_sam	C57BL/6J
PRJNA238865	SRR1173463	49	0	strain_sam	C57BL/6J
PRJNA238865	SRR1173471	42	0	strain_sam	C57BL/6J
PRJNA238865	SRR1173473	73	0	strain_sam	C57BL/6J
PRJNA238865	SRR1173474	70	0	strain_sam	C57BL/6J
PRJNA238865	SRR1173476	48	0	strain_sam	C57BL/6J
PRJNA238865	SRR1173477	103	0	strain_sam	C57BL/6J
PRJNA238865	SRR1173480	27	0	strain_sam	C57BL/6J
PRJNA238865	SRR1173462	54	0	strain_sam	C57BL/6J
PRJNA238865	SRR1173466	55	0	strain_sam	C57BL/6J
PRJNA238865	SRR1173467	71	0	strain_sam	C57BL/6J
PRJNA238865	SRR1173468	61	0	strain_sam	C57BL/6J
PRJNA238865	SRR1173470	61	0	strain_sam	C57BL/6J
PRJNA238865	SRR1173472	111	0	strain_sam	C57BL/6J
PRJNA238865	SRR1173475	102	0	strain_sam	C57BL/6J
PRJNA238865	SRR1173478	21	0	strain_sam	C57BL/6J
PRJNA242836	SRR1206272	46	0	strain_sam	C57BL/6J
PRJNA248050	SRR1427048	17	0	breed_sam	C57BL/6J
PRJNA261976	SRR1585288	25	0	strain_sam	C57BL/6J
PRJNA261976	SRR1585290	17	0	strain_sam	C57BL/6J
PRJNA261976	SRR1585291	23	0	strain_sam	C57BL/6J
PRJNA261976	SRR1585292	17	0	strain_sam	C57BL/6J
PRJNA261976	SRR1585294	13	0	strain_sam	C57BL/6J
PRJNA261976	SRR1585295	10	0	strain_sam	C57BL/6J
PRJNA261976	SRR1585297	13	0	strain_sam	C57BL/6J
PRJNA261976	SRR1585298	14	0	strain_sam	C57BL/6J
PRJNA261976	SRR1585299	18	0	strain_sam	C57BL/6J
PRJNA262674	SRR1593497	23	0	strain_sam	C57BL/6J
PRJNA262674	SRR1593499	25	0	strain_sam	C57BL/6J
PRJNA262674	SRR1593501	14	0	strain_sam	C57BL/6J
PRJNA262674	SRR1593504	16	0	strain_sam	C57BL/6J
PRJNA262674	SRR1593506	17	0	strain_sam	C57BL/6J
PRJNA262674	SRR1593496	28	0	strain_sam	C57BL/6J
PRJNA262674	SRR1593500	25	0	strain_sam	C57BL/6J
PRJNA262674	SRR1593503	18	0	strain_sam	C57BL/6J
PRJNA262674	SRR1593505	19	0	strain_sam	C57BL/6J
PRJNA263026	SRR1596550	46	0	strain_sam	C57BL/6J
PRJNA264588	SRR1654044	11	0	breed_sam	C57BL/6J
PRJNA264588	SRR1654052	14	0	breed_sam	C57BL/6J
PRJNA264588	SRR1654060	16	0	breed_sam	C57BL/6J
PRJNA264588	SRR1654077	26	0	breed_sam	C57BL/6J
PRJNA264588	SRR1654041	1303	0	breed_sam	C57BL/6J
PRJNA264588	SRR1654053	25	0	breed_sam	C57BL/6J
PRJNA264588	SRR1654081	12	0	breed_sam	C57BL/6J
PRJNA264588	SRR1654085	14	0	breed_sam	C57BL/6J
PRJNA264807	SRR1624952	200	0	strain_sam	C57BL/6J
PRJNA266809	SRR1647737	11	0	strain_sam	C57BL/6J
PRJNA266809	SRR1647740	12	0	strain_sam	C57BL/6J
PRJNA266809	SRR1647741	11	0	strain_sam	C57BL/6J
PRJNA267123	SRR1650542	11	0	strain_sam	C57BL/6J
PRJNA267123	SRR1650547	20	0	strain_sam	C57BL/6J
PRJNA267123	SRR1650548	23	0	strain_sam	C57BL/6J
PRJNA267123	SRR1650549	15	0	strain_sam	C57BL/6J
PRJNA267123	SRR1650550	11	0	strain_sam	C57BL/6J
PRJNA267123	SRR1650541	12	0	strain_sam	C57BL/6J
PRJNA268980	SRR1686892	49	0	strain_sam	C57BL/6J
PRJNA268980	SRR1686893	27	0	strain_sam	C57BL/6J
PRJNA268980	SRR1686894	48	0	strain_sam	C57BL/6J
PRJNA276671	SRR1821736	13	0	strain_sam	C57BL/6J
PRJNA276671	SRR1821739	16	0	strain_sam	C57BL/6J
PRJNA276671	SRR1821740	19	0	strain_sam	C57BL/6J
PRJNA276671	SRR1821744	14	0	strain_sam	C57BL/6J
PRJNA276671	SRR1821751	10	0	strain_sam	C57BL/6J
PRJNA276671	SRR1821752	10	0	strain_sam	C57BL/6J
PRJNA276671	SRR1821756	10	0	strain_sam	C57BL/6J
PRJNA276671	SRR1821759	10	0	strain_sam	C57BL/6J
PRJNA276671	SRR1821760	12	0	strain_sam	C57BL/6J
PRJNA276671	SRR1821764	15	0	strain_sam	C57BL/6J
PRJNA276671	SRR1821735	15	0	strain_sam	C57BL/6J
PRJNA276671	SRR1821747	12	0	strain_sam	C57BL/6J
PRJNA279486	SRR1930941	10	0	strain_sam	C57BL/6J
PRJNA279486	SRR1930948	39	0	strain_sam	C57BL/6J
PRJNA279486	SRR1930953	18	0	strain_sam	C57BL/6J
PRJNA279486	SRR1930965	42	0	strain_sam	C57BL/6J
PRJNA279486	SRR1930966	10	0	strain_sam	C57BL/6J
PRJNA279486	SRR1930989	20	0	strain_sam	C57BL/6J
PRJNA279486	SRR1930993	25	0	strain_sam	C57BL/6J
PRJNA279486	SRR1930994	14	0	strain_sam	C57BL/6J
PRJNA279486	SRR1931006	26	0	strain_sam	C57BL/6J
PRJNA279486	SRR1931021	31	0	strain_sam	C57BL/6J
PRJNA279486	SRR1931112	11	0	strain_sam	C57BL/6J
PRJNA279486	SRR1931124	23	0	strain_sam	C57BL/6J
PRJNA279486	SRR3137849	17	0	strain_sam	C57BL/6J
PRJNA279486	SRR3137853	198	0	strain_sam	C57BL/6J
PRJNA279486	SRR3137888	94	0	strain_sam	C57BL/6J
PRJNA279486	SRR3137912	81	0	strain_sam	C57BL/6J
PRJNA279486	SRR3137942	78	0	strain_sam	C57BL/6J
PRJNA279486	SRR3137967	46	0	strain_sam	C57BL/6J
PRJNA279486	SRR3137975	44	0	strain_sam	C57BL/6J
PRJNA279486	SRR3137976	67	0	strain_sam	C57BL/6J
PRJNA279486	SRR3137991	49	0	strain_sam	C57BL/6J
PRJNA279486	SRR3137992	135	0	strain_sam	C57BL/6J
PRJNA279486	SRR1930977	34	0	strain_sam	C57BL/6J
PRJNA279486	SRR1931024	15	0	strain_sam	C57BL/6J
PRJNA280830	SRR1964526	11	0	strain_sam	C57BL/6J
PRJNA280830	SRR1964536	11	0	strain_sam	C57BL/6J
PRJNA280830	SRR1964541	12	0	strain_sam	C57BL/6J
PRJNA281360	SRR1976594	32	0	strain_sam	C57BL/6J
PRJNA281360	SRR3932664	14	0	strain_sam	C57BL/6J
PRJNA281360	SRR3932666	14	0	strain_sam	C57BL/6J
PRJNA281360	SRR3932668	18	0	strain_sam	C57BL/6J
PRJNA281360	SRR3932672	13	0	strain_sam	C57BL/6J
PRJNA284679	SRR2038197	30	0	strain_sam	C57BL/6J
PRJNA286698	SRR2059798	64	0	strain_sam	C57BL/6J
PRJNA286698	SRR2059800	11	0	strain_sam	C57BL/6J
PRJNA286698	SRR2059807	117	0	strain_sam	C57BL/6J
PRJNA286698	SRR2059808	19	0	strain_sam	C57BL/6J
PRJNA286698	SRR2059836	24	0	strain_sam	C57BL/6J
PRJNA286698	SRR2059838	76	0	strain_sam	C57BL/6J
PRJNA286778	SRR11282961	14	0	strain_sam	C57BL/6J
PRJNA286778	SRR11282963	14	0	strain_sam	C57BL/6J
PRJNA286778	SRR2061844	25	0	strain_sam	C57BL/6J
PRJNA286778	SRR2061987	15	0	strain_sam	C57BL/6J
PRJNA286778	SRR11282967	16	0	strain_sam	C57BL/6J
PRJNA286778	SRR2061854	23	0	strain_sam	C57BL/6J
PRJNA286778	SRR2061913	23	0	strain_sam	C57BL/6J
PRJNA289455	SRR2096316	16	0	strain_sam	C57BL/6J
PRJNA289455	SRR2096318	10	0	strain_sam	C57BL/6J
PRJNA289455	SRR2096319	10	0	strain_sam	C57BL/6J
PRJNA289455	SRR2096320	12	0	strain_sam	C57BL/6J
PRJNA289455	SRR2096323	11	0	strain_sam	C57BL/6J
PRJNA289455	SRR2096324	13	0	strain_sam	C57BL/6J
PRJNA289455	SRR2096325	12	0	strain_sam	C57BL/6J
PRJNA289455	SRR2096326	18	0	strain_sam	C57BL/6J
PRJNA289455	SRR2096327	15	0	strain_sam	C57BL/6J
PRJNA289455	SRR2096328	10	0	strain_sam	C57BL/6J
PRJNA289455	SRR2096329	18	0	strain_sam	C57BL/6J
PRJNA289455	SRR2096333	18	0	strain_sam	C57BL/6J
PRJNA289455	SRR2096341	12	0	strain_sam	C57BL/6J
PRJNA289455	SRR2096351	16	0	strain_sam	C57BL/6J
PRJNA289455	SRR2096352	30	0	strain_sam	C57BL/6J
PRJNA289455	SRR2096357	28	0	strain_sam	C57BL/6J
PRJNA289455	SRR2096359	20	0	strain_sam	C57BL/6J
PRJNA289455	SRR2096360	25	0	strain_sam	C57BL/6J
PRJNA289455	SRR2096362	23	0	strain_sam	C57BL/6J
PRJNA289455	SRR2096363	35	0	strain_sam	C57BL/6J
PRJNA289455	SRR2096368	19	0	strain_sam	C57BL/6J
PRJNA289455	SRR2096369	21	0	strain_sam	C57BL/6J
PRJNA289455	SRR2096370	13	0	strain_sam	C57BL/6J
PRJNA289455	SRR2096371	18	0	strain_sam	C57BL/6J
PRJNA289455	SRR2096372	27	0	strain_sam	C57BL/6J
PRJNA289455	SRR2096374	13	0	strain_sam	C57BL/6J
PRJNA289455	SRR2096375	15	0	strain_sam	C57BL/6J
PRJNA289455	SRR2096376	14	0	strain_sam	C57BL/6J
PRJNA289455	SRR2096378	22	0	strain_sam	C57BL/6J
PRJNA289455	SRR2096379	13	0	strain_sam	C57BL/6J
PRJNA289455	SRR2096380	13	0	strain_sam	C57BL/6J
PRJNA289455	SRR2096381	17	0	strain_sam	C57BL/6J
PRJNA289455	SRR2096382	26	0	strain_sam	C57BL/6J
PRJNA289455	SRR2096383	13	0	strain_sam	C57BL/6J
PRJNA289455	SRR2096384	13	0	strain_sam	C57BL/6J
PRJNA289455	SRR2096385	15	0	strain_sam	C57BL/6J
PRJNA289455	SRR2096386	21	0	strain_sam	C57BL/6J
PRJNA289455	SRR2096387	14	0	strain_sam	C57BL/6J
PRJNA289455	SRR2096322	12	0	strain_sam	C57BL/6J
PRJNA289455	SRR2096330	16	0	strain_sam	C57BL/6J
PRJNA289455	SRR2096335	17	0	strain_sam	C57BL/6J
PRJNA289455	SRR2096336	18	0	strain_sam	C57BL/6J
PRJNA289455	SRR2096337	15	0	strain_sam	C57BL/6J
PRJNA289455	SRR2096338	17	0	strain_sam	C57BL/6J
PRJNA289455	SRR2096339	22	0	strain_sam	C57BL/6J
PRJNA289455	SRR2096340	27	0	strain_sam	C57BL/6J
PRJNA289455	SRR2096342	15	0	strain_sam	C57BL/6J
PRJNA289455	SRR2096343	16	0	strain_sam	C57BL/6J
PRJNA289455	SRR2096344	20	0	strain_sam	C57BL/6J
PRJNA289455	SRR2096345	18	0	strain_sam	C57BL/6J
PRJNA289455	SRR2096346	25	0	strain_sam	C57BL/6J
PRJNA289455	SRR2096347	33	0	strain_sam	C57BL/6J
PRJNA289455	SRR2096348	22	0	strain_sam	C57BL/6J
PRJNA289455	SRR2096349	19	0	strain_sam	C57BL/6J
PRJNA289455	SRR2096350	18	0	strain_sam	C57BL/6J
PRJNA289455	SRR2096353	23	0	strain_sam	C57BL/6J
PRJNA289455	SRR2096354	20	0	strain_sam	C57BL/6J
PRJNA289455	SRR2096355	23	0	strain_sam	C57BL/6J
PRJNA289455	SRR2096356	18	0	strain_sam	C57BL/6J
PRJNA289455	SRR2096358	30	0	strain_sam	C57BL/6J
PRJNA289455	SRR2096361	20	0	strain_sam	C57BL/6J
PRJNA289455	SRR2096364	25	0	strain_sam	C57BL/6J
PRJNA289455	SRR2096365	25	0	strain_sam	C57BL/6J
PRJNA289455	SRR2096366	28	0	strain_sam	C57BL/6J
PRJNA289455	SRR2096367	22	0	strain_sam	C57BL/6J
PRJNA290473	SRR2121313	67	0	strain_sam	C57BL/6J
PRJNA291453	SRR2134460	12	0	strain_background_sam_s_dpl381	C57BL/6J
PRJNA291453	SRR2134464	12	0	strain_background_sam_s_dpl381	C57BL/6J
PRJNA291453	SRR2134466	12	0	strain_background_sam_s_dpl381	C57BL/6J
PRJNA291453	SRR2134467	12	0	strain_background_sam_s_dpl381	C57BL/6J
PRJNA291453	SRR2134468	14	0	strain_background_sam_s_dpl381	C57BL/6J
PRJNA293822	SRR2182333	14	0	strain_sam	C57BL/6J
PRJNA305898	SRR2993953	76	0	strain_sam	C57BL/6J
PRJNA305898	SRR2993954	57	0	strain_sam	C57BL/6J
PRJNA305898	SRR2993955	59	0	strain_sam	C57BL/6J
PRJNA305898	SRR2993956	59	0	strain_sam	C57BL/6J
PRJNA305898	SRR2993957	51	0	strain_sam	C57BL/6J
PRJNA305898	SRR2993958	78	0	strain_sam	C57BL/6J
PRJNA305950	SRR2995684	19	0	strain_sam	C57BL/6J
PRJNA306586	SRR3035757	13	0	strain_sam	C57BL/6J
PRJNA306586	SRR3035758	32	0	strain_sam	C57BL/6J
PRJNA306586	SRR3035761	19	0	strain_sam	C57BL/6J
PRJNA307703	SRR3086612	42	0	strain_sam	C57BL/6J
PRJNA307703	SRR3086614	37	0	strain_sam	C57BL/6J
PRJNA307703	SRR3086616	41	0	strain_sam	C57BL/6J
PRJNA307703	SRR3086618	33	0	strain_sam	C57BL/6J
PRJNA307703	SRR3086622	31	0	strain_sam	C57BL/6J
PRJNA307703	SRR3086624	21	0	strain_sam	C57BL/6J
PRJNA307703	SRR3086626	29	0	strain_sam	C57BL/6J
PRJNA308021	SRR3087159	27	0	strain_sam	C57BL/6J
PRJNA308021	SRR3087161	20	0	strain_sam	C57BL/6J
PRJNA308954	SRR3104228	31	0	strain_sam	C57BL/6J
PRJNA308954	SRR3104229	30	0	strain_sam	C57BL/6J
PRJNA311048	SRR3147424	37	0	strain_sam	C57BL/6J
PRJNA311048	SRR3147426	61	0	strain_sam	C57BL/6J
PRJNA311048	SRR3147428	50	0	strain_sam	C57BL/6J
PRJNA311330	SRR3157485	19	0	strain_sam	C57BL/6J
PRJNA311330	SRR3157507	37	0	strain_sam	C57BL/6J
PRJNA311330	SRR3157584	28	0	strain_sam	C57BL/6J
PRJNA311330	SRR3157634	102	0	strain_sam	C57BL/6J
PRJNA311330	SRR3157643	21	0	strain_sam	C57BL/6J
PRJNA312845	SRR3182812	26	0	strain_sam	C57BL/6J
PRJNA312845	SRR3182813	34	0	strain_sam	C57BL/6J
PRJNA312845	SRR3182815	38	0	strain_sam	C57BL/6J
PRJNA312845	SRR3182816	32	0	strain_sam	C57BL/6J
PRJNA312845	SRR3182826	28	0	strain_sam	C57BL/6J
PRJNA312845	SRR3182832	11	0	strain_sam	C57BL/6J
PRJNA312845	SRR3182841	40	0	strain_sam	C57BL/6J
PRJNA312845	SRR3182843	39	0	strain_sam	C57BL/6J
PRJNA312845	SRR3182844	34	0	strain_sam	C57BL/6J
PRJNA312845	SRR3182848	32	0	strain_sam	C57BL/6J
PRJNA312845	SRR3182853	30	0	strain_sam	C57BL/6J
PRJNA312845	SRR3182859	46	0	strain_sam	C57BL/6J
PRJNA312845	SRR3182860	24	0	strain_sam	C57BL/6J
PRJNA312845	SRR3182817	41	0	strain_sam	C57BL/6J
PRJNA312845	SRR3182842	41	0	strain_sam	C57BL/6J
PRJNA312845	SRR3182845	46	0	strain_sam	C57BL/6J
PRJNA312845	SRR3182846	46	0	strain_sam	C57BL/6J
PRJNA312845	SRR3182847	44	0	strain_sam	C57BL/6J
PRJNA312845	SRR3182849	43	0	strain_sam	C57BL/6J
PRJNA312845	SRR3182850	56	0	strain_sam	C57BL/6J
PRJNA312845	SRR3182852	29	0	strain_sam	C57BL/6J
PRJNA312845	SRR3182854	40	0	strain_sam	C57BL/6J
PRJNA312845	SRR3182855	41	0	strain_sam	C57BL/6J
PRJNA312845	SRR3182856	36	0	strain_sam	C57BL/6J
PRJNA312845	SRR3182866	48	0	strain_sam	C57BL/6J
PRJNA312845	SRR3182869	38	0	strain_sam	C57BL/6J
PRJNA316146	SRR3287243	23	0	strain_sam	C57BL/6J
PRJNA316146	SRR3287245	13	0	strain_sam	C57BL/6J
PRJNA320627	SRR3476414	49	0	strain_sam	C57BL/6J
PRJNA320627	SRR3476420	56	0	strain_sam	C57BL/6J
PRJNA320627	SRR3476421	46	0	strain_sam	C57BL/6J
PRJNA320627	SRR3476422	31	0	strain_sam	C57BL/6J
PRJNA320627	SRR3476423	77	0	strain_sam	C57BL/6J
PRJNA320627	SRR3476424	65	0	strain_sam	C57BL/6J
PRJNA320627	SRR3476425	61	0	strain_sam	C57BL/6J
PRJNA320627	SRR3476426	71	0	strain_sam	C57BL/6J
PRJNA320627	SRR3476427	70	0	strain_sam	C57BL/6J
PRJNA320627	SRR3476428	89	0	strain_sam	C57BL/6J
PRJNA320627	SRR3476415	47	0	strain_sam	C57BL/6J
PRJNA320627	SRR3476418	41	0	strain_sam	C57BL/6J
PRJNA320627	SRR3476419	34	0	strain_sam	C57BL/6J
PRJNA320629	SRR3476400	49	0	strain_sam	C57BL/6J
PRJNA320629	SRR3476401	54	0	strain_sam	C57BL/6J
PRJNA320629	SRR3476403	61	0	strain_sam	C57BL/6J
PRJNA320629	SRR3476404	63	0	strain_sam	C57BL/6J
PRJNA320629	SRR3476406	64	0	strain_sam	C57BL/6J
PRJNA320629	SRR3476407	44	0	strain_sam	C57BL/6J
PRJNA320629	SRR3476408	46	0	strain_sam	C57BL/6J
PRJNA320629	SRR3476402	52	0	strain_sam	C57BL/6J
PRJNA320629	SRR3476405	54	0	strain_sam	C57BL/6J
PRJNA322136	SRR3547143	26	0	strain_sam	C57BL/6J
PRJNA322136	SRR3547155	30	0	strain_sam	C57BL/6J
PRJNA322136	SRR3547249	23	0	strain_sam	C57BL/6J
PRJNA322136	SRR3547356	15	0	strain_sam	C57BL/6J
PRJNA322136	SRR3547360	20	0	strain_sam	C57BL/6J
PRJNA322136	SRR3547475	17	0	strain_sam	C57BL/6J
PRJNA322136	SRR3547476	25	0	strain_sam	C57BL/6J
PRJNA322136	SRR3547477	24	0	strain_sam	C57BL/6J
PRJNA322136	SRR3547556	29	0	strain_sam	C57BL/6J
PRJNA322136	SRR3547560	22	0	strain_sam	C57BL/6J
PRJNA324547	SRR3630457	30	0	strain_sam	C57BL/6J
PRJNA324547	SRR3630458	45	0	strain_sam	C57BL/6J
PRJNA324547	SRR3630459	43	0	strain_sam	C57BL/6J
PRJNA325455	SRR3659160	30	0	strain_sam	C57BL/6J
PRJNA325455	SRR3659161	34	0	strain_sam	C57BL/6J
PRJNA326278	SRR3705520	11	0	strain_background_sam	C57BL/6J
PRJNA326278	SRR3705521	13	0	strain_background_sam	C57BL/6J
PRJNA326278	SRR3705522	13	0	strain_background_sam	C57BL/6J
PRJNA326278	SRR3705524	14	0	strain_background_sam	C57BL/6J
PRJNA326278	SRR3705525	11	0	strain_background_sam	C57BL/6J
PRJNA326278	SRR3705526	12	0	strain_background_sam	C57BL/6J
PRJNA326278	SRR3705528	15	0	strain_background_sam	C57BL/6J
PRJNA327433	SRR3734797	10	0	strain_sam	C57BL/6J
PRJNA327433	SRR3734799	19	0	strain_sam	C57BL/6J
PRJNA327433	SRR3734805	18	0	strain_sam	C57BL/6J
PRJNA327433	SRR3734809	20	0	strain_sam	C57BL/6J
PRJNA327433	SRR3734813	15	0	strain_sam	C57BL/6J
PRJNA327433	SRR3734818	17	0	strain_sam	C57BL/6J
PRJNA327433	SRR3734823	14	0	strain_sam	C57BL/6J
PRJNA327433	SRR3734824	13	0	strain_sam	C57BL/6J
PRJNA327433	SRR3734804	13	0	strain_sam	C57BL/6J
PRJNA327433	SRR3734807	17	0	strain_sam	C57BL/6J
PRJNA327433	SRR3734814	23	0	strain_sam	C57BL/6J
PRJNA327433	SRR3734815	12	0	strain_sam	C57BL/6J
PRJNA327433	SRR3734822	26	0	strain_sam	C57BL/6J
PRJNA327433	SRR3734825	12	0	strain_sam	C57BL/6J
PRJNA328144	SRR3748198	48	0	strain_sam	C57BL/6J
PRJNA328144	SRR3748199	51	0	strain_sam	C57BL/6J
PRJNA328144	SRR3748200	67	0	strain_sam	C57BL/6J
PRJNA328144	SRR3748201	46	0	strain_sam	C57BL/6J
PRJNA328144	SRR3748202	48	0	strain_sam	C57BL/6J
PRJNA328144	SRR3748203	52	0	strain_sam	C57BL/6J
PRJNA328144	SRR3924290	51	0	strain_sam	C57BL/6J
PRJNA328144	SRR3924291	69	0	strain_sam	C57BL/6J
PRJNA328144	SRR3924297	58	0	strain_sam	C57BL/6J
PRJNA328144	SRR3924306	78	0	strain_sam	C57BL/6J
PRJNA328144	SRR3924311	69	0	strain_sam	C57BL/6J
PRJNA328144	SRR3924312	61	0	strain_sam	C57BL/6J
PRJNA329408	SRR3927223	18	0	strain_sam	C57BL/6J
PRJNA329408	SRR3927224	16	0	strain_sam	C57BL/6J
PRJNA329408	SRR3927225	12	0	strain_sam	C57BL/6J
PRJNA329408	SRR3927227	18	0	strain_sam	C57BL/6J
PRJNA336339	SRR3996603	15	0	strain_background_sam	C57BL/6J
PRJNA336339	SRR3996610	11	0	strain_background_sam	C57BL/6J
PRJNA341396	SRR4106148	19	0	strain_sam	C57BL/6J
PRJNA341396	SRR4106149	10	0	strain_sam	C57BL/6J
PRJNA341396	SRR4106150	10	0	strain_sam	C57BL/6J
PRJNA341396	SRR4106147	11	0	strain_sam	C57BL/6J
PRJNA341993	SRR4175333	11	0	strain_sam	C57BL/6J
PRJNA342670	SRR4238843	11	0	strain_sam	C57BL/6J
PRJNA342670	SRR4238835	14	0	strain_sam	C57BL/6J
PRJNA342670	SRR4238836	28	0	strain_sam	C57BL/6J
PRJNA342670	SRR4238837	25	0	strain_sam	C57BL/6J
PRJNA342670	SRR4238841	18	0	strain_sam	C57BL/6J
PRJNA342670	SRR4238842	33	0	strain_sam	C57BL/6J
PRJNA344028	SRR4292395	137	0	strain_sam	C57BL/6J
PRJNA344028	SRR4292474	144	0	strain_sam	C57BL/6J
PRJNA344028	SRR4292489	78	0	strain_sam	C57BL/6J
PRJNA345270	SRR4340937	21	0	strain_sam	C57BL/6J
PRJNA345270	SRR4340938	37	0	strain_sam	C57BL/6J
PRJNA345270	SRR4340939	16	0	strain_sam	C57BL/6J
PRJNA345270	SRR4340940	27	0	strain_sam	C57BL/6J
PRJNA345270	SRR4340941	27	0	strain_sam	C57BL/6J
PRJNA345270	SRR4340942	26	0	strain_sam	C57BL/6J
PRJNA345270	SRR4340943	20	0	strain_sam	C57BL/6J
PRJNA345270	SRR4340944	31	0	strain_sam	C57BL/6J
PRJNA345270	SRR4340946	23	0	strain_sam	C57BL/6J
PRJNA345270	SRR4340947	19	0	strain_sam	C57BL/6J
PRJNA345270	SRR4340948	28	0	strain_sam	C57BL/6J
PRJNA347654	SRR4413212	10	0	strain_background_sam_s_dpl381	C57BL/6J
PRJNA352913	SRR5010533	13	0	strain_sam	C57BL/6J
PRJNA353109	SRR5010923	22	0	mouse_stain_sam	C57BL/6J
PRJNA353109	SRR5010940	21	0	mouse_stain_sam	C57BL/6J
PRJNA354705	SRR5047271	24	0	strain_sam	C57BL/6J
PRJNA354705	SRR5047273	21	0	strain_sam	C57BL/6J
PRJNA354705	SRR5047274	29	0	strain_sam	C57BL/6J
PRJNA354705	SRR5047272	33	0	strain_sam	C57BL/6J
PRJNA354962	SRR5054786	31	0	strain_sam	C57BL/6J
PRJNA354962	SRR5054787	42	0	strain_sam	C57BL/6J
PRJNA354962	SRR5054790	40	0	strain_sam	C57BL/6J
PRJNA354962	SRR5054796	14	0	strain_sam	C57BL/6J
PRJNA354962	SRR5054800	11	0	strain_sam	C57BL/6J
PRJNA354962	SRR5054802	21	0	strain_sam	C57BL/6J
PRJNA354962	SRR5054804	17	0	strain_sam	C57BL/6J
PRJNA354962	SRR5054808	16	0	strain_sam	C57BL/6J
PRJNA354962	SRR5054810	15	0	strain_sam	C57BL/6J
PRJNA354962	SRR5054788	36	0	strain_sam	C57BL/6J
PRJNA354962	SRR5054789	59	0	strain_sam	C57BL/6J
PRJNA356286	SRR5077535	34	0	strain_sam	C57BL/6J
PRJNA356286	SRR5077536	36	0	strain_sam	C57BL/6J
PRJNA356773	SRR5090644	12	0	strain_sam	C57BL/6J
PRJNA356773	SRR5090645	10	0	strain_sam	C57BL/6J
PRJNA356773	SRR5090646	14	0	strain_sam	C57BL/6J
PRJNA356773	SRR5090647	17	0	strain_sam	C57BL/6J
PRJNA356773	SRR5090648	14	0	strain_sam	C57BL/6J
PRJNA356773	SRR5090649	20	0	strain_sam	C57BL/6J
PRJNA356773	SRR5090650	19	0	strain_sam	C57BL/6J
PRJNA356773	SRR5090651	12	0	strain_sam	C57BL/6J
PRJNA356773	SRR5090654	12	0	strain_sam	C57BL/6J
PRJNA356773	SRR5090657	13	0	strain_sam	C57BL/6J
PRJNA356773	SRR5090660	17	0	strain_sam	C57BL/6J
PRJNA356773	SRR5090661	11	0	strain_sam	C57BL/6J
PRJNA356773	SRR5090662	17	0	strain_sam	C57BL/6J
PRJNA356773	SRR5090664	16	0	strain_sam	C57BL/6J
PRJNA356773	SRR5090666	14	0	strain_sam	C57BL/6J
PRJNA356773	SRR5090667	11	0	strain_sam	C57BL/6J
PRJNA356773	SRR5090668	17	0	strain_sam	C57BL/6J
PRJNA356773	SRR5090669	21	0	strain_sam	C57BL/6J
PRJNA356773	SRR5090670	18	0	strain_sam	C57BL/6J
PRJNA356773	SRR5090673	13	0	strain_sam	C57BL/6J
PRJNA356773	SRR5090674	11	0	strain_sam	C57BL/6J
PRJNA356773	SRR5090677	10	0	strain_sam	C57BL/6J
PRJNA356773	SRR5090659	21	0	strain_sam	C57BL/6J
PRJNA357300	SRR5106551	52	0	strain_background_sam_s_dpl381	C57BL/6J
PRJNA357300	SRR5106553	85	0	strain_background_sam_s_dpl381	C57BL/6J
PRJNA357300	SRR5106563	80	0	strain_background_sam_s_dpl381	C57BL/6J
PRJNA357300	SRR5106565	38	0	strain_background_sam_s_dpl381	C57BL/6J
PRJNA357300	SRR5106567	37	0	strain_background_sam_s_dpl381	C57BL/6J
PRJNA357612	SRR5114090	19	0	strain_sam	C57BL/6J
PRJNA357612	SRR5114106	10	0	strain_sam	C57BL/6J
PRJNA357612	SRR5114114	19	0	strain_sam	C57BL/6J
PRJNA357612	SRR5114118	13	0	strain_sam	C57BL/6J
PRJNA357612	SRR5114134	13	0	strain_sam	C57BL/6J
PRJNA357612	SRR5114138	21	0	strain_sam	C57BL/6J
PRJNA357612	SRR5114146	30	0	strain_sam	C57BL/6J
PRJNA357612	SRR5114154	11	0	strain_sam	C57BL/6J
PRJNA357612	SRR5114162	13	0	strain_sam	C57BL/6J
PRJNA357612	SRR5114174	15	0	strain_sam	C57BL/6J
PRJNA357612	SRR5114182	16	0	strain_sam	C57BL/6J
PRJNA357612	SRR5114186	15	0	strain_sam	C57BL/6J
PRJNA357612	SRR5114206	16	0	strain_sam	C57BL/6J
PRJNA357612	SRR5114210	10	0	strain_sam	C57BL/6J
PRJNA357612	SRR5114218	11	0	strain_sam	C57BL/6J
PRJNA357612	SRR5114222	12	0	strain_sam	C57BL/6J
PRJNA357612	SRR5114238	10	0	strain_sam	C57BL/6J
PRJNA357612	SRR5114250	15	0	strain_sam	C57BL/6J
PRJNA357612	SRR5114078	13	0	strain_sam	C57BL/6J
PRJNA357612	SRR5114086	22	0	strain_sam	C57BL/6J
PRJNA357612	SRR5114246	25	0	strain_sam	C57BL/6J
PRJNA357684	SRR5115753	49	0	strain_sam	C57BL/6J
PRJNA357684	SRR5115755	55	0	strain_sam	C57BL/6J
PRJNA357684	SRR5115757	59	0	strain_sam	C57BL/6J
PRJNA357684	SRR5115759	69	0	strain_sam	C57BL/6J
PRJNA357684	SRR5115761	41	0	strain_sam	C57BL/6J
PRJNA357684	SRR5115763	51	0	strain_sam	C57BL/6J
PRJNA357684	SRR5115768	56	0	strain_sam	C57BL/6J
PRJNA357684	SRR5115770	55	0	strain_sam	C57BL/6J
PRJNA357684	SRR5115773	57	0	strain_sam	C57BL/6J
PRJNA357684	SRR5115775	34	0	strain_sam	C57BL/6J
PRJNA357684	SRR5115777	60	0	strain_sam	C57BL/6J
PRJNA357684	SRR5115785	37	0	strain_sam	C57BL/6J
PRJNA357684	SRR5115787	61	0	strain_sam	C57BL/6J
PRJNA357684	SRR5115789	50	0	strain_sam	C57BL/6J
PRJNA357684	SRR5115746	74	0	strain_sam	C57BL/6J
PRJNA358099	SRR5121133	81	0	strain_sam	C57BL/6J
PRJNA358099	SRR5121137	38	0	strain_sam	C57BL/6J
PRJNA358099	SRR5121134	90	0	strain_sam	C57BL/6J
PRJNA358099	SRR5121135	96	0	strain_sam	C57BL/6J
PRJNA359189	SRR5133537	41	0	background_strain_sam_s_dpl78	C57BL/6J
PRJNA359189	SRR5133538	15	0	background_strain_sam_s_dpl78	C57BL/6J
PRJNA359189	SRR5133539	28	0	background_strain_sam_s_dpl78	C57BL/6J
PRJNA359189	SRR5133540	22	0	background_strain_sam_s_dpl78	C57BL/6J
PRJNA359189	SRR5133543	55	0	background_strain_sam_s_dpl78	C57BL/6J
PRJNA359189	SRR5133550	19	0	background_strain_sam_s_dpl78	C57BL/6J
PRJNA359189	SRR5133551	28	0	background_strain_sam_s_dpl78	C57BL/6J
PRJNA359189	SRR5133552	33	0	background_strain_sam_s_dpl78	C57BL/6J
PRJNA360108	SRR5144770	49	0	strain_sam	C57BL/6J
PRJNA360108	SRR5144771	11	0	strain_sam	C57BL/6J
PRJNA360108	SRR5144772	44	0	strain_sam	C57BL/6J
PRJNA360108	SRR5144773	35	0	strain_sam	C57BL/6J
PRJNA360108	SRR5144775	28	0	strain_sam	C57BL/6J
PRJNA360108	SRR5144776	20	0	strain_sam	C57BL/6J
PRJNA360108	SRR5144777	11	0	strain_sam	C57BL/6J
PRJNA360108	SRR5144778	31	0	strain_sam	C57BL/6J
PRJNA360108	SRR5144779	10	0	strain_sam	C57BL/6J
PRJNA360108	SRR5144781	11	0	strain_sam	C57BL/6J
PRJNA360108	SRR5144782	29	0	strain_sam	C57BL/6J
PRJNA360108	SRR5144784	34	0	strain_sam	C57BL/6J
PRJNA360108	SRR5144774	22	0	strain_sam	C57BL/6J
PRJNA360688	SRR5163949	12	0	strain_sam	C57BL/6J
PRJNA360688	SRR5163950	16	0	strain_sam	C57BL/6J
PRJNA360688	SRR5163951	11	0	strain_sam	C57BL/6J
PRJNA360688	SRR5163954	16	0	strain_sam	C57BL/6J
PRJNA360958	SRR5168176	62	0	strain_sam	C57BL/6J
PRJNA360958	SRR5168182	54	0	strain_sam	C57BL/6J
PRJNA360958	SRR5168178	45	0	strain_sam	C57BL/6J
PRJNA363078	SRR5198694	12	0	breed_sam	C57BL/6J
PRJNA368689	SRR5201198	12	0	strain_sam	C57BL/6J
PRJNA369622	SRR5224125	29	0	strain_sam	C57BL/6J
PRJNA369622	SRR5224126	18	0	strain_sam	C57BL/6J
PRJNA369622	SRR5224127	47	0	strain_sam	C57BL/6J
PRJNA369622	SRR5224128	62	0	strain_sam	C57BL/6J
PRJNA369622	SRR5224129	31	0	strain_sam	C57BL/6J
PRJNA369622	SRR5224130	24	0	strain_sam	C57BL/6J
PRJNA374550	SRR5250857	26	0	strain_sam	C57BL/6J
PRJNA374550	SRR5250860	25	0	strain_sam	C57BL/6J
PRJNA374550	SRR5250862	24	0	strain_sam	C57BL/6J
PRJNA374550	SRR5250863	15	0	strain_sam	C57BL/6J
PRJNA374550	SRR5250866	16	0	strain_sam	C57BL/6J
PRJNA374550	SRR5250867	22	0	strain_sam	C57BL/6J
PRJNA374550	SRR5250869	17	0	strain_sam	C57BL/6J
PRJNA374550	SRR5250871	10	0	strain_sam	C57BL/6J
PRJNA374550	SRR5250873	12	0	strain_sam	C57BL/6J
PRJNA374550	SRR5250874	10	0	strain_sam	C57BL/6J
PRJNA374550	SRR5250876	18	0	strain_sam	C57BL/6J
PRJNA374550	SRR5250877	25	0	strain_sam	C57BL/6J
PRJNA374550	SRR5250878	22	0	strain_sam	C57BL/6J
PRJNA374550	SRR5250880	18	0	strain_sam	C57BL/6J
PRJNA374550	SRR5250882	19	0	strain_sam	C57BL/6J
PRJNA374550	SRR5250883	18	0	strain_sam	C57BL/6J
PRJNA374550	SRR5250884	19	0	strain_sam	C57BL/6J
PRJNA374550	SRR5250859	30	0	strain_sam	C57BL/6J
PRJNA374550	SRR5250861	29	0	strain_sam	C57BL/6J
PRJNA374550	SRR5250864	27	0	strain_sam	C57BL/6J
PRJNA374550	SRR5250865	12	0	strain_sam	C57BL/6J
PRJNA374550	SRR5250870	20	0	strain_sam	C57BL/6J
PRJNA374550	SRR5250872	22	0	strain_sam	C57BL/6J
PRJNA374550	SRR5250885	18	0	strain_sam	C57BL/6J
PRJNA374550	SRR5250886	24	0	strain_sam	C57BL/6J
PRJNA374550	SRR5250888	24	0	strain_sam	C57BL/6J
PRJNA374550	SRR5250890	16	0	strain_sam	C57BL/6J
PRJNA374550	SRR5250892	26	0	strain_sam	C57BL/6J
PRJNA374550	SRR5250894	27	0	strain_sam	C57BL/6J
PRJNA374559	SRR5250968	50	0	strain_sam	C57BL/6J
PRJNA374559	SRR5250972	94	0	strain_sam	C57BL/6J
PRJNA374596	SRR5252248	29	0	strain_sam	C57BL/6J
PRJNA374596	SRR5252249	36	0	strain_sam	C57BL/6J
PRJNA374596	SRR5252250	49	0	strain_sam	C57BL/6J
PRJNA374596	SRR5252251	32	0	strain_sam	C57BL/6J
PRJNA374596	SRR5252252	25	0	strain_sam	C57BL/6J
PRJNA374596	SRR5252253	53	0	strain_sam	C57BL/6J
PRJNA374596	SRR5252254	30	0	strain_sam	C57BL/6J
PRJNA374596	SRR5252255	32	0	strain_sam	C57BL/6J
PRJNA374596	SRR5252257	32	0	strain_sam	C57BL/6J
PRJNA374596	SRR5252256	45	0	strain_sam	C57BL/6J
PRJNA379048	SRR5340217	369	0	strain_sam	C57BL/6J
PRJNA379048	SRR5340219	391	0	strain_sam	C57BL/6J
PRJNA379048	SRR5340221	350	0	strain_sam	C57BL/6J
PRJNA379048	SRR5340218	276	0	strain_sam	C57BL/6J
PRJNA379048	SRR5340220	477	0	strain_sam	C57BL/6J
PRJNA379284	SRR5345491	19	0	strain_sam	C57BL/6J
PRJNA379284	SRR5345492	32	0	strain_sam	C57BL/6J
PRJNA379284	SRR5345493	17	0	strain_sam	C57BL/6J
PRJNA379284	SRR5345494	14	0	strain_sam	C57BL/6J
PRJNA379284	SRR5345495	10	0	strain_sam	C57BL/6J
PRJNA379284	SRR5345496	15	0	strain_sam	C57BL/6J
PRJNA379284	SRR5345497	21	0	strain_sam	C57BL/6J
PRJNA379284	SRR5345498	14	0	strain_sam	C57BL/6J
PRJNA379284	SRR5345500	22	0	strain_sam	C57BL/6J
PRJNA379284	SRR5345501	25	0	strain_sam	C57BL/6J
PRJNA379284	SRR5345502	17	0	strain_sam	C57BL/6J
PRJNA379284	SRR5345504	19	0	strain_sam	C57BL/6J
PRJNA379422	SRR5349715	17	0	strain_sam	C57BL/6J
PRJNA379422	SRR5349716	11	0	strain_sam	C57BL/6J
PRJNA379422	SRR5349717	18	0	strain_sam	C57BL/6J
PRJNA379422	SRR5349721	12	0	strain_sam	C57BL/6J
PRJNA379422	SRR5349722	14	0	strain_sam	C57BL/6J
PRJNA379422	SRR5349737	18	0	strain_sam	C57BL/6J
PRJNA379422	SRR5349740	14	0	strain_sam	C57BL/6J
PRJNA379422	SRR5349743	17	0	strain_sam	C57BL/6J
PRJNA379422	SRR5349746	24	0	strain_sam	C57BL/6J
PRJNA379422	SRR5349748	15	0	strain_sam	C57BL/6J
PRJNA379422	SRR5349753	15	0	strain_sam	C57BL/6J
PRJNA379422	SRR5349755	10	0	strain_sam	C57BL/6J
PRJNA379422	SRR5349726	13	0	strain_sam	C57BL/6J
PRJNA379422	SRR5349729	16	0	strain_sam	C57BL/6J
PRJNA379422	SRR5349735	19	0	strain_sam	C57BL/6J
PRJNA379422	SRR5349738	17	0	strain_sam	C57BL/6J
PRJNA380960	SRR5388896	12	0	strain_sam	C57BL/6J
PRJNA381006	SRR5395999	12	0	strain_sam	C57BL/6J
PRJNA381006	SRR5396000	49	0	strain_sam	C57BL/6J
PRJNA381006	SRR5396003	50	0	strain_sam	C57BL/6J
PRJNA381006	SRR5396002	72	0	strain_sam	C57BL/6J
PRJNA382450	SRR5644666	61	0	strain_sam	C57BL/6J
PRJNA382450	SRR5644669	86	0	strain_sam	C57BL/6J
PRJNA382450	SRR5644675	36	0	strain_sam	C57BL/6J
PRJNA382450	SRR5644676	80	0	strain_sam	C57BL/6J
PRJNA382450	SRR5644681	11	0	strain_sam	C57BL/6J
PRJNA382450	SRR5644682	24	0	strain_sam	C57BL/6J
PRJNA382450	SRR5644683	13	0	strain_sam	C57BL/6J
PRJNA382450	SRR5644685	19	0	strain_sam	C57BL/6J
PRJNA382450	SRR5644686	37	0	strain_sam	C57BL/6J
PRJNA382450	SRR5644689	19	0	strain_sam	C57BL/6J
PRJNA382450	SRR5644694	88	0	strain_sam	C57BL/6J
PRJNA382450	SRR5644696	31	0	strain_sam	C57BL/6J
PRJNA382450	SRR5644702	17	0	strain_sam	C57BL/6J
PRJNA382450	SRR5644703	31	0	strain_sam	C57BL/6J
PRJNA382450	SRR5644712	28	0	strain_sam	C57BL/6J
PRJNA382450	SRR5644713	43	0	strain_sam	C57BL/6J
PRJNA382450	SRR5644715	24	0	strain_sam	C57BL/6J
PRJNA382450	SRR5644717	45	0	strain_sam	C57BL/6J
PRJNA382450	SRR5644719	54	0	strain_sam	C57BL/6J
PRJNA382450	SRR5644725	41	0	strain_sam	C57BL/6J
PRJNA382450	SRR5644730	45	0	strain_sam	C57BL/6J
PRJNA382450	SRR5644734	52	0	strain_sam	C57BL/6J
PRJNA382450	SRR5644743	16	0	strain_sam	C57BL/6J
PRJNA382450	SRR5644672	58	0	strain_sam	C57BL/6J
PRJNA382450	SRR5644693	31	0	strain_sam	C57BL/6J
PRJNA382450	SRR5644698	20	0	strain_sam	C57BL/6J
PRJNA382450	SRR5644699	53	0	strain_sam	C57BL/6J
PRJNA382450	SRR5644726	21	0	strain_sam	C57BL/6J
PRJNA382450	SRR5644740	14	0	strain_sam	C57BL/6J
PRJNA382685	SRR7058003	14	0	strain_sam	C57BL/6J
PRJNA382685	SRR7058006	15	0	strain_sam	C57BL/6J
PRJNA382685	SRR7058018	21	0	strain_sam	C57BL/6J
PRJNA382685	SRR7058021	18	0	strain_sam	C57BL/6J
PRJNA382685	SRR7058030	24	0	strain_sam	C57BL/6J
PRJNA382685	SRR7058036	16	0	strain_sam	C57BL/6J
PRJNA382685	SRR7058039	15	0	strain_sam	C57BL/6J
PRJNA382685	SRR7058042	10	0	strain_sam	C57BL/6J
PRJNA382685	SRR7058045	28	0	strain_sam	C57BL/6J
PRJNA382685	SRR7058009	26	0	strain_sam	C57BL/6J
PRJNA382685	SRR7058012	12	0	strain_sam	C57BL/6J
PRJNA382685	SRR7058015	35	0	strain_sam	C57BL/6J
PRJNA382685	SRR7058027	24	0	strain_sam	C57BL/6J
PRJNA384586	SRR5483642	21	0	strain_sam	C57BL/6J
PRJNA384586	SRR5483643	37	0	strain_sam	C57BL/6J
PRJNA384586	SRR5483644	35	0	strain_sam	C57BL/6J
PRJNA384586	SRR5483646	14	0	strain_sam	C57BL/6J
PRJNA384586	SRR5483647	26	0	strain_sam	C57BL/6J
PRJNA384586	SRR5483649	30	0	strain_sam	C57BL/6J
PRJNA384586	SRR5483650	21	0	strain_sam	C57BL/6J
PRJNA384586	SRR5483651	24	0	strain_sam	C57BL/6J
PRJNA384586	SRR5483652	24	0	strain_sam	C57BL/6J
PRJNA384586	SRR5483654	23	0	strain_sam	C57BL/6J
PRJNA384586	SRR5483655	17	0	strain_sam	C57BL/6J
PRJNA384586	SRR5483656	14	0	strain_sam	C57BL/6J
PRJNA384586	SRR5483657	17	0	strain_sam	C57BL/6J
PRJNA384586	SRR5483645	37	0	strain_sam	C57BL/6J
PRJNA384586	SRR5483653	18	0	strain_sam	C57BL/6J
PRJNA385269	SRR5500877	10	0	strain_sam	C57BL/6J
PRJNA385269	SRR5500878	14	0	strain_sam	C57BL/6J
PRJNA385694	SRR5514625	15	0	strain_background_sam	C57BL/6J
PRJNA385694	SRR5514631	11	0	strain_background_sam	C57BL/6J
PRJNA385694	SRR5514632	10	0	strain_background_sam	C57BL/6J
PRJNA385694	SRR5514637	13	0	strain_background_sam	C57BL/6J
PRJNA385694	SRR5514624	24	0	strain_background_sam	C57BL/6J
PRJNA385694	SRR5514626	26	0	strain_background_sam	C57BL/6J
PRJNA386381	SRR5533389	85	0	strain_sam	C57BL/6J
PRJNA386381	SRR5533390	76	0	strain_sam	C57BL/6J
PRJNA387609	SRR5589510	48	0	strain_sam	C57BL/6J
PRJNA387609	SRR5589511	51	0	strain_sam	C57BL/6J
PRJNA387609	SRR5589512	67	0	strain_sam	C57BL/6J
PRJNA387609	SRR5589513	46	0	strain_sam	C57BL/6J
PRJNA387609	SRR5589514	48	0	strain_sam	C57BL/6J
PRJNA387609	SRR5589515	52	0	strain_sam	C57BL/6J
PRJNA389641	SRR5667136	19	0	strain_sam	C57BL/6J
PRJNA389641	SRR5667142	20	0	strain_sam	C57BL/6J
PRJNA389641	SRR7360446	21	0	strain_sam	C57BL/6J
PRJNA389641	SRR5667114	31	0	strain_sam	C57BL/6J
PRJNA390541	SRR6292820	10	0	strain_sam	C57BL/6J
PRJNA390628	SRR5755772	12	0	strain_sam	C57BL/6J
PRJNA390642	SRR5687602	17	0	strain_sam	C57BL/6J
PRJNA390642	SRR5687603	13	0	strain_sam	C57BL/6J
PRJNA390642	SRR5687604	10	0	strain_sam	C57BL/6J
PRJNA390642	SRR5687605	15	0	strain_sam	C57BL/6J
PRJNA390642	SRR5687606	10	0	strain_sam	C57BL/6J
PRJNA393572	SRR5813834	14	0	strain_sam	C57BL/6J
PRJNA394115	SRR5822292	24	0	strain_sam	C57BL/6J
PRJNA394115	SRR5822293	12	0	strain_sam	C57BL/6J
PRJNA394115	SRR5822295	12	0	strain_sam	C57BL/6J
PRJNA394115	SRR5822296	12	0	strain_sam	C57BL/6J
PRJNA394115	SRR5822297	11	0	strain_sam	C57BL/6J
PRJNA397070	SRR8837472	22	0	strain_sam	C57BL/6J
PRJNA397070	SRR8837473	15	0	strain_sam	C57BL/6J
PRJNA397070	SRR8837474	21	0	strain_sam	C57BL/6J
PRJNA397070	SRR8837476	16	0	strain_sam	C57BL/6J
PRJNA397070	SRR8837477	20	0	strain_sam	C57BL/6J
PRJNA397070	SRR8837478	22	0	strain_sam	C57BL/6J
PRJNA397070	SRR8837479	10	0	strain_sam	C57BL/6J
PRJNA397070	SRR8837480	15	0	strain_sam	C57BL/6J
PRJNA397070	SRR8837481	12	0	strain_sam	C57BL/6J
PRJNA397070	SRR8837482	20	0	strain_sam	C57BL/6J
PRJNA397070	SRR8837483	17	0	strain_sam	C57BL/6J
PRJNA397070	SRR8837484	16	0	strain_sam	C57BL/6J
PRJNA397070	SRR8837485	19	0	strain_sam	C57BL/6J
PRJNA397070	SRR8837489	15	0	strain_sam	C57BL/6J
PRJNA397070	SRR8837490	29	0	strain_sam	C57BL/6J
PRJNA397216	SRR5901893	165	0	strain_sam	C57BL/6J
PRJNA397216	SRR5901899	180	0	strain_sam	C57BL/6J
PRJNA397216	SRR5901905	91	0	strain_sam	C57BL/6J
PRJNA397216	SRR5901911	225	0	strain_sam	C57BL/6J
PRJNA397216	SRR5901890	341	0	strain_sam	C57BL/6J
PRJNA397216	SRR5901891	356	0	strain_sam	C57BL/6J
PRJNA397216	SRR5901892	325	0	strain_sam	C57BL/6J
PRJNA397216	SRR5901895	344	0	strain_sam	C57BL/6J
PRJNA397216	SRR5901896	301	0	strain_sam	C57BL/6J
PRJNA397216	SRR5901897	398	0	strain_sam	C57BL/6J
PRJNA397216	SRR5901898	400	0	strain_sam	C57BL/6J
PRJNA397216	SRR5901901	262	0	strain_sam	C57BL/6J
PRJNA397216	SRR5901903	254	0	strain_sam	C57BL/6J
PRJNA397216	SRR5901904	170	0	strain_sam	C57BL/6J
PRJNA397216	SRR5901907	148	0	strain_sam	C57BL/6J
PRJNA397216	SRR5901908	138	0	strain_sam	C57BL/6J
PRJNA397216	SRR5901909	394	0	strain_sam	C57BL/6J
PRJNA397216	SRR5901910	457	0	strain_sam	C57BL/6J
PRJNA397216	SRR5901913	358	0	strain_sam	C57BL/6J
PRJNA397216	SRR5901914	350	0	strain_sam	C57BL/6J
PRJNA397216	SRR5901915	505	0	strain_sam	C57BL/6J
PRJNA397216	SRR5901916	409	0	strain_sam	C57BL/6J
PRJNA397216	SRR5901917	462	0	strain_sam	C57BL/6J
PRJNA397216	SRR5901918	432	0	strain_sam	C57BL/6J
PRJNA397216	SRR5901919	474	0	strain_sam	C57BL/6J
PRJNA397216	SRR5901920	375	0	strain_sam	C57BL/6J
PRJNA397216	SRR5901921	343	0	strain_sam	C57BL/6J
PRJNA397216	SRR5901922	413	0	strain_sam	C57BL/6J
PRJNA397216	SRR5901923	305	0	strain_sam	C57BL/6J
PRJNA397216	SRR5901924	343	0	strain_sam	C57BL/6J
PRJNA397216	SRR5901926	242	0	strain_sam	C57BL/6J
PRJNA397216	SRR5901927	216	0	strain_sam	C57BL/6J
PRJNA397216	SRR5901928	220	0	strain_sam	C57BL/6J
PRJNA399082	SRR6177895	76	0	strain_sam	C57BL/6J
PRJNA399082	SRR6177899	77	0	strain_sam	C57BL/6J
PRJNA399549	SRR5956653	19	0	strain_sam	C57BL/6J
PRJNA399549	SRR5956701	12	0	strain_sam	C57BL/6J
PRJNA399549	SRR5956705	10	0	strain_sam	C57BL/6J
PRJNA399549	SRR5956708	11	0	strain_sam	C57BL/6J
PRJNA399549	SRR5956721	13	0	strain_sam	C57BL/6J
PRJNA399549	SRR5956731	11	0	strain_sam	C57BL/6J
PRJNA399549	SRR5956739	10	0	strain_sam	C57BL/6J
PRJNA399549	SRR5956741	12	0	strain_sam	C57BL/6J
PRJNA399549	SRR5956914	11	0	strain_sam	C57BL/6J
PRJNA399549	SRR5957001	12	0	strain_sam	C57BL/6J
PRJNA399549	SRR5957007	10	0	strain_sam	C57BL/6J
PRJNA399549	SRR5956681	11	0	strain_sam	C57BL/6J
PRJNA400076	SRR5973193	48	0	strain_sam	C57BL/6J
PRJNA400076	SRR5973194	82	0	strain_sam	C57BL/6J
PRJNA400076	SRR5973195	46	0	strain_sam	C57BL/6J
PRJNA400076	SRR5973196	48	0	strain_sam	C57BL/6J
PRJNA400076	SRR5973197	52	0	strain_sam	C57BL/6J
PRJNA400076	SRR5973201	48	0	strain_sam	C57BL/6J
PRJNA400076	SRR5973203	67	0	strain_sam	C57BL/6J
PRJNA400076	SRR5973219	78	0	strain_sam	C57BL/6J
PRJNA400076	SRR5973221	61	0	strain_sam	C57BL/6J
PRJNA400076	SRR5973222	42	0	strain_sam	C57BL/6J
PRJNA400076	SRR5973223	28	0	strain_sam	C57BL/6J
PRJNA400076	SRR5973224	40	0	strain_sam	C57BL/6J
PRJNA400076	SRR5973225	51	0	strain_sam	C57BL/6J
PRJNA400076	SRR5973226	69	0	strain_sam	C57BL/6J
PRJNA400076	SRR5973227	58	0	strain_sam	C57BL/6J
PRJNA400076	SRR5973202	51	0	strain_sam	C57BL/6J
PRJNA400076	SRR5973220	69	0	strain_sam	C57BL/6J
PRJNA400234	SRR5979862	11	0	strain_sam	C57BL/6J
PRJNA400234	SRR5979870	12	0	strain_sam	C57BL/6J
PRJNA402050	SRR6014283	10	0	strain_sam	C57BL/6J
PRJNA402050	SRR6014284	10	0	strain_sam	C57BL/6J
PRJNA402050	SRR6014285	18	0	strain_sam	C57BL/6J
PRJNA402050	SRR6014286	32	0	strain_sam	C57BL/6J
PRJNA402050	SRR6014287	29	0	strain_sam	C57BL/6J
PRJNA402050	SRR6014288	19	0	strain_sam	C57BL/6J
PRJNA402050	SRR6014289	12	0	strain_sam	C57BL/6J
PRJNA402050	SRR6014290	19	0	strain_sam	C57BL/6J
PRJNA402050	SRR6014292	26	0	strain_sam	C57BL/6J
PRJNA402050	SRR6014293	17	0	strain_sam	C57BL/6J
PRJNA402050	SRR6014294	13	0	strain_sam	C57BL/6J
PRJNA404000	SRR6023976	25	0	strain_sam	C57BL/6J
PRJNA404000	SRR6023978	18	0	strain_sam	C57BL/6J
PRJNA404000	SRR6023980	52	0	strain_sam	C57BL/6J
PRJNA404000	SRR6023981	39	0	strain_sam	C57BL/6J
PRJNA404000	SRR6023982	15	0	strain_sam	C57BL/6J
PRJNA404000	SRR6023979	18	0	strain_sam	C57BL/6J
PRJNA407106	SRR6032290	20	0	strain_sam	C57BL/6J
PRJNA407106	SRR6032291	12	0	strain_sam	C57BL/6J
PRJNA407106	SRR6032292	23	0	strain_sam	C57BL/6J
PRJNA407106	SRR6032297	22	0	strain_sam	C57BL/6J
PRJNA407106	SRR6032299	25	0	strain_sam	C57BL/6J
PRJNA407106	SRR6032300	29	0	strain_sam	C57BL/6J
PRJNA407106	SRR6032301	20	0	strain_sam	C57BL/6J
PRJNA407106	SRR6032302	14	0	strain_sam	C57BL/6J
PRJNA407106	SRR6032303	18	0	strain_sam	C57BL/6J
PRJNA407106	SRR6032304	21	0	strain_sam	C57BL/6J
PRJNA407106	SRR6032305	23	0	strain_sam	C57BL/6J
PRJNA407106	SRR6032306	19	0	strain_sam	C57BL/6J
PRJNA407106	SRR6032307	18	0	strain_sam	C57BL/6J
PRJNA407106	SRR6032308	19	0	strain_sam	C57BL/6J
PRJNA407106	SRR6032309	25	0	strain_sam	C57BL/6J
PRJNA407106	SRR6032310	11	0	strain_sam	C57BL/6J
PRJNA407106	SRR6032311	14	0	strain_sam	C57BL/6J
PRJNA407106	SRR6032312	16	0	strain_sam	C57BL/6J
PRJNA407106	SRR6032313	23	0	strain_sam	C57BL/6J
PRJNA407106	SRR6032314	19	0	strain_sam	C57BL/6J
PRJNA407106	SRR6032315	25	0	strain_sam	C57BL/6J
PRJNA407106	SRR6032316	24	0	strain_sam	C57BL/6J
PRJNA407106	SRR6032317	20	0	strain_sam	C57BL/6J
PRJNA407106	SRR6032318	27	0	strain_sam	C57BL/6J
PRJNA407286	SRR6037887	11	0	strain_sam	C57BL/6J
PRJNA407286	SRR6037888	14	0	strain_sam	C57BL/6J
PRJNA407286	SRR6037895	11	0	strain_sam	C57BL/6J
PRJNA411950	SRR6150431	90	0	strain_sam	C57BL/6J
PRJNA411950	SRR6150432	71	0	strain_sam	C57BL/6J
PRJNA411950	SRR6150433	58	0	strain_sam	C57BL/6J
PRJNA411950	SRR6150435	71	0	strain_sam	C57BL/6J
PRJNA411950	SRR6150436	47	0	strain_sam	C57BL/6J
PRJNA411950	SRR6150437	63	0	strain_sam	C57BL/6J
PRJNA411950	SRR6150438	64	0	strain_sam	C57BL/6J
PRJNA411950	SRR6150439	83	0	strain_sam	C57BL/6J
PRJNA411950	SRR6150440	76	0	strain_sam	C57BL/6J
PRJNA411950	SRR6150441	75	0	strain_sam	C57BL/6J
PRJNA411950	SRR6150442	88	0	strain_sam	C57BL/6J
PRJNA411950	SRR6150443	46	0	strain_sam	C57BL/6J
PRJNA411950	SRR6150444	75	0	strain_sam	C57BL/6J
PRJNA411950	SRR6150445	58	0	strain_sam	C57BL/6J
PRJNA411989	SRR6067880	22	0	strain_sam	C57BL/6J
PRJNA412883	SRR6125821	76	0	strain_sam	C57BL/6J
PRJNA412883	SRR6125822	61	0	strain_sam	C57BL/6J
PRJNA413371	SRR6132581	95	0	background_strain_sam_s_dpl78	C57BL/6J
PRJNA413371	SRR6132582	126	0	background_strain_sam_s_dpl78	C57BL/6J
PRJNA413371	SRR6132583	144	0	background_strain_sam_s_dpl78	C57BL/6J
PRJNA413371	SRR6132584	137	0	background_strain_sam_s_dpl78	C57BL/6J
PRJNA413371	SRR6132585	113	0	background_strain_sam_s_dpl78	C57BL/6J
PRJNA413371	SRR6132586	80	0	background_strain_sam_s_dpl78	C57BL/6J
PRJNA413371	SRR6132588	129	0	background_strain_sam_s_dpl78	C57BL/6J
PRJNA413371	SRR6132589	125	0	background_strain_sam_s_dpl78	C57BL/6J
PRJNA413371	SRR6132590	139	0	background_strain_sam_s_dpl78	C57BL/6J
PRJNA413371	SRR6132594	109	0	background_strain_sam_s_dpl78	C57BL/6J
PRJNA413371	SRR6132595	108	0	background_strain_sam_s_dpl78	C57BL/6J
PRJNA413371	SRR6132599	62	0	background_strain_sam_s_dpl78	C57BL/6J
PRJNA413371	SRR6132600	101	0	background_strain_sam_s_dpl78	C57BL/6J
PRJNA413371	SRR6132602	94	0	background_strain_sam_s_dpl78	C57BL/6J
PRJNA413371	SRR6132603	103	0	background_strain_sam_s_dpl78	C57BL/6J
PRJNA413371	SRR6132604	133	0	background_strain_sam_s_dpl78	C57BL/6J
PRJNA413371	SRR6132607	105	0	background_strain_sam_s_dpl78	C57BL/6J
PRJNA413371	SRR6132608	101	0	background_strain_sam_s_dpl78	C57BL/6J
PRJNA413371	SRR6132609	88	0	background_strain_sam_s_dpl78	C57BL/6J
PRJNA413371	SRR6132610	74	0	background_strain_sam_s_dpl78	C57BL/6J
PRJNA413371	SRR6132612	95	0	background_strain_sam_s_dpl78	C57BL/6J
PRJNA413371	SRR6132614	143	0	background_strain_sam_s_dpl78	C57BL/6J
PRJNA413371	SRR6132615	79	0	background_strain_sam_s_dpl78	C57BL/6J
PRJNA413371	SRR6132616	129	0	background_strain_sam_s_dpl78	C57BL/6J
PRJNA413371	SRR6132617	100	0	background_strain_sam_s_dpl78	C57BL/6J
PRJNA413371	SRR6132580	66	0	background_strain_sam_s_dpl78	C57BL/6J
PRJNA413371	SRR6132587	184	0	background_strain_sam_s_dpl78	C57BL/6J
PRJNA413371	SRR6132592	165	0	background_strain_sam_s_dpl78	C57BL/6J
PRJNA413371	SRR6132593	130	0	background_strain_sam_s_dpl78	C57BL/6J
PRJNA413371	SRR6132598	178	0	background_strain_sam_s_dpl78	C57BL/6J
PRJNA413371	SRR6132601	70	0	background_strain_sam_s_dpl78	C57BL/6J
PRJNA413371	SRR6132605	117	0	background_strain_sam_s_dpl78	C57BL/6J
PRJNA413371	SRR6132606	169	0	background_strain_sam_s_dpl78	C57BL/6J
PRJNA413371	SRR6132613	149	0	background_strain_sam_s_dpl78	C57BL/6J
PRJNA413371	SRR6132618	102	0	background_strain_sam_s_dpl78	C57BL/6J
PRJNA414079	SRR6163916	16	0	strain_sam	C57BL/6J
PRJNA414079	SRR6163922	10	0	strain_sam	C57BL/6J
PRJNA414079	SRR6163928	13	0	strain_sam	C57BL/6J
PRJNA414079	SRR6163934	17	0	strain_sam	C57BL/6J
PRJNA414079	SRR6163964	12	0	strain_sam	C57BL/6J
PRJNA414079	SRR6163970	17	0	strain_sam	C57BL/6J
PRJNA414079	SRR6163976	12	0	strain_sam	C57BL/6J
PRJNA414079	SRR6163982	15	0	strain_sam	C57BL/6J
PRJNA414079	SRR6163994	12	0	strain_sam	C57BL/6J
PRJNA414079	SRR6164000	12	0	strain_sam	C57BL/6J
PRJNA414079	SRR6164006	15	0	strain_sam	C57BL/6J
PRJNA414079	SRR6164018	14	0	strain_sam	C57BL/6J
PRJNA414079	SRR6164030	19	0	strain_sam	C57BL/6J
PRJNA414079	SRR6164054	16	0	strain_sam	C57BL/6J
PRJNA414079	SRR6164060	17	0	strain_sam	C57BL/6J
PRJNA414079	SRR6164066	10	0	strain_sam	C57BL/6J
PRJNA414079	SRR6163940	16	0	strain_sam	C57BL/6J
PRJNA414079	SRR6164048	12	0	strain_sam	C57BL/6J
PRJNA414476	SRR6178915	34	0	strain_sam	C57BL/6J
PRJNA414476	SRR6178916	16	0	strain_sam	C57BL/6J
PRJNA414476	SRR6178918	37	0	strain_sam	C57BL/6J
PRJNA414476	SRR6178919	20	0	strain_sam	C57BL/6J
PRJNA414476	SRR6178920	17	0	strain_sam	C57BL/6J
PRJNA414476	SRR6178921	24	0	strain_sam	C57BL/6J
PRJNA414476	SRR6178917	25	0	strain_sam	C57BL/6J
PRJNA417392	SRR7146511	21	0	strain_sam	C57BL/6J
PRJNA417392	SRR7146510	22	0	strain_sam	C57BL/6J
PRJNA417562	SRR6266968	12	0	strain_sam	C57BL/6J
PRJNA417562	SRR6267027	52	0	strain_sam	C57BL/6J
PRJNA417562	SRR6267126	82	0	strain_sam	C57BL/6J
PRJNA417562	SRR6267075	16	0	strain_sam	C57BL/6J
PRJNA419007	SRR6305407	17	0	strain_sam	C57BL/6J
PRJNA419007	SRR6305412	12	0	strain_sam	C57BL/6J
PRJNA420348	SRR6329207	18	0	strain_sam	C57BL/6J
PRJNA420348	SRR6329208	10	0	strain_sam	C57BL/6J
PRJNA420348	SRR6329210	15	0	strain_sam	C57BL/6J
PRJNA420348	SRR6329212	27	0	strain_sam	C57BL/6J
PRJNA420348	SRR6329213	18	0	strain_sam	C57BL/6J
PRJNA420348	SRR6329215	15	0	strain_sam	C57BL/6J
PRJNA420348	SRR6329216	12	0	strain_sam	C57BL/6J
PRJNA420348	SRR6329217	28	0	strain_sam	C57BL/6J
PRJNA420348	SRR6329218	23	0	strain_sam	C57BL/6J
PRJNA420938	SRR6340194	45	0	strain_background_sam_s_dpl381	C57BL/6J
PRJNA420938	SRR6340200	13	0	strain_background_sam_s_dpl381	C57BL/6J
PRJNA421205	SRR7760304	12	0	strain_sam	C57BL/6J
PRJNA421205	SRR7760313	45	0	strain_sam	C57BL/6J
PRJNA421205	SRR7760339	62	0	strain_sam	C57BL/6J
PRJNA421205	SRR7760340	36	0	strain_sam	C57BL/6J
PRJNA421205	SRR7760349	35	0	strain_sam	C57BL/6J
PRJNA421205	SRR7760352	73	0	strain_sam	C57BL/6J
PRJNA421205	SRR7760354	11	0	strain_sam	C57BL/6J
PRJNA421205	SRR7760355	79	0	strain_sam	C57BL/6J
PRJNA421205	SRR7760356	147	0	strain_sam	C57BL/6J
PRJNA421205	SRR7760358	126	0	strain_sam	C57BL/6J
PRJNA421205	SRR7760359	89	0	strain_sam	C57BL/6J
PRJNA421205	SRR7760361	40	0	strain_sam	C57BL/6J
PRJNA421205	SRR7760364	44	0	strain_sam	C57BL/6J
PRJNA421205	SRR7760371	61	0	strain_sam	C57BL/6J
PRJNA421205	SRR7760372	89	0	strain_sam	C57BL/6J
PRJNA421205	SRR7760376	99	0	strain_sam	C57BL/6J
PRJNA421205	SRR7760303	147	0	strain_sam	C57BL/6J
PRJNA421205	SRR7760311	131	0	strain_sam	C57BL/6J
PRJNA421205	SRR7760324	12	0	strain_sam	C57BL/6J
PRJNA421205	SRR7760351	19	0	strain_sam	C57BL/6J
PRJNA421660	SRR6361238	11	0	strain_sam	C57BL/6J
PRJNA421660	SRR6361243	11	0	strain_sam	C57BL/6J
PRJNA421660	SRR6361230	14	0	strain_sam	C57BL/6J
PRJNA421660	SRR6361231	28	0	strain_sam	C57BL/6J
PRJNA422411	SRR6376407	10	0	strain_sam	C57BL/6J
PRJNA422411	SRR6376414	19	0	strain_sam	C57BL/6J
PRJNA422411	SRR6376417	21	0	strain_sam	C57BL/6J
PRJNA422411	SRR6376418	27	0	strain_sam	C57BL/6J
PRJNA423245	SRR6396678	11	0	strain_sam	C57BL/6J
PRJNA427346	SRR6413679	12	0	strain_sam	C57BL/6J
PRJNA427346	SRR6413682	64	0	strain_sam	C57BL/6J
PRJNA427346	SRR6413684	27	0	strain_sam	C57BL/6J
PRJNA427396	SRR6491696	10	0	strain_sam	C57BL/6J
PRJNA427396	SRR6491698	14	0	strain_sam	C57BL/6J
PRJNA427707	SRR6425143	21	0	strain_sam	C57BL/6J
PRJNA427707	SRR6425149	13	0	strain_sam	C57BL/6J
PRJNA427707	SRR6425158	11	0	strain_sam	C57BL/6J
PRJNA427712	SRR6425264	30	0	strain_sam	C57BL/6J
PRJNA427712	SRR6425272	49	0	strain_sam	C57BL/6J
PRJNA427712	SRR6425276	36	0	strain_sam	C57BL/6J
PRJNA427712	SRR6425280	63	0	strain_sam	C57BL/6J
PRJNA427712	SRR6425288	47	0	strain_sam	C57BL/6J
PRJNA427712	SRR6425296	51	0	strain_sam	C57BL/6J
PRJNA427712	SRR6425300	24	0	strain_sam	C57BL/6J
PRJNA427712	SRR6425260	53	0	strain_sam	C57BL/6J
PRJNA427712	SRR6425268	29	0	strain_sam	C57BL/6J
PRJNA427712	SRR6425284	44	0	strain_sam	C57BL/6J
PRJNA427712	SRR6425292	36	0	strain_sam	C57BL/6J
PRJNA428925	SRR6493955	65	0	strain_sam	C57BL/6J
PRJNA428925	SRR6493956	65	0	strain_sam	C57BL/6J
PRJNA428925	SRR6493957	58	0	strain_sam	C57BL/6J
PRJNA428925	SRR6493958	26	0	strain_sam	C57BL/6J
PRJNA428925	SRR6493960	26	0	strain_sam	C57BL/6J
PRJNA428925	SRR6493961	14	0	strain_sam	C57BL/6J
PRJNA428925	SRR6493962	14	0	strain_sam	C57BL/6J
PRJNA428925	SRR6493963	20	0	strain_sam	C57BL/6J
PRJNA428925	SRR6493964	30	0	strain_sam	C57BL/6J
PRJNA428925	SRR6493965	20	0	strain_sam	C57BL/6J
PRJNA428925	SRR6493966	30	0	strain_sam	C57BL/6J
PRJNA429735	SRR10060966	10	0	strain_sam	C57BL/6J
PRJNA429735	SRR10060969	20	0	strain_sam	C57BL/6J
PRJNA429735	SRR10060970	27	0	strain_sam	C57BL/6J
PRJNA429735	SRR10060974	11	0	strain_sam	C57BL/6J
PRJNA429735	SRR10060976	10	0	strain_sam	C57BL/6J
PRJNA429735	SRR10060978	17	0	strain_sam	C57BL/6J
PRJNA429735	SRR10060980	28	0	strain_sam	C57BL/6J
PRJNA429735	SRR10060982	22	0	strain_sam	C57BL/6J
PRJNA429735	SRR10691503	28	0	strain_sam	C57BL/6J
PRJNA429735	SRR10691505	17	0	strain_sam	C57BL/6J
PRJNA429735	SRR10691506	22	0	strain_sam	C57BL/6J
PRJNA429735	SRR10691507	20	0	strain_sam	C57BL/6J
PRJNA429735	SRR10691509	11	0	strain_sam	C57BL/6J
PRJNA429735	SRR10691510	26	0	strain_sam	C57BL/6J
PRJNA429735	SRR10691511	26	0	strain_sam	C57BL/6J
PRJNA429735	SRR10691512	30	0	strain_sam	C57BL/6J
PRJNA429735	SRR10691513	26	0	strain_sam	C57BL/6J
PRJNA429735	SRR10691514	16	0	strain_sam	C57BL/6J
PRJNA429735	SRR10691515	12	0	strain_sam	C57BL/6J
PRJNA429735	SRR10060972	14	0	strain_sam	C57BL/6J
PRJNA429735	SRR10060973	31	0	strain_sam	C57BL/6J
PRJNA432094	SRR6652389	11	0	strain_background_sam_s_dpl381	C57BL/6J
PRJNA432094	SRR6652391	10	0	strain_background_sam_s_dpl381	C57BL/6J
PRJNA432094	SRR6652397	14	0	strain_background_sam_s_dpl381	C57BL/6J
PRJNA432094	SRR6652403	15	0	strain_background_sam_s_dpl381	C57BL/6J
PRJNA432094	SRR6652405	10	0	strain_background_sam_s_dpl381	C57BL/6J
PRJNA432094	SRR6652407	11	0	strain_background_sam_s_dpl381	C57BL/6J
PRJNA432094	SRR6652409	13	0	strain_background_sam_s_dpl381	C57BL/6J
PRJNA432094	SRR6652413	17	0	strain_background_sam_s_dpl381	C57BL/6J
PRJNA432094	SRR6652417	19	0	strain_background_sam_s_dpl381	C57BL/6J
PRJNA432094	SRR6652421	15	0	strain_background_sam_s_dpl381	C57BL/6J
PRJNA432094	SRR6652423	18	0	strain_background_sam_s_dpl381	C57BL/6J
PRJNA432094	SRR6652427	18	0	strain_background_sam_s_dpl381	C57BL/6J
PRJNA432094	SRR6652429	22	0	strain_background_sam_s_dpl381	C57BL/6J
PRJNA432094	SRR6652435	14	0	strain_background_sam_s_dpl381	C57BL/6J
PRJNA432094	SRR6652439	16	0	strain_background_sam_s_dpl381	C57BL/6J
PRJNA432094	SRR6652441	18	0	strain_background_sam_s_dpl381	C57BL/6J
PRJNA432094	SRR6652445	15	0	strain_background_sam_s_dpl381	C57BL/6J
PRJNA432094	SRR6652447	10	0	strain_background_sam_s_dpl381	C57BL/6J
PRJNA432094	SRR6652449	14	0	strain_background_sam_s_dpl381	C57BL/6J
PRJNA432094	SRR6652451	11	0	strain_background_sam_s_dpl381	C57BL/6J
PRJNA432094	SRR6652453	14	0	strain_background_sam_s_dpl381	C57BL/6J
PRJNA432094	SRR6652457	16	0	strain_background_sam_s_dpl381	C57BL/6J
PRJNA432094	SRR6652461	13	0	strain_background_sam_s_dpl381	C57BL/6J
PRJNA432094	SRR6652465	12	0	strain_background_sam_s_dpl381	C57BL/6J
PRJNA432094	SRR6652471	13	0	strain_background_sam_s_dpl381	C57BL/6J
PRJNA432094	SRR6652473	10	0	strain_background_sam_s_dpl381	C57BL/6J
PRJNA432094	SRR6652475	14	0	strain_background_sam_s_dpl381	C57BL/6J
PRJNA432094	SRR6652477	13	0	strain_background_sam_s_dpl381	C57BL/6J
PRJNA432094	SRR6652485	17	0	strain_background_sam_s_dpl381	C57BL/6J
PRJNA432094	SRR6652487	11	0	strain_background_sam_s_dpl381	C57BL/6J
PRJNA432094	SRR6652491	16	0	strain_background_sam_s_dpl381	C57BL/6J
PRJNA432094	SRR6652493	11	0	strain_background_sam_s_dpl381	C57BL/6J
PRJNA432094	SRR6652501	12	0	strain_background_sam_s_dpl381	C57BL/6J
PRJNA432094	SRR6652503	25	0	strain_background_sam_s_dpl381	C57BL/6J
PRJNA432094	SRR6652505	11	0	strain_background_sam_s_dpl381	C57BL/6J
PRJNA432094	SRR6652509	14	0	strain_background_sam_s_dpl381	C57BL/6J
PRJNA432094	SRR6652511	18	0	strain_background_sam_s_dpl381	C57BL/6J
PRJNA432094	SRR6652517	20	0	strain_background_sam_s_dpl381	C57BL/6J
PRJNA432094	SRR6652521	10	0	strain_background_sam_s_dpl381	C57BL/6J
PRJNA432094	SRR6652523	12	0	strain_background_sam_s_dpl381	C57BL/6J
PRJNA432094	SRR6652411	12	0	strain_background_sam_s_dpl381	C57BL/6J
PRJNA432094	SRR6652415	22	0	strain_background_sam_s_dpl381	C57BL/6J
PRJNA432094	SRR6652437	23	0	strain_background_sam_s_dpl381	C57BL/6J
PRJNA432094	SRR6652443	14	0	strain_background_sam_s_dpl381	C57BL/6J
PRJNA432094	SRR6652483	12	0	strain_background_sam_s_dpl381	C57BL/6J
PRJNA432094	SRR6652497	11	0	strain_background_sam_s_dpl381	C57BL/6J
PRJNA432094	SRR6652525	14	0	strain_background_sam_s_dpl381	C57BL/6J
PRJNA432128	SRR6660735	47	0	ecotype_sam	C57BL/6J
PRJNA432435	SRR6660262	22	0	strain_sam	C57BL/6J
PRJNA432435	SRR6660263	17	0	strain_sam	C57BL/6J
PRJNA432435	SRR6660266	13	0	strain_sam	C57BL/6J
PRJNA432435	SRR6660267	104	0	strain_sam	C57BL/6J
PRJNA432435	SRR6660268	41	0	strain_sam	C57BL/6J
PRJNA432543	SRR6662096	12	0	strain_sam	C57BL/6J
PRJNA432543	SRR6662116	11	0	strain_sam	C57BL/6J
PRJNA432561	SRR6663162	17	0	strain_sam	C57BL/6J
PRJNA432595	SRR6664295	18	0	strain_sam	C57BL/6J
PRJNA432595	SRR6664299	12	0	strain_sam	C57BL/6J
PRJNA432595	SRR6664301	13	0	strain_sam	C57BL/6J
PRJNA432595	SRR6664309	18	0	strain_sam	C57BL/6J
PRJNA432595	SRR6664297	14	0	strain_sam	C57BL/6J
PRJNA433508	SRR6687790	17	0	strain_sam	C57BL/6J
PRJNA433508	SRR6688055	41	0	strain_sam	C57BL/6J
PRJNA433508	SRR6688408	35	0	strain_sam	C57BL/6J
PRJNA433508	SRR6688898	28	0	strain_sam	C57BL/6J
PRJNA433508	SRR6689381	24	0	strain_sam	C57BL/6J
PRJNA434380	SRR6753801	26	0	strain_sam	C57BL/6J
PRJNA434380	SRR6753816	83	0	strain_sam	C57BL/6J
PRJNA434380	SRR6753817	16	0	strain_sam	C57BL/6J
PRJNA434380	SRR6753818	49	0	strain_sam	C57BL/6J
PRJNA434380	SRR6753819	86	0	strain_sam	C57BL/6J
PRJNA434380	SRR6753820	82	0	strain_sam	C57BL/6J
PRJNA434380	SRR6753821	95	0	strain_sam	C57BL/6J
PRJNA434380	SRR6753822	107	0	strain_sam	C57BL/6J
PRJNA434380	SRR6753823	88	0	strain_sam	C57BL/6J
PRJNA434380	SRR6753841	87	0	strain_sam	C57BL/6J
PRJNA437488	SRR6819421	21	0	strain_sam	C57BL/6J
PRJNA437488	SRR6819429	20	0	strain_sam	C57BL/6J
PRJNA437488	SRR6819431	26	0	strain_sam	C57BL/6J
PRJNA437488	SRR6819439	19	0	strain_sam	C57BL/6J
PRJNA437488	SRR6819440	28	0	strain_sam	C57BL/6J
PRJNA437488	SRR6819441	15	0	strain_sam	C57BL/6J
PRJNA437488	SRR6819442	22	0	strain_sam	C57BL/6J
PRJNA437488	SRR6819446	23	0	strain_sam	C57BL/6J
PRJNA437488	SRR6819447	17	0	strain_sam	C57BL/6J
PRJNA437488	SRR6819451	11	0	strain_sam	C57BL/6J
PRJNA437488	SRR6819456	13	0	strain_sam	C57BL/6J
PRJNA438296	SRR6833752	86	0	strain_sam	C57BL/6J
PRJNA438296	SRR6833754	39	0	strain_sam	C57BL/6J
PRJNA438296	SRR6833755	33	0	strain_sam	C57BL/6J
PRJNA438296	SRR6833756	82	0	strain_sam	C57BL/6J
PRJNA438296	SRR6833758	52	0	strain_sam	C57BL/6J
PRJNA438296	SRR6833759	17	0	strain_sam	C57BL/6J
PRJNA438296	SRR6833760	97	0	strain_sam	C57BL/6J
PRJNA438296	SRR6833761	112	0	strain_sam	C57BL/6J
PRJNA438296	SRR6833762	63	0	strain_sam	C57BL/6J
PRJNA438296	SRR6833763	75	0	strain_sam	C57BL/6J
PRJNA438296	SRR6833764	35	0	strain_sam	C57BL/6J
PRJNA438296	SRR6833766	93	0	strain_sam	C57BL/6J
PRJNA438296	SRR6833767	26	0	strain_sam	C57BL/6J
PRJNA438296	SRR6833768	88	0	strain_sam	C57BL/6J
PRJNA438296	SRR6833769	75	0	strain_sam	C57BL/6J
PRJNA438296	SRR6833770	99	0	strain_sam	C57BL/6J
PRJNA438296	SRR6833771	45	0	strain_sam	C57BL/6J
PRJNA438296	SRR6833772	53	0	strain_sam	C57BL/6J
PRJNA438296	SRR6833773	74	0	strain_sam	C57BL/6J
PRJNA438296	SRR6833774	59	0	strain_sam	C57BL/6J
PRJNA438296	SRR6833775	86	0	strain_sam	C57BL/6J
PRJNA438927	SRR6855577	11	0	strain_sam	C57BL/6J
PRJNA438927	SRR6855581	13	0	strain_sam	C57BL/6J
PRJNA438927	SRR6855583	14	0	strain_sam	C57BL/6J
PRJNA438927	SRR6855584	12	0	strain_sam	C57BL/6J
PRJNA445882	SRR6904747	47	0	strain_sam	C57BL/6J
PRJNA445882	SRR6904748	70	0	strain_sam	C57BL/6J
PRJNA445882	SRR6904749	48	0	strain_sam	C57BL/6J
PRJNA445882	SRR6904750	68	0	strain_sam	C57BL/6J
PRJNA445882	SRR6904751	56	0	strain_sam	C57BL/6J
PRJNA445882	SRR6904752	62	0	strain_sam	C57BL/6J
PRJNA445882	SRR6904753	57	0	strain_sam	C57BL/6J
PRJNA445882	SRR6904754	85	0	strain_sam	C57BL/6J
PRJNA445882	SRR6904755	54	0	strain_sam	C57BL/6J
PRJNA445882	SRR6904757	54	0	strain_sam	C57BL/6J
PRJNA445882	SRR6904758	69	0	strain_sam	C57BL/6J
PRJNA445882	SRR6904759	35	0	strain_sam	C57BL/6J
PRJNA445882	SRR6904760	49	0	strain_sam	C57BL/6J
PRJNA445882	SRR6904761	31	0	strain_sam	C57BL/6J
PRJNA445882	SRR6904762	47	0	strain_sam	C57BL/6J
PRJNA445882	SRR6904763	68	0	strain_sam	C57BL/6J
PRJNA445882	SRR6904764	51	0	strain_sam	C57BL/6J
PRJNA445882	SRR8080990	78	0	strain_sam	C57BL/6J
PRJNA445882	SRR8080991	78	0	strain_sam	C57BL/6J
PRJNA445882	SRR8080992	97	0	strain_sam	C57BL/6J
PRJNA445882	SRR8080993	48	0	strain_sam	C57BL/6J
PRJNA445882	SRR8080994	75	0	strain_sam	C57BL/6J
PRJNA445882	SRR8080995	49	0	strain_sam	C57BL/6J
PRJNA448448	SRR6927752	18	0	strain_sam	C57BL/6J
PRJNA448448	SRR6927753	14	0	strain_sam	C57BL/6J
PRJNA448448	SRR6927757	16	0	strain_sam	C57BL/6J
PRJNA449550	SRR6979433	38	0	strain_sam	C57BL/6J
PRJNA449550	SRR6979434	43	0	strain_sam	C57BL/6J
PRJNA449550	SRR6979435	34	0	strain_sam	C57BL/6J
PRJNA449550	SRR6979437	44	0	strain_sam	C57BL/6J
PRJNA449550	SRR6979438	28	0	strain_sam	C57BL/6J
PRJNA449550	SRR6979439	45	0	strain_sam	C57BL/6J
PRJNA449550	SRR6979440	48	0	strain_sam	C57BL/6J
PRJNA449550	SRR6979441	28	0	strain_sam	C57BL/6J
PRJNA449550	SRR6979442	33	0	strain_sam	C57BL/6J
PRJNA449550	SRR6979443	40	0	strain_sam	C57BL/6J
PRJNA449550	SRR6979444	43	0	strain_sam	C57BL/6J
PRJNA449550	SRR6979445	41	0	strain_sam	C57BL/6J
PRJNA449550	SRR6979446	46	0	strain_sam	C57BL/6J
PRJNA449550	SRR6979447	76	0	strain_sam	C57BL/6J
PRJNA449550	SRR6979448	42	0	strain_sam	C57BL/6J
PRJNA449550	SRR6979449	54	0	strain_sam	C57BL/6J
PRJNA449550	SRR6979450	26	0	strain_sam	C57BL/6J
PRJNA449550	SRR6979451	42	0	strain_sam	C57BL/6J
PRJNA449550	SRR6979452	52	0	strain_sam	C57BL/6J
PRJNA449550	SRR6979453	35	0	strain_sam	C57BL/6J
PRJNA449550	SRR6979454	30	0	strain_sam	C57BL/6J
PRJNA449550	SRR6979455	43	0	strain_sam	C57BL/6J
PRJNA449550	SRR6979456	50	0	strain_sam	C57BL/6J
PRJNA449550	SRR6979457	39	0	strain_sam	C57BL/6J
PRJNA449550	SRR6979458	40	0	strain_sam	C57BL/6J
PRJNA449550	SRR6979459	39	0	strain_sam	C57BL/6J
PRJNA449550	SRR6979461	31	0	strain_sam	C57BL/6J
PRJNA449550	SRR6979464	47	0	strain_sam	C57BL/6J
PRJNA449550	SRR6979465	55	0	strain_sam	C57BL/6J
PRJNA449550	SRR6979467	108	0	strain_sam	C57BL/6J
PRJNA449550	SRR6979468	137	0	strain_sam	C57BL/6J
PRJNA449550	SRR6979470	123	0	strain_sam	C57BL/6J
PRJNA449550	SRR6979471	68	0	strain_sam	C57BL/6J
PRJNA449550	SRR6979472	98	0	strain_sam	C57BL/6J
PRJNA449550	SRR6979473	91	0	strain_sam	C57BL/6J
PRJNA449550	SRR6979474	102	0	strain_sam	C57BL/6J
PRJNA449550	SRR6979475	57	0	strain_sam	C57BL/6J
PRJNA449550	SRR6979476	87	0	strain_sam	C57BL/6J
PRJNA449550	SRR6979477	63	0	strain_sam	C57BL/6J
PRJNA449550	SRR6979478	66	0	strain_sam	C57BL/6J
PRJNA449550	SRR6979479	43	0	strain_sam	C57BL/6J
PRJNA449550	SRR6979480	66	0	strain_sam	C57BL/6J
PRJNA449550	SRR6979481	53	0	strain_sam	C57BL/6J
PRJNA449550	SRR6979482	57	0	strain_sam	C57BL/6J
PRJNA449550	SRR6979483	139	0	strain_sam	C57BL/6J
PRJNA449550	SRR6979484	114	0	strain_sam	C57BL/6J
PRJNA449550	SRR6979485	122	0	strain_sam	C57BL/6J
PRJNA449550	SRR6979486	152	0	strain_sam	C57BL/6J
PRJNA449550	SRR6979487	128	0	strain_sam	C57BL/6J
PRJNA449550	SRR6979488	133	0	strain_sam	C57BL/6J
PRJNA449550	SRR6979489	129	0	strain_sam	C57BL/6J
PRJNA449550	SRR6979490	134	0	strain_sam	C57BL/6J
PRJNA449550	SRR6979491	76	0	strain_sam	C57BL/6J
PRJNA449550	SRR6979492	76	0	strain_sam	C57BL/6J
PRJNA449550	SRR6979494	87	0	strain_sam	C57BL/6J
PRJNA449550	SRR6979496	96	0	strain_sam	C57BL/6J
PRJNA449550	SRR6979497	70	0	strain_sam	C57BL/6J
PRJNA449550	SRR6979498	77	0	strain_sam	C57BL/6J
PRJNA449550	SRR6979499	65	0	strain_sam	C57BL/6J
PRJNA449550	SRR6979500	71	0	strain_sam	C57BL/6J
PRJNA449667	SRR6983497	73	0	strain_sam	C57BL/6J
PRJNA450860	SRR7030853	14	0	strain_sam	C57BL/6J
PRJNA450860	SRR7030861	25	0	strain_sam	C57BL/6J
PRJNA450860	SRR7030869	19	0	strain_sam	C57BL/6J
PRJNA450860	SRR7030877	12	0	strain_sam	C57BL/6J
PRJNA450860	SRR7030885	20	0	strain_sam	C57BL/6J
PRJNA450860	SRR7030893	12	0	strain_sam	C57BL/6J
PRJNA450860	SRR7030925	12	0	strain_sam	C57BL/6J
PRJNA453187	SRR7059301	33	0	strain_sam	C57BL/6J
PRJNA453187	SRR7059302	21	0	strain_sam	C57BL/6J
PRJNA453187	SRR7059303	14	0	strain_sam	C57BL/6J
PRJNA453187	SRR7059304	11	0	strain_sam	C57BL/6J
PRJNA453187	SRR7059305	27	0	strain_sam	C57BL/6J
PRJNA453187	SRR7059306	17	0	strain_sam	C57BL/6J
PRJNA453187	SRR7059330	11	0	strain_sam	C57BL/6J
PRJNA453187	SRR7059335	10	0	strain_sam	C57BL/6J
PRJNA466152	SRR7138590	12	0	breed_sam	C57BL/6J
PRJNA466152	SRR7138593	18	0	breed_sam	C57BL/6J
PRJNA466152	SRR7138598	31	0	breed_sam	C57BL/6J
PRJNA466152	SRR8741953	23	0	breed_sam	C57BL/6J
PRJNA471296	SRR7162073	15	0	strain_sam	C57BL/6J
PRJNA471296	SRR7162105	23	0	strain_sam	C57BL/6J
PRJNA471296	SRR7162177	14	0	strain_sam	C57BL/6J
PRJNA471297	SRR7161809	34	0	strain_sam	C57BL/6J
PRJNA471297	SRR7161817	43	0	strain_sam	C57BL/6J
PRJNA471297	SRR7161841	36	0	strain_sam	C57BL/6J
PRJNA471297	SRR7161849	43	0	strain_sam	C57BL/6J
PRJNA471297	SRR7161857	47	0	strain_sam	C57BL/6J
PRJNA471297	SRR7161865	33	0	strain_sam	C57BL/6J
PRJNA471297	SRR7161873	31	0	strain_sam	C57BL/6J
PRJNA471297	SRR7161881	44	0	strain_sam	C57BL/6J
PRJNA471297	SRR7161889	45	0	strain_sam	C57BL/6J
PRJNA471297	SRR7161913	61	0	strain_sam	C57BL/6J
PRJNA471297	SRR7161921	32	0	strain_sam	C57BL/6J
PRJNA471297	SRR7161929	53	0	strain_sam	C57BL/6J
PRJNA471297	SRR7161937	44	0	strain_sam	C57BL/6J
PRJNA471297	SRR7161945	36	0	strain_sam	C57BL/6J
PRJNA471297	SRR7161961	33	0	strain_sam	C57BL/6J
PRJNA471297	SRR7161969	52	0	strain_sam	C57BL/6J
PRJNA471297	SRR7161977	54	0	strain_sam	C57BL/6J
PRJNA471297	SRR7162017	51	0	strain_sam	C57BL/6J
PRJNA471297	SRR7162025	38	0	strain_sam	C57BL/6J
PRJNA471298	SRR7161345	28	0	strain_sam	C57BL/6J
PRJNA471298	SRR7161545	13	0	strain_sam	C57BL/6J
PRJNA471299	SRR7162209	55	0	strain_sam	C57BL/6J
PRJNA471299	SRR7162217	51	0	strain_sam	C57BL/6J
PRJNA471299	SRR7162225	36	0	strain_sam	C57BL/6J
PRJNA471299	SRR7162241	66	0	strain_sam	C57BL/6J
PRJNA471299	SRR7162249	38	0	strain_sam	C57BL/6J
PRJNA471299	SRR7162265	51	0	strain_sam	C57BL/6J
PRJNA471299	SRR7162273	36	0	strain_sam	C57BL/6J
PRJNA471299	SRR7162281	31	0	strain_sam	C57BL/6J
PRJNA471853	SRR7178166	12	0	strain_sam	C57BL/6J
PRJNA471853	SRR7178167	15	0	strain_sam	C57BL/6J
PRJNA471853	SRR7178168	11	0	strain_sam	C57BL/6J
PRJNA471853	SRR7178171	15	0	strain_sam	C57BL/6J
PRJNA471853	SRR7178172	13	0	strain_sam	C57BL/6J
PRJNA471853	SRR7178173	12	0	strain_sam	C57BL/6J
PRJNA471912	SRR7181085	25	0	strain_sam	C57BL/6J
PRJNA471912	SRR7181093	21	0	strain_sam	C57BL/6J
PRJNA471912	SRR7181101	22	0	strain_sam	C57BL/6J
PRJNA471912	SRR7181110	24	0	strain_sam	C57BL/6J
PRJNA471912	SRR7181159	35	0	strain_sam	C57BL/6J
PRJNA471912	SRR7181167	41	0	strain_sam	C57BL/6J
PRJNA471912	SRR7181175	46	0	strain_sam	C57BL/6J
PRJNA471912	SRR7181183	36	0	strain_sam	C57BL/6J
PRJNA471992	SRR7182237	15	0	strain_sam	C57BL/6J
PRJNA472602	SRR7203783	11	0	strain_sam	C57BL/6J
PRJNA472602	SRR7203785	12	0	strain_sam	C57BL/6J
PRJNA472602	SRR7203787	10	0	strain_sam	C57BL/6J
PRJNA472602	SRR7203793	16	0	strain_sam	C57BL/6J
PRJNA472602	SRR7203795	40	0	strain_sam	C57BL/6J
PRJNA472602	SRR7203797	27	0	strain_sam	C57BL/6J
PRJNA472602	SRR7203799	43	0	strain_sam	C57BL/6J
PRJNA472602	SRR7203801	39	0	strain_sam	C57BL/6J
PRJNA472602	SRR7203803	30	0	strain_sam	C57BL/6J
PRJNA472602	SRR7203805	23	0	strain_sam	C57BL/6J
PRJNA473083	SRR7217392	31	0	strain_sam	C57BL/6J
PRJNA473083	SRR7217393	15	0	strain_sam	C57BL/6J
PRJNA473083	SRR7217394	34	0	strain_sam	C57BL/6J
PRJNA473083	SRR7217395	29	0	strain_sam	C57BL/6J
PRJNA473083	SRR7217400	29	0	strain_sam	C57BL/6J
PRJNA473083	SRR7217401	33	0	strain_sam	C57BL/6J
PRJNA473083	SRR7217402	32	0	strain_sam	C57BL/6J
PRJNA473083	SRR7217403	34	0	strain_sam	C57BL/6J
PRJNA473083	SRR7217404	27	0	strain_sam	C57BL/6J
PRJNA473083	SRR7217405	30	0	strain_sam	C57BL/6J
PRJNA473083	SRR7217406	29	0	strain_sam	C57BL/6J
PRJNA473083	SRR7217407	33	0	strain_sam	C57BL/6J
PRJNA473982	SRR7241806	34	0	strain_sam	C57BL/6J
PRJNA473982	SRR7241807	27	0	strain_sam	C57BL/6J
PRJNA473982	SRR7241808	28	0	strain_sam	C57BL/6J
PRJNA473982	SRR7241814	34	0	strain_sam	C57BL/6J
PRJNA473982	SRR7241822	22	0	strain_sam	C57BL/6J
PRJNA475248	SRR7290164	67	0	strain_sam	C57BL/6J
PRJNA475604	SRR7292534	38	0	strain_sam	C57BL/6J
PRJNA475604	SRR7292535	101	0	strain_sam	C57BL/6J
PRJNA475604	SRR7292539	48	0	strain_sam	C57BL/6J
PRJNA475604	SRR7292541	57	0	strain_sam	C57BL/6J
PRJNA475604	SRR7292542	83	0	strain_sam	C57BL/6J
PRJNA475604	SRR7292543	47	0	strain_sam	C57BL/6J
PRJNA475604	SRR7292545	49	0	strain_sam	C57BL/6J
PRJNA475604	SRR7292546	49	0	strain_sam	C57BL/6J
PRJNA475604	SRR7292547	53	0	strain_sam	C57BL/6J
PRJNA475604	SRR7292548	37	0	strain_sam	C57BL/6J
PRJNA475604	SRR7292552	103	0	strain_sam	C57BL/6J
PRJNA475604	SRR7292553	71	0	strain_sam	C57BL/6J
PRJNA475604	SRR7292554	49	0	strain_sam	C57BL/6J
PRJNA475604	SRR7292555	141	0	strain_sam	C57BL/6J
PRJNA475604	SRR7292556	58	0	strain_sam	C57BL/6J
PRJNA475604	SRR7292557	38	0	strain_sam	C57BL/6J
PRJNA475604	SRR7292558	65	0	strain_sam	C57BL/6J
PRJNA475604	SRR7292559	61	0	strain_sam	C57BL/6J
PRJNA475604	SRR7292560	104	0	strain_sam	C57BL/6J
PRJNA475604	SRR7292561	106	0	strain_sam	C57BL/6J
PRJNA475604	SRR7292562	48	0	strain_sam	C57BL/6J
PRJNA475604	SRR7292563	44	0	strain_sam	C57BL/6J
PRJNA475604	SRR7292564	85	0	strain_sam	C57BL/6J
PRJNA475604	SRR7292565	111	0	strain_sam	C57BL/6J
PRJNA475604	SRR7292567	121	0	strain_sam	C57BL/6J
PRJNA475604	SRR7292568	64	0	strain_sam	C57BL/6J
PRJNA475604	SRR7292569	51	0	strain_sam	C57BL/6J
PRJNA475604	SRR7292570	89	0	strain_sam	C57BL/6J
PRJNA475604	SRR7292571	79	0	strain_sam	C57BL/6J
PRJNA475604	SRR7292572	44	0	strain_sam	C57BL/6J
PRJNA475604	SRR7292573	154	0	strain_sam	C57BL/6J
PRJNA475604	SRR7292574	58	0	strain_sam	C57BL/6J
PRJNA475604	SRR7292575	59	0	strain_sam	C57BL/6J
PRJNA475604	SRR7292576	43	0	strain_sam	C57BL/6J
PRJNA475604	SRR7292577	82	0	strain_sam	C57BL/6J
PRJNA475604	SRR7292578	59	0	strain_sam	C57BL/6J
PRJNA475604	SRR7292579	57	0	strain_sam	C57BL/6J
PRJNA475604	SRR7292580	78	0	strain_sam	C57BL/6J
PRJNA475604	SRR7292581	69	0	strain_sam	C57BL/6J
PRJNA475604	SRR7292582	69	0	strain_sam	C57BL/6J
PRJNA475604	SRR7292583	174	0	strain_sam	C57BL/6J
PRJNA475604	SRR7292584	45	0	strain_sam	C57BL/6J
PRJNA475604	SRR7292585	56	0	strain_sam	C57BL/6J
PRJNA475604	SRR7292586	76	0	strain_sam	C57BL/6J
PRJNA475604	SRR7292587	60	0	strain_sam	C57BL/6J
PRJNA475604	SRR7292588	94	0	strain_sam	C57BL/6J
PRJNA475604	SRR7292589	97	0	strain_sam	C57BL/6J
PRJNA475604	SRR7292590	41	0	strain_sam	C57BL/6J
PRJNA475604	SRR7292591	68	0	strain_sam	C57BL/6J
PRJNA475604	SRR7292592	87	0	strain_sam	C57BL/6J
PRJNA475604	SRR7292593	78	0	strain_sam	C57BL/6J
PRJNA475604	SRR7292594	47	0	strain_sam	C57BL/6J
PRJNA475604	SRR7292595	60	0	strain_sam	C57BL/6J
PRJNA475604	SRR7292596	31	0	strain_sam	C57BL/6J
PRJNA475604	SRR7292602	94	0	strain_sam	C57BL/6J
PRJNA475604	SRR7292603	63	0	strain_sam	C57BL/6J
PRJNA475604	SRR7292604	44	0	strain_sam	C57BL/6J
PRJNA475604	SRR7292605	111	0	strain_sam	C57BL/6J
PRJNA475604	SRR7292606	52	0	strain_sam	C57BL/6J
PRJNA475604	SRR7292607	86	0	strain_sam	C57BL/6J
PRJNA475604	SRR7292608	98	0	strain_sam	C57BL/6J
PRJNA475604	SRR7292609	115	0	strain_sam	C57BL/6J
PRJNA475604	SRR7292610	95	0	strain_sam	C57BL/6J
PRJNA475604	SRR7292611	88	0	strain_sam	C57BL/6J
PRJNA475758	SRR7295403	53	0	strain_sam	C57BL/6J
PRJNA475758	SRR7295405	86	0	strain_sam	C57BL/6J
PRJNA475758	SRR7295407	67	0	strain_sam	C57BL/6J
PRJNA475758	SRR7295409	35	0	strain_sam	C57BL/6J
PRJNA475758	SRR7295411	34	0	strain_sam	C57BL/6J
PRJNA475758	SRR7295413	36	0	strain_sam	C57BL/6J
PRJNA475758	SRR7295415	44	0	strain_sam	C57BL/6J
PRJNA475758	SRR7295417	55	0	strain_sam	C57BL/6J
PRJNA477778	SRR7419631	17	0	strain_sam	C57BL/6J
PRJNA477778	SRR7419634	20	0	strain_sam	C57BL/6J
PRJNA477778	SRR7419637	13	0	strain_sam	C57BL/6J
PRJNA477778	SRR7419638	12	0	strain_sam	C57BL/6J
PRJNA477778	SRR7419640	12	0	strain_sam	C57BL/6J
PRJNA477778	SRR7419643	12	0	strain_sam	C57BL/6J
PRJNA477778	SRR7419646	17	0	strain_sam	C57BL/6J
PRJNA477778	SRR7419649	12	0	strain_sam	C57BL/6J
PRJNA477778	SRR7419650	10	0	strain_sam	C57BL/6J
PRJNA477778	SRR7419652	17	0	strain_sam	C57BL/6J
PRJNA478050	SRR7431192	17	0	strain_sam	C57BL/6J
PRJNA478050	SRR7431194	14	0	strain_sam	C57BL/6J
PRJNA478050	SRR7431201	29	0	strain_sam	C57BL/6J
PRJNA478050	SRR7431208	19	0	strain_sam	C57BL/6J
PRJNA478050	SRR7431209	20	0	strain_sam	C57BL/6J
PRJNA478050	SRR7431210	22	0	strain_sam	C57BL/6J
PRJNA478050	SRR7431211	14	0	strain_sam	C57BL/6J
PRJNA478050	SRR7431212	19	0	strain_sam	C57BL/6J
PRJNA478229	SRR7443444	39	0	strain_sam	C57BL/6J
PRJNA478229	SRR7443446	56	0	strain_sam	C57BL/6J
PRJNA478229	SRR7443449	63	0	strain_sam	C57BL/6J
PRJNA478258	SRR7444572	55	0	strain_sam	C57BL/6J
PRJNA478258	SRR7444575	57	0	strain_sam	C57BL/6J
PRJNA478258	SRR7444578	32	0	strain_sam	C57BL/6J
PRJNA478258	SRR7444579	28	0	strain_sam	C57BL/6J
PRJNA478258	SRR7444580	49	0	strain_sam	C57BL/6J
PRJNA478258	SRR7444581	66	0	strain_sam	C57BL/6J
PRJNA478258	SRR7444582	42	0	strain_sam	C57BL/6J
PRJNA478258	SRR7444583	37	0	strain_sam	C57BL/6J
PRJNA478258	SRR7444584	44	0	strain_sam	C57BL/6J
PRJNA478258	SRR7444585	62	0	strain_sam	C57BL/6J
PRJNA478258	SRR7444586	37	0	strain_sam	C57BL/6J
PRJNA478258	SRR7444587	54	0	strain_sam	C57BL/6J
PRJNA478258	SRR7444589	31	0	strain_sam	C57BL/6J
PRJNA478258	SRR7444590	44	0	strain_sam	C57BL/6J
PRJNA478258	SRR7444591	81	0	strain_sam	C57BL/6J
PRJNA478258	SRR7444592	54	0	strain_sam	C57BL/6J
PRJNA481337	SRR7526053	145	0	strain_sam	C57BL/6J
PRJNA481337	SRR7526054	79	0	strain_sam	C57BL/6J
PRJNA481337	SRR7526057	117	0	strain_sam	C57BL/6J
PRJNA481337	SRR7526058	67	0	strain_sam	C57BL/6J
PRJNA481337	SRR7526059	90	0	strain_sam	C57BL/6J
PRJNA481337	SRR7526060	12	0	strain_sam	C57BL/6J
PRJNA481337	SRR7526061	24	0	strain_sam	C57BL/6J
PRJNA481337	SRR7526062	17	0	strain_sam	C57BL/6J
PRJNA481337	SRR7526066	26	0	strain_sam	C57BL/6J
PRJNA481474	SRR7529788	102	0	strain_sam	C57BL/6J
PRJNA481474	SRR7529789	61	0	strain_sam	C57BL/6J
PRJNA481474	SRR7529790	73	0	strain_sam	C57BL/6J
PRJNA481474	SRR7529791	74	0	strain_sam	C57BL/6J
PRJNA481474	SRR7529792	112	0	strain_sam	C57BL/6J
PRJNA481474	SRR7529793	66	0	strain_sam	C57BL/6J
PRJNA481474	SRR7529794	98	0	strain_sam	C57BL/6J
PRJNA482406	SRR7553980	10	0	strain_sam	C57BL/6J
PRJNA482469	SRR7585209	20	0	strain_sam	C57BL/6J
PRJNA482469	SRR7585210	10	0	strain_sam	C57BL/6J
PRJNA482469	SRR7585211	14	0	strain_sam	C57BL/6J
PRJNA482469	SRR7585217	10	0	strain_sam	C57BL/6J
PRJNA482469	SRR7585219	11	0	strain_sam	C57BL/6J
PRJNA482469	SRR7585221	20	0	strain_sam	C57BL/6J
PRJNA482469	SRR7585228	10	0	strain_sam	C57BL/6J
PRJNA482469	SRR7585240	17	0	strain_sam	C57BL/6J
PRJNA482469	SRR7585241	14	0	strain_sam	C57BL/6J
PRJNA482469	SRR7585243	10	0	strain_sam	C57BL/6J
PRJNA482469	SRR7585246	13	0	strain_sam	C57BL/6J
PRJNA482469	SRR7585247	17	0	strain_sam	C57BL/6J
PRJNA482469	SRR7585248	18	0	strain_sam	C57BL/6J
PRJNA482469	SRR7585249	16	0	strain_sam	C57BL/6J
PRJNA482469	SRR7585250	11	0	strain_sam	C57BL/6J
PRJNA482469	SRR7585254	10	0	strain_sam	C57BL/6J
PRJNA482469	SRR7585267	12	0	strain_sam	C57BL/6J
PRJNA482469	SRR7585271	12	0	strain_sam	C57BL/6J
PRJNA482469	SRR7585275	14	0	strain_sam	C57BL/6J
PRJNA483138	SRR7610326	37	0	strain_sam	C57BL/6J
PRJNA483138	SRR7610327	25	0	strain_sam	C57BL/6J
PRJNA483138	SRR7610328	14	0	strain_sam	C57BL/6J
PRJNA483138	SRR7610329	63	0	strain_sam	C57BL/6J
PRJNA483138	SRR7610330	28	0	strain_sam	C57BL/6J
PRJNA483138	SRR7610331	36	0	strain_sam	C57BL/6J
PRJNA483138	SRR7610332	31	0	strain_sam	C57BL/6J
PRJNA483138	SRR7610333	46	0	strain_sam	C57BL/6J
PRJNA483138	SRR7610337	30	0	strain_sam	C57BL/6J
PRJNA483138	SRR7610338	42	0	strain_sam	C57BL/6J
PRJNA483138	SRR7610339	44	0	strain_sam	C57BL/6J
PRJNA483138	SRR7610340	34	0	strain_sam	C57BL/6J
PRJNA483138	SRR7610341	14	0	strain_sam	C57BL/6J
PRJNA483138	SRR7610342	51	0	strain_sam	C57BL/6J
PRJNA483766	SRR7628972	16	0	strain_sam	C57BL/6J
PRJNA483766	SRR7628973	14	0	strain_sam	C57BL/6J
PRJNA483766	SRR7628977	107	0	strain_sam	C57BL/6J
PRJNA483766	SRR7628978	68	0	strain_sam	C57BL/6J
PRJNA483766	SRR7628979	97	0	strain_sam	C57BL/6J
PRJNA483766	SRR7628980	136	0	strain_sam	C57BL/6J
PRJNA483766	SRR7628981	66	0	strain_sam	C57BL/6J
PRJNA483766	SRR7628982	93	0	strain_sam	C57BL/6J
PRJNA483766	SRR7628983	112	0	strain_sam	C57BL/6J
PRJNA483766	SRR7628985	117	0	strain_sam	C57BL/6J
PRJNA483766	SRR7628986	106	0	strain_sam	C57BL/6J
PRJNA483766	SRR7628987	133	0	strain_sam	C57BL/6J
PRJNA483766	SRR7628988	138	0	strain_sam	C57BL/6J
PRJNA483766	SRR7628989	127	0	strain_sam	C57BL/6J
PRJNA483766	SRR7628990	91	0	strain_sam	C57BL/6J
PRJNA483766	SRR7628991	113	0	strain_sam	C57BL/6J
PRJNA483766	SRR7628992	142	0	strain_sam	C57BL/6J
PRJNA483766	SRR7628993	96	0	strain_sam	C57BL/6J
PRJNA483766	SRR7628994	73	0	strain_sam	C57BL/6J
PRJNA483766	SRR7628995	103	0	strain_sam	C57BL/6J
PRJNA483766	SRR7628996	67	0	strain_sam	C57BL/6J
PRJNA483766	SRR7628997	114	0	strain_sam	C57BL/6J
PRJNA483766	SRR7628998	116	0	strain_sam	C57BL/6J
PRJNA483766	SRR7629000	139	0	strain_sam	C57BL/6J
PRJNA483766	SRR7629001	113	0	strain_sam	C57BL/6J
PRJNA483766	SRR7629002	115	0	strain_sam	C57BL/6J
PRJNA483766	SRR7629003	97	0	strain_sam	C57BL/6J
PRJNA483766	SRR7629004	92	0	strain_sam	C57BL/6J
PRJNA484424	SRR7643401	12	0	strain_sam	C57BL/6J
PRJNA484424	SRR7643405	12	0	strain_sam	C57BL/6J
PRJNA485156	SRR7661135	29	0	strain_sam	C57BL/6J
PRJNA485156	SRR7661138	25	0	strain_sam	C57BL/6J
PRJNA485156	SRR7661139	33	0	strain_sam	C57BL/6J
PRJNA485156	SRR7661140	11	0	strain_sam	C57BL/6J
PRJNA485156	SRR7661142	32	0	strain_sam	C57BL/6J
PRJNA485156	SRR7661144	34	0	strain_sam	C57BL/6J
PRJNA485156	SRR7661147	29	0	strain_sam	C57BL/6J
PRJNA485156	SRR7661148	22	0	strain_sam	C57BL/6J
PRJNA485156	SRR7661151	19	0	strain_sam	C57BL/6J
PRJNA485156	SRR7661153	45	0	strain_sam	C57BL/6J
PRJNA486361	SRR7703248	15	0	strain_sam	C57BL/6J
PRJNA486361	SRR7703249	14	0	strain_sam	C57BL/6J
PRJNA486361	SRR7703250	15	0	strain_sam	C57BL/6J
PRJNA486361	SRR7703251	17	0	strain_sam	C57BL/6J
PRJNA486361	SRR7703253	12	0	strain_sam	C57BL/6J
PRJNA486361	SRR7703254	11	0	strain_sam	C57BL/6J
PRJNA486361	SRR7703255	13	0	strain_sam	C57BL/6J
PRJNA486361	SRR7703256	14	0	strain_sam	C57BL/6J
PRJNA486361	SRR7703259	18	0	strain_sam	C57BL/6J
PRJNA486848	SRR7724442	83	0	strain_sam	C57BL/6J
PRJNA487092	SRR7733985	73	0	strains_sam	C57BL/6J
PRJNA487092	SRR7733986	87	0	strains_sam	C57BL/6J
PRJNA487092	SRR7733988	68	0	strains_sam	C57BL/6J
PRJNA487092	SRR7733989	105	0	strains_sam	C57BL/6J
PRJNA487092	SRR7733990	97	0	strains_sam	C57BL/6J
PRJNA487092	SRR7733996	91	0	strains_sam	C57BL/6J
PRJNA487092	SRR7733998	34	0	strains_sam	C57BL/6J
PRJNA487092	SRR7734000	34	0	strains_sam	C57BL/6J
PRJNA489494	SRR7790272	12	0	strain_sam	C57BL/6J
PRJNA489494	SRR7790274	10	0	strain_sam	C57BL/6J
PRJNA489494	SRR7790275	26	0	strain_sam	C57BL/6J
PRJNA489494	SRR7790276	14	0	strain_sam	C57BL/6J
PRJNA489494	SRR7790279	32	0	strain_sam	C57BL/6J
PRJNA489494	SRR7790280	13	0	strain_sam	C57BL/6J
PRJNA489494	SRR7790281	16	0	strain_sam	C57BL/6J
PRJNA491524	SRR7867184	149	0	strain_background_sam	C57BL/6J
PRJNA491524	SRR7867185	131	0	strain_background_sam	C57BL/6J
PRJNA492474	SRR7889899	144	0	strain_sam	C57BL/6J
PRJNA492474	SRR7889901	73	0	strain_sam	C57BL/6J
PRJNA492474	SRR7889903	159	0	strain_sam	C57BL/6J
PRJNA493063	SRR7900013	15	0	strain_sam	C57BL/6J
PRJNA493063	SRR7900015	14	0	strain_sam	C57BL/6J
PRJNA494814	SRR7968310	127	0	strain_sam	C57BL/6J
PRJNA494814	SRR7968312	136	0	strain_sam	C57BL/6J
PRJNA494814	SRR7968314	97	0	strain_sam	C57BL/6J
PRJNA494814	SRR7968316	102	0	strain_sam	C57BL/6J
PRJNA494814	SRR7968318	64	0	strain_sam	C57BL/6J
PRJNA494814	SRR7968320	124	0	strain_sam	C57BL/6J
PRJNA494814	SRR7968324	96	0	strain_sam	C57BL/6J
PRJNA495161	SRR7984855	119	0	strain_sam	C57BL/6J
PRJNA495636	SRR7996763	17	0	strain_sam	C57BL/6J
PRJNA495636	SRR7996768	23	0	strain_sam	C57BL/6J
PRJNA495636	SRR7996771	14	0	strain_sam	C57BL/6J
PRJNA495636	SRR7996772	17	0	strain_sam	C57BL/6J
PRJNA495836	SRR8033043	16	0	strain_sam	C57BL/6J
PRJNA495836	SRR8033044	15	0	strain_sam	C57BL/6J
PRJNA495836	SRR8033045	10	0	strain_sam	C57BL/6J
PRJNA495836	SRR8033046	32	0	strain_sam	C57BL/6J
PRJNA495836	SRR8033047	10	0	strain_sam	C57BL/6J
PRJNA495836	SRR8033048	17	0	strain_sam	C57BL/6J
PRJNA497086	SRR10118794	24	0	strain_sam	C57BL/6J
PRJNA497086	SRR10118795	20	0	strain_sam	C57BL/6J
PRJNA497086	SRR10118798	27	0	strain_sam	C57BL/6J
PRJNA497086	SRR10118804	20	0	strain_sam	C57BL/6J
PRJNA497086	SRR8065107	35	0	strain_sam	C57BL/6J
PRJNA497086	SRR8065109	39	0	strain_sam	C57BL/6J
PRJNA497086	SRR8065112	18	0	strain_sam	C57BL/6J
PRJNA497086	SRR8065117	22	0	strain_sam	C57BL/6J
PRJNA497604	SRR8081004	35	0	strain_sam	C57BL/6J
PRJNA497998	SRR8090359	13	0	strain_sam	C57BL/6J
PRJNA497998	SRR8090363	11	0	strain_sam	C57BL/6J
PRJNA497998	SRR8090364	11	0	strain_sam	C57BL/6J
PRJNA497998	SRR8090365	12	0	strain_sam	C57BL/6J
PRJNA498043	SRR8106222	11	0	strain_sam	C57BL/6J
PRJNA503572	SRR8146736	63	0	strain_sam	C57BL/6J
PRJNA503572	SRR8146742	70	0	strain_sam	C57BL/6J
PRJNA503572	SRR8146745	114	0	strain_sam	C57BL/6J
PRJNA503572	SRR8146749	159	0	strain_sam	C57BL/6J
PRJNA503572	SRR8146768	165	0	strain_sam	C57BL/6J
PRJNA503572	SRR8146772	268	0	strain_sam	C57BL/6J
PRJNA503976	SRR8163633	20	0	strain_sam	C57BL/6J
PRJNA503976	SRR8163636	25	0	strain_sam	C57BL/6J
PRJNA503976	SRR8163638	12	0	strain_sam	C57BL/6J
PRJNA503976	SRR8163641	32	0	strain_sam	C57BL/6J
PRJNA504028	SRR8165181	51	0	strain_sam	C57BL/6J
PRJNA504028	SRR8165183	68	0	strain_sam	C57BL/6J
PRJNA504305	SRR8168074	74	0	genetic_background_sam	C57BL/6J
PRJNA504305	SRR8168076	88	0	genetic_background_sam	C57BL/6J
PRJNA504305	SRR8168078	100	0	genetic_background_sam	C57BL/6J
PRJNA504305	SRR8168080	52	0	genetic_background_sam	C57BL/6J
PRJNA504305	SRR8168085	67	0	genetic_background_sam	C57BL/6J
PRJNA504305	SRR8168091	74	0	genetic_background_sam	C57BL/6J
PRJNA504671	SRR8177161	19	0	strain_sam	C57BL/6J
PRJNA504671	SRR8177162	18	0	strain_sam	C57BL/6J
PRJNA504671	SRR8177163	18	0	strain_sam	C57BL/6J
PRJNA504671	SRR8177164	27	0	strain_sam	C57BL/6J
PRJNA504671	SRR8177165	21	0	strain_sam	C57BL/6J
PRJNA504671	SRR8177168	17	0	strain_sam	C57BL/6J
PRJNA504671	SRR8177169	22	0	strain_sam	C57BL/6J
PRJNA504671	SRR8177170	15	0	strain_sam	C57BL/6J
PRJNA504671	SRR8177171	18	0	strain_sam	C57BL/6J
PRJNA504671	SRR8177172	36	0	strain_sam	C57BL/6J
PRJNA504671	SRR8177173	28	0	strain_sam	C57BL/6J
PRJNA504671	SRR8177174	23	0	strain_sam	C57BL/6J
PRJNA504671	SRR8177175	22	0	strain_sam	C57BL/6J
PRJNA504671	SRR8177176	22	0	strain_sam	C57BL/6J
PRJNA504671	SRR8177177	29	0	strain_sam	C57BL/6J
PRJNA504671	SRR8177178	27	0	strain_sam	C57BL/6J
PRJNA504671	SRR8177179	17	0	strain_sam	C57BL/6J
PRJNA504671	SRR8177180	28	0	strain_sam	C57BL/6J
PRJNA504671	SRR8177181	19	0	strain_sam	C57BL/6J
PRJNA505693	SRR8194719	11	0	strain_sam	C57BL/6J
PRJNA505693	SRR8194721	11	0	strain_sam	C57BL/6J
PRJNA505693	SRR8194728	23	0	strain_sam	C57BL/6J
PRJNA505693	SRR8194729	10	0	strain_sam	C57BL/6J
PRJNA505693	SRR8194730	10	0	strain_sam	C57BL/6J
PRJNA505693	SRR8194737	12	0	strain_sam	C57BL/6J
PRJNA505693	SRR8194744	12	0	strain_sam	C57BL/6J
PRJNA505693	SRR8194751	10	0	strain_sam	C57BL/6J
PRJNA505693	SRR8194752	11	0	strain_sam	C57BL/6J
PRJNA505693	SRR8194760	22	0	strain_sam	C57BL/6J
PRJNA505693	SRR8194761	13	0	strain_sam	C57BL/6J
PRJNA505693	SRR8194764	10	0	strain_sam	C57BL/6J
PRJNA505693	SRR8194766	12	0	strain_sam	C57BL/6J
PRJNA505693	SRR8194768	14	0	strain_sam	C57BL/6J
PRJNA505693	SRR8194770	24	0	strain_sam	C57BL/6J
PRJNA505693	SRR8194772	26	0	strain_sam	C57BL/6J
PRJNA505693	SRR8194773	17	0	strain_sam	C57BL/6J
PRJNA505693	SRR8194775	21	0	strain_sam	C57BL/6J
PRJNA505693	SRR8194776	20	0	strain_sam	C57BL/6J
PRJNA505693	SRR8194781	14	0	strain_sam	C57BL/6J
PRJNA505693	SRR8194786	11	0	strain_sam	C57BL/6J
PRJNA505693	SRR8194787	10	0	strain_sam	C57BL/6J
PRJNA505693	SRR8194789	11	0	strain_sam	C57BL/6J
PRJNA505693	SRR8194790	10	0	strain_sam	C57BL/6J
PRJNA505693	SRR8194794	13	0	strain_sam	C57BL/6J
PRJNA505693	SRR8194797	22	0	strain_sam	C57BL/6J
PRJNA505693	SRR8194800	11	0	strain_sam	C57BL/6J
PRJNA506251	SRR8217107	59	0	strain_sam	C57BL/6J
PRJNA506251	SRR8217108	33	0	strain_sam	C57BL/6J
PRJNA506251	SRR8217109	51	0	strain_sam	C57BL/6J
PRJNA506251	SRR8217110	35	0	strain_sam	C57BL/6J
PRJNA506251	SRR8217111	54	0	strain_sam	C57BL/6J
PRJNA506251	SRR8217112	55	0	strain_sam	C57BL/6J
PRJNA506251	SRR8217113	73	0	strain_sam	C57BL/6J
PRJNA506251	SRR8217114	84	0	strain_sam	C57BL/6J
PRJNA506251	SRR8217115	60	0	strain_sam	C57BL/6J
PRJNA506251	SRR8217116	71	0	strain_sam	C57BL/6J
PRJNA506251	SRR8217117	50	0	strain_sam	C57BL/6J
PRJNA506251	SRR8217118	28	0	strain_sam	C57BL/6J
PRJNA507449	SRR8258107	33	0	strain_background_sam	C57BL/6J
PRJNA507449	SRR8258109	11	0	strain_background_sam	C57BL/6J
PRJNA507449	SRR8258114	45	0	strain_background_sam	C57BL/6J
PRJNA507449	SRR8258124	27	0	strain_background_sam	C57BL/6J
PRJNA507449	SRR8258126	34	0	strain_background_sam	C57BL/6J
PRJNA507449	SRR8258128	34	0	strain_background_sam	C57BL/6J
PRJNA507449	SRR8258131	62	0	strain_background_sam	C57BL/6J
PRJNA507449	SRR8258133	23	0	strain_background_sam	C57BL/6J
PRJNA507449	SRR8258135	21	0	strain_background_sam	C57BL/6J
PRJNA507449	SRR8258137	45	0	strain_background_sam	C57BL/6J
PRJNA507449	SRR8258139	30	0	strain_background_sam	C57BL/6J
PRJNA508422	SRR8281708	26	0	strain_sam	C57BL/6J
PRJNA508528	SRR10247817	17	0	strain_sam	C57BL/6J
PRJNA508528	SRR10247818	10	0	strain_sam	C57BL/6J
PRJNA508528	SRR10247819	26	0	strain_sam	C57BL/6J
PRJNA508528	SRR10247820	13	0	strain_sam	C57BL/6J
PRJNA508528	SRR10247821	20	0	strain_sam	C57BL/6J
PRJNA508528	SRR10247822	24	0	strain_sam	C57BL/6J
PRJNA508528	SRR10247823	16	0	strain_sam	C57BL/6J
PRJNA508528	SRR10247824	12	0	strain_sam	C57BL/6J
PRJNA508528	SRR8283677	16	0	strain_sam	C57BL/6J
PRJNA508528	SRR8283685	15	0	strain_sam	C57BL/6J
PRJNA508528	SRR8283689	12	0	strain_sam	C57BL/6J
PRJNA508528	SRR8283697	21	0	strain_sam	C57BL/6J
PRJNA508528	SRR8283699	11	0	strain_sam	C57BL/6J
PRJNA508528	SRR8283700	20	0	strain_sam	C57BL/6J
PRJNA508528	SRR8283702	22	0	strain_sam	C57BL/6J
PRJNA508528	SRR8283703	18	0	strain_sam	C57BL/6J
PRJNA508528	SRR8283707	29	0	strain_sam	C57BL/6J
PRJNA508528	SRR8283708	13	0	strain_sam	C57BL/6J
PRJNA510125	SRR8321439	19	0	strain_sam	C57BL/6J
PRJNA510125	SRR8321445	10	0	strain_sam	C57BL/6J
PRJNA510133	SRR8322033	66	0	strain_sam	C57BL/6J
PRJNA510133	SRR8322036	82	0	strain_sam	C57BL/6J
PRJNA510133	SRR8322051	69	0	strain_sam	C57BL/6J
PRJNA510133	SRR8322054	86	0	strain_sam	C57BL/6J
PRJNA510133	SRR8322057	79	0	strain_sam	C57BL/6J
PRJNA510323	SRR8327791	13	0	strain_sam	C57BL/6J
PRJNA510361	SRR8329295	10	0	strain_sam	C57BL/6J
PRJNA510361	SRR8329299	10	0	strain_sam	C57BL/6J
PRJNA510361	SRR8329301	25	0	strain_sam	C57BL/6J
PRJNA510361	SRR8329302	24	0	strain_sam	C57BL/6J
PRJNA510361	SRR8329304	17	0	strain_sam	C57BL/6J
PRJNA510361	SRR8329305	11	0	strain_sam	C57BL/6J
PRJNA510361	SRR8329306	26	0	strain_sam	C57BL/6J
PRJNA512856	SRR8392782	16	0	strain_sam	C57BL/6J
PRJNA512856	SRR8392784	14	0	strain_sam	C57BL/6J
PRJNA513983	SRR8423100	22	0	strain_sam	C57BL/6J
PRJNA513983	SRR8423104	22	0	strain_sam	C57BL/6J
PRJNA513983	SRR8423108	68	0	strain_sam	C57BL/6J
PRJNA513983	SRR8423112	29	0	strain_sam	C57BL/6J
PRJNA513983	SRR8423120	70	0	strain_sam	C57BL/6J
PRJNA513983	SRR8423124	91	0	strain_sam	C57BL/6J
PRJNA513983	SRR8423128	46	0	strain_sam	C57BL/6J
PRJNA513983	SRR8423132	38	0	strain_sam	C57BL/6J
PRJNA513983	SRR8423136	45	0	strain_sam	C57BL/6J
PRJNA513983	SRR8423140	73	0	strain_sam	C57BL/6J
PRJNA513983	SRR8423200	43	0	strain_sam	C57BL/6J
PRJNA513983	SRR8423208	26	0	strain_sam	C57BL/6J
PRJNA513983	SRR8423212	49	0	strain_sam	C57BL/6J
PRJNA513983	SRR8423216	63	0	strain_sam	C57BL/6J
PRJNA513983	SRR8423220	26	0	strain_sam	C57BL/6J
PRJNA513983	SRR8423224	43	0	strain_sam	C57BL/6J
PRJNA513983	SRR8423228	41	0	strain_sam	C57BL/6J
PRJNA513983	SRR8423240	44	0	strain_sam	C57BL/6J
PRJNA513983	SRR8423244	40	0	strain_sam	C57BL/6J
PRJNA513983	SRR8423248	39	0	strain_sam	C57BL/6J
PRJNA513983	SRR8423252	31	0	strain_sam	C57BL/6J
PRJNA513983	SRR8423256	65	0	strain_sam	C57BL/6J
PRJNA513983	SRR8423260	24	0	strain_sam	C57BL/6J
PRJNA513983	SRR8423264	54	0	strain_sam	C57BL/6J
PRJNA513983	SRR8423268	21	0	strain_sam	C57BL/6J
PRJNA513983	SRR8423272	23	0	strain_sam	C57BL/6J
PRJNA513983	SRR8423276	36	0	strain_sam	C57BL/6J
PRJNA513983	SRR8423280	79	0	strain_sam	C57BL/6J
PRJNA513983	SRR8423284	44	0	strain_sam	C57BL/6J
[truncated: 470 more rows]

## Sheet: c 6J SRA runs equivocal
Bioproject	Run Accession	Nnt exon 2 reads	Nnt exon 9 reads	Attributes.key	Attributes.value
PRJDB10114	DRR235170	8	21	strain_sam	C57BL/6J
PRJDB10114	DRR235179	34	2	strain_sam	C57BL/6J
PRJDB10114	DRR235188	40	1	strain_sam	C57BL/6J
PRJEB24456	ERR2249277	3	12	strain_sam	C57BL/6J
PRJEB25070	ERR2313900	32	1	strain_sam	C57BL/6J
PRJEB27175	ERR2617646	0	31	strain_sam	C57BL/6J
PRJEB27175	ERR2617656	8	15	strain_sam	C57BL/6J
PRJEB27175	ERR2617660	32	4	strain_sam	C57BL/6J
PRJEB28128	ERR2730412	30	8	strain_sam	C57BL/6J
PRJEB30085	ERR2983175	73	1	strain_sam	C57BL/6J
PRJEB32450	ERR3310330	15	9	strain_sam	C57BL/6J
PRJEB32450	ERR3310339	25	9	strain_sam	C57BL/6J
PRJEB32450	ERR3310340	7	16	strain_sam	C57BL/6J
PRJEB32475	ERR3316229	3	11	strain_sam	C57BL/6J
PRJEB32475	ERR3316230	9	12	strain_sam	C57BL/6J
PRJEB32475	ERR3316231	1	15	strain_sam	C57BL/6J
PRJEB32475	ERR3316232	5	11	strain_sam	C57BL/6J
PRJEB32475	ERR3316233	4	10	strain_sam	C57BL/6J
PRJEB32694	ERR3336349	3	15	strain_sam	C57BL/6J
PRJEB32694	ERR3336350	1	10	strain_sam	C57BL/6J
PRJEB32950	ERR3365716	8	13	strain_sam	C57BL/6J
PRJEB32950	ERR3365717	8	12	strain_sam	C57BL/6J
PRJEB32950	ERR3365734	8	16	strain_sam	C57BL/6J
PRJEB32950	ERR3365780	13	7	strain_sam	C57BL/6J
PRJEB32958	ERR3365969	11	8	strain_sam	C57BL/6J
PRJEB32958	ERR3365970	13	3	strain_sam	C57BL/6J
PRJEB32958	ERR3365971	15	4	strain_sam	C57BL/6J
PRJEB32958	ERR3365972	20	4	strain_sam	C57BL/6J
PRJEB32958	ERR3365973	15	6	strain_sam	C57BL/6J
PRJEB33451	ERR3427732	21	3	strain_sam	C57BL/6J
PRJEB33451	ERR3427733	23	1	strain_sam	C57BL/6J
PRJEB33451	ERR3427739	17	3	strain_sam	C57BL/6J
PRJNA169535	SRR517898	5	10	strain_sam	C57BL/6J
PRJNA214854	SRR950209	7	39	strain_background_sam_s_dpl381	C57BL/6J
PRJNA214854	SRR950210	14	7	strain_background_sam_s_dpl381	C57BL/6J
PRJNA229411	SRR1033940	8	12	strain_sam	C57BL/6J
PRJNA229411	SRR1033952	0	117	strain_sam	C57BL/6J
PRJNA229411	SRR1033962	0	11	strain_sam	C57BL/6J
PRJNA240996	SRR1187091	215	3	strain_sam	C57BL/6J
PRJNA252674	SRR1391052	215	3	strain_sam	C57BL/6J
PRJNA262674	SRR1593502	11	1	strain_sam	C57BL/6J
PRJNA264588	SRR1653952	0	84	breed_sam	C57BL/6J
PRJNA264588	SRR1654014	0	16	breed_sam	C57BL/6J
PRJNA264588	SRR1654132	0	61	breed_sam	C57BL/6J
PRJNA264588	SRR1654133	0	134	breed_sam	C57BL/6J
PRJNA264588	SRR1654134	0	261	breed_sam	C57BL/6J
PRJNA264588	SRR1654135	0	719	breed_sam	C57BL/6J
PRJNA264588	SRR1654161	0	30	breed_sam	C57BL/6J
PRJNA264588	SRR1654172	0	321	breed_sam	C57BL/6J
PRJNA264807	SRR1624948	215	3	strain_sam	C57BL/6J
PRJNA264807	SRR1624953	233	2	strain_sam	C57BL/6J
PRJNA264807	SRR1624954	289	2	strain_sam	C57BL/6J
PRJNA268973	SRR1686783	14	4	strain_sam	C57BL/6J
PRJNA276574	SRR1820964	0	30	tag_sam	C57BL/6J
PRJNA276574	SRR1820966	0	24	tag_sam	C57BL/6J
PRJNA276574	SRR1820968	2	25	tag_sam	C57BL/6J
PRJNA276574	SRR1820969	0	18	tag_sam	C57BL/6J
PRJNA276574	SRR1820970	1	16	tag_sam	C57BL/6J
PRJNA279486	SRR1930930	8	18	strain_sam	C57BL/6J
PRJNA279486	SRR1930942	4	12	strain_sam	C57BL/6J
PRJNA279486	SRR1930962	6	14	strain_sam	C57BL/6J
PRJNA279486	SRR1931028	11	6	strain_sam	C57BL/6J
PRJNA279486	SRR1931030	0	11	strain_sam	C57BL/6J
PRJNA279486	SRR1931035	5	15	strain_sam	C57BL/6J
PRJNA279486	SRR1931050	0	17	strain_sam	C57BL/6J
PRJNA279486	SRR3137837	0	22	strain_sam	C57BL/6J
PRJNA279486	SRR3137841	0	59	strain_sam	C57BL/6J
PRJNA279486	SRR3137868	0	48	strain_sam	C57BL/6J
PRJNA284679	SRR2038194	16	1	strain_sam	C57BL/6J
PRJNA284927	SRR2040102	9	38	strain_background_sam	C57BL/6J
PRJNA295089	SRR2302178	18	5	strain_sam	C57BL/6J
PRJNA300632	SRR2874486	76	6	strain_background_sam_s_dpl381	C57BL/6J
PRJNA300632	SRR2874488	204	2	strain_background_sam_s_dpl381	C57BL/6J
PRJNA300632	SRR2874491	168	3	strain_background_sam_s_dpl381	C57BL/6J
PRJNA300632	SRR2874492	271	9	strain_background_sam_s_dpl381	C57BL/6J
PRJNA300632	SRR2874493	199	7	strain_background_sam_s_dpl381	C57BL/6J
PRJNA300632	SRR2874495	246	1	strain_background_sam_s_dpl381	C57BL/6J
PRJNA301340	SRR2927704	0	60	strain_sam	C57BL/6J
PRJNA302882	SRR2938782	1	30	background_strain_sam_s_dpl78	C57BL/6J
PRJNA312845	SRR3182851	32	2	strain_sam	C57BL/6J
PRJNA312845	SRR3182857	53	1	strain_sam	C57BL/6J
PRJNA315344	SRR3226445	7	29	background_strain_sam_s_dpl78	C57BL/6J
PRJNA315344	SRR3226450	3	14	background_strain_sam_s_dpl78	C57BL/6J
PRJNA315344	SRR3226455	1	18	background_strain_sam_s_dpl78	C57BL/6J
PRJNA315344	SRR3226456	1	121	background_strain_sam_s_dpl78	C57BL/6J
PRJNA315344	SRR3226650	2	70	background_strain_sam_s_dpl78	C57BL/6J
PRJNA315344	SRR3226651	0	17	background_strain_sam_s_dpl78	C57BL/6J
PRJNA315344	SRR3226653	0	43	background_strain_sam_s_dpl78	C57BL/6J
PRJNA315344	SRR3226672	1	30	background_strain_sam_s_dpl78	C57BL/6J
PRJNA315344	SRR3226687	0	72	background_strain_sam_s_dpl78	C57BL/6J
PRJNA315344	SRR3226688	0	113	background_strain_sam_s_dpl78	C57BL/6J
PRJNA315344	SRR3226689	0	38	background_strain_sam_s_dpl78	C57BL/6J
PRJNA315344	SRR3226720	2	16	background_strain_sam_s_dpl78	C57BL/6J
PRJNA315344	SRR3226822	3	14	background_strain_sam_s_dpl78	C57BL/6J
PRJNA315344	SRR3226823	1	10	background_strain_sam_s_dpl78	C57BL/6J
PRJNA315344	SRR3226853	3	77	background_strain_sam_s_dpl78	C57BL/6J
PRJNA315666	SRR3236824	5	30	strain_sam	C57BL/6J
PRJNA317062	SRR3319517	0	11	strain_sam	C57BL/6J
PRJNA317062	SRR3319536	0	15	strain_sam	C57BL/6J
PRJNA324547	SRR3630460	44	3	strain_sam	C57BL/6J
PRJNA329408	SRR3927220	12	7	strain_sam	C57BL/6J
PRJNA329408	SRR3927226	20	1	strain_sam	C57BL/6J
PRJNA343599	SRR4269914	9	15	strain_sam	C57BL/6J
PRJNA371812	SRR5238613	0	44	strain_sam	C57BL/6J
PRJNA379430	SRR5350371	5	15	strain_sam	C57BL/6J
PRJNA379430	SRR5350392	9	21	strain_sam	C57BL/6J
PRJNA385694	SRR5514640	9	58	strain_background_sam	C57BL/6J
PRJNA386382	SRR5533421	0	78	strain_sam	C57BL/6J
PRJNA386382	SRR5533434	0	58	strain_sam	C57BL/6J
PRJNA387703	SRR5591654	9	21	strain_sam	C57BL/6J
PRJNA387703	SRR5591656	7	17	strain_sam	C57BL/6J
PRJNA387703	SRR5591659	6	15	strain_sam	C57BL/6J
PRJNA387703	SRR5591660	7	12	strain_sam	C57BL/6J
PRJNA390541	SRR6292823	0	13	strain_sam	C57BL/6J
PRJNA390628	SRR5755754	7	40	strain_sam	C57BL/6J
PRJNA390628	SRR5755756	8	24	strain_sam	C57BL/6J
PRJNA390628	SRR5755766	4	14	strain_sam	C57BL/6J
PRJNA390628	SRR5755767	3	10	strain_sam	C57BL/6J
PRJNA390628	SRR5755797	7	14	strain_sam	C57BL/6J
PRJNA397216	SRR5901902	248	1	strain_sam	C57BL/6J
PRJNA397481	SRR6006941	47	3	background_strain_sam_s_dpl78	C57BL/6J
PRJNA398499	SRR5937650	3	11	strain_sam	C57BL/6J
PRJNA407286	SRR6037891	14	3	strain_sam	C57BL/6J
PRJNA407818	SRR6049392	2	12	strain_sam	C57BL/6J
PRJNA407818	SRR6049400	6	41	strain_sam	C57BL/6J
PRJNA417717	SRR6277004	3	20	strain_sam	C57BL/6J
PRJNA429358	SRR6456733	247	4	strain_sam	C57BL/6J
PRJNA432435	SRR6660265	22	1	strain_sam	C57BL/6J
PRJNA434076	SRR6726022	7	13	strain_sam	C57BL/6J
PRJNA438296	SRR6833753	52	9	strain_sam	C57BL/6J
PRJNA438296	SRR6833757	60	3	strain_sam	C57BL/6J
PRJNA438296	SRR6833765	113	3	strain_sam	C57BL/6J
PRJNA449667	SRR6983501	249	1	strain_sam	C57BL/6J
PRJNA454857	SRR7106465	0	18	strain_sam	C57BL/6J
PRJNA471297	SRR7162009	52	2	strain_sam	C57BL/6J
PRJNA473157	SRR7221050	6	37	strain_sam	C57BL/6J
PRJNA473157	SRR7221055	6	41	strain_sam	C57BL/6J
PRJNA473157	SRR7221058	6	15	strain_sam	C57BL/6J
PRJNA473157	SRR7221060	4	21	strain_sam	C57BL/6J
PRJNA473157	SRR7221061	7	26	strain_sam	C57BL/6J
PRJNA473982	SRR7241823	19	5	strain_sam	C57BL/6J
PRJNA473982	SRR7241827	24	4	strain_sam	C57BL/6J
PRJNA475248	SRR7290158	54	2	strain_sam	C57BL/6J
PRJNA477779	SRR7419681	0	68	strain_sam	C57BL/6J
PRJNA477779	SRR7419686	9	24	strain_sam	C57BL/6J
PRJNA477779	SRR7419687	8	100	strain_sam	C57BL/6J
PRJNA477779	SRR7419689	16	2	strain_sam	C57BL/6J
PRJNA477779	SRR7419691	9	52	strain_sam	C57BL/6J
PRJNA483138	SRR7610335	61	2	strain_sam	C57BL/6J
PRJNA483138	SRR7610336	38	1	strain_sam	C57BL/6J
PRJNA484954	SRR7656040	8	33	strain_background_sam	C57BL/6J
PRJNA485939	SRR7691876	17	1	breed_sam	C57BL/6J
PRJNA485939	SRR7691877	11	2	breed_sam	C57BL/6J
PRJNA485939	SRR7691878	14	1	breed_sam	C57BL/6J
PRJNA485939	SRR7691879	10	1	breed_sam	C57BL/6J
PRJNA485939	SRR7691880	18	2	breed_sam	C57BL/6J
PRJNA485939	SRR7691881	11	1	breed_sam	C57BL/6J
PRJNA485966	SRR7692173	8	11	breed_sam	C57BL/6J
PRJNA485966	SRR7692174	8	23	breed_sam	C57BL/6J
PRJNA489193	SRR7781406	6	16	strain_background_sam_s_dpl381	C57BL/6J
PRJNA489274	SRR7784139	8	10	strain_sam	C57BL/6J
PRJNA491524	SRR7867187	97	2	strain_background_sam	C57BL/6J
PRJNA491524	SRR7867188	112	2	strain_background_sam	C57BL/6J
PRJNA493063	SRR7900012	12	1	strain_sam	C57BL/6J
PRJNA495161	SRR7984843	0	62	strain_sam	C57BL/6J
PRJNA495601	SRR7993618	34	4	strain_sam	C57BL/6J
PRJNA498055	SRR8096090	7	16	strain_sam	C57BL/6J
PRJNA498055	SRR8096092	11	4	strain_sam	C57BL/6J
PRJNA498055	SRR8096093	23	9	strain_sam	C57BL/6J
PRJNA498055	SRR8096238	15	9	strain_sam	C57BL/6J
PRJNA498055	SRR8096239	16	9	strain_sam	C57BL/6J
PRJNA498055	SRR8096241	12	9	strain_sam	C57BL/6J
PRJNA498055	SRR8096243	22	9	strain_sam	C57BL/6J
PRJNA506249	SRR8217192	0	12	strain_sam	C57BL/6J
PRJNA506249	SRR8217195	0	12	strain_sam	C57BL/6J
PRJNA506249	SRR8217198	1	11	strain_sam	C57BL/6J
PRJNA510125	SRR8321442	13	1	strain_sam	C57BL/6J
PRJNA510125	SRR8321451	23	1	strain_sam	C57BL/6J
PRJNA510133	SRR8322030	79	2	strain_sam	C57BL/6J
PRJNA510133	SRR8322039	84	1	strain_sam	C57BL/6J
PRJNA510133	SRR8322042	86	1	strain_sam	C57BL/6J
PRJNA510133	SRR8322045	93	4	strain_sam	C57BL/6J
PRJNA510133	SRR8322048	42	2	strain_sam	C57BL/6J
PRJNA510133	SRR8322060	90	4	strain_sam	C57BL/6J
PRJNA510133	SRR8322063	88	4	strain_sam	C57BL/6J
PRJNA511896	SRR8370614	7	15	strain_sam	C57BL/6J
PRJNA511896	SRR8370615	5	16	strain_sam	C57BL/6J
PRJNA511896	SRR8370618	6	29	strain_sam	C57BL/6J
PRJNA511896	SRR8370619	7	57	strain_sam	C57BL/6J
PRJNA511896	SRR8370624	6	27	strain_sam	C57BL/6J
PRJNA511896	SRR8370627	4	35	strain_sam	C57BL/6J
PRJNA511896	SRR8370629	6	15	strain_sam	C57BL/6J
PRJNA511896	SRR8370631	6	17	strain_sam	C57BL/6J
PRJNA511896	SRR8370633	2	20	strain_sam	C57BL/6J
PRJNA511896	SRR8370635	3	10	strain_sam	C57BL/6J
PRJNA511896	SRR8370639	6	18	strain_sam	C57BL/6J
PRJNA511896	SRR8370640	6	17	strain_sam	C57BL/6J
PRJNA511896	SRR8370641	9	37	strain_sam	C57BL/6J
PRJNA511896	SRR8370642	1	17	strain_sam	C57BL/6J
PRJNA515906	SRR8456375	0	20	strain_sam	C57BL/6J
PRJNA516915	SRR8483092	3	23	strain_sam	C57BL/6J
PRJNA516915	SRR8483094	0	28	strain_sam	C57BL/6J
PRJNA516915	SRR8483095	2	29	strain_sam	C57BL/6J
PRJNA516915	SRR8483099	2	17	strain_sam	C57BL/6J
PRJNA516915	SRR8483101	9	41	strain_sam	C57BL/6J
PRJNA516915	SRR8483102	3	56	strain_sam	C57BL/6J
PRJNA516915	SRR8483103	2	30	strain_sam	C57BL/6J
PRJNA516915	SRR8483104	2	59	strain_sam	C57BL/6J
PRJNA517321	SRR8492101	1	15	strain_sam	C57BL/6J
PRJNA517321	SRR8492102	4	17	strain_sam	C57BL/6J
PRJNA517321	SRR8492105	7	18	strain_sam	C57BL/6J
PRJNA523501	SRR8658701	15	1	strain_sam	C57BL/6J
PRJNA523501	SRR8658717	10	6	strain_sam	C57BL/6J
PRJNA523501	SRR8658721	12	2	strain_sam	C57BL/6J
PRJNA523501	SRR8658722	14	2	strain_sam	C57BL/6J
PRJNA523501	SRR8658724	23	3	strain_sam	C57BL/6J
PRJNA523501	SRR8658760	11	5	strain_sam	C57BL/6J
PRJNA523501	SRR8658763	11	3	strain_sam	C57BL/6J
PRJNA523511	SRR8601605	2	37	strain_sam	C57BL/6J
PRJNA523511	SRR8601606	0	39	strain_sam	C57BL/6J
PRJNA527312	SRR8735104	25	1	strain_sam	C57BL/6J
PRJNA528435	SRR10067714	39	5	strain_sam	C57BL/6J
PRJNA528435	SRR8760383	7	34	strain_sam	C57BL/6J
PRJNA528662	SRR8776165	0	11	strain_background_sam	C57BL/6J
PRJNA528662	SRR8776179	0	12	strain_background_sam	C57BL/6J
PRJNA528662	SRR8776180	18	2	strain_background_sam	C57BL/6J
PRJNA528662	SRR8776184	0	14	strain_background_sam	C57BL/6J
PRJNA528662	SRR8776216	0	13	strain_background_sam	C57BL/6J
PRJNA528662	SRR8776233	3	12	strain_background_sam	C57BL/6J
PRJNA529614	SRR8798831	4	316	strain_background_sam_s_dpl381	C57BL/6J
PRJNA529614	SRR8798853	6	377	strain_background_sam_s_dpl381	C57BL/6J
PRJNA529794	SRR8809616	0	13	strain_sam	C57BL/6J
PRJNA531378	SRR8863822	8	17	strain_sam	C57BL/6J
PRJNA531378	SRR8863823	9	33	strain_sam	C57BL/6J
PRJNA531378	SRR8863826	5	33	strain_sam	C57BL/6J
PRJNA531378	SRR8863827	7	48	strain_sam	C57BL/6J
PRJNA531378	SRR8863828	3	32	strain_sam	C57BL/6J
PRJNA531378	SRR8863835	2	19	strain_sam	C57BL/6J
PRJNA541922	SRR9029582	26	8	strain_sam	C57BL/6J
PRJNA552845	SRR9646304	17	9	genetic_background_sam	C57BL/6J
PRJNA552845	SRR9646305	14	6	genetic_background_sam	C57BL/6J
PRJNA552845	SRR9646307	22	3	genetic_background_sam	C57BL/6J
PRJNA552845	SRR9646309	14	7	genetic_background_sam	C57BL/6J
PRJNA552845	SRR9646312	0	11	genetic_background_sam	C57BL/6J
PRJNA552845	SRR9646313	0	11	genetic_background_sam	C57BL/6J
PRJNA552845	SRR9646317	9	18	genetic_background_sam	C57BL/6J
PRJNA552845	SRR9646318	11	5	genetic_background_sam	C57BL/6J
PRJNA554357	SRR9677268	16	4	strain_sam	C57BL/6J
PRJNA554357	SRR9677271	0	14	strain_sam	C57BL/6J
PRJNA554357	SRR9677272	11	9	strain_sam	C57BL/6J
PRJNA554357	SRR9677277	13	4	strain_sam	C57BL/6J
PRJNA554357	SRR9677278	24	1	strain_sam	C57BL/6J
PRJNA556004	SRR11256406	4	18	strain_sam	C57BL/6J
PRJNA556004	SRR11256442	0	29	strain_sam	C57BL/6J
PRJNA557487	SRR9864020	9	16	strain_sam	C57BL/6J
PRJNA557653	SRR9867805	121	1	strain_background_sam_s_dpl381	C57BL/6J
PRJNA563863	SRR10066429	9	30	strain_sam	C57BL/6J
PRJNA563863	SRR10066438	7	16	strain_sam	C57BL/6J
PRJNA563863	SRR10066439	9	18	strain_sam	C57BL/6J
PRJNA563863	SRR10066440	4	10	strain_sam	C57BL/6J
PRJNA563863	SRR10066453	12	2	strain_sam	C57BL/6J
PRJNA563863	SRR10066465	5	32	strain_sam	C57BL/6J
PRJNA563863	SRR10066470	7	10	strain_sam	C57BL/6J
PRJNA563863	SRR10066568	10	2	strain_sam	C57BL/6J
PRJNA563863	SRR10066606	6	10	strain_sam	C57BL/6J
PRJNA563889	SRR10067622	18	1	strain_sam	C57BL/6J
PRJNA564032	SRR10071222	10	3	strain_sam	C57BL/6J

## Sheet: d Nnt exon2 vs exons2&9 
		K-mer mining (see Supplementary Fig. 12a)								Ncbi BLAST confirmation
										(see also Supplemenatery Fig. 12b)
Bioproject	Run Accession	Nnt_Exon_2	Nnt_Exon_9	Consistent with 6J	strain	genotype				Nnt_Exon_2	Nnt_Exon_9
PRJNA385694	SRR5514625	15	0	Y	C57BL/6J	WT				16	0
PRJNA385694	SRR5514631	11	0	Y	C57BL/6J	WT
PRJNA385694	SRR5514632	10	0	Y	C57BL/6J	WT
PRJNA385694	SRR5514637	13	0	Y	C57BL/6J	WT
PRJNA385694	SRR5514624	24	0	Y	C57BL/6J	WT
PRJNA385694	SRR5514626	26	0	Y	C57BL/6J	WT
PRJNA385694	SRR5514630	9	0	Y	C57BL/6J	WT
PRJNA385694	SRR5514636	8	0	Y	C57BL/6J	WT
PRJNA385694	SRR5514638	7	0	Y	C57BL/6J	WT
PRJNA385694	SRR5514628	33	66	N	C57BL/6J	miR-31 KO				33	69
PRJNA385694	SRR5514629	45	79	N	C57BL/6J	miR-31 KO
PRJNA385694	SRR5514633	33	48	N	C57BL/6J	miR-31 KO
PRJNA385694	SRR5514634	28	48	N	C57BL/6J	miR-31 KO
PRJNA385694	SRR5514635	17	35	N	C57BL/6J	miR-31 KO
PRJNA385694	SRR5514640	9	58	N	C57BL/6J	miR-31 KO
PRJNA385694	SRR5514627	38	125	N	C57BL/6J	miR-31 KO
PRJNA385694	SRR5514639	32	60	N	C57BL/6J	miR-31 KO
PRJNA385694	SRR5514641	28	93	N	C57BL/6J	miR-31 KO
Bioproject	Run Accession	Nnt_Exon_2	Nnt_Exon_9	Consistent with 6J	strain	genotype
PRJEB30085	ERR2983174	51	0	Y	C57BL/6J	Rel -/-; Nfkb1-/-; Cd4Cre;Rela fx/fx				53	0
PRJEB30085	ERR2983173	70	0	Y	C57BL/6J	Rel -/-; Nfkb1-/-; Cd4Cre;Rela fx/fx
PRJEB30085	ERR2983176	64	0	Y	C57BL/6J	Rel -/-; Nfkb1-/-; Cd4Cre;Rela fx/fx
PRJEB30085	ERR2983172	58	0	Y	C57BL/6J	Rel -/-; Nfkb1-/-; Cd4Cre;Rela fx/fx
PRJEB30085	ERR2983175	73	1	Y	C57BL/6J	Rel -/-; Nfkb1-/-; Cd4Cre;Rela fx/fx
PRJEB30085	ERR2983178	100	159	N	C57BL/6J	wild type genotype				102	165													250/2899
PRJEB30085	ERR2983177	93	115	N	C57BL/6J	wild type genotype
PRJEB30085	ERR2983179	64	114	N	C57BL/6J	wild type genotype
PRJEB30085	ERR2983180	85	132	N	C57BL/6J	wild type genotype
PRJEB30085	ERR2983181	130	175	N	C57BL/6J	wild type genotype
Bioproject	Run Accession	Nnt_Exon_2	Nnt_Exon_9	Consistent with 6J	Source name	Not identifed by k-mer mining of SRA
PRJNA209846	SRR923434	39	87	N	ESC line Bruce4	see Supplementary Fig. 13				40	88
Bioproject	Run Accession	Nnt_Exon_2	Nnt_Exon_9	Consistent with 6J	strain	genotype
PRJNA662247	SRR12606803	25	63	N	C57BL/6J	CysC knockout
PRJNA662247	SRR12606790	19	89	N	C57BL/6J	CysC knockout
PRJNA662247	SRR12606809	61	173	N	C57BL/6J	CysC knockout
PRJNA662247	SRR12606812	43	170	N	C57BL/6J	CysC knockout
PRJNA662247	SRR12606810	34	76	N	C57BL/6J	CysC knockout
PRJNA662247	SRR12606802	28	167	N	C57BL/6J	CysC knockout
PRJNA662247	SRR12606797	22	141	N	C57BL/6J	CysC knockout
PRJNA662247	SRR12606795	26	123	N	C57BL/6J	CysC knockout
PRJNA662247	SRR12606811	49	154	N	C57BL/6J	CysC knockout
PRJNA662247	SRR12606804	28	62	N	C57BL/6J	CysC knockout
PRJNA662247	SRR12606796	27	123	N	C57BL/6J	CysC knockout
PRJNA662247	SRR12606789	19	53	N	C57BL/6J	CysC knockout
PRJNA662247	SRR12606788	29	99	N	C57BL/6J	CysC knockout
PRJNA662247	SRR12606806	25	0	Y	C57BL/6J	wildtype
PRJNA662247	SRR12606808	21	0	Y	C57BL/6J	wildtype
PRJNA662247	SRR12606805	20	0	Y	C57BL/6J	wildtype
PRJNA662247	SRR12606800	15	0	Y	C57BL/6J	wildtype
PRJNA662247	SRR12606794	12	0	Y	C57BL/6J	wildtype
PRJNA662247	SRR12606793	11	0	Y	C57BL/6J	wildtype
PRJNA662247	SRR12606787	23	0	Y	C57BL/6J	wildtype
PRJNA662247	SRR12606799	16	6	??	C57BL/6J	wildtype
PRJNA662247	SRR12606807	23	0	Y	C57BL/6J	wildtype
PRJNA662247	SRR12606798	14	63	N	C57BL/6J	wildtype
PRJNA662247	SRR12606801	17	0	Y	C57BL/6J	wildtype
Bioproject	Run Accession	Nnt_Exon_2	Nnt_Exon_9	Consistent with 6J	strain	genotype
PRJNA528435	SRR10067710	54	19	N	C57BL/6J	BMmono_Des_rep1
PRJNA528435	SRR10067711	56	18	N	C57BL/6J	BMmono_Des_rep2
PRJNA528435	SRR10067714	39	5	??	C57BL/6J	BMmono_Dll4TgfbDes_rep1
PRJNA528435	SRR10067712	40	12	N	C57BL/6J	BMmono_Dll4Tgfb_rep1
PRJNA528435	SRR10067708	40	14	N	C57BL/6J	BMmono_Dll4_rep1
PRJNA528435	SRR10067706	38	19	N	C57BL/6J	BMmono_NoTx_rep1
PRJNA528435	SRR8760420	15	0	Y	C57BL/6J	C57BL/6J
PRJNA528435	SRR8760423	29	0	Y	C57BL/6J	C57BL/6J
PRJNA528435	SRR8760422	27	0	Y	C57BL/6J	C57BL/6J
PRJNA528435	SRR8760424	19	0	Y	C57BL/6J	C57BL/6J
PRJNA528435	SRR8760378	39	42	N	C57BL/6J	C57BL/6J
PRJNA528435	SRR8760382	19	19	N	C57BL/6J	C57BL/6J
PRJNA528435	SRR8760425	17	0	Y	C57BL/6J	C57BL/6J
PRJNA528435	SRR8760419	44	0	Y	C57BL/6J	C57BL/6J
PRJNA528435	SRR8760379	19	58	N	C57BL/6J	C57BL/6J
PRJNA528435	SRR8760417	35	0	Y	C57BL/6J	C57BL/6J
PRJNA528435	SRR8760411	27	0	Y	C57BL/6J	C57BL/6J
PRJNA528435	SRR8760349	11	0	Y	C57BL/6J	C57BL/6J
PRJNA528435	SRR8760418	33	0	Y	C57BL/6J	C57BL/6J
PRJNA528435	SRR8760354	24	33	N	Clec4f-cre/Rosa26iDTR	Clec4f-cre/Rosa26iDTR
PRJNA528435	SRR8760362	35	41	N	Clec4f-cre/Rosa26iDTR	Clec4f-cre/Rosa26iDTR
PRJNA528435	SRR8760352	21	17	N	Clec4f-cre/Rosa26iDTR	Clec4f-cre/Rosa26iDTR
PRJNA528435	SRR8760363	32	43	N	Clec4f-cre/Rosa26iDTR	Clec4f-cre/Rosa26iDTR
PRJNA528435	SRR8760360	36	27	N	Clec4f-cre/Rosa26iDTR	Clec4f-cre/Rosa26iDTR
PRJNA528435	SRR8760351	26	0	Y	Clec4f-cre/Rosa26iDTR	Clec4f-cre/Rosa26iDTR
PRJNA528435	SRR8760361	35	36	N	Clec4f-cre/Rosa26iDTR	Clec4f-cre/Rosa26iDTR
PRJNA528435	SRR8760350	26	27	N	Clec4f-cre/Rosa26iDTR	Clec4f-cre/Rosa26iDTR
PRJNA528435	SRR8760365	67	49	N	Clec4f-cre/Rosa26iDTR	Clec4f-cre/Rosa26iDTR
PRJNA528435	SRR8760364	32	73	N	Clec4f-cre/Rosa26iDTR	Clec4f-cre/Rosa26iDTR
PRJNA528435	SRR8760353	18	16	N	Clec4f-cre/Rosa26iDTR	Clec4f-cre/Rosa26iDTR
PRJNA528435	SRR10067702	15	0	Y	C57BL/6J	Dll1Ab_Tx_rep1
PRJNA528435	SRR10067703	24	0	Y	C57BL/6J	Dll1Ab_Tx_rep2
PRJNA528435	SRR10067704	33	0	Y	C57BL/6J	Dll1Ab_Tx_rep3
PRJNA528435	SRR10067705	10	0	Y	C57BL/6J	Dll1Ab_Tx_rep4
PRJNA528435	SRR10067698	30	0	Y	C57BL/6J	LY411575_Tx_rep2
PRJNA528435	SRR10067699	25	0	Y	C57BL/6J	LY411575_Tx_rep3
PRJNA528435	SRR8760376	82	70	N	Nr1h3 KO	Nr1h3 KO
PRJNA528435	SRR8760377	58	69	N	Nr1h3 KO	Nr1h3 KO
PRJNA528435	SRR8760374	47	0	Y	Nr1h3 WT	Nr1h3 WT
PRJNA528435	SRR8760375	16	0	Y	Nr1h3 WT	Nr1h3 WT
PRJNA528435	SRR8760368	48	65	N	Nr1h3 flox/flox	Nr1h3 flox/flox
PRJNA528435	SRR8760369	46	54	N	Nr1h3 flox/flox	Nr1h3 flox/flox
PRJNA528435	SRR8760391	30	0	Y	Smad4 flox/flox	Smad4 flox/flox
PRJNA528435	SRR8760394	54	0	Y	Smad4 flox/flox	Smad4 flox/flox
PRJNA528435	SRR8760397	55	0	Y	Smad4 flox/flox	Smad4 flox/flox
PRJNA528435	SRR8760392	51	0	Y	Smad4 flox/flox	Smad4 flox/flox
PRJNA528435	SRR8760393	48	0	Y	Smad4 flox/flox	Smad4 flox/flox
PRJNA528435	SRR8760396	57	0	Y	Smad4 flox/flox	Smad4 flox/flox
PRJNA528435	SRR8760385	34	35	N	Smad4 flox/flox	Smad4 flox/flox
PRJNA528435	SRR8760395	52	0	Y	Smad4 flox/flox	Smad4 flox/flox
PRJNA528435	SRR8760410	62	68	N	Smad4 flox/flox Clec4f-cre +/-	Smad4 flox/flox Clec4f-cre +/-
PRJNA528435	SRR8760402	92	67	N	Smad4 flox/flox Clec4f-cre +/-	Smad4 flox/flox Clec4f-cre +/-
PRJNA528435	SRR8760401	71	64	N	Smad4 flox/flox Clec4f-cre +/-	Smad4 flox/flox Clec4f-cre +/-
PRJNA528435	SRR8760387	42	44	N	Smad4 flox/flox Clec4f-cre +/-	Smad4 flox/flox Clec4f-cre +/-
PRJNA528435	SRR8760405	99	86	N	Smad4 flox/flox Clec4f-cre +/-	Smad4 flox/flox Clec4f-cre +/-
PRJNA528435	SRR8760389	44	0	Y	Smad4 flox/flox Clec4f-cre +/-	Smad4 flox/flox Clec4f-cre +/-
PRJNA528435	SRR8760386	34	1	??	Smad4 flox/flox Clec4f-cre +/-	Smad4 flox/flox Clec4f-cre +/-
PRJNA528435	SRR8760390	55	38	N	Smad4 flox/flox Clec4f-cre +/-	Smad4 flox/flox Clec4f-cre +/-
PRJNA528435	SRR8760408	72	55	N	Smad4 flox/flox Clec4f-cre +/-	Smad4 flox/flox Clec4f-cre +/-
PRJNA528435	SRR8760406	70	71	N	Smad4 flox/flox Clec4f-cre +/-	Smad4 flox/flox Clec4f-cre +/-
PRJNA528435	SRR8760409	55	54	N	Smad4 flox/flox Clec4f-cre +/-	Smad4 flox/flox Clec4f-cre +/-
Bioproject	Accession	Nnt_Exon_2	Nnt_Exon_9	Consistent with 6J	strain	genotype
PRJNA563889	SRR10067610	55	82	N	C57BL/6J	Sesn1-/-
PRJNA563889	SRR10067612	89	124	N	C57BL/6J	Sesn1-/-
PRJNA563889	SRR10067617	67	89	N	C57BL/6J	Sesn1-/-
PRJNA563889	SRR10067613	69	102	N	C57BL/6J	Sesn1-/-
PRJNA563889	SRR10067611	48	73	N	C57BL/6J	Sesn1-/-
PRJNA563889	SRR10067614	49	61	N	C57BL/6J	Sesn1-/-
PRJNA563889	SRR10067615	33	56	N	C57BL/6J	Sesn1-/-
PRJNA563889	SRR10067619	12	0	Y	C57BL/6J	wild type
PRJNA563889	SRR10067620	10	0	Y	C57BL/6J	wild type
PRJNA563889	SRR10067622	18	1	Y	C57BL/6J	wild type
PRJNA563889	SRR10067606	17	0	Y	C57BL/6J	wild type
PRJNA563889	SRR10067625	19	0	Y	C57BL/6J	wild type
PRJNA563889	SRR10067591	15	0	Y	C57BL/6J	Sesn1SkM-Tg
PRJNA563889	SRR10067596	15	23	N	C57BL/6J	Sesn2SkM-Tg
PRJNA563889	SRR10067602	13	14	N	C57BL/6J	Sesn2SkM-Tg
PRJNA563889	SRR10067600	21	34	N	C57BL/6J	Sesn2SkM-Tg
PRJNA563889	SRR10067595	50	46	N	C57BL/6J	Sesn2SkM-Tg
PRJNA563889	SRR10067599	21	28	N	C57BL/6J	Sesn2SkM-Tg
PRJNA563889	SRR10067597	48	57	N	C57BL/6J	Sesn2SkM-Tg
PRJNA563889	SRR10067598	57	46	N	C57BL/6J	Sesn2SkM-Tg

## Sheet: e PRJNA382450
GEO	Run Accession	Fig		Bioproject	Run Accession	Nnt_Exon_2	Nnt_Exon_9	Consistent with 6J	strain	genotype
GSM2649613		Figure_1A_1B_3_4_Sup_Fig_2_Figure_1A_WT_0h_1		PRJNA382450	SRR5644666	61	0	Y	C57BL/6J	WT
GSM2649614		Figure_1A_1B_3_4_Sup_Fig_2_WT_0h_10		PRJNA382450	SRR5644667	2	0	Y	C57BL/6J	WT
GSM2649615		Figure_1A_1B_3_4_Sup_Fig_2_WT_0h_11_KO_analysis_live_hk		PRJNA382450	SRR5644668	84	0	Y	C57BL/6J	WT
GSM2649616		Figure_1A_1B_3_4_Sup_Fig_2_WT_0h_12		PRJNA382450	SRR5644669	86	0	Y	C57BL/6J	WT
GSM2649617		Figure_1A_1B_3_4_Sup_Fig_2_WT_0h_13		PRJNA382450	SRR5644671	3	0	Y	C57BL/6J	WT
GSM2649618		Figure_1A_1B_3_4_Sup_Fig_2_WT_0h_2		PRJNA382450	SRR5644672	58	0	Y	C57BL/6J	WT
GSM2649619		Figure_1A_1B_3_4_Sup_Fig_2_WT_0h_3		PRJNA382450	SRR5644673	84	0	Y	C57BL/6J	WT
GSM2649620		Figure_1A_1B_3_4_Sup_Fig_2_WT_0h_4		PRJNA382450	SRR5644674	24	0	Y	C57BL/6J	WT
GSM2649621		Figure_1A_1B_3_4_Sup_Fig_2_WT_0h_5_DKO_analysis_live_and_hk		PRJNA382450	SRR5644675	36	0	Y	C57BL/6J	WT
GSM2649622		Figure_1A_1B_3_4_Sup_Fig_2_WT_0h_6_KO_analysis_live_hk		PRJNA382450	SRR5644676	80	0	Y	C57BL/6J	WT
GSM2649623		Figure_1A_1B_3_4_Sup_Fig_2_WT_0h_7		PRJNA382450	SRR5644678	79	0	Y	C57BL/6J	WT
GSM2649624		Figure_1A_1B_3_4_Sup_Fig_2_WT_0h_8		PRJNA382450	SRR5644680	23	0	Y	C57BL/6J	WT
GSM2649625		Figure_1A_1B_3_4_Sup_Fig_2_WT_0h_9		PRJNA382450	SRR5644681	11	0	Y	C57BL/6J	WT
GSM2649626		Figure_1A_3_4_Live_WT_120_1_DKO_analysis		PRJNA382450	SRR5644682	24	0	Y	C57BL/6J	WT
GSM2649627		Figure_1A_3_4_Live_WT_120_2_KO_analysis		PRJNA382450	SRR5644683	13	0	Y	C57BL/6J	WT
GSM2649628		Figure_1A_3_4_Live_WT_120_3_KO_analysis		PRJNA382450	SRR5644684	26	0	Y	C57BL/6J	WT
GSM2649629		Figure_1A_3_4_Live_WT_120_4		PRJNA382450	SRR5644685	19	0	Y	C57BL/6J	WT
GSM2649630		Figure_1A_3_4_Live_WT_240_1_DKO_analysis		PRJNA382450	SRR5644686	37	0	Y	C57BL/6J	WT
GSM2649631		Figure_1A_3_4_Live_WT_240_2_KO_analysis		PRJNA382450	SRR5644687	14	0	Y	C57BL/6J	WT
GSM2649632		Figure_1A_3_4_Live_WT_240_3_KO_analysis		PRJNA382450	SRR5644688	61	0	Y	C57BL/6J	WT
GSM2649633		Figure_1A_3_4_Live_WT_240_4		PRJNA382450	SRR5644689	19	0	Y	C57BL/6J	WT
GSM2649634		Figure_1A_3_4_Live_WT_30_1_DKO_analysis		PRJNA382450	SRR5644690	84	0	Y	C57BL/6J	WT
GSM2649635		Figure_1A_3_4_Live_WT_30_2_KO_analysis		PRJNA382450	SRR5644691	5	0	Y	C57BL/6J	WT
GSM2649636		Figure_1A_3_4_Live_WT_30_3_KO_analysis		PRJNA382450	SRR5644693	31	0	Y	C57BL/6J	WT
GSM2649637		Figure_1A_3_4_Live_WT_30_4		PRJNA382450	SRR5644694	88	0	Y	C57BL/6J	WT
GSM2649638		Figure_1A_3_4_Live_WT_60_1_DKO_analysis		PRJNA382450	SRR5644696	31	0	Y	C57BL/6J	WT
GSM2649639		Figure_1A_3_4_Live_WT_60_2_KO_analysis		PRJNA382450	SRR5644697	40	0	Y	C57BL/6J	WT
GSM2649640		Figure_1A_3_4_Live_WT_60_3_KO_analysis		PRJNA382450	SRR5644698	20	0	Y	C57BL/6J	WT
GSM2649641		Figure_1A_3_4_Live_WT_60_4		PRJNA382450	SRR5644699	53	0	Y	C57BL/6J	WT
GSM2649642		Figure_1B_4_Sup_Fig_2_HK_WT_120_1_DKO_analysis_KO_analysis		PRJNA382450	SRR5644702	17	0	Y	C57BL/6J	WT
GSM2649643		Figure_1B_4_Sup_Fig_2_HK_WT_120_2_DKO_analysis		PRJNA382450	SRR5644703	31	0	Y	C57BL/6J	DKO
GSM2649644		Figure_1B_4_Sup_Fig_2_HK_WT_240_1_DKO_analysis_KO_analysis		PRJNA382450	SRR5644705	23	0	Y	C57BL/6J	DKO
GSM2649645		Figure_1B_4_Sup_Fig_2_HK_WT_240_2_DKO_analysis		PRJNA382450	SRR5644707	10	0	Y	C57BL/6J	DKO
GSM2649646		Figure_1B_4_Sup_Fig_2_HK_WT_30_1_DKO_analysis_KO_analysis		PRJNA382450	SRR5644709	4	0	Y	C57BL/6J	DKO
GSM2649647		Figure_1B_4_Sup_Fig_2_HK_WT_30_2_DKO_analysis		PRJNA382450	SRR5644712	28	0	Y	C57BL/6J	KO
GSM2649648		Figure_1B_4_Sup_Fig_2_HK_WT_60_1_DKO_analysis_KO_analysis		PRJNA382450	SRR5644713	43	0	Y	C57BL/6J	KO
GSM2649649		Figure_1B_4_Sup_Fig_2_HK_WT_60_2_DKO_analysis		PRJNA382450	SRR5644714	33	0	Y	C57BL/6J	KO
GSM2649650		Figure_3_DKO_0_2_DKO_analysis_live		PRJNA382450	SRR5644715	24	0	Y	C57BL/6J	KO
GSM2649651		Figure_3_Live_DKO_120_1_DKO_analysis		PRJNA382450	SRR5644717	45	0	Y	C57BL/6J	KO
GSM2649652		Figure_3_Live_DKO_120_2_DKO_analysis		PRJNA382450	SRR5644718	68	0	Y	C57BL/6J	KO
GSM2649653	SRR5644706	Figure_3_Live_DKO_240_1_DKO_analysis		PRJNA382450	SRR5644719	54	0	Y	C57BL/6J	KO
GSM2649654		Figure_3_Live_DKO_240_2_DKO_analysis		PRJNA382450	SRR5644725	41	0	Y	C57BL/6J	KO
GSM2649655		Figure_3_Live_DKO_30_1_DKO_analysis		PRJNA382450	SRR5644726	21	0	Y	C57BL/6J	KO
GSM2649656		Figure_3_Live_DKO_30_2_DKO_analysis		PRJNA382450	SRR5644728	75	0	Y	C57BL/6J	DKO
GSM2649657		Figure_3_Live_DKO_60_1_DKO_analysis		PRJNA382450	SRR5644729	54	0	Y	C57BL/6J	DKO
GSM2649658		Figure_3_Live_DKO_60_2_DKO_analysis		PRJNA382450	SRR5644730	45	0	Y	C57BL/6J	DKO
GSM2649659		Figure_3_Live_KO_120_1_KO_analysis		PRJNA382450	SRR5644731	20	0	Y	C57BL/6J	DKO
GSM2649660		Figure_3_Live_KO_120_2_KO_analysis		PRJNA382450	SRR5644732	53	0	Y	C57BL/6J	DKO
GSM2649661		Figure_3_Live_KO_240_1_KO_analysis		PRJNA382450	SRR5644733	16	0	Y	C57BL/6J	DKO
GSM2649662		Figure_3_Live_KO_240_2_KO_analysis		PRJNA382450	SRR5644734	52	0	Y	C57BL/6J	DKO
GSM2649663		Figure_3_Live_KO_30_1_KO_analysis		PRJNA382450	SRR5644735	35	0	Y	C57BL/6J	DKO
GSM2649664		Figure_3_Live_KO_30_2_KO_analysis		PRJNA382450	SRR5644737	54	0	Y	C57BL/6J	KO
GSM2649665		Figure_3_Live_KO_60_1_KO_analysis		PRJNA382450	SRR5644738	34	0	Y	C57BL/6J	KO
GSM2649666		Figure_3_Live_KO_60_2_KO_analysis		PRJNA382450	SRR5644740	14	0	Y	C57BL/6J	KO
GSM2649667	SRR5644720	Figure_3_Live_WT_120_DKO_analysis		PRJNA382450	SRR5644743	16	0	Y	C57BL/6J	KO
GSM2649668	SRR5644721	Figure_3_Live_WT_240_DKO_analysis		PRJNA382450	SRR5644744	54	0	Y	C57BL/6J	KO
GSM2649669	SRR5644722	Figure_3_Live_WT_30_DKO_analysis		PRJNA382450	SRR5644747	67	0	Y	C57BL/6J	WT
GSM2649670	SRR5644723	Figure_3_Live_WT_60_DKO_analysis		PRJNA382450	SRR5644748	36	0	Y	C57BL/6J	WT
GSM2649671		Figure_3_Sup_Fig_2_DKO_0_1_DKO_analysis_live_and_hk		PRJNA382450	SRR5644706	5	4	N	C57BL/6J	DKO
GSM2649672		Figure_3_Sup_Fig_2_KO_0_1_KO_analysis_live_and_hk		PRJNA382450	SRR5644720	45	52	N	C57BL/6J	WT
GSM2649673		Figure_3_Sup_Fig_2_KO_0_2_KO_analysis_live_and_hk		PRJNA382450	SRR5644721	118	135	N	C57BL/6J	WT
GSM2649674	SRR5644727	Figure_3_Sup_Fig_2_WT_0h_DKO_analysis_live_and_hk		PRJNA382450	SRR5644722	189	190	N	C57BL/6J	WT
GSM2649675		Sup_Fig_2_DKO_0_2_DKO_analysis		PRJNA382450	SRR5644723	158	153	N	C57BL/6J	WT
GSM2649676		Sup_Fig_2_HK_DKO_120_1_DKO_analysis		PRJNA382450	SRR5644727	94	110	N	C57BL/6J	WT
GSM2649677		Sup_Fig_2_HK_DKO_120_2_DKO_analysis
GSM2649678		Sup_Fig_2_HK_DKO_240_1_DKO_analysis
GSM2649679		Sup_Fig_2_HK_DKO_240_2_DKO_analysis
GSM2649680		Sup_Fig_2_HK_DKO_30_1_DKO_analysis
GSM2649681		Sup_Fig_2_HK_DKO_30_2_DKO_analysis
GSM2649682		Sup_Fig_2_HK_DKO_60_1_DKO_analysis
GSM2649683		Sup_Fig_2_HK_DKO_60_2_DKO_analysis
GSM2649684		Sup_Fig_2_HK_KO_120_1_KO_analysis
GSM2649685		Sup_Fig_2_HK_KO_120_2_KO_analysis
GSM2649686		Sup_Fig_2_HK_KO_240_1_KO_analysis
GSM2649687		Sup_Fig_2_HK_KO_240_2_KO_analysis
GSM2649688		Sup_Fig_2_HK_KO_30_1_KO_analysis
GSM2649689		Sup_Fig_2_HK_KO_30_2_KO_analysis
GSM2649690		Sup_Fig_2_HK_KO_60_1_KO_analysis
GSM2649691		Sup_Fig_2_HK_KO_60_2_KO_analysis
GSM2649692		Sup_Fig_2_HK_WT_120_KO_analysis
GSM2649693		Sup_Fig_2_HK_WT_240_KO_analysis
GSM2649694		Sup_Fig_2_HK_WT_30_KO_analysis
GSM2649695		Sup_Fig_2_HK_WT_60_KO_analysis

## Sheet: f Mixed Nnt+ & - groups 
Bioproject	Accession	Nnt_Exon_2	Nnt_Exon_9	Consistent with 6J	strain	genotype			Bioproject	Accession	Nnt_Exon_2	Nnt_Exon_9	Consistent with 6J	strain	genotype		Bioproject	Accession	Nnt_Exon_2	Nnt_Exon_9	Consistent with 6J	strain	genotype			Bioproject	Accession	Nnt_Exon_2	Nnt_Exon_9	Consistent with 6J	strain	genotype		Bioproject	Accession	Nnt_Exon_2	Nnt_Exon_9	Consistent with 6J	strain	genotype
PRJNA264807	SRR1624958	408	759	N	C57BL/6J	combined knockout			PRJNA563886	SRR10067433	21	53	N	C57BL/6J Lrp1fl/flOlig1Cre	KO		PRJNA359189	SRR5133541	20	49	N	C57BL/6J	KLF2 and KLF4 double knockout			PRJNA471297	SRR7161841	36	0	Y	C57BL/6J	CTR1_Liver_ZT02_female		PRJNA553290	SRR9656910	47	44	N	C57BL/6J	UBC-CreERT2;Hic1F/F
PRJNA264807	SRR1624973	456	746	N	C57BL/6J	combined knockout			PRJNA563886	SRR10067457	88	94	N	C57BL/6J Lrp1fl/flOlig1Cre	KO		PRJNA359189	SRR5133543	55	0	Y	C57BL/6J	KLF2 and KLF4 double knockout			PRJNA471297	SRR7161849	43	0	Y	C57BL/6J	CTR1_Liver_ZT06_female		PRJNA553290	SRR9656906	74	38	N	C57BL/6J	UBC-CreERT2;Hic1F/F
PRJNA264807	SRR1624960	343	635	N	C57BL/6J	combined knockout			PRJNA563886	SRR10067439	79	88	N	C57BL/6J Lrp1fl/flOlig1Cre	KO		PRJNA359189	SRR5133544	34	26	N	C57BL/6J	KLF2 and KLF4 double knockout			PRJNA471297	SRR7161857	47	0	Y	C57BL/6J	CTR1_Liver_ZT10_female		PRJNA553290	SRR9656930	53	57	N	C57BL/6J	UBC-CreERT2;Hic1F/F
PRJNA264807	SRR1624959	305	463	N	C57BL/6J	combined knockout			PRJNA563886	SRR10067433	21	53	N	C57BL/6J Lrp1fl/flOlig1Cre	KO		PRJNA359189	SRR5133552	33	0	Y	C57BL/6J	KLF4 knockout			PRJNA471297	SRR7161865	33	0	Y	C57BL/6J	CTR1_Liver_ZT14_female		PRJNA553290	SRR9656926	67	72	N	C57BL/6J	UBC-CreERT2;Hic1F/F
PRJNA264807	SRR1624961	355	483	N	C57BL/6J	combined knockout			PRJNA563886	SRR10067440	67	117	N	C57BL/6J Lrp1fl/flOlig1Cre	KO		PRJNA359189	SRR5133550	19	0	Y	C57BL/6J	KLF4 knockout			PRJNA471297	SRR7161873	31	0	Y	C57BL/6J	CTR1_Liver_ZT18_female		PRJNA553290	SRR9656934	40	32	N	C57BL/6J	UBC-CreERT2;Hic1F/F
PRJNA264807	SRR1624975	380	520	N	C57BL/6J	combined knockout			PRJNA563886	SRR10067449	62	0	Y	C57BL/6J Lrp1fl/flOlig1Cre	KO		PRJNA359189	SRR5133551	28	0	Y	C57BL/6J	KLF4 knockout			PRJNA471297	SRR7161881	44	0	Y	C57BL/6J	CTR1_Liver_ZT22_female		PRJNA553290	SRR9656938	37	43	N	C57BL/6J	UBC-CreERT2;Hic1F/F
PRJNA264807	SRR1624974	339	343	N	C57BL/6J	combined knockout			PRJNA563886	SRR10067434	38	0	Y	C57BL/6J Lrp1fl/flOlig1Cre	KO		PRJNA359189	SRR5133540	22	0	Y	C57BL/6J	cre control			PRJNA471297	SRR7161889	45	0	Y	C57BL/6J	CTR2_Liver_ZT02_female		PRJNA553290	SRR9656890	19	0	Y	C57BL/6J	WT;Hic1F/F
PRJNA264807	SRR1624976	396	406	N	C57BL/6J	combined knockout			PRJNA563886	SRR10067450	53	0	Y	C57BL/6J Lrp1fl/flOlig1Cre	KO		PRJNA359189	SRR5133537	41	0	Y	C57BL/6J	cre control			PRJNA471297	SRR7161913	61	0	Y	C57BL/6J	CTR2_Liver_ZT14_female		PRJNA553290	SRR9656882	15	0	Y	C57BL/6J	WT;Hic1F/F
PRJNA264807	SRR1624964	265	416	N	C57BL/6J	combined knockout			PRJNA563886	SRR10067436	11	0	Y	C57BL/6J Lrp1fl/flOlig1Cre	WT		PRJNA359189	SRR5133539	28	0	Y	C57BL/6J	cre control			PRJNA471297	SRR7161921	32	0	Y	C57BL/6J	CTR2_Liver_ZT18_female		PRJNA553290	SRR9656902	41	48	N	C57BL/6J	WT;Hic1F/F
PRJNA264807	SRR1624955	285	531	N	C57BL/6J	germline PKCepsilon knockout			PRJNA563886	SRR10067436	11	0	Y	C57BL/6J Lrp1fl/flOlig1Cre	WT		PRJNA359189	SRR5133538	15	0	Y	C57BL/6J	cre control			PRJNA471297	SRR7161929	53	0	Y	C57BL/6J	CTR2_Liver_ZT22_female		PRJNA553290	SRR9656898	84	95	N	C57BL/6J	WT;Hic1F/F
PRJNA264807	SRR1624972	349	604	N	C57BL/6J	germline PKCepsilon knockout			PRJNA563886	SRR10067459	60	0	Y	C57BL/6J Lrp1fl/flOlig1Cre	WT											PRJNA471297	SRR7161937	44	0	Y	C57BL/6J	GFM1_Liver_ZT02_female		PRJNA553290	SRR9656878	15	0	Y	C57BL/6J	WT;Hic1F/F
PRJNA264807	SRR1624971	353	218	N	C57BL/6J	germline PKCepsilon knockout			PRJNA563886	SRR10067447	72	0	Y	C57BL/6J Lrp1fl/flOlig1Cre	WT											PRJNA471297	SRR7161945	36	0	Y	C57BL/6J	GFM1_Liver_ZT06_female
PRJNA264807	SRR1624956	328	665	N	C57BL/6J	germline PKCepsilon knockout			PRJNA563886	SRR10067454	64	0	Y	C57BL/6J Lrp1fl/flOlig1Cre	WT											PRJNA471297	SRR7161961	33	0	Y	C57BL/6J	GFM1_Liver_ZT14_female
PRJNA264807	SRR1624957	284	316	N	C57BL/6J	germline PKCepsilon knockout			PRJNA563886	SRR10067435	34	0	Y	C57BL/6J Lrp1fl/flOlig1Cre	WT											PRJNA471297	SRR7161969	52	0	Y	C57BL/6J	GFM1_Liver_ZT18_female
PRJNA264807	SRR1624970	381	364	N	C57BL/6J	germline PKCepsilon knockout			PRJNA563886	SRR10067460	43	0	Y	C57BL/6J Lrp1fl/flOlig1Cre	WT											PRJNA471297	SRR7161977	54	0	Y	C57BL/6J	GFM1_Liver_ZT22_female
PRJNA264807	SRR1624969	458	786	N	C57BL/6J	germline PKCepsilon knockout			PRJNA563886	SRR10067453	57	0	Y	C57BL/6J Lrp1fl/flOlig1Cre	WT											PRJNA471297	SRR7161985	90	161	N	C57BL/6J	GFM2_Liver_ZT02_female
PRJNA264807	SRR1624953	233	2	Y	C57BL/6J	postnatal cardiac PKCdelta ablation			PRJNA563886	SRR10067445	40	0	Y	C57BL/6J Lrp1fl/flOlig1Cre	WT											PRJNA471297	SRR7161993	120	201	N	C57BL/6J	GFM2_Liver_ZT06_female
PRJNA264807	SRR1624954	289	2	Y	C57BL/6J	postnatal cardiac PKCdelta ablation			PRJNA563886	SRR10067444	46	0	Y	C57BL/6J Lrp1fl/flOlig1Cre	WT											PRJNA471297	SRR7162001	86	174	N	C57BL/6J	GFM2_Liver_ZT10_female
PRJNA264807	SRR1624952	200	0	Y	C57BL/6J	postnatal cardiac PKCdelta ablation			PRJNA563886	SRR10067452	63	0	Y	C57BL/6J Lrp1fl/flOlig1Cre	WT											PRJNA471297	SRR7162009	52	2	Y	C57BL/6J	GFM2_Liver_ZT14_female
PRJNA264807	SRR1624968	378	451	N	C57BL/6J	postnatal cardiac PKCdelta ablation			PRJNA563886	SRR10067467	115	102	N	C57BL/6J LRP1fl/flPdgfraCre-ERt2	KO											PRJNA471297	SRR7162017	51	0	Y	C57BL/6J	GFM2_Liver_ZT18_female
PRJNA264807	SRR1624966	326	322	N	C57BL/6J	postnatal cardiac PKCdelta ablation			PRJNA563886	SRR10067465	21	0	Y	C57BL/6J LRP1fl/flPdgfraCre-ERt2	WT											PRJNA471297	SRR7162025	38	0	Y	C57BL/6J	GFM2_Liver_ZT22_female
PRJNA264807	SRR1624967	327	265	N	C57BL/6J	postnatal cardiac PKCdelta ablation			PRJNA563886	SRR10067466	70	0	Y	C57BL/6J LRP1fl/flPdgfraCre-ERt2	WT											PRJNA471297	SRR7161817	43	0	Y	C57BL/6J	Liver Total RNA
									PRJNA563886	SRR10067463	89	0	Y	C57BL/6J LRP1fl/flPdgfraCre-ERt2	WT											PRJNA471297	SRR7161809	34	0	Y	C57BL/6J	Liver Total RNA
PRJNA264807	SRR1624948	215	3	Y	C57BL/6J	wild-type
PRJNA264807	SRR1624949	268	372	N	C57BL/6J	wild-type
PRJNA264807	SRR1624963	292	308	N	C57BL/6J	wild-type
PRJNA264807	SRR1624950	231	266	N	C57BL/6J	wild-type
PRJNA264807	SRR1624965	364	431	N	C57BL/6J	wild-type
PRJNA264807	SRR1624962	309	456	N	C57BL/6J	wild-type
PRJNA264807	SRR1624951	293	37	N	C57BL/6J	wild-type
